# Supplementary material for: Systems-level characterization of a host-microbe metabolic symbiosis in the mammalian gut
Source: PubMed Central journal article supplement — Gut Microbes. 2013 Jan 1;4(1):28–40. doi: 10.4161/gmic.22370 (PMC3555882; doi:10.4161/gmic.22370), 2013-01-01
Supplement: gmic-4-28-s01.pdf [file gmic-4-28-s01.pdf]

## **Supplemental Material to:**

**Almut Heinken, Swagatika Sahoo, Ronan Fleming and  
Ines Thiele**

**Systems-level characterization of a host-microbe  
metabolic symbiosis in the mammalian gut**

**Gut Microbes 2013; 4(1)**

**<http://dx.doi.org/10.4161/gmic.22370>**

**[http://www.landesbioscience.com/journals/gutmicrobes/  
article/22370/](http://www.landesbioscience.com/journals/gutmicrobes/article/22370/)**

## Supplemental text:

Heinken et al., “Systems-level characterization of a host-microbe metabolic symbiosis in the mammalian gut “

## Table of Contents

|                                                                                             |           |
|---------------------------------------------------------------------------------------------|-----------|
| <b>Supplemental results</b> .....                                                           | <b>2</b>  |
| <i>Curation of an automated draft reconstruction for Bacteroides thetaiotaomicron</i> ..... | 2         |
| <i>Addition of species-specific pathways</i> .....                                          | 4         |
| <i>In silico gene essentiality analysis</i> .....                                           | 6         |
| <i>Rational and implementation of coupling constraints in the integrated model</i> .....    | 7         |
| <b>Supplemental figures</b> .....                                                           | <b>8</b>  |
| <b>Supplemental tables</b> .....                                                            | <b>12</b> |
| <b>Supplemental References</b> .....                                                        | <b>21</b> |

## Supplemental results

### *Curation of an automated draft reconstruction for *Bacteroides thetaiotaomicron**

We automatically generated a partially curated draft reconstruction using Model Seed<sup>1</sup>. We then manually inspected, curated, and validated the content of the draft reconstruction based on a protocol for curation of automated models<sup>1</sup> and established methods in metabolic network reconstruction<sup>2</sup> (Figure S1). Primary and review literature and databases (Table S13) were used to obtain *B. thetaiotaomicron*-specific information for gene annotation, biochemical pathway utilization, cofactor and electron carrier usage, and other physiological and phenotypical properties.

The draft reconstruction for *B. thetaiotaomicron*, deemed *BΘ\_Seed\_v1*, contained 777 genes, 944 metabolites, and 989 reactions, of which 429 could not carry any flux (i.e., blocked reactions). Careful inspection of pathways, cofactor and electron carrier utilization, and reaction directionality led to rejection of 87 reactions (8,8%) and a change in directionality for 230 reactions (23%). One reaction, formate tetrahydrofolate ligase (FTHFL), was made irreversible to prevent biologically infeasible ATP production. Gene-protein-reaction associations (GPRs) define the gene(s) whose product(s) catalyzes a reaction(s) through Boolean rules ('AND', 'OR'). Ten GPRs were changed manually based on online genome databases. A total of 108 genes (14%) were removed, most of which were involved in transcription and translation processes, which are generally considered to be outside the scope of metabolic reconstructions<sup>2</sup>.

### *Curation of the biomass reaction*

A biomass reaction contains the fractional contribution of all known metabolic precursors required to synthesize a new cell. The biomass reaction in *BΘ\_Seed\_v1* included 76 default components<sup>1</sup>. Apo-ACP was removed since no other model in the BiGG database<sup>3</sup> includes this compound in the biomass reaction. Sulfate was removed as it does not serve as sulfur source for *B. thetaiotaomicron*<sup>4</sup>. Sulfide is used to synthesize cysteine, which is captured by the biomass reaction. Biotin was also added as a universally required cofactor. The essential cofactors Vitamin B12 (cob(I)alamin) and protoheme were added<sup>4</sup>. Sodium was added<sup>5</sup>. The components names biomass, DNA replication, RNA transcription, and protein biosynthesis were removed from the curated biomass reaction.

### *Curation of electron transport chain reactions*

Electron transport chain reactions in *BΘ\_Seed\_v1* were curated based on literature. *B. thetaiotaomicron* possesses an anaerobic electron transport chain with fumarate as the terminal electron acceptor, which is reduced to succinate. NADH serves as electron donor<sup>6</sup>, but not NADPH<sup>7</sup>. This electron transport system provides additional ATP. It is catalyzed by a succinate: quinone oxidoreductase (EC 1.3.99.1, BiGG ID: FRD2, SUCDi) that functions both as fumarate reductase and succinate dehydrogenase. If fumarate reductase is not functional due to lack of heme, or if the SQR operon is knocked out, growth yield decreases two- to threefold<sup>8, 9</sup>. Apart from NADH, hydrogen can also serve as electron donor for fumarate reduction via a fumarate-dependent hydrogenase. The flow of electrons from hydrogen to NAD<sup>+</sup> is mediated by ferredoxin<sup>7, 9</sup>. Apart from fumarate, oxygen also serves as terminal electron acceptor. This is mediated by cytochrome bd oxidase. Fumarate reductase and cytochrome oxidase have redundant roles in metabolism<sup>10</sup>. Ubiquinone was not found in *B. thetaiotaomicron*<sup>11</sup>. However, a NADH: ubiquinone oxidoreductase is annotated in its genome. *B. thetaiotaomicron* possesses a pyruvate: quinone oxidoreductase (EC 1.2.2.2, BiGG ID: POX, BT\_1820, BT\_1822), which does not accept menaquinone (KEGG Enzyme<sup>12</sup>). Taken together, this evidence suggests involvement of fumarate, ferredoxin,

hydrogen, NADH, oxygen and menaquinone, but not NADPH, in the electron transport chain of *B. thetaiotaomicron*. It is unclear whether *B. thetaiotaomicron* utilizes ubiquinone. Since evidence from literature is unclear, it was assumed that both menaquinone and ubiquinone are used as cofactors. Therefore, menaquinone-utilizing reactions were added where appropriate.

### **Carbohydrate metabolism**

The following central metabolic pathways of *B. thetaiotaomicron* were all accounted for in *BΘ\_Seed\_v1*: i) carbohydrates metabolism via Embden-Meyerhof<sup>13</sup> and pentose phosphate pathway<sup>14</sup>, ii) acetate fermentation and the succinate-propionate pathways<sup>13</sup>, and iii) the oxidative branch of the citric acid cycle<sup>15</sup>.

### **Amino acid metabolism**

*B. thetaiotaomicron* is able to synthesize all amino acids *de novo*<sup>4</sup>. *BΘ\_Seed\_v1* could not synthesize arginine, since the wrong reaction was associated with N-acetyl-L-ornithine transcarbamylase (BT\_3717). The reaction catalyzed by this enzyme is different in *Bacteroides* species, as it catalyzes the carbamylation of N-succinyl-L-ornithine to N-succinyl-L-citrulline<sup>16</sup>, is converted to citrulline, a precursor of arginine. It is not known how N-succinyl-L-ornithine is formed. Thus, a hypothetical synthesis reaction (BiGG ID: HYPUSUCORNS) was included for this metabolite, assuming that N-succinyl-L-ornithine is synthesized from succinate and ornithine. Formation of citrulline from N-succinyl-L-citrulline was assumed to occur spontaneously, as proposed by KEGG Pathway<sup>17</sup>. Adding these reactions allowed the model to synthesize arginine. Furthermore, *BΘ\_Seed\_v1* lacked an associated gene for homoserine kinase (EC 2.7.1.39, BiGG ID: HSK). We assigned gene BT\_2402 to this reaction, as the associated protein has 90- 99% sequence identity with several *Bacteroides* *ssp.* homoserine kinases (determined using blastp). An additional pathway for isoleucine biosynthesis via citramalate, which is mainly found in archaea, is annotated in the *B. thetaiotaomicron* genome. This pathway was added to the reconstruction. It is unclear whether urea excretion occurs in *B. thetaiotaomicron*. Most urea cycle enzymes, namely argininosuccinate synthase (EC 6.3.4.5), argininosuccinate lyase (EC 4.3.2.1), and a putative arginase (EC 3.5.3.1) are annotated in the *B. thetaiotaomicron* genome. A transport reaction for urea was included in *BΘ\_Seed\_v1*. In the absence of contrary information, the reaction was left in the reconstruction.

*B. thetaiotaomicron*'s proteolytic activity is weak, but detectable<sup>18</sup>, and several di- and tripeptide transporters and aminopeptidases are annotated in its genome. Dipeptide degradation was already accounted for in *BΘ\_Seed\_v1* but the corresponding transporters were added. We included a dipeptidyl peptidase specific for arginylarginine and phenylalanylarginine<sup>19</sup>.

### **Fatty acid metabolism**

*B. thetaiotaomicron* is well established to synthesize anteiso- and iso-methyl-branched chain fatty acids<sup>11, 20, 21</sup>. Biosynthesis pathways for most these fatty acids were already included in *BΘ\_Seed\_v1* but the biomass reaction was incomplete. We modified the biomass function accordingly. The enzymes glycerol-3-phosphate acyltransferase (EC 2.3.1.15, BiGG ID: G3PAT) and glycerol kinase (EC 2.7.1.30, BiGG ID: GLYKr), which were added by Model Seed during the auto-completion step, are not annotated in the *B. thetaiotaomicron* genome, but are required in the reconstruction for fatty acid biosynthesis to be functional. It is not known, which enzymes perform these steps *in vivo*.

### **Biosynthesis of cofactors and prosthetic groups**

*B. thetaiotaomicron* is able to synthesize all required cofactors *de novo*<sup>4</sup>, except heme and cobalamin (Vitamin B12). *BΘ\_Seed\_v1* could not synthesize *de novo* pantothenate, folate,

thiamin, and biotin. For pantothenate biosynthesis, we added the annotated pantothenate synthetase (EC 6.3.2.1, BiGG ID: PANTS, BT\_4308). For completion of the folate biosynthesis, we added the folate reductase (EC 1.5.1.3, BiGG ID: FOLR, BT\_0106 or BT\_2048). We assumed that BT\_3017, an acid phosphatase with wide specificity, catalyzed the reaction of the thiamin diphosphatase (EC 3.1.3.2, BiGG ID: THMDP). We also added a demand reaction for (4-hydroxybenzyl alcohol, BiGG ID: 4hba), whose metabolic fate is unknown. These two additions completed the thiamine synthesis. The complete biotin biosynthesis pathway was recently discovered in *E. coli*<sup>22</sup>. We assumed the same pathway to occur in *B. thetaiotaomicron*. *B $\theta$ \_Seed\_v1* accounted for menaquinone-(MK-) 8, but we also included biosynthesis pathways for MK-7, MK-9, MK-10 and MK-11, as these isoprenes were found in *B. thetaiotaomicron*<sup>11</sup>. Menaquinone (vitamin K<sub>2</sub>) synthesized by the microbiota, particularly *Bacteroides*, also partially contribute to human vitamin K homeostasis<sup>23</sup>. Therefore, we included transport and exchange reactions for menaquinone 7-11.

### **Validation of the metabolic reconstruction of *B. thetaiotaomicron***

The resulting updated draft reconstruction was deemed *B $\theta$ \_Seed\_v2*. By comparing its *in silico* phenotypic capabilities with published data, we further refined and ultimately validated its content. *B. thetaiotaomicron* can grow anaerobically on glucose minimal medium<sup>4</sup>, consisting of glucose, minerals, CO<sub>2</sub>, NH<sub>4</sub>, heme, cobalamin (Vitamin B12), and either sulfide or L-cysteine.

*B $\theta$ \_Seed\_v2* was incapable of growing without oxygen. *B. thetaiotaomicron* does not require oxygen for growth and colonies stop growing when exposed to oxygen due to enzyme damage in central metabolism<sup>6</sup>. We evaluated *B $\theta$ \_Seed\_v2*'s oxygen usage using flux variability analysis, FVA<sup>24, 25</sup>. Oxygen was consumed by the reaction catalyzed by L-aspartate oxidase (EC 1.4.3.16, BT\_3184), but this enzyme is also able to use fumarate for the cofactor reoxidation<sup>12</sup>. We added the fumarate-dependent reaction (BiGG ID: ASPO5), which enabled the model to grow anaerobically. *Bacteroides* species have been found to benefit from nanomolar concentrations of oxygen due to cytochrome oxidase bd activity<sup>10</sup>. This reaction was accounted for in *B $\theta$ \_Seed\_v2* (BiGG ID: CYTBD, EC 1.10.3.10; BT\_3053, BT\_1209, and BT\_1210). Consistently, the model grew faster in presence of oxygen (Table S3a). Since the employed constraint-based modeling approach does not permit simulating enzyme inhibition or DNA damage due to oxygen exposure, we assumed strictly anaerobic conditions for all following simulations.

The model could not grow on cysteine as sole sulfur source. *In vivo*, cysteine can replace sulfide as sulfur source<sup>4</sup>. Sulfide is required for synthesis of methionine, S-adenosyl-L-methionine, and biotin. We added the cysteine desulphydrolase activity (BiGG ID: CYSDS), which is catalyzed by cystathionine beta-lyase (EC 4.4.1.8, BT\_2387 and BT\_1923). *B $\theta$ \_Seed\_v2* required N-acetyl-D-glucosamine. This metabolite has been reported to serve as sole carbon source<sup>26</sup>, but to be not required for growth *in vivo*. The N-acetyl-D-glucosamine synthesis from glucose requires either glucosamine-6-phosphate-acetyltransferase (EC 2.3.1.4) or glucosamine-1-phosphate-acetyltransferase (EC 2.3.1.157), but no gene could be found in *B. thetaiotaomicron*'s genome. We assumed the presence of the glucosamine-1-phosphate-acetyltransferase activity (BiGG ID: G1PACT).

These additions enabled *B $\theta$ \_Seed\_v2* to grow on anaerobic glucose minimal medium (Table S3a).

### *Addition of species-specific pathways*

As one would expect, organism-specific pathways were generally poorly represented in the draft reconstruction and thus were added manually based on thorough literature review.

### **Polysaccharide utilization**

*B. thetaiotaomicron*'s versatile carbohydrate utilization capacity was not well captured in *BΘ\_Seed\_2*. N-acetyl-D-galactosamine serves as sole carbon source *in vivo*<sup>27</sup>, but the corresponding pathway is not annotated in *B. thetaiotaomicron*'s genome. We assumed the presence of *E. coli*'s pathway<sup>28</sup> and the gaps in N-acetyl-D-galactosamine metabolism were putatively filled by adding the reactions of N-acetyl-D-galactosamine kinase (BiGG ID: ACGALK3), N-acetyl-D-galactosamine 6-phosphate amidohydrolase (EC 3.5.1.2, BiGG ID: AGDC2), Galactosamine-6-phosphate isomerase/ deamidase (BiGG ID: GALAM6PDA), and Tagatose-bisphosphate aldolase (EC 4.1.2.4, BiGG ID: TGBPA). A transport reaction for N-acetyl-D-galactosamine was also included.

Starch utilization is a well studied example of *B. thetaiotaomicron*'s polysaccharide degradation systems<sup>29</sup>. It involves the gene cluster of the starch utilization system (Sus), which consists of the outer-membrane proteins (SusC and SusD) that bind starch to the cell surface) and two starch-degrading  $\alpha$ -amylases (SusA and SusG). The appropriate reactions and GPR associations were added. The starch and pullulan molecules defined to consist of 1200 monosaccharide units. The amylose molecule consists of 300 monosaccharide units.

*B. thetaiotaomicron* utilizes a number of plant-derived polysaccharides including pectin, arabinan, and rhamnogalacturonan, as well as yeast-derived  $\alpha$ -mannan. Specific polysaccharide utilization loci (PULs) are upregulated during growth on these complex carbohydrates<sup>30</sup>. 61% of *B. thetaiotaomicron* glycosidases are predicted to be located in the extracellular space or in the periplasm<sup>31</sup>. *B. thetaiotaomicron* may also require susC/susD homologs. We added the corresponding reactions and GPR associations based on transcriptomic data<sup>30</sup>.

Degradation reactions of host-derived glycans were based on the glycans included in the human metabolic reconstruction Recon1<sup>32</sup>. Additionally, we accounted for human milk oligosaccharides (HMO). Chondroitin sulfate degradation is carried out by a PUL (BT\_3324 – BT\_3350)<sup>33</sup>, resulting in monosulfated disaccharides<sup>34</sup>. A susC and a susD homolog are needed for chondroitin sulfate utilization<sup>33</sup>. Further degradation involves sulfatases, which require sulfatase-maturing enzyme (SME) for functionality<sup>35</sup>, and at least two periplasmatic chondroitinases, which breaks down the desulfated disaccharides<sup>33</sup>. Hyaluronan degradation is also carried out by PUL (BT\_3324 – BT\_3350)<sup>33</sup> and may occur in a similar way. The first step in heparin degradation is carried out by heparin lyase I, which cleaves the glycosidic linkage to the nonreducing end of iduronate<sup>36</sup>. Further degradation may involve glucuronidase and alpha-N-acetylglucosaminidase. *B. thetaiotaomicron* utilizes host-derived mucin-type O-glycans, and a number of PULs, and susC/ susD homologs, are upregulated during utilization of these glycans<sup>33</sup>. HMO degradation pathways were constructed based on structural information for these oligosaccharides<sup>37, 38</sup>. *B. thetaiotaomicron* employs similar mechanisms as for mucus utilization to degrade HMOs, and several PULs, and susC/susD homologs, are upregulated during growth on HMOs<sup>39</sup>.

All carbohydrates that can serve as sole carbon sources are listed in Table S1.

### **Production of known secretion products**

The major fermentation products of *B. thetaiotaomicron* are acetate, propionate, succinate, CO<sub>2</sub>, and H<sub>2</sub><sup>40, 41</sup>. Minor secretion products include lactate, isovalerate, and isobutyrate<sup>40</sup>. Moreover, when L-fucose or L-rhamnose is fermented, 1,2-propanediol is formed<sup>42, 43</sup>. Isobutyrate and isovalerate are formed by the gut microbiota by an unknown degradation of valine and leucine, respectively<sup>44</sup>. A minor product of microbial protein degradation in the gut is isocaproate, which is formed by reduction of leucine<sup>45</sup>. It is not known if *B. thetaiotaomicron* produces isocaproate, but its inclusion was required for the putative leucine degradation pathway.

Phenylacetate is an end product of aromatic amino acid degradation in *B. thetaiotaomicron*<sup>46</sup>. The reversible reaction of the annotated phenylacetate-CoA ligase was added to *B $\theta$ \_Seed\_2* as well as a phenylpyruvate-dependent reaction of indolepyruvate ferredoxin oxidoreductase (EC 1.2.7.8, BiGG ID: IOR2, BT\_0429 and BT\_0430). Phenylpyruvate formation via phenylalanine transaminase (EC 2.6.1.58, PHETA1, BT\_0202 or BT\_3935) was already included in *B $\theta$ \_Seed\_2*.

Transport reactions were added for known secretion products metabolites (Table S2). The gene for succinate transport (BT\_2756) was included.

### ***Bile acid metabolism***

The human gut microbiota is well known to carry out chemical modifications of host-produced bile acids in the large intestine<sup>47</sup>. Different bile acid biotransformations are performed by different species. *B. thetaiotaomicron* possesses a bile acid hydrolase (BT\_1259 or BT\_2086), which degrades choloylglycine and choloyltaurine<sup>48</sup>, and a NAD-dependent 7 $\alpha$ -hydroxysteroid dehydrogenase (BT\_1911)<sup>47</sup>, which converts cholate to  $\alpha$ ,12 $\alpha$ -Dihydroxy-7-oxo-5 $\beta$ -cholanate.

### ***Lipopolysaccharide (LPS), capsular polysaccharide (CPS), and sphingolipid biosynthesis***

The LPS synthesis pathway was incomplete in *B $\theta$ \_Seed\_2* due to unknown genes. *B. thetaiotaomicron* synthesizes a LPS with similar structure to the LPS of the periodontal pathogen *Porphyromonas gingivalis*<sup>49</sup>. A metabolic reconstruction of *P. gingivalis* has been published<sup>50</sup>, whose LPS synthesis pathway was based on a metabolic reconstruction of *Helicobacter pylori*, iIT341<sup>51</sup>. Therefore, the LPS synthesis pathway of *B. thetaiotaomicron* was also partly based on *H. pylori* iIT341 but the reactions were modified to reflect structural properties of *B. thetaiotaomicron*'s LPS<sup>49, 52</sup>. CPS synthesis is mediated by eight CPS loci in the genome<sup>53</sup>. The exact structure of *B. thetaiotaomicron*'s CPS is unknown, however, it is thought to contain 2-aminoethylphosphonate<sup>54</sup>, CMP-2-Keto-3-deoxy-D-glycero-D-galactononic acid (CMP-KDN)<sup>55</sup>, and GDP-fucose<sup>56</sup>. *B. fragilis* and *B. thetaiotaomicron* can harvest L-fucose from host glycoproteins and incorporate it into their own surface CPSs through a mammalian-like pathway<sup>56</sup>. We included the reaction of the fucose-1-phosphate guanylyltransferase (EC 2.7.7.30, BiGG ID F1PGT, BT\_2128). We assumed a stoichiometric coefficient of one for each metabolite. An unusual trait of *B. thetaiotaomicron* is its ability to synthesize sphingolipids. The main sphingolipid types in *B. thetaiotaomicron* are ceramide-1-phosphoethanolamine and sphingomyelin<sup>57-59</sup>. Information on sphingolipid biosynthesis pathways in *Bacteroides* is sparse. A putative homolog of human serine C-palmitoyltransferase (EC 2.3.1.50) was identified in *B. thetaiotaomicron* (BT\_0870); however, no homologs of human 3-dehydrosphinganine reductase and ceramide synthase could be found<sup>60</sup>. Thus, sphingolipid synthesis may occur by a different mechanism in *Bacteroides* species from the one currently known. In the absence of other information, reactions involved in sphingolipid synthesis were taken from the human metabolic reconstruction<sup>32</sup> and modified based on available structural data. Species-specific lipids were then added to the biomass reaction.

### ***In silico gene essentiality analysis***

*In silico* single gene essentiality analysis was carried out using the COBRA Toolbox<sup>61</sup>. Three *in silico* growth conditions were considered: glucose minimal medium, tryptone-yeast extract-glucose medium, and rich medium. For the simulation of rich medium, uptake of every nutrient was allowed in unlimited amounts (i.e., the lower bounds on all exchange reactions were set to -1000 mmol g<sub>DW</sub><sup>-1</sup>.hr<sup>-1</sup> and the upper bounds to 1000 mmol g<sub>DW</sub><sup>-1</sup>.hr<sup>-1</sup>). For simulation of tryptone-yeast extract-glucose medium, yeast extract was assumed to consist of all metabolites included in the yeast reconstruction iMM904<sup>62</sup> that could also be transported

by iAH991. Furthermore, yeast  $\alpha$ -mannan (Metabolite ID: amannan140) was included. Tryptone was assumed to include all 20 amino acids. Simulation conditions and constraints are listed in Table S8.

In glucose minimal medium, 204/991 (20,6%) of the genes were essential, most of which belonged to the subsystems associated with *de novo* synthesis of biomass precursors (Figure S6). Carbohydrate metabolism makes up only 3% of essential genes. No genes in central metabolism (fermentation pathways and electron transport chain) and citric acid cycle were found to be essential *in silico* (Figure S6), highlighting the redundant nature of *B. thetaiotaomicron*'s energy and carbohydrate metabolic network. In rich medium, only 61/991 (6,2%) of the metabolic genes were essential.

To assess how well iAH991 can predict single gene essentiality for growth, we compared our predictions with experimental data reported in literature. We predicted correctly 11 out of 12 reported knockout growth phenotypes of *B. thetaiotaomicron*, or the closely related species *Bacteroides fragilis* (Table S14). iAH991 failed to predict growth on L-rhamnose as sole carbon source of the lactaldehyde reductase knockout (BT\_3767).

We also compared the gene essentiality reported in an *in vitro* transposon mutant study covering 78% of open reading frames in the *B. thetaiotaomicron* genome<sup>63</sup>. 75,1% (744/991) of the genes in iAH991 were captured in the transposon study, corresponding to 95 *in vitro* candidate essential (probability > 90%) and 649 unessential genes. We computed the *in silico* gene in anaerobic conditions on tryptone-yeast extract-glucose (TYG) medium. 93 of the 116 *in silico* essential and 651 of the 875 non-essential genes were captured by the transposon library. Overall, the model predicted correctly the essentiality for 44 genes and the non-essentiality for 600 genes. 49 predictions were false-positives, while 51 predictions were false-negatives. The model predicts thus gene essentiality with an accuracy of 86,6%.

#### *Rational and implementation of coupling constraints in the integrated model*

Using the integrated model setup (Figure 1a), we realized that unless additional constraints were implemented, we computed biologically implausible solutions, in which microbial or host reactions were active even though microbe, or the host, did not generate ATP or produce biomass. Also, if a reaction has a higher flux, than the ATP or biomass production should be higher, as more of the enzyme is required. Since most enzymes do not operate at saturation level<sup>64</sup>, our implementation of the reaction coupling sets bounds on the reaction ratio between each network reaction and the biomass reaction rather than to fix the ratio to a particular value (Figure S2). These constraints rendered the model's more realistic (Figure S3).

We performed a sensitivity analysis to investigate the effect of coupling coefficient  $c$  on the model's predictive potential. For the uncoupled model, a negatively linear relationship between the maximal possible growth rate of iSS1393 and of iAH991 was computed (Figure S3a), which corresponds to a competitive interaction. This is due to the fact that at maximal growth rate of the mouse model it profits by the presence of the *B. thetaiotaomicron* metabolic network, which is not utilized for *B. thetaiotaomicron* growth. With the coupling constraints in place, the mouse can still benefit from *B. thetaiotaomicron*'s metabolic network but now *B. thetaiotaomicron* has to grow to some extent to be able to provide metabolites to the mouse. Mutualism and competition, depending on the growth rate of both organisms, is captured by the integrated, coupled model. Increasing  $c$  causes an extension of the feasible solution space (Figure S4), and the relationship between the two biomass reactions becomes more linear. We employed  $c=400$  for all simulations in this work.

## Supplemental figures

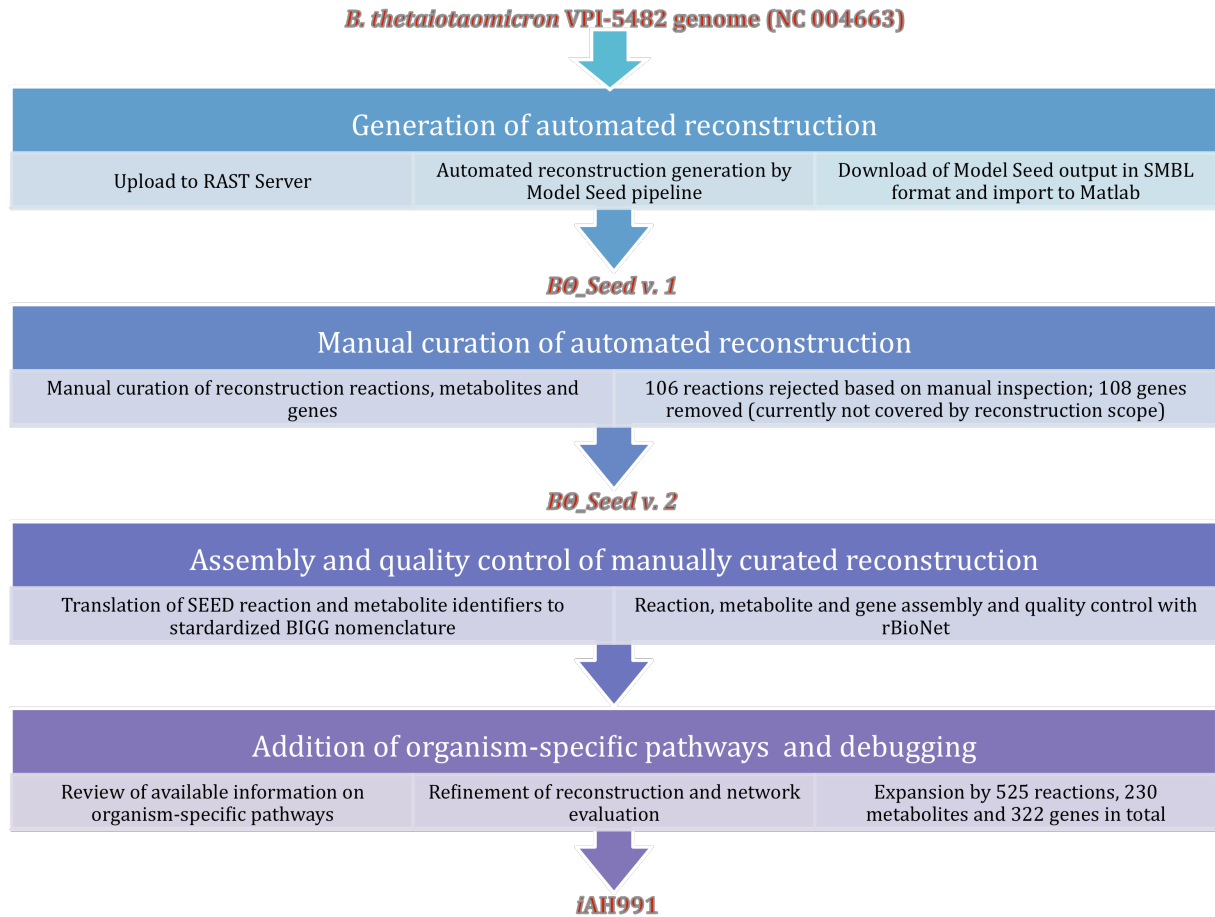

**Figure S1: Pipeline employed to build a high-quality metabolic reconstruction of *B. thetaiotaomicron* based on an automated draft reconstruction.** Shown is the reconstruction process starting from upload of the *B. thetaiotaomicron* VPI-5482 genome to the RAST server<sup>65</sup>. The automated draft reconstruction generated by Model Seed<sup>1</sup> was then subjected to several manual curation and expansion steps and underwent quality control in a reconstruction environment tool, rBioNet<sup>66</sup>.

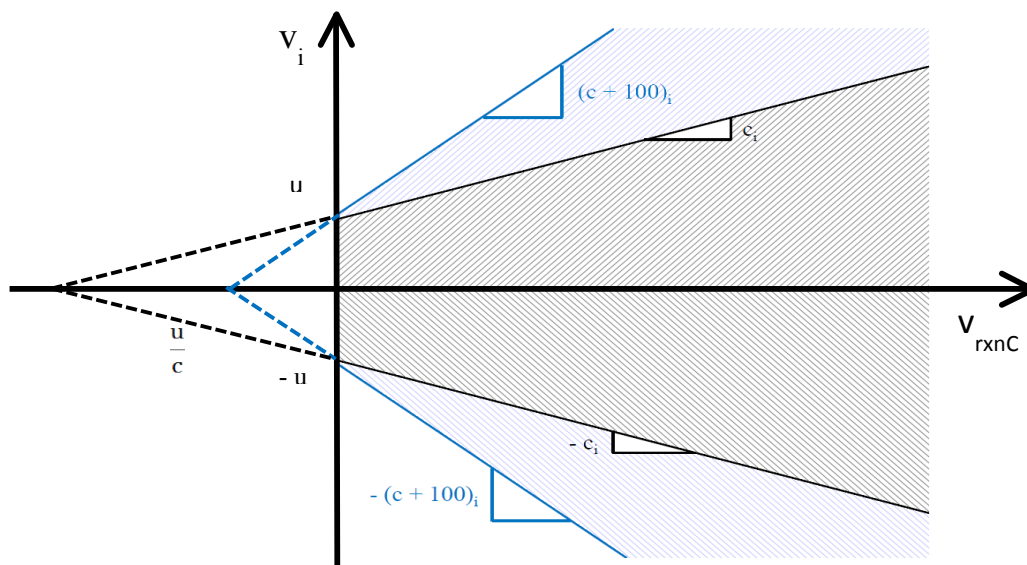

**Figure S2:** Schematic representation of the relationship between the fluxes  $v_i$  of coupled reactions, the flux  $v_{rxnC}$  of the specified reaction to which fluxes are coupled, the threshold  $u$  and the coupling factor  $c$ . The feasible solution space if the coupling factor  $c$  is implemented is indicated by grey diagonal lines. The expansion of the solution space if the value of  $c$  is raised by 100 is indicated by blue diagonal lines. The value for the threshold  $u$  is constant in our study.

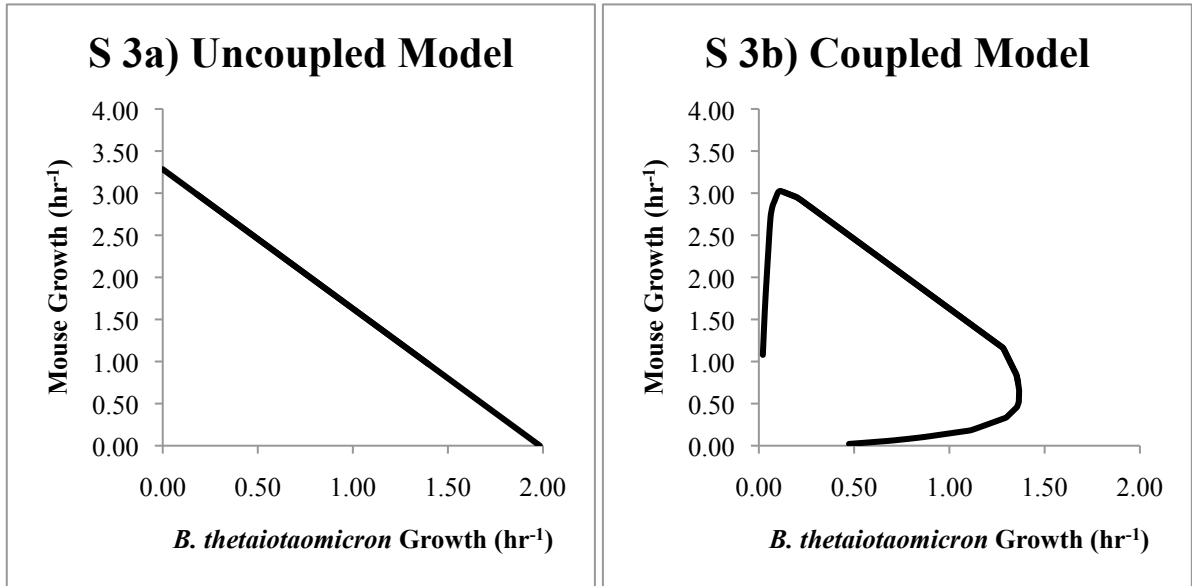

**Figure S3: Pareto optimality analysis of the joint model on Western diet before implementing coupling constraints (a) and with coupling constraints ( $c = 400$ ,  $u = 0.01$  mmol/g<sub>DW</sub>/hr) in place (b).**

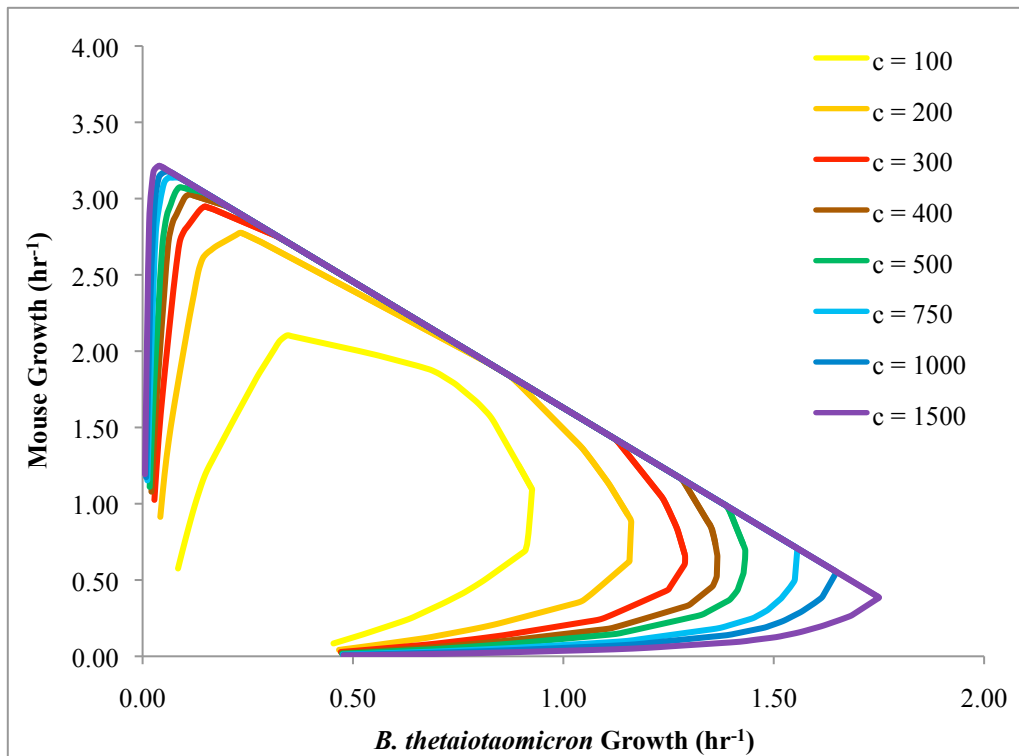

**Figure S4: Sensitivity analysis of coupling factor  $c$ .** The effect of varying  $c$  between 100 and 1500 is shown. The analysis was performed for the joint model while simulating growth on Western Diet and setting the threshold  $u$  to 0.01 mmol/g<sub>DW</sub>/hr.

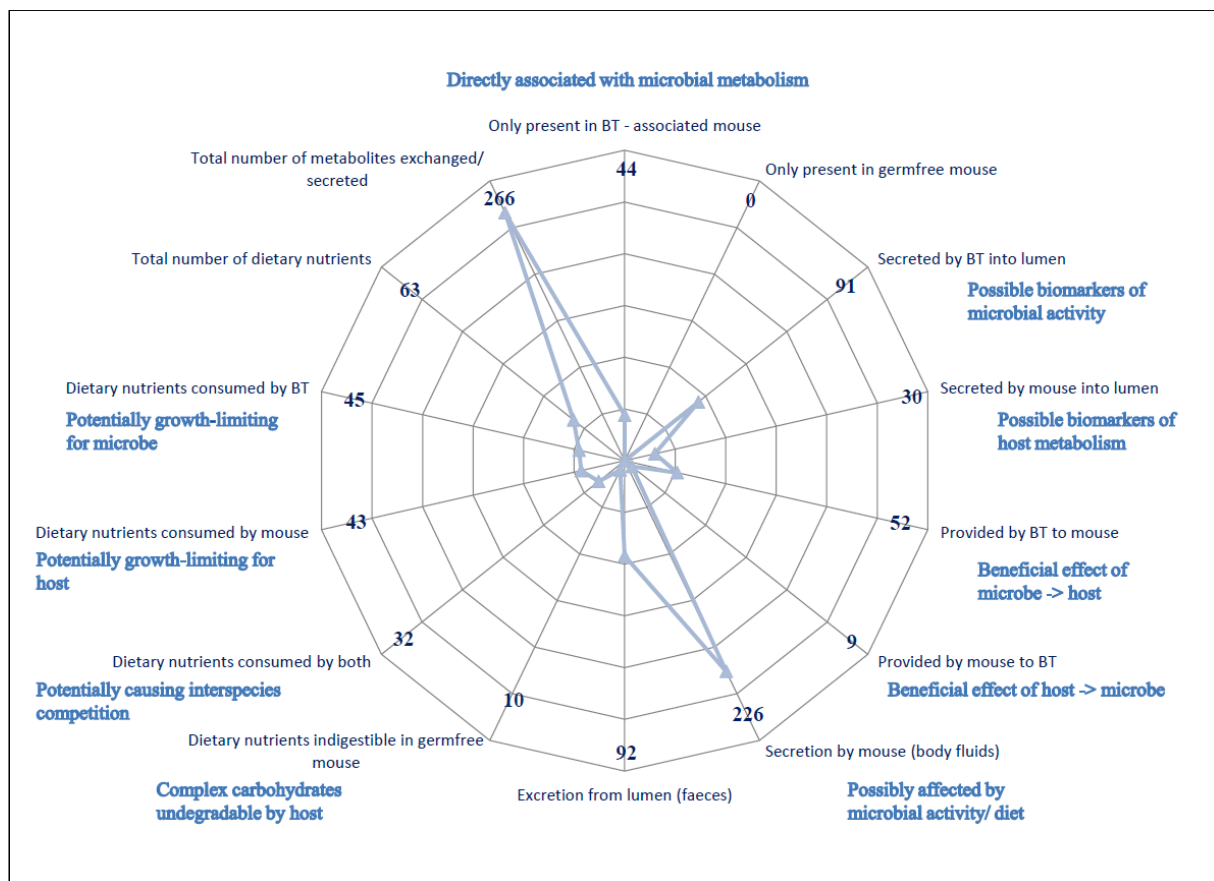

**Figure S5: Predicting the metabolome.** Metabolites exchanged in the joint *B. thetaiotaomicron* – mouse model classified by metabolic fate.

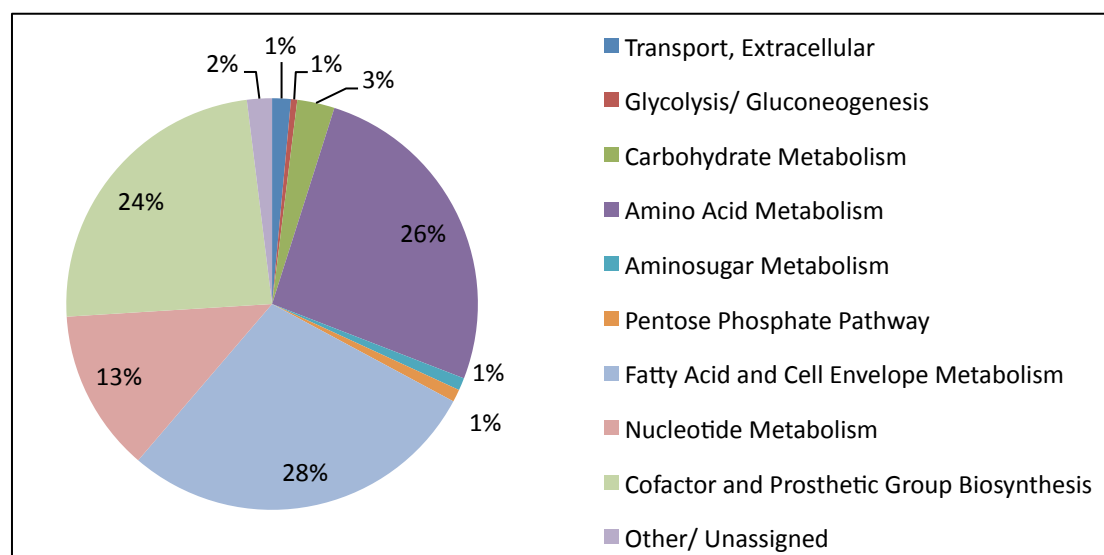

**Figure S6: Subsystem participation of iAH991 genes predicted to be essential on glucose minimal medium.**

## Supplemental tables

**Table S1: List of carbohydrates that can serve as sole carbon sources for iAH991, and supporting references.**

| Carbohydrate                      | BIGG ID:                                                                               | <i>B<math>\theta</math>_Seed_v1</i> | iAH991 | Reference |
|-----------------------------------|----------------------------------------------------------------------------------------|-------------------------------------|--------|-----------|
| <b>Monosaccharides</b>            |                                                                                        |                                     |        |           |
| D-glucose                         | glc-D                                                                                  | no                                  | yes    | 4         |
| D-mannose                         | man                                                                                    | no                                  | yes    | 67        |
| D-galactose                       | gal                                                                                    | no                                  | yes    | 67, 68    |
| D-fructose                        | fru                                                                                    | no                                  | yes    | 69        |
| D-xylose                          | xyl-D                                                                                  | no                                  | yes    | 67        |
| L-arabinose                       | ara-L                                                                                  | yes                                 | yes    | 67, 68    |
| N-acetylglucosamine               | acgam                                                                                  | no                                  | yes    | 26        |
| N-acetylgalactosamine             | acgal                                                                                  | no                                  | yes    | 27        |
| D-glucuronate                     | glcur                                                                                  | no                                  | yes    | 70        |
| D-galacturonate                   | galur                                                                                  | no                                  | yes    | 70        |
| D-glucosamine                     | gam                                                                                    | no                                  | yes    | 70        |
| L-fucose                          | fuc-L                                                                                  | no                                  | yes    | 70, 71    |
| L-rhamnose                        | rmn                                                                                    | no                                  | yes    | 42        |
| D-ribose                          | rib-D                                                                                  | no                                  | yes    | 30        |
| <b>Di-and oligosaccharides</b>    |                                                                                        |                                     |        |           |
| Trehalose                         | tre                                                                                    | no                                  | yes    | 40, 72    |
| Raffinose                         | raffin                                                                                 | no                                  | yes    | 40        |
| Melibiose                         | melib                                                                                  | no                                  | yes    | 73        |
| Maltose                           | malt                                                                                   | no                                  | yes    | 73        |
| Maltotriose                       | malttr                                                                                 | no                                  | yes    | 74        |
| Maltotetraose                     | maltttr                                                                                | no                                  | yes    | 74        |
| Maltopentose                      | maltpt                                                                                 | no                                  | yes    | 74        |
| Maltohexose                       | malthx                                                                                 | no                                  | yes    | 74        |
| Maltoheptaose                     | malthp                                                                                 | no                                  | yes    | 74        |
| Sucrose                           | sucr                                                                                   | no                                  | yes    | 69        |
| Kestose                           | kesto                                                                                  | no                                  | yes    | 69        |
| Kestotetraose                     | kestottr                                                                               | no                                  | yes    | 69        |
| Kestopentaose                     | kestopt                                                                                | no                                  | yes    | 69        |
| Levanbiose                        | levanb                                                                                 | no                                  | yes    | 69        |
| Levantriose                       | levanttr                                                                               | no                                  | yes    | 69        |
| Levantetraose                     | levantttr                                                                              | no                                  | yes    | 69        |
| Lactose                           | lcts                                                                                   | no                                  | yes    | 40        |
| Oligofructose                     | oligofru4                                                                              | no                                  | yes    | 75        |
| Human milk oligosaccharides (HMO) | 2fuclac, 3fuclac, lacdfucttr, lacndfuchx, lacnfucpt, lacnttr, neulacnttr, fucneulacnhx | no                                  | yes    | 39        |

|                                       |                                                                             |    |     |              |
|---------------------------------------|-----------------------------------------------------------------------------|----|-----|--------------|
| Stachyose                             | stys                                                                        | no | yes | 76           |
| Mannobiose                            | manb                                                                        | no | yes | 77           |
| Mannotriose                           | mantr                                                                       | no | yes | 77           |
| Mannotetraose                         | manttr                                                                      | no | yes | 77           |
| Mannopentaose                         | manpt                                                                       | no | yes | 77           |
| Chitobiose                            | chtbs                                                                       | no | yes | KEGG Pathway |
| <b>Polysaccharides</b>                |                                                                             |    |     |              |
| Amylose                               | amylose300                                                                  | no | yes | 70           |
| Starch (insoluble)                    | starch1200                                                                  | no | yes | 70           |
| Starch (human enzyme-accessible form) | strch1, strch2                                                              | no | yes | 70           |
| Pullulan                              | pullulan1200                                                                | no | yes | 73           |
| Dextran                               | dextran40                                                                   | no | yes | 70           |
| Pectin                                | pect                                                                        | no | yes | 70           |
| Larch arabinogalactan                 | arabinogal                                                                  | no | yes | 70           |
| Laminarin                             | lmn30                                                                       | no | yes | 70, 78       |
| Inulin                                | inulin                                                                      | no | yes | 30           |
| Levan                                 | levan1000                                                                   | no | yes | 69           |
| Glycogen                              | glycogen1500                                                                | no | yes | 72           |
| Chondroitin sulfate A                 | cspg_a                                                                      | no | yes | 70, 79       |
| Chondroitin sulfate B                 | cspg_b                                                                      | no | yes | 70, 79       |
| Chondroitin sulfate C                 | cspg_c                                                                      | no | yes | 70, 79       |
| Heparan sulfate                       | hspg                                                                        | no | yes | 33, 70       |
| Hyaluronan                            | ha                                                                          | no | yes | 33, 70       |
| PA6 (a N-glycan containing L-fucose)  | s2l2fn2m2masn                                                               | no | yes | 71           |
| Mucin-type O-glycans                  | fla, core4, core5, core7, core7, gncore1, gncore2, sTn_antigen, dsT_antigen | no | yes | 33, 70       |
| alpha-mannan (yeast)                  | amannan140                                                                  | no | yes | 30           |
| Homogalacturonan                      | homogal                                                                     | no | yes | 30           |
| Rhamnogalacturonan I                  | rhamnogalurI                                                                | no | yes | 30           |
| Rhamnogalacturonan II                 | rhamnogalurII                                                               | no | yes | 30           |
| Arabinan                              | arabinan101                                                                 | no | yes | 30           |
| Pectic galactan                       | pecticgal                                                                   | no | yes | 30           |

**Table S2: List of known secretion products captured by iAH991, and supporting references.**

a - KEGG Pathway, b - NCBI Entrez Gene.

| Secretion Product   | BiGG Identifier                | <i>B<math>\theta</math>_Seed_v1</i> | iAH991 | Ref.   | Comments                                                                                                                                                                                                               |
|---------------------|--------------------------------|-------------------------------------|--------|--------|------------------------------------------------------------------------------------------------------------------------------------------------------------------------------------------------------------------------|
| Acetate             | ac                             | no                                  | yes    | 72     |                                                                                                                                                                                                                        |
| Propionate          | ppa                            | no                                  | yes    | 72     |                                                                                                                                                                                                                        |
| Succinate           | succ                           | no                                  | yes    | 72     |                                                                                                                                                                                                                        |
| CO <sub>2</sub>     | co2                            | yes                                 | yes    | 41     |                                                                                                                                                                                                                        |
| H <sub>2</sub>      | h2                             | no                                  | yes    | 41     |                                                                                                                                                                                                                        |
| D-lactate           | lac-D                          | no                                  | yes    | 72     | Not determined in literature if <i>B. thetaiotaomicron</i> secretes L-lactate or D-lactate, or both.                                                                                                                   |
| L-lactate           | lac-L                          | no                                  | yes    | 72     | Not determined in literature if <i>B. thetaiotaomicron</i> secretes L-lactate or D-lactate, or both.                                                                                                                   |
| Isovalerate         | isoval                         | no                                  | yes    | 72     |                                                                                                                                                                                                                        |
| Isobutyrate         | isobut                         | no                                  | yes    | 72     |                                                                                                                                                                                                                        |
| Isocaproate         | isocapr                        | no                                  | yes    | 45     | Secreted by gut microbiota; not known if <i>B. thetaiotaomicron</i> in particular produces this metabolite. Needed for leucine degradation pathway to be mass and charge balanced.                                     |
| Phenylacetate       | pac                            | no                                  | yes    | 46     |                                                                                                                                                                                                                        |
| Pyruvate            | pyr                            | no                                  | yes    | 6      |                                                                                                                                                                                                                        |
| Acetol              | acetol                         | no                                  | yes    | 6      |                                                                                                                                                                                                                        |
| Methylglyoxal       | mthgxl                         | no                                  | yes    | 6      |                                                                                                                                                                                                                        |
| Formate             | for                            | no                                  | yes    | 78     |                                                                                                                                                                                                                        |
| Ethanol             | etoh                           | no                                  | yes    | 80     |                                                                                                                                                                                                                        |
| Putrescine          | ptrc                           | no                                  | yes    | 81     |                                                                                                                                                                                                                        |
| Spermidine          | spmd                           | no                                  | yes    | 81     |                                                                                                                                                                                                                        |
| (R)-1,2-propanediol | 12ppd-R                        | no                                  | yes    | 42, a  | <i>B. thetaiotaomicron</i> possesses at least one additional route for 1,2-propanediol production apart from lactaldehyde reductase. It is assumed that 1,2-propanediol formation occurs via methylglyoxal and acetol. |
| (S)-1,2-propanediol | 12ppd-S                        | no                                  | yes    | 42, 43 | Only produced during growth on L-rhamnose or L-fucose.                                                                                                                                                                 |
| Menaquinones        | mqn7, mqn8, mqn9, mqn10, mqn11 | no                                  | yes    | 23, 82 |                                                                                                                                                                                                                        |

|                |        |    |     |               |                                                                                                                                                  |
|----------------|--------|----|-----|---------------|--------------------------------------------------------------------------------------------------------------------------------------------------|
| 1,2-Ethenediol | 12ethd | no | yes | a             | Production of this metabolite is predicted by KEGG Pathway <sup>17</sup> . Last checked on 28.10.11.                                             |
| Urea           | urea   | no | yes | b             | No biochemical evidence for urea excretion is available, but urea cycle is annotated in <i>B. thetaiotaomicron</i> genome.                       |
| Methanol       | meoh   | no | yes | <sup>22</sup> | Only produced from one reaction in the biotin biosynthesis pathway. Assumed to be excreted since no further metabolic fate of methanol is known. |

**Table S3: Growth rates and secretion product amounts produced by iAH991 on several carbon sources, and comparison with available experimental data.**

**a) Growth rates.** <sup>a</sup> Type of mucin O-glycan is not specified in experimental data. <sup>b</sup> Type of chondroitin sulfate is not specified in experimental data. <sup>c</sup> Previous studies report that *B. thetaiotaomicron* grows on laminarin (see Table S1). Simulation conditions are reported in Table S8.

| Carbon Source<br>(uptake rate scaled to 10 mmol.g <sub>DW</sub> <sup>-1</sup> .hr <sup>-1</sup> 6 carbon units) | Growth rate <i>in silico</i> (hr <sup>-1</sup> ) | Growth rate <i>in vivo</i> (hr <sup>-1</sup> ) | Growth rate <i>in vivo</i> (ΔA <sub>600</sub> /h) <sup>30</sup> |                                  |
|-----------------------------------------------------------------------------------------------------------------|--------------------------------------------------|------------------------------------------------|-----------------------------------------------------------------|----------------------------------|
| Arabinose                                                                                                       | 0.23                                             | 0.10 <sup>67</sup>                             | 0.031                                                           | Monosaccharides                  |
| Fructose                                                                                                        | 0.24                                             | 0.39 <sup>69</sup>                             | 0.073                                                           |                                  |
| Fucose                                                                                                          | 0.0012                                           |                                                | 0.024                                                           |                                  |
| Galactose                                                                                                       | 0.24                                             | 0.38 <sup>67</sup>                             | 0.038                                                           |                                  |
| Galacturonate                                                                                                   | 0.14                                             |                                                | 0.021                                                           |                                  |
| Glucosamine                                                                                                     | 0.24                                             |                                                | 0.008                                                           |                                  |
| Glucose                                                                                                         | 0.24                                             | 0.42 <sup>67</sup>                             | 0.067                                                           |                                  |
| Glucose + 1 mmol.g <sub>DW</sub> <sup>-1</sup> .hr <sup>-1</sup> oxygen                                         | 0.27                                             |                                                |                                                                 |                                  |
| Glucuronate                                                                                                     | 0.14                                             |                                                | 0.024                                                           |                                  |
| Mannose                                                                                                         | 0.16                                             |                                                | 0.103                                                           |                                  |
| N-acetylgalactosamine                                                                                           | 0.17                                             |                                                | 0.007                                                           |                                  |
| N-acetylglucosamine                                                                                             | 0.18                                             |                                                | 0.066                                                           |                                  |
| N-acetylneuraminate                                                                                             | 0                                                |                                                | 0                                                               |                                  |
| Rhamnose                                                                                                        | 0.0012                                           |                                                | 0.033                                                           |                                  |
| Ribose                                                                                                          | 0.23                                             |                                                | 0.040                                                           |                                  |
| Xylose                                                                                                          | 0.23                                             | 0.16 <sup>67</sup>                             | 0.049                                                           |                                  |
| Arabinan                                                                                                        | 0.23                                             |                                                | 0.037                                                           | Pectins                          |
| Arabinogalactan                                                                                                 | 0.23                                             |                                                | 0.045                                                           |                                  |
| Homogalacturonan                                                                                                | 0.12                                             |                                                | 0.066                                                           |                                  |
| Pectic galactan                                                                                                 | 0.22                                             |                                                | 0.093                                                           |                                  |
| Rhamnogalacturonan I                                                                                            | 0.13                                             |                                                | 0.027                                                           |                                  |
| Rhamnogalacturonan II                                                                                           | 0.08                                             |                                                | 0.033                                                           |                                  |
| Amylopectin                                                                                                     | 0.25                                             |                                                | 0.075/<br>0.0056                                                | Starch, fructan<br>and α-glucans |
| Pullulan                                                                                                        | 0.25                                             |                                                | 0.063                                                           |                                  |
| Dextran                                                                                                         | 0.26                                             |                                                | 0.108                                                           |                                  |
| Inulin                                                                                                          | 0.24                                             |                                                | 0.005                                                           |                                  |
| Levan                                                                                                           | 0.24                                             |                                                | 0.036                                                           |                                  |
| F1alpha (Gal-beta-1,4-GlcNAc-beta-1,6-GalNAc-alpha-1-O-Ser/Thr)                                                 | 0.15                                             |                                                | 0.015 <sup>a</sup>                                              | Mucin-type O-glycans             |
| Core 4 ([GlcNAc-beta-1,6-], [GlcNAc-beta-1,3] GalNAc-alpha-1-O-Ser/Thr)                                         | 0.12                                             |                                                | 0.015 <sup>a</sup>                                              |                                  |
| Core 5 (GalNAc-alpha-1,3-GalNAc-alpha-1-O-Ser/Thr)                                                              | 0.11                                             |                                                | 0.015 <sup>a</sup>                                              |                                  |
| Core 7 (GalNAc-alpha-1,6-GalNAc-alpha-1-O-Ser/Thr)                                                              | 0.11                                             |                                                | 0.015 <sup>a</sup>                                              |                                  |
| Core 8 (Gal-alpha-1,3-GalNAc-alpha-1-O-Ser/Thr)                                                                 | 0.17                                             |                                                | 0.015 <sup>a</sup>                                              |                                  |

|                                                                                                        |      |  |                    |                         |
|--------------------------------------------------------------------------------------------------------|------|--|--------------------|-------------------------|
| 1-O-Ser/Thr)                                                                                           |      |  |                    |                         |
| GlcNAc-alpha-1,4-Core 1 (GlcNAc-alpha-1,4-Gal-beta-1,3-GalNAc-alpha-1-O-Ser/Thr)                       | 0.15 |  | 0.015 <sup>a</sup> |                         |
| GlcNAc-alpha-1,4-Core 2 ([GlcNAc-beta-1,6-], [GlcNAc-alpha-1,4-Gal-beta-1,3-]GalNAc-alpha-1-O-Ser/Thr) | 0.14 |  | 0.015 <sup>a</sup> |                         |
| Sialyl-Tn antigen (NeuAc-alpha-2,6-GalNAc-alpha-1-O-Ser/Thr)                                           | 0    |  | 0.015 <sup>a</sup> |                         |
| Disialyl-T antigen ([NeuAc-alpha-2,6-], [NeuAc-alpha-2,3-Gal-beta-1,3-]GalNAc-alpha-1-O-Ser/Thr)       | 0.01 |  | 0.015 <sup>a</sup> |                         |
| $\alpha$ -mannan                                                                                       | 0.16 |  | 0.035              | Host-derived<br>glycans |
| Chondroitin sulfate A                                                                                  | 0.05 |  | 0.065 <sup>b</sup> |                         |
| Chondroitin sulfate B                                                                                  | 0.02 |  | 0.065 <sup>b</sup> |                         |
| Chondroitin sulfate                                                                                    | 0.05 |  | 0.065 <sup>b</sup> |                         |
| Hyaluronan                                                                                             | 0.13 |  | 0.125              |                         |
| Heparin                                                                                                | 0.11 |  | 0.025              |                         |
| Glycogen                                                                                               | 0.25 |  | 0.050              |                         |
| Laminarin <sup>c</sup>                                                                                 | 0.23 |  | 0                  | Other                   |
| Cellobiose                                                                                             | 0    |  | 0                  |                         |

**b) Secretion product flux rates.** *In silico* secretion production rates are given in mmol.g<sub>DW</sub><sup>-1</sup>.hr<sup>-1</sup>. Negative fluxes equal uptake. n.r. = not reported.

| Carbon Source<br>( <i>in silico</i> uptake rate<br>10 mmol.g <sub>DW</sub> <sup>-1</sup> .hr <sup>-1</sup> ) | Acetate       | Propionate | Succinate  | CO <sub>2</sub> | Hydrogen |
|--------------------------------------------------------------------------------------------------------------|---------------|------------|------------|-----------------|----------|
| <b>Glucose</b>                                                                                               |               |            |            |                 |          |
| <i>in silico</i>                                                                                             | 5.56          | 0 to 8.95  | 0 to 8.95  | -1.53 to 7.41   | 2.10     |
| <i>in vivo</i> <sup>26</sup>                                                                                 | 4.2 mM        | 0.8 mM     | 4.8 mM     | n.r.            | n.r.     |
| <b>N-acetylglucosamine</b>                                                                                   |               |            |            |                 |          |
| <i>in silico</i>                                                                                             | 8.10 to 12.63 | 0 to 14.56 | 0 to 14.56 | -5.82 to 8.75   | < 0.001  |
| <i>in vivo</i> <sup>26</sup>                                                                                 | 12.6 mM       | 0.2 mM     | 3.6 mM     | n.r.            | n.r.     |
| <b>Glucuronate</b>                                                                                           |               |            |            |                 |          |
| <i>in silico</i>                                                                                             | 7.72 to 8.16  | 0 to 7.66  | 0 to 7.66  | 7.60 to 14.66   | < 0.001  |
| <i>in vivo</i> <sup>26</sup>                                                                                 | 8.6 mM        | 0.7 mM     | 0.2 mM     | n.r.            | n.r.     |
| <b>Fructose</b>                                                                                              |               |            |            |                 |          |
| <i>in silico</i>                                                                                             | 5.56          | 0 to 8.95  | 0 to 8.95  | -1.53 to 7.41   | 2.10     |
| <i>in vivo</i> <sup>75</sup>                                                                                 | 3.4 g/l       | 0 g/l      | 8.4 g/l    | n.r.            | n.r.     |

**Table S6: Inborn errors of metabolism (IEMs) predicted to be lethal *in silico* on a Western Diet for the germfree mouse model.**

| Disease                                  | NCBI Gene ID |       | Lethality <i>in silico</i>                                                         | Lethality <i>in vivo</i>                                               | Ref.                 |
|------------------------------------------|--------------|-------|------------------------------------------------------------------------------------|------------------------------------------------------------------------|----------------------|
|                                          | Mouse        | Human |                                                                                    |                                                                        |                      |
| AICA-ribosiduria                         | 108147       | 471   | Germfree mouse: lethal<br><i>B<math>\theta</math></i> -associated mouse: nonlethal | Human: not lethal<br>Mouse: not known                                  | OMIM: 608688, 83     |
| Conradi-Hunermann syndrome               | 13595        | 10682 | Lethal in <i>B<math>\theta</math></i> -associated mouse and germfree mouse         | Human: not lethal<br>Mouse: lethal in homozygous males (X-linked gene) | OMIM: 302960, 84, 85 |
| D-bifunctional protein deficiency (DBPD) | 15488        | 3295  | Lethal in <i>B<math>\theta</math></i> -associated mouse and germfree mouse         | Human: lethal<br>Mouse: pre-/ peri-/ postlethal                        | OMIM: 261515, 86     |
| Desmosterolosis                          | 74754        | 1718  | Lethal in <i>B<math>\theta</math></i> -associated mouse and germfree mouse         | Human: Usually lethal with occasional mild cases<br>Mouse: lethal      | OMIM: 602398, 87, 88 |
| Dihydrofolate reductase deficiency       | 13361        | 1719  | Lethal in <i>B<math>\theta</math></i> -associated mouse and germfree mouse         | Human: Usually lethal with occasional mild cases<br>Mouse: lethal      | OMIM: 126060, 89, 90 |
| Lathosterolosis                          | 235293       | 6309  | Lethal in <i>B<math>\theta</math></i> -associated mouse and germfree mouse         | Human: not lethal<br>Mouse lethal                                      | OMIM: 607330, 91, 92 |
| Mevalonic aciduria                       | 17855        | 4598  | Lethal in <i>B<math>\theta</math></i> -associated mouse and germfree mouse         | Human: not lethal<br>Mouse: not known                                  | OMIM: 251170, 93     |
| Orotic aciduria                          | 22247        | 7372  | Germfree mouse: lethal<br><i>B<math>\theta</math></i> -associated mouse: nonlethal | Human: not lethal<br>Mouse: not known                                  | OMIM: 258900, 94     |
| Ribose 5-phosphate isomerase deficiency  | 19895        | 22934 | Germfree mouse: lethal<br><i>B<math>\theta</math></i> -associated mouse: nonlethal | Human: not lethal<br>Mouse: not known                                  | OMIM: 608611, 95     |
| Smith-Lemli-Opitz syndrome               | 13360        | 1717  | Lethal in <i>B<math>\theta</math></i> -associated mouse and germfree mouse         | Human : not lethal<br>Mouse: lethal                                    | OMIM: 270400, 96     |

**Table S13: Databases used to generate a knowledge base of *B. theta*taomicron.**

| <b>Name</b>      | <b>Link</b>                                                                       |
|------------------|-----------------------------------------------------------------------------------|
| NCBI Entrez Gene | <a href="http://www.ncbi.nlm.nih.gov/gene">http://www.ncbi.nlm.nih.gov/gene</a>   |
| The SEED         | <a href="http://theseed.uchicago.edu/FIG/">http://theseed.uchicago.edu/FIG/</a>   |
| The SEED Viewer  | <a href="http://seed-viewer.theseed.org/">http://seed-viewer.theseed.org/</a>     |
| KEGG             | <a href="http://www.genome.jp/kegg/">http://www.genome.jp/kegg/</a>               |
| UniProt          | <a href="http://www.uniprot.org/">http://www.uniprot.org/</a>                     |
| TransportDB      | <a href="http://www.membranetransport.org/">http://www.membranetransport.org/</a> |
| BIGG Database    | <a href="http://bigg.ucsd.edu/">http://bigg.ucsd.edu/</a>                         |

**Table S14: Knockout strains of *B. thetaiotaomicron* reported in literature, and comparison with predictions by iAH991.**

| Deleted gene                                       | Growth conditions                                                 | Growth <i>in vivo</i>                         | Growth <i>in silico</i> | Ref.   |
|----------------------------------------------------|-------------------------------------------------------------------|-----------------------------------------------|-------------------------|--------|
| BT_3763 - BT_3767                                  | L-rhamnose as sole carbon source                                  | no                                            | no                      | 42     |
| BT_3763 - BT_3767                                  | Glucose minimal medium                                            | yes                                           | yes                     | 42     |
| BT_3767                                            | L-rhamnose as sole carbon source                                  | yes, reduced levels of 1,2-propanediol formed | no                      | 42     |
| BT_3717                                            | Glucose minimal medium                                            | no                                            | no                      | 161    |
| BT_3717                                            | Glucose minimal medium with L-arginine supply                     | yes                                           | yes                     | 161    |
| SusC (BT_3702) or SusD (BT_3701) or SusG (BT_3698) | Maltose or maltotriose as sole carbon source                      | yes                                           | yes                     | 29, 97 |
| SusC (BT_3702) or SusD (BT_3701) or SusG (BT_3698) | Starch as sole carbon source                                      | no                                            | no                      | 29, 97 |
| SusG (BT_3698)                                     | Maltoheptaose as sole carbon source                               | yes                                           | yes                     | 29     |
| SusC (BT_3702) or SusD (BT_3701)                   | Maltoheptaose as sole carbon source                               | no                                            | no                      | 29, 97 |
| BT_1663 or BT_4689                                 | Pullulan as sole carbon source                                    | yes                                           | yes                     | 98     |
| BT_0238                                            | Chondroitin sulfate A, B or C as sole carbon source               | no                                            | no                      | 35     |
| BT_0238                                            | Glucose minimal medium                                            | yes                                           | yes                     | 35     |
| csuF (BT_3332)                                     | Chondroitin sulfate A, B or C as sole carbon source               | no                                            | no                      | 99     |
| csuF (BT_3332)                                     | Sulfated disaccharides as sole carbon source                      | yes                                           | yes                     | 99     |
| BT_2970                                            | Glucose minimal medium                                            | yes                                           | yes                     | 100    |
| BT_1760                                            | Levan as sole carbon source                                       | no                                            | no                      | 69     |
| BT_1760                                            | Glucose, fructose, sucrose or oligofructose as sole carbon source | yes                                           | yes                     | 69     |

<sup>1</sup> determined for *B. fragilis*

## Supplemental References

1. Henry CS, DeJongh M, Best AA, Frybarger PM, Linsay B, Stevens RL. High-throughput generation, optimization and analysis of genome-scale metabolic models. *Nat Biotechnol* 2010; 28:977-82.
2. Thiele I, Palsson BO. A protocol for generating a high-quality genome-scale metabolic reconstruction. *Nature protocols* 2010; 5:93-121.
3. Schellenberger J, Park JO, Conrad TM, Palsson BO. BiGG: a Biochemical Genetic and Genomic knowledgebase of large scale metabolic reconstructions. *BMC Bioinformatics* 2010; 11:213.
4. Varel VH, Bryant MP. Nutritional features of *Bacteroides fragilis* subsp. *fragilis*. *Appl Microbiol* 1974; 28:251-7.
5. Caldwell DR, Arcand C. Inorganic and metal-organic growth requirements of the genus *Bacteroides*. *Journal of bacteriology* 1974; 120:322-33.
6. Pan N, Imlay JA. How does oxygen inhibit central metabolism in the obligate anaerobe *Bacteroides thetaiotaomicron*. *Molecular Microbiology* 2001; 39:1562-71.
7. Harris MA, Reddy CA. Hydrogenase activity and the H<sub>2</sub>-fumarate electron transport system in *Bacteroides fragilis*. *Journal of bacteriology* 1977; 131:922-8.
8. Macy J, Probst I, Gottschalk G. Evidence for cytochrome involvement in fumarate reduction and adenosine 5'-triphosphate synthesis by *Bacteroides fragilis* grown in the presence of hemin. *Journal of bacteriology* 1975; 123:436-42.
9. Baughn AD, Malamy MH. The essential role of fumarate reductase in haem-dependent growth stimulation of *Bacteroides fragilis*. *Microbiology* 2003; 149:1551-8.
10. Baughn AD, Malamy MH. The strict anaerobe *Bacteroides fragilis* grows in and benefits from nanomolar concentrations of oxygen. *Nature* 2004; 427:441-4.
11. Shah HN, Collins MD. Fatty acid and isoprenoid quinone composition in the classification of *Bacteroides melaninogenicus* and related taxa. *J Appl Bacteriol* 1980; 48:75-87.
12. Kanehisa M, Araki M, Goto S, Hattori M, Hirakawa M, Itoh M, et al. KEGG for linking genomes to life and the environment. *Nucleic Acids Res* 2008; 36:D480-4.
13. Macy JM, Ljungdahl LG, Gottschalk G. Pathway of succinate and propionate formation in *Bacteroides fragilis*. *Journal of bacteriology* 1978; 134:84-91.
14. Shah HN, Williams RA. Dehydrogenase patterns in the taxonomy of *Bacteroides*. *J Gen Microbiol* 1982; 128:2955-65.
15. Baughn AD, Malamy MH. A mitochondrial-like aconitase in the bacterium *Bacteroides fragilis*: Implications for the evolution of the mitochondrial Krebs cycle. *Proceedings of the National Academy of Sciences of the United States of America* 2002; 99:4662-7.
16. Shi DH, Morizono H, Cabrera-Luque J, Yu XL, Roth L, Malamy MH, et al. Structure and catalytic mechanism of a novel N-succinyl-L-ornithine transcarbamylase in arginine biosynthesis of *Bacteroides fragilis*. *Journal of Biological Chemistry* 2006; 281:20623-31.
17. Kanehisa M, Araki M, Goto S, Hattori M, Hirakawa M, Itoh M, et al. KEGG for linking genomes to life and the environment. *Nucleic Acids Research* 2008; 36:D480-4.
18. Macfarlane GT, Cummings JH, Allison C. Protein degradation by human intestinal bacteria. *J Gen Microbiol* 1986; 132:1647-56.
19. Vukelic B, Salopek-Sondi B, Spoljaric J, Saldljic I, Mestrovic N, Agic D, et al. Reactive cysteine in the active-site motif of *Bacteroides thetaiotaomicron* dipeptidyl peptidase III is a regulatory residue for enzyme activity. *Biol Chem* 2012; 393:37-46.
20. Wollenweber HW, Rietschel ET, Hofstad T, Weintraub A, Lindberg AA. Nature, type of linkage, quantity, and absolute configuration of (3-hydroxy) fatty acids in lipopolysaccharides from *Bacteroides fragilis* NCTC 9343 and related strains. *Journal of bacteriology* 1980; 144:898-903.

21. Mayberry WR. Hydroxy fatty acids in *Bacteroides* species: D-(-)-3-hydroxy-15-methylhexadecanoate and its homologs. *Journal of bacteriology* 1980; 143:582-7.
22. Lin S, Hanson RE, Cronan JE. Biotin synthesis begins by hijacking the fatty acid synthetic pathway. *Nature Chemical Biology* 2010; 6:682-8.
23. Shearer MJ, Newman P. Metabolism and cell biology of vitamin K. *Thromb Haemost* 2008; 100:530-47.
24. Lewis NE, Nagarajan H, Palsson BO. Constraining the metabolic genotype-phenotype relationship using a phylogeny of in silico methods. *Nature reviews* 2012; 10:291-305.
25. Gudmundsson S, Thiele I. Computationally efficient flux variability analysis. *BMC Bioinformatics* 2010; 11:489.
26. Kotarski SF, Salyers AA. Effect of Long Generation Times on Growth of *Bacteroides*-*Thetaiotaomicron* in Carbohydrate-Limited Continuous Culture. *Journal of bacteriology* 1981; 146:853-60.
27. Salyers AA, Pajeau M, McCarthy RE. Importance of Mucopolysaccharides as Substrates for *Bacteroides*-*Thetaiotaomicron* Growing in Intestinal Tracts of Exgerm-Free Mice. *Applied and environmental microbiology* 1988; 54:1970-6.
28. Brinkkotter A, Kloss H, Alpert C, Lengeler JW. Pathways for the utilization of N-acetyl-galactosamine and galactosamine in *Escherichia coli*. *Molecular Microbiology* 2000; 37:125-35.
29. Cho KH, Salyers AA. Biochemical analysis of interactions between outer membrane proteins that contribute to starch utilization by *Bacteroides thetaiotaomicron*. *Journal of bacteriology* 2001; 183:7224-30.
30. Martens EC, Lowe EC, Chiang H, Pudlo NA, Wu M, McNulty NP, et al. Recognition and degradation of plant cell wall polysaccharides by two human gut symbionts. *PLoS Biol* 2011; 9:e1001221.
31. Xu J, Bjursell MK, Himrod J, Deng S, Carmichael LK, Chiang HC, et al. A genomic view of the human-*Bacteroides thetaiotaomicron* symbiosis. *Science* 2003; 299:2074-6.
32. Duarte NC, Becker SA, Jamshidi N, Thiele I, Mo ML, Vo TD, et al. Global reconstruction of the human metabolic network based on genomic and bibliomic data. *Proceedings of the National Academy of Sciences of the United States of America* 2007; 104:1777-82.
33. Martens EC, Chiang HC, Gordon JI. Mucosal glycan foraging enhances fitness and transmission of a saccharolytic human gut bacterial symbiont. *Cell Host Microbe* 2008; 4:447-57.
34. Zhang Z, Park Y, Kemp MM, Zhao W, Im AR, Shaya D, et al. Liquid chromatography-mass spectrometry to study chondroitin lyase action pattern. *Anal Biochem* 2009; 385:57-64.
35. Benjdia A, Martens EC, Gordon JI, Berteau O. Sulfatases and a radical AdoMet enzyme are key for mucosal glycan foraging and fitness of a prominent human gut *Bacteroides*. *Journal of Biological Chemistry* 2011.
36. Han YH, Garron ML, Kim HY, Kim WS, Zhang ZQ, Ryu KS, et al. Structural Snapshots of Heparin Depolymerization by Heparin Lyase I. *Journal of Biological Chemistry* 2009; 284:34019-27.
37. Zivkovic AM, German JB, Lebrilla CB, Mills DA. Human milk glycomiome and its impact on the infant gastrointestinal microbiota. *Proc Natl Acad Sci U S A* 2011; 108 Suppl 1:4653-8.
38. Chaturvedi P, Warren CD, Altaye M, Morrow AL, Ruiz-Palacios G, Pickering LK, et al. Fucosylated human milk oligosaccharides vary between individuals and over the course of lactation. *Glycobiology* 2001; 11:365-72.
39. Marcobal A, Barboza M, Sonnenburg ED, Pudlo N, Martens EC, Desai P, et al. *Bacteroides* in the infant gut consume milk oligosaccharides via mucus-utilization pathways. *Cell Host Microbe* 2011; 10:507-14.

40. Krieg NR. Bergey's manual of systematic bacteriology, 2nd ed., volume 4. New York: Springer, 2010.
41. Rey FE, Faith JJ, Bain J, Muehlbauer MJ, Stevens RD, Newgard CB, et al. Dissecting the in vivo metabolic potential of two human gut acetogens. *Journal of Biological Chemistry* 2010; 285:22082-90.
42. Patel EH, Paul LV, Patrick S, Abratt VR. Rhamnose catabolism in *Bacteroides thetaiotaomicron* is controlled by the positive transcriptional regulator RhaR. *Res Microbiol* 2008; 159:678-84.
43. Louis P, Scott KP, Duncan SH, Flint HJ. Understanding the effects of diet on bacterial metabolism in the large intestine. *J Appl Microbiol* 2007; 102:1197-208.
44. Zarling EJ, Ruchim MA. Protein origin of the volatile fatty acids isobutyrate and isovalerate in human stool. *J Lab Clin Med* 1987; 109:566-70.
45. Macfarlane GT, Gibson GR, Beatty E, Cummings JH. Estimation of Short-Chain Fatty-Acid Production from Protein by Human Intestinal Bacteria Based on Branched-Chain Fatty-Acid Measurements. *Fems Microbiol Ecol* 1992; 101:81-8.
46. Van der Meulen R, Camu N, Van Vooren T, Heymans C, De Vuyst L. In vitro kinetic analysis of carbohydrate and aromatic amino acid metabolism of different members of the human colon. *Int J Food Microbiol* 2008; 124:27-33.
47. Ridlon JM, Kang DJ, Hylemon PB. Bile salt biotransformations by human intestinal bacteria. *J Lipid Res* 2006; 47:241-59.
48. Stellwag EJ, Hylemon PB. Purification and Characterization of Bile-Salt Hydrolase from *Bacteroides-Fragilis* Subsp *Fragilis*. *Biochimica et biophysica acta* 1976; 452:165-76.
49. Berezow AB, Ernst RK, Coats SR, Braham PH, Karimi-Naser LM, Darveau RP. The structurally similar, penta-acylated lipopolysaccharides of *Porphyromonas gingivalis* and *Bacteroides* elicit strikingly different innate immune responses. *Microb Pathog* 2009; 47:68-77.
50. Mazumdar V, Snitkin ES, Amar S, Segre D. Metabolic network model of a human oral pathogen. *Journal of bacteriology* 2009; 191:74-90.
51. Thiele I, Vo TD, Price ND, Palsson BO. Expanded metabolic reconstruction of *Helicobacter pylori* (iIT341 GSM/GPR): an in silico genome-scale characterization of single- and double-deletion mutants. *Journal of bacteriology* 2005; 187:5818-30.
52. Coats SR, Berezow AB, To TT, Jain S, Bainbridge BW, Banani KP, et al. The Lipid A Phosphate Position Determines Differential Host Toll-Like Receptor 4 Responses to Phylogenetically Related Symbiotic and Pathogenic Bacteria. *Infection and Immunity* 2011; 79:203-10.
53. Xu J, Mahowald MA, Ley RE, Lozupone CA, Hamady M, Martens EC, et al. Evolution of symbiotic bacteria in the distal human intestine. *PLoS Biol* 2007; 5:e156.
54. Zhang G, Dai J, Lu Z, Dunaway-Mariano D. The phosphonopyruvate decarboxylase from *Bacteroides fragilis*. *Journal of Biological Chemistry* 2003; 278:41302-8.
55. Wang L, Lu Z, Allen KN, Mariano PS, Dunaway-Mariano D. Human symbiont *Bacteroides thetaiotaomicron* synthesizes 2-keto-3-deoxy-D-glycero-D- galacto-nononic acid (KDN). *Chem Biol* 2008; 15:893-7.
56. Coyne MJ, Reinap B, Lee MM, Comstock LE. Human symbionts use a host-like pathway for surface fucosylation. *Science (New York, NY)* 2005; 307:1778-81.
57. Kato M, Muto Y, Tanaka-Bandoh K, Watanabe K, Ueno K. Sphingolipid composition in *Bacteroides* species. *Anaerobe* 1995; 1:135-9.
58. Smith RD, Salyers AA. Incorporation of Leucine into Phospholipids of *Bacteroides-Thetaiotaomicron*. *Journal of bacteriology* 1981; 145:8-13.
59. Stoffel W, Dittmar K, Wilmes R. Sphingolipid metabolism in *Bacteroidaceae*. *Hoppe Seylers Z Physiol Chem* 1975; 356:715-25.
60. An D, Na C, Bielawski J, Hannun YA, Kasper DL. Membrane sphingolipids as essential molecular signals for *Bacteroides* survival in the intestine. *Proceedings of the*

- National Academy of Sciences of the United States of America 2011; 108 Suppl 1:4666-71.
61. Schellenberger J, Que R, Fleming RM, Thiele I, Orth JD, Feist AM, et al. Quantitative prediction of cellular metabolism with constraint-based models: the COBRA Toolbox v2.0. *Nature protocols* 2011; 6:1290-307.
  62. Mo ML, Palsson BO, Herrgard MJ. Connecting extracellular metabolomic measurements to intracellular flux states in yeast. *BMC systems biology* 2009; 3:37.
  63. Goodman AL, McNulty NP, Zhao Y, Leip D, Mitra RD, Lozupone CA, et al. Identifying genetic determinants needed to establish a human gut symbiont in its habitat. *Cell Host Microbe* 2009; 6:279-89.
  64. Fendt SM, Buescher JM, Rudroff F, Picotti P, Zamboni N, Sauer U. Tradeoff between enzyme and metabolite efficiency maintains metabolic homeostasis upon perturbations in enzyme capacity. *Molecular systems biology* 2010; 6:356.
  65. Aziz RK, Bartels D, Best AA, DeJongh M, Disz T, Edwards RA, et al. The RAST server: Rapid annotations using subsystems technology. *Bmc Genomics* 2008; 9:-.
  66. Thorleifsson SG, Thiele I. rBioNet: A COBRA toolbox extension for reconstructing high-quality biochemical networks. *Bioinformatics* 2011; 27:2009-10.
  67. Degnan BA, Macfarlane GT. Carbohydrate Utilization Patterns and Substrate Preferences in *Bacteroides-Thetaiotaomicron*. *Anaerobe* 1995; 1:25-33.
  68. Kotarski SF, Salyers AA. Isolation and characterization of outer membranes of *Bacteroides thetaiotaomicron* grown on different carbohydrates. *Journal of bacteriology* 1984; 158:102-9.
  69. Sonnenburg ED, Zheng HJ, Joglekar P, Higginbottom SK, Firbank SJ, Bolam DN, et al. Specificity of Polysaccharide Use in Intestinal *Bacteroides* Species Determines Diet-Induced Microbiota Alterations. *Cell* 2010; 141:1241-U256.
  70. Salyers AA, Vercellotti JR, West SEH, Wilkins TD. Fermentation of Mucin and Plant Polysaccharides by Strains of *Bacteroides* from Human Colon. *Applied and environmental microbiology* 1977; 33:319-22.
  71. Hooper LV, Xu J, Falk PG, Midtvedt T, Gordon JI. A molecular sensor that allows a gut commensal to control its nutrient foundation in a competitive ecosystem. *Proceedings of the National Academy of Sciences of the United States of America* 1999; 96:9833-8.
  72. Dworkin M, Falkow S. *The prokaryotes : a handbook on the biology of bacteria*. New York ; [London]: Springer, 2006.
  73. Anderson KL, Salyers AA. Biochemical-Evidence That Starch Breakdown by *Bacteroides-Thetaiotaomicron* Involves Outer-Membrane Starch-Binding Sites and Periplasmic Starch-Degrading Enzymes. *Journal of bacteriology* 1989; 171:3192-8.
  74. Smith KA, Salyers AA. Characterization of a neopullulanase and an alpha-glucosidase from *Bacteroides thetaiotaomicron* 95-1. *Journal of bacteriology* 1991; 173:2962-8.
  75. Van der Meulen R, Makras L, Verbrugghe K, Adriany T, De Vuyst L. In vitro kinetic analysis of oligofructose consumption by *Bacteroides* and *Bifidobacterium* spp. indicates different degradation mechanisms. *Applied and environmental microbiology* 2006; 72:1006-12.
  76. Salyers AA, Pajeau M. Competitiveness of Different Polysaccharide Utilization Mutants of *Bacteroides-Thetaiotaomicron* in the Intestinal Tracts of Germfree-Mice. *Applied and environmental microbiology* 1989; 55:2572-8.
  77. Tailford LE, Money VA, Smith NL, Dumon C, Davies GJ, Gilbert HJ. Mannose foraging by *Bacteroides thetaiotaomicron*: structure and specificity of the beta-mannosidase, BtMan2A. *Journal of Biological Chemistry* 2007; 282:11291-9.
  78. Rochet V, Bernalier A. Utilization of algal polysaccharides by human colonic bacteria, in axenic culture or in association with hydrogenotrophic microorganisms. *Reprod Nutr Dev* 1997; 37:221-9.

79. Shaya D, Hahn BS, Park NY, Sim JS, Kim YS, Cygler M. Characterization of chondroitin sulfate lyase ABC from *Bacteroides thetaiotaomicron* WAL2926. *Biochemistry* 2008; 47:6650-61.
80. Samuel BS, Hansen EE, Manchester JK, Coutinho PM, Henrissat B, Fulton R, et al. Genomic and metabolic adaptations of *Methanobrevibacter smithii* to the human gut. *Proceedings of the National Academy of Sciences of the United States of America* 2007; 104:10643-8.
81. Noack J, Dongowski G, Hartmann L, Blaut M. The human gut bacteria *Bacteroides thetaiotaomicron* and *Fusobacterium varium* produce putrescine and spermidine in cecum of pectin-fed gnotobiotic rats. *J Nutr* 2000; 130:1225-31.
82. Ramotar K, Conly JM, Chubb H, Louie TJ. Production of menaquinones by intestinal anaerobes. *J Infect Dis* 1984; 150:213-8.
83. Marie S, Heron B, Bitoun P, Timmerman T, Van Den Berghe G, Vincent MF. AICA-ribosiduria: a novel, neurologically devastating inborn error of purine biosynthesis caused by mutation of ATIC. *Am J Hum Genet* 2004; 74:1276-81.
84. Kolb-Maurer A, Grzeschik KH, Haas D, Brocker EB, Hamm H. Conradi-Hunermann-Happle syndrome (X-linked dominant chondrodysplasia punctata) confirmed by plasma sterol and mutation analysis. *Acta Derm Venereol* 2008; 88:47-51.
85. Means GD, Boyd Y, Willis CR, Derry JM. Transgenic rescue of the tattered phenotype by using a BAC encoding Ebp. *Mamm Genome* 2001; 12:323-5.
86. Huyghe S, Mannaerts GP, Baes M, Van Veldhoven PP. Peroxisomal multifunctional protein-2: the enzyme, the patients and the knockout mouse model. *Biochim Biophys Acta* 2006; 1761:973-94.
87. Andersson HC, Kratz L, Kelley R. Desmosterolosis presenting with multiple congenital anomalies and profound developmental delay. *Am J Med Genet* 2002; 113:315-9.
88. Di Pietro E, Sirois J, Tremblay ML, MacKenzie RE. Mitochondrial NAD-dependent methylenetetrahydrofolate dehydrogenase-methenyltetrahydrofolate cyclohydrolase is essential for embryonic development. *Molecular and cellular biology* 2002; 22:4158-66.
89. Mirza R, Hayasaka S, Takagishi Y, Kambe F, Ohmori S, Maki K, et al. DHCR24 gene knockout mice demonstrate lethal dermatopathy with differentiation and maturation defects in the epidermis. *J Invest Dermatol* 2006; 126:638-47.
90. Banka S, Blom HJ, Walter J, Aziz M, Urquhart J, Clouthier CM, et al. Identification and Characterization of an Inborn Error of Metabolism Caused by Dihydrofolate Reductase Deficiency. *Am J Hum Genet* 2011; 88:216-25.
91. Brunetti-Pierri N, Corso G, Rossi M, Ferrari P, Balli F, Rivasi F, et al. Lathosterolosis, a novel multiple-malformation/mental retardation syndrome due to deficiency of 3beta-hydroxysteroid-delta5-desaturase. *Am J Hum Genet* 2002; 71:952-8.
92. Krakowiak PA, Wassif CA, Kratz L, Cozma D, Kovarova M, Harris G, et al. Lathosterolosis: an inborn error of human and murine cholesterol synthesis due to lathosterol 5-desaturase deficiency. *Human Molecular Genetics* 2003; 12:1631-41.
93. Haas D, Hoffmann GF. Mevalonate kinase deficiencies: from mevalonic aciduria to hyperimmunoglobulinemia D syndrome. *Orphanet J Rare Dis* 2006; 1.
94. Bailey CJ. Orotic aciduria and uridine monophosphate synthase: A reappraisal. *J Inher Metab Dis* 2009.
95. Huck JH, Verhoeven NM, Struys EA, Salomons GS, Jakobs C, van der Knaap MS. Ribose-5-phosphate isomerase deficiency: new inborn error in the pentose phosphate pathway associated with a slowly progressive leukoencephalopathy. *Am J Hum Genet* 2004; 74:745-51.
96. Yu H, Wessels A, Tint GS, Patel SB. Partial rescue of neonatal lethality of Dhcr7 null mice by a nestin promoter-driven DHCR7 transgene expression. *Brain Res Dev Brain Res* 2005; 156:46-60.

97. Koropatkin NM, Martens EC, Gordon JI, Smith TJ. Starch catabolism by a prominent human gut symbiont is directed by the recognition of amylose helices. *Structure* 2008; 16:1105-15.
98. Smith KA, Salyers AA. Cell-Associated Pullulanase from *Bacteroides*-*Thetaiotaomicron* - Cloning, Characterization, and Insertional Mutagenesis to Determine Role in Pullulan Utilization. *Journal of bacteriology* 1989; 171:2116-23.
99. Cheng Q, Yu MC, Reeves AR, Salyers AA. Identification and characterization of a *Bacteroides* gene, *csuF*, which encodes an outer membrane protein that is essential for growth on chondroitin sulfate. *Journal of bacteriology* 1995; 177:3721-7.
100. Baggio L, Morrison M. The NAD(P)H-utilizing glutamate dehydrogenase of *Bacteroides* *thetaiotaomicron* belongs to enzyme family I, and its activity is affected by trans-acting gene(s) positioned downstream of *gdhA*. *Journal of bacteriology* 1996; 178:7212-20.

Only exchange reactions with a flux > 0.01 (absolute value) mmol g DW h<sup>-1</sup> and a difference of at least 10% between germinative and DBO-associated mouse model were included in the analysis.

Total metabolites that differed between sham and treatment B (benzocaine) associated more with sensory axons in a least one fish.

Only exchange reactions with a flux  $> 0.01$  (absolute value) and a difference of at least 10% between gemfree and EPR-associated means were included in the analysis.

HP = high-protein diet; HF = high-fat diet; W = Western diet. **Blue** = higher fat in BP-associated means, **Red** = higher fat in protein means, **Green** = fat above cutoff in BP-associated means only.

[illegible]



Table S8: Growth conditions for model behavior and growth capacity tests of IAH991.

Uptake of metabolites at a certain rate is allowed by constraining the lower bound of the respective exchange reaction to the corresponding negative value. For nutrients which are not provided in the simulated medium, the lower bound of exchange reaction is constrained to zero.

a) Essential minerals and cofactors required by IAH991

| Nutrients provided in every test | BiGG ID | Uptake Rate (mmol.gdw <sup>-1</sup> .hr <sup>-1</sup> ) |
|----------------------------------|---------|---------------------------------------------------------|
| Calcium                          | ca2     | 10                                                      |
| Cob(D)alamin                     | cbt1    | 10                                                      |
| Co2 <sup>+</sup>                 | cobalt2 | 10                                                      |
| Fe2 <sup>+</sup>                 | fe2     | 10                                                      |
| Fe3 <sup>+</sup>                 | fe3     | 10                                                      |
| Hydrogen sulfide                 | h2s     | 10                                                      |
| Potassium                        | k       | 10                                                      |
| Magnesium                        | mg2     | 10                                                      |
| Mn2 <sup>+</sup>                 | mn2     | 10                                                      |
| Sodium                           | na1     | 10                                                      |
| Protheme                         | pheme   | 10                                                      |
| Hydrogenphosphate                | pi      | 10                                                      |
| Zinc                             | zn2     | 10                                                      |
| Ammonium                         | nh4     | 100                                                     |
| CO <sub>2</sub>                  | co2     | 100                                                     |
| H <sub>2</sub> O                 | h2o     | 100                                                     |

b) Uptake rates for calculations of iAH991 growth on different sole carbon sources ( for Table S3)

| Carbon sources                                                                                                      | BIC/G ID      | Uptake Rate [mmol <sub>gluc</sub> <sup>-1</sup> h <sup>-1</sup> ] |
|---------------------------------------------------------------------------------------------------------------------|---------------|-------------------------------------------------------------------|
| N-Acetyl-D-glucosamine                                                                                              | acgl          | 10                                                                |
| N-Acetyl-D-glucosamine                                                                                              | acgam         | 10                                                                |
| N-acetylneuraminate                                                                                                 | acnam         | 10                                                                |
| Alpha-mannan (yeast)                                                                                                | amman140      | 0,07143                                                           |
| Arabinan                                                                                                            | arabian101    | 0,1179                                                            |
| Arabinogalactan                                                                                                     | arabingal     | 0,0155                                                            |
| L-Arabinose                                                                                                         | arab-L        | 12                                                                |
| Cellobiose                                                                                                          | cellb         | 5                                                                 |
| Core 4 (mucin O-glycan)                                                                                             | core4         | 2,5                                                               |
| Core 5 (mucin O-glycan)                                                                                             | core5         | 3,75                                                              |
| Core 7 (mucin O-glycan)                                                                                             | core7         | 3,75                                                              |
| Core 8 (mucin O-glycan)                                                                                             | core8         | 4,2857                                                            |
| Chondroitin sulfate A (GalNAc-4S-GlcA) proteoglycan                                                                 | cspg_a        | 1,33                                                              |
| Chondroitin sulfate B / dermatan sulfate (IdoA2S-GalNAc-4S) proteoglycan                                            | cspg_b        | 1,33                                                              |
| Chondroitin sulfate C (GalNAc-6S-GlcA) proteoglycan                                                                 | cspg_c        | 1,33                                                              |
| Dextran 40, 1,6-alpha-D-Glucan                                                                                      | dextran40     | 0,125                                                             |
| Disialyl-T antigen (mucin O-glycan)                                                                                 | dsT_antigen   | 1,6667                                                            |
| F1alpha (mucin O-glycan)                                                                                            | f1a           | 2,7273                                                            |
| D-Fructose                                                                                                          | fru           | 10                                                                |
| L-Fucose                                                                                                            | fuc-L         | 10                                                                |
| D-Galactose                                                                                                         | gal           | 10                                                                |
| D-Galacturonate                                                                                                     | galur         | 10                                                                |
| D-Glucosamine                                                                                                       | gam           | 10                                                                |
| D-Glucose                                                                                                           | glc-D         | 10                                                                |
| D-Glucuronate                                                                                                       | glcur         | 10                                                                |
| glycogen (n=1500 repeat units) (glc alpha 1,4/6 glc)                                                                | glycogen1500  | 0,0067                                                            |
| GlcNAc-alpha-1,4-Core 1 (mucin O-glycan)                                                                            | gncore1       | 2,7273                                                            |
| GlcNAc-alpha-1,4-Core 2 (mucin O-glycan)                                                                            | gncore2       | 2,7273                                                            |
| Hyaluronan                                                                                                          | ha            | 2,12                                                              |
| Homogalacturonan                                                                                                    | homogal       | 0,09091                                                           |
| Heparin sulfate proteoglycan                                                                                        | hpg           | 0,76                                                              |
| Inulin                                                                                                              | inulin        | 0,33333                                                           |
| Levan, 1000 fructose units                                                                                          | levan1000     | 0,01                                                              |
| Laminarin (n=30 repeat units, beta-1,3 glc)                                                                         | lmn30         | 0,33                                                              |
| D-Mannose                                                                                                           | man           | 10                                                                |
| Pectic galactan                                                                                                     | pecticgal     | 0,1005                                                            |
| Pullulan (n=1200 repeat units, alpha-1,4 and alpha-1,6 bounds)                                                      | pullulan1200  | 0,00833                                                           |
| Rhamnogalacturonan I                                                                                                | rhamnogalurI  | 0,010274                                                          |
| Rhamnogalacturonan II                                                                                               | rhamnogalurII | 0,18927                                                           |
| D-ribose                                                                                                            | rib-D         | 12                                                                |
| L-Rhamnose                                                                                                          | rmn           | 12                                                                |
| Starch n=1200 repeat units (300 repeat units amylose, 900 repeat units amylopectin, corresponds to notatose starch) | starch1200    | 0,00833                                                           |
| Sialyl-Tn antigen (mucin O-glycan)                                                                                  | sTn_antigen   | 3,1579                                                            |
| Starch, structure 1 (1,6-7[1,4-Glc], 4[1,4-Glc])                                                                    | stsch1        | 0,91                                                              |
| D-Xylose                                                                                                            | xyf-D         | 12                                                                |

c) Simulation constraints for gene essentiality analysis of iAH991 corresponding to glucose minimal medium [1].

Uptake of metabolites at a certain rate is allowed by constraining the lower bound of the respective exchange reaction to the corresponding negative value. For nutrients which are not provided in the simulated medium, the lower bound of exchange reaction is constrained to zero.

| Nutrient          | BRGG ID | Uptake Rate (mmol <sub>glc</sub> <sup>-2</sup> hr <sup>-1</sup> ) |
|-------------------|---------|-------------------------------------------------------------------|
| Calcium           | ca2     | 10                                                                |
| Cob(D)alamin      | cbt1    | 10                                                                |
| Co <sup>2+</sup>  | cobalt2 | 10                                                                |
| Fe <sup>2+</sup>  | fe2     | 10                                                                |
| Fe <sup>3+</sup>  | fe3     | 10                                                                |
| Hydrogen sulfide  | h2s     | 10                                                                |
| Potassium         | k       | 10                                                                |
| Magnesium         | mg2     | 10                                                                |
| Mn <sup>2+</sup>  | mn2     | 10                                                                |
| Sodium            | na1     | 10                                                                |
| Prothheme         | pheme   | 10                                                                |
| Hydrogenphosphate | pi      | 10                                                                |
| Zinc              | zn2     | 10                                                                |
| Ammonium          | nh4     | 100                                                               |
| CO <sub>2</sub>   | co2     | 100                                                               |
| H <sub>2</sub> O  | h2o     | 100                                                               |
| D-Glucose         | glc-D   | 10                                                                |

[1] Varel, V. H. and M. P. Bryant (1974). Nutritional features of *Bacteroides fragilis* subsp. *fragilis*. *Appl Microbiol* 28(2): 251-257.

d) Simulation constraints for gene essentiality analysis of iAH991 corresponding to anaerobic tryptone-yeast extract-glucose medium.

Uptake of metabolites at a certain rate is allowed by constraining the lower bound of the respective exchange reaction to the corresponding negative value. For nutrients which are not provided in the simulated medium, the lower bound of exchange reactions is constrained to zero.

Yeast extract equals to metabolite included in the yeast metabolic reconstruction iMM904 [2] (excluding carbohydrates) that can be transported by iAH991, and tryptone equals all amino acids. Also includes glucose and required cofactors, as well as yeast mannun.

| Nutrient             | BGG ID     | Uptake Rate [mmol <sub>g<sub>dw</sub></sub> <sup>-1</sup> h <sup>-1</sup> ] |
|----------------------|------------|-----------------------------------------------------------------------------|
| Calcium              | ca2        | 1                                                                           |
| Cob(II)alamin        | cbl1       | 1                                                                           |
| Co <sup>2+</sup>     | cobalt2    | 1                                                                           |
| Fe <sup>2+</sup>     | fe2        | 1                                                                           |
| Fe <sup>3+</sup>     | fe3        | 1                                                                           |
| Hydrogen sulfide     | h2s        | 1                                                                           |
| potassium            | k          | 1                                                                           |
| magnesium            | mg2        | 1                                                                           |
| Mn <sup>2+</sup>     | mn2        | 1                                                                           |
| Sodium               | na1        | 1                                                                           |
| Protoheme            | pheme      | 1                                                                           |
| hydrogenphosphate    | pi         | 1                                                                           |
| Zinc                 | zn2        | 1                                                                           |
| Ammonium             | nh4        | 10                                                                          |
| CO <sub>2</sub>      | co2        | 10                                                                          |
| H <sub>2</sub> O     | h2o        | 10                                                                          |
| D-Glucose            | glc-D      | 10                                                                          |
| Alpha-mannan (yeast) | amannan140 | 10                                                                          |
| 4-Aminobutanoate     | 4abut      | 10                                                                          |
| Acetate              | ac         | 10                                                                          |
| Adenosine            | adh        | 10                                                                          |
| L-Alanine            | ala-L      | 10                                                                          |
| L-Arginine           | arg-L      | 10                                                                          |
| L-Asparagine         | asn-L      | 10                                                                          |
| L-Aspartate          | asp-L      | 10                                                                          |
| Cys-Gly              | cgly       | 10                                                                          |
| Citrate              | cit        | 10                                                                          |
| L-Cysteine           | cys-L      | 10                                                                          |
| Cytidine             | cytd       | 10                                                                          |
| Deoxyadenosine       | dad-2      | 10                                                                          |
| Deoxycytidine        | dcyt       | 10                                                                          |
| Deoxyguanosine       | dgsn       | 10                                                                          |
| Deoxyinosine         | din        | 10                                                                          |
| Deoxyuridine         | duri       | 10                                                                          |
| Ethanol              | etoh       | 10                                                                          |
| Formate              | for        | 10                                                                          |
| Fumarate             | fum        | 10                                                                          |
| D-Galactose          | gal        | 10                                                                          |
| L-Glutamine          | glu-L      | 10                                                                          |
| L-Glutamate          | glu-L      | 10                                                                          |
| Glycine              | gly        | 10                                                                          |
| Guanosine            | gsn        | 10                                                                          |
| proton               | h          | 10                                                                          |
| L-Histidine          | his-L      | 10                                                                          |
| L-Isoleucine         | ile-L      | 10                                                                          |
| Inosine              | ims        | 10                                                                          |
| D-Lactate            | lac-D      | 10                                                                          |
| L-Lactate            | lac-L      | 10                                                                          |
| L-Leucine            | leu-L      | 10                                                                          |
| L-Lysine             | lys-L      | 10                                                                          |
| L-Methionine         | met-L      | 10                                                                          |
| Methylglyoxal        | mthgxl     | 10                                                                          |
| NMN                  | nmn        | 10                                                                          |
| Ornithine            | orn        | 10                                                                          |
| Phenylacetic acid    | pac        | 10                                                                          |
| L-Phenylalanine      | phe-L      | 10                                                                          |
| L-Proline            | pro-L      | 10                                                                          |
| Putrescine           | ptrc       | 10                                                                          |
| Pyridoxine           | pydxn      | 10                                                                          |
| pyruvate             | pyr        | 10                                                                          |
| Riboflavin           | ribflv     | 10                                                                          |
| L-Serine             | ser-L      | 10                                                                          |
| Sulfate              | so4        | 10                                                                          |
| Spermidine           | spmd       | 10                                                                          |
| Succinate            | succ       | 10                                                                          |
| Taurine              | taur       | 10                                                                          |
| taurocholic acid     | tchola     | 10                                                                          |
| Thiamin              | thm        | 10                                                                          |
| L-Threonine          | thr-L      | 10                                                                          |
| Thymidine            | thymd      | 10                                                                          |
| L-Tryptophan         | trp-L      | 10                                                                          |
| L-Tyrosine           | tyr-L      | 10                                                                          |
| Uracil               | ura        | 10                                                                          |
| Urea                 | urea       | 10                                                                          |
| Uridine              | uri        | 10                                                                          |
| L-Valine             | val-L      | 10                                                                          |
| Xanthine             | xan        | 10                                                                          |

[2] Mo ML, Paxon BO, Herrgard MJ. Connecting extracellular metabolomic measurements to intracellular flux states in yeast. BMC Syst Biol 2009; 3:37.

**Table S7: Reactions showing increased flux in the *B. thetaiotaomicron*-associated mouse model when orotic aciduria, AICA-ribosiduria and ribose-5-phosphate isomerase deficiency were simulated.**

*B. thetaiotaomicron* - and mouse reactions with a fold change in flux > 3 (rounded) compared to the healthy model are shown. The fluxes were calculated using flux variability analysis for optimization of mouse growth on Western Diet.

**a) Orotic aciduria**

|                                      | Reaction ID     | Reaction Description                                     | Subsystem                             | Fold Change in minimal flux   | Fold Change in maximal flux   |
|--------------------------------------|-----------------|----------------------------------------------------------|---------------------------------------|-------------------------------|-------------------------------|
| <i>B. thetaiotaomicron</i> reactions | IEX_BTcytl[u]tr | Cytidine exchange (internal)                             | Exchange Reactions                    | 0,00                          | 4,36                          |
|                                      | IEX_BTdcyl[u]tr | Deoxycytidine exchange (internal)                        | Exchange Reactions                    | 0,00                          | 4,33                          |
|                                      | IEX_BTuri[u]tr  | Uridine exchange (internal)                              | Exchange Reactions                    | Zero to 0,06 (absolute value) | 5,54                          |
|                                      | BTASPCt         | Aspartate carbamoyltransferase                           | Purine and Pyrimidine Biosynthesis    | 10,02                         | 3,74                          |
|                                      | BTCBPS          | Carbamoyl-phosphate synthase (glutamine-hydrolysing)     | Purine and Pyrimidine Biosynthesis    | 10,02                         | 3,38                          |
|                                      | BTCYTD2r        | Cytidine transport in via proton symport, reversible     | Transport, Extracellular              | 4,36                          | 0,00                          |
|                                      | BTCTYK1         | Cytidylate kinase (CMP)                                  | Nucleotide Salvage Pathway            | 11,71                         | 1,04                          |
|                                      | BTDCYT2r        | Deoxycytidine transport in via proton symport reversible | Transport, Extracellular              | 4,33                          | 0,00                          |
|                                      | BTDHORdum       | Fumarate-dependent dihydroorotate dehydrogenase          | Purine and Pyrimidine Biosynthesis    | 10,02                         | 3,74                          |
|                                      | BTDHORTS        | Dihydroorotase                                           | Purine and Pyrimidine Biosynthesis    | 3,74                          | 10,02                         |
|                                      | BTNDPK3         | Nucleoside-diphosphate kinase (ATP:CDP)                  | Nucleotide Salvage Pathway            | 11,71                         | 1,04                          |
|                                      | BTNDPK6         | Nucleoside-diphosphate kinase (ATP:dUDP)                 | Nucleotide Salvage Pathway            | 3,97                          | 0,98                          |
|                                      | BTOMPDC         | Orotidine-5-phosphate decarboxylase                      | Purine and Pyrimidine Biosynthesis    | 10,02                         | 3,74                          |
|                                      | BTORPT          | Orotate phosphoribosyltransferase                        | Purine and Pyrimidine Biosynthesis    | 3,74                          | 10,02                         |
|                                      | BTNRTR4         | Ribonucleoside-triphosphate reductase (UTP)              | Nucleotide Salvage Pathway            | 0,00                          | 3,97                          |
|                                      | BTTRDRr         | Thioredoxin reductase                                    | Nucleotide Metabolism (BIGG database) | 1,04                          | 3,70                          |
|                                      | BTURIDK2r       | Uridylate kinase (dUMP)                                  | Nucleotide Salvage Pathway            | 3,97                          | 0,98                          |
|                                      | BTURIR2r        | Uridine transport in via proton symport reversible       | Transport, Extracellular              | 5,54                          | Zero to 0,06 (absolute value) |
|                                      | IEX_MMcytl[u]tr | Cytidine exchange (internal)                             | Exchange Reactions                    | 4,36                          | 0,00                          |
|                                      | IEX_MMdcyl[u]tr | Deoxycytidine exchange (internal)                        | Exchange Reactions                    | 4,33                          | 0,00                          |
|                                      | IEX_MMuri[u]tr  | Uridine exchange (internal)                              | Exchange Reactions                    | 5,54                          | Zero to 0,06 (absolute value) |
|                                      | MMCYTD1         | Cytidine facilitated transport in cytosol                | Transport, Extracellular              | 0,00                          | 4,36                          |
|                                      | MMCYTD4         | Cytidine transport in via sodium symport                 | Transport, Extracellular              | 0,00                          | 4,36                          |
|                                      | MMCYTD5         | Cytidine transport (1:2 Na/cytd cotransport)             | Transport, Extracellular              | 0,00                          | 4,36                          |
| Mouse reactions                      | MMDCYTD         | Deoxycytidine deaminase                                  | Nucleotide Salvage Pathway            | 0,00                          | 4,33                          |
|                                      | MMDCYT1         | Deoxycytidine transport via diffusion                    | Transport, Extracellular              | 0,00                          | 4,33                          |
|                                      | MMUR1r          | Uridine facilitated transport in cytosol                 | Transport, Extracellular              | 0,00                          | 5,54                          |
|                                      | MMUR1u4         | Uridine transport in via sodium symport                  | Transport, Extracellular              | 0,00                          | 5,54                          |
|                                      | MMUR1u5         | Uridine transport in via sodium symport (1:2)            | Transport, Extracellular              | 0,00                          | 5,54                          |

**b) AICA-ribosiduria**

|                                      | Reaction ID      | Reaction Description                                      | Subsystem                          | Fold Change in minimal flux   | Fold Change in maximal flux   |
|--------------------------------------|------------------|-----------------------------------------------------------|------------------------------------|-------------------------------|-------------------------------|
| <i>B. thetaiotaomicron</i> reactions | IEX_BTdad-2[u]tr | Deoxyadenosine exchange (internal)                        | Exchange Reactions                 | 0,00                          | 4,71                          |
|                                      | IEX_BTgsn[u]tr   | Guanosine exchange (internal)                             | Exchange Reactions                 | 0,00                          | 6,90                          |
|                                      | IEX_BTins[u]tr   | Inosine exchange (internal)                               | Exchange Reactions                 | Zero to 0,08 (absolute value) | 8,26                          |
|                                      | BTADSL2r         | Adenylosuccinate lyase                                    | Purine and Pyrimidine Biosynthesis | 7,53                          | 3,98                          |
|                                      | BTAIRCr          | Phosphoribosylaminoimidazole carboxylase                  | Purine and Pyrimidine Biosynthesis | 0,09                          | 3,98                          |
|                                      | BTADADK          | Deoxyadenylate kinase                                     | Nucleotide Salvage Pathway         | 4,71                          | 0,00                          |
|                                      | BTADADN2r        | Deoxyadenosine transport in via proton symport reversible | Transport, Extracellular           | 4,71                          | 0,00                          |
|                                      | BTDGK1           | Deoxyguanylate kinase (dGMP:ATP)                          | Nucleotide Salvage Pathway         | 3,91                          | 0,97                          |
|                                      | BTDIRIPP         | Deoxyuridine phosphorylase                                | Nucleotide Salvage Pathway         | 0,00                          | 3,91                          |
|                                      | BTGARFTi         | Phosphoribosylglycinamide formyltransferase, irreversible | Purine and Pyrimidine Biosynthesis | 0,00                          | 3,97                          |
|                                      | BTGART           | GAR transformylase-T                                      | Purine and Pyrimidine Biosynthesis | 0,00                          | 4,04                          |
|                                      | BTGLUPRT         | Glutamine phosphoribosyldiphosphate amidotransferase      | Purine and Pyrimidine Biosynthesis | 7,47                          | 3,97                          |
|                                      | BTGMP52          | GMP synthase                                              | Purine and Pyrimidine Biosynthesis | 1,04                          | 4,10                          |
|                                      | BTGSN2r          | Guanosine transport in via proton symport reversible      | Transport, Extracellular           | 6,90                          | 0,00                          |
|                                      | BTIMPd           | IMP dehydrogenase                                         | Purine and Pyrimidine Biosynthesis | 1,04                          | 4,10                          |
|                                      | BTINS2           | Inosine transport in via proton symport reversible        | Transport, Extracellular           | 8,26                          | Zero to 0,08 (absolute value) |
|                                      | BTNTD6           | 5-nucleotidase (dAMP)                                     | Nucleotide Salvage Pathway         | 0,00                          | 4,71                          |
|                                      | BTNTD8           | 5-nucleotidase (dGMP)                                     | Nucleotide Salvage Pathway         | 0,00                          | 3,91                          |
|                                      | BTNTPTP1         | Nucleoside triphosphate tripholyhydrolase                 | Nucleotide Salvage Pathway         | 0,00                          | 3,91                          |
|                                      | BTPRAGS          | Phosphoribosylglycinamide synthetase                      | Purine and Pyrimidine Biosynthesis | 7,47                          | 3,97                          |
|                                      | BTPRASi          | Phosphoribosylaminoimidazole synthase                     | Purine and Pyrimidine Biosynthesis | 7,47                          | 3,97                          |
|                                      | BTPRASCSi        | Phosphoribosylaminoimidazolesuccinocarboxamide synthase   | Purine and Pyrimidine Biosynthesis | 7,53                          | 3,98                          |
|                                      | BTPRFGS          | Phosphoribosylformylglycinamide synthase                  | Purine and Pyrimidine Biosynthesis | 7,47                          | 3,97                          |
|                                      | BTGUNP2          | Purine-nucleoside phosphorylase (Deoxyadenosine)          | Nucleotide Salvage Pathway         | 3,91                          | 0,00                          |
|                                      | BTGUNP4          | Purine-nucleoside phosphorylase (Deoxyguanosine)          | Nucleotide Salvage Pathway         | 0,00                          | 3,91                          |
|                                      | BTNRTR1          | Ribonucleoside-triphosphate reductase (ATP)               | Nucleotide Salvage Pathway         | 1,04                          | 4,42                          |
|                                      | BTNRTR2          | Ribonucleoside-triphosphate reductase (GTP)               | Nucleotide Salvage Pathway         | 1,04                          | 3,67                          |
|                                      | BTUPPRT          | Uracil phosphoribosyltransferase                          | Nucleotide Salvage Pathway         | 0,00                          | 3,91                          |
| Mouse reactions                      | IEX_MMdad-2[u]tr | Deoxyadenosine exchange (internal)                        | Exchange Reactions                 | 4,71                          | 0,00                          |
|                                      | IEX_MMgsn[u]tr   | Guanosine exchange (internal)                             | Exchange Reactions                 | 6,90                          | 0,00                          |
|                                      | IEX_MMins[u]tr   | Inosine exchange (internal)                               | Exchange Reactions                 | 8,26                          | Zero to 0,08 (absolute value) |
|                                      | MMDADAe          | Deoxyadenosine deaminase, extracellular                   | Nucleotide Salvage Pathway         | 0,00                          | 4,63                          |
|                                      | MMDADN4          | Deoxyadenosine transport via diffusion                    | Transport, Extracellular           | 0,00                          | 4,71                          |
|                                      | MMDINr           | Deoxyinosine transport via diffusion                      | Transport, Extracellular           | 0,00                          | 4,63                          |
|                                      | MMGSNr           | Guanosine facilitated transport in cytosol                | Transport, Extracellular           | 0,00                          | 6,90                          |
|                                      | MMGSN4           | Guanosine transport in via sodium symport                 | Transport, Extracellular           | 0,00                          | 6,90                          |
|                                      | MMGSN5           | Guanosine transport in via sodium (1:2) symport           | Transport, Extracellular           | 0,00                          | 6,90                          |
|                                      | MMINSr           | Inosine transport (diffusion)                             | Transport, Extracellular           | 0,00                          | 8,26                          |
|                                      | MMINS4           | Inosine transport in via sodium symport                   | Transport, Extracellular           | 0,00                          | 8,26                          |
|                                      | MMINS5           | Inosine transport in via sodium (1:2) symport             | Transport, Extracellular           | 0,00                          | 8,26                          |

**c) Ribose-5-phosphate isomerase deficiency**

|                                      | Reaction ID       | Reaction Description                         | Subsystem                          | Fold Change in minimal flux   | Fold Change in maximal flux   |
|--------------------------------------|-------------------|----------------------------------------------|------------------------------------|-------------------------------|-------------------------------|
| <i>B. thetaiotaomicron</i> reactions | IEX_BTrib-D[u]tr  | D-ribose exchange (internal)                 | Exchange Reactions                 | Zero to 0,61 (absolute value) | 3,33                          |
|                                      | BTADNUC           | Adenosine hydrolase                          | Nucleotide Salvage Pathway         | 0,00                          | 3,57                          |
|                                      | BTGNNUC           | Guanosine hydrolase                          | Nucleotide Salvage Pathway         | 0,00                          | 3,57                          |
|                                      | BTGLIAPRT         | Guanine phosphoribosyltransferase            | Nucleotide Salvage Pathway         | 0,00                          | 3,60                          |
|                                      | BTHXPRt           | Hypoxanthine phosphoribosyltransferase       | Nucleotide Salvage Pathway         | 0,00                          | 3,60                          |
|                                      | BTINSH            | Inosine hydrolase                            | Purine and Pyrimidine Biosynthesis | 0,00                          | 3,57                          |
|                                      | BTNTD10           | 5'-nucleotidase (XMP)                        | Nucleotide Salvage Pathway         | 0,00                          | 3,60                          |
|                                      | BTNTD11           | 5'-nucleotidase (IMP)                        | Nucleotide Salvage Pathway         | 0,00                          | 3,60                          |
|                                      | BTNTD7            | 5'-nucleotidase (AMP)                        | Nucleotide Salvage Pathway         | 0,00                          | 3,60                          |
|                                      | BTNTD9            | 5'-nucleotidase (GMP)                        | Nucleotide Salvage Pathway         | 0,00                          | 3,60                          |
|                                      | BTGUNP1           | Purine-nucleoside phosphorylase (Adenosine)  | Nucleotide Salvage Pathway         | 3,60                          | 3,57                          |
|                                      | BTGUNP3           | Purine-nucleoside phosphorylase (Guanosine)  | Nucleotide Salvage Pathway         | 3,57                          | 3,60                          |
|                                      | BTGUNP5           | Purine-nucleoside phosphorylase (Inosine)    | Nucleotide Salvage Pathway         | 3,57                          | 3,60                          |
|                                      | BTGUNP7           | Purine-nucleoside phosphorylase (Xanthosine) | Nucleotide Salvage Pathway         | 3,57                          | 3,60                          |
|                                      | BTXKPT            | Xanthine phosphoribosyltransferase           | Nucleotide Salvage Pathway         | 0,00                          | 3,60                          |
|                                      | BTXTSNH           | Xanthosine hydrolase                         | Purine and Pyrimidine Biosynthesis | 0,00                          | 3,57                          |
| Mouse reactions                      | IEX_MMtrib-D[u]tr | D-ribose exchange (internal)                 | Exchange Reactions                 | 3,33                          | Zero to 0,61 (absolute value) |
|                                      | MMRBK             | Ribokinase                                   | Pentose Phosphate Pathway          | Zero to 0,61 (absolute value) | 3,33                          |
|                                      | MMRIBr            | Ribose transport via diffusion               | Transport, Extracellular           | 1,00                          | 3,33                          |

**Table S9: Simulation constraints for the five diets used this study for analysis of the joint model *lexGEMM* *BO*.**

Uptake of metabolites at a certain rate is allowed by constraining the lower bound of the respective exchange reaction to the corresponding negative value. For nutrients which are not provided in the simulated medium, the lower bound of exchange reactions is constrained to zero.

| Nutrient                                                                            | BIGG ID      | High-protein diet             | High-carbohydrate diet        | High-fat diet                 | Ketogenic diet                | Western diet                  |
|-------------------------------------------------------------------------------------|--------------|-------------------------------|-------------------------------|-------------------------------|-------------------------------|-------------------------------|
| <b>Carbohydrate</b>                                                                 |              | Uptake Rate [mmol.gDw-1.hr-1] | Uptake Rate [mmol.gDw-1.hr-1] | Uptake Rate [mmol.gDw-1.hr-1] | Uptake Rate [mmol.gDw-1.hr-1] | Uptake Rate [mmol.gDw-1.hr-1] |
| D-Fructose                                                                          | fru          | 0,1                           | 1,5                           | 0,1                           | 0,01                          | 1                             |
| glc                                                                                 | glc          | 0,1                           | 1,5                           | 0,1                           | 0,01                          | 1                             |
| Lactose                                                                             | lcts         | 0,05                          | 0,75                          | 0,05                          | 0,005                         | 0,5                           |
| Maltose                                                                             | mlak         | 0,05                          | 0,75                          | 0,05                          | 0,005                         | 0,5                           |
| Sucrose                                                                             | sucr         | 0,05                          | 0,75                          | 0,05                          | 0,005                         | 0,5                           |
| Dextran 40, 1,6-alpha-D-Glucan                                                      | dextran40    | 0,000625                      | 0,009375                      | 0,000625                      | 0,000063                      | 0,00625                       |
| Starch n=1200 repeat units (300 repeat units amylose, 900 repeat units amylopectin) | starch1200   | 0,000042                      | 0,000626                      | 0,000042                      | 0,000004                      | 0,00042                       |
| Pullulan n=1200 repeat units, alpha-1,4 and alpha-1,6 bounds)                       | pullulan1200 | 0,000042                      | 0,000626                      | 0,000042                      | 0,000004                      | 0,00042                       |
| Pectins                                                                             | pect         | 0,000118                      | 0,001775                      | 0,000118                      | 0,0000118                     | 0,00118                       |
| Amylose (n=300 repeat units, alpha-1,4-glc)                                         | amylose300   | 0,000167                      | 0,002501                      | 0,000167                      | 0,000017                      | 0,00167                       |
| Larch arabinogalactan                                                               | arabinoagal  | 0,000078                      | 0,001167                      | 0,000078                      | 0,000008                      | 0,00078                       |
| Mannopentose                                                                        | manpt        | 0,01                          | 0,15                          | 0,01                          | 0,001                         | 0,1                           |
| Laminarin (n=30 repeat units, beta-1,3-glc)                                         | lmn30        | 0,001667                      | 0,025005                      | 0,001667                      | 0,000167                      | 0,01667                       |
| Levan, 1000 fructose units                                                          | levan1000    | 0,00005                       | 0,00075                       | 0,00005                       | 0,000005                      | 0,0005                        |
| Raffinose                                                                           | raffin       | 0,01667                       | 0,25005                       | 0,01667                       | 0,001667                      | 0,1667                        |
| <b>Total percentage</b>                                                             |              | <b>5%</b>                     | <b>75%</b>                    | <b>5%</b>                     | <b>0.5%</b>                   | <b>50%</b>                    |
| <b>Fat</b>                                                                          |              | Uptake Rate [mmol.gDw-1.hr-1] | Uptake Rate [mmol.gDw-1.hr-1] | Uptake Rate [mmol.gDw-1.hr-1] | Uptake Rate [mmol.gDw-1.hr-1] | Uptake Rate [mmol.gDw-1.hr-1] |
| tetradecanoate (n-C14:0)                                                            | tdca         | 0,14228                       | 0,03557                       | 0,53355                       | 0,67583                       | 0,24899                       |
| Hexadecanoate (n-C16:0)                                                             | hdca         | 0,1245                        | 0,031125                      | 0,466875                      | 0,591375                      | 0,21788                       |
| octadecanoate (n-C18:0)                                                             | ocdca        | 0,110668                      | 0,027667                      | 0,415005                      | 0,525673                      | 0,19367                       |
| Arachidic acid                                                                      | arach        | 0,0996                        | 0,0249                        | 0,3735                        | 0,4731                        | 0,1743                        |
| octanoate (n-C8:0)                                                                  | octa         | 0,249                         | 0,06225                       | 0,93375                       | 1,18275                       | 0,43575                       |
| Glycerol                                                                            | glyc         | 0,664                         | 0,166                         | 2,49                          | 3,154                         | 1,162                         |
| Cholesterol                                                                         | chsterol     | 0,07376                       | 0,01844                       | 0,2766                        | 0,35036                       | 0,12908                       |
| Hexadecenoate (n-C16:1)                                                             | hdcea        | 0,1245                        | 0,031125                      | 0,466875                      | 0,591375                      | 0,21788                       |
| octadecenoate (n-C18:1)                                                             | ocdcea       | 0,110668                      | 0,027667                      | 0,415005                      | 0,525673                      | 0,19367                       |
| arachidonic acid                                                                    | arachd       | 0,0996                        | 0,0249                        | 0,3735                        | 0,4731                        | 0,1743                        |
| linoleic acid (all cis C18:2) n-6                                                   | lnlc         | 0,110668                      | 0,027667                      | 0,415005                      | 0,525673                      | 0,19367                       |
| alpha-Linolenic acid, C18:3, n-3                                                    | lnlnc        | 0,110668                      | 0,027667                      | 0,415005                      | 0,525673                      | 0,19367                       |
| <b>Total percentage</b>                                                             |              | <b>20%</b>                    | <b>5%</b>                     | <b>75%</b>                    | <b>95%</b>                    | <b>35%</b>                    |
| <b>Protein</b>                                                                      |              | Uptake Rate [mmol.gDw-1.hr-1] | Uptake Rate [mmol.gDw-1.hr-1] | Uptake Rate [mmol.gDw-1.hr-1] | Uptake Rate [mmol.gDw-1.hr-1] | Uptake Rate [mmol.gDw-1.hr-1] |
| L-Alanine                                                                           | ala-L        | 1,5                           | 0,4                           | 0,4                           | 0,09                          | 0,3                           |
| L-Arginine                                                                          | arg-L        | 0,75                          | 0,2                           | 0,2                           | 0,045                         | 0,15                          |
| L-Glutamate                                                                         | gla-L        | 0,9                           | 0,24                          | 0,24                          | 0,054                         | 0,18                          |
| Glycine                                                                             | gly          | 2,25                          | 0,6                           | 0,6                           | 0,135                         | 0,45                          |
| L-Isoleucine                                                                        | ile-L        | 0,75                          | 0,2                           | 0,2                           | 0,045                         | 0,15                          |
| L-Leucine                                                                           | leu-L        | 0,75                          | 0,2                           | 0,2                           | 0,045                         | 0,15                          |
| L-Lysine                                                                            | lys-L        | 0,75                          | 0,2                           | 0,2                           | 0,045                         | 0,15                          |
| L-Methionine                                                                        | met-L        | 0,9                           | 0,24                          | 0,24                          | 0,054                         | 0,18                          |
| L-Proline                                                                           | pro-L        | 0,9                           | 0,24                          | 0,24                          | 0,054                         | 0,18                          |
| L-Asparagine                                                                        | aso-L        | 1,125                         | 0,3                           | 0,3                           | 0,0675                        | 0,225                         |
| L-Aspartate                                                                         | asp-L        | 1,125                         | 0,3                           | 0,3                           | 0,0675                        | 0,225                         |
| L-Histidine                                                                         | his-L        | 0,75                          | 0,2                           | 0,2                           | 0,045                         | 0,15                          |
| L-Phenylalanine                                                                     | phe-L        | 0,495                         | 0,132                         | 0,132                         | 0,0297                        | 0,099                         |
| L-Serine                                                                            | ser-L        | 1,5                           | 0,4                           | 0,4                           | 0,09                          | 0,3                           |
| L-Threonine                                                                         | thr-L        | 1,125                         | 0,3                           | 0,3                           | 0,0675                        | 0,225                         |
| L-Tryptophan                                                                        | trp-L        | 0,405                         | 0,108                         | 0,108                         | 0,0243                        | 0,081                         |
| L-Tyrosine                                                                          | tyr-L        | 0,495                         | 0,132                         | 0,132                         | 0,0297                        | 0,099                         |
| L-Glutamine                                                                         | gln-L        | 0,9                           | 0,24                          | 0,24                          | 0,054                         | 0,18                          |
| L-Valine                                                                            | val-L        | 0,9                           | 0,24                          | 0,24                          | 0,054                         | 0,18                          |
| L-Cysteine                                                                          | cys-L        | 1,5                           | 0,4                           | 0,4                           | 0,09                          | 0,3                           |
| <b>Total percentage</b>                                                             |              | <b>75%</b>                    | <b>20%</b>                    | <b>20%</b>                    | <b>4.5%</b>                   | <b>15%</b>                    |
| <b>Minerals and cofactors</b>                                                       |              | Uptake Rate [mmol.gDw-1.hr-1] | Uptake Rate [mmol.gDw-1.hr-1] | Uptake Rate [mmol.gDw-1.hr-1] | Uptake Rate [mmol.gDw-1.hr-1] | Uptake Rate [mmol.gDw-1.hr-1] |
| Calcium                                                                             | ca2          | 1                             | 1                             | 1                             | 1                             | 1                             |
| Cob(I)alamin                                                                        | cbi1         | 1                             | 1                             | 1                             | 1                             | 1                             |
| Cu2+                                                                                | cobalt2      | 1                             | 1                             | 1                             | 1                             | 1                             |
| Fe2+                                                                                | fe2          | 1                             | 1                             | 1                             | 1                             | 1                             |
| Fe3+                                                                                | fe3          | 1                             | 1                             | 1                             | 1                             | 1                             |
| Hydrogen sulfide                                                                    | h2s          | 1                             | 1                             | 1                             | 1                             | 1                             |
| Potassium                                                                           | k            | 1                             | 1                             | 1                             | 1                             | 1                             |
| Magnesium                                                                           | mg2          | 1                             | 1                             | 1                             | 1                             | 1                             |
| Mn2+                                                                                | mn2          | 1                             | 1                             | 1                             | 1                             | 1                             |
| Sodium                                                                              | na1          | 1                             | 1                             | 1                             | 1                             | 1                             |
| Protoheme                                                                           | pheme        | 1                             | 1                             | 1                             | 1                             | 1                             |
| Zinc                                                                                | zn2          | 1                             | 1                             | 1                             | 1                             | 1                             |
| Ammonium                                                                            | nh4          | 100                           | 100                           | 100                           | 100                           | 100                           |
| Phosphate                                                                           | pi           | 100                           | 100                           | 100                           | 100                           | 100                           |

**Table S10: Description of *Bacteroides thetaiotaomicron* reconstruction iAH991.**

Table S10a: All reactions included in iAH991. Rev = Reversibility (1 = reversible, 0 = irreversible), GA = Gene association, CS = Confidence score, LB = Lower bound, UB = Upper Bound

| SEED Rxn ID | BIGG Rxn ID | Function                                            | Formula                                                     | Rev | GA      | LB    | UB   | CS | Subsystem                       | Reference                    | Notes                                                                                                                                                           | EC Number |
|-------------|-------------|-----------------------------------------------------|-------------------------------------------------------------|-----|---------|-------|------|----|---------------------------------|------------------------------|-----------------------------------------------------------------------------------------------------------------------------------------------------------------|-----------|
|             | 12ETHDt     | 1,2-Ethandiol facilitated transport                 | 12ethd[e] <=> 12ethd[c]                                     | 1   |         | -1000 | 1000 | 1  | Transport, Extracellular        |                              | KEGG Pathway suggests that this metabolite is formed.                                                                                                           |           |
|             | 12PPDRt     | R-Propane-1,2-diol facilitated transport            | 12ppd-R[e] <=> 12ppd-R[c]                                   | 1   |         | -1000 | 1000 | 2  | Transport, Extracellular        | PMID:18848625, PMID:8370454  | Fermentation of rhamnose leads to secretion of propane-1,2-diol as end product. R-propane-1,2-diol is formed via methylglyoxal (PMID:8370454). Gene is unknown. |           |
|             | 12PPDt      | S-Propane-1,2-diol facilitated transport            | 12ppd-S[e] <=> 12ppd-S[c]                                   | 1   |         | -1000 | 1000 | 2  | Transport, Extracellular        | PMID:17448155, PMID:18848625 | Fermentation of fucose and rhamnose leads to secretion of propane-1,2-diol as end product. Gene is unknown.                                                     |           |
| rxn02522    | 23PDE2      | 2,3-Cyclic UMP 3-nucleotidohydrolase                | h2o[c] + 23cump[c] => h[c] + 3ump[c]                        | 0   | BT_1236 | 0     | 1000 | 2  | Nucleotide Salvage Pathway      |                              |                                                                                                                                                                 | 3.1.4.16  |
| rxn02762    | 23PDE4      | 2,3-Cyclic CMP 3-nucleotidohydrolase                | h2o[c] + 23ccmp[c] => h[c] + 3cmp[c]                        | 0   | BT_1236 | 0     | 1000 | 2  | Nucleotide Salvage Pathway      |                              |                                                                                                                                                                 | 3.1.4.16  |
| rxn02521    | 23PDE7      | 2,3-Cyclic AMP 3-nucleotidohydrolase                | h2o[c] + 23camp[c] => h[c] + 3amp[c]                        | 0   | BT_1236 | 0     | 1000 | 2  | Nucleotide Salvage Pathway      |                              |                                                                                                                                                                 | 3.1.4.16  |
| rxn03483    | 23PDE9      | 2,3-Cyclic GMP 3-nucleotidohydrolase                | h2o[c] + 23cgmp[c] => h[c] + 3gmp[c]                        | 0   | BT_1236 | 0     | 1000 | 2  | Nucleotide Salvage Pathway      |                              |                                                                                                                                                                 | 3.1.4.16  |
| rxn07441    | 26DAPLLATi  | L,L-diaminopimelate aminotransferase (irreversible) | h2o[c] + h[c] + thdp[c] + glu-L[c] => 26dap-LL[c] + akgl[c] | 0   | BT_0547 | 0     | 1000 | 2  | Threonine and Lysine Metabolism |                              | Reversible in SEED database, however KEGG states that this reaction runs in the direction of 26dap-LL in vivo.                                                  | 2.6.1.83  |

| SEED Rxn ID | BIGG Rxn ID     | Function                                               | Formula                                     | Rev | GA                                                                          | LB    | UB   | CS | Subsystem                                  | Reference                                   | Notes                                                                                                                                                                                                                            | EC Number |
|-------------|-----------------|--------------------------------------------------------|---------------------------------------------|-----|-----------------------------------------------------------------------------|-------|------|----|--------------------------------------------|---------------------------------------------|----------------------------------------------------------------------------------------------------------------------------------------------------------------------------------------------------------------------------------|-----------|
| rxn02900    | 2AMEPHPAT       | 2-aminoethylphosphonate:pyruvate aminotransferase      | 2ameph[c] + pyr[c] <=> ala-L[c] + pald[c]   | 1   | BT_1718                                                                     | -1000 | 1000 | 3  | Capsular Polysaccharide Biosynthesis       | PMID:12904299                               | PEPM, 3OPDC and 2AMEPHPAT form the biosynthetic pathway of 2-aminoethylphosphonate, a component of the capsular polysaccharide complex of Bacteroides fragilis, and most likely other Bacteroides species.                       | 2.6.1.37  |
|             | 2FUCLAC_FUCLASE | alpha-fucosidase, 2-fucosyllactose (extracellular)     | 2fuclac[e] + h2o[e] => fuc-L[e] + lcts[e]   | 0   | ((BT_1625 or BT_4136) and ((BT_4134 and BT_4135) or (BT_1630 and BT_1631))) | 0     | 1000 | 4  | HMO Degradation                            | PMID: 22036470                              | B. thetaiotaomicron grows on human milk oligosaccharides (HMOs); numerous glycosidase hydrolases are upregulated during growth on HMOs. Involves alpha-fucosidase and susC/SusD (binding proteins).                              |           |
| rxn05358    | 2MBCOATA        | 2-methylbutanoyl-CoA[acyl-carrier-protein] transferase | 2mbcoa[c] + ACP[c] <=> coa[c] + 2mbutACP[c] | 1   | BT_0789                                                                     | -1000 | 1000 | 3  | Glycerophospholipid Metabolism             | PMID: 6102980, PMID: 7440508, PMID: 7204330 | Added manually to BIGG database based on reaction mechanism proposed by Model SEED. This reaction is involved in fatty acid biosynthesis. B. thetaiotaomicron is well known to synthesize iso- and anteiso-branched fatty acids. | 2.3.1.180 |
|             | 2MMALD          | (R)-2-methylmalate dehydratase                         | 2mmal[c] <=> h2o[c] + 2mmale[c]             | 1   | (BT_1859 and BT_1860)                                                       | -1000 | 1000 | 2  | Valine, Leucine, and Isoleucine Metabolism |                                             | Added based on annotation from KEGG                                                                                                                                                                                              | 4.2.1.35  |
|             | 2MMALD2         | 3-isopropylmalate/(R)-2-methylmalate dehydratase       | h2o[c] + 2mmale[c] <=> e3mmal[c]            | 1   | (BT_1859 and BT_1860)                                                       | -1000 | 1000 | 2  | Valine, Leucine, and Isoleucine Metabolism |                                             | Added based on annotation from KEGG                                                                                                                                                                                              | 4.2.1.35  |

| SEED Rxn ID | BIGG Rxn ID      | Function                                                   | Formula                                            | Rev | GA                                                                          | LB | UB   | CS | Subsystem                  | Reference                                   | Notes                                                                                                                                                                                                                                                                                        | EC Number |
|-------------|------------------|------------------------------------------------------------|----------------------------------------------------|-----|-----------------------------------------------------------------------------|----|------|----|----------------------------|---------------------------------------------|----------------------------------------------------------------------------------------------------------------------------------------------------------------------------------------------------------------------------------------------------------------------------------------------|-----------|
|             | 3DSPHR           | 3-Dehydrosphinganine reductase                             | h[c] + nadph[c] + 3dsphgn[c] => nadp[c] + sphgn[c] | 0   |                                                                             | 0  | 1000 | 2  | Sphingolipid Metabolism    | PMID:16887518, PMID:20855611                | Bacteroides are well established to produce sphingolipids. However, no homolog of human 3DSPHR was found in Bacteroides species. Either Bacteroides have structural homologs of this enzyme, which are not revealed by BLASTP search, or sphingolipids are synthesized by another mechanism. | 1.1.1.102 |
|             | 3FUCLAC_FUCA SEe | alpha-fucosidase, 3-fucosyllactose (extracellular)         | h2o[e] + 3fuclac[e] => fuc-L[e] + lcts[e]          | 0   | ((BT_1625 or BT_4136) and ((BT_4134 and BT_4135) or (BT_1630 and BT_1631))) | 0  | 1000 | 4  | HMO Degradation            | PMID: 22036470                              | B. thetaiotaomicron grows on human milk oligosaccharides (HMOs); numerous glycosidase hydrolases are upregulated during growth on HMOs. Involves alpha-fucosidase and susC/ SusD (binding proteins).                                                                                         | 3.2.1.51  |
|             | 3HACPR1          | 3-hydroxyacyl-ACP-dehydratase (FabZ)                       | 3hgACPm[c] => h2o[c] + egACPm[c]                   | 0   | BT_4206                                                                     | 0  | 1000 | 3  | Biotin Metabolism          | PMID:20693992                               | Based on biotin synthesis described in PMID:20693992 for E. coli.                                                                                                                                                                                                                            |           |
|             | 3HACPR2          | 3-hydroxyacyl-ACP-dehydratase (FabZ)                       | 3hpACPm[c] => h2o[c] + epACPm[c]                   | 0   | BT_4206                                                                     | 0  | 1000 | 3  | Biotin Metabolism          | PMID:20693992                               | Based on biotin synthesis described in PMID:20693992 for E. coli                                                                                                                                                                                                                             |           |
| rxn05333    | 3HAD100          | 3-hydroxyacyl-[acyl-carrier-protein] dehydratase (n-C10:0) | 3hdecACP[c] => h2o[c] + tdec2eACP[c]               | 0   | BT_4206                                                                     | 0  | 1000 | 3  | Cell Envelope Biosynthesis | PMID: 6102980, PMID: 7440508, PMID: 7204330 | The fatty acid composition of B. thetaiotaomicron was determined experimentally.                                                                                                                                                                                                             | 4.2.1.61  |

| SEED Rxn ID | BIGG Rxn ID | Function                                                   | Formula                                        | Rev | GA      | LB | UB   | CS | Subsystem                  | Reference                                   | Notes                                                                                                                                                                                                                            | EC Number |
|-------------|-------------|------------------------------------------------------------|------------------------------------------------|-----|---------|----|------|----|----------------------------|---------------------------------------------|----------------------------------------------------------------------------------------------------------------------------------------------------------------------------------------------------------------------------------|-----------|
| rxn05423    | 3HAD10M11   | 10-methyl-3-hydroxy-undecanoyl-ACP hydro-lyase             | 10m3hundecACP[c] => h2o[c] + 10mtundec2eACP[c] | 0   | BT_4206 | 0  | 1000 | 3  | Cell Envelope Biosynthesis | PMID: 6102980, PMID: 7440508, PMID: 7204330 | Added manually to BIGG database based on reaction mechanism proposed by Model SEED. This reaction is involved in fatty acid biosynthesis. B. thetaiotaomicron is well known to synthesize iso- and anteiso-branched fatty acids. | 4.2.1.61  |
| rxn05373    | 3HAD10M12   | 10-methyl-3-hydroxy-dodecanoyl-ACP hydro-lyase             | 10m3hddcaACP[c] => h2o[c] + 10mtddec2eACP[c]   | 0   | BT_4206 | 0  | 1000 | 3  | Cell Envelope Biosynthesis | PMID: 6102980, PMID: 7440508, PMID: 7204330 | Added manually to BIGG database based on reaction mechanism proposed by Model SEED. This reaction is involved in fatty acid biosynthesis. B. thetaiotaomicron is well known to synthesize iso- and anteiso-branched fatty acids. | 4.2.1.61  |
| rxn05398    | 3HAD11M12   | 11-methyl-3-hydroxy-dodecanoyl-ACP hydro-lyase             | 11m3hddcaACP[c] => h2o[c] + 11mtddec2eACP[c]   | 0   | BT_4206 | 0  | 1000 | 3  | Cell Envelope Biosynthesis | PMID: 6102980, PMID: 7440508, PMID: 7204330 | Added manually to BIGG database based on reaction mechanism proposed by Model SEED. This reaction is involved in fatty acid biosynthesis. B. thetaiotaomicron is well known to synthesize iso- and anteiso-branched fatty acids. | 4.2.1.61  |
| rxn05331    | 3HAD120     | 3-hydroxyacyl-[acyl-carrier-protein] dehydratase (n-C12:0) | 3hddecACP[c] => h2o[c] + tddec2eACP[c]         | 0   | BT_4206 | 0  | 1000 | 3  | Cell Envelope Biosynthesis | PMID: 6102980, PMID: 7440508, PMID: 7204330 | The fatty acid composition of B. thetaiotaomicron was determined experimentally.                                                                                                                                                 | 4.2.1.61  |

| SEED Rxn ID | BIGG Rxn ID | Function                                                   | Formula                                          | Rev | GA      | LB | UB   | CS | Subsystem                  | Reference                                   | Notes                                                                                                                                                                                                                            | EC Number |
|-------------|-------------|------------------------------------------------------------|--------------------------------------------------|-----|---------|----|------|----|----------------------------|---------------------------------------------|----------------------------------------------------------------------------------------------------------------------------------------------------------------------------------------------------------------------------------|-----------|
|             | 3HAD121     | 3-hydroxyacyl-[acyl-carrier-protein] dehydratase (n-C12:1) | 3hcddec5eACP[c] => h2o[c] + t3c5ddeceACP[c]      | 0   | BT_4206 | 0  | 1000 | 3  | Cell Envelope Biosynthesis | PMID: 6102980, PMID: 7440508, PMID: 7204330 | The fatty acid composition of B. thetaiotaomicron was determined experimentally.                                                                                                                                                 | 4.2.1.61  |
| rxn05427    | 3HAD12M13   | 12-methyl-3-hydroxy-tridecanoyl-ACP hydro-lyase            | 12m3htridecACP[c] => h2o[c] + 12mttritec2eACP[c] | 0   | BT_4206 | 0  | 1000 | 3  | Cell Envelope Biosynthesis | PMID: 6102980, PMID: 7440508, PMID: 7204330 | Added manually to BIGG database based on reaction mechanism proposed by Model SEED. This reaction is involved in fatty acid biosynthesis. B. thetaiotaomicron is well known to synthesize iso- and anteiso-branched fatty acids. | 4.2.1.61  |
| rxn05377    | 3HAD12M14   | 12-methyl-3-hydroxy-tetra-decanoyl-ACP hydro-lyase         | 12m3hmyrsACP[c] => h2o[c] + 12mtmrs2eACP[c]      | 0   | BT_4206 | 0  | 1000 | 3  | Cell Envelope Biosynthesis | PMID: 6102980, PMID: 7440508, PMID: 7204330 | Added manually to BIGG database based on reaction mechanism proposed by Model SEED. This reaction is involved in fatty acid biosynthesis. B. thetaiotaomicron is well known to synthesize iso- and anteiso-branched fatty acids. | 4.2.1.61  |
| rxn05402    | 3HAD13M14   | 13-methyl-3-hydroxy-tetra-decanoyl-ACP hydro-lyase         | 13m3hmyrsACP[c] => h2o[c] + 13mtmrs2eACP[c]      | 0   | BT_4206 | 0  | 1000 | 3  | Cell Envelope Biosynthesis | PMID: 6102980, PMID: 7440508, PMID: 7204330 | Added manually to BIGG database based on reaction mechanism proposed by Model SEED. This reaction is involved in fatty acid biosynthesis. B. thetaiotaomicron is well known to synthesize iso- and anteiso-branched fatty acids. | 4.2.1.61  |

| SEED Rxn ID | BIGG Rxn ID | Function                                                   | Formula                                            | Rev | GA      | LB | UB   | CS | Subsystem                  | Reference                                   | Notes                                                                                                                                                                                                                            | EC Number |
|-------------|-------------|------------------------------------------------------------|----------------------------------------------------|-----|---------|----|------|----|----------------------------|---------------------------------------------|----------------------------------------------------------------------------------------------------------------------------------------------------------------------------------------------------------------------------------|-----------|
| rxn05335    | 3HAD140     | 3-hydroxyacyl-[acyl-carrier-protein] dehydratase (n-C14:0) | 3hmrsACP[c] => h2o[c] + tmrs2eACP[c]               | 0   | BT_4206 | 0  | 1000 | 3  | Cell Envelope Biosynthesis | PMID: 6102980, PMID: 7440508, PMID: 7204330 | The fatty acid composition of B. thetaiotaomicron was determined experimentally.                                                                                                                                                 | 4.2.1.61  |
|             | 3HAD141     | 3-hydroxyacyl-[acyl-carrier-protein] dehydratase (n-C14:1) | 3hcmrs7eACP[c] => h2o[c] + t3c7mrseACP[c]          | 0   | BT_4206 | 0  | 1000 | 3  | Cell Envelope Biosynthesis | PMID: 6102980, PMID: 7440508, PMID: 7204330 | The fatty acid composition of B. thetaiotaomicron was determined experimentally.                                                                                                                                                 | 4.2.1.61  |
| rxn05431    | 3HAD14M15   | 14-methyl-3-hydroxy-pentadecanoyl-ACP hydro-lyase          | 14m3hpentdecACP[c] => h2o[c] + 14mtpentdec2eACP[c] | 0   | BT_4206 | 0  | 1000 | 3  | Cell Envelope Biosynthesis | PMID: 6102980, PMID: 7440508, PMID: 7204330 | Added manually to BIGG database based on reaction mechanism proposed by Model SEED. This reaction is involved in fatty acid biosynthesis. B. thetaiotaomicron is well known to synthesize iso- and anteiso-branched fatty acids. | 4.2.1.61  |
| rxn05381    | 3HAD14M16   | 14-methyl-3-hydroxy-hexa-decanoyl-ACP hydro-lyase          | 14m3hpalmACP[c] => h2o[c] + 14mtpalm2eACP[c]       | 0   | BT_4206 | 0  | 1000 | 3  | Cell Envelope Biosynthesis | PMID: 6102980, PMID: 7440508, PMID: 7204330 | Added manually to BIGG database based on reaction mechanism proposed by Model SEED. This reaction is involved in fatty acid biosynthesis. B. thetaiotaomicron is well known to synthesize iso- and anteiso-branched fatty acids. | 4.2.1.61  |

| SEED Rxn ID | BIGG Rxn ID | Function                                                   | Formula                                      | Rev | GA      | LB | UB   | CS | Subsystem                  | Reference                                   | Notes                                                                                                                                                                                                                            | EC Number |
|-------------|-------------|------------------------------------------------------------|----------------------------------------------|-----|---------|----|------|----|----------------------------|---------------------------------------------|----------------------------------------------------------------------------------------------------------------------------------------------------------------------------------------------------------------------------------|-----------|
| rxn05406    | 3HAD15M16   | 15-methyl-3-hydroxy-hexa-decanoyl-ACP hydro-lyase          | 15m3hpalmACP[c] => h2o[c] + 15mtpalm2eACP[c] | 0   | BT_4206 | 0  | 1000 | 3  | Cell Envelope Biosynthesis | PMID: 6102980, PMID: 7440508, PMID: 7204330 | Added manually to BIGG database based on reaction mechanism proposed by Model SEED. This reaction is involved in fatty acid biosynthesis. B. thetaiotaomicron is well known to synthesize iso- and anteiso-branched fatty acids. | 4.2.1.61  |
| rxn05332    | 3HAD160     | 3-hydroxyacyl-[acyl-carrier-protein] dehydratase (n-C16:0) | 3hpalmACP[c] => h2o[c] + tpalm2eACP[c]       | 0   | BT_4206 | 0  | 1000 | 3  | Cell Envelope Biosynthesis | PMID: 6102980, PMID: 7440508, PMID: 7204330 | The fatty acid composition of B. thetaiotaomicron was determined experimentally.                                                                                                                                                 | 4.2.1.61  |
|             | 3HAD161     | 3-hydroxyacyl-[acyl-carrier-protein] dehydratase (n-C16:1) | 3hcpalm9eACP[c] => h2o[c] + t3c9palmeACP[c]  | 0   | BT_4206 | 0  | 1000 | 3  | Cell Envelope Biosynthesis | PMID: 6102980, PMID: 7440508, PMID: 7204330 | The fatty acid composition of B. thetaiotaomicron was determined experimentally.                                                                                                                                                 | 4.2.1.61  |
| rxn05462    | 3HAD180     | 3-hydroxyacyl-[acyl-carrier-protein] dehydratase (n-C18:0) | 3hoctaACP[c] => h2o[c] + toctd2eACP[c]       | 0   | BT_4206 | 0  | 1000 | 3  | Cell Envelope Biosynthesis | PMID: 6102980, PMID: 7440508, PMID: 7204330 | The fatty acid composition of B. thetaiotaomicron was determined experimentally.                                                                                                                                                 | 4.2.1.61  |
|             | 3HAD181     | 3-hydroxyacyl-[acyl-carrier-protein] dehydratase (n-C18:1) | 3hcvac11eACP[c] => h2o[c] + t3c11vaceACP[c]  | 0   | BT_4206 | 0  | 1000 | 3  | Cell Envelope Biosynthesis | PMID: 6102980, PMID: 7440508, PMID: 7204330 | The fatty acid composition of B. thetaiotaomicron was determined experimentally.                                                                                                                                                 | 4.2.1.61  |
| rxn05329    | 3HAD40      | 3-hydroxyacyl-[acyl-carrier-protein] dehydratase (n-C4:0)  | 3haACP[c] => h2o[c] + but2eACP[c]            | 0   | BT_4206 | 0  | 1000 | 3  | Cell Envelope Biosynthesis | PMID: 6102980, PMID: 7440508, PMID: 7204330 | The fatty acid composition of B. thetaiotaomicron was determined experimentally.                                                                                                                                                 | 4.2.1.61  |

| SEED Rxn ID | BIGG Rxn ID | Function                                                     | Formula                                          | Rev | GA      | LB | UB   | CS | Subsystem                     | Reference                                         | Notes                                                                                                                                                                                                                                                                | EC Number |
|-------------|-------------|--------------------------------------------------------------|--------------------------------------------------|-----|---------|----|------|----|-------------------------------|---------------------------------------------------|----------------------------------------------------------------------------------------------------------------------------------------------------------------------------------------------------------------------------------------------------------------------|-----------|
| rxn05411    | 3HAD4M5     | 4-methyl-3-hydroxy-pentanoyl-ACP hydro-lyase                 | 4m3hpentACP[c]<br>=> h2o[c] +<br>4mtpent2eACP[c] | 0   | BT_4206 | 0  | 1000 | 3  | Cell Envelope<br>Biosynthesis | PMID: 6102980,<br>PMID: 7440508,<br>PMID: 7204330 | Added manually to<br>BIGG database based<br>on reaction<br>mechanism proposed<br>by Model SEED.<br>This reaction is<br>involved in fatty acid<br>biosynthesis. B.<br>thetaiotaomicron is<br>well known to<br>synthesize iso- and<br>anteiso-branched<br>fatty acids. | 4.2.1.61  |
| rxn05361    | 3HAD4M6     | 4-methyl-3-hydroxy-hexanoyl-ACP hydro-lyase                  | 4m3hhexACP[c]<br>=> h2o[c] +<br>4mthex2eACP[c]   | 0   | BT_4206 | 0  | 1000 | 3  | Cell Envelope<br>Biosynthesis | PMID: 6102980,<br>PMID: 7440508,<br>PMID: 7204330 | Added manually to<br>BIGG database based<br>on reaction<br>mechanism proposed<br>by Model SEED.<br>This reaction is<br>involved in fatty acid<br>biosynthesis. B.<br>thetaiotaomicron is<br>well known to<br>synthesize iso- and<br>anteiso-branched<br>fatty acids. | 4.2.1.61  |
| rxn05386    | 3HAD5M6     | 5-methyl-3-hydroxy-hexanoyl-ACP hydro-lyase                  | 5m3hhexACP[c]<br>=> h2o[c] +<br>5mthex2eACP[c]   | 0   | BT_4206 | 0  | 1000 | 3  | Cell Envelope<br>Biosynthesis | PMID: 6102980,<br>PMID: 7440508,<br>PMID: 7204330 | Added manually to<br>BIGG database based<br>on reaction<br>mechanism proposed<br>by Model SEED.<br>This reaction is<br>involved in fatty acid<br>biosynthesis. B.<br>thetaiotaomicron is<br>well known to<br>synthesize iso- and<br>anteiso-branched<br>fatty acids. | 4.2.1.61  |
| rxn05330    | 3HAD60      | 3-hydroxyacyl-[acyl-carrier-protein]<br>dehydratase (n-C6:0) | 3hhexACP[c]<br>=> h2o[c] +<br>thex2eACP[c]       | 0   | BT_4206 | 0  | 1000 | 3  | Cell Envelope<br>Biosynthesis | PMID: 6102980,<br>PMID: 7440508,<br>PMID: 7204330 | The fatty acid<br>composition of B.<br>thetaiotaomicron was<br>determined<br>experimentally.                                                                                                                                                                         | 4.2.1.61  |

| SEED Rxn ID | BIGG Rxn ID | Function                                                     | Formula                                          | Rev | GA      | LB | UB   | CS | Subsystem                     | Reference                                         | Notes                                                                                                                                                                                                                                                                | EC Number |
|-------------|-------------|--------------------------------------------------------------|--------------------------------------------------|-----|---------|----|------|----|-------------------------------|---------------------------------------------------|----------------------------------------------------------------------------------------------------------------------------------------------------------------------------------------------------------------------------------------------------------------------|-----------|
| rxn05415    | 3HAD6M7     | 6-methyl-3-hydroxy-heptanoyl-ACP hydro-lyase                 | 6m3hheptACP[c]<br>=> h2o[c] +<br>6mthept2eACP[c] | 0   | BT_4206 | 0  | 1000 | 3  | Cell Envelope<br>Biosynthesis | PMID: 6102980,<br>PMID: 7440508,<br>PMID: 7204330 | Added manually to<br>BIGG database based<br>on reaction<br>mechanism proposed<br>by Model SEED.<br>This reaction is<br>involved in fatty acid<br>biosynthesis. B.<br>thetaiotaomicron is<br>well known to<br>synthesize iso- and<br>anteiso-branched<br>fatty acids. | 4.2.1.61  |
| rxn05365    | 3HAD6M8     | 6-methyl-3-hydroxy-octanoyl-ACP hydro-lyase                  | 6m3hocACP[c]<br>=> h2o[c] +<br>6mtoct2eACP[c]    | 0   | BT_4206 | 0  | 1000 | 3  | Cell Envelope<br>Biosynthesis | PMID: 6102980,<br>PMID: 7440508,<br>PMID: 7204330 | Added manually to<br>BIGG database based<br>on reaction<br>mechanism proposed<br>by Model SEED.<br>This reaction is<br>involved in fatty acid<br>biosynthesis. B.<br>thetaiotaomicron is<br>well known to<br>synthesize iso- and<br>anteiso-branched<br>fatty acids. | 4.2.1.61  |
| rxn05390    | 3HAD7M8     | 7-methyl-3-hydroxy-octanoyl-ACP hydro-lyase                  | 7m3hocACP[c]<br>=> h2o[c] +<br>7mtoct2eACP[c]    | 0   | BT_4206 | 0  | 1000 | 3  | Cell Envelope<br>Biosynthesis | PMID: 6102980,<br>PMID: 7440508,<br>PMID: 7204330 | Added manually to<br>BIGG database based<br>on reaction<br>mechanism proposed<br>by Model SEED.<br>This reaction is<br>involved in fatty acid<br>biosynthesis. B.<br>thetaiotaomicron is<br>well known to<br>synthesize iso- and<br>anteiso-branched<br>fatty acids. | 4.2.1.61  |
| rxn05334    | 3HAD80      | 3-hydroxyacyl-[acyl-carrier-protein]<br>dehydratase (n-C8:0) | 3hoctACP[c] =><br>h2o[c] +<br>toct2eACP[c]       | 0   | BT_4206 | 0  | 1000 | 3  | Cell Envelope<br>Biosynthesis | PMID: 6102980,<br>PMID: 7440508,<br>PMID: 7204330 | The fatty acid<br>composition of B.<br>thetaiotaomicron was<br>determined<br>experimentally.                                                                                                                                                                         | 4.2.1.61  |

| SEED Rxn ID | BIGG Rxn ID | Function                                    | Formula                                         | Rev | GA      | LB | UB   | CS | Subsystem                     | Reference                                         | Notes                                                                                                                                                                                                                                                                | EC Number |
|-------------|-------------|---------------------------------------------|-------------------------------------------------|-----|---------|----|------|----|-------------------------------|---------------------------------------------------|----------------------------------------------------------------------------------------------------------------------------------------------------------------------------------------------------------------------------------------------------------------------|-----------|
| rxn05369    | 3HAD8M10    | 8-methyl-3-hydroxy-decanoyl-ACP hydro-lyase | 8m3hdcaACP[c]<br>=> h2o[c] +<br>8mtdec2eACP[c]  | 0   | BT_4206 | 0  | 1000 | 3  | Cell Envelope<br>Biosynthesis | PMID: 6102980,<br>PMID: 7440508,<br>PMID: 7204330 | Added manually to<br>BIGG database based<br>on reaction<br>mechanism proposed<br>by Model SEED.<br>This reaction is<br>involved in fatty acid<br>biosynthesis. B.<br>thetaiotaomicron is<br>well known to<br>synthesize iso- and<br>anteiso-branched<br>fatty acids. | 4.2.1.61  |
| rxn05419    | 3HAD8M9     | 8-methyl-3-hydroxy-nonanoyl-ACP hydro-lyase | 8m3hnnonACP[c]<br>=> h2o[c] +<br>8mtnon2eACP[c] | 0   | BT_4206 | 0  | 1000 | 3  | Cell Envelope<br>Biosynthesis | PMID: 6102980,<br>PMID: 7440508,<br>PMID: 7204330 | Added manually to<br>BIGG database based<br>on reaction<br>mechanism proposed<br>by Model SEED.<br>This reaction is<br>involved in fatty acid<br>biosynthesis. B.<br>thetaiotaomicron is<br>well known to<br>synthesize iso- and<br>anteiso-branched<br>fatty acids. | 4.2.1.61  |
| rxn05394    | 3HAD9M10    | 9-methyl-3-hydroxy-decanoyl-ACP hydro-lyase | 9m3hdcaACP[c]<br>=> h2o[c] +<br>9mtdec2eACP[c]  | 0   | BT_4206 | 0  | 1000 | 3  | Cell Envelope<br>Biosynthesis | PMID: 6102980,<br>PMID: 7440508,<br>PMID: 7204330 | Added manually to<br>BIGG database based<br>on reaction<br>mechanism proposed<br>by Model SEED.<br>This reaction is<br>involved in fatty acid<br>biosynthesis. B.<br>thetaiotaomicron is<br>well known to<br>synthesize iso- and<br>anteiso-branched<br>fatty acids. | 4.2.1.61  |

| SEED Rxn ID | BIGG Rxn ID | Function                                             | Formula                                                           | Rev | GA                   | LB    | UB   | CS | Subsystem                  | Reference                                   | Notes                                                                                                                                                                                                                            | EC Number |
|-------------|-------------|------------------------------------------------------|-------------------------------------------------------------------|-----|----------------------|-------|------|----|----------------------------|---------------------------------------------|----------------------------------------------------------------------------------------------------------------------------------------------------------------------------------------------------------------------------------|-----------|
|             | 3OAAACPR1   | 3-ketoacyl-ACP-reductase (FabG)                      | h[c] + nadph[c] + 3ogACPM[c] => nadp[c] + 3hgACPM[c]              | 0   | BT_0409              | 0     | 1000 | 3  | Biotin Metabolism          | PMID:20693992                               | Based on biotin synthesis described in PMID:20693992 for E. coli. BT_0409 was considered the most likely putatively annotated gene for FabG.                                                                                     |           |
|             | 3OAAACPR2   | 3-ketoacyl-ACP-reductase (FabG)                      | h[c] + nadph[c] + 3opACPM[c] => nadp[c] + 3hpACPM[c]              | 0   | BT_0409              | 0     | 1000 | 3  | Biotin Metabolism          | PMID:20693992                               | Based on biotin synthesis described in PMID:20693992 for E. coli. BT_0409 was considered the most likely putatively annotated gene for FabG.                                                                                     |           |
| rxn05338    | 3OAR100     | 3-oxoacyl-[acyl-carrier-protein] reductase (n-C10:0) | h[c] + nadph[c] + 3odecACP[c] <=> nadp[c] + 3hdecACP[c]           | 1   | (BT_0972 or BT_2380) | -1000 | 1000 | 3  | Cell Envelope Biosynthesis | PMID: 6102980, PMID: 7440508, PMID: 7204330 | The fatty acid composition of B. thetaiotaomicron was determined experimentally.                                                                                                                                                 | 1.1.1.100 |
| rxn05422    | 3OAR10M11   | 10-methyl-3-oxo-undecanoyl-ACPNADP+ oxidoreductase   | h[c] + nadph[c] + 10m3oundecACP[c] <=> nadp[c] + 10m3hundecACP[c] | 1   | (BT_0972 or BT_2380) | -1000 | 1000 | 3  | Cell Envelope Biosynthesis | PMID: 6102980, PMID: 7440508, PMID: 7204330 | Added manually to BIGG database based on reaction mechanism proposed by Model SEED. This reaction is involved in fatty acid biosynthesis. B. thetaiotaomicron is well known to synthesize iso- and anteiso-branched fatty acids. | 1.1.1.100 |

| SEED Rxn ID | BIGG Rxn ID | Function                                                        | Formula                                                         | Rev | GA                   | LB    | UB   | CS | Subsystem                  | Reference                                   | Notes                                                                                                                                                                                                                            | EC Number |
|-------------|-------------|-----------------------------------------------------------------|-----------------------------------------------------------------|-----|----------------------|-------|------|----|----------------------------|---------------------------------------------|----------------------------------------------------------------------------------------------------------------------------------------------------------------------------------------------------------------------------------|-----------|
| rxn05372    | 3OAR10M12   | 10-methyl-3-oxo-dodecanoyl-ACP NADP <sup>+</sup> oxidoreductase | h[c] + nadph[c] + 10m3oddcaACP[c] <=> nadp[c] + 10m3hddcaACP[c] | 1   | (BT_0972 or BT_2380) | -1000 | 1000 | 3  | Cell Envelope Biosynthesis | PMID: 6102980, PMID: 7440508, PMID: 7204330 | Added manually to BIGG database based on reaction mechanism proposed by Model SEED. This reaction is involved in fatty acid biosynthesis. B. thetaiotaomicron is well known to synthesize iso- and anteiso-branched fatty acids. | 1.1.1.100 |
| rxn05397    | 3OAR11M12   | 11-methyl-3-oxo-dodecanoyl-ACP NADP <sup>+</sup> oxidoreductase | h[c] + nadph[c] + 11m3oddcaACP[c] <=> nadp[c] + 11m3hddcaACP[c] | 1   | (BT_0972 or BT_2380) | -1000 | 1000 | 3  | Cell Envelope Biosynthesis | PMID: 6102980, PMID: 7440508, PMID: 7204330 | Added manually to BIGG database based on reaction mechanism proposed by Model SEED. This reaction is involved in fatty acid biosynthesis. B. thetaiotaomicron is well known to synthesize iso- and anteiso-branched fatty acids. | 1.1.1.100 |
| rxn05340    | 3OAR120     | 3-oxoacyl-[acyl-carrier-protein] reductase (n-C12:0)            | h[c] + nadph[c] + 3oddecACP[c] <=> nadp[c] + 3hddecACP[c]       | 1   | (BT_0972 or BT_2380) | -1000 | 1000 | 3  | Cell Envelope Biosynthesis | PMID: 6102980, PMID: 7440508, PMID: 7204330 | The fatty acid composition of B. thetaiotaomicron was determined experimentally.                                                                                                                                                 | 1.1.1.100 |
|             | 3OAR121     | 3-oxoacyl-[acyl-carrier-protein] reductase (n-C12:1)            | h[c] + nadph[c] + 3ocddec5eACP[c] => nadp[c] + 3hcddec5eACP[c]  | 0   | (BT_0972 or BT_2380) | 0     | 1000 | 3  | Cell Envelope Biosynthesis | PMID: 6102980, PMID: 7440508, PMID: 7204330 | The fatty acid composition of B. thetaiotaomicron was determined experimentally.                                                                                                                                                 | 1.1.1.100 |

| SEED Rxn ID | BIGG Rxn ID | Function                                                           | Formula                                                             | Rev | GA                   | LB    | UB   | CS | Subsystem                  | Reference                                   | Notes                                                                                                                                                                                                                            | EC Number |
|-------------|-------------|--------------------------------------------------------------------|---------------------------------------------------------------------|-----|----------------------|-------|------|----|----------------------------|---------------------------------------------|----------------------------------------------------------------------------------------------------------------------------------------------------------------------------------------------------------------------------------|-----------|
| rxn05426    | 3OAR12M13   | 12-methyl-3-oxo-tridecanoyl-ACP NADP <sup>+</sup> oxidoreductase   | h[c] + nadph[c] + 12m3otridecACP[c] <=> nadp[c] + 12m3htridecACP[c] | 1   | (BT_0972 or BT_2380) | -1000 | 1000 | 3  | Cell Envelope Biosynthesis | PMID: 6102980, PMID: 7440508, PMID: 7204330 | Added manually to BIGG database based on reaction mechanism proposed by Model SEED. This reaction is involved in fatty acid biosynthesis. B. thetaiotaomicron is well known to synthesize iso- and anteiso-branched fatty acids. | 1.1.1.100 |
| rxn05376    | 3OAR12M14   | 12-methyl-3-oxo-tetradecanoyl-ACP NADP <sup>+</sup> oxidoreductase | h[c] + nadph[c] + 12m3omyrsACP[c] <=> nadp[c] + 12m3hmyrsACP[c]     | 1   | (BT_0972 or BT_2380) | -1000 | 1000 | 3  | Cell Envelope Biosynthesis | PMID: 6102980, PMID: 7440508, PMID: 7204330 | Added manually to BIGG database based on reaction mechanism proposed by Model SEED. This reaction is involved in fatty acid biosynthesis. B. thetaiotaomicron is well known to synthesize iso- and anteiso-branched fatty acids. | 1.1.1.100 |
| rxn05401    | 3OAR13M14   | 13-methyl-3-oxo-tetradecanoyl-ACP NADP <sup>+</sup> oxidoreductase | h[c] + nadph[c] + 13m3omyrsACP[c] <=> nadp[c] + 13m3hmyrsACP[c]     | 1   | (BT_0972 or BT_2380) | -1000 | 1000 | 3  | Cell Envelope Biosynthesis | PMID: 6102980, PMID: 7440508, PMID: 720433  | Added manually to BIGG database based on reaction mechanism proposed by Model SEED. This reaction is involved in fatty acid biosynthesis. B. thetaiotaomicron is well known to synthesize iso- and anteiso-branched fatty acids. | 1.1.1.100 |
| rxn05342    | 3OAR140     | 3-oxoacyl-[acyl-carrier-protein] reductase (n-C14:0)               | h[c] + nadph[c] + 3omrsACP[c] <=> nadp[c] + 3hmrsACP[c]             | 1   | (BT_0972 or BT_2380) | -1000 | 1000 | 3  | Cell Envelope Biosynthesis | PMID: 6102980, PMID: 7440508, PMID: 7204330 | The fatty acid composition of B. thetaiotaomicron was determined experimentally.                                                                                                                                                 | 1.1.1.100 |

| SEED Rxn ID | BIGG Rxn ID | Function                                              | Formula                                                               | Rev | GA                   | LB    | UB   | CS | Subsystem                  | Reference                                   | Notes                                                                                                                                                                                                                            | EC Number |
|-------------|-------------|-------------------------------------------------------|-----------------------------------------------------------------------|-----|----------------------|-------|------|----|----------------------------|---------------------------------------------|----------------------------------------------------------------------------------------------------------------------------------------------------------------------------------------------------------------------------------|-----------|
|             | 3OAR141     | 3-oxoacyl-[acyl-carrier-protein] reductase (n-C14:1)  | h[c] + nadph[c] + 3ocmrs7eACP[c] => nadp[c] + 3hcmrs7eACP[c]          | 0   | (BT_0972 or BT_2380) | 0     | 1000 | 3  | Cell Envelope Biosynthesis | PMID: 6102980, PMID: 7440508, PMID: 7204330 | The fatty acid composition of B. thetaiotaomicron was determined experimentally.                                                                                                                                                 | 1.1.1.100 |
| rxn05430    | 3OAR14M15   | 14-methyl-3-oxo-pentadecanoyl-ACPNADP+ oxidoreductase | h[c] + nadph[c] + 14m3opentdecACP[c] <=> nadp[c] + 14m3hpentdecACP[c] | 1   | (BT_0972 or BT_2380) | -1000 | 1000 | 3  | Cell Envelope Biosynthesis | PMID: 6102980, PMID: 7440508, PMID: 7204330 | Added manually to BIGG database based on reaction mechanism proposed by Model SEED. This reaction is involved in fatty acid biosynthesis. B. thetaiotaomicron is well known to synthesize iso- and anteiso-branched fatty acids. | 1.1.1.100 |
| rxn05380    | 3OAR14M16   | 14-methyl-3-oxo-hexadecanoyl-ACPNADP+ oxidoreductase  | h[c] + nadph[c] + 14m3opalmACP[c] <=> nadp[c] + 14m3hpalmACP[c]       | 1   | (BT_0972 or BT_2380) | -1000 | 1000 | 3  | Cell Envelope Biosynthesis | PMID: 6102980, PMID: 7440508, PMID: 7204330 | Added manually to BIGG database based on reaction mechanism proposed by Model SEED. This reaction is involved in fatty acid biosynthesis. B. thetaiotaomicron is well known to synthesize iso- and anteiso-branched fatty acids. | 1.1.1.100 |
| rxn05405    | 3OAR15M16   | 15-methyl-3-oxo-hexadecanoyl-ACPNADP+ oxidoreductase  | h[c] + nadph[c] + 15m3opalmACP[c] <=> nadp[c] + 15m3hpalmACP[c]       | 1   | (BT_0972 or BT_2380) | -1000 | 1000 | 3  | Cell Envelope Biosynthesis | PMID: 6102980, PMID: 7440508, PMID: 7204330 | Added manually to BIGG database based on reaction mechanism proposed by Model SEED. This reaction is involved in fatty acid biosynthesis. B. thetaiotaomicron is well known to synthesize iso- and anteiso-branched fatty acids. | 1.1.1.100 |

| SEED Rxn ID | BIGG Rxn ID | Function                                             | Formula                                                        | Rev | GA                   | LB    | UB   | CS | Subsystem                  | Reference                                   | Notes                                                                                                                                                                                                                            | EC Number |
|-------------|-------------|------------------------------------------------------|----------------------------------------------------------------|-----|----------------------|-------|------|----|----------------------------|---------------------------------------------|----------------------------------------------------------------------------------------------------------------------------------------------------------------------------------------------------------------------------------|-----------|
| rxn05336    | 3OAR160     | 3-oxoacyl-[acyl-carrier-protein] reductase (n-C16:0) | h[c] + nadph[c] + 3opalmACP[c] <=> nadp[c] + 3hpalmACP[c]      | 1   | (BT_0972 or BT_2380) | -1000 | 1000 | 3  | Cell Envelope Biosynthesis | PMID: 6102980, PMID: 7440508, PMID: 7204330 | The fatty acid composition of B. thetaiotaomicron was determined experimentally.                                                                                                                                                 | 1.1.1.100 |
|             | 3OAR161     | 3-oxoacyl-[acyl-carrier-protein] reductase (n-C16:1) | h[c] + nadph[c] + 3ocpalm9eACP[c] => nadp[c] + 3hcpalm9eACP[c] | 0   | (BT_0972 or BT_2380) | 0     | 1000 | 3  | Cell Envelope Biosynthesis | PMID: 6102980, PMID: 7440508, PMID: 7204330 | The fatty acid composition of B. thetaiotaomicron was determined experimentally.                                                                                                                                                 | 1.1.1.100 |
| rxn05461    | 3OAR180     | 3-oxoacyl-[acyl-carrier-protein] reductase (n-C18:0) | h[c] + nadph[c] + 3oocdACP[c] <=> nadp[c] + 3hocdACP[c]        | 1   | (BT_0972 or BT_2380) | -1000 | 1000 | 3  | Cell Envelope Biosynthesis | PMID: 6102980, PMID: 7440508, PMID: 7204330 | The fatty acid composition of B. thetaiotaomicron was determined experimentally.                                                                                                                                                 | 1.1.1.100 |
|             | 3OAR181     | 3-oxoacyl-[acyl-carrier-protein] reductase (n-C18:1) | h[c] + nadph[c] + 3ocvac11eACP[c] => nadp[c] + 3hevac11eACP[c] | 0   | (BT_0972 or BT_2380) | 0     | 1000 | 3  | Cell Envelope Biosynthesis | PMID: 6102980, PMID: 7440508, PMID: 7204330 | The fatty acid composition of B. thetaiotaomicron was determined experimentally.                                                                                                                                                 | 1.1.1.100 |
| rxn05339    | 3OAR40      | 3-oxoacyl-[acyl-carrier-protein] reductase (n-C4:0)  | h[c] + nadph[c] + actACP[c] <=> nadp[c] + 3haACP[c]            | 1   | (BT_0972 or BT_2380) | -1000 | 1000 | 3  | Cell Envelope Biosynthesis | PMID: 6102980, PMID: 7440508, PMID: 7204330 | The fatty acid composition of B. thetaiotaomicron was determined experimentally.                                                                                                                                                 | 1.1.1.100 |
| rxn05410    | 3OAR4M5     | 4-methyl-3-oxo-pentanoyl-ACPNADP+ oxidoreductase     | h[c] + nadph[c] + 4m3opentACP[c] <=> nadp[c] + 4m3hpentACP[c]  | 1   | (BT_0972 or BT_2380) | -1000 | 1000 | 3  | Cell Envelope Biosynthesis | PMID: 6102980, PMID: 7440508, PMID: 7204330 | Added manually to BIGG database based on reaction mechanism proposed by Model SEED. This reaction is involved in fatty acid biosynthesis. B. thetaiotaomicron is well known to synthesize iso- and anteiso-branched fatty acids. | 1.1.1.100 |

| SEED Rxn ID | BIGG Rxn ID | Function                                            | Formula                                                       | Rev | GA                   | LB    | UB   | CS | Subsystem                  | Reference                                   | Notes                                                                                                                                                                                                                            | EC Number |
|-------------|-------------|-----------------------------------------------------|---------------------------------------------------------------|-----|----------------------|-------|------|----|----------------------------|---------------------------------------------|----------------------------------------------------------------------------------------------------------------------------------------------------------------------------------------------------------------------------------|-----------|
| rxn05360    | 3OAR4M6     | 4-methyl-3-oxo-hexanoyl-ACPNADP+ oxidoreductase     | h[c] + nadph[c] + 4m3ohexACP[c] <=> nadp[c] + 4m3hhexACP[c]   | 1   | (BT_0972 or BT_2380) | -1000 | 1000 | 3  | Cell Envelope Biosynthesis | PMID: 6102980, PMID: 7440508, PMID: 7204330 | Added manually to BIGG database based on reaction mechanism proposed by Model SEED. This reaction is involved in fatty acid biosynthesis. B. thetaiotaomicron is well known to synthesize iso- and anteiso-branched fatty acids. | 1.1.1.100 |
| rxn05385    | 3OAR5M6     | 5-methyl-3-oxo-hexanoyl-ACPNADP+ oxidoreductase     | h[c] + nadph[c] + 5m3ohexACP[c] <=> nadp[c] + 5m3hhexACP[c]   | 1   | (BT_0972 or BT_2380) | -1000 | 1000 | 3  | Cell Envelope Biosynthesis | PMID: 6102980, PMID: 7440508, PMID: 7204330 | Added manually to BIGG database based on reaction mechanism proposed by Model SEED. This reaction is involved in fatty acid biosynthesis. B. thetaiotaomicron is well known to synthesize iso- and anteiso-branched fatty acids. | 1.1.1.100 |
| rxn05337    | 3OAR60      | 3-oxoacyl-[acyl-carrier-protein] reductase (n-C6:0) | h[c] + nadph[c] + 3ohexACP[c] <=> nadp[c] + 3hhexACP[c]       | 1   | (BT_0972 or BT_2380) | -1000 | 1000 | 3  | Cell Envelope Biosynthesis | PMID: 6102980, PMID: 7440508, PMID: 7204330 | The fatty acid composition of B. thetaiotaomicron was determined experimentally.                                                                                                                                                 | 1.1.1.100 |
| rxn05414    | 3OAR6M7     | 6-methyl-3-oxo-heptanoyl-ACPNADP+ oxidoreductase    | h[c] + nadph[c] + 6m3oheptACP[c] <=> nadp[c] + 6m3hheptACP[c] | 1   | (BT_0972 or BT_2380) | -1000 | 1000 | 3  | Cell Envelope Biosynthesis | PMID: 6102980, PMID: 7440508, PMID: 7204330 | Added manually to BIGG database based on reaction mechanism proposed by Model SEED. This reaction is involved in fatty acid biosynthesis. B. thetaiotaomicron is well known to synthesize iso- and anteiso-branched fatty acids. | 1.1.1.100 |

| SEED Rxn ID | BIGG Rxn ID | Function                                            | Formula                                                     | Rev | GA                   | LB    | UB   | CS | Subsystem                  | Reference                                   | Notes                                                                                                                                                                                                                            | EC Number |
|-------------|-------------|-----------------------------------------------------|-------------------------------------------------------------|-----|----------------------|-------|------|----|----------------------------|---------------------------------------------|----------------------------------------------------------------------------------------------------------------------------------------------------------------------------------------------------------------------------------|-----------|
| rxn05364    | 3OAR6M8     | 6-methyl-3-oxo-octanoyl-ACPNADP+ oxidoreductase     | h[c] + nadph[c] + 6m3oocACP[c] <=> nadp[c] + 6m3hocACP[c]   | 1   | (BT_0972 or BT_2380) | -1000 | 1000 | 3  | Cell Envelope Biosynthesis | PMID: 6102980, PMID: 7440508, PMID: 7204330 | Added manually to BIGG database based on reaction mechanism proposed by Model SEED. This reaction is involved in fatty acid biosynthesis. B. thetaiotaomicron is well known to synthesize iso- and anteiso-branched fatty acids. | 1.1.1.100 |
| rxn05389    | 3OAR7M8     | 7-methyl-3-oxo-octanoyl-ACPNADP+ oxidoreductase     | h[c] + nadph[c] + 7m3oocACP[c] <=> nadp[c] + 7m3hocACP[c]   | 1   | (BT_0972 or BT_2380) | -1000 | 1000 | 3  | Cell Envelope Biosynthesis | PMID: 6102980, PMID: 7440508, PMID: 7204330 | Added manually to BIGG database based on reaction mechanism proposed by Model SEED. This reaction is involved in fatty acid biosynthesis. B. thetaiotaomicron is well known to synthesize iso- and anteiso-branched fatty acids. | 1.1.1.100 |
| rxn05341    | 3OAR80      | 3-oxoacyl-[acyl-carrier-protein] reductase (n-C8:0) | h[c] + nadph[c] + 3oocACP[c] <=> nadp[c] + 3hocACP[c]       | 1   | (BT_0972 or BT_2380) | -1000 | 1000 | 2  | Cell Envelope Biosynthesis | PMID: 6102980, PMID: 7440508, PMID: 7204330 | The fatty acid composition of B. thetaiotaomicron was determined experimentally.                                                                                                                                                 | 1.1.1.100 |
| rxn05368    | 3OAR8M10    | 8-methyl-3-oxo-decanoyl-ACPNADP+ oxidoreductase     | h[c] + nadph[c] + 8m3odcaACP[c] <=> nadp[c] + 8m3hdcaACP[c] | 1   | (BT_0972 or BT_2380) | -1000 | 1000 | 3  | Cell Envelope Biosynthesis | PMID: 6102980, PMID: 7440508, PMID: 7204330 | Added manually to BIGG database based on reaction mechanism proposed by Model SEED. This reaction is involved in fatty acid biosynthesis. B. thetaiotaomicron is well known to synthesize iso- and anteiso-branched fatty acids. | 1.1.1.100 |

| SEED Rxn ID | BIGG Rxn ID | Function                                                                                   | Formula                                                                  | Rev | GA                                               | LB    | UB   | CS | Subsystem                  | Reference                                   | Notes                                                                                                                                                                                                                            | EC Number |
|-------------|-------------|--------------------------------------------------------------------------------------------|--------------------------------------------------------------------------|-----|--------------------------------------------------|-------|------|----|----------------------------|---------------------------------------------|----------------------------------------------------------------------------------------------------------------------------------------------------------------------------------------------------------------------------------|-----------|
| rxn05418    | 3OAR8M9     | 8-methyl-3-oxo-nonanoyl-ACP:NADP+ oxidoreductase                                           | h[c] + nadph[c] + 8m3ononACP[c] <=> nadp[c] + 8m3hnonACP[c]              | 1   | (BT_0972 or BT_2380)                             | -1000 | 1000 | 3  | Cell Envelope Biosynthesis | PMID: 6102980, PMID: 7440508, PMID: 7204330 | Added manually to BIGG database based on reaction mechanism proposed by Model SEED. This reaction is involved in fatty acid biosynthesis. B. thetaiotaomicron is well known to synthesize iso- and anteiso-branched fatty acids. | 1.1.1.100 |
| rxn05393    | 3OAR9M10    | 9-methyl-3-oxo-decanoyl-ACP:NADP+ oxidoreductase                                           | h[c] + nadph[c] + 9m3odcaACP[c] <=> nadp[c] + 9m3hdcaACP[c]              | 1   | (BT_0972 or BT_2380)                             | -1000 | 1000 | 3  | Cell Envelope Biosynthesis | PMID: 6102980, PMID: 7440508, PMID: 7204330 | Added manually to BIGG database based on reaction mechanism proposed by Model SEED. This reaction is involved in fatty acid biosynthesis. B. thetaiotaomicron is well known to synthesize iso- and anteiso-branched fatty acids. | 1.1.1.100 |
| rxn05343    | 3OAS100     | 3-oxoacyl-[acyl-carrier-protein] synthase (n-C10:0)                                        | h[c] + malACP[c] + ocACP[c] => ACP[c] + 3odecACP[c] + co2[c]             | 0   | ((BT_0122 and BT_3358) or (BT_3358 and BT_3834)) | 0     | 1000 | 3  | Cell Envelope Biosynthesis | PMID: 6102980, PMID: 7440508, PMID: 7204330 | The fatty acid composition of B. thetaiotaomicron was determined experimentally.                                                                                                                                                 | 2.3.1.41  |
| rxn05425    | 3OAS10M11   | 10-methyl-undecanoyl-ACPMalonyl-[acyl-carrier-protein] C-acyltransferase (decarboxylating) | h[c] + malACP[c] + 10mundecACP[c] => ACP[c] + 12m3otridecACP[c] + co2[c] | 0   | ((BT_0122 and BT_3358) or (BT_3358 and BT_3834)) | 0     | 1000 | 3  | Cell Envelope Biosynthesis | PMID: 6102980, PMID: 7440508, PMID: 7204330 | Added manually to BIGG database based on reaction mechanism proposed by Model SEED. This reaction is involved in fatty acid biosynthesis. B. thetaiotaomicron is well known to synthesize iso- and anteiso-branched fatty acids. | 2.3.1.41  |

| SEED Rxn ID | BIGG Rxn ID | Function                                                                                   | Formula                                                               | Rev | GA                                               | LB | UB   | CS | Subsystem                  | Reference                                   | Notes                                                                                                                                                                                                                            | EC Number |
|-------------|-------------|--------------------------------------------------------------------------------------------|-----------------------------------------------------------------------|-----|--------------------------------------------------|----|------|----|----------------------------|---------------------------------------------|----------------------------------------------------------------------------------------------------------------------------------------------------------------------------------------------------------------------------------|-----------|
| rxn05375    | 3OAS10M12   | 10-methyl-dodecanoyl-ACPmalonyl-[acyl-carrier-protein] C-acyltransferase (decarboxylating) | h[c] + malACP[c] + 10mddcaACP[c] => ACP[c] + 12m3omyrsACP[c] + co2[c] | 0   | ((BT_0122 and BT_3358) or (BT_3358 and BT_3834)) | 0  | 1000 | 3  | Cell Envelope Biosynthesis | PMID: 6102980, PMID: 7440508, PMID: 7204330 | Added manually to BIGG database based on reaction mechanism proposed by Model SEED. This reaction is involved in fatty acid biosynthesis. B. thetaiotaomicron is well known to synthesize iso- and anteiso-branched fatty acids. | 2.3.1.41  |
| rxn05400    | 3OAS11M12   | 11-methyl-dodecanoyl-ACPmalonyl-[acyl-carrier-protein] C-acyltransferase (decarboxylating) | h[c] + malACP[c] + 11mddcaACP[c] => ACP[c] + 13m3omyrsACP[c] + co2[c] | 0   | ((BT_0122 and BT_3358) or (BT_3358 and BT_3834)) | 0  | 1000 | 3  | Cell Envelope Biosynthesis | PMID: 6102980, PMID: 7440508, PMID: 7204330 | Added manually to BIGG database based on reaction mechanism proposed by Model SEED. This reaction is involved in fatty acid biosynthesis. B. thetaiotaomicron is well known to synthesize iso- and anteiso-branched fatty acids. | 2.3.1.41  |
| rxn05348    | 3OAS120     | 3-oxoacyl-[acyl-carrier-protein] synthase (n-C12:0)                                        | h[c] + malACP[c] + dcaACP[c] => ACP[c] + 3oddecACP[c] + co2[c]        | 0   | ((BT_0122 and BT_3358) or (BT_3358 and BT_3834)) | 0  | 1000 | 3  | Cell Envelope Biosynthesis | PMID: 6102980, PMID: 7440508, PMID: 7204330 | The fatty acid composition of B. thetaiotaomicron was determined experimentally.                                                                                                                                                 | 2.3.1.41  |
|             | 3OAS121     | 3-oxoacyl-[acyl-carrier-protein] synthase (n-C12:1)                                        | h[c] + malACP[c] + cdec3eACP[c] => ACP[c] + 3ocddec5eACP[c] + co2[c]  | 0   | ((BT_0122 and BT_3358) or (BT_3358 and BT_3834)) | 0  | 1000 | 3  | Cell Envelope Biosynthesis | PMID: 6102980, PMID: 7440508, PMID: 7204330 | The fatty acid composition of B. thetaiotaomicron was determined experimentally.                                                                                                                                                 | 2.3.1.41  |

| SEED Rxn ID | BIGG Rxn ID | Function                                                                                      | Formula                                                                    | Rev | GA                                               | LB | UB   | CS | Subsystem                  | Reference                                   | Notes                                                                                                                                                                                                                            | EC Number |
|-------------|-------------|-----------------------------------------------------------------------------------------------|----------------------------------------------------------------------------|-----|--------------------------------------------------|----|------|----|----------------------------|---------------------------------------------|----------------------------------------------------------------------------------------------------------------------------------------------------------------------------------------------------------------------------------|-----------|
| rxn05429    | 3OAS12M13   | 12-methyl-tridecanoyl-ACPmalonyl-[acyl-carrier-protein] C-acyltransferase (decarboxylating)   | h[c] + malACP[c] + 12mtridecACP[c] => ACP[c] + 14m3opentdecACP[c] + co2[c] | 0   | ((BT_0122 and BT_3358) or (BT_3358 and BT_3834)) | 0  | 1000 | 3  | Cell Envelope Biosynthesis | PMID: 6102980, PMID: 7440508, PMID: 7204330 | Added manually to BIGG database based on reaction mechanism proposed by Model SEED. This reaction is involved in fatty acid biosynthesis. B. thetaiotaomicron is well known to synthesize iso- and anteiso-branched fatty acids. | 2.3.1.41  |
| rxn05379    | 3OAS12M14   | 12-methyl-tetradecanoyl-ACPmalonyl-[acyl-carrier-protein] C-acyltransferase (decarboxylating) | h[c] + malACP[c] + 12mmyrsACP[c] => ACP[c] + 14m3opalmACP[c] + co2[c]      | 0   | ((BT_0122 and BT_3358) or (BT_3358 and BT_3834)) | 0  | 1000 | 3  | Cell Envelope Biosynthesis | PMID: 6102980, PMID: 7440508, PMID: 7204330 | Added manually to BIGG database based on reaction mechanism proposed by Model SEED. This reaction is involved in fatty acid biosynthesis. B. thetaiotaomicron is well known to synthesize iso- and anteiso-branched fatty acids. | 2.3.1.41  |
| rxn05404    | 3OAS13M14   | 13-methyl-tetradecanoyl-ACPmalonyl-[acyl-carrier-protein] C-acyltransferase (decarboxylating) | h[c] + malACP[c] + 13mmyrsACP[c] => ACP[c] + 15m3opalmACP[c] + co2[c]      | 0   | ((BT_0122 and BT_3358) or (BT_3358 and BT_3834)) | 0  | 1000 | 3  | Cell Envelope Biosynthesis | PMID: 6102980, PMID: 7440508, PMID: 7204330 | Added manually to BIGG database based on reaction mechanism proposed by Model SEED. This reaction is involved in fatty acid biosynthesis. B. thetaiotaomicron is well known to synthesize iso- and anteiso-branched fatty acids. | 2.3.1.41  |
| rxn05345    | 3OAS140     | 3-oxoacyl-[acyl-carrier-protein] synthase (n-C14:0)                                           | h[c] + malACP[c] + ddcaACP[c] => ACP[c] + 3omrsACP[c] + co2[c]             | 0   | ((BT_0122 and BT_3358) or (BT_3358 and BT_3834)) | 0  | 1000 | 3  | Cell Envelope Biosynthesis | PMID: 6102980, PMID: 7440508, PMID: 7204330 | The fatty acid composition of B. thetaiotaomicron was determined experimentally.                                                                                                                                                 | 2.3.1.41  |

| SEED Rxn ID | BIGG Rxn ID | Function                                                                                | Formula                                                              | Rev | GA                                               | LB | UB   | CS | Subsystem                  | Reference                                   | Notes                                                                                                                                                                                                                            | EC Number |
|-------------|-------------|-----------------------------------------------------------------------------------------|----------------------------------------------------------------------|-----|--------------------------------------------------|----|------|----|----------------------------|---------------------------------------------|----------------------------------------------------------------------------------------------------------------------------------------------------------------------------------------------------------------------------------|-----------|
|             | 3OAS141     | 3-oxoacyl-[acyl-carrier-protein] synthase (n-C14:1)                                     | h[c] + malACP[c] + cddec5eACP[c] => ACP[c] + 3ocmrs7eACP[c] + co2[c] | 0   | ((BT_0122 and BT_3358) or (BT_3358 and BT_3834)) | 0  | 1000 | 3  | Cell Envelope Biosynthesis | PMID: 6102980, PMID: 7440508, PMID: 7204330 | The fatty acid composition of B. thetaiotaomicron was determined experimentally.                                                                                                                                                 | 2.3.1.41  |
| rxn05344    | 3OAS160     | 3-oxoacyl-[acyl-carrier-protein] synthase (n-C16:0)                                     | h[c] + malACP[c] + myrsACP[c] => ACP[c] + 3opalmACP[c] + co2[c]      | 0   | ((BT_0122 and BT_3358) or (BT_3358 and BT_3834)) | 0  | 1000 | 3  | Cell Envelope Biosynthesis | PMID: 6102980, PMID: 7440508, PMID: 7204330 | The fatty acid composition of B. thetaiotaomicron was determined experimentally.                                                                                                                                                 | 2.3.1.41  |
|             | 3OAS161     | 3-oxoacyl-[acyl-carrier-protein] synthase (n-C16:1)                                     | h[c] + malACP[c] + tdeACP[c] => ACP[c] + 3ocpalm9eACP[c] + co2[c]    | 0   | ((BT_0122 and BT_3358) or (BT_3358 and BT_3834)) | 0  | 1000 | 3  | Cell Envelope Biosynthesis | PMID: 6102980, PMID: 7440508, PMID: 7204330 | The fatty acid composition of B. thetaiotaomicron was determined experimentally.                                                                                                                                                 | 2.3.1.41  |
| rxn05460    | 3OAS180     | 3-oxoacyl-[acyl-carrier-protein] synthase (n-C18:0)                                     | h[c] + malACP[c] + palmACP[c] => ACP[c] + 3ooctdACP[c] + co2[c]      | 0   | ((BT_0122 and BT_3358) or (BT_3358 and BT_3834)) | 0  | 1000 | 3  | Cell Envelope Biosynthesis | PMID: 6102980, PMID: 7440508, PMID: 7204330 | The fatty acid composition of B. thetaiotaomicron was determined experimentally.                                                                                                                                                 | 2.3.1.41  |
|             | 3OAS181     | 3-oxoacyl-[acyl-carrier-protein] synthase (n-C18:1)                                     | h[c] + malACP[c] + hdeACP[c] => ACP[c] + 3ocvac11eACP[c] + co2[c]    | 0   | ((BT_0122 and BT_3358) or (BT_3358 and BT_3834)) | 0  | 1000 | 3  | Cell Envelope Biosynthesis | PMID: 6102980, PMID: 7440508, PMID: 7204330 | The fatty acid composition of B. thetaiotaomicron was determined experimentally.                                                                                                                                                 | 2.3.1.41  |
| rxn05409    | 3OAS2M3     | 2-methylpropionyl-ACPMalonyl-[acyl-carrier-protein] C-acyltransferase (decarboxylating) | h[c] + malACP[c] + 2mpropACP[c] => ACP[c] + 4m3opentACP[c] + co2[c]  | 0   | ((BT_0122 and BT_3358) or (BT_3358 and BT_3834)) | 0  | 1000 | 3  | Cell Envelope Biosynthesis | PMID: 6102980, PMID: 7440508, PMID: 7204330 | Added manually to BIGG database based on reaction mechanism proposed by Model SEED. This reaction is involved in fatty acid biosynthesis. B. thetaiotaomicron is well known to synthesize iso- and anteiso-branched fatty acids. | 2.3.1.41  |

| SEED Rxn ID | BIGG Rxn ID | Function                                                                                      | Formula                                                             | Rev | GA                                               | LB | UB   | CS | Subsystem                  | Reference                                   | Notes                                                                                                                                                                                                                            | EC Number |
|-------------|-------------|-----------------------------------------------------------------------------------------------|---------------------------------------------------------------------|-----|--------------------------------------------------|----|------|----|----------------------------|---------------------------------------------|----------------------------------------------------------------------------------------------------------------------------------------------------------------------------------------------------------------------------------|-----------|
| rxn05384    | 3OAS3M4     | 3-methylbutanoyl-ACPmalonyl-[acyl-carrier-protein] C-acyltransferase (decarboxylating)        | h[c] + malACP[c] + 3mbutACP[c] => ACP[c] + 5m3ohexACP[c] + co2[c]   | 0   | ((BT_0122 and BT_3358) or (BT_3358 and BT_3834)) | 0  | 1000 | 3  | Cell Envelope Biosynthesis | PMID: 6102980, PMID: 7440508, PMID: 7204330 | Added manually to BIGG database based on reaction mechanism proposed by Model SEED. This reaction is involved in fatty acid biosynthesis. B. thetaiotaomicron is well known to synthesize iso- and anteiso-branched fatty acids. | 2.3.1.41  |
| rxn05359    | 3OAS4M3O6   | 4-methyl-3-oxo-hexanoyl-ACPmalonyl-[acyl-carrier-protein] C-acyltransferase (decarboxylating) | h[c] + 2mbutACP[c] + malACP[c] => ACP[c] + 4m3ohexACP[c] + co2[c]   | 0   | ((BT_0122 and BT_3358) or (BT_3358 and BT_3834)) | 0  | 1000 | 3  | Cell Envelope Biosynthesis | PMID: 6102980, PMID: 7440508, PMID: 7204330 | Added manually to BIGG database based on reaction mechanism proposed by Model SEED. This reaction is involved in fatty acid biosynthesis. B. thetaiotaomicron is well known to synthesize iso- and anteiso-branched fatty acids. | 2.3.1.41  |
| rxn05413    | 3OAS4M5     | 4-methyl-pentanoyl-ACPmalonyl-[acyl-carrier-protein] C-acyltransferase (decarboxylating)      | h[c] + malACP[c] + 4mpentACP[c] => ACP[c] + 6m3oheptACP[c] + co2[c] | 0   | ((BT_0122 and BT_3358) or (BT_3358 and BT_3834)) | 0  | 1000 | 3  | Cell Envelope Biosynthesis | PMID: 6102980, PMID: 7440508, PMID: 7204330 | Added manually to BIGG database based on reaction mechanism proposed by Model SEED. This reaction is involved in fatty acid biosynthesis. B. thetaiotaomicron is well known to synthesize iso- and anteiso-branched fatty acids. | 2.3.1.41  |

| SEED Rxn ID | BIGG Rxn ID | Function                                                                                 | Formula                                                            | Rev | GA                                               | LB | UB   | CS | Subsystem                  | Reference                                   | Notes                                                                                                                                                                                                                            | EC Number |
|-------------|-------------|------------------------------------------------------------------------------------------|--------------------------------------------------------------------|-----|--------------------------------------------------|----|------|----|----------------------------|---------------------------------------------|----------------------------------------------------------------------------------------------------------------------------------------------------------------------------------------------------------------------------------|-----------|
| rxn05363    | 3OAS4M6     | 4-methyl-hexanoyl-ACPmalonyl-[acyl-carrier-protein] C-acyltransferase (decarboxylating)  | h[c] + malACP[c] + 4mhhexACP[c] => ACP[c] + 6m3oocACP[c] + co2[c]  | 0   | ((BT_0122 and BT_3358) or (BT_3358 and BT_3834)) | 0  | 1000 | 3  | Cell Envelope Biosynthesis | PMID: 6102980, PMID: 7440508, PMID: 7204330 | Added manually to BIGG database based on reaction mechanism proposed by Model SEED. This reaction is involved in fatty acid biosynthesis. B. thetaiotaomicron is well known to synthesize iso- and anteiso-branched fatty acids. | 2.3.1.41  |
| rxn05388    | 3OAS5M6     | 5-methyl-hexanoyl-ACPmalonyl-[acyl-carrier-protein] C-acyltransferase (decarboxylating)  | h[c] + malACP[c] + 5mhhexACP[c] => ACP[c] + 7m3oocACP[c] + co2[c]  | 0   | ((BT_0122 and BT_3358) or (BT_3358 and BT_3834)) | 0  | 1000 | 3  | Cell Envelope Biosynthesis | PMID: 6102980, PMID: 7440508, PMID: 7204330 | Added manually to BIGG database based on reaction mechanism proposed by Model SEED. This reaction is involved in fatty acid biosynthesis. B. thetaiotaomicron is well known to synthesize iso- and anteiso-branched fatty acids. | 2.3.1.41  |
| rxn05346    | 3OAS60      | 3-oxoacyl-[acyl-carrier-protein] synthase (n-C6:0)                                       | h[c] + malACP[c] + butACP[c] => ACP[c] + 3ohexACP[c] + co2[c]      | 0   | ((BT_0122 and BT_3358) or (BT_3358 and BT_3834)) | 0  | 1000 | 3  | Cell Envelope Biosynthesis | PMID: 6102980, PMID: 7440508, PMID: 7204330 | The fatty acid composition of B. thetaiotaomicron was determined experimentally.                                                                                                                                                 | 2.3.1.41  |
| rxn05417    | 3OAS6M7     | 6-methyl-heptanoyl-ACPmalonyl-[acyl-carrier-protein] C-acyltransferase (decarboxylating) | h[c] + malACP[c] + 6mheptACP[c] => ACP[c] + 8m3ononACP[c] + co2[c] | 0   | ((BT_0122 and BT_3358) or (BT_3358 and BT_3834)) | 0  | 1000 | 3  | Cell Envelope Biosynthesis | PMID: 6102980, PMID: 7440508, PMID: 7204330 | Added manually to BIGG database based on reaction mechanism proposed by Model SEED. This reaction is involved in fatty acid biosynthesis. B. thetaiotaomicron is well known to synthesize iso- and anteiso-branched fatty acids. | 2.3.1.41  |

| SEED Rxn ID | BIGG Rxn ID | Function                                                                                | Formula                                                             | Rev | GA                                               | LB | UB   | CS | Subsystem                  | Reference                                   | Notes                                                                                                                                                                                                                            | EC Number |
|-------------|-------------|-----------------------------------------------------------------------------------------|---------------------------------------------------------------------|-----|--------------------------------------------------|----|------|----|----------------------------|---------------------------------------------|----------------------------------------------------------------------------------------------------------------------------------------------------------------------------------------------------------------------------------|-----------|
| rxn05367    | 3OAS6M8     | 6-methyl-octanoyl-ACPmalonyl-[acyl-carrier-protein] C-acyltransferase (decarboxylating) | h[c] + malACP[c] + 6mocACP[c] => ACP[c] + 8m3odcaACP[c] + co2[c]    | 0   | ((BT_0122 and BT_3358) or (BT_3358 and BT_3834)) | 0  | 1000 | 3  | Cell Envelope Biosynthesis | PMID: 6102980, PMID: 7440508, PMID: 7204330 | Added manually to BIGG database based on reaction mechanism proposed by Model SEED. This reaction is involved in fatty acid biosynthesis. B. thetaiotaomicron is well known to synthesize iso- and anteiso-branched fatty acids. | 2.3.1.41  |
| rxn05392    | 3OAS7M8     | 7-methyl-octanoyl-ACPmalonyl-[acyl-carrier-protein] C-acyltransferase (decarboxylating) | h[c] + malACP[c] + 7mocACP[c] => ACP[c] + 9m3odcaACP[c] + co2[c]    | 0   | ((BT_0122 and BT_3358) or (BT_3358 and BT_3834)) | 0  | 1000 | 3  | Cell Envelope Biosynthesis | PMID: 6102980, PMID: 7440508, PMID: 7204330 | Added manually to BIGG database based on reaction mechanism proposed by Model SEED. This reaction is involved in fatty acid biosynthesis. B. thetaiotaomicron is well known to synthesize iso- and anteiso-branched fatty acids. | 2.3.1.41  |
| rxn05350    | 3OAS80      | 3-oxoacyl-[acyl-carrier-protein] synthase (n-C8:0)                                      | h[c] + malACP[c] + hexACP[c] => ACP[c] + 3ooctACP[c] + co2[c]       | 0   | ((BT_0122 and BT_3358) or (BT_3358 and BT_3834)) | 0  | 1000 | 3  | Cell Envelope Biosynthesis | PMID: 6102980, PMID: 7440508, PMID: 7204330 | The fatty acid composition of B. thetaiotaomicron was determined experimentally.                                                                                                                                                 | 2.3.1.41  |
| rxn05371    | 3OAS8M10    | 8-methyl-decanoyl-ACPmalonyl-[acyl-carrier-protein] C-acyltransferase (decarboxylating) | h[c] + malACP[c] + 8mdcaACP[c] => ACP[c] + 10m3oddcaACP[c] + co2[c] | 0   | ((BT_0122 and BT_3358) or (BT_3358 and BT_3834)) | 0  | 1000 | 3  | Cell Envelope Biosynthesis | PMID: 6102980, PMID: 7440508, PMID: 7204330 | Added manually to BIGG database based on reaction mechanism proposed by Model SEED. This reaction is involved in fatty acid biosynthesis. B. thetaiotaomicron is well known to synthesize iso- and anteiso-branched fatty acids. | 2.3.1.41  |

| SEED Rxn ID | BIGG Rxn ID | Function                                                                                | Formula                                                              | Rev | GA                                               | LB | UB   | CS | Subsystem                  | Reference                                   | Notes                                                                                                                                                                                                                            | EC Number |
|-------------|-------------|-----------------------------------------------------------------------------------------|----------------------------------------------------------------------|-----|--------------------------------------------------|----|------|----|----------------------------|---------------------------------------------|----------------------------------------------------------------------------------------------------------------------------------------------------------------------------------------------------------------------------------|-----------|
| rxn05421    | 3OAS8M9     | 8-methyl-nonanoyl-ACPmalonyl-[acyl-carrier-protein] C-acyltransferase (decarboxylating) | h[c] + malACP[c] + 8mnonACP[c] => ACP[c] + 10m3oundecACP[c] + co2[c] | 0   | ((BT_0122 and BT_3358) or (BT_3358 and BT_3834)) | 0  | 1000 | 3  | Cell Envelope Biosynthesis | PMID: 6102980, PMID: 7440508, PMID: 7204330 | Added manually to BIGG database based on reaction mechanism proposed by Model SEED. This reaction is involved in fatty acid biosynthesis. B. thetaiotaomicron is well known to synthesize iso- and anteiso-branched fatty acids. | 2.3.1.41  |
| rxn05396    | 3OAS9M10    | 9-methyl-decanoyl-ACPmalonyl-[acyl-carrier-protein] C-acyltransferase (decarboxylating) | h[c] + malACP[c] + 9mdcaACP[c] => ACP[c] + 11m3oddcaACP[c] + co2[c]  | 0   | ((BT_0122 and BT_3358) or (BT_3358 and BT_3834)) | 0  | 1000 | 3  | Cell Envelope Biosynthesis | PMID: 6102980, PMID: 7440508, PMID: 7204330 | Added manually to BIGG database based on reaction mechanism proposed by Model SEED. This reaction is involved in fatty acid biosynthesis. B. thetaiotaomicron is well known to synthesize iso- and anteiso-branched fatty acids. | 2.3.1.41  |

| SEED Rxn ID | BIGG Rxn ID | Function                        | Formula                                   | Rev | GA      | LB | UB   | CS | Subsystem                                  | Reference     | Notes                                                                                                                                                                                                                                                                                                                                                                                                                                                                                                                                                                              | EC Number |
|-------------|-------------|---------------------------------|-------------------------------------------|-----|---------|----|------|----|--------------------------------------------|---------------|------------------------------------------------------------------------------------------------------------------------------------------------------------------------------------------------------------------------------------------------------------------------------------------------------------------------------------------------------------------------------------------------------------------------------------------------------------------------------------------------------------------------------------------------------------------------------------|-----------|
|             | 3POPDC      | phosphonopyruvate decarboxylase | h[c] + 3pop[c]<br>=> pald[c] + co2[c]     | 0   | BT_1719 | 0  | 1000 | 3  | Capsular Polysaccharide Biosynthesis       | PMID:12904299 | The enzyme catalyses a step in the biosynthetic pathway of 2-aminoethylphosphonate, a component of the capsular polysaccharide complex of Bacteroides fragilis and most likely other Bacteroides species. Requires thiamine diphosphate and Mg2+ as cofactors. The enzyme is activated by the divalent cations Mg2+, Ca2+ and Mn2+. Pyruvate and sulfopyruvate can also act as substrates, but more slowly. This enzyme drives the reaction catalysed by EC 5.4.2.9, phosphoenolpyruvate mutase, in the thermodynamically unfavourable direction of 3-phosphonopyruvate formation. | 4.1.1.82  |
| rxn03446    | 4HTHRS      | 4-Hydroxy-L-threonine synthase  | h2o[c] + phthr[c]<br>=> 4hthr[c] + pi[c]  | 0   | BT_2401 | 0  | 1000 | 2  | Cofactor and Prosthetic Group Biosynthesis |               |                                                                                                                                                                                                                                                                                                                                                                                                                                                                                                                                                                                    | 4.2.3.1   |
|             | 5DOAN       | 5'-deoxyadenosine nucleosidase  | h2o[c] + dad-5[c]<br>=> 5drib[c] + ade[c] | 0   | BT_4451 | 0  | 1000 | 2  | Cofactor and Prosthetic Group Biosynthesis | PMID:21166890 | This reaction is catalyzed by Methylthioadenosine/S-adenosylhomocysteine nucleosidase.                                                                                                                                                                                                                                                                                                                                                                                                                                                                                             |           |

| SEED Rxn ID | BIGG Rxn ID | Function                                                                            | Formula                                                          | Rev | GA                                                                                                           | LB    | UB   | CS | Subsystem                      | Reference                                   | Notes                                                                                                                                                                                                                          | EC Number |
|-------------|-------------|-------------------------------------------------------------------------------------|------------------------------------------------------------------|-----|--------------------------------------------------------------------------------------------------------------|-------|------|----|--------------------------------|---------------------------------------------|--------------------------------------------------------------------------------------------------------------------------------------------------------------------------------------------------------------------------------|-----------|
|             | 7AHSDH      | 7-alpha-hydroxysteroid dehydrogenase                                                | cholate[c] + nad[c] <=> h[c] + 7ocholate[c] + nadh[c]            | 1   | BT_1911                                                                                                      | -1000 | 1000 | 4  | Bile Acid Metabolism           | PMID:189820                                 | Partly purified and characterized (PMID:189820) and annotated in B. thetaiotaomicron genome                                                                                                                                    | 1.1.1.159 |
|             | 7OCHOLATEt2 | 3alpha,12alpha-Dihydroxy-7-oxo-5beta-cholanate transport out via sodium cotransport | 7ocholate[c] + 2 na1[c] => 7ocholate[e] + 2 na1[e]               | 0   |                                                                                                              | 0     | 1000 | 2  | Transport, Extracellular       | PMID:16299351                               | B. thetaiotaomicron cannot completely epimerize bile acids. Further biotransformation of bile acid is performed by other gut bacteria (reviewed in PMID:16299351). Therefore, secretion of metabolized bile acid assumed.      |           |
|             | A_MANASEe   | alpha-mannosidase, extracellular                                                    | 2 h2o[e] + m2mn[e] => 2 man[e] + mn[e]                           | 0   | (BT_3774 or BT_3990 or BT_2199 or BT_2105 or BT_4072 or BT_4092 or BT_3784 or BT_3527 or BT_3530 or BT_3962) | 0     | 1000 | 3  | N-Glycan Degradation           | PMID: 20081828                              | B. thetaiotaomicron is known to degrade host N-glycans. The cleaved bound in this case is alpha-1,2. the mannosidases of the GH92 family included in the GPR were shown to be active against alpha-1,2 bounds in alpha-mannan. | 3.2.1.24  |
| rxn01117    | A5PISO      | arabinose-5-phosphate isomerase                                                     | ru5p-D[c] <=> ara5p[c]                                           | 1   | BT_3306                                                                                                      | -1000 | 1000 | 2  | Alternate Carbon Metabolism    |                                             |                                                                                                                                                                                                                                | 5.3.1.13  |
| rxn00533    | ACCOAC      | acetyl-CoA carboxylase                                                              | accoa[c] + atp[c] + hco3[c] => h[c] + pi[c] + adp[c] + malcoa[c] | 0   | ((BT_1915 and BT_1916 and BT_2238) or (BT_1448 and BT_1449 and BT_2238))                                     | 0     | 1000 | 3  | Glycerophospholipid Metabolism | PMID: 6102980, PMID: 7440508, PMID: 7204330 |                                                                                                                                                                                                                                | 6.4.1.2   |
|             | ACETOLt     | Acetol facilitated transport                                                        | acetol[e] <=> acetol[c]                                          | 1   |                                                                                                              | -1000 | 1000 | 2  | Transport, Extracellular       | PMID:11260473                               | B. thetaiotaomicron produces acetol.                                                                                                                                                                                           |           |

| SEED Rxn ID | BIGG Rxn ID | Function                                                                                   | Formula                                         | Rev | GA                              | LB    | UB   | CS | Subsystem                       | Reference     | Notes                                                                                                                                       | EC Number |
|-------------|-------------|--------------------------------------------------------------------------------------------|-------------------------------------------------|-----|---------------------------------|-------|------|----|---------------------------------|---------------|---------------------------------------------------------------------------------------------------------------------------------------------|-----------|
|             | ACGALK3     | N-acetylgalactosamine kinase (6-phosphate)                                                 | atp[c] + acgal[c] => h[c] + adp[c] + acgal6p[c] | 0   |                                 | 0     | 1000 | 2  | Aminosugar Metabolism           | PMID:2845859  | B. thetaiotaomicron grows on N-acetylgalactosamine: PMID:2845859. However, the utilization pathway is poorly understood.                    |           |
|             | ACGALr      | N-acetylgalactosamine reversible transport via proton symport                              | 2 h[e] + acgal[e] <=> 2 h[c] + acgal[c]         | 1   |                                 | -1000 | 1000 | 2  | Transport, Extracellular        | PMID:2845859  | B. thetaiotaomicron grows on N-acetylgalactosamine: PMID:2845859. However, the utilization pathway is poorly understood.                    |           |
| rxn00897    | ACGAM2E     | N-Acyl-D-glucosamine 2-epimerase                                                           | acgam[c] <=> acmana[c]                          | 1   | (BT_0437 or BT_0453 or BT_3605) | -1000 | 1000 | 2  | Aminosugar Metabolism           |               |                                                                                                                                             | 5.1.3.8   |
| rxn00892    | ACGAMK      | N-acetylglucosamine kinase                                                                 | atp[c] + acgam[c] => h[c] + adp[c] + acgam6p[c] | 0   | (BT_2493 or BT_4654)            | 0     | 1000 | 3  | Aminosugar Metabolism           | PMID:15659667 |                                                                                                                                             | 2.7.1.59  |
| rxn01505    | ACGAMPM     | phosphoacetylglucosamine mutase                                                            | acgam6p[c] <=> acgam1p[c]                       | 1   |                                 | -1000 | 1000 | 1  | Aminosugar Metabolism           | PMID:7240086  | Manually filled in based on KEGG Pathway to to make N-acetylglucosamine, a substrate known to support growth, usable.                       | 5.4.2.3   |
| rxn08040    | ACGAMT      | UDP-N-acetylglucosamine:undecaprenylphosphate N-acetylglucosamine -1-phosphate transferase | uacgam[c] + udcpp[c] => ump[c] + unaga[c]       | 0   | (BT_1339 or BT_2888)            | 0     | 1000 | 2  | Cell Envelope Biosynthesis      |               | Reversible in SEED                                                                                                                          |           |
|             | ACGAMtr     | Na-acetylglucosamine transport in via proton symport, reversible                           | 2 h[e] + acgam[e] <=> 2 h[c] + acgam[c]         | 1   | (BT_3180 or BT_3619)            | -1000 | 1000 | 4  | Transport, Extracellular        | PMID:7240086  | B. thetaiotaomicron grows on N-acetylglucosamine as sole carbon source. Gene annotation taken from The SEED Viewer (last checked 01.07.11). |           |
| rxn01917    | ACGK        | acetylglutamate kinase                                                                     | atp[c] + acglu[c] => adp[c] + acg5p[c]          | 0   | BT_3395                         | 0     | 1000 | 2  | Arginine and Proline Metabolism |               | Putative annotation (NCBI). Reversible in SEED.                                                                                             | 2.7.2.8   |

| SEED Rxn ID | BIGG Rxn ID | Function                                                                    | Formula                                                  | Rev | GA                       | LB    | UB   | CS | Subsystem                                           | Reference      | Notes                                                                                                                                                         | EC Number |
|-------------|-------------|-----------------------------------------------------------------------------|----------------------------------------------------------|-----|--------------------------|-------|------|----|-----------------------------------------------------|----------------|---------------------------------------------------------------------------------------------------------------------------------------------------------------|-----------|
| rxn00192    | ACGS        | N-acetylglutamate synthase                                                  | glu-L[c] +<br>accoa[c] => h[c]<br>+ coa[c] +<br>acglu[c] | 0   |                          | 0     | 1000 | 1  | Arginine and<br>Proline<br>Metabolism               |                | No GPR association available, but all reaction following up from this reaction to acetylornithine deacetylase are present, so a complete pathway was assumed. | 2.3.1.1   |
| rxn03194    | ACHBS       | 2-aceto-2-hydroxybutanoate synthase                                         | h[c] + pyr[c] +<br>2obut[c] =><br>co2[c] +<br>2ahbut[c]  | 0   | (BT_2076 and<br>BT_2077) | 0     | 1000 | 2  | Valine,<br>Leucine, and<br>Isoleucine<br>Metabolism |                | ACHBS and ACLS replace SEED reactions rxn00011, rxn02185 and rxn03194                                                                                         | 2.2.1.6   |
| rxn00225    | ACKr        | acetate kinase                                                              | atp[c] + ac[c]<br><=> adp[c] +<br>actp[c]                | 1   | BT_3693                  | -1000 | 1000 | 3  | Central<br>Metabolism                               | PMID: 16349240 | Present in related organism Bacteroides xylanolyticus.                                                                                                        | 2.7.2.1   |
|             | ACLS        | acetolactate synthase                                                       | h[c] + 2 pyr[c]<br>=> co2[c] + alac-<br>S[c]             | 0   | (BT_2076 and<br>BT_2077) | 0     | 1000 | 2  | Valine,<br>Leucine, and<br>Isoleucine<br>Metabolism |                | ACHBS and ACLS replace SEED reactions rxn00011, rxn02185 and rxn03194                                                                                         | 4.1.3.18  |
|             | ACNAM9PL2   | 2-keto-3-deoxy-d-glycero-d-galacto-9-phosphonononic acid (KDN-9-P) synthase | h2o[c] +<br>man6p[c] +<br>pep[c] => pi[c]<br>+ kdnpc[c]  | 0   | BT_1714                  | 0     | 1000 | 4  | Capsular<br>Polysaccharide<br>Biosynthesis          | PMID: 18804026 | B. thetaiotaomicron forms and cytidylates 2-keto-3-deoxy-D-glycero-D-galactononic acid (KDN), most likely for inclusion in its capsular polysaccharides.      | 2.5.1.56  |
| rxn05487    | ACNAMt2r    | N-acetylneuraminate proton symport, reversible                              | h[e] + acnam[e]<br>=> h[c] +<br>acnam[c]                 | 0   |                          | 0     | 1000 | 1  | Transport,<br>Extracellular                         |                |                                                                                                                                                               |           |

| SEED Rxn ID | BIGG Rxn ID  | Function                                               | Formula                                      | Rev | GA                   | LB | UB   | CS | Subsystem                      | Reference                                   | Notes                                                                                                                                                                                                                            | EC Number |
|-------------|--------------|--------------------------------------------------------|----------------------------------------------|-----|----------------------|----|------|----|--------------------------------|---------------------------------------------|----------------------------------------------------------------------------------------------------------------------------------------------------------------------------------------------------------------------------------|-----------|
| rxn10212    | ACOAAGPAT140 | myristoyl-1-acylglycerol-3-phosphate O-acyltransferase | 1tdecg3p[c] + tdcoa[c] => coa[c] + pa140[c]  | 0   | (BT_0243 or BT_4462) | 0  | 1000 | 3  | Glycerophospholipid Metabolism | PMID: 6102980, PMID: 7440508, PMID: 7204330 | Added manually to BIGG database based on reaction mechanism proposed by Model SEED. This reaction is involved in fatty acid biosynthesis. B. thetaiotaomicron is well known to synthesize iso- and anteiso-branched fatty acids. | 2.3.1.51  |
| rxn10211    | ACOAAGPAT160 | palmitoyl-1-acylglycerol-3-phosphate O-acyltransferase | pmtcoa[c] + 1hdecg3p[c] => coa[c] + pa160[c] | 0   | (BT_0243 or BT_4462) | 0  | 1000 | 3  | Glycerophospholipid Metabolism | PMID: 6102980, PMID: 7440508, PMID: 7204330 | Added manually to BIGG database based on reaction mechanism proposed by Model SEED. This reaction is involved in fatty acid biosynthesis. B. thetaiotaomicron is well known to synthesize iso- and anteiso-branched fatty acids. | 2.3.1.51  |
| rxn10213    | ACOAAGPAT180 | stearoyl-1-acylglycerol-3-phosphate O-acyltransferase  | stcoa[c] + 1odecg3p[c] => coa[c] + pa180[c]  | 0   | (BT_0243 or BT_4462) | 0  | 1000 | 3  | Glycerophospholipid Metabolism | PMID: 6102980, PMID: 7440508, PMID: 7204330 | Added manually to BIGG database based on reaction mechanism proposed by Model SEED. This reaction is involved in fatty acid biosynthesis. B. thetaiotaomicron is well known to synthesize iso- and anteiso-branched fatty acids. | 2.3.1.51  |

| SEED Rxn ID | BIGG Rxn ID       | Function                                                                      | Formula                                                          | Rev | GA                      | LB | UB   | CS | Subsystem                             | Reference                                         | Notes                                                                                                                                                                                                                                                               | EC Number |
|-------------|-------------------|-------------------------------------------------------------------------------|------------------------------------------------------------------|-----|-------------------------|----|------|----|---------------------------------------|---------------------------------------------------|---------------------------------------------------------------------------------------------------------------------------------------------------------------------------------------------------------------------------------------------------------------------|-----------|
| rxn10218    | ACOAAGPATAII<br>5 | anteisopentadecanoyl-<br>1-acylglycerol-3-<br>phosphate O-<br>acyltransferase | 1aipdecg3p[c] +<br>aipdcoa[c] =><br>h[c] + coa[c] +<br>paai15[c] | 0   | (BT_0243 or<br>BT_4462) | 0  | 1000 | 3  | Glycerophosph<br>olipid<br>Metabolism | PMID: 6102980,<br>PMID: 7440508,<br>PMID: 7204330 | Added manually to<br>BIGG database based<br>on reaction<br>mechanism proposed<br>by Model SEED.<br>This reaction is<br>involved in fatty acid<br>biosynthesis. B.<br>thetaitaomicron is<br>well known to<br>synthesize iso- and<br>anteiso-branched<br>fatty acids. | 2.3.1.51  |
| rxn10214    | ACOAAGPATAII<br>7 | anteisoheptadecanoyl-<br>1-acylglycerol-3-<br>phosphate O-<br>acyltransferase | aihpdcoa[c] +<br>1aihpddecg3p[c]<br>=> coa[c] +<br>paai17[c]     | 0   | (BT_0243 or<br>BT_4462) | 0  | 1000 | 3  | Glycerophosph<br>olipid<br>Metabolism | PMID: 6102980,<br>PMID: 7440508,<br>PMID: 7204330 | Added manually to<br>BIGG database based<br>on reaction<br>mechanism proposed<br>by Model SEED.<br>This reaction is<br>involved in fatty acid<br>biosynthesis. B.<br>thetaitaomicron is<br>well known to<br>synthesize iso- and<br>anteiso-branched<br>fatty acids. | 2.3.1.51  |
| rxn10216    | ACOAAGPATII4      | isotetradecanoyl-1-<br>acylglycerol-3-<br>phosphate O-<br>acyltransferase     | itdcoa[c] +<br>litdecg3p[c] =><br>h[c] + coa[c] +<br>pai14[c]    | 0   | (BT_0243 or<br>BT_4462) | 0  | 1000 | 3  | Glycerophosph<br>olipid<br>Metabolism | PMID: 6102980,<br>PMID: 7440508,<br>PMID: 7204330 | Added manually to<br>BIGG database based<br>on reaction<br>mechanism proposed<br>by Model SEED.<br>This reaction is<br>involved in fatty acid<br>biosynthesis. B.<br>thetaitaomicron is<br>well known to<br>synthesize iso- and<br>anteiso-branched<br>fatty acids. | 2.3.1.51  |

| SEED Rxn ID | BIGG Rxn ID  | Function                                                      | Formula                                                       | Rev | GA                                               | LB    | UB   | CS | Subsystem                      | Reference                                         | Notes                                                                                                                                                                                                                            | EC Number |
|-------------|--------------|---------------------------------------------------------------|---------------------------------------------------------------|-----|--------------------------------------------------|-------|------|----|--------------------------------|---------------------------------------------------|----------------------------------------------------------------------------------------------------------------------------------------------------------------------------------------------------------------------------------|-----------|
| rxn10217    | ACOAAGPATI15 | isopentadecanoyl-1-acylglycerol-3-phosphate O-acyltransferase | ipdcoa[c] +<br>lipdecg3p[c] =><br>h[c] + coa[c] +<br>pai15[c] | 0   | (BT_0243 or<br>BT_4462)                          | 0     | 1000 | 3  | Glycerophospholipid Metabolism | PMID: 6102980,<br>PMID: 7440508,<br>PMID: 7204330 | Added manually to BIGG database based on reaction mechanism proposed by Model SEED. This reaction is involved in fatty acid biosynthesis. B. thetaiotaomicron is well known to synthesize iso- and anteiso-branched fatty acids. | 2.3.1.51  |
| rxn10219    | ACOAAGPATI16 | isohexadecanoyl-1-acylglycerol-3-phosphate O-acyltransferase  | ihdcoa[c] +<br>lihdecg3p[c] =><br>h[c] + coa[c] +<br>pai16[c] | 0   | (BT_0243 or<br>BT_4462)                          | 0     | 1000 | 3  | Glycerophospholipid Metabolism | PMID: 6102980,<br>PMID: 7440508,<br>PMID: 7204330 | Added manually to BIGG database based on reaction mechanism proposed by Model SEED. This reaction is involved in fatty acid biosynthesis. B. thetaiotaomicron is well known to synthesize iso- and anteiso-branched fatty acids. | 2.3.1.51  |
| rxn10215    | ACOAAGPATI17 | isoheptadecanoyl-1-acylglycerol-3-phosphate O-acyltransferase | ihpdcoa[c] +<br>lihpdceg3p[c] =><br>coa[c] +<br>pai17[c]      | 0   | (BT_0243 or<br>BT_4462)                          | 0     | 1000 | 3  | Glycerophospholipid Metabolism | PMID: 6102980,<br>PMID: 7440508,<br>PMID: 7204330 | Added manually to BIGG database based on reaction mechanism proposed by Model SEED. This reaction is involved in fatty acid biosynthesis. B. thetaiotaomicron is well known to synthesize iso- and anteiso-branched fatty acids. | 2.3.1.51  |
| rxn05349    | ACOATA       | Acetyl-CoA ACP transacylase                                   | ACP[c] +<br>accoa[c] <=><br>coa[c] +<br>acACP[c]              | 1   | ((BT_0122 and BT_3358) or (BT_3358 and BT_3834)) | -1000 | 1000 | 3  | Glycerophospholipid Metabolism | PMID: 6102980,<br>PMID: 7440508,<br>PMID: 7204330 |                                                                                                                                                                                                                                  | 2.3.1.38  |

| SEED Rxn ID | BIGG Rxn ID | Function                                            | Formula                                                              | Rev | GA                                | LB    | UB   | CS | Subsystem                                  | Reference                    | Notes                                                                                                                                        | EC Number |
|-------------|-------------|-----------------------------------------------------|----------------------------------------------------------------------|-----|-----------------------------------|-------|------|----|--------------------------------------------|------------------------------|----------------------------------------------------------------------------------------------------------------------------------------------|-----------|
| rxn00469    | ACODA       | acetylornithine deacetylase                         | h2o[c] + acorn[c] => ac[c] + orn[c]                                  | 0   | BT_3549                           | 0     | 1000 | 2  | Arginine and Proline Metabolism            |                              | Reversible in SEED                                                                                                                           | 3.5.1.16  |
| rxn00974    | ACONTa      | aconitase (half-reaction A, Citrate hydro-lyase)    | cit[c] <=> h2o[c] + acon-C[c]                                        | 1   | BT_2072                           | -1000 | 1000 | 4  | TCA Cycle                                  | PMID:11260473, PMID:11880608 | This enzyme was demonstrated in B. thetaiotaomicron. The Bacteroides aconitase is mitochondrial-like.                                        | 4.2.1.3   |
| rxn01388    | ACONTb      | aconitase (half-reaction B, Isocitrate hydro-lyase) | h2o[c] + acon-C[c] <=> icit[c]                                       | 1   | BT_2072                           | -1000 | 1000 | 4  | TCA Cycle                                  | PMID:11260473, PMID:11880608 | This enzyme was demonstrated in B. thetaiotaomicron. The Bacteroides aconitase is mitochondrial-like.                                        | 4.2.1.3   |
| rxn01637    | ACOTA       | acetylornithine transaminase                        | akg[c] + acorn[c] <=> glu-L[c] + acg5sa[c]                           | 1   | BT_3758                           | -1000 | 1000 | 2  | Arginine and Proline Metabolism            |                              |                                                                                                                                              | 2.6.1.11  |
| rxn06023    | ACPS1       | acyl-carrier protein synthase                       | coa[c] + apoACP[c] => h[c] + ACP[c] + pap[c]                         | 0   |                                   | 0     | 1000 | 1  | Cofactor and Prosthetic Group Biosynthesis |                              | Reaction is reversible in SEED. Added by Model SEED during auto-completion step in pipeline. The reaction is essential for lipid metabolism. | 2.7.8.7   |
| rxn00175    | ACS         | acetyl-CoA synthetase                               | coa[c] + atp[c] + ac[c] => accoa[c] + amp[c] + ppi[c]                | 0   | BT_2924                           | 0     | 1000 | 2  | Glycolysis/Gluconeogenesis                 |                              | Annotation from NCBI Gene, last updated 21.05.11                                                                                             | 6.2.1.1   |
|             | ACS2        | acetyl-CoA synthase (propionate)                    | coa[c] + atp[c] + ppa[c] => amp[c] + ppi[c] + ppcoa[c]               | 0   | BT_2924                           | 0     | 1000 | 2  | Glycolysis/Gluconeogenesis                 |                              | Annotation from NCBI Gene, last updated 21.05.11                                                                                             | 6.2.1.1   |
| rxn09953    | ACTNDH      | acetoin dehydrogenase complex                       | coa[c] + nad[c] + actn-R[c] <=> h[c] + nadh[c] + accoa[c] + acald[c] | 1   | (BT_0309 and BT_0311 and BT_0312) | -1000 | 1000 | 2  | Unassigned                                 |                              | Added manually based on SEED database and KEGG                                                                                               | 2.3.1.190 |
|             | ACtr        | acetate transporter                                 | ac[e] <=> ac[c]                                                      | 1   |                                   | -1000 | 1000 | 2  | Transport, Extracellular                   | PMID:19321416, PMID:12740060 | Bacteroides species are well established to produce short-chain fatty acids (SCFAs).                                                         |           |
| rxn03841    | ADCL        | 4-aminobenzoate synthase                            | 4adcho[c] => h[c] + pyr[c] + 4abz[c]                                 | 0   | BT_0768                           | 0     | 1000 | 2  | Cofactor and Prosthetic Group Biosynthesis |                              |                                                                                                                                              | 4.1.3.38  |

| SEED Rxn ID | BIGG Rxn ID | Function                                    | Formula                                                             | Rev | GA                              | LB    | UB   | CS | Subsystem                          | Reference                    | Notes                                                                                                                                                                                                                                                 | EC Number |
|-------------|-------------|---------------------------------------------|---------------------------------------------------------------------|-----|---------------------------------|-------|------|----|------------------------------------|------------------------------|-------------------------------------------------------------------------------------------------------------------------------------------------------------------------------------------------------------------------------------------------------|-----------|
| rxn00097    | ADK1        | adenylate kinase                            | atp[c] + amp[c]<br>=> 2 adp[c]                                      | 1   | BT_4387                         | -1000 | 1000 | 2  | Nucleotide Salvage Pathway         |                              |                                                                                                                                                                                                                                                       | 2.7.4.3   |
| rxn10052    | ADK2        | adenylate kinase (Inorganic triphosphate)   | amp[c] + ppp[i][c]<br>=> adp[c] + ppi[c]                            | 1   | BT_4387                         | -1000 | 1000 | 2  | Nucleotide Salvage Pathway         |                              |                                                                                                                                                                                                                                                       | 2.7.4.3   |
| rxn05318    | ADNt2       | adenosine transport in via proton symport   | h[e] + adn[e] =><br>h[c] + adn[c]                                   | 0   | BT_4330                         | 0     | 1000 | 2  | Transport, Extracellular           |                              | Reversible in SEED                                                                                                                                                                                                                                    |           |
| rxn00927    | ADNUC       | adenosine hydrolase                         | h2o[c] + adn[c]<br>=> ade[c] + rib-D[c]                             | 0   | BT_2808                         | 0     | 1000 | 2  | Alternate Carbon Metabolism        |                              | Reversible in SEED                                                                                                                                                                                                                                    | 3.2.2.8   |
| rxn05187    | ADOCBLabc   | Adenosylcobalamin transport via ABC system  | h2o[c] + atp[c] + adocbl[e] =><br>h[c] + pi[c] + adp[c] + adocbl[c] | 0   | (BT_1799 or BT_1489)            | 0     | 1000 | 4  | Transport, Extracellular           | PMID:4853401, PMID: 19748469 | B. thetaiaotomicron requires cobalamin (vitamin B12) for growth. Gene annotation is putatively based on NCBI Gene. Cob(I)alamin adenosyltransferase gene is not essential in vitro, seems to suggest that adenosylcobalamine can also be transported. |           |
| rxn00139    | ADPT        | adenine phosphoribosyltransferase           | ade[c] + prpp[c]<br>=> amp[c] + ppi[c]                              | 0   | BT_3267                         | 0     | 1000 | 2  | Nucleotide Salvage Pathway         |                              |                                                                                                                                                                                                                                                       | 2.4.2.7   |
| rxn00361    | ADSK        | adenylyl-sulfate kinase                     | atp[c] + aps[c]<br>=> h[c] + adp[c] + paps[c]                       | 0   | BT_0413                         | 0     | 1000 | 2  | Cysteine Metabolism                |                              | Putative annotation (NCBI Gene). Reversible in SEED                                                                                                                                                                                                   | 2.7.1.25  |
| rxn00800    | ADSL1r      | adenylosuccinate lyase                      | dcamp[c] <=><br>amp[c] + fum[c]                                     | 1   | BT_3871                         | -1000 | 1000 | 2  | Purine and Pyrimidine Biosynthesis |                              |                                                                                                                                                                                                                                                       | 4.3.2.2   |
| rxn03136    | ADSL2r      | adenylosuccinate lyase                      | 25aics[c] <=><br>fum[c] + aicar[c]                                  | 1   | BT_3871                         | -1000 | 1000 | 2  | Purine and Pyrimidine Biosynthesis |                              |                                                                                                                                                                                                                                                       | 4.3.2.2   |
| rxn00838    | ADSS        | adenylosuccinate synthase                   | asp-L[c] + gtp[c] + imp[c] => 2<br>h[c] + pi[c] + dcamp[c] + gdp[c] | 0   | BT_1843                         | 0     | 1000 | 2  | Purine and Pyrimidine Biosynthesis |                              |                                                                                                                                                                                                                                                       | 6.3.4.4   |
| rxn01484    | AGDC        | N-acetylglucosamine-6-phosphate deacetylase | h2o[c] + acgam6p[c] =><br>ac[c] + gam6p[c]                          | 0   | (BT_0675 or BT_0676 or BT_3588) | 0     | 1000 | 2  | Aminosugar Metabolism              |                              |                                                                                                                                                                                                                                                       | 3.5.1.25  |

| SEED Rxn ID | BIGG Rxn ID | Function                                                              | Formula                                                    | Rev | GA                              | LB    | UB   | CS | Subsystem                       | Reference                                   | Notes                                                                                                                                     | EC Number |
|-------------|-------------|-----------------------------------------------------------------------|------------------------------------------------------------|-----|---------------------------------|-------|------|----|---------------------------------|---------------------------------------------|-------------------------------------------------------------------------------------------------------------------------------------------|-----------|
|             | AGDC2       | N-acetylglactosamine-6-phosphate amidohydrolase                       | h2o[c] + acgal6p[c] => ac[c] + galam6p[c]                  | 0   | (BT_0675 or BT_0676 or BT_3588) | 0     | 1000 | 3  | Aminosugar Metabolism           | PMID:2845859                                | B. thetaiotaomicron grows on N-acetylglactosamine. Utilization pathway is based on assumption.                                            | 3.5.1.25  |
| rxn01029    | AGMD        | Agmatine deiminase                                                    | h2o[c] + agm[c] => nh4[c] + ncptrc[c]                      | 0   | BT_0876                         | 0     | 1000 | 3  | Arginine and Proline Metabolism | PMID:10801923                               | This reaction is involved in the putrescine secretion pathway.                                                                            | 3.5.3.12  |
| rxn03511    | AGMHE       | ADP-D-glycero-D-manno-heptose epimerase                               | adpheap-DD[c] => adpheap-LD[c]                             | 0   |                                 | 0     | 1000 | 2  | Lipopolysaccharide Biosynthesis | PMID:20974832                               | No gene found, but this reaction is required for lipopolysaccharide synthesis. The structure of B. thetaiotaomicron LPS has been studied. | 5.1.3.20  |
| rxn08083    | AGPAT120    | 1-tetradecanoyl-sn-glycerol 3-phosphate O-acyltransferase (n-C12:0)   | ddcaACP[c] + 1ddecg3p[c] => ACP[c] + pa120[c]              | 0   | (BT_0243 or BT_4462)            | 0     | 1000 | 3  | Glycerophospholipid Metabolism  | PMID: 6102980, PMID: 7440508, PMID: 7204330 | The fatty acid composition of B. thetaiotaomicron was determined experimentally.                                                          | 2.3.1.51  |
| rxn08084    | AGPAT140    | 1-tetradecanoyl-sn-glycerol 3-phosphate O-acyltransferase (n-C14:0)   | myrsACP[c] + 1tdecg3p[c] => ACP[c] + pa140[c]              | 0   | (BT_0243 or BT_4462)            | 0     | 1000 | 3  | Glycerophospholipid Metabolism  | PMID: 6102980, PMID: 7440508, PMID: 7204330 | The fatty acid composition of B. thetaiotaomicron was determined experimentally.                                                          | 2.3.1.51  |
| rxn08086    | AGPAT160    | 1-hexadecanoyl-sn-glycerol 3-phosphate O-acyltransferase (n-C16:0)    | palmACP[c] + 1hdecg3p[c] => ACP[c] + pa160[c]              | 0   | (BT_0243 or BT_4462)            | 0     | 1000 | 3  | Glycerophospholipid Metabolism  | PMID: 6102980, PMID: 7440508, PMID: 7204330 | The fatty acid composition of B. thetaiotaomicron was determined experimentally.                                                          | 2.3.1.51  |
| rxn08088    | AGPAT180    | 1-octadecanoyl-sn-glycerol 3-phosphate O-acyltransferase (n-C18:0)    | 1odecg3p[c] + ocdcaACP[c] => ACP[c] + pa180[c]             | 0   | (BT_0243 or BT_4462)            | 0     | 1000 | 3  | Glycerophospholipid Metabolism  | PMID: 6102980, PMID: 7440508, PMID: 7204330 | The fatty acid composition of B. thetaiotaomicron was determined experimentally.                                                          | 2.3.1.51  |
| rxn08089    | AGPAT181    | 1-octadec-7-enoyl-sn-glycerol 3-phosphate O-acyltransferase (n-C18:1) | 1odec11eg3p[c] + octeACP[c] => ACP[c] + pa181[c]           | 0   | (BT_0243 or BT_4462)            | 0     | 1000 | 3  | Glycerophospholipid Metabolism  | PMID: 6102980, PMID: 7440508, PMID: 7204330 | The fatty acid composition of B. thetaiotaomicron was determined experimentally.                                                          | 2.3.1.51  |
| rxn02465    | AGPR        | N-acetyl-g-glutamyl-phosphate reductase                               | nadp[c] + pi[c] + acg5sa[c] <=> h[c] + nadph[c] + acg5p[c] | 1   | BT_3759                         | -1000 | 1000 | 2  | Arginine and Proline Metabolism |                                             |                                                                                                                                           | 1.2.1.38  |

| SEED Rxn ID | BIGG Rxn ID | Function                                                 | Formula                                                    | Rev | GA                                                                                                                                                                                                            | LB    | UB   | CS | Subsystem                | Reference                        | Notes                                                      | EC Number |
|-------------|-------------|----------------------------------------------------------|------------------------------------------------------------|-----|---------------------------------------------------------------------------------------------------------------------------------------------------------------------------------------------------------------|-------|------|----|--------------------------|----------------------------------|------------------------------------------------------------|-----------|
| rxn00141    | AHC         | adenosylhomocysteinas<br>e                               | h2o[c] + ahcys[c]<br><=> adn[c] +<br>hcys-L[c]             | 1   | BT_2797                                                                                                                                                                                                       | -1000 | 1000 | 2  | Methionine<br>Metabolism |                                  |                                                            | 3.3.1.1   |
| rxn00143    | AHCYSNS_r   | S-<br>adenosylhomocysteine<br>nucleosidase reversible    | h2o[c] + ahcys[c]<br><=> ade[c] +<br>rhcys[c]              | 1   | BT_4451                                                                                                                                                                                                       | -1000 | 1000 | 2  | Methionine<br>Metabolism |                                  |                                                            | 3.2.2.9   |
|             | AHEXASE2e   | N-<br>acetylglucosaminidase,<br>N-glycans, extracellular | h2o[e] +<br>s2l2n2m2m[e]<br>=> acgam[e] +<br>s2l2n2m2mn[e] | 0   | (BT_4394 or<br>BT_4395 or<br>BT_4337 or<br>BT_3598 or<br>BT_1627 or<br>BT_3868 or<br>BT_0459 or<br>BT_0460 or<br>BT_0506 or<br>BT_4681 or<br>BT_1621 or<br>BT_3178 or<br>BT_0456 or<br>BT_1051 or<br>BT_2459) | 0     | 1000 | 4  | N-Glycan<br>Degradation  | PMID:16565725,<br>PMID: 20689974 | BT_4395 gene<br>product was purified<br>and characterized. |           |
|             | AHEXASE3e   | beta-N-<br>acetylhexosaminidase,<br>extracellular        | h2o[e] + chtbs[e]<br>=> 2 acgam[e]                         | 0   | (BT_4394 or<br>BT_4395 or<br>BT_4337 or<br>BT_3598 or<br>BT_1627 or<br>BT_3868 or<br>BT_0459 or<br>BT_0460 or<br>BT_0506 or<br>BT_4681 or<br>BT_1621 or<br>BT_3178 or<br>BT_0456 or<br>BT_1051 or<br>BT_2459) | 0     | 1000 | 4  | N-Glycan<br>Degradation  | PMID:16565725,<br>PMID: 20689974 | BT_4395 gene<br>product was purified<br>and characterized. | 3.2.1.52  |

| SEED Rxn ID | BIGG Rxn ID | Function                                                     | Formula                                                                        | Rev | GA                                                                                                                                                                  | LB    | UB   | CS | Subsystem                          | Reference                                   | Notes                                                                                                                                                                                                                            | EC Number |
|-------------|-------------|--------------------------------------------------------------|--------------------------------------------------------------------------------|-----|---------------------------------------------------------------------------------------------------------------------------------------------------------------------|-------|------|----|------------------------------------|---------------------------------------------|----------------------------------------------------------------------------------------------------------------------------------------------------------------------------------------------------------------------------------|-----------|
|             | AHEXASEe    | beta-N-acetylhexosaminidase, extracellular                   | 2 h2o[e] + n2m2mn[e] => 2 acgam[e] + m2mn[e]                                   | 0   | (BT_4394 or BT_4395 or BT_4337 or BT_3598 or BT_1627 or BT_3868 or BT_0459 or BT_0460 or BT_0506 or BT_4681 or BT_1621 or BT_3178 or BT_0456 or BT_1051 or BT_2459) | 0     | 1000 | 4  | N-Glycan Degradation               | PMID:16565725, PMID: 20689974               | BT_4395 gene product was purified and characterized.                                                                                                                                                                             | 3.2.1.52  |
| rxn09997    | AHMMPS      | 4-amino-5-hydroxymethyl-2-methylpyrimidine synthetase        | 2 h[c] + air[c] => pi[c] + 4ahmmp[c] + gcald[c]                                | 0   | BT_0650                                                                                                                                                             | 0     | 1000 | 2  | Thiamine Metabolism                |                                             |                                                                                                                                                                                                                                  |           |
| rxn00952    | AHSERL2     | O-acetylhomoserine (thiol)-lyase                             | achms[c] + h2s[c] => h[c] + ac[c] + hcys-L[c]                                  | 0   | (BT_1923 or BT_2387)                                                                                                                                                | 0     | 1000 | 2  | Methionine Metabolism              |                                             |                                                                                                                                                                                                                                  | 2.5.1.49  |
| rxn06078    | AHSERL3     | O-Acetyl-L-homoserine acetate-lyase (adding methanethiol)    | achms[c] + trdrd[c] + tsul[c] <=> h[c] + ac[c] + hcys-L[c] + trdox[c] + so3[c] | 1   | (BT_1923 or BT_2387)                                                                                                                                                | -1000 | 1000 | 2  | Methionine Metabolism              |                                             | Added manually to BIGG database based on SEED database                                                                                                                                                                           | 2.5.1.49  |
| rxn03137    | AICART      | phosphoribosylaminoimidazolecarboxamide formyltransferase    | aicar[c] + 10fthf[c] <=> fprica[c] + thf[c]                                    | 1   | BT_3812                                                                                                                                                             | -1000 | 1000 | 2  | Purine and Pyrimidine Biosynthesis |                                             |                                                                                                                                                                                                                                  | 2.1.2.3   |
| rxn05452    | AIHPDCOATA  | 14-methyl-hexadecanoyl-ACP[acyl-carrier-protein] transferase | coa[c] + 14mpalmACP[c] <=> ACP[c] + aihipdcoa[c]                               | 1   | BT_0789                                                                                                                                                             | -1000 | 1000 | 3  | Glycerophospholipid Metabolism     | PMID: 6102980, PMID: 7440508, PMID: 7204330 | Added manually to BIGG database based on reaction mechanism proposed by Model SEED. This reaction is involved in fatty acid biosynthesis. B. thetaiotaomicron is well known to synthesize iso- and anteiso-branched fatty acids. | 2.3.1.180 |

| SEED Rxn ID | BIGG Rxn ID | Function                                                       | Formula                                                       | Rev | GA                              | LB    | UB   | CS | Subsystem                          | Reference                                   | Notes                                                                                                                                                                                                                            | EC Number |
|-------------|-------------|----------------------------------------------------------------|---------------------------------------------------------------|-----|---------------------------------|-------|------|----|------------------------------------|---------------------------------------------|----------------------------------------------------------------------------------------------------------------------------------------------------------------------------------------------------------------------------------|-----------|
| rxn05451    | AIPDCOATA   | 12-methyl-tetra-decanoyl-ACP[acyl-carrier-protein] transferase | coa[c] + 12mmysACP[c] <=> ACP[c] + aipdcoa[c]                 | 1   | BT_0789                         | -1000 | 1000 | 3  | Glycerophospholipid Metabolism     | PMID: 6102980, PMID: 7440508, PMID: 7204330 | Added manually to BIGG database based on reaction mechanism proposed by Model SEED. This reaction is involved in fatty acid biosynthesis. B. thetaiotaomicron is well known to synthesize iso- and anteiso-branched fatty acids. | 2.3.1.180 |
| rxn05229    | AIRC2       | phosphoribosylaminoimidazole carboxylase                       | atp[c] + hco3[c] + air[c] => h[c] + pi[c] + adp[c] + 5caiz[c] | 0   | BT_2518                         | 0     | 1000 | 2  | Purine and Pyrimidine Biosynthesis |                                             |                                                                                                                                                                                                                                  | 4.1.1.21  |
|             | AIRC3       | phosphoribosylaminoimidazole carboxylase (mutase rxn)          | 5aizc[c] <=> 5caiz[c]                                         | 1   | BT_2518                         | -1000 | 1000 | 2  | Purine and Pyrimidine Biosynthesis |                                             | According to KEGG and BIGG databases, phosphoribosylaminoimidazole carboxylase also catalyzes NCAIR mutase reaction.                                                                                                             | 4.1.1.21  |
| rxn02938    | AIRCr       | phosphoribosylaminoimidazole carboxylase                       | co2[c] + air[c] <=> h[c] + 5aizc[c]                           | 1   | BT_2518                         | -1000 | 1000 | 2  | Purine and Pyrimidine Biosynthesis |                                             | Irreversible in SEED                                                                                                                                                                                                             | 4.1.1.21  |
| rxn03167    | AKP1        | alkaline phosphatase (Dihydroneopterin)                        | 3 h2o[c] + ahdt[c] => 2 h[c] + 3 pi[c] + dhnt[c]              | 0   | (BT_0028 or BT_3708 or BT_4363) | 0     | 1000 | 4  | Folate Metabolism                  | PMID:3968032                                | Appears to be largely membrane-bound in B. thetaiotaomicron (unpublished data mentioned in PMID:3968032).                                                                                                                        | 3.1.3.1   |
| rxn00851    | ALAALA      | D-alanine--D-alanine ligase                                    | atp[c] + 2 ala-D[c] => h[c] + pi[c] + adp[c] + alaala[c]      | 0   | BT_3713                         | 0     | 1000 | 2  | Cell Envelope Biosynthesis         |                                             |                                                                                                                                                                                                                                  | 6.3.2.4   |
|             | ALAALADe    | D-alanine-D-alanine dipeptidase, extracellular                 | h2o[e] + alaala[e] => 2 ala-D[e]                              | 0   | (BT_3007 or BT_3187)            | 0     | 1000 | 2  | Peptide Degradation                | PMID:12663928                               | Predicted non-cytosolic in PMID:12663928. Assumed to be extracellular for modeling purposes.                                                                                                                                     | 3.4.17.14 |

| SEED Rxn ID | BIGG Rxn ID | Function                                          | Formula                                                                                                                           | Rev | GA                                                                                                           | LB    | UB   | CS | Subsystem                        | Reference | Notes                                                       | EC Number |
|-------------|-------------|---------------------------------------------------|-----------------------------------------------------------------------------------------------------------------------------------|-----|--------------------------------------------------------------------------------------------------------------|-------|------|----|----------------------------------|-----------|-------------------------------------------------------------|-----------|
| rxn12633    | ALAASP1c    | Hydrolysis of L-alanyl-L-aspartate                | $\text{h2o[c]} + \text{alaasp[c]} \rightleftharpoons \text{ala-L[c]} + \text{asp-L[c]}$                                           | 1   | (BT_3464 or BT_3926 or BT_3996 or BT_0149 or BT_4193 or BT_3254 or BT_1260 or BT_1261 or BT_1314 or BT_1838) | -1000 | 1000 | 2  | Peptide Degradation              |           |                                                             |           |
|             | ALAASPt     | L-alanyl-L-aspartate transport via proton symport | $\text{h[e]} + \text{alaasp[e]} \Rightarrow \text{h[c]} + \text{alaasp[c]}$                                                       | 0   | (BT_0580 or BT_4385 or BT_1086)                                                                              | 0     | 1000 | 2  | Transport, Extracellular         |           | Genes added based on TransportDB (last consulted 06.06.12). |           |
| rxn00278    | ALAD_R      | Alanine dehydrogenase                             | $\text{h2o[c]} + \text{ala-L[c]} + \text{nad[c]} \rightleftharpoons \text{h[c]} + \text{pyr[c]} + \text{nadh[c]} + \text{nh4[c]}$ | 1   | BT_1554                                                                                                      | -1000 | 1000 | 2  | Alanine and Aspartate Metabolism |           |                                                             | 1.4.1.1   |
| rxn12639    | ALAGLN1c    | Hydrolysis of L-alanyl-L-glutamine                | $\text{h2o[c]} + \text{alagln[c]} \rightleftharpoons \text{ala-L[c]} + \text{gln-L[c]}$                                           | 1   | (BT_3464 or BT_3926 or BT_3996 or BT_0149 or BT_4193 or BT_3254 or BT_1260 or BT_1261 or BT_1314 or BT_1838) | -1000 | 1000 | 2  | Peptide Degradation              |           |                                                             |           |
|             | ALAGLNt     | L-alanyl-L-glutamine transport via proton symport | $\text{h[e]} + \text{alagln[e]} \Rightarrow \text{h[c]} + \text{alagln[c]}$                                                       | 0   | (BT_0580 or BT_4385 or BT_1086)                                                                              | 0     | 1000 | 2  | Transport, Extracellular         |           | Genes added based on TransportDB (last consulted 06.06.12). |           |
| rxn12640    | ALAGLU1c    | Hydrolysis of L-alanyl-L-glutamate                | $\text{h2o[c]} + \text{alaglu[c]} \rightleftharpoons \text{glu-L[c]} + \text{ala-L[c]}$                                           | 1   | (BT_3464 or BT_3926 or BT_3996 or BT_0149 or BT_4193 or BT_3254 or BT_1260 or BT_1261 or BT_1314 or BT_1838) | -1000 | 1000 | 2  | Peptide Degradation              |           |                                                             |           |
|             | ALAGLUt     | L-alanyl-L-glutamate transport via proton symport | $\text{h[e]} + \text{alaglu[e]} \Rightarrow \text{h[c]} + \text{alaglu[c]}$                                                       | 0   | (BT_0580 or BT_4385 or BT_1086)                                                                              | 0     | 1000 | 2  | Transport, Extracellular         |           | Genes added based on TransportDB (last consulted 06.06.12). |           |

| SEED Rxn ID | BIGG Rxn ID | Function                                          | Formula                                                                                                                     | Rev | GA                                                                                                           | LB    | UB   | CS | Subsystem                        | Reference | Notes                                                       | EC Number |
|-------------|-------------|---------------------------------------------------|-----------------------------------------------------------------------------------------------------------------------------|-----|--------------------------------------------------------------------------------------------------------------|-------|------|----|----------------------------------|-----------|-------------------------------------------------------------|-----------|
| rxn12641    | ALAGLY1c    | Hydrolysis of L-alanylglycine                     | $\text{h}_2\text{o}[\text{c}] + \text{alagly}[\text{c}] \rightleftharpoons \text{ala-L}[\text{c}] + \text{gly}[\text{c}]$   | 1   | (BT_3464 or BT_3926 or BT_3996 or BT_0149 or BT_4193 or BT_3254 or BT_1260 or BT_1261 or BT_1314 or BT_1838) | -1000 | 1000 | 2  | Peptide Degradation              |           |                                                             |           |
|             | ALAGLYt     | L-alanylglycine transport via proton symport      | $\text{h}[\text{e}] + \text{alagly}[\text{e}] \Rightarrow \text{h}[\text{c}] + \text{alagly}[\text{c}]$                     | 0   | (BT_0580 or BT_4385 or BT_1086)                                                                              | 0     | 1000 | 2  | Transport, Extracellular         |           | Genes added based on TransportDB (last consulted 06.06.12). |           |
| rxn12642    | ALAHIS1c    | Hydrolysis of L-alanyl-L-histidine                | $\text{h}_2\text{o}[\text{c}] + \text{alahis}[\text{c}] \rightleftharpoons \text{ala-L}[\text{c}] + \text{his-L}[\text{c}]$ | 1   | (BT_3464 or BT_3926 or BT_3996 or BT_0149 or BT_4193 or BT_3254 or BT_1260 or BT_1261 or BT_1314 or BT_1838) | -1000 | 1000 | 2  | Peptide Degradation              |           |                                                             |           |
|             | ALAHISt     | L-alanyl-L-histidine transport via proton symport | $\text{h}[\text{e}] + \text{alahis}[\text{e}] \Rightarrow \text{h}[\text{c}] + \text{alahis}[\text{c}]$                     | 0   | (BT_0580 or BT_4385 or BT_1086)                                                                              | 0     | 1000 | 2  | Transport, Extracellular         |           | Genes added based on TransportDB (last consulted 06.06.12). |           |
| rxn12643    | ALALEU1c    | Hydrolysis of L-alanyl-L-leucine                  | $\text{h}_2\text{o}[\text{c}] + \text{alaleu}[\text{c}] \rightleftharpoons \text{ala-L}[\text{c}] + \text{leu-L}[\text{c}]$ | 1   | (BT_3464 or BT_3926 or BT_3996 or BT_0149 or BT_4193 or BT_3254 or BT_1260 or BT_1261 or BT_1314 or BT_1838) | -1000 | 1000 | 2  | Peptide Degradation              |           |                                                             |           |
|             | ALALEUt     | L-alanyl-L-leucine transport via proton symport   | $\text{h}[\text{e}] + \text{alaleu}[\text{e}] \Rightarrow \text{h}[\text{c}] + \text{alaleu}[\text{c}]$                     | 0   | (BT_0580 or BT_4385 or BT_1086)                                                                              | 0     | 1000 | 2  | Transport, Extracellular         |           | Genes added based on TransportDB (last consulted 06.06.12). |           |
| rxn00283    | ALAR        | alanine racemase                                  | $\text{ala-L}[\text{c}] \rightleftharpoons \text{ala-D}[\text{c}]$                                                          | 1   | BT_4101                                                                                                      | -1000 | 1000 | 2  | Alanine and Aspartate Metabolism |           | Annotation from KEGG and NCBI Gene (last updated 01.01.11)  | 5.1.1.1   |

| SEED Rxn ID | BIGG Rxn ID | Function                                          | Formula                                         | Rev | GA                                                                                                           | LB    | UB   | CS | Subsystem                      | Reference                                | Notes                                                                                                     | EC Number |
|-------------|-------------|---------------------------------------------------|-------------------------------------------------|-----|--------------------------------------------------------------------------------------------------------------|-------|------|----|--------------------------------|------------------------------------------|-----------------------------------------------------------------------------------------------------------|-----------|
| rxn05496    | ALAt4r      | Alanine-Sodium symporter                          | nal[e] + ala-L[e]<br><=> ala-L[c] + nal[c]      | 1   | BT_4476                                                                                                      | -1000 | 1000 | 2  | Transport, Extracellular       |                                          | Annotation from TransportDB (www.membranetransport.org).                                                  |           |
| rxn12644    | ALATHR1c    | Hydrolysis of L-alanyl-L-threonine                | h2o[c] + alathr[c]<br><=> ala-L[c] + thr-L[c]   | 1   | (BT_3464 or BT_3926 or BT_3996 or BT_0149 or BT_4193 or BT_3254 or BT_1260 or BT_1261 or BT_1314 or BT_1838) | -1000 | 1000 | 2  | Peptide Degradation            |                                          |                                                                                                           |           |
|             | ALATHRt     | L-alanyl-L-threonine transport via proton symport | h[e] + alathr[e]<br>=> h[c] + alathr[c]         | 0   | (BT_0580 or BT_4385 or BT_1086)                                                                              | 0     | 1000 | 2  | Transport, Extracellular       |                                          | Genes added based on TransportDB (last consulted 06.06.12).                                               |           |
| rxn00763    | ALCD19      | alcohol dehydrogenase (glycerol)                  | h[c] + nadh[c] + glyald[c] <=> nad[c] + glyc[c] | 1   | (BT_0535 or BT_4512)                                                                                         | -1000 | 1000 | 2  | Alternate Carbon Metabolism    |                                          | This reaction was included by Model SEED, but may not take place. in B. thetaiotaomicron.                 | 1.1.1.1   |
| rxn00543    | ALCD2x      | alcohol dehydrogenase (ethanol)                   | nad[c] + etoh[c] <=> h[c] + nadh[c] + acald[c]  | 1   | (BT_0535 or BT_4512)                                                                                         | -1000 | 1000 | 2  | Central Metabolism             | PMID:17563350 supports genome annotation |                                                                                                           | 1.1.1.1   |
| rxn00743    | ALKP        | alkaline phosphatase                              | h2o[c] + dhap[c] => pi[c] + dha[c]              | 0   | (BT_0028 or BT_3708 or BT_4363)                                                                              | 0     | 1000 | 4  | Glycerophospholipid Metabolism | PMID:3968032                             | Appears to be largely membrane-bound in B. thetaiotaomicron (unpublished data mentioned in PMID:3968032). | 3.1.3.1   |

| SEED Rxn ID | BIGG Rxn ID | Function                         | Formula                                            | Rev | GA                   | LB | UB   | CS | Subsystem                      | Reference                                  | Notes                                                                                                                                                                                                                                                                                                                               | EC Number |
|-------------|-------------|----------------------------------|----------------------------------------------------|-----|----------------------|----|------|----|--------------------------------|--------------------------------------------|-------------------------------------------------------------------------------------------------------------------------------------------------------------------------------------------------------------------------------------------------------------------------------------------------------------------------------------|-----------|
|             | ALR2        | aldose reductase (methylglyoxal) | h[c] + nadph[c] + mthgxl[c] => nadp[c] + acetol[c] | 0   |                      | 0  | 1000 | 2  | Central Metabolism             | PMID:18848625, PMID:8370454, PMID:11260473 | No GPR is known. The reaction is putatively added to reconcile the results by PMID:18848625, which suggest the presence of a second pathway for 1,2-propanediol formation in B. thetaiotaomicron. Also based on pathways described by PMID:8370454. There is evidence for acetol production in B. thetaiotaomicron (PMID:11260473). | 1.1.1.21  |
|             | ALR4x       | aldose reductase (acetol)        | h[c] + nadh[c] + acetol[c] => 12ppd-R[c] + nad[c]  | 0   | (BT_3617 or BT_4424) | 0  | 1000 | 3  | Glycerophospholipid Metabolism | PMID:18848625, PMID:8370454                | The reaction is carried out by sorbitol dehydrogenase. Added to reconcile the results by PMID:18848625, which suggest the presence of a second pathway for 1,2-propanediol formation in B. thetaiotaomicron. Also based on pathways described by PMID:8370454.                                                                      |           |
| rxn01122    | ALTRH       | altronate hydrolase              | altrn[c] => h2o[c] + 2ddgln[c]                     | 0   | BT_0486              | 0  | 1000 | 2  | Alternate Carbon Metabolism    |                                            |                                                                                                                                                                                                                                                                                                                                     | 4.2.1.7   |

| SEED Rxn ID | BIGG Rxn ID | Function                           | Formula                                      | Rev | GA                                                                                                                      | LB | UB   | CS | Subsystem                   | Reference | Notes              | EC Number |
|-------------|-------------|------------------------------------|----------------------------------------------|-----|-------------------------------------------------------------------------------------------------------------------------|----|------|----|-----------------------------|-----------|--------------------|-----------|
| rxn02875    | AMAA        | N-acetylmuramoyl-L-alanine amidase | h2o[c] + acmama[c] => ala-L[c] + acmam[c]    | 0   | (BT_1991 or BT_2027 or BT_2141 or BT_3200 or BT_4736 or BT_0706 or BT_1168 or BT_1519 or BT_1641 or BT_1706 or BT_4031) | 0  | 1000 | 2  | Cell Envelope Biosynthesis  |           |                    | 3.5.1.28  |
| rxn08126    | AMALT1      | Amylomaltase (maltotriose)         | malt[c] + malttr[c] => glc-D[c] + malttr[c]  | 0   | BT_2146                                                                                                                 | 0  | 1000 | 2  | Alternate Carbon Metabolism |           | Reversible in SEED | 2.4.1.25  |
| rxn08127    | AMALT2      | Amylomaltase (maltotetraose)       | malt[c] + maltttr[c] => glc-D[c] + maltpt[c] | 0   | BT_2146                                                                                                                 | 0  | 1000 | 2  | Alternate Carbon Metabolism |           | Reversible in SEED | 2.4.1.25  |
| rxn08128    | AMALT3      | Amylomaltase (maltopentaose)       | malt[c] + maltpt[c] => glc-D[c] + malthx[c]  | 0   | BT_2146                                                                                                                 | 0  | 1000 | 2  | Alternate Carbon Metabolism |           | Reversible in SEED | 2.4.1.25  |
| rxn08129    | AMALT4      | Amylomaltase (maltohexaose)        | malt[c] + malthx[c] => glc-D[c] + malthp[c]  | 0   | BT_2146                                                                                                                 | 0  | 1000 | 2  | Alternate Carbon Metabolism |           | Reversible in SEED | 2.4.1.25  |

| SEED Rxn ID | BIGG Rxn ID | Function                                                                   | Formula                                           | Rev | GA                                                                                                                                                                                                                                                                                                                          | LB    | UB   | CS | Subsystem                                  | Reference                      | Notes                                                                                                                                                                                                                                                                           | EC Number |
|-------------|-------------|----------------------------------------------------------------------------|---------------------------------------------------|-----|-----------------------------------------------------------------------------------------------------------------------------------------------------------------------------------------------------------------------------------------------------------------------------------------------------------------------------|-------|------|----|--------------------------------------------|--------------------------------|---------------------------------------------------------------------------------------------------------------------------------------------------------------------------------------------------------------------------------------------------------------------------------|-----------|
|             | AMANNANASEc | Alpha-mannan degradation, extracellular                                    | 139 h2o[e] + amannan140[e] <=> 140 man[e]         | 1   | ((BT_3990 or BT_2629 or BT_2199 or BT_3784 or BT_3962 or BT_4092) and (BT_3991 or BT_3858 or BT_1769 or BT_1878 or BT_3130 or BT_3773) and (BT_3994 or BT_3792 or BT_2623 or BT_2949 or BT_3501 or BT_1883 or BT_3524 or BT_3301 or BT_3521) and ((BT_2625 and BT_2626) or (BT_3788 and BT_3789) or (BT_3854 and BT_3855))) | -1000 | 1000 | 4  | N-Glycan Degradation                       | PMID: 22205877, PMID: 20081828 | B. thetaiotaomicron grows on yeast alpha-mannan. The enzymes carrying out the reaction are assumed to be secreted. The reaction involves cleaving of alpha-1,2, -1,3 and -1,6 bonds. Several susC and susD are upregulated during growth on alpha-mannan (included in the GPR). |           |
| rxn02312    | AMAOTr      | adenosylmethionine-8-amino-7-oxononanoate transaminase                     | 8aonn[c] + amet[c] <=> amob[c] + dann[c]          | 1   | BT_1442                                                                                                                                                                                                                                                                                                                     | -1000 | 1000 | 4  | Cofactor and Prosthetic Group Biosynthesis | PMID:4853401, PMID:20693992    | B. thetaiotaomicron does not require biotin (PMID:4853401). Most likely, biotin is synthesized as described in PMID:20693992.                                                                                                                                                   | 2.6.1.62  |
|             | AMMQLT8     | S-adenosylmethione:2-demethylmenaquinole methyltransferase (menaquinone 8) | amet[c] + 2dmmql8[c] => h[c] + ahcys[c] + mql8[c] | 0   | (BT_0853 or BT_4216)                                                                                                                                                                                                                                                                                                        | 0     | 1000 | 3  | Cofactor and Prosthetic Group Biosynthesis | PMID:6102980                   | B. thetaiotaomicron produces menaquinone 8.                                                                                                                                                                                                                                     | 2.1.1.-   |

| SEED Rxn ID | BIGG Rxn ID | Function                                                                   | Formula                                            | Rev | GA                   | LB | UB   | CS | Subsystem                                  | Reference    | Notes                                                                                                                                                     | EC Number |
|-------------|-------------|----------------------------------------------------------------------------|----------------------------------------------------|-----|----------------------|----|------|----|--------------------------------------------|--------------|-----------------------------------------------------------------------------------------------------------------------------------------------------------|-----------|
|             | AMMQT10     | S-adenosylmethione:2-demthylmenaquinone methyltransferase (menaquinone 10) | h[c] + amet[c] + 2dmmq10[c] => ahcys[c] + mql10[c] | 0   | (BT_0853 or BT_4216) | 0  | 1000 | 4  | Cofactor and Prosthetic Group Biosynthesis | PMID:6102980 | B. thetaiotaomicron produces menaquinone 7,8,9,10 and 11. MK-10 and MK-11 are the main components. Reaction is not charge balanced. Needs to be fixed. AH |           |
|             | AMMQT11     | S-adenosylmethione:2-demthylmenaquinone methyltransferase (menaquinone 11) | h[c] + amet[c] + 2dmmq11[c] => ahcys[c] + mql11[c] | 0   | (BT_0853 or BT_4216) | 0  | 1000 | 4  | Cofactor and Prosthetic Group Biosynthesis | PMID:6102980 | B. thetaiotaomicron produces menaquinone 7,8,9,10 and 11. MK-10 and MK-11 are the main components. Reaction is not charge balanced. Needs to be fixed. AH |           |
|             | AMMQT7      | S-adenosylmethione:2-demthylmenaquinone methyltransferase (menaquinone 7)  | h[c] + amet[c] + 2dmmq7[c] => ahcys[c] + mql7[c]   | 0   | (BT_0853 or BT_4216) | 0  | 1000 | 4  | Cofactor and Prosthetic Group Biosynthesis | PMID:6102980 | B. thetaiotaomicron produces menaquinone 7,8,9,10 and 11. MK-10 and MK-11 are the main components. Reaction is not charge balanced. Needs to be fixed. AH |           |
| rxn10094    | AMMQT8      | S-adenosylmethione:2-demthylmenaquinone methyltransferase (menaquinone 8)  | h[c] + amet[c] + 2dmmq8[c] => ahcys[c] + mql8[c]   | 0   | (BT_0853 or BT_4216) | 0  | 1000 | 4  | Cofactor and Prosthetic Group Biosynthesis | PMID:6102980 | B. thetaiotaomicron produces menaquinone 7,8,9,10 and 11. MK-10 and MK-11 are the main components. Reaction is not charge balanced. Needs to be fixed. AH |           |

| SEED Rxn ID | BIGG Rxn ID | Function                                                                  | Formula                                          | Rev | GA                                                                                                            | LB | UB   | CS | Subsystem                                  | Reference                                                               | Notes                                                                                                                                                     | EC Number |
|-------------|-------------|---------------------------------------------------------------------------|--------------------------------------------------|-----|---------------------------------------------------------------------------------------------------------------|----|------|----|--------------------------------------------|-------------------------------------------------------------------------|-----------------------------------------------------------------------------------------------------------------------------------------------------------|-----------|
|             | AMMQT9      | S-adenosylmethione:2-demthylmenaquinone methyltransferase (menaquinone 9) | h[c] + amet[c] + 2dmmq9[c] => ahcys[c] + mql9[c] | 0   | (BT_0853 or BT_4216)                                                                                          | 0  | 1000 | 4  | Cofactor and Prosthetic Group Biosynthesis | PMID:6102980                                                            | B. thetaiotaomicron produces menaquinone 7,8,9,10 and 11. MK-10 and MK-11 are the main components. Reaction is not charge balanced. Needs to be fixed. AH |           |
| rxn00131    | AMPN        | AMP nucleosidase                                                          | h2o[c] + amp[c] => ade[c] + r5p[c]               | 0   | BT_0888                                                                                                       | 0  | 1000 | 2  | Nucleotide Salvage Pathway                 |                                                                         | Reversible in SEED                                                                                                                                        | 3.2.2.4   |
| rxn00650    | AMPTASECG   | alanyl aminopeptidase (cys-gly)                                           | h2o[c] + cgly[c] => gly[c] + cys-L[c]            | 0   | (BT_0638 or BT_1615 or BT_2706 or BT_4045)                                                                    | 0  | 1000 | 2  | Peptide Degradation                        |                                                                         |                                                                                                                                                           | 3.4.11.2  |
|             | AMPTASEPG   | aminopeptidase (pro-gly)                                                  | h2o[c] + progly[c] => gly[c] + pro-L[c]          | 0   | (BT_3464 or BT_3926 or BT_3996 or BT_0149 or BT_4193 or BT_3254 or BT_1260 or BT_1261 or BT_1314)             | 0  | 1000 | 2  | Peptide Degradation                        |                                                                         |                                                                                                                                                           |           |
|             | AMPTASEPGe  | hydrolysis of Prolylglycine by predicted non-cytosolic proline peptidase  | h2o[e] + progly[e] => pro-L[e] + gly[e]          | 0   | BT_0587                                                                                                       | 0  | 1000 | 2  | Peptide Degradation                        | PMID:12663928                                                           | Predicted non-cytosolic in PMID:12663928. Assumed to be extracellular for modeling purposes.                                                              | 3.4.13.9  |
|             | AMY1e       | alpha-amylase, extracellular (strch1 -> strch2)                           | 8 h2o[e] + strch1[e] => 8 glc-D[e] + strch2[e]   | 0   | ((BT_3698 and BT_3701 and BT_3702) or (BT_0773 and BT_3701 and BT_3702) or (BT_4305 and BT_3701 and BT_3702)) | 0  | 1000 | 4  | Plant Polysaccharide Degradation           | PMID:10986238, PMID:2722747, PMID:8955399, PMID:18981178, PMID:18611383 | Starch utilization by B. thetaiotaomicron as sole carbon source is well established.                                                                      | 3.2.1.1   |

| SEED Rxn ID | BIGG Rxn ID | Function                                                         | Formula                                                                  | Rev | GA                                                                                                            | LB    | UB   | CS | Subsystem                                          | Reference                                                               | Notes                                                                                                                        | EC Number |
|-------------|-------------|------------------------------------------------------------------|--------------------------------------------------------------------------|-----|---------------------------------------------------------------------------------------------------------------|-------|------|----|----------------------------------------------------|-------------------------------------------------------------------------|------------------------------------------------------------------------------------------------------------------------------|-----------|
|             | AMYe        | starch hydrolysis by alpha-1,4-amylase and alpha-1,6 pullulanase | 499 h2o[e] + starch1200[e] => 100 glc-D[e] + 100 malt[e] + 300 malttr[e] | 0   | ((BT_3698 and BT_3701 and BT_3702) or (BT_0773 and BT_3701 and BT_3702) or (BT_4305 and BT_3701 and BT_3702)) | 0     | 1000 | 4  | Plant Polysaccharide Degradation                   | PMID:10986238, PMID:2722747, PMID:8955399, PMID:18981178, PMID:18611383 | Starch utilization by B. thetaiotaomicron as sole carbon source is well established.                                         | 3.2.1.1   |
|             | AMYLE       | amylose hydrolysis by alpha-1,4-amylase                          | 199 h2o[e] + amylose300[e] => 100 glc-D[e] + 100 malt[e]                 | 0   | ((BT_3698 and BT_3701 and BT_3702) or (BT_0773 and BT_3701 and BT_3702) or (BT_4305 and BT_3701 and BT_3702)) | 0     | 1000 | 4  | Plant Polysaccharide Degradation                   | PMID:10986238, PMID:2722747, PMID:8955399, PMID:18981178, PMID:18611383 | Starch utilization by B. thetaiotaomicron as sole carbon source is well established.                                         | 3.2.1.1   |
| rxn00791    | ANPRT       | anthranilate phosphoribosyltransferase                           | prpp[c] + anth[c] => ppi[c] + pran[c]                                    | 0   | BT_0530                                                                                                       | 0     | 1000 | 2  | Tyrosine, Tryptophan, and Phenylalanine Metabolism |                                                                         |                                                                                                                              | 2.4.2.18  |
| rxn00727    | ANS         | anthranilate synthase                                            | gln-L[c] + chor[c] => h[c] + glu-L[c] + pyr[c] + anth[c]                 | 0   | (BT_0531 and BT_0532)                                                                                         | 0     | 1000 | 2  | Tyrosine, Tryptophan, and Phenylalanine Metabolism |                                                                         |                                                                                                                              | 4.1.3.27  |
| rxn00726    | ANS2        | anthranilate synthase 2                                          | nh4[c] + chor[c] => h2o[c] + h[c] + pyr[c] + anth[c]                     | 0   | (BT_0531 and BT_0532)                                                                                         | 0     | 1000 | 2  | Tyrosine, Tryptophan, and Phenylalanine Metabolism |                                                                         |                                                                                                                              | 4.1.3.27  |
| rxn02666    | AOBUTDs     | L-2-amino-3-oxobutanoate decarboxylation (spontaneous)           | h[c] + 2aobut[c] => co2[c] + aact[c]                                     | 0   |                                                                                                               | 0     | 1000 | 1  | Threonine and Lysine Metabolism                    |                                                                         |                                                                                                                              |           |
| rxn02297    | AOXSr       | 8-amino-7-oxononanoate synthase                                  | h[c] + ala-L[c] + pmcoa[c] <=> coa[c] + co2[c] + 8aonn[c]                | 1   | (BT_0870 or BT_1443)                                                                                          | -1000 | 1000 | 4  | Cofactor and Prosthetic Group Biosynthesis         | PMID:20693992                                                           | Irreversible reaction in SEED. This enzyme was recently shown to use pimeloyl-ACP. It is assumed to utilize both substrates. | 2.3.1.47  |

| SEED Rxn ID | BIGG Rxn ID  | Function                                          | Formula                                                                     | Rev | GA                                                                                                                                                                                                                                                                  | LB    | UB   | CS | Subsystem                                  | Reference                      | Notes                                                                                                                                                                                                                                                            | EC Number |
|-------------|--------------|---------------------------------------------------|-----------------------------------------------------------------------------|-----|---------------------------------------------------------------------------------------------------------------------------------------------------------------------------------------------------------------------------------------------------------------------|-------|------|----|--------------------------------------------|--------------------------------|------------------------------------------------------------------------------------------------------------------------------------------------------------------------------------------------------------------------------------------------------------------|-----------|
|             | AOXSr2       | 8-amino-7-oxononanoate synthase (pimeloyl-ACP)    | h[c] + ala-L[c] + pmACP[c] <=> ACP[c] + co2[c] + 8aonn[c]                   | 1   | (BT_0870 or BT_1443)                                                                                                                                                                                                                                                | -1000 | 1000 | 4  | Biotin Metabolism                          | PMID:20693992                  | This enzyme is generally believed to utilize pimeloyl-CoA. Use of pimeloyl-ACP was recently shown.                                                                                                                                                               | 2.3.1.47  |
| rxn02474    | APRAUR       | 5-amino-6-(5-phosphoribosylamino)uracil reductase | h[c] + nadph[c] + 5apru[c] => nadp[c] + 5aprbu[c]                           | 0   | BT_3728                                                                                                                                                                                                                                                             | 0     | 1000 | 2  | Cofactor and Prosthetic Group Biosynthesis |                                |                                                                                                                                                                                                                                                                  | 1.1.1.193 |
| rxn09988    | ARABASE3e    | arabinotriose arabinosidase                       | 2 h2o[e] + arabtr[e] => 3 arab-L[e]                                         | 0   | (BT_0348 or BT_3096 or BT_3657)                                                                                                                                                                                                                                     | 0     | 1000 | 4  | Plant Polysaccharide Degradation           | PMID: 21339299                 | Takes place in periplasm. Extracellular for modelling purposes.                                                                                                                                                                                                  | 3.2.1.55  |
|             | ARABINANASEe | Arabinan degradation, extracellular               | 100 h2o[e] + arabinan101[e] <=> 97 arab-L[e] + gal[e] + rmn[e] + 2 galur[e] | 1   | ((BT_0360 or BT_0367 or BT_0368 or BT_0369) and (BT_4152 or BT_4667 or BT_4668) and (BT_4153 or BT_4170) and (BT_4175 or BT_4176) and ((BT_0361 and BT_0362) or (BT_4164 and BT_4165) or (BT_0363 and BT_0364) or (BT_4670 and BT_4671) or (BT_3680 and BT_3681)))) | -1000 | 1000 | 4  | Plant Polysaccharide Degradation           | PMID: 22205877, PMID: 21339299 | B. thetaiotaomicron grows on arabinan. BT_0360, BT_0367 and BT_0369 are active against sugar beet arabinan. susC/ susD homologs and enzymes for galactose, galacturonate and L-rhamnose degradation (included in GPR) are upregulated during growth on arabinan. |           |

| SEED Rxn ID | BIGG Rxn ID    | Function                                                                                                                        | Formula                                                                         | Rev | GA                                                                                                                                                                           | LB     | UB   | CS | Subsystem                        | Reference                                                              | Notes                                                                                                                                                                                                                                                                                                                                                                                                  | EC Number |
|-------------|----------------|---------------------------------------------------------------------------------------------------------------------------------|---------------------------------------------------------------------------------|-----|------------------------------------------------------------------------------------------------------------------------------------------------------------------------------|--------|------|----|----------------------------------|------------------------------------------------------------------------|--------------------------------------------------------------------------------------------------------------------------------------------------------------------------------------------------------------------------------------------------------------------------------------------------------------------------------------------------------------------------------------------------------|-----------|
|             | ARABINOGLAS Ee | Arabinogalactan degradation by beta-galactosidase, endo-arabinofuranosidase and beta-glucuronidase, extracellular/periplasmatic | 659 h2o[e] + arabinogal[e] => 15 h[e] + 92 arab-L[e] + 552 gal[e] + 15 glcur[e] | 0   | ((BT_0348 or BT_0265 or BT_3675 or BT_3685) and BT_0290 and BT_3687 and ((BT_3045 and BT_3046) or (BT_0268 and BT_0269) or (BT_0272 and BT_0273) or (BT_3680 and BT_3681)))) | 0      | 1000 | 4  | Plant Polysaccharide Degradation | PMID:848954, PMID:7251978, PMID:16887514 PMID:10820072, PMID: 22205877 | B. thetaiotaomicron degrades larch arabinogalactan, which consists of galactose/arabinose (6:1) and small amounts of glucuronic acid. Larch AG is likely degraded via beta-galactosidase, Arabinan endo-1,5-alpha-L-arabinosidase (EC 3.2.1.99) and Alpha-N-arabinofuranosidase (EC 3.2.1.55) and involves susC/ susD. The genes included in the GPR are upregulated during growth on arabinogalactan. |           |
| rxn01292    | ARAI           | L-arabinose isomerase                                                                                                           | arab-L[c] <=> rbl-L[c]                                                          | 1   | BT_0351                                                                                                                                                                      | -1.000 | 1000 | 2  | Alternate Carbon Metabolism      |                                                                        |                                                                                                                                                                                                                                                                                                                                                                                                        | 5.3.1.4   |
| rxn05500    | ARBt2r         | L-arabinose transport via proton symport                                                                                        | h[e] + arab-L[e] <=> h[c] + arab-L[c]                                           | 1   | BT_0454                                                                                                                                                                      | -1000  | 1000 | 4  | Transport, Extracellular         | PMID: 21339299, PMID: 16887504                                         | PMID: 21339299: evidence for arabinose uptake. B. thetaiotaomicron grows on arabinose (i.e. PMID: 16887504)                                                                                                                                                                                                                                                                                            |           |
| rxn05154    | ARGabc         | L-arginine transport via ABC system                                                                                             | h2o[c] + atp[c] + arg-L[e] => h[c] + pi[c] + adp[c] + arg-L[c]                  | 0   | BT_4049                                                                                                                                                                      | 0      | 1000 | 2  | Transport, Extracellular         |                                                                        | Annotation from NCBI Gene (last updated 01.01.11)                                                                                                                                                                                                                                                                                                                                                      |           |
|             | ARGARG1c       | Hydrolysis of L-argininyl-L-arginine                                                                                            | h2o[c] + argarg[c] <=> 2 arg-L[c]                                               | 1   | BT_1846                                                                                                                                                                      | -1000  | 1000 | 4  | Peptide Degradation              | PMID: 22628297                                                         | B. thetaiotaomicron peptidase M49 was characterized and shown to hydrolyze Arg-Arg and Phe-Arg specifically.                                                                                                                                                                                                                                                                                           |           |

| SEED Rxn ID | BIGG Rxn ID | Function                                             | Formula                                                              | Rev | GA                              | LB    | UB   | CS | Subsystem                                          | Reference                   | Notes                                                                                                                            | EC Number |
|-------------|-------------|------------------------------------------------------|----------------------------------------------------------------------|-----|---------------------------------|-------|------|----|----------------------------------------------------|-----------------------------|----------------------------------------------------------------------------------------------------------------------------------|-----------|
|             | ARGARGt     | L-argininyl-L-arginine transport via proton symport  | h[e] + argarg[e] <=> h[c] + argarg[c]                                | 1   | (BT_0580 or BT_4385 or BT_1086) | -1000 | 1000 | 4  | Transport, Extracellular                           | PMID: 22628297              | B. thetaiotaomicron peptidase M49 was characterized and shown to hydrolyze Arg-Arg and Phe-Arg specifically.                     |           |
| rxn00405    | ARGDC       | arginine decarboxylase                               | h[c] + arg-L[c] => co2[c] + agm[c]                                   | 0   | BT_3394                         | 0     | 1000 | 2  | Arginine and Proline Metabolism                    |                             |                                                                                                                                  | 4.1.1.19  |
| rxn00394    | ARGN        | arginase                                             | h2o[c] + arg-L[c] => orn[c] + urea[c]                                | 0   | BT_1099                         | 0     | 1000 | 2  | Arginine and Proline Metabolism                    |                             | Putative gene annotation                                                                                                         | 3.5.3.1   |
| rxn00802    | ARGSL       | argininosuccinate lyase                              | argsuc[c] <=> fum[c] + arg-L[c]                                      | 1   | BT_3733                         | -1000 | 1000 | 2  | Alanine and Aspartate Metabolism                   |                             |                                                                                                                                  | 4.3.2.1   |
| rxn01434    | ARGSSr      | argininosuccinate synthase, reversible               | atp[c] + asp-L[c] + citr-L[c] <=> h[c] + amp[c] + ppi[c] + argsuc[c] | 1   | BT_3760                         | -1000 | 1000 | 2  | Arginine and Proline Metabolism                    |                             |                                                                                                                                  | 6.3.4.5   |
|             | AROH        | L-Aroenate hydro-lyase                               | Largn[c] => h2o[c] + co2[c] + phe-L[c]                               | 0   | BT_3936                         | 0     | 1000 | 2  | Tyrosine, Tryptophan, and Phenylalanine Metabolism |                             | Added based on KEGG Pathway                                                                                                      | 4.2.1.51  |
|             | AS3TASE_HS1 | N-acetylglucosamine-3-sulfatase, heparin degradation | h2o[e] + hspg_degr_4[e] => h[e] + hspg_degr_5[e] + so4[e]            | 0   |                                 | 0     | 1000 | 2  | Glycosaminoglycan Degradation                      | PMID:19801541, PMID:7574611 | B.thetaiotaomicron specific putative heparin sulfate degradation pathway. It is unknown which sulfatase catalyzes this reaction. | 3.1.6.14  |
|             | AS3TASE_HS2 | N-acetylglucosamine-3-sulfatase, heparin degradation | h2o[e] + hspg_degr_9[e] => h[e] + so4[e] + hspg_degr_10[e]           | 0   |                                 | 0     | 1000 | 2  | Glycosaminoglycan Degradation                      | PMID:19801541, PMID:7574611 | B.thetaiotaomicron specific putative heparin sulfate degradation pathway. It is unknown which sulfatase catalyzes this reaction. | 3.1.6.14  |

| SEED Rxn ID | BIGG Rxn ID | Function                                             | Formula                                                                               | Rev | GA                              | LB    | UB   | CS | Subsystem                                  | Reference                                                                                                                | Notes                                                                                                                                     | EC Number |
|-------------|-------------|------------------------------------------------------|---------------------------------------------------------------------------------------|-----|---------------------------------|-------|------|----|--------------------------------------------|--------------------------------------------------------------------------------------------------------------------------|-------------------------------------------------------------------------------------------------------------------------------------------|-----------|
|             | AS6TASE_HS1 | N-acetylglucosamine-6-sulfatase, heparin degradation | 2 h2o[e] + hspg_degr_3[e] => 2 h[e] + hspg_degr_4[e] + 2 so4[e]                       | 0   | (BT_4656 and BT_0238)           | 0     | 1000 | 4  | Glycosaminoglycan Degradation              | PMID:19801541, PMID:7574611, PMID:21507958                                                                               | B. thetaiotaomicron specific putative heparin sulfate degradation pathway. Requires sulfatase-maturing enzyme (BT_0238) to be functional. | 3.1.6.14  |
|             | AS6TASE_HS2 | N-acetylglucosamine-6-sulfatase, heparin degradation | h2o[e] + hspg_degr_8[e] => h[e] + so4[e] + hspg_degr_9[e]                             | 0   | (BT_4656 and BT_0238)           | 0     | 1000 | 4  | Glycosaminoglycan Degradation              | PMID:19801541, PMID:7574611, PMID:21507958                                                                               | B. thetaiotaomicron specific putative heparin sulfate degradation pathway. Requires sulfatase-maturing enzyme (BT_0238) to be functional. | 3.1.6.14  |
| rxn01643    | ASADi       | Aspartate-semialdehyde dehydrogenase                 | h[c] + nadph[c] + 4pasp[c] => nadp[c] + pi[c] + aspsa[c]                              | 0   | BT_3636                         | 0     | 1000 | 2  | Threonine and Lysine Metabolism            |                                                                                                                          |                                                                                                                                           | 1.2.1.11  |
| rxn00342    | ASNN        | L-asparaginase                                       | h2o[c] + asn-L[c] => asp-L[c] + nh4[c]                                                | 0   | (BT_0526 or BT_2404 or BT_2757) | 0     | 1000 | 2  | Alanine and Aspartate Metabolism           |                                                                                                                          |                                                                                                                                           | 3.5.1.1   |
| rxn00416    | ASNS1       | asparagine synthase (glutamine-hydrolysing)          | h2o[c] + atp[c] + asp-L[c] + gln-L[c] => h[c] + glu-L[c] + amp[c] + ppi[c] + asn-L[c] | 0   | BT_0551                         | 0     | 1000 | 2  | Alanine and Aspartate Metabolism           |                                                                                                                          |                                                                                                                                           | 6.3.5.4   |
| rxn00340    | ASNS2       | asparagine synthetase                                | atp[c] + asp-L[c] + nh4[c] => h[c] + amp[c] + ppi[c] + asn-L[c]                       | 0   | BT_2129                         | 0     | 1000 | 2  | Alanine and Aspartate Metabolism           |                                                                                                                          |                                                                                                                                           | 6.3.1.1   |
|             | ASNt2r      | L-asparagine reversible transport via proton symport | h[e] + asn-L[e] <=> h[c] + asn-L[c]                                                   | 1   |                                 | -1000 | 1000 | 2  | Transport, Extracellular                   | Dworkin, M. and S. Falkow (2006). The prokaryotes : a handbook on the biology of bacteria. New York ; [London], Springer | B. thetaiotaomicron is weakly proteolytic, so a transport reaction for all amino acids is assumed.                                        |           |
| rxn00346    | ASP1DC      | aspartate 1-decarboxylase                            | h[c] + asp-L[c] => co2[c] + ala-B[c]                                                  | 0   | BT_4309                         | 0     | 1000 | 2  | Cofactor and Prosthetic Group Biosynthesis |                                                                                                                          |                                                                                                                                           | 4.1.1.15  |

| SEED Rxn ID | BIGG Rxn ID | Function                                            | Formula                                                | Rev | GA                              | LB    | UB   | CS | Subsystem                                  | Reference                                                                                                                | Notes                                                                                                                                                                                                                      | EC Number |
|-------------|-------------|-----------------------------------------------------|--------------------------------------------------------|-----|---------------------------------|-------|------|----|--------------------------------------------|--------------------------------------------------------------------------------------------------------------------------|----------------------------------------------------------------------------------------------------------------------------------------------------------------------------------------------------------------------------|-----------|
| rxn01018    | ASPCT       | aspartate carbamoyltransferase                      | asp-L[c] + cbp[c] => h[c] + pi[c] + cbasp[c]           | 0   | (BT_0741 and BT_0742)           | 0     | 1000 | 2  | Purine and Pyrimidine Biosynthesis         |                                                                                                                          |                                                                                                                                                                                                                            | 2.1.3.2   |
| rxn00337    | ASPK        | aspartate kinase                                    | atp[c] + asp-L[c] <=> adp[c] + 4pasp[c]                | 1   | (BT_1375 or BT_1901 or BT_2403) | -1000 | 1000 | 2  | Threonine and Lysine Metabolism            |                                                                                                                          |                                                                                                                                                                                                                            | 2.7.2.4   |
| rxn00262    | ASPO1       | L-aspartate oxidase                                 | h2o[c] + asp-L[c] + o2[c] => nh4[c] + h2o2[c] + oaa[c] | 0   | BT_3184                         | 0     | 1000 | 2  | Cofactor and Prosthetic Group Biosynthesis | PMID:11863440                                                                                                            | O2 can be replaced by fumarate as electron acceptor, yielding succinate. The ability of the enzyme to use both O2 and fumarate in cofactor reoxidation enables it to function under both aerobic and anaerobic conditions. | 1.4.3.16  |
|             | ASPO5       | L-aspartate oxidase                                 | fum[c] + asp-L[c] => h[c] + iasp[c] + succ[c]          | 0   | BT_3184                         | 0     | 1000 | 2  | Cofactor and Prosthetic Group Biosynthesis | PMID:11863440                                                                                                            | O2 can be replaced by fumarate as electron acceptor, yielding succinate. The ability of the enzyme to use both O2 and fumarate in cofactor reoxidation enables it to function under both aerobic and anaerobic conditions. | 1.4.3.16  |
| rxn00338    | ASPO6       | L-aspartate oxidase                                 | asp-L[c] + o2[c] => h[c] + h2o2[c] + iasp[c]           | 0   | BT_3184                         | 0     | 1000 | 2  | Cofactor and Prosthetic Group Biosynthesis |                                                                                                                          |                                                                                                                                                                                                                            | 1.4.3.16  |
| rxn00347    | ASPT        | L-aspartase                                         | asp-L[c] => fum[c] + nh4[c]                            | 0   | BT_2755                         | 0     | 1000 | 2  | Alanine and Aspartate Metabolism           |                                                                                                                          |                                                                                                                                                                                                                            | 4.3.1.1   |
|             | ASPt2r      | L-aspartate reversible transport via proton symport | h[e] + asp-L[e] <=> h[c] + asp-L[c]                    | 1   |                                 | -1000 | 1000 | 2  | Transport, Extracellular                   | Dworkin, M. and S. Falkow (2006). The prokaryotes : a handbook on the biology of bacteria. New York ; [London], Springer | B. thetaiotaomicron is weakly proteolytic, so a transport reaction for all amino acids is assumed.                                                                                                                         |           |

| SEED Rxn ID | BIGG Rxn ID | Function                                | Formula                                                | Rev | GA                                                                                            | LB     | UB   | CS | Subsystem                        | Reference     | Notes                                                                                                            | EC Number |
|-------------|-------------|-----------------------------------------|--------------------------------------------------------|-----|-----------------------------------------------------------------------------------------------|--------|------|----|----------------------------------|---------------|------------------------------------------------------------------------------------------------------------------|-----------|
| rxn00260    | ASPTA       | aspartate transaminase                  | akg[c] + asp-L[c]<br><=> glu-L[c] + oaa[c]             | 1   | (BT_3935 or BT_3720 or BT_3375 or BT_0666 or BT_1077 or BT_1476 or BT_2415)                   | -1000  | 1000 | 2  | Alanine and Aspartate Metabolism |               |                                                                                                                  | 2.6.1.1   |
|             | ATPM        | ATP maintenance requirement             | h2o[c] + atp[c]<br>=> h[c] + pi[c] + adp[c]            | 0   |                                                                                               | 84.300 | 1000 | 0  | Unassigned                       |               | Added based on published reconstructions in BIGG database                                                        |           |
| rxn00789    | ATPPRT      | ATP phosphoribosyltransferase           | atp[c] + prpp[c]<br>=> ppi[c] + prbatp[c]              | 0   | BT_0200                                                                                       | 0      | 1000 | 2  | Histidine Metabolism             |               |                                                                                                                  | 2.4.2.17  |
| rxn10042    | ATPS4       | ATP synthase (four protons for one ATP) | pi[c] + adp[c] + 4 h[e]<br>=> h2o[c] + 3 h[c] + atp[c] | 0   | (BT_0711 and BT_0712 and BT_0714 and BT_0715 and BT_0716 and BT_0717 and BT_0718 and BT_0719) | 0      | 1000 | 2  | Central Metabolism               |               | UniProt: Reviewed, ATPase is confirmed to be made up of the present 8 SUs                                        | 3.6.3.14  |
|             | B_MANNASEe  | beta-mannosidase, extracellular         | h2o[e] + mn[e]<br>=> acgam[e] + man[e]                 | 0   | (BT_0458 or BT_2855 or BT_4074 or BT_2432 or BT_3599)                                         | 0      | 1000 | 4  | N-Glycan Degradation             | PMID:17287210 | BT_0458 gene product was purified and characterized. Shown to have beta-mannosidase activity on human N-glycans. | 3.2.1.25  |
| rxn00792    | BACCL       | biotin-[acetyl-CoA-carboxylase] ligase  | h[c] + atp[c] + btn[c]<br>=> ppi[c] + btamp[c]         | 0   | BT_2238                                                                                       | 0      | 1000 | 2  | Biotin Metabolism                |               |                                                                                                                  | 6.3.4.15  |
| rxn00020    | BGLA        | 1,4-beta-D-Glucan glucohydrolase        | h2o[c] + cellb[c]<br>=> 2 glc-D[c]                     | 0   | (BT_3009 or BT_3300 or BT_3314 or BT_1778)                                                    | 0      | 1000 | 4  | Alternate Carbon Metabolism      | PMID:879772   | Beta-glucosidase activity and cellobiose degradation was shown experimentally in B. thetaiotaomicron.            | 3.2.1.21  |



| SEED Rxn ID | BIGG Rxn ID | Function                                           | Formula                                                                                                                     | Rev | GA                   | LB    | UB   | CS | Subsystem                                  | Reference                   | Notes                                                                                                                                                                                             | EC Number              |
|-------------|-------------|----------------------------------------------------|-----------------------------------------------------------------------------------------------------------------------------|-----|----------------------|-------|------|----|--------------------------------------------|-----------------------------|---------------------------------------------------------------------------------------------------------------------------------------------------------------------------------------------------|------------------------|
| rxn00137    | BPNT        | 3',5'-bisphosphate nucleotidase                    | $\text{h2o}[c] + \text{pap}[c] \Rightarrow \text{pi}[c] + \text{amp}[c]$                                                    | 0   |                      | 0     | 1000 | 1  | Cysteine Metabolism                        |                             | Added by Model SEED during auto-completion step in pipeline.                                                                                                                                      | 3.1.3.7                |
| rxn06673    | BTNPL       | holocarboxylase synthetase (biotin protein ligase) | $\text{btamp}[c] + \text{apoC\_Lys}[c] \Rightarrow \text{h}[c] + \text{amp}[c] + \text{apoC\_Lys\_btn}[c]$                  | 0   | (BT_1450 or BT_1917) | 0     | 1000 | 2  | Biotin Metabolism                          |                             | Not sure about synthesis of apoC_Lys in B. thetaiotaomicron.                                                                                                                                      | 6.4.1.1                |
|             | BTNt2       | Biotin reversible transport via proton symport     | $\text{h}[e] + \text{btn}[e] \rightleftharpoons \text{h}[c] + \text{btn}[c]$                                                | 1   |                      | -1000 | 1000 | 2  | Transport, Extracellular                   | PMID: 19748469              | B. thetaiotaomicron mutants in biotin biosynthesis are not essential in vitro on tryptone-yeast extract-glucose medium, suggesting that B. thetaiotaomicron can uptake biotin from yeast extract. |                        |
| rxn08180    | BTS4        | Biotin synthase                                    | $\text{amet}[c] + \text{dtbt}[c] + \text{s}[c] \Rightarrow \text{h}[c] + \text{dad-5}[c] + \text{btn}[c] + \text{met-L}[c]$ | 0   | BT_1442              | 0     | 1000 | 4  | Cofactor and Prosthetic Group Biosynthesis | PMID:4853401, PMID:20693992 | B. thetaiotaomicron does not require biotin (PMID:4853401). Most likely, biotin is synthesized as described in PMID:20693992.                                                                     | 2.8.1.6                |
| rxn01236    | BUTK        | Butyrate kinase                                    | $\text{atp}[c] + \text{but}[c] \Rightarrow \text{adp}[c] + \text{butpi}[c]$                                                 | 0   | BT_2552              | 0     | 1000 | 2  | Butanoate Metabolism                       |                             | Reversible in SEED                                                                                                                                                                                | 2.7.2.7                |
| rxn10447    | CA2abc      | calcium transport via ABC system                   | $\text{h2o}[c] + \text{atp}[c] + \text{ca2}[e] \Rightarrow \text{h}[c] + \text{pi}[c] + \text{adp}[c] + \text{ca2}[c]$      | 0   | BT_2541              | 0     | 1000 | 3  | Transport, Extracellular                   | PMID:4472783                | B. thetaiotaomicron requires calcium in medium. Gene annotation added manually based on NCBI Gene.                                                                                                |                        |
|             | CARNcNc     | hydrolysis of L-Carnosine for uptake               | $\text{h2o}[c] + \text{carn}[c] \rightleftharpoons \text{his-L}[c] + \text{ala-B}[c]$                                       | 1   | (BT_4045 or BT_1615) | -1000 | 1000 | 2  | Histidine Metabolism                       | PMID:3543210, PMID:12663928 | B. thetaiotaomicron is weakly proteolytic. Has a predicted cytosolic Nalpha-(beta-alanyl)-L-histidine hydrolase.                                                                                  | 3.4.13.20 or 3.4.13.18 |

| SEED Rxn ID | BIGG Rxn ID | Function                                                          | Formula                                                                                 | Rev | GA                                | LB    | UB   | CS | Subsystem                                  | Reference                   | Notes                                                                                                              | EC Number |
|-------------|-------------|-------------------------------------------------------------------|-----------------------------------------------------------------------------------------|-----|-----------------------------------|-------|------|----|--------------------------------------------|-----------------------------|--------------------------------------------------------------------------------------------------------------------|-----------|
|             | CARPEPT1tr  | Reversible transport of L-Carnosine by Di-/tripeptide transporter | h[e] + carn[e]<br><=> h[c] + carn[c]                                                    | 1   | (BT_4385 or BT_0580)              | -1000 | 1000 | 2  | Transport, Extracellular                   | PMID:3543210, PMID:12663928 | B. thetaiotaomicron is weakly proteolytic. Has a predicted cytosolic Nalpa-(beta-alanyl)-L-histidine hydrolase.    |           |
| rxn00006    | CAT         | catalase                                                          | 2 h2o2[c] => 2 h2o[c] + o2[c]                                                           | 0   | BT_1971                           | 0     | 1000 | 4  | ROS Detoxification                         | PMID:9371450                |                                                                                                                    | 1.11.1.6  |
|             | CAt7r       | calcium / sodium antiporter (1:3), reversible                     | 3 na1[e] + ca2[c]<br><=> 3 na1[c] + ca2[e]                                              | 1   | BT_3019                           | -1000 | 1000 | 3  | Transport, Extracellular                   | PMID: 19748469              | BT_2541 KO appears to be viable in vitro, which suggest that another calcium transporter exists.                   |           |
| rxn10147    | CBL1abc     | Cob(1)alamin transport via ABC system                             | h2o[c] + atp[c] + cbl1[e] => h[c] + pi[c] + adp[c] + cbl1[c]                            | 0   | (BT_1799 or BT_1489)              | 0     | 1000 | 4  | Transport, Extracellular                   | PMID:4853401                | B. thetaiotaomicron requires cobalamin (vitamin B12) for growth. Gene annotation is putatively based on NCBI Gene. |           |
| rxn08194    | CBLAT       | cob(I)alamin adenosyltransferase                                  | h[c] + atp[c] + cbl1[c] <=> pppi[c] + adocbl[c]                                         | 1   | BT_2760                           | -1000 | 1000 | 3  | Cofactor and Prosthetic Group Biosynthesis | PMID:148460                 | B. thetaiotaomicron requires Vitamin B12 in medium.                                                                | 2.5.1.17  |
| rxn00414    | CBPS        | carbamoyl-phosphate synthase (glutamine-hydrolysing)              | h2o[c] + 2 atp[c] + hco3[c] + gln-L[c] => 2 h[c] + glu-L[c] + pi[c] + 2 adp[c] + cbp[c] | 0   | (BT_0556 and BT_0557 and BT_3866) | 0     | 1000 | 2  | Purine and Pyrimidine Biosynthesis         |                             |                                                                                                                    | 6.3.5.5   |
|             | CCP         | Cytochrome c peroxidase                                           | 2 h[c] + h2o2[c] + 2 fcytcc553[c] => 2 h2o[c] + 2 fcytcc553[c]                          | 0   | BT_1606                           | 0     | 1000 | 2  | ROS Detoxification                         |                             | Added based on annotation from NCBI Gene.                                                                          | 1.11.1.5  |
| rxn05516    | CD2abc1     | cadmium transport out via ABC system                              | h2o[c] + atp[c] + cd2[c] => h[c] + pi[c] + adp[c] + cd2[e]                              | 0   | BT_1091                           | 0     | 1000 | 2  | Transport, Extracellular                   |                             |                                                                                                                    |           |
| rxn01750    | CDPGHL      | CDPglucose 4,6-hydrolyase                                         | cdpglc[c] => h2o[c] + cdpddg[c]                                                         | 0   | BT_1350                           | 0     | 1000 | 2  | Alternate Carbon Metabolism                |                             | Added based on KEGG Pathway. The product's function and further metabolic fate seems to be unknown.                | 4.2.1.45  |

| SEED Rxn ID | BIGG Rxn ID | Function                                                 | Formula                                                  | Rev | GA      | LB | UB   | CS | Subsystem                                  | Reference                                                                                          | Notes                                                                                                                                                                                                                                                                                                                                                                                                                                                                                                                                                                                                                                                       | EC Number |
|-------------|-------------|----------------------------------------------------------|----------------------------------------------------------|-----|---------|----|------|----|--------------------------------------------|----------------------------------------------------------------------------------------------------|-------------------------------------------------------------------------------------------------------------------------------------------------------------------------------------------------------------------------------------------------------------------------------------------------------------------------------------------------------------------------------------------------------------------------------------------------------------------------------------------------------------------------------------------------------------------------------------------------------------------------------------------------------------|-----------|
| rxn03908    | CDPMEK      | 4-(cytidine 5'-diphospho)-2-C-methyl-D-erythritol kinase | atp[c] + 4c2me[c] => h[c] + adp[c] + 2p4c2me[c]          | 0   | BT_0624 | 0  | 1000 | 2  | Cofactor and Prosthetic Group Biosynthesis |                                                                                                    | Reversible in SEED                                                                                                                                                                                                                                                                                                                                                                                                                                                                                                                                                                                                                                          | 2.7.1.148 |
|             | CEPTC_BT    | choline phosphotransferase                               | cdpchol[c] + cer1_bt[c] => h[c] + cmp[c] + sphmyln_bt[c] | 0   |         | 0  | 1000 | 2  | Sphingolipid Metabolism                    | PMID:6102980, PMID:16887518, PMID:20855611, Anaerobe (2001) 07, 103?112 doi:10.1006/anae.2001.0376 | Bacteroides are well established to produce sphingolipids. Pathway added manually to BIGG database to represent known structural differences between eukaryotic and bacterial sphingolipids. The main sphingolipid types in B. thetaiotaomicron are ceramide-1-phosphoethanolamine and ceramide-1-phosphocholine. The fatty acid is usually branched. In B. thetaiotaomicron, the main FA is iso-branched C17. However, no homolog of human ceramide synthase was found in Bacteroides species. Either Bacteroides have structural homologs of this enzyme, which are not revealed by BLASTP search, or sphingolipids are synthesized by another mechanism. | 2.7.8.3   |

| SEED Rxn ID | BIGG Rxn ID | Function                                                      | Formula                                                | Rev | GA | LB | UB   | CS | Subsystem               | Reference                                                                                          | Notes                                                                                                                                                                                                                                                                                                                                                                                                                                                                                                                                                                                                                                                       | EC Number |
|-------------|-------------|---------------------------------------------------------------|--------------------------------------------------------|-----|----|----|------|----|-------------------------|----------------------------------------------------------------------------------------------------|-------------------------------------------------------------------------------------------------------------------------------------------------------------------------------------------------------------------------------------------------------------------------------------------------------------------------------------------------------------------------------------------------------------------------------------------------------------------------------------------------------------------------------------------------------------------------------------------------------------------------------------------------------------|-----------|
|             | CEPTE_BT    | ethanolamine phosphotransferase (B.thetaiotaomicron specific) | cer1_bt[c] + cdpea[c] => h[c] + cmp[c] + pe_cer1_bt[c] | 0   |    | 0  | 1000 | 2  | Sphingolipid Metabolism | PMID:6102980, PMID:16887518, PMID:20855611, Anaerobe (2001) 07, 103?112 doi:10.1006/anae.2001.0376 | Bacteroides are well established to produce sphingolipids. Pathway added manually to BIGG database to represent known structural differences between eukaryotic and bacterial sphingolipids. The main sphingolipid types in B. thetaiotaomicron are ceramide-1-phosphoethanolamine and ceramide-1-phosphocholine. The fatty acid is usually branched. In B. thetaiotaomicron, the main FA is iso-branched C17. However, no homolog of human ceramide synthase was found in Bacteroides species. Either Bacteroides have structural homologs of this enzyme, which are not revealed by BLASTP search, or sphingolipids are synthesized by another mechanism. | 2.7.8.1   |

| SEED Rxn ID | BIGG Rxn ID | Function                                          | Formula                                             | Rev | GA                              | LB | UB   | CS | Subsystem                | Reference                                                                                          | Notes                                                                                                                                                                                                                                                                                                                                                                                                                                                                                                                                                                                                                                                       | EC Number |
|-------------|-------------|---------------------------------------------------|-----------------------------------------------------|-----|---------------------------------|----|------|----|--------------------------|----------------------------------------------------------------------------------------------------|-------------------------------------------------------------------------------------------------------------------------------------------------------------------------------------------------------------------------------------------------------------------------------------------------------------------------------------------------------------------------------------------------------------------------------------------------------------------------------------------------------------------------------------------------------------------------------------------------------------------------------------------------------------|-----------|
|             | CERS_BT     | Ceramide-1 synthase (B.thetaiotaomicron specific) | sphgn[c] + ihpdcoa[c] => h[c] + coa[c] + cer1_bt[c] | 0   |                                 | 0  | 1000 | 2  | Sphingolipid Metabolism  | PMID:6102980, PMID:16887518, PMID:20855611, Anaerobe (2001) 07, 103?112 doi:10.1006/anae.2001.0376 | Bacteroides are well established to produce sphingolipids. Pathway added manually to BIGG database to represent known structural differences between eukaryotic and bacterial sphingolipids. The main sphingolipid types in B. thetaiotaomicron are ceramide-1-phosphoethanolamine and ceramide-1-phosphocholine. The fatty acid is usually branched. In B. thetaiotaomicron, the main FA is iso-branched C17. However, no homolog of human ceramide synthase was found in Bacteroides species. Either Bacteroides have structural homologs of this enzyme, which are not revealed by BLASTP search, or sphingolipids are synthesized by another mechanism. |           |
|             | CGLYt3_2_   | Cys-Gly transport in via proton symport           | 2 h[e] + cgly[e] => 2 h[c] + cgly[c]                | 0   | (BT_0580 or BT_4385 or BT_1086) | 0  | 1000 | 2  | Transport, Extracellular |                                                                                                    | Genes added based on TransportDB (last consulted 06.06.12).                                                                                                                                                                                                                                                                                                                                                                                                                                                                                                                                                                                                 |           |

| SEED Rxn ID | BIGG Rxn ID | Function                               | Formula                                                 | Rev | GA                   | LB    | UB   | CS | Subsystem                                          | Reference                                                                                          | Notes                                                                                                                                                                                                        | EC Number |
|-------------|-------------|----------------------------------------|---------------------------------------------------------|-----|----------------------|-------|------|----|----------------------------------------------------|----------------------------------------------------------------------------------------------------|--------------------------------------------------------------------------------------------------------------------------------------------------------------------------------------------------------------|-----------|
|             | CHLPCTD     | choline phosphate cytididyltransferase | h[c] + ctp[c] + cholp[c] => ppi[c] + cdpchol[c]         | 0   | BT_1721              | 0     | 1000 | 2  | Sphingolipid Metabolism                            | PMID:6102980, PMID:16887518, PMID:20855611, Anaerobe (2001) 07, 103?112 doi:10.1006/anae.2001.0376 | May also be glucose-1-phosphate-cytidyltransferase (NCBI Gene, last updated 04.03.10). This reaction is needed for sphingolipid synthesis. Sphingolipids are known to be synthesized in B. thetaiotaomicron. |           |
|             | CHOLK       | Choline kinase                         | atp[c] + chol[c] => h[c] + adp[c] + cholp[c]            | 0   |                      | 0     | 1000 | 2  | Sphingolipid Metabolism                            | PMID:6102980, PMID:16887518, PMID:20855611, Anaerobe (2001) 07, 103?112 doi:10.1006/anae.2001.0376 | No gene is known. Added to allow sphingolipid synthesis.                                                                                                                                                     | 2.7.1.32  |
| rxn00756    | CHOLSH      | Choline sulfate sulfohydrolase         | h2o[c] + chols[c] => h[c] + chol[c] + so4[c]            | 0   | (BT_1918 or BT_3349) | 0     | 1000 | 2  | Glycine, Serine, and Threonine Metabolism          |                                                                                                    |                                                                                                                                                                                                              | 3.1.6.6   |
| rxn01256    | CHORM       | chorismate mutase                      | chor[c] => pphn[c]                                      | 0   | BT_3934              | 0     | 1000 | 2  | Tyrosine, Tryptophan, and Phenylalanine Metabolism |                                                                                                    | putative gene annotation                                                                                                                                                                                     | 5.4.99.5  |
| rxn01255    | CHORS       | chorismate synthase                    | 3psme[c] => pi[c] + chor[c]                             | 0   | BT_2084              | 0     | 1000 | 2  | Tyrosine, Tryptophan, and Phenylalanine Metabolism |                                                                                                    |                                                                                                                                                                                                              | 4.2.3.5   |
|             | CITRAMALS   | citramalate synthase                   | h2o[c] + pyr[c] + accoa[c] <=> h[c] + coa[c] + 2mmal[c] | 1   | BT_1858              | -1000 | 1000 | 2  | Valine, Leucine, and Isoleucine Metabolism         |                                                                                                    | One of the enzymes involved in a novel pyruvate pathway for isoleucine biosynthesis that is found in some, mainly archaeal, bacteria (KEGG). It is also annotated in B. thetaiotaomicron's genome.           | 2.3.1.182 |

| SEED Rxn ID | BIGG Rxn ID | Function                                                             | Formula                                | Rev | GA                              | LB    | UB   | CS | Subsystem                            | Reference                                   | Notes                                                                                                                                                                                                                            | EC Number |
|-------------|-------------|----------------------------------------------------------------------|----------------------------------------|-----|---------------------------------|-------|------|----|--------------------------------------|---------------------------------------------|----------------------------------------------------------------------------------------------------------------------------------------------------------------------------------------------------------------------------------|-----------|
|             | CKDNS       | CMP-3-deoxy-D-glycero-D-galactono-ulosonic acid (CMP-KDN) synthetase | ctp[c] + kdn[c]<br>=> ppi[c] + ckdn[c] | 0   | BT_1715                         | 0     | 1000 | 4  | Capsular Polysaccharide Biosynthesis | PMID:18804026                               | B. thetaiotaomicron forms and cytidylates 2-keto-3-deoxy-D-glycero-D-galactono-ulosonic acid (KDN), most likely for inclusion in its capsular polysaccharides.                                                                   |           |
| rxn10335    | CLPNS140    | myristoyl-cardiolipin synthase                                       | 2 pg140[c] <=> glyc[c] + clpn140[c]    | 1   | (BT_2046 or BT_2382 or BT_3978) | -1000 | 1000 | 3  | Glycerophospholipid Metabolism       | PMID: 6102980, PMID: 7440508, PMID: 7204330 | The fatty acid composition of B. thetaiotaomicron was determined experimentally.                                                                                                                                                 | 2.7.8.-   |
| rxn10334    | CLPNS160    | palmitoyl-cardiolipin synthase                                       | 2 pg160[c] <=> glyc[c] + clpn160[c]    | 1   | (BT_2046 or BT_2382 or BT_3978) | -1000 | 1000 | 3  | Glycerophospholipid Metabolism       | PMID: 6102980, PMID: 7440508, PMID: 7204330 | The fatty acid composition of B. thetaiotaomicron was determined experimentally.                                                                                                                                                 | 2.7.8.-   |
| rxn10336    | CLPNS180    | stearoyl-cardiolipin synthase                                        | 2 pg180[c] <=> glyc[c] + clpn180[c]    | 1   | (BT_2046 or BT_2382 or BT_3978) | -1000 | 1000 | 3  | Glycerophospholipid Metabolism       | PMID: 6102980, PMID: 7440508, PMID: 7204330 | The fatty acid composition of B. thetaiotaomicron was determined experimentally.                                                                                                                                                 | 2.7.8.-   |
| rxn10341    | CLPNSAI15   | anteisopentadecanoyl-cardiolipin synthase                            | 2 pgai15[c] <=> glyc[c] + clpnai15[c]  | 1   | (BT_2046 or BT_2382 or BT_3978) | -1000 | 1000 | 3  | Glycerophospholipid Metabolism       | PMID: 6102980, PMID: 7440508, PMID: 7204330 | Added manually to BIGG database based on reaction mechanism proposed by Model SEED. This reaction is involved in fatty acid biosynthesis. B. thetaiotaomicron is well known to synthesize iso- and anteiso-branched fatty acids. | 2.7.8.-   |

| SEED Rxn ID | BIGG Rxn ID | Function                                  | Formula                               | Rev | GA                              | LB    | UB   | CS | Subsystem                      | Reference                                   | Notes                                                                                                                                                                                                                            | EC Number |
|-------------|-------------|-------------------------------------------|---------------------------------------|-----|---------------------------------|-------|------|----|--------------------------------|---------------------------------------------|----------------------------------------------------------------------------------------------------------------------------------------------------------------------------------------------------------------------------------|-----------|
| rxn10338    | CLPNSAI17   | anteisoheptadecanoyl-cardiolipin synthase | 2 pgai17[c] <=> glyc[c] + clpnai17[c] | 1   | (BT_2046 or BT_2382 or BT_3978) | -1000 | 1000 | 3  | Glycerophospholipid Metabolism | PMID: 6102980, PMID: 7440508, PMID: 7204330 | Added manually to BIGG database based on reaction mechanism proposed by Model SEED. This reaction is involved in fatty acid biosynthesis. B. thetaiotaomicron is well known to synthesize iso- and anteiso-branched fatty acids. | 2.7.8.-   |
| rxn10339    | CLPNSI14    | isotetradecanoyl-cardiolipin synthase     | 2 pgi14[c] <=> glyc[c] + clpni14[c]   | 1   | (BT_2046 or BT_2382 or BT_3978) | -1000 | 1000 | 3  | Glycerophospholipid Metabolism | PMID: 6102980, PMID: 7440508, PMID: 7204330 | Added manually to BIGG database based on reaction mechanism proposed by Model SEED. This reaction is involved in fatty acid biosynthesis. B. thetaiotaomicron is well known to synthesize iso- and anteiso-branched fatty acids. | 2.7.8.-   |
| rxn10340    | CLPNSI15    | isopentadecanoyl-cardiolipin synthase     | 2 pgi15[c] <=> glyc[c] + clpni15[c]   | 1   | (BT_2046 or BT_2382 or BT_3978) | -1000 | 1000 | 3  | Glycerophospholipid Metabolism | PMID: 6102980, PMID: 7440508, PMID: 7204330 | Added manually to BIGG database based on reaction mechanism proposed by Model SEED. This reaction is involved in fatty acid biosynthesis. B. thetaiotaomicron is well known to synthesize iso- and anteiso-branched fatty acids. | 2.7.8.-   |

| SEED Rxn ID | BIGG Rxn ID | Function                                                    | Formula                                                          | Rev | GA                                                                    | LB    | UB   | CS | Subsystem                            | Reference                                   | Notes                                                                                                                                                                                                                            | EC Number |
|-------------|-------------|-------------------------------------------------------------|------------------------------------------------------------------|-----|-----------------------------------------------------------------------|-------|------|----|--------------------------------------|---------------------------------------------|----------------------------------------------------------------------------------------------------------------------------------------------------------------------------------------------------------------------------------|-----------|
| rxn10342    | CLPNSII6    | isoheptadecanoyl-cardiolipin synthase                       | 2 pgil6[c] <=> glyc[c] + clpni16[c]                              | 1   | (BT_2046 or BT_2382 or BT_3978)                                       | -1000 | 1000 | 3  | Glycerophospholipid Metabolism       | PMID: 6102980, PMID: 7440508, PMID: 7204330 | Added manually to BIGG database based on reaction mechanism proposed by Model SEED. This reaction is involved in fatty acid biosynthesis. B. thetaiotaomicron is well known to synthesize iso- and anteiso-branched fatty acids. | 2.7.8.-   |
| rxn10337    | CLPNSII7    | isoheptadecanoyl-cardiolipin synthase                       | 2 pgil7[c] <=> glyc[c] + clpni17[c]                              | 1   | (BT_2046 or BT_2382 or BT_3978)                                       | -1000 | 1000 | 3  | Glycerophospholipid Metabolism       | PMID: 6102980, PMID: 7440508, PMID: 7204330 | Added manually to BIGG database based on reaction mechanism proposed by Model SEED. This reaction is involved in fatty acid biosynthesis. B. thetaiotaomicron is well known to synthesize iso- and anteiso-branched fatty acids. | 2.7.8.-   |
| rxn10473    | Clt         | chlorideion transport out via diffusion                     | cl[e] <=> cl[c]                                                  | 1   | BT_3944                                                               | -1000 | 1000 | 2  | Transport, Extracellular             |                                             | Putative annotation (NCBI)                                                                                                                                                                                                       |           |
| rxn02483    | CMLDC       | 4-carboxymuconolactone decarboxylase                        | 2c25dho[c] => h[c] + co2[c] + 5odhf2a[c]                         | 0   | BT_1393                                                               | 0     | 1000 | 2  | Benzoate Degradation                 |                                             |                                                                                                                                                                                                                                  | 4.1.1.44  |
| rxn05467    | CO2t        | CO2 transporter via diffusion                               | co2[e] <=> co2[c]                                                | 1   |                                                                       | -1000 | 1000 | 1  | Transport, Extracellular             |                                             |                                                                                                                                                                                                                                  |           |
| rxn10474    | COBALTt5    | cobalt transport in/out via permease (no H+)                | cobalt2[c] <=> cobalt2[e]                                        | 1   | BT_4679                                                               | -1000 | 1000 | 2  | Transport, Extracellular             |                                             | Irreversible in SEED                                                                                                                                                                                                             |           |
|             | CPS_BT_ABC  | Capsule polysaccharide (B.thetaiotaomicron specific) export | h2o[c] + atp[c] + cps_bt[c] => h[c] + pi[c] + adp[c] + cps_bt[e] | 0   | (BT_0057 and BT_0398 and BT_0481 and BT_0613 and BT_1356 and BT_2863) | 0     | 1000 | 4  | Capsular Polysaccharide Biosynthesis | PMID:17579514                               | Not sure if ABC transporter is correct. See comments for reaction CPSS_BT for more details on B. thetaiotaomicron CPS. Genes taken from Table S5 in PMID:17579514.                                                               |           |

| SEED Rxn ID | BIGG Rxn ID | Function                                                         | Formula                                                                | Rev | GA                                                                                                                                                                                | LB | UB   | CS | Subsystem                            | Reference                                                                               | Notes                                                                                                                                                                                                                                                                                                                                                                                                                                                                                                                                                                                                                                                                                                                                                                | EC Number |
|-------------|-------------|------------------------------------------------------------------|------------------------------------------------------------------------|-----|-----------------------------------------------------------------------------------------------------------------------------------------------------------------------------------|----|------|----|--------------------------------------|-----------------------------------------------------------------------------------------|----------------------------------------------------------------------------------------------------------------------------------------------------------------------------------------------------------------------------------------------------------------------------------------------------------------------------------------------------------------------------------------------------------------------------------------------------------------------------------------------------------------------------------------------------------------------------------------------------------------------------------------------------------------------------------------------------------------------------------------------------------------------|-----------|
|             | CPSS_BT     | Capsular polysaccharide synthesis (B. thetaiotaomicron specific) | 2ameph[c] + ckdn[c] + gdpfuc[c] + dtdprmn[c] + uacmamu[c] => cps_bt[c] | 0   | (BT_0033 and BT_0378 and BT_0381 and BT_0382 and BT_0391 and BT_0394 and BT_0598 and BT_1343 and BT_1346 and BT_1355 and BT_1644 and BT_1653 and BT_1708 and BT_1722 and BT_2872) | 0  | 1000 | 4  | Capsular Polysaccharide Biosynthesis | PMID:12904299, PMID:18804026, PMID:15774760, PMID:17579514, PMID:18263721 PMID:19403529 | Putative reaction and product formula, no information about exact reaction stoichiometry and structure of B. thetaiotaomicron CPS found. B. thetaiotaomicron most likely synthesizes 2-aminoethylphosphonate (PMID:12904299) and CMP-KDN (PMID:18804026) for inclusion into CPS. Annotation is based on Table S5 in PMID:17579514. Boolean rules may be incorrect. There are eight CPS biosynthesis loci in the B. thetaiotaomicron genome. dTDP-L-rhamnose is also generally involved in capsule polysaccharide synthesis. The capsules of gram-negative bacteria also include N-acetylmannosaminurate (ManNAcA) (PMID:18263721). Bacteroides also incorporate GDP-fucose synthesized from host-derived fucose into their capsular polysaccharides (PMID:15774760). |           |

| SEED Rxn ID | BIGG Rxn ID | Function            | Formula                                                             | Rev | GA                                                                                                                         | LB | UB   | CS | Subsystem                     | Reference     | Notes                                                        | EC Number |
|-------------|-------------|---------------------|---------------------------------------------------------------------|-----|----------------------------------------------------------------------------------------------------------------------------|----|------|----|-------------------------------|---------------|--------------------------------------------------------------|-----------|
| rxn00256    | CS          | citrate synthase    | h2o[c] + accoa[c]<br>+ oaa[c] => h[c]<br>+ coa[c] + cit[c]          | 0   | BT_2070                                                                                                                    | 0  | 1000 | 2  | TCA Cycle                     |               |                                                              | 2.3.3.1   |
|             | CS4TASE     | chondro-4-sulfatase | h2o[e] +<br>cspg_a_degr[e]<br>=> h[e] + so4[e]<br>+ acgalglcur[e]   | 0   | ((BT_0238<br>and BT_3095)<br>or (BT_0238<br>and BT_3051)<br>or (BT_0238<br>and<br>BT_3177))                                | 0  | 1000 | 4  | Glycosaminoglycan Degradation | PMID:21507958 | BT_0238 encodes anSME (anaerobic Sulfatase-Maturing Enzyme). | 3.1.6.9   |
|             | CS4TASE2    | chondro-4-sulfatase | h2o[e] +<br>cspg_b_degr[e]<br>=> h[e] + so4[e]<br>+ acgalidour2s[e] | 0   | ((BT_0238<br>and BT_3095)<br>or (BT_0238<br>and BT_3051)<br>or (BT_0238<br>and<br>BT_3177))                                | 0  | 1000 | 4  | Glycosaminoglycan Degradation | PMID:21507958 | BT_0238 encodes anSME (anaerobic Sulfatase-Maturing Enzyme). | 3.1.6.9   |
|             | CS6TASE     | chondro-6-sulfatase | h2o[e] +<br>cspg_c_degr[e]<br>=> h[e] + so4[e]<br>+ acgalglcur[e]   | 0   | ((BT_0238<br>and BT_1622)<br>or (BT_3057<br>and BT_0238)<br>or (BT_4656<br>and BT_0238)<br>or (BT_3486<br>and<br>BT_0238)) | 0  | 1000 | 4  | Glycosaminoglycan Degradation | PMID:21507958 | BT_0238 encodes anSME (anaerobic Sulfatase-Maturing Enzyme). | 3.1.6.4   |

| SEED Rxn ID | BIGG Rxn ID  | Function                            | Formula                                                                                                                                      | Rev | GA                                | LB | UB   | CS | Subsystem                     | Reference                                                               | Notes                                                                                                                                                                                                                                                                                                                                                                                                                                                                        | EC Number |
|-------------|--------------|-------------------------------------|----------------------------------------------------------------------------------------------------------------------------------------------|-----|-----------------------------------|----|------|----|-------------------------------|-------------------------------------------------------------------------|------------------------------------------------------------------------------------------------------------------------------------------------------------------------------------------------------------------------------------------------------------------------------------------------------------------------------------------------------------------------------------------------------------------------------------------------------------------------------|-----------|
|             | CSABCASE_A_e | Chondroitin sulfate lyase ABC, CS_A | $2 \text{ h}_2\text{o}[\text{e}] + \text{cspg\_a}[\text{e}] \Rightarrow 2 \text{ cspg\_a\_degr}[\text{e}] + \text{cspg\_ab\_rest}[\text{e}]$ | 0   | (BT_3331 and BT_3332 and BT_3348) | 0  | 1000 | 4  | Glycosaminoglycan Degradation | PMID:6782076, PMID:7574611, PMID:18512954, PMID:18992215, PMID:18996345 | <p>B. thetaiotaomicron ferments chondroitin sulfate. The polysaccharide utilization locus (PUL) BT3324 - BT3350 is upregulated in its presence. BT_3348 degrades chondroitin sulfate to oligosaccharides, which requires BT_3331 (sus C homolog) and BT_3332 (csuF). BT_3324 and BT_3350 degrade the desulfated oligosaccharides to monosaccharides. Based on Figure 3, PMID:18996345. It is assumed that the proteoglycan rest is undegradable for B. thetaiotaomicron.</p> | 4.2.2.20  |

| SEED Rxn ID | BIGG Rxn ID  | Function                            | Formula                                                                                                                                                                                            | Rev | GA                                | LB | UB   | CS | Subsystem                     | Reference                                                               | Notes                                                                                                                                                                                                                                                                                                                                                                                                                                                                        | EC Number |
|-------------|--------------|-------------------------------------|----------------------------------------------------------------------------------------------------------------------------------------------------------------------------------------------------|-----|-----------------------------------|----|------|----|-------------------------------|-------------------------------------------------------------------------|------------------------------------------------------------------------------------------------------------------------------------------------------------------------------------------------------------------------------------------------------------------------------------------------------------------------------------------------------------------------------------------------------------------------------------------------------------------------------|-----------|
|             | CSABCASE_B_e | Chondroitin sulfate lyase ABC, CS_B | $2 \text{ h}_2\text{o}[\text{e}] + \text{cspg}_\text{b}[\text{e}] \Rightarrow \text{cspg}_\text{a\_degr}[\text{e}] + \text{cspg}_\text{b\_degr}[\text{e}] + \text{cspg}_\text{ab\_rest}[\text{e}]$ | 0   | (BT_3331 and BT_3332 and BT_3348) | 0  | 1000 | 4  | Glycosaminoglycan Degradation | PMID:6782076, PMID:7574611, PMID:18512954, PMID:18992215, PMID:18996345 | <p>B. thetaiotaomicron ferments chondroitin sulfate. The polysaccharide utilization locus (PUL) BT3324 - BT3350 is upregulated in its presence. BT_3348 degrades chondroitin sulfate to oligosaccharides, which requires BT_3331 (sus C homolog) and BT_3332 (csuF). BT_3324 and BT_3350 degrade the desulfated oligosaccharides to monosaccharides. Based on Figure 3, PMID:18996345. It is assumed that the proteoglycan rest is undegradable for B. thetaiotaomicron.</p> | 4.2.2.20  |

| SEED Rxn ID | BIGG Rxn ID  | Function                                | Formula                                                       | Rev | GA                                | LB    | UB   | CS | Subsystem                              | Reference                                                               | Notes                                                                                                                                                                                                                                                                                                                                                                                                                                                                 | EC Number |
|-------------|--------------|-----------------------------------------|---------------------------------------------------------------|-----|-----------------------------------|-------|------|----|----------------------------------------|-------------------------------------------------------------------------|-----------------------------------------------------------------------------------------------------------------------------------------------------------------------------------------------------------------------------------------------------------------------------------------------------------------------------------------------------------------------------------------------------------------------------------------------------------------------|-----------|
|             | CSABCASE_C_e | Chondroitin sulfate lyase ABC, CS_C     | 2 h2o[e] + cspg_c[e] => 2 cspg_c_degr[e] + cspg_c_rest[e]     | 0   | (BT_3331 and BT_3332 and BT_3348) | 0     | 1000 | 4  | Glycosaminoglycan Degradation          | PMID:6782076, PMID:7574611, PMID:18512954, PMID:18992215, PMID:18996345 | B. thetaiotaomicron ferments chondroitin sulfate. The polysaccharide utilization locus (PUL) BT3324 - BT3350 is upregulated in its presence. BT_3348 degrades chondroitin sulfate to oligosaccharides, which requires BT_3331 (sus C homolog) and BT_3332 (csuF). BT_3324 and BT_3350 degrade the desulfated oligosaccharides to monosaccharides. Based on Figure 3, PMID:18996345. It is assumed that the proteoglycan rest is undegradable for B. thetaiotaomicron. | 4.2.2.20  |
|             | CSPMDDC      | carboxyspermidine decarboxylase         | 2 h[c] + cspmd[c] => co2[c] + spmd[c]                         | 0   | BT_0674                           | 0     | 1000 | 3  | Spermidine and Putrescine Biosynthesis | PMID:10801923                                                           | Annotation from NCBI Gene, last updated 02.04.11                                                                                                                                                                                                                                                                                                                                                                                                                      | 4.1.1.-   |
|             | CSPMDDH      | carboxyspermidine:NA DP+ oxidoreductase | nadph[c] + aspsa[c] + ptrc[c] <=> h2o[c] + nadp[c] + cspmd[c] | 1   |                                   | -1000 | 1000 | 2  | Spermidine and Putrescine Biosynthesis | PMID:10801923                                                           | Added to allow B. thetaiotaomicron to secrete putrescine (shown in vivo). Annotated for Bacteroides helcogenes (Bache_1714).                                                                                                                                                                                                                                                                                                                                          | 4.1.1.-   |
| rxn05192    | CTBTabc      | Crotono-betaine ABC transport           | h2o[c] + atp[c] + ctbt[e] => h[c] + pi[c] + adp[c] + ctbt[c]  | 0   | (BT_1749 and BT_1750 and BT_1751) | 0     | 1000 | 2  | Transport, Extracellular               |                                                                         |                                                                                                                                                                                                                                                                                                                                                                                                                                                                       |           |
| rxn00410    | CTPS1        | CTP synthase (NH3)                      | atp[c] + nh4[c] + utp[c] => 2 h[c] + pi[c] + adp[c] + ctp[c]  | 0   | BT_0590                           | 0     | 1000 | 2  | Purine and Pyrimidine Biosynthesis     |                                                                         | Reversible in SEED                                                                                                                                                                                                                                                                                                                                                                                                                                                    | 6.3.4.2   |

| SEED Rxn ID | BIGG Rxn ID | Function                                           | Formula                                                                            | Rev | GA                   | LB    | UB   | CS | Subsystem                          | Reference    | Notes                                                                | EC Number |
|-------------|-------------|----------------------------------------------------|------------------------------------------------------------------------------------|-----|----------------------|-------|------|----|------------------------------------|--------------|----------------------------------------------------------------------|-----------|
| rxn00412    | CTPS2       | CTP synthase (glutamine)                           | h2o[c] + atp[c] + gln-L[c] + utp[c] => 2 h[c] + glu-L[c] + pi[c] + adp[c] + ctp[c] | 0   | BT_0590              | 0     | 1000 | 2  | Purine and Pyrimidine Biosynthesis |              |                                                                      | 6.3.4.2   |
| rxn10481    | Cuabc       | Copper transport via ABC system                    | h2o[c] + atp[c] + cu2[e] => h[c] + pi[c] + adp[c] + cu2[c]                         | 0   | BT_1091              | 0     | 1000 | 2  | Transport, Extracellular           |              |                                                                      |           |
| rxn05528    | Cut1        | Copper export via ATPase                           | h2o[c] + atp[c] + cu2[c] => h[c] + pi[c] + adp[c] + cu2[e]                         | 0   | BT_1091              | 0     | 1000 | 2  | Transport, Extracellular           |              |                                                                      |           |
|             | CYSDS       | Cysteine Desulphydrase                             | h2o[c] + cys-L[c] => pyr[c] + nh4[c] + h2s[c]                                      | 0   | (BT_1923 or BT_2387) | 0     | 1000 | 2  | Cysteine Metabolism                | PMID:4853401 | Added to allow B. thetaiotaomicron to use cysteine as sulfur source. | 4.1.99.1  |
| rxn00649    | CYSS        | cysteine synthase                                  | h2s[c] + acser[c] => h[c] + ac[c] + cys-L[c]                                       | 0   | (BT_1852 or BT_3080) | 0     | 1000 | 3  | Cysteine Metabolism                | PMID:4853401 | Cysteine can be synthesized de novo and serve as sulfur source.      | 2.5.1.47  |
| rxn05733    | CYSS3r      | cysteine synthase (Thiosulfate)                    | trdrd[c] + tsul[c] + acser[c] <=> h[c] + ac[c] + trdox[c] + so3[c] + cys-L[c]      | 1   | (BT_1852 or BT_3080) | -1000 | 1000 | 2  | Cysteine Metabolism                |              | Added manually to BIGG database based on SEED database               | 2.5.1.47  |
|             | CYSt2r      | L-cysteine reversible transport via proton symport | h[e] + cys-L[e] <=> h[c] + cys-L[c]                                                | 1   |                      | -1000 | 1000 | 2  | Transport, Extracellular           | PMID:4853401 | Cysteine is required as sulfur source if sulfide is not available.   |           |

| SEED Rxn ID | BIGG Rxn ID | Function                                        | Formula                                                                                                                     | Rev | GA                                 | LB | UB   | CS | Subsystem          | Reference                   | Notes                                                                                                                                                                                                                                                                                                                                                                            | EC Number |
|-------------|-------------|-------------------------------------------------|-----------------------------------------------------------------------------------------------------------------------------|-----|------------------------------------|----|------|----|--------------------|-----------------------------|----------------------------------------------------------------------------------------------------------------------------------------------------------------------------------------------------------------------------------------------------------------------------------------------------------------------------------------------------------------------------------|-----------|
| rxn10113    | CYTBD       | cytochrome oxidase bd (ubiquinol-8: 2 protons)  | $2 \text{ h[c]} + 0.5 \text{ o2[c]} + 8 \text{ h2o[c]} + 2 \text{ h[e]} + 8 \text{ q8[c]}$ $\Rightarrow$                    | 0   | (BT_3053 or (BT_1209 and BT_1210)) | 0  | 1000 | 4  | Central Metabolism | PMID: 1474983, PMID: 893348 | B. fragilis, and most likely B. thetaiotaomicron, is stimulated by nanomolar concentrations of oxygen due to cytochrome bd oxidase activity (PMID:14749831). It is unclear whether B. thetaiotaomicron uses ubiquinone, menaquinone or both. PMID: 893348 states that only menaquinone is present, however ubiquinone-using enzymes are annotated in B. thetaiotaomicron genome. | 1.10.3.-  |
| rxn10806    | CYTBD2      | cytochrome oxidase bd (menaquinol-8: 2 protons) | $2 \text{ h[c]} + \text{mq18[c]} + 0.5 \text{ o2[c]} + 8 \text{ h2o[c]} + 2 \text{ h[e]} + 8 \text{ mqn8[c]}$ $\Rightarrow$ | 0   | (BT_3053 or (BT_1209 and BT_1210)) | 0  | 1000 | 4  | Central Metabolism | PMID:14749831, PMID: 893348 | B. fragilis, and most likely B. thetaiotaomicron, is stimulated by nanomolar concentrations of oxygen due to cytochrome bd oxidase activity (PMID:14749831). It is unclear whether B. thetaiotaomicron uses ubiquinone, menaquinone or both. PMID: 893348 states that only menaquinone is present, however ubiquinone-using enzymes are annotated in B. thetaiotaomicron genome. | 1.10.3.-  |

| SEED Rxn ID | BIGG Rxn ID | Function                                                  | Formula                                          | Rev | GA                   | LB    | UB   | CS | Subsystem                  | Reference                                              | Notes                                                                                                                                                                             | EC Number |
|-------------|-------------|-----------------------------------------------------------|--------------------------------------------------|-----|----------------------|-------|------|----|----------------------------|--------------------------------------------------------|-----------------------------------------------------------------------------------------------------------------------------------------------------------------------------------|-----------|
| rxn01368    | CYTD        | cytidine deaminase                                        | h2o[c] + h[c] + cytd[c] => nh4[c] + uri[c]       | 0   | BT_1539              | 0     | 1000 | 2  | Nucleotide Salvage Pathway |                                                        | SEED rxn utilizes 2.5 h                                                                                                                                                           | 3.5.4.5   |
| rxn00365    | CYTDK1      | ATPcytidine 5-phosphotransferase                          | atp[c] + cytd[c] => h[c] + adp[c] + cmp[c]       | 0   | (BT_0184 or BT_2527) | 0     | 1000 | 2  | Nucleotide Salvage Pathway |                                                        |                                                                                                                                                                                   | 2.7.1.48  |
| rxn00369    | CYTDK2      | cytidine kinase (GTP)                                     | gtp[c] + cytd[c] => h[c] + gdp[c] + cmp[c]       | 0   | (BT_0184 or BT_2527) | 0     | 1000 | 2  | Nucleotide Salvage Pathway |                                                        | Reversible in SEED                                                                                                                                                                | 2.7.1.48  |
| rxn00707    | CYTDK3      | ITPcytidine 5-phosphotransferase                          | cytd[c] + itp[c] => h[c] + cmp[c] + idp[c]       | 0   | (BT_2060 or BT_2093) | 0     | 1000 | 2  | Nucleotide Salvage Pathway |                                                        | Reversible in SEED                                                                                                                                                                | 2.7.4.14  |
| rxn00368    | CYTDK4      | UTPcytidine 5-phosphotransferase                          | utp[c] + cytd[c] => h[c] + cmp[c] + udp[c]       | 0   | (BT_0184 or BT_2527) | 0     | 1000 | 2  | Nucleotide Salvage Pathway |                                                        |                                                                                                                                                                                   | 2.7.1.48  |
| rxn05198    | CYTDt2r     | cytidine transport in via proton symport, reversible      | h[e] + cytd[e] <=> h[c] + cytd[c]                | 1   | BT_4330              | -1000 | 1000 | 2  | Transport, Extracellular   |                                                        |                                                                                                                                                                                   |           |
| rxn00364    | CYTK1       | cytidylate kinase (CMP)                                   | atp[c] + cmp[c] <=> adp[c] + cdp[c]              | 1   | (BT_2060 or BT_2093) | -1000 | 1000 | 2  | Nucleotide Salvage Pathway |                                                        |                                                                                                                                                                                   | 2.7.4.14  |
| rxn01219    | CYTK2       | cytidylate kinase (dCMP)                                  | atp[c] + dcmp[c] <=> adp[c] + dcdp[c]            | 1   | (BT_2060 or BT_2093) | -1000 | 1000 | 2  | Nucleotide Salvage Pathway |                                                        |                                                                                                                                                                                   | 2.7.4.14  |
|             | D_LACt2     | D-lactate transport via proton symport                    | h[e] + lac-D[e] <=> h[c] + lac-D[c]              | 1   |                      | -1000 | 1000 | 2  | Transport, Extracellular   | PMID:438119, PMID:148460, PMID:12740060, PMID:11260473 | Bacteroides produce lactate under certain circumstances.                                                                                                                          |           |
| rxn01127    | DADK        | deoxyadenylate kinase                                     | atp[c] + damp[c] <=> adp[c] + dadp[c]            | 1   | BT_4387              | -1000 | 1000 | 2  | Nucleotide Salvage Pathway |                                                        |                                                                                                                                                                                   | 2.7.4.11  |
| rxn05317    | DADNt2r     | deoxyadenosine transport in via proton symport reversible | h[e] + dad-2[e] <=> h[c] + dad-2[c]              | 1   | BT_4330              | -1000 | 1000 | 2  | Transport, Extracellular   |                                                        |                                                                                                                                                                                   |           |
| rxn08297    | DAGK160     | diacylglycerol kinase (n-C16:0)                           | atp[c] + 12dgr160[c] => h[c] + adp[c] + pa160[c] | 0   |                      | 0     | 1000 | 2  | Sphingolipid Metabolism    |                                                        | Not sure if this enzyme is present. It is annotated for most Bacteroides species except B. thetaiotaomicron. Needed for degradation of diacylglycerol and sphingolipid synthesis. |           |

| SEED Rxn ID | BIGG Rxn ID | Function                                | Formula                                                                  | Rev | GA                   | LB    | UB   | CS | Subsystem                       | Reference                                   | Notes                                                                                                                                                                                         | EC Number |
|-------------|-------------|-----------------------------------------|--------------------------------------------------------------------------|-----|----------------------|-------|------|----|---------------------------------|---------------------------------------------|-----------------------------------------------------------------------------------------------------------------------------------------------------------------------------------------------|-----------|
|             | DALAt2r     | D-alanine transport via proton symport  | h[e] + ala-D[e]<br><=> h[c] + ala-D[c]                                   | 1   |                      | -1000 | 1000 | 2  | Transport, Extracellular        | PMID:12663928                               | Added by Model SEED during auto-completion. No gene annotation for ala-D transport available, but B. thetaiotaomicron is believed to possess a non-cytosolic D-alanine-D-alanine dipeptidase. |           |
| rxn00313    | DAPDC       | diaminopimelate decarboxylase           | h[c] + 26dap-M[c] => co2[c] + lys-L[c]                                   | 0   | BT_1374              | 0     | 1000 | 2  | Threonine and Lysine Metabolism |                                             |                                                                                                                                                                                               | 4.1.1.20  |
| rxn01974    | DAPE        | diaminopimelate epimerase               | 26dap-LL[c]<br><=> 26dap-M[c]                                            | 1   | BT_0548              | -1000 | 1000 | 2  | Threonine and Lysine Metabolism |                                             |                                                                                                                                                                                               | 5.1.1.7   |
| rxn01991    | DAPMDH      | Meso-diaminopimelate D-dehydrogenase    | h2o[c] + nadp[c] + 26dap-M[c]<br><=> h[c] + nadph[c] + nh4[c] + l2a6o[c] | 1   | BT_1979              | -1000 | 1000 | 2  | Folate Metabolism               |                                             |                                                                                                                                                                                               | 1.4.1.16  |
| rxn08306    | DASYN120    | CDP-diacylglycerol synthetase (n-C12:0) | h[c] + pa120[c] + ctp[c] => ppi[c] + cdpdddecg[c]                        | 0   | (BT_4006 or BT_4463) | 0     | 1000 | 3  | Glycerophospholipid Metabolism  | PMID: 6102980, PMID: 7440508, PMID: 7204330 | Reversible in reaction in Model SEED. The fatty acid composition of B. thetaiotaomicron was determined experimentally.                                                                        | 2.7.7.41  |
| rxn08307    | DASYN140    | CDP-diacylglycerol synthetase (n-C14:0) | h[c] + pa140[c] + ctp[c] => ppi[c] + cdpdtdecg[c]                        | 0   | (BT_4006 or BT_4463) | 0     | 1000 | 3  | Glycerophospholipid Metabolism  | PMID: 6102980, PMID: 7440508, PMID: 7204330 | Reversible in reaction in Model SEED. The fatty acid composition of B. thetaiotaomicron was determined experimentally.                                                                        | 2.7.7.41  |
| rxn08309    | DASYN160    | CDP-diacylglycerol synthetase (n-C16:0) | h[c] + pa160[c] + ctp[c] => ppi[c] + cdpdhdecg[c]                        | 0   | (BT_4006 or BT_4463) | 0     | 1000 | 3  | Glycerophospholipid Metabolism  | PMID: 6102980, PMID: 7440508, PMID: 7204330 | Reversible in reaction in Model SEED. The fatty acid composition of B. thetaiotaomicron was determined experimentally.                                                                        | 2.7.7.41  |

| SEED Rxn ID | BIGG Rxn ID | Function                                              | Formula                                               | Rev | GA                   | LB | UB   | CS | Subsystem                      | Reference                                   | Notes                                                                                                                                                                                                                            | EC Number |
|-------------|-------------|-------------------------------------------------------|-------------------------------------------------------|-----|----------------------|----|------|----|--------------------------------|---------------------------------------------|----------------------------------------------------------------------------------------------------------------------------------------------------------------------------------------------------------------------------------|-----------|
| rxn08311    | DASYN180    | CDP-diacylglycerol synthetase (n-C18:0)               | h[c] + pa180[c] + ctp[c] => ppi[c] + cdpdodecg[c]     | 0   | (BT_4006 or BT_4463) | 0  | 1000 | 3  | Glycerophospholipid Metabolism | PMID: 6102980, PMID: 7440508, PMID: 7204330 | Reversible in reaction in Model SEED. The fatty acid composition of B. thetaiotaomicron was determined experimentally.                                                                                                           | 2.7.7.41  |
| rxn08312    | DASYN181    | CDP-diacylglycerol synthetase (n-C18:1)               | h[c] + pa181[c] + ctp[c] => ppi[c] + cdpdodec1leg[c]  | 0   | (BT_4006 or BT_4463) | 0  | 1000 | 3  | Glycerophospholipid Metabolism | PMID: 6102980, PMID: 7440508, PMID: 7204330 | Reversible in reaction in Model SEED. The fatty acid composition of B. thetaiotaomicron was determined experimentally.                                                                                                           | 2.7.7.41  |
| rxn10224    | DASYN115    | anteisopentadecanoyl-phosphatidate cytidyltransferase | h[c] + paai15[c] + ctp[c] => ppi[c] + cdpdaipdecg[c]  | 0   | (BT_4006 or BT_4463) | 0  | 1000 | 3  | Glycerophospholipid Metabolism | PMID: 6102980, PMID: 7440508, PMID: 7204330 | Added manually to BIGG database based on reaction mechanism proposed by Model SEED. This reaction is involved in fatty acid biosynthesis. B. thetaiotaomicron is well known to synthesize iso- and anteiso-branched fatty acids. | 2.7.7.41  |
| rxn10221    | DASYN117    | anteisoheptadecanoyl-phosphatidate cytidyltransferase | h[c] + paai17[c] + ctp[c] => ppi[c] + cdpdaihpdecg[c] | 0   | (BT_4006 or BT_4463) | 0  | 1000 | 3  | Glycerophospholipid Metabolism | PMID: 6102980, PMID: 7440508, PMID: 7204330 | Added manually to BIGG database based on reaction mechanism proposed by Model SEED. This reaction is involved in fatty acid biosynthesis. B. thetaiotaomicron is well known to synthesize iso- and anteiso-branched fatty acids. | 2.7.7.41  |

| SEED Rxn ID | BIGG Rxn ID | Function                                          | Formula                                            | Rev | GA                   | LB | UB   | CS | Subsystem                      | Reference                                   | Notes                                                                                                                                                                                                                            | EC Number |
|-------------|-------------|---------------------------------------------------|----------------------------------------------------|-----|----------------------|----|------|----|--------------------------------|---------------------------------------------|----------------------------------------------------------------------------------------------------------------------------------------------------------------------------------------------------------------------------------|-----------|
| rxn10222    | DASYNI14    | isotetradecanoyl-phosphatidate cytidyltransferase | h[c] + pai14[c] + ctp[c] => ppi[c] + cdpditdecg[c] | 0   | (BT_4006 or BT_4463) | 0  | 1000 | 3  | Glycerophospholipid Metabolism | PMID: 6102980, PMID: 7440508, PMID: 7204330 | Added manually to BIGG database based on reaction mechanism proposed by Model SEED. This reaction is involved in fatty acid biosynthesis. B. thetaiotaomicron is well known to synthesize iso- and anteiso-branched fatty acids. | 2.7.7.41  |
| rxn10223    | DASYNI15    | isopentadecanoyl-phosphatidate cytidyltransferase | h[c] + pai15[c] + ctp[c] => ppi[c] + cdpdipdecg[c] | 0   | (BT_4006 or BT_4463) | 0  | 1000 | 3  | Glycerophospholipid Metabolism | PMID: 6102980, PMID: 7440508, PMID: 7204330 | Added manually to BIGG database based on reaction mechanism proposed by Model SEED. This reaction is involved in fatty acid biosynthesis. B. thetaiotaomicron is well known to synthesize iso- and anteiso-branched fatty acids. | 2.7.7.41  |
| rxn10225    | DASYNI16    | isohexadecanoyl-phosphatidate cytidyltransferase  | h[c] + pai16[c] + ctp[c] => ppi[c] + cdpdihdecg[c] | 0   | (BT_4006 or BT_4463) | 0  | 1000 | 3  | Glycerophospholipid Metabolism | PMID: 6102980, PMID: 7440508, PMID: 7204330 | Added manually to BIGG database based on reaction mechanism proposed by Model SEED. This reaction is involved in fatty acid biosynthesis. B. thetaiotaomicron is well known to synthesize iso- and anteiso-branched fatty acids. | 2.7.7.41  |

| SEED Rxn ID | BIGG Rxn ID | Function                                                 | Formula                                                        | Rev | GA                   | LB    | UB   | CS | Subsystem                                          | Reference                                   | Notes                                                                                                                                                                                                                            | EC Number |
|-------------|-------------|----------------------------------------------------------|----------------------------------------------------------------|-----|----------------------|-------|------|----|----------------------------------------------------|---------------------------------------------|----------------------------------------------------------------------------------------------------------------------------------------------------------------------------------------------------------------------------------|-----------|
| rxn10220    | DASYN17     | isoheptadecanoyl-phosphatidate cytidyltransferase        | h[c] + pai17[c] + ctp[c] => ppi[c] + cdpdihpdecg[c]            | 0   | (BT_4006 or BT_4463) | 0     | 1000 | 3  | Glycerophospholipid Metabolism                     | PMID: 6102980, PMID: 7440508, PMID: 7204330 | Added manually to BIGG database based on reaction mechanism proposed by Model SEED. This reaction is involved in fatty acid biosynthesis. B. thetaiotaomicron is well known to synthesize iso- and anteiso-branched fatty acids. | 2.7.7.41  |
| rxn05040    | DB4PS       | 3,4-Dihydroxy-2-butanone-4-phosphate synthase            | ru5p-D[c] => h[c] + db4p[c] + for[c]                           | 0   | BT_2416              | 0     | 1000 | 2  | Cofactor and Prosthetic Group Biosynthesis         |                                             |                                                                                                                                                                                                                                  | 4.1.99.12 |
| rxn02277    | DBTS        | dethiobiotin synthase                                    | co2[c] + atp[c] + dann[c] => 3 h[c] + pi[c] + adp[c] + dtbt[c] | 0   | BT_1446              | 0     | 1000 | 4  | Cofactor and Prosthetic Group Biosynthesis         | PMID:4853401, 20693992                      | B. thetaiotaomicron does not require biotin (PMID:4853401). Most likely, biotin is synthesized as described in PMID:20693992.                                                                                                    | 6.3.3.3   |
| rxn01217    | DCMPDA      | dCMP deaminase                                           | h2o[c] + h[c] + dcmp[c] <=> nh4[c] + dump[c]                   | 1   | BT_4260              | -1000 | 1000 | 2  | Nucleotide Salvage Pathway                         |                                             | Irreversible in SEED                                                                                                                                                                                                             | 3.5.4.12  |
| rxn01800    | DCYTD       | deoxycytidine deaminase                                  | h2o[c] + h[c] + dcyt[c] => nh4[c] + duri[c]                    | 0   | BT_1539              | 0     | 1000 | 2  | Nucleotide Salvage Pathway                         |                                             |                                                                                                                                                                                                                                  | 3.5.4.14  |
| rxn05205    | DCYTt2r     | deoxycytidine transport in via proton symport reversible | h[e] + dcyt[e] <=> h[c] + dcyt[c]                              | 1   | BT_4330              | -1000 | 1000 | 2  | Transport, Extracellular                           |                                             |                                                                                                                                                                                                                                  |           |
| rxn01123    | DDGLKr      | 2-dehydro-3-deoxygluconate kinase                        | atp[c] + 2ddgln[c] <=> h[c] + adp[c] + 2ddg6p[c]               | 1   | BT_0488              | -1000 | 1000 | 2  | Pentose and Glucuronate Interconversions           |                                             |                                                                                                                                                                                                                                  | 2.7.1.45  |
| rxn01332    | DDPA        | 3-deoxy-D-arabino-heptulosonate 7-phosphate synthetase   | h2o[c] + pep[c] + e4p[c] => pi[c] + 2dda7p[c]                  | 0   | BT_3934              | 0     | 1000 | 2  | Tyrosine, Tryptophan, and Phenylalanine Metabolism |                                             | putative gene annotation                                                                                                                                                                                                         | 4.1.2.15  |
| rxn00328    | DDPGA       | 2-dehydro-3-deoxy-phosphogluconate aldolase              | 4h2oglt[c] <=> pyr[c] + glx[c]                                 | 1   | BT_0489              | -1000 | 1000 | 2  | Arginine and Proline Metabolism                    |                                             |                                                                                                                                                                                                                                  | 4.1.2.14  |

| SEED Rxn ID | BIGG Rxn ID | Function                                                      | Formula                                                       | Rev | GA                   | LB    | UB   | CS | Subsystem                                  | Reference   | Notes                                                                                                                                                                                          | EC Number |
|-------------|-------------|---------------------------------------------------------------|---------------------------------------------------------------|-----|----------------------|-------|------|----|--------------------------------------------|-------------|------------------------------------------------------------------------------------------------------------------------------------------------------------------------------------------------|-----------|
|             | DEXTRAN40e  | alpha-dextrin endo-1,6-alpha-glucosidase/pullulanase          | 40 h2o[e] + dextran40[e] => 40 malt[e]                        | 0   | (BT_1663 or BT_4689) | 0     | 1000 | 4  | Plant Polysaccharide Degradation           | PMID:848954 | Assumed to perform dextran (alpha-1,6-glucan) degradation. Maltose is the smallest sugar that it can release from an alpha-(1->6)-linkage (KEGG Enzyme). B. thetaiotaomicron ferments dextran. | 3.2.1.41  |
|             | DGC3D       | 2-deoxy-D-gluconate 3-dehydrogenase                           | nad[c] + 2dglcn[c] => h[c] + nadh[c] + 3ddgc[c]               | 0   | (BT_3232 or BT_1015) | 0     | 1000 | 2  | Pentose and Glucuronate Interconversions   |             | Gene annotation was drawn from The SEED.                                                                                                                                                       | 1.1.1.125 |
|             | DGC3D2      | 2-deoxy-D-gluconate 3-dehydrogenase                           | nad[c] + 2ddglcn[c] <=> h[c] + nadh[c] + dkdglcn[c]           | 1   | (BT_3232 or BT_1015) | -1000 | 1000 | 2  | Pentose and Glucuronate Interconversions   |             | Gene annotation was drawn from The SEED.                                                                                                                                                       | 1.1.1.125 |
| rxn01509    | DGK1        | deoxyguanylate kinase (dGMP:ATP)                              | atp[c] + dgmp[c] <=> adp[c] + dgdp[c]                         | 1   | BT_2009              | -1000 | 1000 | 2  | Nucleotide Salvage Pathway                 |             |                                                                                                                                                                                                | 2.7.4.8   |
| rxn09688    | DGSNt2      | deoxyguanosine transport in via proton symport                | h[e] + dgsn[e] => h[c] + dgsn[c]                              | 0   | BT_4330              | 0     | 1000 | 2  | Transport, Extracellular                   |             |                                                                                                                                                                                                |           |
| rxn00898    | DHAD1       | dihydroxy-acid dehydratase (2,3-dihydroxy-3-methylbutanoate)  | 23dhmb[c] => h2o[c] + 3mob[c]                                 | 0   | BT_2078              | 0     | 1000 | 2  | Valine, Leucine, and Isoleucine Metabolism |             |                                                                                                                                                                                                | 4.2.1.9   |
| rxn03437    | DHAD2       | Dihydroxy-acid dehydratase (2,3-dihydroxy-3-methylpentanoate) | 23dhmp[c] => h2o[c] + 3mop[c]                                 | 0   | BT_2078              | 0     | 1000 | 2  | Valine, Leucine, and Isoleucine Metabolism |             |                                                                                                                                                                                                | 4.2.1.9   |
| rxn02929    | DHDPRy      | dihydrodipicolinate reductase (NADPH)                         | h[c] + nadph[c] + 23dhdp[c] => thdp[c] + nadp[c]              | 0   | BT_3320              | 0     | 1000 | 2  | Threonine and Lysine Metabolism            |             | Reversible reaction in Model SEED                                                                                                                                                              | 1.3.1.26  |
| rxn01644    | DHDPS       | dihydrodipicolinate synthase                                  | pyr[c] + aspsa[c] => 2 h2o[c] + h[c] + 23dhdp[c]              | 0   | (BT_0895 or BT_2814) | 0     | 1000 | 2  | Threonine and Lysine Metabolism            |             |                                                                                                                                                                                                | 4.2.1.52  |
| rxn00686    | DHFR        | dihydrofolate reductase                                       | h[c] + nadph[c] + dhf[c] <=> nadp[c] + thf[c]                 | 1   | (BT_0106 or BT_2048) | -1000 | 1000 | 2  | Folate Metabolism                          |             |                                                                                                                                                                                                | 1.5.1.3   |
| rxn01603    | DHFS        | dihydrofolate synthase                                        | glu-L[c] + atp[c] + dhpt[c] => h[c] + pi[c] + adp[c] + dhf[c] | 0   | BT_1335              | 0     | 1000 | 2  | Cofactor and Prosthetic Group Biosynthesis |             |                                                                                                                                                                                                | 6.3.2.12  |

| SEED Rxn ID | BIGG Rxn ID | Function                                                                  | Formula                                                     | Rev | GA                   | LB | UB   | CS | Subsystem                                  | Reference    | Notes                                                                                                                                                                                               | EC Number |
|-------------|-------------|---------------------------------------------------------------------------|-------------------------------------------------------------|-----|----------------------|----|------|----|--------------------------------------------|--------------|-----------------------------------------------------------------------------------------------------------------------------------------------------------------------------------------------------|-----------|
|             | DHNAOT10    | 1,4-dihydroxy-2-naphthoate octaprenyltransferase (demethylmenaquinone 10) | dhna[c] + octdp[c] => h[c] + 2 co2[c] + ppi[c] + 2dmmq10[c] | 0   |                      | 0  | 1000 | 3  | Cofactor and Prosthetic Group Biosynthesis | PMID:6102980 | B. thetaiotaomicron produces menaquinone 7,8,9,10 and 11. MK-10 and MK-11 are the main components.Note: Reaction is unbalanced, but I don't know to fix this. KEGG doesn't have any information. AH |           |
|             | DHNAOT11    | 1,4-dihydroxy-2-naphthoate octaprenyltransferase (demethylmenaquinone 11) | dhna[c] + octdp[c] => h[c] + 8 co2[c] + ppi[c] + 2dmmq11[c] | 0   |                      | 0  | 1000 | 3  | Cofactor and Prosthetic Group Biosynthesis | PMID:6102980 | B. thetaiotaomicron produces menaquinone 7,8,9,10 and 11. MK-10 and MK-11 are the main components.Note: Reaction is unbalanced, but I don't know to fix this. KEGG doesn't have any information. AH |           |
| rxn08333    | DHNAOT4     | 1,4-dihydroxy-2-naphthoate octaprenyltransferase                          | h[c] + dhna[c] + octdp[c] => co2[c] + ppi[c] + 2dmmq18[c]   | 0   | (BT_2014 or BT_2015) | 0  | 1000 | 3  | Cofactor and Prosthetic Group Biosynthesis | PMID:6102980 | B. thetaiotaomicron produces menaquinone 7,8,9,10 and 11. MK-10 and MK-11 are the main components.Note: Reaction is unbalanced, but I don't know to fix this. KEGG doesn't have any information. AH | 2.5.1.-   |

| SEED Rxn ID | BIGG Rxn ID | Function                                                                 | Formula                                                  | Rev | GA                                 | LB    | UB   | CS | Subsystem                                  | Reference    | Notes                                                                                                                                                                                               | EC Number |
|-------------|-------------|--------------------------------------------------------------------------|----------------------------------------------------------|-----|------------------------------------|-------|------|----|--------------------------------------------|--------------|-----------------------------------------------------------------------------------------------------------------------------------------------------------------------------------------------------|-----------|
|             | DHNAOT7     | 1,4-dihydroxy-2-naphthoate octaprenyltransferase (demethylmenaquinone 7) | dhna[c] + octdp[c] => h[c] + co2[c] + ppi[c] + 2dmmq7[c] | 0   | (BT_2014 or BT_2015)               | 0     | 1000 | 3  | Cofactor and Prosthetic Group Biosynthesis | PMID:6102980 | B. thetaiotaomicron produces menaquinone 7,8,9,10 and 11. MK-10 and MK-11 are the main components.Note: Reaction is unbalanced, but I don't know to fix this. KEGG doesn't have any information. AH |           |
|             | DHNAOT9     | 1,4-dihydroxy-2-naphthoate octaprenyltransferase (demethylmenaquinone 9) | dhna[c] + octdp[c] => h[c] + co2[c] + ppi[c] + 2dmmq9[c] | 0   | (BT_2014 or BT_2015)               | 0     | 1000 | 3  | Cofactor and Prosthetic Group Biosynthesis | PMID:6102980 | B. thetaiotaomicron produces menaquinone 7,8,9,10 and 11. MK-10 and MK-11 are the main components.Note: Reaction is unbalanced, but I don't know to fix this. KEGG doesn't have any information. AH |           |
| rxn02504    | DHNPA       | dihydroneopterin aldolase                                                | dhnp[c] => h[c] + gcald[c] + 2ahhmp[c]                   | 0   | BT_2149                            | 0     | 1000 | 2  | Folate Metabolism                          |              |                                                                                                                                                                                                     | 4.1.2.25  |
|             | DHORDfum    | Fumarate dependent DHORD                                                 | fum[c] + dhor-S[c] => succ[c] + orot[c]                  | 0   | (BT_1009 or (BT_0891 and BT_0892)) | 0     | 1000 | 2  | Purine and Pyrimidine Biosynthesis         |              | Gene was incorrectly annotated by Model SEED, correct: dihydroorotate dehydrogenase (fumarate)                                                                                                      | 1.3.98.1  |
| rxn01360    | DHORDi      | (S)-Dihydroorotate oxygen oxidoreductase                                 | o2[c] + dhor-S[c] => h2o2[c] + orot[c]                   | 0   | (BT_1009 or (BT_0891 and BT_0892)) | 0     | 1000 | 2  | Purine and Pyrimidine Biosynthesis         |              |                                                                                                                                                                                                     | 1.3.3.1   |
| rxn01465    | DHORTS      | dihydroorotase                                                           | h2o[c] + dhor-S[c] <=> h[c] + cbasp[c]                   | 1   | BT_0250                            | -1000 | 1000 | 2  | Purine and Pyrimidine Biosynthesis         |              |                                                                                                                                                                                                     | 3.5.2.3   |
| rxn02475    | DHPPDA      | diaminohydroxyphosphoribosylaminopyrimidine deaminase                    | h2o[c] + h[c] + 25dhpp[c] => nh4[c] + 5apru[c]           | 0   | BT_3728                            | 0     | 1000 | 2  | Cofactor and Prosthetic Group Biosynthesis |              |                                                                                                                                                                                                     | 3.5.4.26  |
| rxn02200    | DHPS        | dihydropteroate synthase                                                 | 4abz[c] + 2ahhmp[c] => h2o[c] + dhpt[c]                  | 0   | BT_3646                            | 0     | 1000 | 2  | Folate Metabolism                          |              | Reversible reaction in Model SEED                                                                                                                                                                   | 2.5.1.15  |

| SEED Rxn ID | BIGG Rxn ID | Function                                                                        | Formula                                                   | Rev | GA                   | LB | UB   | CS | Subsystem                                          | Reference | Notes                                                                                                | EC Number |
|-------------|-------------|---------------------------------------------------------------------------------|-----------------------------------------------------------|-----|----------------------|----|------|----|----------------------------------------------------|-----------|------------------------------------------------------------------------------------------------------|-----------|
|             | DHPS3       | 7,8 dihydropteroate synthase (methanopterin)                                    | 6hmhptpp[c] + Brfap[c] => ppi[c] + dhrfap[c]              | 0   | BT_1410              | 0  | 1000 | 2  | Cofactor and Prosthetic Group Biosynthesis         |           | Gene annotation was drawn from The SEED.                                                             | 2.5.1.15  |
| rxn02212    | DHQS        | 3-dehydroquinate synthase                                                       | 2dda7p[c] => pi[c] + 3dhq[c]                              | 0   | BT_3975              | 0  | 1000 | 2  | Tyrosine, Tryptophan, and Phenylalanine Metabolism |           |                                                                                                      | 4.2.3.4   |
| rxn02213    | DHQTi       | 3-dehydroquinate dehydratase, irreversible                                      | 3dhq[c] => h2o[c] + 3dhsk[c]                              | 0   | BT_2842              | 0  | 1000 | 2  | Tyrosine, Tryptophan, and Phenylalanine Metabolism |           |                                                                                                      | 4.2.1.10  |
| rxn09687    | DINST2      | deoxyinosine transport in via proton symport                                    | h[e] + din[e] => h[c] + din[c]                            | 0   | BT_4330              | 0  | 1000 | 2  | Transport, Extracellular                           |           | Reversible reaction in Model SEED                                                                    |           |
|             | DM_4HBA     | Sink needed to allow 4-hydroxy-benzoate to leave system                         | 4hba[c] =>                                                | 0   |                      | 0  | 1000 | 0  | exchange/dem and reaction                          |           |                                                                                                      |           |
|             | DM_5DRIB    | Sink needed to allow 5'-deoxyribose to leave system                             | 5drib[c] =>                                               | 0   |                      | 0  | 1000 | 0  | exchange/dem and reaction                          |           |                                                                                                      |           |
|             | DM_AMOB     | Sink needed to allow S-Adenosyl-4-methylthio-2-oxobutanoate to leave the system | amob[c] =>                                                | 0   |                      | 0  | 1000 | 0  | exchange/dem and reaction                          |           |                                                                                                      |           |
| rxn01213    | DMATT       | dimethylallyltranstransferase                                                   | dmpp[c] + ipdp[c] => ppi[c] + grdp[c]                     | 0   | (BT_3261 or BT_2058) | 0  | 1000 | 2  | Cofactor and Prosthetic Group Biosynthesis         |           |                                                                                                      | 2.5.1.1   |
| rxn08352    | DMPPS       | 1-hydroxy-2-methyl-2-(E)-butenyl 4-diphosphate reductase (dmpp)                 | h[c] + nadh[c] + h2mb4p[c] => h2o[c] + nad[c] + dmpp[c]   | 0   | BT_2061              | 0  | 1000 | 2  | Cofactor and Prosthetic Group Biosynthesis         |           |                                                                                                      | 1.17.1.2  |
| rxn04996    | DMPPS2      | 4-hydroxy-3-methylbut-2-enyl diphosphate reductase (NADP)                       | h[c] + nadph[c] + h2mb4p[c] => h2o[c] + nadp[c] + dmpp[c] | 0   | BT_2061              | 0  | 1000 | 2  | Cofactor and Prosthetic Group Biosynthesis         |           | Added manually to BIGG database based on SEED database. Reviewed gene (NCBI Gene, updated 08.01.11). | 1.17.1.2  |

| SEED Rxn ID | BIGG Rxn ID | Function                                                                    | Formula                                             | Rev | GA                                            | LB    | UB   | CS | Subsystem                                  | Reference    | Notes                                                                                                                                                                                                                                    | EC Number |
|-------------|-------------|-----------------------------------------------------------------------------|-----------------------------------------------------|-----|-----------------------------------------------|-------|------|----|--------------------------------------------|--------------|------------------------------------------------------------------------------------------------------------------------------------------------------------------------------------------------------------------------------------------|-----------|
| rxn11946    | DMQMT       | 3-Dimethylubiquinol 3-methyltransferase                                     | amet[c] + 2omhmb[l][c] => h[c] + ahcys[c] + q8h2[c] | 0   | BT_3209                                       | 0     | 1000 | 2  | Cofactor and Prosthetic Group Biosynthesis | PMID: 893348 | It is not clear whether only menaquinone or mq and ubiquinone are synthesized. PMID: 893348 states that only menaquinone is present, however ubiquinone-using enzymes are annotated in B. thetaiotaomicron genome.                       | 2.1.1.64  |
| rxn00100    | DPCOAK      | dephospho-CoA kinase                                                        | atp[c] + dpcoa[c] => h[c] + coa[c] + adp[c]         | 0   | BT_4594                                       | 0     | 1000 | 2  | Cofactor and Prosthetic Group Biosynthesis |              | Putative annotation (NCBI)                                                                                                                                                                                                               | 2.7.1.24  |
| rxn01790    | DPR         | 2-dehydropantoate 2-reductase                                               | h[c] + nadph[c] + 2dhp[c] => nadp[c] + pant-R[c]    | 0   | (BT_2074 or BT_3117)                          | 0     | 1000 | 2  | Cofactor and Prosthetic Group Biosynthesis |              | Reversible in SEED                                                                                                                                                                                                                       | 1.1.1.169 |
| rxn01987    | DRBKr       | Deoxyribokinase                                                             | h[c] + adp[c] + 2dr5p[c] <=> atp[c] + drib[c]       | 1   | (BT_2799 or BT_3576 or (BT_2803 and BT_2804)) | -1000 | 1000 | 2  | Pentose Phosphate Pathway                  |              |                                                                                                                                                                                                                                          | 2.7.1.15  |
| rxn00784    | DRPAr       | 2-Deoxy-D-ribose-5-phosphate acetaldehyde-lyase                             | 2dr5p[c] <=> acald[c] + g3p[c]                      | 1   | (BT_3263 or BT_4425)                          | -1000 | 1000 | 2  | Alternate Carbon Metabolism                |              |                                                                                                                                                                                                                                          | 4.1.2.4   |
|             | DT5HSUt2r   | 5-Dehydro-4-deoxy-D-glucuronate transport in via proton symport, reversible | h[e] + dt5hsu[e] <=> h[c] + dt5hsu[c]               | 1   | BT_4105                                       | -1000 | 1000 | 2  | Transport, Extracellular                   | PMID:3968032 | Added to allow complete degradation of pectin, not sure if this degradation product is generated in periplasm or cytosol. Degradation pathway may be slightly different. Added based on NCBI Gene (annotation: hexouronate transporter). |           |
| rxn01513    | DTMPK       | dTMP kinase                                                                 | atp[c] + dtmp[c] <=> adp[c] + dtdp[c]               | 1   |                                               | -1000 | 1000 | 1  | Nucleotide Salvage Pathway                 |              | Added by Model SEED during auto-completion step in pipeline.                                                                                                                                                                             | 2.7.4.9   |

| SEED Rxn ID | BIGG Rxn ID | Function                                                | Formula                                                 | Rev | GA                   | LB    | UB   | CS | Subsystem                                  | Reference                                   | Notes                                                                            | EC Number |
|-------------|-------------|---------------------------------------------------------|---------------------------------------------------------|-----|----------------------|-------|------|----|--------------------------------------------|---------------------------------------------|----------------------------------------------------------------------------------|-----------|
| rxn01518    | DURIK1      | deoxyuridine kinase (ATP:Deoxyuridine)                  | atp[c] + duri[c] => h[c] + adp[c] + dump[c]             | 0   | BT_2275              | 0     | 1000 | 2  | Nucleotide Salvage Pathway                 |                                             | Reversible in SEED                                                               | 2.7.1.21  |
| rxn01799    | DURIPP      | deoxyuridine phosphorylase                              | pi[c] + duri[c] <=> 2dr1p[c] + ura[c]                   | 1   | (BT_1881 or BT_4554) | -1000 | 1000 | 2  | Nucleotide Salvage Pathway                 |                                             |                                                                                  |           |
| rxn09685    | DURIt2      | deoxyuridine transport in via proton symport            | h[e] + duri[e] => h[c] + duri[c]                        | 0   | BT_4330              | 0     | 1000 | 2  | Transport, Extracellular                   |                                             | Reversible in SEED                                                               |           |
| rxn01519    | DUTPDP      | dUTP diphosphatase                                      | h2o[c] + dudp[c] => h[c] + ppi[c] + dump[c]             | 0   | (BT_3461 or BT_4350) | 0     | 1000 | 2  | Nucleotide Salvage Pathway                 |                                             |                                                                                  | 3.6.1.23  |
| rxn03958    | DXPRIi      | 1-deoxy-D-xylulose reductoisomerase                     | h[c] + nadph[c] + dxyl5p[c] => nadp[c] + 2me4p[c]       | 0   | BT_2002              | 0     | 1000 | 2  | Cofactor and Prosthetic Group Biosynthesis |                                             |                                                                                  |           |
| rxn03909    | DXPS        | 1-deoxy-D-xylulose 5-phosphate synthase                 | h[c] + pyr[c] + g3p[c] => co2[c] + dxyl5p[c]            | 0   | (BT_1403 or BT_4099) | 0     | 1000 | 2  | Cofactor and Prosthetic Group Biosynthesis |                                             |                                                                                  |           |
| rxn01331    | E4PD        | Erythrose 4-phosphate dehydrogenase                     | h2o[c] + nad[c] + e4p[c] <=> 2 h[c] + nadh[c] + 4per[c] | 1   | BT_4263              | -1000 | 1000 | 2  | Cofactor and Prosthetic Group Biosynthesis |                                             |                                                                                  | 1.2.1.72  |
|             | EACPR1      | Enoyl-ACP-reductase (FabI)                              | h[c] + nadph[c] + egACPm[c] => nadp[c] + gACPm[c]       | 0   | BT_4188              | 0     | 1000 | 3  | Biotin Metabolism                          | PMID:20693992                               | Based on biotin synthesis described in PMID:20693992 for E. coli                 |           |
|             | EACPR2      | Enoyl-ACP-reductase (FabI)                              | h[c] + nadph[c] + epACPm[c] => nadp[c] + pmACPm[c]      | 0   | BT_4188              | 0     | 1000 | 3  | Biotin Metabolism                          | PMID:20693992                               | Based on biotin synthesis described in PMID:20693992 for E. coli                 |           |
| rxn05327    | EAR100x     | enoyl-[acyl-carrier-protein] reductase (NADH) (n-C10:0) | h[c] + tdec2eACP[c] + nadh[c] => dcaACP[c] + nad[c]     | 0   | BT_4188              | 0     | 1000 | 3  | Cell Envelope Biosynthesis                 | PMID: 6102980, PMID: 7440508, PMID: 7204330 | The fatty acid composition of B. thetaiotaomicron was determined experimentally. | 1.3.1.9   |

| SEED Rxn ID | BIGG Rxn ID | Function                                                          | Formula                                                       | Rev | GA      | LB | UB   | CS | Subsystem                  | Reference                                   | Notes                                                                                                                                                                                                                            | EC Number |
|-------------|-------------|-------------------------------------------------------------------|---------------------------------------------------------------|-----|---------|----|------|----|----------------------------|---------------------------------------------|----------------------------------------------------------------------------------------------------------------------------------------------------------------------------------------------------------------------------------|-----------|
| rxn05448    | EAR10M11x   | 10-methyl-trans-undec-2-enoyl-ACPNAD+ oxidoreductase (A-specific) | h[c] + 10mtundec2eACP[c] + nadh[c] => 10mundecACP[c] + nad[c] | 0   | BT_4188 | 0  | 1000 | 3  | Cell Envelope Biosynthesis | PMID: 6102980, PMID: 7440508, PMID: 7204330 | Added manually to BIGG database based on reaction mechanism proposed by Model SEED. This reaction is involved in fatty acid biosynthesis. B. thetaiotaomicron is well known to synthesize iso- and anteiso-branched fatty acids. | 1.3.1.9   |
| rxn05436    | EAR10M12x   | 10-methyl-trans-dodec-2-enoyl-ACPNAD+ oxidoreductase (A-specific) | h[c] + 10mtddec2eACP[c] + nadh[c] => 10mddcaACP[c] + nad[c]   | 0   | BT_4188 | 0  | 1000 | 3  | Cell Envelope Biosynthesis | PMID: 6102980, PMID: 7440508, PMID: 7204330 | Added manually to BIGG database based on reaction mechanism proposed by Model SEED. This reaction is involved in fatty acid biosynthesis. B. thetaiotaomicron is well known to synthesize iso- and anteiso-branched fatty acids. | 1.3.1.9   |
| rxn05442    | EAR11M12x   | 11-methyl-trans-dodec-2-enoyl-ACPNAD+ oxidoreductase (A-specific) | h[c] + 11mtddec2eACP[c] + nadh[c] => 11mddcaACP[c] + nad[c]   | 0   | BT_4188 | 0  | 1000 | 3  | Cell Envelope Biosynthesis | PMID: 6102980, PMID: 7440508, PMID: 7204330 | Added manually to BIGG database based on reaction mechanism proposed by Model SEED. This reaction is involved in fatty acid biosynthesis. B. thetaiotaomicron is well known to synthesize iso- and anteiso-branched fatty acids. | 1.3.1.9   |
| rxn05324    | EAR120x     | enoyl-[acyl-carrier-protein] reductase (NADH) (n-C12:0)           | h[c] + tddec2eACP[c] + nadh[c] => ddcaACP[c] + nad[c]         | 0   | BT_4188 | 0  | 1000 | 3  | Cell Envelope Biosynthesis | PMID: 6102980, PMID: 7440508, PMID: 7204330 | The fatty acid composition of B. thetaiotaomicron was determined experimentally.                                                                                                                                                 | 1.3.1.9   |

| SEED Rxn ID | BIGG Rxn ID | Function                                                             | Formula                                                         | Rev | GA      | LB | UB   | CS | Subsystem                  | Reference                                   | Notes                                                                                                                                                                                                                            | EC Number |
|-------------|-------------|----------------------------------------------------------------------|-----------------------------------------------------------------|-----|---------|----|------|----|----------------------------|---------------------------------------------|----------------------------------------------------------------------------------------------------------------------------------------------------------------------------------------------------------------------------------|-----------|
|             | EAR121x     | enoyl-[acyl-carrier-protein] reductase (NADH) (n-C12:1)              | h[c] + t3c5ddeceACP[c] + nadh[c] => cddec5eACP[c] + nad[c]      | 0   | BT_4188 | 0  | 1000 | 3  | Cell Envelope Biosynthesis | PMID: 6102980, PMID: 7440508, PMID: 7204330 | The fatty acid composition of B. thetaiotaomicron was determined experimentally.                                                                                                                                                 | 1.3.1.9   |
| rxn05449    | EAR12M13x   | 12-methyl-trans-tridec-2-enoyl-ACPNAD+ oxidoreductase (A-specific)   | h[c] + 12mttritec2eACP[c] + nadh[c] => 12mtridecACP[c] + nad[c] | 0   | BT_4188 | 0  | 1000 | 3  | Cell Envelope Biosynthesis | PMID: 6102980, PMID: 7440508, PMID: 7204330 | Added manually to BIGG database based on reaction mechanism proposed by Model SEED. This reaction is involved in fatty acid biosynthesis. B. thetaiotaomicron is well known to synthesize iso- and anteiso-branched fatty acids. | 1.3.1.9   |
| rxn05437    | EAR12M14x   | 12-methyl-trans-tetradec-2-enoyl-ACPNAD+ oxidoreductase (A-specific) | h[c] + 12mtmrs2eACP[c] + nadh[c] => 12mmysACP[c] + nad[c]       | 0   | BT_4188 | 0  | 1000 | 3  | Cell Envelope Biosynthesis | PMID: 6102980, PMID: 7440508, PMID: 7204330 | Added manually to BIGG database based on reaction mechanism proposed by Model SEED. This reaction is involved in fatty acid biosynthesis. B. thetaiotaomicron is well known to synthesize iso- and anteiso-branched fatty acids. | 1.3.1.9   |
| rxn05443    | EAR13M14x   | 13-methyl-trans-tetradec-2-enoyl-ACPNAD+ oxidoreductase (A-specific) | h[c] + 13mtmrs2eACP[c] + nadh[c] => 13mmysACP[c] + nad[c]       | 0   | BT_4188 | 0  | 1000 | 3  | Cell Envelope Biosynthesis | PMID: 6102980, PMID: 7440508, PMID: 7204330 | Added manually to BIGG database based on reaction mechanism proposed by Model SEED. This reaction is involved in fatty acid biosynthesis. B. thetaiotaomicron is well known to synthesize iso- and anteiso-branched fatty acids. | 1.3.1.9   |

| SEED Rxn ID | BIGG Rxn ID | Function                                                             | Formula                                                           | Rev | GA      | LB | UB   | CS | Subsystem                  | Reference                                   | Notes                                                                                                                                                                                                                            | EC Number |
|-------------|-------------|----------------------------------------------------------------------|-------------------------------------------------------------------|-----|---------|----|------|----|----------------------------|---------------------------------------------|----------------------------------------------------------------------------------------------------------------------------------------------------------------------------------------------------------------------------------|-----------|
| rxn05323    | EAR140x     | enoyl-[acyl-carrier-protein] reductase (NADH) (n-C14:0)              | h[c] + tmrs2eACP[c] + nadh[c] => myrsACP[c] + nad[c]              | 0   | BT_4188 | 0  | 1000 | 3  | Cell Envelope Biosynthesis | PMID: 6102980, PMID: 7440508, PMID: 7204330 | The fatty acid composition of B. thetaiotaomicron was determined experimentally.                                                                                                                                                 | 1.3.1.9   |
|             | EAR141x     | enoyl-[acyl-carrier-protein] reductase (NADH) (n-C14:1)              | h[c] + t3c7mrseACP[c] + nadh[c] => tdeACP[c] + nad[c]             | 0   | BT_4188 | 0  | 1000 | 3  | Cell Envelope Biosynthesis | PMID: 6102980, PMID: 7440508, PMID: 7204330 | The fatty acid composition of B. thetaiotaomicron was determined experimentally.                                                                                                                                                 | 1.3.1.9   |
| rxn05450    | EAR14M15x   | 14-methyl-trans-pentadec-2-enoyl-ACPNAD+ oxidoreductase (A-specific) | h[c] + 14mtpentdec2eACP[c] + nadh[c] => nad[c] + 14mpentdecACP[c] | 0   | BT_4188 | 0  | 1000 | 3  | Cell Envelope Biosynthesis | PMID: 6102980, PMID: 7440508, PMID: 7204330 | Added manually to BIGG database based on reaction mechanism proposed by Model SEED. This reaction is involved in fatty acid biosynthesis. B. thetaiotaomicron is well known to synthesize iso- and anteiso-branched fatty acids. | 1.3.1.9   |
| rxn05438    | EAR14M16x   | 14-methyl-trans-hexadec-2-enoyl-ACPNAD+ oxidoreductase (A-specific)  | h[c] + 14mtpalm2eACP[c] + nadh[c] => nad[c] + 14mpalmACP[c]       | 0   | BT_4188 | 0  | 1000 | 3  | Cell Envelope Biosynthesis | PMID: 6102980, PMID: 7440508, PMID: 7204330 | Added manually to BIGG database based on reaction mechanism proposed by Model SEED. This reaction is involved in fatty acid biosynthesis. B. thetaiotaomicron is well known to synthesize iso- and anteiso-branched fatty acids. | 1.3.1.9   |

| SEED Rxn ID | BIGG Rxn ID | Function                                                             | Formula                                                     | Rev | GA      | LB | UB   | CS | Subsystem                  | Reference                                   | Notes                                                                                                                                                                                                                            | EC Number |
|-------------|-------------|----------------------------------------------------------------------|-------------------------------------------------------------|-----|---------|----|------|----|----------------------------|---------------------------------------------|----------------------------------------------------------------------------------------------------------------------------------------------------------------------------------------------------------------------------------|-----------|
| rxn05444    | EAR15M16x   | 15-methyl-trans-hexadec-2-enoyl-ACP:NAD+ oxidoreductase (A-specific) | h[c] + 15mtpalm2eACP[c] + nadh[c] => nad[c] + 15mpalmACP[c] | 0   | BT_4188 | 0  | 1000 | 3  | Cell Envelope Biosynthesis | PMID: 6102980, PMID: 7440508, PMID: 7204330 | Added manually to BIGG database based on reaction mechanism proposed by Model SEED. This reaction is involved in fatty acid biosynthesis. B. thetaiotaomicron is well known to synthesize iso- and anteiso-branched fatty acids. | 1.3.1.9   |
| rxn05328    | EAR160x     | enoyl-[acyl-carrier-protein] reductase (NADH) (n-C16:0)              | h[c] + tpalm2eACP[c] + nadh[c] => palmACP[c] + nad[c]       | 0   | BT_4188 | 0  | 1000 | 3  | Cell Envelope Biosynthesis | PMID: 6102980, PMID: 7440508, PMID: 7204330 | The fatty acid composition of B. thetaiotaomicron was determined experimentally.                                                                                                                                                 | 1.3.1.9   |
|             | EAR161x     | enoyl-[acyl-carrier-protein] reductase (NADH) (n-C16:1)              | h[c] + t3c9palmeACP[c] + nadh[c] => hdeACP[c] + nad[c]      | 0   | BT_4188 | 0  | 1000 | 3  | Cell Envelope Biosynthesis | PMID: 6102980, PMID: 7440508, PMID: 7204330 | The fatty acid composition of B. thetaiotaomicron was determined experimentally.                                                                                                                                                 | 1.3.1.9   |
| rxn05464    | EAR180x     | enoyl-[acyl-carrier-protein] reductase (NADH) (n-C18:0)              | h[c] + toctd2eACP[c] + nadh[c] => nad[c] + ocdcaACP[c]      | 0   | BT_4188 | 0  | 1000 | 3  | Cell Envelope Biosynthesis | PMID: 6102980, PMID: 7440508, PMID: 7204330 | The fatty acid composition of B. thetaiotaomicron was determined experimentally.                                                                                                                                                 | 1.3.1.9   |
|             | EAR181x     | enoyl-[acyl-carrier-protein] reductase (NADH) (n-C18:1)              | h[c] + t3c11vaceACP[c] + nadh[c] => nad[c] + octeACP[c]     | 0   | BT_4188 | 0  | 1000 | 3  | Cell Envelope Biosynthesis | PMID: 6102980, PMID: 7440508, PMID: 7204330 | The fatty acid composition of B. thetaiotaomicron was determined experimentally.                                                                                                                                                 | 1.3.1.9   |
| rxn05322    | EAR40x      | enoyl-[acyl-carrier-protein] reductase (NADH) (n-C4:0)               | h[c] + but2eACP[c] + nadh[c] => butACP[c] + nad[c]          | 0   | BT_4188 | 0  | 1000 | 3  | Cell Envelope Biosynthesis | PMID: 6102980, PMID: 7440508, PMID: 7204330 | The fatty acid composition of B. thetaiotaomicron was determined experimentally.                                                                                                                                                 | 1.3.1.9   |

| SEED Rxn ID | BIGG Rxn ID | Function                                                        | Formula                                                   | Rev | GA      | LB | UB   | CS | Subsystem                  | Reference                                   | Notes                                                                                                                                                                                                                            | EC Number |
|-------------|-------------|-----------------------------------------------------------------|-----------------------------------------------------------|-----|---------|----|------|----|----------------------------|---------------------------------------------|----------------------------------------------------------------------------------------------------------------------------------------------------------------------------------------------------------------------------------|-----------|
| rxn05445    | EAR4M5x     | 4-methyl-trans-pent-2-enoyl-ACPNAD+ oxidoreductase (A-specific) | h[c] + 4mtpent2eACP[c] + nadh[c] => 4mpentACP[c] + nad[c] | 0   | BT_4188 | 0  | 1000 | 3  | Cell Envelope Biosynthesis | PMID: 6102980, PMID: 7440508, PMID: 7204330 | Added manually to BIGG database based on reaction mechanism proposed by Model SEED. This reaction is involved in fatty acid biosynthesis. B. thetaiotaomicron is well known to synthesize iso- and anteiso-branched fatty acids. | 1.3.1.9   |
| rxn05433    | EAR4M6x     | 4-methyl-trans-hex-2-enoyl-ACPNAD+ oxidoreductase (A-specific)  | h[c] + 4mthex2eACP[c] + nadh[c] => 4mhhexACP[c] + nad[c]  | 0   | BT_4188 | 0  | 1000 | 3  | Cell Envelope Biosynthesis | PMID: 6102980, PMID: 7440508, PMID: 7204330 | Added manually to BIGG database based on reaction mechanism proposed by Model SEED. This reaction is involved in fatty acid biosynthesis. B. thetaiotaomicron is well known to synthesize iso- and anteiso-branched fatty acids. | 1.3.1.9   |
| rxn05439    | EAR5M6x     | 5-methyl-trans-hex-2-enoyl-ACPNAD+ oxidoreductase (A-specific)  | h[c] + 5mthex2eACP[c] + nadh[c] => 5mhhexACP[c] + nad[c]  | 0   | BT_4188 | 0  | 1000 | 3  | Cell Envelope Biosynthesis | PMID: 6102980, PMID: 7440508, PMID: 7204330 | Added manually to BIGG database based on reaction mechanism proposed by Model SEED. This reaction is involved in fatty acid biosynthesis. B. thetaiotaomicron is well known to synthesize iso- and anteiso-branched fatty acids. | 1.3.1.9   |
| rxn05326    | EAR60x      | enoyl-[acyl-carrier-protein] reductase (NADH) (n-C6:0)          | h[c] + thex2eACP[c] + nadh[c] => hexACP[c] + nad[c]       | 0   | BT_4188 | 0  | 1000 | 3  | Cell Envelope Biosynthesis | PMID: 6102980, PMID: 7440508, PMID: 7204330 | The fatty acid composition of B. thetaiotaomicron was determined experimentally.                                                                                                                                                 | 1.3.1.9   |

| SEED Rxn ID | BIGG Rxn ID | Function                                                        | Formula                                                   | Rev | GA      | LB | UB   | CS | Subsystem                  | Reference                                   | Notes                                                                                                                                                                                                                            | EC Number |
|-------------|-------------|-----------------------------------------------------------------|-----------------------------------------------------------|-----|---------|----|------|----|----------------------------|---------------------------------------------|----------------------------------------------------------------------------------------------------------------------------------------------------------------------------------------------------------------------------------|-----------|
| rxn05446    | EAR6M7x     | 6-methyl-trans-hept-2-enoyl-ACPNAD+ oxidoreductase (A-specific) | h[c] + 6mthept2eACP[c] + nadh[c] => 6mheptACP[c] + nad[c] | 0   | BT_4188 | 0  | 1000 | 3  | Cell Envelope Biosynthesis | PMID: 6102980, PMID: 7440508, PMID: 7204330 | Added manually to BIGG database based on reaction mechanism proposed by Model SEED. This reaction is involved in fatty acid biosynthesis. B. thetaiotaomicron is well known to synthesize iso- and anteiso-branched fatty acids. | 1.3.1.9   |
| rxn05434    | EAR6M8x     | 6-methyl-trans-oct-2-enoyl-ACPNAD+ oxidoreductase (A-specific)  | h[c] + 6mtoct2eACP[c] + nadh[c] => 6mocACP[c] + nad[c]    | 0   | BT_4188 | 0  | 1000 | 3  | Cell Envelope Biosynthesis | PMID: 6102980, PMID: 7440508, PMID: 7204330 | Added manually to BIGG database based on reaction mechanism proposed by Model SEED. This reaction is involved in fatty acid biosynthesis. B. thetaiotaomicron is well known to synthesize iso- and anteiso-branched fatty acids. | 1.3.1.9   |
| rxn05440    | EAR7M8x     | 7-methyl-trans-oct-2-enoyl-ACPNAD+ oxidoreductase (A-specific)  | h[c] + 7mtoct2eACP[c] + nadh[c] => 7mocACP[c] + nad[c]    | 0   | BT_4188 | 0  | 1000 | 3  | Cell Envelope Biosynthesis | PMID: 6102980, PMID: 7440508, PMID: 7204330 | Added manually to BIGG database based on reaction mechanism proposed by Model SEED. This reaction is involved in fatty acid biosynthesis. B. thetaiotaomicron is well known to synthesize iso- and anteiso-branched fatty acids. | 1.3.1.9   |
| rxn05325    | EAR80x      | enoyl-[acyl-carrier-protein] reductase (NADH) (n-C8:0)          | h[c] + toct2eACP[c] + nadh[c] => ocACP[c] + nad[c]        | 0   | BT_4188 | 0  | 1000 | 3  | Cell Envelope Biosynthesis | PMID: 6102980, PMID: 7440508, PMID: 7204330 | The fatty acid composition of B. thetaiotaomicron was determined experimentally.                                                                                                                                                 | 1.3.1.9   |

| SEED Rxn ID | BIGG Rxn ID | Function                                                       | Formula                                                 | Rev | GA      | LB    | UB   | CS | Subsystem                  | Reference                                   | Notes                                                                                                                                                                                                                            | EC Number |
|-------------|-------------|----------------------------------------------------------------|---------------------------------------------------------|-----|---------|-------|------|----|----------------------------|---------------------------------------------|----------------------------------------------------------------------------------------------------------------------------------------------------------------------------------------------------------------------------------|-----------|
| rxn05435    | EAR8M10x    | 8-methyl-trans-dec-2-enoyl-ACPNAD+ oxidoreductase (A-specific) | h[c] + 8mtdec2eACP[c] + nadh[c] => 8mdcaACP[c] + nad[c] | 0   | BT_4188 | 0     | 1000 | 3  | Cell Envelope Biosynthesis | PMID: 6102980, PMID: 7440508, PMID: 7204330 | Added manually to BIGG database based on reaction mechanism proposed by Model SEED. This reaction is involved in fatty acid biosynthesis. B. thetaiotaomicron is well known to synthesize iso- and anteiso-branched fatty acids. | 1.3.1.9   |
| rxn05447    | EAR8M9x     | 8-methyl-trans-non-2-enoyl-ACPNAD+ oxidoreductase (A-specific) | h[c] + 8mtnon2eACP[c] + nadh[c] => 8mnonACP[c] + nad[c] | 0   | BT_4188 | 0     | 1000 | 3  | Cell Envelope Biosynthesis | PMID: 6102980, PMID: 7440508, PMID: 7204330 | Added manually to BIGG database based on reaction mechanism proposed by Model SEED. This reaction is involved in fatty acid biosynthesis. B. thetaiotaomicron is well known to synthesize iso- and anteiso-branched fatty acids. | 1.3.1.9   |
| rxn05441    | EAR9M10x    | 9-methyl-trans-dec-2-enoyl-ACPNAD+ oxidoreductase (A-specific) | h[c] + 9mtdec2eACP[c] + nadh[c] => 9mdcaACP[c] + nad[c] | 0   | BT_4188 | 0     | 1000 | 3  | Cell Envelope Biosynthesis | PMID: 6102980, PMID: 7440508, PMID: 7204330 | Added manually to BIGG database based on reaction mechanism proposed by Model SEED. This reaction is involved in fatty acid biosynthesis. B. thetaiotaomicron is well known to synthesize iso- and anteiso-branched fatty acids. | 1.3.1.9   |
| rxn03884    | EDA_R       | 2-dehydro-3-deoxy-D-gluconate-6-phosphate                      | 2ddg6p[c] <=> pyr[c] + g3p[c]                           | 1   | BT_0489 | -1000 | 1000 | 2  | Pentose Phosphate Pathway  |                                             |                                                                                                                                                                                                                                  | 4.1.2.14  |

| SEED Rxn ID | BIGG Rxn ID    | Function                                                     | Formula                                                   | Rev | GA                                                                          | LB    | UB   | CS | Subsystem                       | Reference                                   | Notes                                                                                                                                                                                                                                                                                  | EC Number |
|-------------|----------------|--------------------------------------------------------------|-----------------------------------------------------------|-----|-----------------------------------------------------------------------------|-------|------|----|---------------------------------|---------------------------------------------|----------------------------------------------------------------------------------------------------------------------------------------------------------------------------------------------------------------------------------------------------------------------------------------|-----------|
|             | EDTXS1_BT      | Endotoxin Synthesis (lauroyl transferase)                    | ddcaACP[c] + kdolipid4_bt[c] => ACP[c] + kdolipid4L_bt[c] | 0   | BT_2152                                                                     | 0     | 1000 | 3  | Lipopolysaccharide Biosynthesis | PMID:18931137, PMID:19460428, PMID:20974832 | LPS biosynthesis partly based on reconstruction of the related microbe P. gingivalis (PMID:18931137). Based on structural information taken from (PMID:19460428, PMID:20974832). Could not find information, though, if laurate is really added to kdolipid IV in B. thetaiotaomicron. |           |
| rxn02339    | EHGLAT         | L-erythro-4-Hydroxyglutamate:2-oxoglutarate aminotransferase | akg[c] + e4hglu[c] => glu-L[c] + 4h2oglt[c]               | 0   | (BT_0666 or BT_1077 or BT_1476 or BT_2415 or BT_3375 or BT_3720 or BT_3935) | 0     | 1000 | 2  | Arginine and Proline Metabolism |                                             | Reversible in SEED                                                                                                                                                                                                                                                                     | 2.6.1.1   |
| rxn00459    | ENO            | enolase                                                      | 2pg[c] <=> h2o[c] + pep[c]                                | 1   | BT_4572                                                                     | -1000 | 1000 | 2  | Glycolysis/Gluconeogenesis      |                                             |                                                                                                                                                                                                                                                                                        | 4.2.1.11  |
|             | ETOHt          | ethanol reversible transport                                 | etoh[e] <=> etoh[c]                                       | 1   |                                                                             | -1000 | 1000 | 2  | Transport, Extracellular        | PMID:438119, PMID:17563350                  | Bacteroides produce weak amounts of ethanol under certain circumstances.                                                                                                                                                                                                               |           |
|             | EX_12ethd(e)   | 1,2-Ethandiol exchange                                       | 12ethd[e] <=>                                             | 1   |                                                                             | -1000 | 1000 | 0  | exchange/dem and reaction       |                                             |                                                                                                                                                                                                                                                                                        |           |
|             | EX_12ppd_R(e)  | (R)-Propane-1,2-diol exchange                                | 12ppd-R[e] <=>                                            | 1   |                                                                             | -1000 | 1000 | 0  | exchange/dem and reaction       |                                             |                                                                                                                                                                                                                                                                                        |           |
|             | EX_12ppd_S(e)  | (S)-Propane-1,2-diol exchange                                | 12ppd-S[e] <=>                                            | 1   |                                                                             | -1000 | 1000 | 0  | exchange/dem and reaction       |                                             |                                                                                                                                                                                                                                                                                        |           |
|             | EX_2fuciac(e)  | 2-Fucosyllactose exchange                                    | 2fuciac[e] <=>                                            | 1   |                                                                             | -1000 | 1000 | 0  | exchange/dem and reaction       |                                             |                                                                                                                                                                                                                                                                                        |           |
|             | EX_2omfuc(e)   | 2-o-methylfucose exchange                                    | 2omfuc[e] <=>                                             | 1   |                                                                             | -1000 | 1000 | 0  | exchange/dem and reaction       |                                             |                                                                                                                                                                                                                                                                                        |           |
|             | EX_2omxyl(e)   | 2-O-methylxylose exchange                                    | 2omxyl[e] <=>                                             | 1   |                                                                             | -1000 | 1000 | 0  | exchange/dem and reaction       |                                             |                                                                                                                                                                                                                                                                                        |           |
|             | EX_3ddlhept(e) | 3-deoxy-d-lyxo-heptulosaric acid exchange                    | 3ddlhept[e] <=>                                           | 1   |                                                                             | -1000 | 1000 | 0  | exchange/dem and reaction       |                                             |                                                                                                                                                                                                                                                                                        |           |

| SEED Rxn ID    | BIGG Rxn ID        | Function                                               | Formula             | Rev | GA | LB    | UB   | CS | Subsystem                 | Reference | Notes | EC Number |
|----------------|--------------------|--------------------------------------------------------|---------------------|-----|----|-------|------|----|---------------------------|-----------|-------|-----------|
|                | EX_3fuclac(e)      | 3-Fucosyllactose exchange                              | 3fuclac[e] <=>      | 1   |    | -1000 | 1000 | 0  | exchange/dem and reaction |           |       |           |
|                | EX_4abut(e)        | 4-Aminobutanoate exchange                              | 4abut[e] <=>        | 1   |    | -1000 | 1000 | 0  | exchange/dem and reaction |           |       |           |
|                | EX_7ocholate(e)    | alpha,12alpha-Dihydroxy-7-oxo-5beta-cholanate exchange | 7ocholate[e] <=>    | 1   |    | -1000 | 1000 | 0  | exchange/dem and reaction |           |       |           |
|                | EX_ac(e)           | Acetate exchange                                       | ac[e] <=>           | 1   |    | -1000 | 1000 | 0  | exchange/dem and reaction |           |       |           |
|                | EX_acerA(e)        | Aceric acid (3-C-carboxy-5-deoxy-l-xylose) exchange    | acerA[e] <=>        | 1   |    | -1000 | 1000 | 0  | exchange/dem and reaction |           |       |           |
|                | EX_acetol(e)       | Acetol exchange                                        | acetol[e] <=>       | 1   |    | -1000 | 1000 | 0  | exchange/dem and reaction |           |       |           |
|                | EX_acgal(e)        | N-Acetyl-D-galactosamine exchange                      | acgal[e] <=>        | 1   |    | -1000 | 1000 | 0  | exchange/dem and reaction |           |       |           |
|                | EX_acgalglcur(e)   | desulfated disaccharide acgalglcur exchange            | acgalglcur[e] <=>   | 1   |    | -1000 | 1000 | 0  | exchange/dem and reaction |           |       |           |
|                | EX_acgalidour(e)   | desulfated disaccharide acgalidour exchange            | acgalidour[e] <=>   | 1   |    | -1000 | 1000 | 0  | exchange/dem and reaction |           |       |           |
|                | EX_acgalidour2s(e) | partly desulfated disaccharide acgalidour exchange     | acgalidour2s[e] <=> | 1   |    | -1000 | 1000 | 0  | exchange/dem and reaction |           |       |           |
| EX_cpd00122(e) | EX_acgam(e)        | N-Acetyl-D-glucosamine exchange                        | acgam[e] <=>        | 1   |    | -1000 | 1000 | 0  | exchange/dem and reaction |           |       |           |
| EX_cpd00232(e) | EX_acnam(e)        | N-Acetylneuraminate exchange                           | acnam[e] <=>        | 1   |    | -1000 | 1000 | 0  | exchange/dem and reaction |           |       |           |
| EX_cpd00182(e) | EX_adn(e)          | Adenosine exchange                                     | adn[e] <=>          | 1   |    | -1000 | 1000 | 0  | exchange/dem and reaction |           |       |           |
|                | EX_adocbl(e)       | Adenosylcobalamin exchange                             | adocbl[e] <=>       | 1   |    | -1000 | 1000 | 0  | exchange/dem and reaction |           |       |           |
| EX_cpd00117(e) | EX_ala_D(e)        | D-Alanine exchange                                     | ala-D[e] <=>        | 1   |    | -1000 | 1000 | 0  | exchange/dem and reaction |           |       |           |
| EX_cpd00035(e) | EX_ala_L(e)        | L-Alanine exchange                                     | ala-L[e] <=>        | 1   |    | -1000 | 1000 | 0  | exchange/dem and reaction |           |       |           |
|                | EX_alaala(e)       | D-Alanyl-D-alanine exchange                            | alaala[e] <=>       | 1   |    | -1000 | 1000 | 0  | exchange/dem and reaction |           |       |           |
| EX_cpd11593(e) | EX_alaasp(e)       | L-alanyl-L-aspartate exchange                          | alaasp[e] <=>       | 1   |    | -1000 | 1000 | 0  | exchange/dem and reaction |           |       |           |
| EX_cpd11587(e) | EX_alagln(e)       | L-alanyl-L-glutamine exchange                          | alagln[e] <=>       | 1   |    | -1000 | 1000 | 0  | exchange/dem and reaction |           |       |           |
| EX_cpd11586(e) | EX_alaglu(e)       | L-alanyl-L-glutamate exchange                          | alaglu[e] <=>       | 1   |    | -1000 | 1000 | 0  | exchange/dem and reaction |           |       |           |

| SEED Rxn ID    | BIGG Rxn ID       | Function                        | Formula            | Rev | GA | LB    | UB   | CS | Subsystem                 | Reference | Notes | EC Number |
|----------------|-------------------|---------------------------------|--------------------|-----|----|-------|------|----|---------------------------|-----------|-------|-----------|
| EX_cpd11585(e) | EX_alagly(e)      | L-alanylglycine exchange        | alagly[e] <=>      | 1   |    | -1000 | 1000 | 0  | exchange/dem and reaction |           |       |           |
| EX_cpd11584(e) | EX_alahis(e)      | L-alanyl-L-histidine exchange   | alahis[e] <=>      | 1   |    | -1000 | 1000 | 0  | exchange/dem and reaction |           |       |           |
| EX_cpd11583(e) | EX_alaleu(e)      | L-alanyl-L-leucine exchange     | alaleu[e] <=>      | 1   |    | -1000 | 1000 | 0  | exchange/dem and reaction |           |       |           |
| EX_cpd11582(e) | EX_alathr(e)      | L-alanyl-L-threonine exchange   | alathr[e] <=>      | 1   |    | -1000 | 1000 | 0  | exchange/dem and reaction |           |       |           |
|                | EX_amannan140(e)  | Alpha-mannan exchange           | amannan140[e] <=>  | 1   |    | -1000 | 1000 | 0  | exchange/dem and reaction |           |       |           |
|                | EX_amylose300(e)  | Amylose exchange                | amylose300[e] <=>  | 1   |    | -1000 | 1000 | 0  | exchange/dem and reaction |           |       |           |
|                | EX_apio-D(e)      | D-apiose exchange               | apio-D[e] <=>      | 1   |    | -1000 | 1000 | 0  | exchange/dem and reaction |           |       |           |
| EX_cpd00224(e) | EX_arab_L(e)      | L-Arabinose exchange            | arab-L[e] <=>      | 1   |    | -1000 | 1000 | 0  | exchange/dem and reaction |           |       |           |
|                | EX_arabinan101(e) | Arabinan exchange               | arabinan101[e] <=> | 1   |    | -1000 | 1000 | 0  | exchange/dem and reaction |           |       |           |
|                | EX_arabinogal(e)  | Larch arabinogalactan exchange  | arabinogal[e] <=>  | 1   |    | -1000 | 1000 | 0  | exchange/dem and reaction |           |       |           |
|                | EX_arabtr(e)      | Arabinotriose exchange          | arabtr[e] <=>      | 1   |    | -1000 | 1000 | 0  | exchange/dem and reaction |           |       |           |
| EX_cpd00051(e) | EX_arg_L(e)       | L-Arginine exchange             | arg-L[e] <=>       | 1   |    | -1000 | 1000 | 0  | exchange/dem and reaction |           |       |           |
|                | EX_argarg(e)      | L-argininyl-L-arginine exchange | argarg[e] <=>      | 1   |    | -1000 | 1000 | 0  | exchange/dem and reaction |           |       |           |
|                | EX_asn_L(e)       | L-Asparagine exchange           | asn-L[e] <=>       | 1   |    | -1000 | 1000 | 0  | exchange/dem and reaction |           |       |           |
|                | EX_asp_L(e)       | L-Aspartate exchange            | asp-L[e] <=>       | 1   |    | -1000 | 1000 | 0  | exchange/dem and reaction |           |       |           |
| EX_cpd00104(e) | EX_btn(e)         | Biotin exchange                 | btn[e] <=>         | 1   |    | -1000 | 1000 | 0  | exchange/dem and reaction |           |       |           |
| EX_cpd00063(e) | EX_ca2(e)         | Calcium exchange                | ca2[e] <=>         | 1   |    | -1000 | 1000 | 0  | exchange/dem and reaction |           |       |           |
|                | EX_carn(e)        | Carnosine exchange              | carn[e] <=>        | 1   |    | -1000 | 1000 | 0  | exchange/dem and reaction |           |       |           |
| EX_cpd00635(e) | EX_cbl1(e)        | Cob(I)alamin exchange           | cbl1[e] <=>        | 1   |    | -1000 | 1000 | 0  | exchange/dem and reaction |           |       |           |
| EX_cpd01012(e) | EX_cd2(e)         | Cadmium exchange                | cd2[e] <=>         | 1   |    | -1000 | 1000 | 0  | exchange/dem and reaction |           |       |           |
| EX_cpd01017(e) | EX_cgly(e)        | Cys-Gly exchange                | cgly[e] <=>        | 1   |    | -1000 | 1000 | 0  | exchange/dem and reaction |           |       |           |
|                | EX_chtbs(e)       | Chitobiose exchange             | chtbs[e] <=>       | 1   |    | -1000 | 1000 | 0  | exchange/dem and reaction |           |       |           |

| SEED Rxn ID    | BIGG Rxn ID        | Function                                                      | Formula             | Rev | GA | LB    | UB   | CS | Subsystem                 | Reference | Notes | EC Number |
|----------------|--------------------|---------------------------------------------------------------|---------------------|-----|----|-------|------|----|---------------------------|-----------|-------|-----------|
| EX_cpd00137(e) | EX_cit(e)          | Citrate exchange                                              | cit[e] <=>          | 1   |    | -1000 | 1000 | 0  | exchange/dem and reaction |           |       |           |
| EX_cpd00099(e) | EX_cl(e)           | Chloride exchange                                             | cl[e] <=>           | 1   |    | -1000 | 1000 | 0  | exchange/dem and reaction |           |       |           |
| EX_cpd00011(e) | EX_co2(e)          | CO2 exchange                                                  | co2[e] <=>          | 1   |    | -1000 | 1000 | 0  | exchange/dem and reaction |           |       |           |
| EX_cpd00149(e) | EX_cobalt2(e)      | Co2+ exchange                                                 | cobalt2[e] <=>      | 1   |    | -1000 | 1000 | 0  | exchange/dem and reaction |           |       |           |
|                | EX_core2(e)        | Core2 (mucin O-glycan) exchange                               | core2[e] <=>        | 1   |    | -1000 | 1000 | 0  | exchange/dem and reaction |           |       |           |
|                | EX_core3(e)        | Core3 (mucin O-glycan) exchange                               | core3[e] <=>        | 1   |    | -1000 | 1000 | 0  | exchange/dem and reaction |           |       |           |
|                | EX_core4(e)        | Core4 (mucin O-glycan) exchange                               | core4[e] <=>        | 1   |    | -1000 | 1000 | 0  | exchange/dem and reaction |           |       |           |
|                | EX_core5(e)        | Core 5 exchange                                               | core5[e] <=>        | 1   |    | -1000 | 1000 | 0  | exchange/dem and reaction |           |       |           |
|                | EX_core6(e)        | Core6 (mucin O-glycan) exchange                               | core6[e] <=>        | 1   |    | -1000 | 1000 | 0  | exchange/dem and reaction |           |       |           |
|                | EX_core7(e)        | Core 7 exchange                                               | core7[e] <=>        | 1   |    | -1000 | 1000 | 0  | exchange/dem and reaction |           |       |           |
|                | EX_core8(e)        | Core 8 exchange                                               | core8[e] <=>        | 1   |    | -1000 | 1000 | 0  | exchange/dem and reaction |           |       |           |
|                | EX_cps_bt(e)       | Capsule polysaccharide (B.thetaiotaomicron specific) exchange | cps_bt[e] <=>       | 1   |    | -1000 | 1000 | 0  | exchange/dem and reaction |           |       |           |
|                | EX_cspg_a(e)       | Chondroitin sulfate A exchange                                | cspg_a[e] <=>       | 1   |    | -1000 | 1000 | 0  | exchange/dem and reaction |           |       |           |
|                | EX_cspg_a_degr(e)  | GalNAc4S-GlcA exchange                                        | cspg_a_degr[e] <=>  | 1   |    | -1000 | 1000 | 0  | exchange/dem and reaction |           |       |           |
|                | EX_cspg_ab_rest(e) | Chondroitin sulfate lyase AB degradation product exchange     | cspg_ab_rest[e] <=> | 1   |    | -1000 | 1000 | 0  | exchange/dem and reaction |           |       |           |
|                | EX_cspg_b(e)       | Chondroitin sulfate B exchange                                | cspg_b[e] <=>       | 1   |    | -1000 | 1000 | 0  | exchange/dem and reaction |           |       |           |
|                | EX_cspg_b_degr(e)  | GalNAc4S-IdoA2S exchange                                      | cspg_b_degr[e] <=>  | 1   |    | -1000 | 1000 | 0  | exchange/dem and reaction |           |       |           |
|                | EX_cspg_c(e)       | Chondroitin sulfate C exchange                                | cspg_c[e] <=>       | 1   |    | -1000 | 1000 | 0  | exchange/dem and reaction |           |       |           |
|                | EX_cspg_c_degr(e)  | GalNAc6S-GlcA exchange                                        | cspg_c_degr[e] <=>  | 1   |    | -1000 | 1000 | 0  | exchange/dem and reaction |           |       |           |
|                | EX_cspg_c_rest(e)  | Chondroitin sulfate lyase C degradation product exchange      | cspg_c_rest[e] <=>  | 1   |    | -1000 | 1000 | 0  | exchange/dem and reaction |           |       |           |
| EX_cpd08305(e) | EX_ctbt(e)         | Crotonobetaine exchange                                       | ctbt[e] <=>         | 1   |    | -1000 | 1000 | 0  | exchange/dem and reaction |           |       |           |

| SEED Rxn ID    | BIGG Rxn ID        | Function                                        | Formula             | Rev | GA | LB    | UB   | CS | Subsystem                 | Reference | Notes | EC Number |
|----------------|--------------------|-------------------------------------------------|---------------------|-----|----|-------|------|----|---------------------------|-----------|-------|-----------|
| EX_cpd00058(e) | EX_cu2(e)          | Cu2+ exchange                                   | cu2[e] <=>          | 1   |    | -1000 | 1000 | 0  | exchange/dem and reaction |           |       |           |
| EX_cpd00084(e) | EX_cys_L(e)        | L-Cysteine exchange                             | cys-L[e] <=>        | 1   |    | -1000 | 1000 | 0  | exchange/dem and reaction |           |       |           |
| EX_cpd00367(e) | EX_cyt(d)          | Cytidine exchange                               | cytd[e] <=>         | 1   |    | -1000 | 1000 | 0  | exchange/dem and reaction |           |       |           |
| EX_cpd00438(e) | EX_dad_2(e)        | Deoxyadenosine exchange                         | dad-2[e] <=>        | 1   |    | -1000 | 1000 | 0  | exchange/dem and reaction |           |       |           |
| EX_cpd00654(e) | EX_dcyt(e)         | Deoxycytidine exchange                          | dcyt[e] <=>         | 1   |    | -1000 | 1000 | 0  | exchange/dem and reaction |           |       |           |
|                | EX_dextran40(e)    | Dextran 40, (1,6-alpha-D-Glucan) exchange       | dextran40[e] <=>    | 1   |    | -1000 | 1000 | 0  | exchange/dem and reaction |           |       |           |
| EX_cpd00277(e) | EX_dgsn(e)         | Deoxyguanosine exchange                         | dgsn[e] <=>         | 1   |    | -1000 | 1000 | 0  | exchange/dem and reaction |           |       |           |
| EX_cpd03279(e) | EX_din(e)          | Deoxyinosine exchange                           | din[e] <=>          | 1   |    | -1000 | 1000 | 0  | exchange/dem and reaction |           |       |           |
|                | EX_dsT_antigen(e)  | disialyl-T antigen exchange                     | dsT_antigen[e] <=>  | 1   |    | -1000 | 1000 | 0  | exchange/dem and reaction |           |       |           |
|                | EX_dt5hsu(e)       | 5-Dehydro-4-deoxy-D-glucuronate exchange        | dt5hsu[e] <=>       | 1   |    | -1000 | 1000 | 0  | exchange/dem and reaction |           |       |           |
| EX_cpd00412(e) | EX_duri(e)         | Deoxyuridine exchange                           | duri[e] <=>         | 1   |    | -1000 | 1000 | 0  | exchange/dem and reaction |           |       |           |
|                | EX_etoh(e)         | Ethanol exchange                                | etoh[e] <=>         | 1   |    | -1000 | 1000 | 0  | exchange/dem and reaction |           |       |           |
|                | EX_f1a(e)          | F1alpha (mucin O-glycan) exchange               | f1a[e] <=>          | 1   |    | -1000 | 1000 | 0  | exchange/dem and reaction |           |       |           |
| EX_cpd10515(e) | EX_fe2(e)          | Fe2+ exchange                                   | fe2[e] <=>          | 1   |    | -1000 | 1000 | 0  | exchange/dem and reaction |           |       |           |
| EX_cpd10516(e) | EX_fe3(e)          | Fe3+ exchange                                   | fe3[e] <=>          | 1   |    | -1000 | 1000 | 0  | exchange/dem and reaction |           |       |           |
| EX_cpd03725(e) | EX_fe3dcit(e)      | Fe(III)dicitrate exchange                       | fe3dcit[e] <=>      | 1   |    | -1000 | 1000 | 0  | exchange/dem and reaction |           |       |           |
| EX_cpd00393(e) | EX_fol(e)          | Folate exchange                                 | fol[e] <=>          | 1   |    | -1000 | 1000 | 0  | exchange/dem and reaction |           |       |           |
| EX_cpd00047(e) | EX_for(e)          | Formate exchange                                | for[e] <=>          | 1   |    | -1000 | 1000 | 0  | exchange/dem and reaction |           |       |           |
| EX_cpd00082(e) | EX_fru(e)          | D-Fructose exchange                             | fru[e] <=>          | 1   |    | -1000 | 1000 | 0  | exchange/dem and reaction |           |       |           |
|                | EX_fuc_L(e)        | L-Fucose exchange                               | fuc-L[e] <=>        | 1   |    | -1000 | 1000 | 0  | exchange/dem and reaction |           |       |           |
|                | EX_fucneulacnhx(e) | Monofucosyl-monosialyl-lacto-N-hexaose exchange | fucneulacnhx[e] <=> | 1   |    | -1000 | 1000 | 0  | exchange/dem and reaction |           |       |           |
| EX_cpd00106(e) | EX_fum(e)          | Fumarate exchange                               | fum[e] <=>          | 1   |    | -1000 | 1000 | 0  | exchange/dem and reaction |           |       |           |

| SEED Rxn ID    | BIGG Rxn ID        | Function                                  | Formula             | Rev | GA | LB    | UB   | CS | Subsystem                 | Reference | Notes | EC Number |
|----------------|--------------------|-------------------------------------------|---------------------|-----|----|-------|------|----|---------------------------|-----------|-------|-----------|
| EX_cpd00108(e) | EX_gal(e)          | D-Galactose exchange                      | gal[e] <=>          | 1   |    | -1000 | 1000 | 0  | exchange/dem and reaction |           |       |           |
|                | EX_galam(e)        | Galactosamine exchange                    | galam[e] <=>        | 1   |    | -1000 | 1000 | 0  | exchange/dem and reaction |           |       |           |
| EX_cpd00280(e) | EX_galur(e)        | D-Galacturonate exchange                  | galur[e] <=>        | 1   |    | -1000 | 1000 | 0  | exchange/dem and reaction |           |       |           |
|                | EX_gam(e)          | D-Glucosamine exchange                    | gam[e] <=>          | 1   |    | -1000 | 1000 | 0  | exchange/dem and reaction |           |       |           |
|                | EX_gam26s(e)       | Glucosamine 2,6-sulfate exchange          | gam26s[e] <=>       | 1   |    | -1000 | 1000 | 0  | exchange/dem and reaction |           |       |           |
|                | EX_gchola(e)       | Glycocholate exchange                     | gchola[e] <=>       | 1   |    | -1000 | 1000 | 0  | exchange/dem and reaction |           |       |           |
| EX_cpd00027(e) | EX_glc(e)          | D-Glucose exchange                        | glc-D[e] <=>        | 1   |    | -1000 | 1000 | 0  | exchange/dem and reaction |           |       |           |
| EX_cpd00164(e) | EX_glcure(e)       | D-Glucuronate exchange                    | glcure[e] <=>       | 1   |    | -1000 | 1000 | 0  | exchange/dem and reaction |           |       |           |
| EX_cpd00053(e) | EX_gln_L(e)        | L-Glutamine exchange                      | gln-L[e] <=>        | 1   |    | -1000 | 1000 | 0  | exchange/dem and reaction |           |       |           |
| EX_cpd00023(e) | EX_glu_L(e)        | L-Glutamate exchange                      | glu-L[e] <=>        | 1   |    | -1000 | 1000 | 0  | exchange/dem and reaction |           |       |           |
| EX_cpd00033(e) | EX_gly(e)          | Glycine exchange                          | gly[e] <=>          | 1   |    | -1000 | 1000 | 0  | exchange/dem and reaction |           |       |           |
| EX_cpd11581(e) | EX_glyasn(e)       | Glycyl-L-asparagine exchange              | glyasn[e] <=>       | 1   |    | -1000 | 1000 | 0  | exchange/dem and reaction |           |       |           |
| EX_cpd11589(e) | EX_glyasp(e)       | Glycyl-L-aspartate exchange               | glyasp[e] <=>       | 1   |    | -1000 | 1000 | 0  | exchange/dem and reaction |           |       |           |
| EX_cpd00540(e) | EX_glyb(e)         | Glycine betaine exchange                  | glyb[e] <=>         | 1   |    | -1000 | 1000 | 0  | exchange/dem and reaction |           |       |           |
|                | EX_glycogen1500(e) | Glycogen exchange                         | glycogen1500[e] <=> | 1   |    | -1000 | 1000 | 0  | exchange/dem and reaction |           |       |           |
| EX_cpd11580(e) | EX_glygln(e)       | Glycyl-L-glutamine exchange               | glygln[e] <=>       | 1   |    | -1000 | 1000 | 0  | exchange/dem and reaction |           |       |           |
| EX_cpd11592(e) | EX_glyglu(e)       | Glycyl-L-glutamate exchange               | glyglu[e] <=>       | 1   |    | -1000 | 1000 | 0  | exchange/dem and reaction |           |       |           |
|                | EX_glygly(e)       | exchange reaction for glycylglycine       | glygly[e] <=>       | 1   |    | -1000 | 1000 | 0  | exchange/dem and reaction |           |       |           |
| EX_cpd15604(e) | EX_glyleu(e)       | Glycylleucine exchange                    | glyleu[e] <=>       | 1   |    | -1000 | 1000 | 0  | exchange/dem and reaction |           |       |           |
| EX_cpd11591(e) | EX_glymet(e)       | Glycyl-L-methionine exchange              | glymet[e] <=>       | 1   |    | -1000 | 1000 | 0  | exchange/dem and reaction |           |       |           |
| EX_cpd15605(e) | EX_glyphe(e)       | exchange reaction for glycylphenylalanine | glyphe[e] <=>       | 1   |    | -1000 | 1000 | 0  | exchange/dem and reaction |           |       |           |
| EX_cpd11588(e) | EX_glypro(e)       | Glycylproline exchange                    | glypro[e] <=>       | 1   |    | -1000 | 1000 | 0  | exchange/dem and reaction |           |       |           |

| SEED Rxn ID    | BIGG Rxn ID        | Function                                                     | Formula             | Rev | GA | LB    | UB   | CS | Subsystem                 | Reference | Notes | EC Number |
|----------------|--------------------|--------------------------------------------------------------|---------------------|-----|----|-------|------|----|---------------------------|-----------|-------|-----------|
| EX_cpd15606(e) | EX_glytyr(e)       | Glycyl-L-tyrosine exchange                                   | glytyr[e] <=>       | 1   |    | -1000 | 1000 | 0  | exchange/dem and reaction |           |       |           |
|                | EX_gncore1(e)      | gncore1 (mucin O-glycan) exchange                            | gncore1[e] <=>      | 1   |    | -1000 | 1000 | 0  | exchange/dem and reaction |           |       |           |
|                | EX_gncore2(e)      | GlcNAc-alpha-1,4-Core 2 exchange                             | gncore2[e] <=>      | 1   |    | -1000 | 1000 | 0  | exchange/dem and reaction |           |       |           |
| EX_cpd00311(e) | EX_gsn(e)          | Guanosine exchange                                           | gsn[e] <=>          | 1   |    | -1000 | 1000 | 0  | exchange/dem and reaction |           |       |           |
| EX_cpd00067(e) | EX_h(e)            | H+ exchange                                                  | h[e] <=>            | 1   |    | -1000 | 1000 | 0  | exchange/dem and reaction |           |       |           |
|                | EX_h2(e)           | H2 exchange                                                  | h2[e] <=>           | 1   |    | -1000 | 1000 | 0  | exchange/dem and reaction |           |       |           |
| EX_cpd00001(e) | EX_h2o(e)          | H2O exchange                                                 | h2o[e] <=>          | 1   |    | -1000 | 1000 | 0  | exchange/dem and reaction |           |       |           |
|                | EX_h2s(e)          | Hydrogen sulfide exchange                                    | h2s[e] <=>          | 1   |    | -1000 | 1000 | 0  | exchange/dem and reaction |           |       |           |
|                | EX_ha(e)           | hyaluronan exchange                                          | ha[e] <=>           | 1   |    | -1000 | 1000 | 0  | exchange/dem and reaction |           |       |           |
|                | EX_ha_deg1(e)      | hyaluronan degradation product 1 exchange                    | ha_deg1[e] <=>      | 1   |    | -1000 | 1000 | 0  | exchange/dem and reaction |           |       |           |
|                | EX_ha_pre1(e)      | hyaluronan biosynthesis, precursor 1 exchange                | ha_pre1[e] <=>      | 1   |    | -1000 | 1000 | 0  | exchange/dem and reaction |           |       |           |
| EX_cpd00531(e) | EX_hg2(e)          | Hg2+ exchange                                                | hg2[e] <=>          | 1   |    | -1000 | 1000 | 0  | exchange/dem and reaction |           |       |           |
| EX_cpd00119(e) | EX_his_L(e)        | L-Histidine exchange                                         | his-L[e] <=>        | 1   |    | -1000 | 1000 | 0  | exchange/dem and reaction |           |       |           |
|                | EX_homogal(e)      | Homogalacturonan exchange                                    | homogal[e] <=>      | 1   |    | -1000 | 1000 | 0  | exchange/dem and reaction |           |       |           |
|                | EX_hspg(e)         | heparan sulfate proteoglycan exchange                        | hspg[e] <=>         | 1   |    | -1000 | 1000 | 0  | exchange/dem and reaction |           |       |           |
|                | EX_hspg_degr_1(e)  | heparan sulfate proteoglycan degradation product 1 exchange  | hspg_degr_1[e] <=>  | 1   |    | -1000 | 1000 | 0  | exchange/dem and reaction |           |       |           |
|                | EX_hspg_degr_10(e) | heparan sulfate proteoglycan degradation product 10 exchange | hspg_degr_10[e] <=> | 1   |    | -1000 | 1000 | 0  | exchange/dem and reaction |           |       |           |
|                | EX_hspg_degr_11(e) | heparan sulfate proteoglycan degradation product 11 exchange | hspg_degr_11[e] <=> | 1   |    | -1000 | 1000 | 0  | exchange/dem and reaction |           |       |           |

| SEED Rxn ID | BIGG Rxn ID        | Function                                                     | Formula                | Rev | GA | LB    | UB   | CS | Subsystem                 | Reference | Notes | EC Number |
|-------------|--------------------|--------------------------------------------------------------|------------------------|-----|----|-------|------|----|---------------------------|-----------|-------|-----------|
|             | EX_hspg_degr_12(e) | heparan sulfate proteoglycan degradation product 12 exchange | hspg_degr_12[e]<br><=> | 1   |    | -1000 | 1000 | 0  | exchange/dem and reaction |           |       |           |
|             | EX_hspg_degr_13(e) | heparan sulfate proteoglycan degradation product 13 exchange | hspg_degr_13[e]<br><=> | 1   |    | -1000 | 1000 | 0  | exchange/dem and reaction |           |       |           |
|             | EX_hspg_degr_14(e) | heparan sulfate proteoglycan degradation product 14 exchange | hspg_degr_14[e]<br><=> | 1   |    | -1000 | 1000 | 0  | exchange/dem and reaction |           |       |           |
|             | EX_hspg_degr_15(e) | heparan sulfate proteoglycan degradation product 15 exchange | hspg_degr_15[e]<br><=> | 1   |    | -1000 | 1000 | 0  | exchange/dem and reaction |           |       |           |
|             | EX_hspg_degr_2(e)  | heparan sulfate proteoglycan degradation product 2 exchange  | hspg_degr_2[e]<br><=>  | 1   |    | -1000 | 1000 | 0  | exchange/dem and reaction |           |       |           |
|             | EX_hspg_degr_3(e)  | heparan sulfate proteoglycan degradation product 3 exchange  | hspg_degr_3[e]<br><=>  | 1   |    | -1000 | 1000 | 0  | exchange/dem and reaction |           |       |           |
|             | EX_hspg_degr_4(e)  | heparan sulfate proteoglycan degradation product 4 exchange  | hspg_degr_4[e]<br><=>  | 1   |    | -1000 | 1000 | 0  | exchange/dem and reaction |           |       |           |
|             | EX_hspg_degr_5(e)  | heparan sulfate proteoglycan degradation product 5 exchange  | hspg_degr_5[e]<br><=>  | 1   |    | -1000 | 1000 | 0  | exchange/dem and reaction |           |       |           |
|             | EX_hspg_degr_6(e)  | heparan sulfate proteoglycan degradation product 6 exchange  | hspg_degr_6[e]<br><=>  | 1   |    | -1000 | 1000 | 0  | exchange/dem and reaction |           |       |           |
|             | EX_hspg_degr_7(e)  | heparan sulfate proteoglycan degradation product 7 exchange  | hspg_degr_7[e]<br><=>  | 1   |    | -1000 | 1000 | 0  | exchange/dem and reaction |           |       |           |
|             | EX_hspg_degr_8(e)  | heparan sulfate proteoglycan degradation product 8 exchange  | hspg_degr_8[e]<br><=>  | 1   |    | -1000 | 1000 | 0  | exchange/dem and reaction |           |       |           |

| SEED Rxn ID    | BIGG Rxn ID       | Function                                                                           | Formula            | Rev | GA | LB    | UB   | CS | Subsystem                 | Reference | Notes | EC Number |
|----------------|-------------------|------------------------------------------------------------------------------------|--------------------|-----|----|-------|------|----|---------------------------|-----------|-------|-----------|
|                | EX_hspg_degr_9(e) | heparan sulfate proteoglycan degradation product 9 exchange                        | hspg_degr_9[e] <=> | 1   |    | -1000 | 1000 | 0  | exchange/dem and reaction |           |       |           |
|                | EX_hspg_rest(e)   | hspg_undegradable_rest exchange                                                    | hspg_rest[e] <=>   | 1   |    | -1000 | 1000 | 0  | exchange/dem and reaction |           |       |           |
|                | EX_idour(e)       | Iduronate exchange                                                                 | idour[e] <=>       | 1   |    | -1000 | 1000 | 0  | exchange/dem and reaction |           |       |           |
| EX_cpd00322(e) | EX_ile_L(e)       | L-Isoleucine exchange                                                              | ile-L[e] <=>       | 1   |    | -1000 | 1000 | 0  | exchange/dem and reaction |           |       |           |
| EX_cpd00246(e) | EX_ins(e)         | Inosine exchange                                                                   | ins[e] <=>         | 1   |    | -1000 | 1000 | 0  | exchange/dem and reaction |           |       |           |
|                | EX_inulin(e)      | Inulin exchange                                                                    | inulin[e] <=>      | 1   |    | -1000 | 1000 | 0  | exchange/dem and reaction |           |       |           |
|                | EX_isobut(e)      | Isobutyrate exchange                                                               | isobut[e] <=>      | 1   |    | -1000 | 1000 | 0  | exchange/dem and reaction |           |       |           |
|                | EX_isocapr(e)     | Isocaproate exchange                                                               | isocapr[e] <=>     | 1   |    | -1000 | 1000 | 0  | exchange/dem and reaction |           |       |           |
|                | EX_isoal(e)       | Isovalerate exchange                                                               | isoal[e] <=>       | 1   |    | -1000 | 1000 | 0  | exchange/dem and reaction |           |       |           |
| EX_cpd00205(e) | EX_k(e)           | K+ exchange                                                                        | k[e] <=>           | 1   |    | -1000 | 1000 | 0  | exchange/dem and reaction |           |       |           |
|                | EX_kdo(e)         | 3-Deoxy-D-manno-2-octulosonate exchange                                            | kdo[e] <=>         | 1   |    | -1000 | 1000 | 0  | exchange/dem and reaction |           |       |           |
|                | EX_kest(e)        | Kestose exchange                                                                   | kesto[e] <=>       | 1   |    | -1000 | 1000 | 0  | exchange/dem and reaction |           |       |           |
|                | EX_kestopt(e)     | Kestopentaose exchange                                                             | kestopt[e] <=>     | 1   |    | -1000 | 1000 | 0  | exchange/dem and reaction |           |       |           |
|                | EX_kestottr(e)    | Kestotetraose exchange                                                             | kestottr[e] <=>    | 1   |    | -1000 | 1000 | 0  | exchange/dem and reaction |           |       |           |
|                | EX_l2n2m2mn(e)    | de-Fuc, reducing GlcNAc removed, de-Sia form of PA6 (w/o peptide linkage) exchange | l2n2m2mn[e] <=>    | 1   |    | -1000 | 1000 | 0  | exchange/dem and reaction |           |       |           |
| EX_cpd00221(e) | EX_lac_D(e)       | D-lactate exchange                                                                 | lac-D[e] <=>       | 1   |    | -1000 | 1000 | 0  | exchange/dem and reaction |           |       |           |
| EX_cpd00159(e) | EX_lac_L(e)       | L-Lactate exchange                                                                 | lac-L[e] <=>       | 1   |    | -1000 | 1000 | 0  | exchange/dem and reaction |           |       |           |
|                | EX_lacdfucttr(e)  | Lactodifucotetraose exchange                                                       | lacdfucttr[e] <=>  | 1   |    | -1000 | 1000 | 0  | exchange/dem and reaction |           |       |           |
|                | EX_lacndfuchx(e)  | Lacto-N-difucohexaose exchange                                                     | lacndfuchx[e] <=>  | 1   |    | -1000 | 1000 | 0  | exchange/dem and reaction |           |       |           |
|                | EX_lacnfucpt(e)   | Lacto-N-fucopentaose exchange                                                      | lacnfucpt[e] <=>   | 1   |    | -1000 | 1000 | 0  | exchange/dem and reaction |           |       |           |

| SEED Rxn ID    | BIGG Rxn ID     | Function                                                         | Formula          | Rev | GA | LB    | UB   | CS | Subsystem                 | Reference | Notes | EC Number |
|----------------|-----------------|------------------------------------------------------------------|------------------|-----|----|-------|------|----|---------------------------|-----------|-------|-----------|
|                | EX_lacnnttr(e)  | Lacto-N-neotetraose exchange                                     | lacnnttr[e] <=>  | 1   |    | -1000 | 1000 | 0  | exchange/dem and reaction |           |       |           |
|                | EX_lacnttr(e)   | Lacto-N-tetraose exchange                                        | lacnttr[e] <=>   | 1   |    | -1000 | 1000 | 0  | exchange/dem and reaction |           |       |           |
| EX_cpd00208(e) | EX_lcts(e)      | Lactose exchange                                                 | lcts[e] <=>      | 1   |    | -1000 | 1000 | 0  | exchange/dem and reaction |           |       |           |
| EX_cpd00107(e) | EX_leu_L(e)     | L-Leucine exchange                                               | leu-L[e] <=>     | 1   |    | -1000 | 1000 | 0  | exchange/dem and reaction |           |       |           |
|                | EX_leugly(e)    | exchange reaction for leucylglycine                              | leugly[e] <=>    | 1   |    | -1000 | 1000 | 0  | exchange/dem and reaction |           |       |           |
|                | EX_leuleu(e)    | Leucylleucine exchange                                           | leuleu[e] <=>    | 1   |    | -1000 | 1000 | 0  | exchange/dem and reaction |           |       |           |
|                | EX_levan1000(e) | Levan exchange                                                   | levan1000[e] <=> | 1   |    | -1000 | 1000 | 0  | exchange/dem and reaction |           |       |           |
|                | EX_levanb(e)    | Levanbiose exchange                                              | levanb[e] <=>    | 1   |    | -1000 | 1000 | 0  | exchange/dem and reaction |           |       |           |
|                | EX_levanttr(e)  | Levantriose exchange                                             | levanttr[e] <=>  | 1   |    | -1000 | 1000 | 0  | exchange/dem and reaction |           |       |           |
|                | EX_levantttr(e) | Levantetraose exchange                                           | levantttr[e] <=> | 1   |    | -1000 | 1000 | 0  | exchange/dem and reaction |           |       |           |
|                | EX_lmn2(e)      | Laminaribiose exchange                                           | lmn2[e] <=>      | 1   |    | -1000 | 1000 | 0  | exchange/dem and reaction |           |       |           |
|                | EX_lmn30(e)     | Laminarin exchange                                               | lmn30[e] <=>     | 1   |    | -1000 | 1000 | 0  | exchange/dem and reaction |           |       |           |
|                | EX_lps_bt(e)    | Lipopolysaccharide exchange                                      | lps_bt[e] <=>    | 1   |    | -1000 | 1000 | 0  | exchange/dem and reaction |           |       |           |
| EX_cpd00039(e) | EX_lys_L(e)     | L-Lysine exchange                                                | lys-L[e] <=>     | 1   |    | -1000 | 1000 | 0  | exchange/dem and reaction |           |       |           |
|                | EX_m2mn(e)      | (alpha-D-mannosyl)2-beta-D-mannosyl-N-acetylglucosamine exchange | m2mn[e] <=>      | 1   |    | -1000 | 1000 | 0  | exchange/dem and reaction |           |       |           |
| EX_cpd00179(e) | EX_malt(e)      | Maltose exchange                                                 | malt[e] <=>      | 1   |    | -1000 | 1000 | 0  | exchange/dem and reaction |           |       |           |
|                | EX_malthp(e)    | Maltoheptaose exchange                                           | malthp[e] <=>    | 1   |    | -1000 | 1000 | 0  | exchange/dem and reaction |           |       |           |
| EX_cpd01329(e) | EX_malthx(e)    | Maltohexaose exchange                                            | malthx[e] <=>    | 1   |    | -1000 | 1000 | 0  | exchange/dem and reaction |           |       |           |
|                | EX_maltpt(e)    | Maltopentaose exchange                                           | maltpt[e] <=>    | 1   |    | -1000 | 1000 | 0  | exchange/dem and reaction |           |       |           |
| EX_cpd01262(e) | EX_malttr(e)    | Maltotriose exchange                                             | malttr[e] <=>    | 1   |    | -1000 | 1000 | 0  | exchange/dem and reaction |           |       |           |
|                | EX_maltttr(e)   | Maltotetraose exchange                                           | maltttr[e] <=>   | 1   |    | -1000 | 1000 | 0  | exchange/dem and reaction |           |       |           |

| SEED Rxn ID    | BIGG Rxn ID  | Function                                                                                   | Formula       | Rev | GA | LB    | UB   | CS | Subsystem                 | Reference | Notes | EC Number |
|----------------|--------------|--------------------------------------------------------------------------------------------|---------------|-----|----|-------|------|----|---------------------------|-----------|-------|-----------|
| EX_cpd00138(e) | EX_man(e)    | D-Mannose exchange                                                                         | man[e] <=>    | 1   |    | -1000 | 1000 | 0  | exchange/dem and reaction |           |       |           |
|                | EX_manb(e)   | Mannobiose exchange                                                                        | manb[e] <=>   | 1   |    | -1000 | 1000 | 0  | exchange/dem and reaction |           |       |           |
|                | EX_manpt(e)  | Mannopentaose exchange                                                                     | manpt[e] <=>  | 1   |    | -1000 | 1000 | 0  | exchange/dem and reaction |           |       |           |
|                | EX_mantr(e)  | Mannotriose exchange                                                                       | mantr[e] <=>  | 1   |    | -1000 | 1000 | 0  | exchange/dem and reaction |           |       |           |
|                | EX_mantr(e)  | Mannotetraose exchange                                                                     | mantr[e] <=>  | 1   |    | -1000 | 1000 | 0  | exchange/dem and reaction |           |       |           |
| EX_cpd03198(e) | EX_melib(e)  | Melibiose exchange                                                                         | melib[e] <=>  | 1   |    | -1000 | 1000 | 0  | exchange/dem and reaction |           |       |           |
|                | EX_meoh(e)   | methanol exchange                                                                          | meoh[e] <=>   | 1   |    | -1000 | 1000 | 0  | exchange/dem and reaction |           |       |           |
| EX_cpd00060(e) | EX_met_L(e)  | L-Methionine exchange                                                                      | met-L[e] <=>  | 1   |    | -1000 | 1000 | 0  | exchange/dem and reaction |           |       |           |
| EX_cpd11590(e) | EX_metala(e) | L-methionyl-L-alanine exchange                                                             | metala[e] <=> | 1   |    | -1000 | 1000 | 0  | exchange/dem and reaction |           |       |           |
| EX_cpd00254(e) | EX_mg2(e)    | Mg exchange                                                                                | mg2[e] <=>    | 1   |    | -1000 | 1000 | 0  | exchange/dem and reaction |           |       |           |
|                | EX_mn(e)     | beta-1,4-mannose-N-acetylglucosamine exchange                                              | mn[e] <=>     | 1   |    | -1000 | 1000 | 0  | exchange/dem and reaction |           |       |           |
| EX_cpd00030(e) | EX_mn2(e)    | Mn2+ exchange                                                                              | mn2[e] <=>    | 1   |    | -1000 | 1000 | 0  | exchange/dem and reaction |           |       |           |
|                | EX_mqn10(e)  | Menaquinone 10 exchange                                                                    | mqn10[e] <=>  | 1   |    | -1000 | 1000 | 0  | exchange/dem and reaction |           |       |           |
|                | EX_mqn11(e)  | Menaquinone 11 exchange                                                                    | mqn11[e] <=>  | 1   |    | -1000 | 1000 | 0  | exchange/dem and reaction |           |       |           |
|                | EX_mqn7(e)   | Menaquinone 7 exchange                                                                     | mqn7[e] <=>   | 1   |    | -1000 | 1000 | 0  | exchange/dem and reaction |           |       |           |
|                | EX_mqn8(e)   | Menaquinone 8 exchange                                                                     | mqn8[e] <=>   | 1   |    | -1000 | 1000 | 0  | exchange/dem and reaction |           |       |           |
|                | EX_mqn9(e)   | Menaquinone 9 exchange                                                                     | mqn9[e] <=>   | 1   |    | -1000 | 1000 | 0  | exchange/dem and reaction |           |       |           |
|                | EX_mthgxl(e) | Methylglyoxal exchange                                                                     | mthgxl[e] <=> | 1   |    | -1000 | 1000 | 0  | exchange/dem and reaction |           |       |           |
|                | EX_n2m2mn(e) | de-Fuc, reducing GlcNAc removed, de-Sia, de-Gal form of PA6 (w/o peptide linkage) exchange | n2m2mn[e] <=> | 1   |    | -1000 | 1000 | 0  | exchange/dem and reaction |           |       |           |
| EX_cpd00971(e) | EX_na1(e)    | Sodium exchange                                                                            | na1[e] <=>    | 1   |    | -1000 | 1000 | 0  | exchange/dem and reaction |           |       |           |

| SEED Rxn ID    | BIGG Rxn ID      | Function                                                            | Formula           | Rev | GA | LB    | UB   | CS | Subsystem                 | Reference | Notes | EC Number |
|----------------|------------------|---------------------------------------------------------------------|-------------------|-----|----|-------|------|----|---------------------------|-----------|-------|-----------|
|                | EX_nac(e)        | Nicotinate exchange                                                 | nac[e] <=>        | 1   |    | -1000 | 1000 | 0  | exchange/dem and reaction |           |       |           |
|                | EX_neulacntr(e)  | Sialyllacto-N-tetraose exchange                                     | neulacntr[e] <=>  | 1   |    | -1000 | 1000 | 0  | exchange/dem and reaction |           |       |           |
| EX_cpd00013(e) | EX_nh4(e)        | Ammonia exchange                                                    | nh4[e] <=>        | 1   |    | -1000 | 1000 | 0  | exchange/dem and reaction |           |       |           |
|                | EX_nmn(e)        | NMN exchange                                                        | nmn[e] <=>        | 1   |    | -1000 | 1000 | 0  | exchange/dem and reaction |           |       |           |
| EX_cpd00075(e) | EX_no2(e)        | Nitrite exchange                                                    | no2[e] <=>        | 1   |    | -1000 | 1000 | 0  | exchange/dem and reaction |           |       |           |
| EX_cpd00007(e) | EX_o2(e)         | O2 exchange                                                         | o2[e] <=>         | 1   |    | -1000 | 1000 | 0  | exchange/dem and reaction |           |       |           |
|                | EX_oligofru4(e)  | Oligofructose exchange                                              | oligofru4[e] <=>  | 1   |    | -1000 | 1000 | 0  | exchange/dem and reaction |           |       |           |
|                | EX_orn(e)        | Ornithine exchange                                                  | orn[e] <=>        | 1   |    | -1000 | 1000 | 0  | exchange/dem and reaction |           |       |           |
|                | EX_pac(e)        | Phenylacetic acid exchange                                          | pac[e] <=>        | 1   |    | -1000 | 1000 | 0  | exchange/dem and reaction |           |       |           |
|                | EX_pb(e)         | Lead exchange                                                       | pb[e] <=>         | 1   |    | -1000 | 1000 | 0  | exchange/dem and reaction |           |       |           |
|                | EX_pe_cer1_BT(e) | Ceramide phosphoethanolamine (B.thetaiotaomicron specific) exchange | pe_cer1_bt[e] <=> | 1   |    | -1000 | 1000 | 0  | exchange/dem and reaction |           |       |           |
|                | EX_pect(e)       | exchange reaction for pectins                                       | pect[e] <=>       | 1   |    | -1000 | 1000 | 0  | exchange/dem and reaction |           |       |           |
|                | EX_pecticgal(e)  | Pectic galactan (potato) exchange                                   | pecticgal[e] <=>  | 1   |    | -1000 | 1000 | 0  | exchange/dem and reaction |           |       |           |
| EX_cpd00066(e) | EX_phe_L(e)      | L-Phenylalanine exchange                                            | phe-L[e] <=>      | 1   |    | -1000 | 1000 | 0  | exchange/dem and reaction |           |       |           |
|                | EX_phearg(e)     | L-phenylalanyl-L-arginine exchange                                  | phearg[e] <=>     | 1   |    | -1000 | 1000 | 0  | exchange/dem and reaction |           |       |           |
|                | EX_pheme(e)      | Protoheme exchange                                                  | pheme[e] <=>      | 1   |    | -1000 | 1000 | 0  | exchange/dem and reaction |           |       |           |
| EX_cpd00009(e) | EX_pi(e)         | Phosphate exchange                                                  | pi[e] <=>         | 1   |    | -1000 | 1000 | 0  | exchange/dem and reaction |           |       |           |
| EX_cpd00644(e) | EX_pnto_R(e)     | (R)-Pantothenate exchange                                           | pnto-R[e] <=>     | 1   |    | -1000 | 1000 | 0  | exchange/dem and reaction |           |       |           |
|                | EX_ppa(e)        | Propionate exchange                                                 | ppa[e] <=>        | 1   |    | -1000 | 1000 | 0  | exchange/dem and reaction |           |       |           |
| EX_cpd00129(e) | EX_pro_L(e)      | L-Proline exchange                                                  | pro-L[e] <=>      | 1   |    | -1000 | 1000 | 0  | exchange/dem and reaction |           |       |           |
|                | EX_progly(e)     | L-Prolinylglycine exchange                                          | progly[e] <=>     | 1   |    | -1000 | 1000 | 0  | exchange/dem and reaction |           |       |           |

| SEED Rxn ID    | BIGG Rxn ID         | Function                                                                   | Formula              | Rev | GA | LB    | UB   | CS | Subsystem                 | Reference | Notes | EC Number |
|----------------|---------------------|----------------------------------------------------------------------------|----------------------|-----|----|-------|------|----|---------------------------|-----------|-------|-----------|
| EX_cpd00118(e) | EX_ptrc(e)          | Putrescine exchange                                                        | ptrc[e] <=>          | 1   |    | -1000 | 1000 | 0  | exchange/dem and reaction |           |       |           |
|                | EX_pullulan1200(e)  | Pullulan exchange                                                          | pullulan1200[e] <=>  | 1   |    | -1000 | 1000 | 0  | exchange/dem and reaction |           |       |           |
|                | EX_pydxn(e)         | Pyridoxine exchange                                                        | pydxn[e] <=>         | 1   |    | -1000 | 1000 | 0  | exchange/dem and reaction |           |       |           |
|                | EX_pyr(e)           | Pyruvate exchange                                                          | pyr[e] <=>           | 1   |    | -1000 | 1000 | 0  | exchange/dem and reaction |           |       |           |
|                | EX_raffin(e)        | Raffinose exchange                                                         | raffin[e] <=>        | 1   |    | -1000 | 1000 | 0  | exchange/dem and reaction |           |       |           |
|                | EX_rhamnogalurI(e)  | Rhamnogalacturonan I exchange                                              | rhamnogalurI[e] <=>  | 1   |    | -1000 | 1000 | 0  | exchange/dem and reaction |           |       |           |
|                | EX_rhamnogalurII(e) | Rhamnogalacturonan II exchange                                             | rhamnogalurII[e] <=> | 1   |    | -1000 | 1000 | 0  | exchange/dem and reaction |           |       |           |
|                | EX_rib_D(e)         | D-Ribose exchange                                                          | rib-D[e] <=>         | 1   |    | -1000 | 1000 | 0  | exchange/dem and reaction |           |       |           |
| EX_cpd00220(e) | EX_ribflv(e)        | Riboflavin exchange                                                        | ribflv[e] <=>        | 1   |    | -1000 | 1000 | 0  | exchange/dem and reaction |           |       |           |
| EX_cpd00396(e) | EX_rmn(e)           | L-Rhamnose exchange                                                        | rmn[e] <=>           | 1   |    | -1000 | 1000 | 0  | exchange/dem and reaction |           |       |           |
|                | EX_s2l2fn2m2masn(e) | PA6 exchange                                                               | s2l2fn2m2masn[e] <=> | 1   |    | -1000 | 1000 | 0  | exchange/dem and reaction |           |       |           |
|                | EX_s2l2n2m2m(e)     | de-Fuc form of PA6 (w/o peptide linkage) exchange                          | s2l2n2m2m[e] <=>     | 1   |    | -1000 | 1000 | 0  | exchange/dem and reaction |           |       |           |
|                | EX_s2l2n2m2masn(e)  | de-Fuc form of PA6 exchange                                                | s2l2n2m2masn[e] <=>  | 1   |    | -1000 | 1000 | 0  | exchange/dem and reaction |           |       |           |
|                | EX_s2l2n2m2mn(e)    | de-Fuc, reducing GlcNAc removed form of PA6 (w/o peptide linkage) exchange | s2l2n2m2mn[e] <=>    | 1   |    | -1000 | 1000 | 0  | exchange/dem and reaction |           |       |           |
| EX_cpd00054(e) | EX_ser_L(e)         | L-Serine exchange                                                          | ser-L[e] <=>         | 1   |    | -1000 | 1000 | 0  | exchange/dem and reaction |           |       |           |
|                | EX_Ser_Thr(e)       | protein-linked serine or threonine residue (O-glycosylation site) exchange | Ser_Thr[e] <=>       | 1   |    | -1000 | 1000 | 0  | exchange/dem and reaction |           |       |           |
| EX_cpd00048(e) | EX_so4(e)           | Sulfate exchange                                                           | so4[e] <=>           | 1   |    | -1000 | 1000 | 0  | exchange/dem and reaction |           |       |           |
|                | EX_sphmyln_BT(e)    | Sphingomyelin (B.thetaiotaomicron specific) exchange                       | sphmyln_bt[e] <=>    | 1   |    | -1000 | 1000 | 0  | exchange/dem and reaction |           |       |           |
| EX_cpd00264(e) | EX_spmd(e)          | Spermidine exchange                                                        | spmd[e] <=>          | 1   |    | -1000 | 1000 | 0  | exchange/dem and reaction |           |       |           |

| SEED Rxn ID    | BIGG Rxn ID       | Function                                                                                    | Formula            | Rev | GA | LB    | UB   | CS | Subsystem                 | Reference | Notes | EC Number |
|----------------|-------------------|---------------------------------------------------------------------------------------------|--------------------|-----|----|-------|------|----|---------------------------|-----------|-------|-----------|
|                | EX_sT_antigen(e)  | sT_antigen (mucin O-glycan) exchange                                                        | sT_antigen[e] <=>  | 1   |    | -1000 | 1000 | 0  | exchange/dem and reaction |           |       |           |
|                | EX_starch1200(e)  | Starch exchange                                                                             | starch1200[e] <=>  | 1   |    | -1000 | 1000 | 0  | exchange/dem and reaction |           |       |           |
|                | EX_sTn_antigen(e) | sialyl-Tn antigen exchange                                                                  | sTn_antigen[e] <=> | 1   |    | -1000 | 1000 | 0  | exchange/dem and reaction |           |       |           |
|                | EX_strch1(e)      | starch, structure 1 (1,6-{7[1,4-Glc], 4[1,4-Glc]}) exchange                                 | strch1[e] <=>      | 1   |    | -1000 | 1000 | 0  | exchange/dem and reaction |           |       |           |
|                | EX_strch2(e)      | starch, structure 2 (1,6-{2[1,4-Glc], [1,4-Glc]}) exchange                                  | strch2[e] <=>      | 1   |    | -1000 | 1000 | 0  | exchange/dem and reaction |           |       |           |
|                | EX_stys(e)        | Stachyose exchange                                                                          | stys[e] <=>        | 1   |    | -1000 | 1000 | 0  | exchange/dem and reaction |           |       |           |
| EX_cpd00036(e) | EX_succ(e)        | Succinate exchange                                                                          | succ[e] <=>        | 1   |    | -1000 | 1000 | 0  | exchange/dem and reaction |           |       |           |
| EX_cpd00076(e) | EX_sucr(e)        | Sucrose exchange                                                                            | sucr[e] <=>        | 1   |    | -1000 | 1000 | 0  | exchange/dem and reaction |           |       |           |
|                | EX_T_antigen(e)   | T antigen (core 1) exchange                                                                 | T_antigen[e] <=>   | 1   |    | -1000 | 1000 | 0  | exchange/dem and reaction |           |       |           |
| EX_cpd00210(e) | EX_taur(e)        | Taurine exchange                                                                            | taur[e] <=>        | 1   |    | -1000 | 1000 | 0  | exchange/dem and reaction |           |       |           |
|                | EX_tchola(e)      | Taurocholate exchange                                                                       | tchola[e] <=>      | 1   |    | -1000 | 1000 | 0  | exchange/dem and reaction |           |       |           |
| EX_cpd00305(e) | EX_thm(e)         | Thiamin exchange                                                                            | thm[e] <=>         | 1   |    | -1000 | 1000 | 0  | exchange/dem and reaction |           |       |           |
|                | EX_thr_L(e)       | L-Threonine exchange                                                                        | thr-L[e] <=>       | 1   |    | -1000 | 1000 | 0  | exchange/dem and reaction |           |       |           |
| EX_cpd00184(e) | EX_thymd(e)       | Thymidine exchange                                                                          | thymd[e] <=>       | 1   |    | -1000 | 1000 | 0  | exchange/dem and reaction |           |       |           |
|                | EX_Tn_antigen(e)  | Tn_antigen (mucin O-glycan) exchange                                                        | Tn_antigen[e] <=>  | 1   |    | -1000 | 1000 | 0  | exchange/dem and reaction |           |       |           |
| EX_cpd00794(e) | EX_tre(e)         | Trehalose exchange                                                                          | tre[e] <=>         | 1   |    | -1000 | 1000 | 0  | exchange/dem and reaction |           |       |           |
| EX_cpd00065(e) | EX_trp_L(e)       | L-Tryptophan exchange                                                                       | trp-L[e] <=>       | 1   |    | -1000 | 1000 | 0  | exchange/dem and reaction |           |       |           |
| EX_cpd00069(e) | EX_tyr_L(e)       | L-Tyrosine exchange                                                                         | tyr-L[e] <=>       | 1   |    | -1000 | 1000 | 0  | exchange/dem and reaction |           |       |           |
|                | EX_unsdigalur(e)  | 4-(4-Deoxy-alpha-D-gluc-4-enuronosyl)-D-galacturonate, Unsaturated digalacturonate exchange | unsdigalur[e] <=>  | 1   |    | -1000 | 1000 | 0  | exchange/dem and reaction |           |       |           |

| SEED Rxn ID    | BIGG Rxn ID | Function                                | Formula                                                     | Rev | GA                                                    | LB    | UB   | CS | Subsystem                      | Reference                                   | Notes                                                                                   | EC Number |
|----------------|-------------|-----------------------------------------|-------------------------------------------------------------|-----|-------------------------------------------------------|-------|------|----|--------------------------------|---------------------------------------------|-----------------------------------------------------------------------------------------|-----------|
| EX_cpd00092(e) | EX_ura(e)   | Uracil exchange                         | ura[e] <=>                                                  | 1   |                                                       | -1000 | 1000 | 0  | exchange/dem and reaction      |                                             |                                                                                         |           |
| EX_cpd00073(e) | EX_urea(e)  | Urea exchange                           | urea[e] <=>                                                 | 1   |                                                       | -1000 | 1000 | 0  | exchange/dem and reaction      |                                             |                                                                                         |           |
| EX_cpd00249(e) | EX_uri(e)   | Uridine exchange                        | uri[e] <=>                                                  | 1   |                                                       | -1000 | 1000 | 0  | exchange/dem and reaction      |                                             |                                                                                         |           |
| EX_cpd00156(e) | EX_val_L(e) | L-Valine exchange                       | val-L[e] <=>                                                | 1   |                                                       | -1000 | 1000 | 0  | exchange/dem and reaction      |                                             |                                                                                         |           |
| EX_cpd00309(e) | EX_xan(e)   | Xanthine exchange                       | xan[e] <=>                                                  | 1   |                                                       | -1000 | 1000 | 0  | exchange/dem and reaction      |                                             |                                                                                         |           |
| EX_cpd00154(e) | EX_xyl_D(e) | D-Xylose exchange                       | xyl-D[e] <=>                                                | 1   |                                                       | -1000 | 1000 | 0  | exchange/dem and reaction      |                                             |                                                                                         |           |
| EX_cpd00034(e) | EX_zn2(e)   | Zinc exchange                           | zn2[e] <=>                                                  | 1   |                                                       | -1000 | 1000 | 0  | exchange/dem and reaction      |                                             |                                                                                         |           |
|                | F1PGT       | fucose-1-phosphate guanylyltransferase  | h[c] + gtp[c] + fuc1p-L[c] <=> ppi[c] + gdpfuc[c]           | 1   | BT_2128                                               | -1000 | 1000 | 4  | Alternate Carbon Metabolism    | PMID:15774760, PMID:19379697                | Bacteroides use host-derived fucose for cell surface decoration.                        | 2.7.7.30  |
| rxn05736       | FACOAL140   | fatty-acid--CoA ligase (tetradecanoate) | coa[c] + atp[c] + ttdca[c] <=> tdcoa[c] + amp[c] + ppi[c]   | 1   | (BT_0684 or BT_1226 or BT_2154 or BT_2782 or BT_3550) | -1000 | 1000 | 3  | Glycerophospholipid Metabolism | PMID: 6102980, PMID: 7440508, PMID: 7204330 | Reaction is irreversible in SEED. This reaction is involved in fatty acid biosynthesis. | 6.2.1.3   |
| rxn00947       | FACOAL160   | fatty-acid--CoA ligase (hexadecanoate)  | coa[c] + atp[c] + hdca[c] <=> pmtcoa[c] + amp[c] + ppi[c]   | 1   | (BT_0684 or BT_1226 or BT_2154 or BT_2782 or BT_3550) | -1000 | 1000 | 3  | Glycerophospholipid Metabolism | PMID: 6102980, PMID: 7440508, PMID: 7204330 | Reaction is irreversible in SEED. This reaction is involved in fatty acid biosynthesis. | 6.2.1.3   |
| rxn09450       | FACOAL161   | fatty-acid--CoA ligase (hexadecenoate)  | coa[c] + atp[c] + hdcea[c] <=> amp[c] + ppi[c] + hdcoa[c]   | 1   | (BT_0684 or BT_1226 or BT_2154 or BT_2782 or BT_3550) | -1000 | 1000 | 3  | Glycerophospholipid Metabolism | PMID: 6102980, PMID: 7440508, PMID: 7204330 | Reaction is irreversible in SEED. This reaction is involved in fatty acid biosynthesis. | 6.2.1.3   |
| rxn09449       | FACOAL180   | fatty-acid--CoA ligase (octadecanoate)  | coa[c] + atp[c] + ocdca[c] <=> stcoa[c] + amp[c] + ppi[c]   | 1   | (BT_0684 or BT_1226 or BT_2154 or BT_2782 or BT_3550) | -1000 | 1000 | 3  | Glycerophospholipid Metabolism | PMID: 6102980, PMID: 7440508, PMID: 7204330 | Reaction is irreversible in SEED. This reaction is involved in fatty acid biosynthesis. | 6.2.1.3   |
| rxn09448       | FACOAL181   | fatty-acid--CoA ligase (octadecenoate)  | coa[c] + atp[c] + ocdcea[c] <=> amp[c] + ppi[c] + odecoa[c] | 1   | (BT_0684 or BT_1226 or BT_2154 or BT_2782 or BT_3550) | -1000 | 1000 | 3  | Glycerophospholipid Metabolism | PMID: 6102980, PMID: 7440508, PMID: 7204330 | Reaction is irreversible in SEED. This reaction is involved in fatty acid biosynthesis. | 6.2.1.3   |

| SEED Rxn ID | BIGG Rxn ID | Function                           | Formula                                                     | Rev | GA                                                    | LB    | UB   | CS | Subsystem                      | Reference                                   | Notes                                                                                                                                                                                                                            | EC Number |
|-------------|-------------|------------------------------------|-------------------------------------------------------------|-----|-------------------------------------------------------|-------|------|----|--------------------------------|---------------------------------------------|----------------------------------------------------------------------------------------------------------------------------------------------------------------------------------------------------------------------------------|-----------|
| rxn05248    | FACOALAI15  | fatty-acid--CoA ligase (ANTEISO15) | coa[c] + atp[c] + fa4[c] <=> aipdcoa[c] + amp[c] + ppi[c]   | 1   | (BT_0684 or BT_1226 or BT_2154 or BT_2782 or BT_3550) | -1000 | 1000 | 3  | Glycerophospholipid Metabolism | PMID: 6102980, PMID: 7440508, PMID: 7204330 | Added manually to BIGG database based on reaction mechanism proposed by Model SEED. This reaction is involved in fatty acid biosynthesis. B. thetaiotaomicron is well known to synthesize iso- and anteiso-branched fatty acids. | 6.2.1.3   |
| rxn05251    | FACOALAI17  | fatty-acid--CoA ligase (ANTEISO17) | coa[c] + atp[c] + fa12[c] <=> aihpdcoa[c] + amp[c] + ppi[c] | 1   | (BT_0684 or BT_1226 or BT_2154 or BT_2782 or BT_3550) | -1000 | 1000 | 3  | Glycerophospholipid Metabolism | PMID: 6102980, PMID: 7440508, PMID: 7204330 | Added manually to BIGG database based on reaction mechanism proposed by Model SEED. This reaction is involved in fatty acid biosynthesis. B. thetaiotaomicron is well known to synthesize iso- and anteiso-branched fatty acids. | 6.2.1.3   |
| rxn05247    | FACOALI14   | fatty-acid--CoA ligase (ISO14)     | coa[c] + atp[c] + fa1[c] <=> itdcoa[c] + amp[c] + ppi[c]    | 1   | (BT_0684 or BT_1226 or BT_2154 or BT_2782 or BT_3550) | -1000 | 1000 | 3  | Glycerophospholipid Metabolism | PMID: 6102980, PMID: 7440508, PMID: 7204330 | Added manually to BIGG database based on reaction mechanism proposed by Model SEED. This reaction is involved in fatty acid biosynthesis. B. thetaiotaomicron is well known to synthesize iso- and anteiso-branched fatty acids. | 6.2.1.3   |

| SEED Rxn ID | BIGG Rxn ID | Function                       | Formula                                                    | Rev | GA                                                    | LB    | UB   | CS | Subsystem                      | Reference                                   | Notes                                                                                                                                                                                                                            | EC Number |
|-------------|-------------|--------------------------------|------------------------------------------------------------|-----|-------------------------------------------------------|-------|------|----|--------------------------------|---------------------------------------------|----------------------------------------------------------------------------------------------------------------------------------------------------------------------------------------------------------------------------------|-----------|
| rxn05249    | FACOALI15   | fatty-acid--CoA ligase (ISO15) | coa[c] + atp[c] + fa3[c] <=> ipdcoa[c] + amp[c] + ppi[c]   | 1   | (BT_0684 or BT_1226 or BT_2154 or BT_2782 or BT_3550) | -1000 | 1000 | 3  | Glycerophospholipid Metabolism | PMID: 6102980, PMID: 7440508, PMID: 7204330 | Added manually to BIGG database based on reaction mechanism proposed by Model SEED. This reaction is involved in fatty acid biosynthesis. B. thetaiotaomicron is well known to synthesize iso- and anteiso-branched fatty acids. | 6.2.1.3   |
| rxn05250    | FACOALI16   | fatty-acid--CoA ligase (ISO16) | coa[c] + atp[c] + fa6[c] <=> ihdcoa[c] + amp[c] + ppi[c]   | 1   | (BT_0684 or BT_1226 or BT_2154 or BT_2782 or BT_3550) | -1000 | 1000 | 3  | Glycerophospholipid Metabolism | PMID: 6102980, PMID: 7440508, PMID: 7204330 | Added manually to BIGG database based on reaction mechanism proposed by Model SEED. This reaction is involved in fatty acid biosynthesis. B. thetaiotaomicron is well known to synthesize iso- and anteiso-branched fatty acids. | 6.2.1.3   |
| rxn05252    | FACOALI17   | fatty-acid--CoA ligase (ISO17) | coa[c] + atp[c] + fa11[c] <=> ihpdcoa[c] + amp[c] + ppi[c] | 1   | (BT_0684 or BT_1226 or BT_2154 or BT_2782 or BT_3550) | -1000 | 1000 | 3  | Glycerophospholipid Metabolism | PMID: 6102980, PMID: 7440508, PMID: 7204330 | Added manually to BIGG database based on reaction mechanism proposed by Model SEED. This reaction is involved in fatty acid biosynthesis. B. thetaiotaomicron is well known to synthesize iso- and anteiso-branched fatty acids. | 6.2.1.3   |
| rxn00786    | FBA         | fructose-bisphosphate aldolase | fdp[c] <=> dhap[c] + g3p[c]                                | 1   | (BT_1106 or BT_1659 or BT_1691)                       | -1000 | 1000 | 4  | Glycolysis/Gluconeogenesis     | PMID:73363, PMID:148460                     | Demonstrated by enzyme assay in B. thetaiotaomicron/ close relative B. fragilis.                                                                                                                                                 | 4.1.2.13  |

| SEED Rxn ID | BIGG Rxn ID | Function                                                                     | Formula                                            | Rev | GA                                    | LB    | UB   | CS | Subsystem                         | Reference                  | Notes                                                                                                | EC Number |
|-------------|-------------|------------------------------------------------------------------------------|----------------------------------------------------|-----|---------------------------------------|-------|------|----|-----------------------------------|----------------------------|------------------------------------------------------------------------------------------------------|-----------|
| rxn01870    | FBA2        | D-Fructose 1-phosphate<br>D-glyceraldehyde-3-phosphate-lyase                 | f1p[c] <=><br>glyald[c] +<br>dhap[c]               | 1   | (BT_1106 or<br>BT_1659 or<br>BT_1691) | -1000 | 1000 | 2  | Alternate<br>Carbon<br>Metabolism | PMID:73363,<br>PMID:148460 | This reaction was<br>included by Model<br>SEED, but may not<br>take place. in B.<br>thetaitaomicron. | 4.1.2.13  |
| rxn01334    | FBA3        | Sedoheptulose 1,7-<br>biphosphate D-<br>glyceraldehyde-3-<br>phosphate-lyase | s17bp[c] <=><br>dhap[c] + e4p[c]                   | 1   | (BT_1106 or<br>BT_1659 or<br>BT_1691) | -1000 | 1000 | 4  | Pentose<br>Phosphate<br>Pathway   | PMID:73363,<br>PMID:148460 |                                                                                                      | 4.1.2.13  |
| rxn00549    | FBP         | fructose-bisphosphatase                                                      | h2o[c] + fdp[c]<br>=> pi[c] + f6p[c]               | 0   | BT_1228                               | 0     | 1000 | 2  | Glycolysis/Glu<br>coneogenesis    |                            |                                                                                                      | 3.1.3.11  |
| rxn02319    | FCI         | L-fucose isomerase                                                           | fuc-L[c] <=><br>fcl-L[c]                           | 1   | BT_1273                               | -1000 | 1000 | 4  | Alternate<br>Carbon<br>Metabolism | PMID:10449780              | The L-fucose<br>utilization operon<br>was characterized<br>experimentally.                           | 5.3.1.25  |
|             | FCLK        | L-fuculokinase                                                               | atp[c] + fcl-L[c]<br>=> h[c] + adp[c]<br>+ fc1p[c] | 0   | BT_1275                               | 0     | 1000 | 4  | Alternate<br>Carbon<br>Metabolism | PMID:10449780              | The L-fucose<br>utilization operon<br>was characterized<br>experimentally.                           | 2.7.1.51  |
| rxn01620    | FCLPA       | L-fuculose 1-phosphate<br>aldolase                                           | fc1p[c] <=><br>dhap[c] + lald-<br>L[c]             | 1   | BT_1274                               | -1000 | 1000 | 4  | Alternate<br>Carbon<br>Metabolism | PMID:10449780              | The L-fucose<br>utilization operon<br>was characterized<br>experimentally.                           | 4.1.2.17  |

| SEED Rxn ID | BIGG Rxn ID | Function                           | Formula                                                                                                                                                                 | Rev | GA                                                          | LB    | UB   | CS | Subsystem                | Reference                                 | Notes                                                                                                                                                                                                                                                                                                                                                                                                                                                                                                                                                                                                                                                                                                                                | EC Number |
|-------------|-------------|------------------------------------|-------------------------------------------------------------------------------------------------------------------------------------------------------------------------|-----|-------------------------------------------------------------|-------|------|----|--------------------------|-------------------------------------------|--------------------------------------------------------------------------------------------------------------------------------------------------------------------------------------------------------------------------------------------------------------------------------------------------------------------------------------------------------------------------------------------------------------------------------------------------------------------------------------------------------------------------------------------------------------------------------------------------------------------------------------------------------------------------------------------------------------------------------------|-----------|
|             | FDNADOX     | ferredoxin:NAD+ oxidoreductase     | $\text{nad}[\text{c}] + \text{fdxrd}[\text{c}] \rightleftharpoons \text{h}[\text{c}] + \text{nadh}[\text{c}] + \text{fdxox}[\text{c}]$                                  | 1   |                                                             | -1000 | 1000 | 2  | Unassigned               | PMID:760499, PMID:12740060, PMID:20444704 | <p>In the gut, this reaction allows primary fermenters, such as B. thetaiotaomicron, to regenerate NAD+. Also involves a ferredoxin-dependent hydrogenase (HYD4). The pathway only takes place if the end product hydrogen is removed from the environment because the equilibrium of the reaction favors the formation of NADH. B. thetaiotaomicron generates hydrogen as one of its fermentation end products; accumulation of hydrogen inhibits reoxidation of NADH. It is therefore assumed that it regenerates NAD+ via this pathway, which leads to increased hydrogen partial pressure. Removal of hydrogen allows B. thetaiotaomicron to regenerate NAD+. No gene is known, reaction was added during manual gapfilling.</p> | 1.18.1.3  |
| rxn05555    | FE2abc      | iron (II) transport via ABC system | $\text{h2o}[\text{c}] + \text{atp}[\text{c}] + \text{fe2}[\text{e}] \Rightarrow \text{h}[\text{c}] + \text{pi}[\text{c}] + \text{adp}[\text{c}] + \text{fe2}[\text{c}]$ | 0   | (BT_1592 or (BT_2098 and BT_2099) or (BT_1950 and BT_1952)) | 0     | 1000 | 4  | Transport, Extracellular | BT requires Fe2: PMID:4472783             | Putative annotation (NCBI)                                                                                                                                                                                                                                                                                                                                                                                                                                                                                                                                                                                                                                                                                                           |           |

| SEED Rxn ID | BIGG Rxn ID | Function                                            | Formula                                                                                                                                                                                                                   | Rev | GA                                               | LB    | UB   | CS | Subsystem                                  | Reference                  | Notes                                                                                                                         | EC Number |
|-------------|-------------|-----------------------------------------------------|---------------------------------------------------------------------------------------------------------------------------------------------------------------------------------------------------------------------------|-----|--------------------------------------------------|-------|------|----|--------------------------------------------|----------------------------|-------------------------------------------------------------------------------------------------------------------------------|-----------|
| rxn05189    | FE3abc      | iron (III) transport via ABC system                 | $\text{h2o}[\text{c}] + \text{atp}[\text{c}] + \text{fe3}[\text{e}] \Rightarrow \text{h}[\text{c}] + \text{pi}[\text{c}] + \text{adp}[\text{c}] + \text{fe3}[\text{c}]$                                                   | 0   | ((BT_2098 and BT_2099) or (BT_1950 and BT_1952)) | 0     | 1000 | 2  | Transport, Extracellular                   |                            | Added by Model SEED during auto-completion step in pipeline. Gene annotation was added from NCBI Gene during manual curation. |           |
| rxn05195    | FE3DCITabc  | iron transport from ferric-dicitrate via ABC system | $\text{h2o}[\text{c}] + \text{atp}[\text{c}] + \text{fe3dcit}[\text{e}] \Rightarrow \text{h}[\text{c}] + \text{pi}[\text{c}] + \text{adp}[\text{c}] + 2 \text{cit}[\text{c}] + \text{fe3}[\text{c}]$                      | 0   | BT_1951                                          | 0     | 1000 | 2  | Transport, Extracellular                   |                            | Added based on BIGG database                                                                                                  |           |
| rxn05557    | FEDCabc     | iron (III) dicitrate transport via ABC system       | $\text{h2o}[\text{c}] + \text{atp}[\text{c}] + 2 \text{cit}[\text{e}] + \text{fe3}[\text{e}] \Rightarrow \text{h}[\text{c}] + \text{pi}[\text{c}] + \text{adp}[\text{c}] + 2 \text{cit}[\text{c}] + \text{fe3}[\text{c}]$ | 0   | BT_1951                                          | 0     | 1000 | 2  | Transport, Extracellular                   |                            |                                                                                                                               |           |
| rxn00056    | FERO        | ferroxidase                                         | $4 \text{h}[\text{c}] + \text{o2}[\text{c}] + 4 \text{fe2}[\text{c}] \Rightarrow 2 \text{h2o}[\text{c}] + 4 \text{fe3}[\text{c}]$                                                                                         | 0   | BT_4715                                          | 0     | 1000 | 2  | Porphyrin and Chlorophyll Metabolism       |                            |                                                                                                                               | 1.16.3.1  |
|             | FK          | Fucokinase                                          | $\text{atp}[\text{c}] + \text{fuc-L}[\text{c}] \Rightarrow \text{h}[\text{c}] + \text{adp}[\text{c}] + \text{fuc1p-L}[\text{c}]$                                                                                          | 0   | BT_2128                                          | 0     | 1000 | 4  | Alternate Carbon Metabolism                | PMID:15774760              | The pathway was demonstrated experimentally in Bacteroides fragilis.                                                          | 2.7.1.52  |
| rxn00122    | FMNAT       | FMN adenylyltransferase                             | $\text{h}[\text{c}] + \text{atp}[\text{c}] + \text{fmn}[\text{c}] \Rightarrow \text{ppi}[\text{c}] + \text{fad}[\text{c}]$                                                                                                | 0   | BT_2543                                          | 0     | 1000 | 2  | Cofactor and Prosthetic Group Biosynthesis |                            |                                                                                                                               | 2.7.7.2   |
| rxn02201    | FOLD3       | dihydropteroate synthase                            | $4 \text{abz}[\text{c}] + 2 \text{ahhmd}[\text{c}] \Rightarrow \text{ppi}[\text{c}] + \text{dhpt}[\text{c}]$                                                                                                              | 0   | BT_3646                                          | 0     | 1000 | 2  | Folate Metabolism                          |                            |                                                                                                                               | 2.5.1.15  |
|             | FOLR        | tetrahydrofolate NADP oxidoreductase                | $2 \text{nadp}[\text{c}] + \text{thf}[\text{c}] \Leftrightarrow \text{h}[\text{c}] + 2 \text{nadph}[\text{c}] + \text{fol}[\text{c}]$                                                                                     | 1   | (BT_0106 or BT_2048)                             | -1000 | 1000 | 2  | Folate Metabolism                          | PMID:4853401, PMID:9167138 | Added to allow folate biosynthesis. B. thetaiotaomicron does not require folate in medium.                                    | 1.5.1.3   |

| SEED Rxn ID | BIGG Rxn ID | Function                                                   | Formula                                                                                                                                                                        | Rev | GA                    | LB    | UB   | CS | Subsystem                                  | Reference                    | Notes                                                                                                                                                                                                              | EC Number |
|-------------|-------------|------------------------------------------------------------|--------------------------------------------------------------------------------------------------------------------------------------------------------------------------------|-----|-----------------------|-------|------|----|--------------------------------------------|------------------------------|--------------------------------------------------------------------------------------------------------------------------------------------------------------------------------------------------------------------|-----------|
| rxn05255    | FOLt        | FOLt                                                       | $\begin{matrix} \text{h[e]} + \text{fol[e]} <=> \\ \text{h[c]} + \text{fol[c]} \end{matrix}$                                                                                   | 1   |                       | -1000 | 1000 | 2  | Transport, Extracellular                   | PMID:9167138                 | It is well established that the gut microbiota produces folic acid. Colonic absorption of bacterial folate seems to be significant. It is assumed that B. thetaiotaomicron is one of the sources of folate supply. |           |
|             | FOMETR      | aminomethyltransferase                                     | $\begin{matrix} \text{h[c]} + 5\text{fthf[c]} \\ <=> \text{h2o[c]} + \\ \text{methf[c]} \end{matrix}$                                                                          | 1   | BT_4584               | -1000 | 1000 | 2  | Cofactor and Prosthetic Group Biosynthesis |                              | One of several reactions catalyzed by aminomethyltransferase (EC 2.1.2.10). Added based on KEGG Pathway.                                                                                                           | 2.1.2.10  |
|             | FORt        | formate transport via diffusion                            | $\text{for[c]} <=> \text{for[e]}$                                                                                                                                              | 1   |                       | 0     | 1000 | 2  | Transport, Extracellular                   | PMID:9178362                 | B. thetaiotaomicron produces formate under certain circumstances.                                                                                                                                                  |           |
| rxn00689    | FPGS_tm     | TetrahydrofolateL-glutamate gamma-ligase (ADP-forming)     | $\begin{matrix} \text{glu-L[c]} + \text{atp[c]} \\ + \text{thf[c]} => \text{h[c]} \\ + \text{pi[c]} + \text{adp[c]} \\ + \text{thfglu[c]} \end{matrix}$                        | 0   | BT_1335               | 0     | 1000 | 2  | Folate Metabolism                          |                              |                                                                                                                                                                                                                    | 6.3.2.17  |
| rxn01210    | FPGS7       | 10-Formyltetrahydrofolate L-glutamate ligase (ADP-forming) | $\begin{matrix} 4 \text{ glu-L[c]} + 4 \\ \text{atp[c]} + 10\text{fthf[c]} \\ => 4 \text{ h[c]} + 4 \\ \text{pi[c]} + 4 \text{ adp[c]} + \\ 10\text{fthf5glu[c]} \end{matrix}$ | 0   | BT_1335               | 0     | 1000 | 2  | Folate Metabolism                          |                              |                                                                                                                                                                                                                    | 6.3.2.17  |
|             | FRD10       | fumarate reductase                                         | $\begin{matrix} \text{fum[c]} + \\ \text{mql10[c]} => \\ \text{succ[c]} + \\ \text{mqn10[c]} \end{matrix}$                                                                     | 0   | (BT_3054 and BT_3055) | 0     | 1000 | 4  | TCA Cycle                                  | PMID:12777495, PMID:11260473 | Bacteroides have both succinate dehydrogenase and fumarate reductase activity. Fumarate reductase is a key enzyme in central metabolism. AH                                                                        |           |

| SEED Rxn ID | BIGG Rxn ID | Function           | Formula                                    | Rev | GA                    | LB | UB   | CS | Subsystem | Reference                    | Notes                                                                                                                                                                                                                         | EC Number |
|-------------|-------------|--------------------|--------------------------------------------|-----|-----------------------|----|------|----|-----------|------------------------------|-------------------------------------------------------------------------------------------------------------------------------------------------------------------------------------------------------------------------------|-----------|
|             | FRD11       | fumarate reductase | fum[c] + mql11[c] => succ[c] + mqn11[c]    | 0   | (BT_3054 and BT_3055) | 0  | 1000 | 4  | TCA Cycle | PMID:12777495, PMID:11260473 | Bacteroides have both succinate dehydrogenase and fumarate reductase activity. Fumarate reductase is a key enzyme in central metabolism. AH                                                                                   |           |
| rxn08527    | FRD2        | fumarate reductase | fum[c] + mql8[c] => succ[c] + mqn8[c]      | 0   | (BT_3054 and BT_3055) | 0  | 1000 | 4  | TCA Cycle | PMID:12777495, PMID:11260473 | Bacteroides have both succinate dehydrogenase and fumarate reductase activity. Fumarate reductase is a key enzyme in central metabolism. AH                                                                                   | 1.3.99.1  |
| rxn08528    | FRD3        | fumarate reductase | fum[c] + 2dmmql8[c] => 2dmmq8[c] + succ[c] | 0   | (BT_3054 and BT_3055) | 0  | 1000 | 3  | TCA Cycle | PMID:12777495, PMID:11260473 | Bacteroides have both succinate dehydrogenase and fumarate reductase activity. Fumarate reductase is a key enzyme in central metabolism. It is not known if B. thetaiotaomicron uses demethylmenaquinone or only menaquinone. | 1.3.99.1  |
|             | FRD8        | fumarate reductase | fum[c] + mql7[c] => succ[c] + mqn7[c]      | 0   | (BT_3054 and BT_3055) | 0  | 1000 | 4  | TCA Cycle | PMID:12777495, PMID:11260473 | Bacteroides have both succinate dehydrogenase and fumarate reductase activity. Fumarate reductase is a key enzyme in central metabolism. AH                                                                                   |           |
|             | FRD9        | fumarate reductase | fum[c] + mql9[c] => succ[c] + mqn9[c]      | 0   | (BT_3054 and BT_3055) | 0  | 1000 | 4  | TCA Cycle | PMID:12777495, PMID:11260473 | Bacteroides have both succinate dehydrogenase and fumarate reductase activity. Fumarate reductase is a key enzyme in central metabolism. AH                                                                                   |           |

| SEED Rxn ID | BIGG Rxn ID | Function                                                | Formula                                                 | Rev | GA                              | LB    | UB   | CS | Subsystem                                  | Reference                     | Notes                                                                       | EC Number |
|-------------|-------------|---------------------------------------------------------|---------------------------------------------------------|-----|---------------------------------|-------|------|----|--------------------------------------------|-------------------------------|-----------------------------------------------------------------------------|-----------|
| rxn01486    | FRTT        | trans,trans-Farnesyl-diphosphateisopentenyl-diphosphate | ipdp[c] + frdp[c] => ppi[c] + ggdp[c]                   | 0   | (BT_3261 or BT_2058)            | 0     | 1000 | 2  | Cofactor and Prosthetic Group Biosynthesis |                               |                                                                             | 2.5.1.29  |
|             | FRUASE3     | Intracellular endofructanase                            | h2o[c] + levanb[c] => 2 fru[c]                          | 0   | BT_1765                         | 0     | 1000 | 4  | Plant Polysaccharide Degradation           | PMID:20603004                 | Intracellular fructanase acitivity was demonstrated in B. thetaiotaomicron. | 3.2.1.65  |
|             | FRUt2r      | D-fructose transport in via proton symport reversible   | h[e] + fru[e] <=> h[c] + fru[c]                         | 1   | BT_1758                         | -1000 | 1000 | 4  | Transport, Extracellular                   | PMID: 20603004                | B. thetaiotaomicron grows on D-fructose.                                    |           |
| rxn01654    | FTCD_r      | Formiminotetrahydrofolate cyclodeaminase (EC 4.3.1.4)   | 2 h[c] + 5forthf[c] <=> nh4[c] + methf[c]               | 1   | BT_2691                         | -1000 | 1000 | 2  | Folate Metabolism                          |                               |                                                                             | 4.3.1.4   |
| rxn01653    | FTHFCL      | 5-formethyltetrahydrofolate cyclo-ligase                | atp[c] + 5fthf[c] => pi[c] + adp[c] + methf[c]          | 0   | BT_4258                         | 0     | 1000 | 2  | Folate Metabolism                          |                               | Putative annotation (NCBI)                                                  | 6.3.3.2   |
| rxn00691    | FTHFD       | formyltetrahydrofolate deformylase                      | h2o[c] + 10fthf[c] => h[c] + thf[c] + for[c]            | 0   | BT_1381                         | 0     | 1000 | 2  | Folate Metabolism                          |                               |                                                                             | 3.5.1.10  |
| rxn00690    | FTHFLi      | formate-tetrahydrofolate ligase                         | atp[c] + thf[c] + for[c] => pi[c] + adp[c] + 10fthf[c]  | 0   | BT_0737                         | 0     | 1000 | 2  | Folate Metabolism                          |                               |                                                                             | 6.3.4.3   |
|             | FUCASEe     | alpha-fucosidase, extracellular                         | h2o[e] + s2l2fn2m2masn[e] => fuc-L[e] + s2l2n2m2masn[e] | 0   | (BT_1842 or BT_2970 or BT_3665) | 0     | 1000 | 4  | N-Glycan Degradation                       | PMID:15774760, PMID:19379697' | Bacteroides use host-derived fucose for cell surface decoration.            | 3.2.1.51  |

| SEED Rxn ID | BIGG Rxn ID           | Function                                                                                                                                                                | Formula                                                                                                                                                                                                                                            | Rev | GA                                                                                                                                                                                                                                                                                                                                                                                                                          | LB    | UB   | CS | Subsystem                   | Reference                         | Notes                                                                                                                                                                                                                                                                                                                                                                                                                  | EC Number |
|-------------|-----------------------|-------------------------------------------------------------------------------------------------------------------------------------------------------------------------|----------------------------------------------------------------------------------------------------------------------------------------------------------------------------------------------------------------------------------------------------|-----|-----------------------------------------------------------------------------------------------------------------------------------------------------------------------------------------------------------------------------------------------------------------------------------------------------------------------------------------------------------------------------------------------------------------------------|-------|------|----|-----------------------------|-----------------------------------|------------------------------------------------------------------------------------------------------------------------------------------------------------------------------------------------------------------------------------------------------------------------------------------------------------------------------------------------------------------------------------------------------------------------|-----------|
|             | FUCNEULACNH<br>X_DEGe | monofucosyl-<br>monosialyl-lacto-N-<br>hexaose degradation by<br>alpha-fucosidase,<br>sialidase, N-<br>acetylglutaminidase and<br>beta-galactosidase<br>(extracellular) | $8 \text{ h}_2\text{o}[\text{e}] + 2 \text{ fucneulacnhx}[\text{e}] \Rightarrow 2 \text{ fuc-L}[\text{e}] + 2 \text{ acgam}[\text{e}] + 2 \text{ acnam}[\text{e}] + 2 \text{ gal}[\text{e}] + \text{lacnnttr}[\text{e}] + \text{lacntr}[\text{e}]$ | 0   | ((BT_1625 or BT_4136) and (BT_0455 or BT_2194 or BT_2892) and (BT_1626 or BT_0461) and (BT_1627 or BT_1632 or BT_4132 or BT_0459 or BT_0460 or BT_1038 or BT_1044 or BT_1048 or BT_1051 or BT_4295 or BT_2825) and ((BT_1630 and BT_1631) or (BT_4134 and BT_4135) or (BT_1039 and BT_1040) or (BT_1042 and BT_1043) or (BT_1046 and BT_1047) or (BT_4297 and BT_4298) or (BT_2818 and BT_2819) or (BT_2820 and BT_2821)))) | 0     | 1000 | 3  | HMO<br>Degradation          | PMID: 22036470,<br>PMID: 20679197 | B. thetaiotaomicron grows on human milk oligosaccharides (HMOs); numerous glycosidase hydrolases are upregulated during growth on HMOs. Lacto-N-tetraose and Lacto-N-neotetraose are poorly metabolized and accumulate if BT is grown on HMOs. Putative reaction. Structure based on PMID: 20679197. Involves beta-galactosidase, alpha-fucosidase, sialidase, N-acetylglucosaminidase, susC, susD (binding proteins). |           |
|             | FUCt                  | L-fucose transport via<br>proton symport                                                                                                                                | $\text{fuc-L}[\text{e}] + \text{h}[\text{e}] \Leftrightarrow \text{h}[\text{c}] + \text{fuc-L}[\text{c}]$                                                                                                                                          | 1   | (BT_1277 or BT_3616)                                                                                                                                                                                                                                                                                                                                                                                                        | -1000 | 1000 | 4  | Transport,<br>Extracellular | PMID:10449780                     | B. thetaiotaomicron can use L-fucose as carbon source.                                                                                                                                                                                                                                                                                                                                                                 |           |
| rxn00799    | FUM                   | fumarase                                                                                                                                                                | $\text{h}_2\text{o}[\text{c}] + \text{fum}[\text{c}] \Leftrightarrow \text{mal-L}[\text{c}]$                                                                                                                                                       | 1   | BT_2256                                                                                                                                                                                                                                                                                                                                                                                                                     | -1000 | 1000 | 4  | TCA Cycle                   | PMID: 12777495                    | Role of enzyme was characterized experimentally in Bacteroides fragilis.                                                                                                                                                                                                                                                                                                                                               | 4.2.1.2   |
| rxn05561    | FUMt2r                | fumarate reversible<br>transport via symport                                                                                                                            | $\text{h}[\text{e}] + \text{fum}[\text{e}] \Leftrightarrow \text{h}[\text{c}] + \text{fum}[\text{c}]$                                                                                                                                              | 1   | BT_2756                                                                                                                                                                                                                                                                                                                                                                                                                     | -1000 | 1000 | 2  | Transport,<br>Extracellular |                                   | Annotation from NCBI Gene.                                                                                                                                                                                                                                                                                                                                                                                             |           |

| SEED Rxn ID | BIGG Rxn ID | Function                                             | Formula                                           | Rev | GA                   | LB    | UB   | CS | Subsystem                            | Reference                                   | Notes                                                                                                                                                                                                                                   | EC Number |
|-------------|-------------|------------------------------------------------------|---------------------------------------------------|-----|----------------------|-------|------|----|--------------------------------------|---------------------------------------------|-----------------------------------------------------------------------------------------------------------------------------------------------------------------------------------------------------------------------------------------|-----------|
| rxn03638    | G1PACT      | glucosamine-1-phosphate N-acetyltransferase          | accoa[c] + gam1p[c] => h[c] + coa[c] + acgam1p[c] | 0   |                      | 0     | 1000 | 1  | Cell Envelope Biosynthesis           |                                             | This enzyme was added to allow synthesis of N-acetylglucosamine from glucose . This role might also be fulfilled by glucosamine-6-phosphate-acetyltransferase (EC 2.3.1.4), it is unclear which pathway is used by B. thetaiotaomicron. | 2.3.1.157 |
| rxn00702    | G1PCT       | Glucose-1-phosphate cytidyltransferase (EC 2.7.7.33) | h[c] + ctp[c] + g1p[c] <=> ppi[c] + cdpglc[c]     | 1   | BT_1351              | -1000 | 1000 | 2  | Alternate Carbon Metabolism          |                                             |                                                                                                                                                                                                                                         | 2.7.7.33  |
| rxn01675    | G1PTT       | glucose-1-phosphate thymidyltransferase              | h[c] + dttp[c] + g1p[c] => ppi[c] + dtdpglu[c]    | 0   | (BT_0463 or BT_2017) | 0     | 1000 | 2  | Capsular Polysaccharide Biosynthesis |                                             | Reversible in SEED                                                                                                                                                                                                                      | 2.7.7.24  |
| rxn08546    | G3PAT120    | glycerol-3-phosphate acyltransferase (C12:0)         | ddcaACP[c] + glyc3p[c] => ACP[c] + 1ddecg3p[c]    | 0   |                      | 0     | 1000 | 2  | Glycerophospholipid Metabolism       | PMID: 6102980, PMID: 7440508, PMID: 7204330 | Added during manual gapfilling to allow lipid biosynthesis to take place. GPR is unknown.                                                                                                                                               | 2.3.1.15  |
| rxn08547    | G3PAT140    | glycerol-3-phosphate acyltransferase (C14:0)         | myrsACP[c] + glyc3p[c] => ACP[c] + 1tdecg3p[c]    | 0   |                      | 0     | 1000 | 2  | Glycerophospholipid Metabolism       | PMID: 6102980, PMID: 7440508, PMID: 7204330 | Added during manual gapfilling to allow lipid biosynthesis to take place. GPR is unknown.                                                                                                                                               | 2.3.1.15  |
| rxn08549    | G3PAT160    | glycerol-3-phosphate acyltransferase (C16:0)         | palmACP[c] + glyc3p[c] => ACP[c] + 1hdecg3p[c]    | 0   |                      | 0     | 1000 | 2  | Glycerophospholipid Metabolism       | PMID: 6102980, PMID: 7440508, PMID: 7204330 | Added during manual gapfilling to allow lipid biosynthesis to take place. GPR is unknown.                                                                                                                                               | 2.3.1.15  |
| rxn08551    | G3PAT180    | glycerol-3-phosphate acyltransferase (C18:0)         | ocdcaACP[c] + glyc3p[c] => ACP[c] + 1odecg3p[c]   | 0   |                      | 0     | 1000 | 2  | Glycerophospholipid Metabolism       | PMID: 6102980, PMID: 7440508, PMID: 7204330 | Added during autocompletion step by Model SEED to allow lipid biosynthesis to take place. GPR is unknown.                                                                                                                               | 2.3.1.15  |

| SEED Rxn ID | BIGG Rxn ID | Function                                                    | Formula                                                 | Rev | GA      | LB    | UB   | CS | Subsystem                      | Reference                                   | Notes                                                                                                     | EC Number |
|-------------|-------------|-------------------------------------------------------------|---------------------------------------------------------|-----|---------|-------|------|----|--------------------------------|---------------------------------------------|-----------------------------------------------------------------------------------------------------------|-----------|
| rxn08552    | G3PAT181    | glycerol-3-phosphate acyltransferase (C18:1)                | octeACP[c] + glyc3p[c] => ACP[c] + lodec1leg3p[c]       | 0   |         | 0     | 1000 | 2  | Glycerophospholipid Metabolism | PMID: 6102980, PMID: 7440508, PMID: 7204330 | Added during manual gapfilling to allow lipid biosynthesis to take place. GPR is unknown.                 | 2.3.1.15  |
| rxn10209    | G3PAT115    | anteisopentadecanoyl-glycerol-3-phosphate O-acyltransferase | h[c] + aipdcoa[c] + glyc3p[c] => coa[c] + laipdecg3p[c] | 0   |         | 0     | 1000 | 2  | Glycerophospholipid Metabolism | PMID: 6102980, PMID: 7440508, PMID: 7204330 | Added during manual gapfilling to allow lipid biosynthesis to take place. GPR is unknown.                 | 2.3.1.15  |
| rxn10206    | G3PAT117    | anteisoheptadecanoyl-glycerol-3-phosphate O-acyltransferase | aihpdcoa[c] + glyc3p[c] => coa[c] + laihpdecg3p[c]      | 0   |         | 0     | 1000 | 2  | Glycerophospholipid Metabolism | PMID: 6102980, PMID: 7440508, PMID: 7204330 | Added during autocompletion step by Model SEED to allow lipid biosynthesis to take place. GPR is unknown. | 2.3.1.15  |
| rxn10207    | G3PAT114    | isotetradecanoyl-glycerol-3-phosphate O-acyltransferase     | h[c] + itdcoa[c] + glyc3p[c] => coa[c] + litdecg3p[c]   | 0   |         | 0     | 1000 | 2  | Glycerophospholipid Metabolism | PMID: 6102980, PMID: 7440508, PMID: 7204330 | Added during manual gapfilling to allow lipid biosynthesis to take place. GPR is unknown.                 | 2.3.1.15  |
| rxn10208    | G3PAT115    | isopentadecanoyl-glycerol-3-phosphate O-acyltransferase     | h[c] + ipdcoa[c] + glyc3p[c] => coa[c] + lipdecg3p[c]   | 0   |         | 0     | 1000 | 2  | Glycerophospholipid Metabolism | PMID: 6102980, PMID: 7440508, PMID: 7204330 | Added during manual gapfilling to allow lipid biosynthesis to take place. GPR is unknown.                 | 2.3.1.15  |
| rxn10210    | G3PAT116    | isohexadecanoyl-glycerol-3-phosphate O-acyltransferase      | h[c] + ihdcoa[c] + glyc3p[c] => coa[c] + lihdecg3p[c]   | 0   |         | 0     | 1000 | 2  | Glycerophospholipid Metabolism | PMID: 6102980, PMID: 7440508, PMID: 7204330 | Added during manual gapfilling to allow lipid biosynthesis to take place. GPR is unknown.                 | 2.3.1.15  |
| rxn10205    | G3PAT117    | isoheptadecanoyl-glycerol-3-phosphate O-acyltransferase     | ihpdcoa[c] + glyc3p[c] => coa[c] + lihpdecg3p[c]        | 0   |         | 0     | 1000 | 2  | Glycerophospholipid Metabolism | PMID: 6102980, PMID: 7440508, PMID: 7204330 | Added during autocompletion step by Model SEED to allow lipid biosynthesis to take place. GPR is unknown. | 2.3.1.15  |
| rxn00611    | G3PD1       | glycerol-3-phosphate dehydrogenase (NAD)                    | nad[c] + glyc3p[c] <=> h[c] + nadh[c] + dhap[c]         | 1   | BT_2123 | -1000 | 1000 | 2  | Glycerophospholipid Metabolism |                                             |                                                                                                           | 1.1.1.94  |

| SEED Rxn ID | BIGG Rxn ID | Function                                             | Formula                                                     | Rev | GA                                         | LB    | UB   | CS | Subsystem                       | Reference     | Notes                                                                                                                                                                                      | EC Number |
|-------------|-------------|------------------------------------------------------|-------------------------------------------------------------|-----|--------------------------------------------|-------|------|----|---------------------------------|---------------|--------------------------------------------------------------------------------------------------------------------------------------------------------------------------------------------|-----------|
| rxn02374    | G5SADs      | L-glutamate 5-semialdehyde dehydratase (spontaneous) | glu5sa[c] <=> h2o[c] + h[c] + 1pyr5c[c]                     | 1   |                                            | -1000 | 1000 | 1  | Arginine and Proline Metabolism |               |                                                                                                                                                                                            |           |
| rxn02373    | G5SD        | glutamate-5-semialdehyde dehydrogenase               | h[c] + nadph[c] + glu5p[c] => nadp[c] + pi[c] + glu5sa[c]   | 0   | BT_3718                                    | 0     | 1000 | 2  | Arginine and Proline Metabolism |               |                                                                                                                                                                                            | 1.2.1.41  |
| rxn01975    | G6PBDH      | beta-D-Glucose-6-phosphateNADP+ 1-oxoreductase       | nadp[c] + g6p-B[c] <=> h[c] + nadph[c] + 6pgl[c]            | 1   | BT_1221                                    | -1000 | 1000 | 4  | Pentose Phosphate Pathway       | PMID: 7183748 | Demonstrated biochemically.                                                                                                                                                                | 1.1.1.49  |
| rxn00552    | G6PDA       | glucosamine-6-phosphate deaminase                    | h2o[c] + gam6p[c] => nh4[c] + f6p[c]                        | 0   | (BT_0258 or BT_3587 or BT_3601 or BT_4127) | 0     | 1000 | 4  | Aminosugar Metabolism           | PMID: 7240086 | B. thetaiotaomicron metabolizes glucosamine.                                                                                                                                               | 3.5.99.6  |
| rxn00604    | G6PDH2r     | glucose 6-phosphate dehydrogenase                    | nadp[c] + g6p[c] <=> h[c] + nadph[c] + 6pgl[c]              | 1   | BT_1221                                    | -1000 | 1000 | 4  | Pentose Phosphate Pathway       | PMID: 7183748 | Demonstrated biochemically.                                                                                                                                                                | 1.1.1.49  |
| rxn01977    | G6PI        | alpha-D-Glucose 6-phosphate ketol-isomerase          | g6p[c] <=> g6p-B[c]                                         | 1   | BT_2124                                    | -1000 | 1000 | 4  | Glycolysis/Gluconeogenesis      | PMID: 6804433 | Measured by enzyme assay for B. thetaiotaomicron.                                                                                                                                          | 5.3.1.9   |
| rxn02380    | G6PI3       | beta-D-Glucose 6-phosphate ketol-isomerase           | g6p-B[c] <=> f6p[c]                                         | 1   | BT_2124                                    | -1000 | 1000 | 4  | Glycolysis/Gluconeogenesis      | PMID: 6804433 | Measured by enzyme assay for B. thetaiotaomicron.                                                                                                                                          | 5.3.1.9   |
|             | GACPCD      | Glutaryl-ACP condensation catalyzed by FabB or FabF  | h[c] + malACP[c] + gACPM[c] => ACP[c] + 3opACPM[c] + co2[c] | 0   | BT_3358                                    | 0     | 1000 | 3  | Biotin Metabolism               | PMID:20693992 | Based on biotin synthesis described in PMID:20693992 for E. coli. The authors are unsure if this reaction is carried out by FabB or FabF. Here, FabF is assumed to carry out the reaction. |           |
|             | GALAM6PDA   | Galactosamine-6-phosphate deaminase                  | h2o[c] + galam6p[c] => nh4[c] + tag6p-D[c]                  | 0   |                                            | 0     | 1000 | 2  | Aminosugar Metabolism           | PMID:2845859  | B. thetaiotaomicron grows on N-acetylglactosamine: PMID:2845859. However, the utilization pathway is poorly understood.                                                                    |           |

| SEED Rxn ID | BIGG Rxn ID | Function                                              | Formula                                                  | Rev | GA                                                                                                                                                                                                                                                                                                      | LB    | UB   | CS | Subsystem                     | Reference                   | Notes                                                                                                               | EC Number |
|-------------|-------------|-------------------------------------------------------|----------------------------------------------------------|-----|---------------------------------------------------------------------------------------------------------------------------------------------------------------------------------------------------------------------------------------------------------------------------------------------------------|-------|------|----|-------------------------------|-----------------------------|---------------------------------------------------------------------------------------------------------------------|-----------|
|             | GALAMt2r    | galactosamine transport (proton symport)              | h[e] + galam[e]<br><=> h[c] + galam[c]                   | 1   |                                                                                                                                                                                                                                                                                                         | -1000 | 1000 | 2  | Transport, Extracellular      | PMID: 6367911               | B. thetaiotaomicron metabolizes galactosamine to some extent (though the compound does not support growth in vivo). |           |
|             | GALASE_HSe  | Extracellular beta-galactosidase, heparin degradation | 2 h2o[e] + hspg_degr_15[e]<br>=> 2 gal[e] + hspg_rest[e] | 0   | (BT_0290 or BT_0461 or BT_0757 or BT_0983 or BT_0992 or BT_0993 or BT_0996 or BT_1626 or BT_2190 or BT_2680 or BT_2922 or BT_2969 or BT_3092 or BT_3114 or BT_3179 or BT_3293 or BT_3340 or BT_3513 or BT_3654 or BT_4050 or BT_4152 or BT_4156 or BT_4160 or BT_4181 or BT_4241 or BT_4667 or BT_4684) | 0     | 1000 | 4  | Glycosaminoglycan Degradation | PMID:19801541, PMID:7574611 | B. thetaiotaomicron specific putative heparin sulfate degradation pathway.                                          | 3.2.1.23  |

| SEED Rxn ID | BIGG Rxn ID          | Function                                                      | Formula                                                  | Rev | GA                                    | LB | UB   | CS | Subsystem               | Reference                                                | Notes                                                                                                                                                                                                                                                                                                           | EC Number |
|-------------|----------------------|---------------------------------------------------------------|----------------------------------------------------------|-----|---------------------------------------|----|------|----|-------------------------|----------------------------------------------------------|-----------------------------------------------------------------------------------------------------------------------------------------------------------------------------------------------------------------------------------------------------------------------------------------------------------------|-----------|
|             | GALASE_OGLYC<br>AN1e | Beta-galactosidase,<br>mucin-type O-glycans,<br>extracellular | h2o[e] + f1a[e]<br>=> gal[e] +<br>core6[e]               | 0   | BT_4241 and<br>BT_4246 and<br>BT_4247 | 0  | 1000 | 4  | O-Glycan<br>Degradation | PMID:<br>18996345,<br>PMID:<br>10430883,<br>PMID: 848954 | B. thetaiotaomicron is<br>well known to<br>degrade mucin, the<br>genes included in the<br>GPR are upregulated<br>during growth on<br>mucin. The<br>subsystem "O-Glycan<br>Biosynthesis" in<br>Recon1 represents<br>mucin biosynthesis.<br>Involves beta-<br>galactosidase, susC,<br>susD (binding<br>proteins). |           |
|             | GALASE_OGLYC<br>AN2e | Beta-galactosidase,<br>mucin-type O-glycans,<br>extracellular | h2o[e] +<br>T_antigen[e] =><br>gal[e] +<br>Tn_antigen[e] | 0   | BT_4241 and<br>BT_4246 and<br>BT_4247 | 0  | 1000 | 4  | O-Glycan<br>Degradation | PMID:<br>18996345,<br>PMID:<br>10430883,<br>PMID: 848954 | B. thetaiotaomicron is<br>well known to<br>degrade mucin, the<br>genes included in the<br>GPR are upregulated<br>during growth on<br>mucin. The<br>subsystem "O-Glycan<br>Biosynthesis" in<br>Recon1 represents<br>mucin biosynthesis.<br>Involves beta-<br>galactosidase, susC,<br>susD (binding<br>proteins). |           |
|             | GALASE_OGLYC<br>AN3e | Beta-galactosidase,<br>mucin-type O-glycans,<br>extracellular | h2o[e] + core8[e]<br>=> gal[e] +<br>Tn_antigen[e]        | 0   | BT_4241 and<br>BT_4246 and<br>BT_4247 | 0  | 1000 | 4  | O-Glycan<br>Degradation | PMID:<br>18996345,<br>PMID:<br>10430883,<br>PMID: 848954 | B. thetaiotaomicron is<br>well known to<br>degrade mucin, the<br>genes included in the<br>GPR are upregulated<br>during growth on<br>mucin. The<br>subsystem "O-Glycan<br>Biosynthesis" in<br>Recon1 represents<br>mucin biosynthesis.<br>Involves beta-<br>galactosidase, susC,<br>susD (binding<br>proteins). |           |

| SEED Rxn ID | BIGG Rxn ID | Function                                 | Formula                                                                                   | Rev | GA                                                                                                                                                                                                                                                                                                      | LB    | UB   | CS | Subsystem                   | Reference                    | Notes                                                         | EC Number |
|-------------|-------------|------------------------------------------|-------------------------------------------------------------------------------------------|-----|---------------------------------------------------------------------------------------------------------------------------------------------------------------------------------------------------------------------------------------------------------------------------------------------------------|-------|------|----|-----------------------------|------------------------------|---------------------------------------------------------------|-----------|
|             | GALASE1e    | beta-galactosidase, extracellular        | $2 \text{ h2o[e]} + \text{ l2n2m2mn[e]} \Rightarrow \text{ n2m2mn[e]} + 2 \text{ gal[e]}$ | 0   | (BT_0290 or BT_0461 or BT_0757 or BT_0983 or BT_0992 or BT_0993 or BT_0996 or BT_1626 or BT_2190 or BT_2680 or BT_2922 or BT_2969 or BT_3092 or BT_3114 or BT_3179 or BT_3293 or BT_3340 or BT_3513 or BT_3654 or BT_4050 or BT_4152 or BT_4156 or BT_4160 or BT_4181 or BT_4241 or BT_4667 or BT_4684) | 0     | 1000 | 3  | N-Glycan Degradation        | PMID:16968696, PMID:17132046 | B. thetaiotaomicron ferments host-derived N-glycans.          | 3.2.1.23  |
| rxn00808    | GALK        | galactokinase                            | $\text{atp[c]} + \text{gal[c]} \Rightarrow \text{h[c]} + \text{adp[c]} + \text{gal1p[c]}$ | 0   | BT_0370                                                                                                                                                                                                                                                                                                 | 0     | 1000 | 4  | Alternate Carbon Metabolism | PMID:16887504                | B. thetaiotaomicron grows on galactose as sole carbon source. | 2.7.1.6   |
| rxn01171    | GALM1r      | aldose 1-epimerase (glucose), reversible | $\text{glc-bD[c]} \rightleftharpoons \text{glc-D[c]}$                                     | 1   | (BT_0372 or BT_0356 or BT_2849 or BT_3529 or BT_3532)                                                                                                                                                                                                                                                   | -1000 | 1000 | 2  | Alternate Carbon Metabolism |                              |                                                               | 5.1.3.3   |

| SEED Rxn ID | BIGG Rxn ID             | Function                                                              | Formula                                                  | Rev | GA      | LB | UB   | CS | Subsystem               | Reference                                                                      | Notes                                                                                                                                                                                                                                                                                              | EC Number |
|-------------|-------------------------|-----------------------------------------------------------------------|----------------------------------------------------------|-----|---------|----|------|----|-------------------------|--------------------------------------------------------------------------------|----------------------------------------------------------------------------------------------------------------------------------------------------------------------------------------------------------------------------------------------------------------------------------------------------|-----------|
|             | GALNACASE_O<br>GLYCAN1e | N-acetylgalactosaminidase<br>, mucin-type O-glycans,<br>extracellular | h2o[e] +<br>Tn_antigen[e]<br>=> acgal[e] +<br>Ser_Thr[e] | 0   | BT_0065 | 0  | 1000 | 4  | O-Glycan<br>Degradation | PMID:<br>19403529,<br>PMID:<br>18996345,<br>PMID:<br>10430883,<br>PMID: 848954 | B. thetaiotaomicron is<br>well known to<br>degrade mucin. The<br>subsystem "O-Glycan<br>Biosynthesis" in<br>Recon1 represents<br>mucin biosynthesis.<br>BT_0065 is N-<br>acetylgalactosaminid<br>ase according to<br>PMID: 19403529.<br>There may be other<br>enzymes performing<br>this function. |           |
|             | GALNACASE_O<br>GLYCAN2e | N-acetylgalactosaminidase<br>, mucin-type O-glycans,<br>extracellular | h2o[e] + core5[e]<br>=> acgal[e] +<br>Tn_antigen[e]      | 0   | BT_0065 | 0  | 1000 | 4  | O-Glycan<br>Degradation | PMID:<br>19403529,<br>PMID:<br>18996345,<br>PMID:<br>10430883,<br>PMID: 848954 | B. thetaiotaomicron is<br>well known to<br>degrade mucin. The<br>subsystem "O-Glycan<br>Biosynthesis" in<br>Recon1 represents<br>mucin biosynthesis.<br>BT_0065 is N-<br>acetylgalactosaminid<br>ase according to<br>PMID: 19403529.<br>There may be other<br>enzymes performing<br>this function. |           |
|             | GALNACASE_O<br>GLYCAN3e | N-acetylgalactosaminidase<br>, mucin-type O-glycans,<br>extracellular | h2o[e] + core7[e]<br>=> acgal[e] +<br>Tn_antigen[e]      | 0   | BT_0065 | 0  | 1000 | 4  | O-Glycan<br>Degradation | PMID:<br>19403529,<br>PMID:<br>18996345,<br>PMID:<br>10430883,<br>PMID: 848954 | B. thetaiotaomicron is<br>well known to<br>degrade mucin. The<br>subsystem "O-Glycan<br>Biosynthesis" in<br>Recon1 represents<br>mucin biosynthesis.<br>BT_0065 is N-<br>acetylgalactosaminid<br>ase according to<br>PMID: 19403529.<br>There may be other<br>enzymes performing<br>this function. |           |

| SEED Rxn ID | BIGG Rxn ID   | Function                                                   | Formula                                                                                                             | Rev | GA                                                               | LB    | UB   | CS | Subsystem                        | Reference                                  | Notes                                                                                                                                                                                                      | EC Number |
|-------------|---------------|------------------------------------------------------------|---------------------------------------------------------------------------------------------------------------------|-----|------------------------------------------------------------------|-------|------|----|----------------------------------|--------------------------------------------|------------------------------------------------------------------------------------------------------------------------------------------------------------------------------------------------------------|-----------|
|             | GALOX         | Galactose oxidase                                          | $\text{h2o}[c] + \text{o2}[c] + \text{gal}[c] \rightleftharpoons \text{h}[c] + \text{h2o2}[c] + \text{galctn-D}[c]$ | 1   | BT_4040 or BT_4632                                               | -1000 | 1000 | 2  | Alternate Carbon Metabolism      | PMID: 22036470                             | Reaction R01098 in KEGG. The gene may be wrongly annotated and have a different function (upregulated during growth on human milk oligosaccharides).                                                       | 1.1.3.9   |
| rxn00817    | GALS3         | a-galactosidase (melibiose)                                | $\text{h2o}[c] + \text{melib}[c] \Rightarrow \text{glc-D}[c] + \text{gal}[c]$                                       | 0   | (BT_1871 or BT_2851 or BT_3065 or BT_3131 or BT_3133 or BT_3410) | 0     | 1000 | 4  | Plant Polysaccharide Degradation | PMID:19646996, PMID:18848471, PMID:2557798 | Growth on melibiose was demonstrated for B. thetaiotaomicron.                                                                                                                                              | 3.2.1.22  |
| rxn05566    | GALt2_2       | D-galactose transport in via proton symport                | $\text{h}[e] + \text{gal}[e] \rightleftharpoons \text{h}[c] + \text{gal}[c]$                                        | 1   | (BT_3589 or BT_1758 or BT_0371 or BT_4311 or BT_4653)            | -1000 | 1000 | 4  | Transport, Extracellular         | i.e. PMID: 16887504                        | Annotation based on NCBI Gene (last updated 14.05.11). B. thetaiotaomicron grows on galactose.                                                                                                             |           |
|             | GALUi         | UTP-glucose-1-phosphate uridylyltransferase (irreversible) | $\text{h}[c] + \text{utp}[c] + \text{glp}[c] \Rightarrow \text{ppi}[c] + \text{udpg}[c]$                            | 0   |                                                                  | 0     | 1000 | 2  | Cell Envelope Biosynthesis       | PMID:19460428                              | This reaction is necessary to produce UDP-glucose for lipopolysaccharide biosynthesis. No gene annotation is available, however. The structure of B. thetaiotaomicron LPS is described in PMID:19460428.   | 2.7.7.9   |
| rxn05673    | GALURt2r      | galacturonate transport in via proton symport              | $\text{h}[c] + \text{galur}[c] \rightleftharpoons \text{h}[e] + \text{galur}[e]$                                    | 1   | BT_4105                                                          | -1000 | 1000 | 2  | Transport, Extracellular         | PMID:563214                                | B. thetaiotaomicron grows on galacturonate as sole carbon source.                                                                                                                                          |           |
|             | GAM2STASE_HS1 | N-sulfoglucosamine sulfohydrolase, heparin degradation     | $2 \text{h2o}[e] + \text{gam26s}[e] \Rightarrow \text{h}[e] + 2 \text{so4}[e] + \text{gam}[e]$                      | 0   | ((BT_1624 and BT_0238) or (BT_3796 and BT_0238))                 | 0     | 1000 | 3  | Glycosaminoglycan Degradation    | PMID:21507958, PMID:19801541, PMID:7574611 | B. thetaiotaomicron specific putative heparin sulfate degradation pathway. Requires sulfatase-maturing enzyme (BT_0238) to be functional. Not sure if annotation (putative secreted sulfatase) is correct. | 3.10.1.1  |

| SEED Rxn ID | BIGG Rxn ID       | Function                                                         | Formula                                                                     | Rev | GA                                                           | LB    | UB   | CS | Subsystem                                          | Reference                      | Notes                                                                                                                                                         | EC Number |
|-------------|-------------------|------------------------------------------------------------------|-----------------------------------------------------------------------------|-----|--------------------------------------------------------------|-------|------|----|----------------------------------------------------|--------------------------------|---------------------------------------------------------------------------------------------------------------------------------------------------------------|-----------|
|             | GAM2STASE_HS<br>2 | N-sulfoglucosamine<br>sulfohydrolase, heparin<br>degradation     | 2 h2o[e] +<br>hspg_degr_5[e]<br>=> 2 h[e] + 2<br>so4[e] +<br>hspg_degr_6[e] | 0   | ((BT_1624<br>and BT_0238)<br>or (BT_3796<br>and<br>BT_0238)) | 0     | 1000 | 2  | Glycosaminogl<br>ycan<br>Degradation               | PMID:19801541,<br>PMID:7574611 | B. thetaiotaomicron<br>specific putative<br>heparin sulfate<br>degradation pathway.<br>Not sure if annotation<br>(putative secreted<br>sulfatase) is correct. | 3.10.1.1  |
|             | GAM2STASE_HS<br>3 | N-sulfoglucosamine<br>sulfohydrolase, heparin<br>degradation     | h2o[e] +<br>hspg_degr_10[e]<br>=> h[e] + so4[e]<br>+<br>hspg_degr_11[e]     | 0   | ((BT_1624<br>and BT_0238)<br>or (BT_3796<br>and<br>BT_0238)) | 0     | 1000 | 2  | Glycosaminogl<br>ycan<br>Degradation               | PMID:19801541,<br>PMID:7574611 | B. thetaiotaomicron<br>specific putative<br>heparin sulfate<br>degradation pathway.<br>Not sure if annotation<br>(putative secreted<br>sulfatase) is correct. | 3.10.1.1  |
|             | GAMt2r            | glucosamine transport<br>(proton symport)                        | h[e] + gam[e]<br><=> h[c] +<br>gam[c]                                       | 1   |                                                              | -1000 | 1000 | 2  | Transport,<br>Extracellular                        | PMID:7240086                   | B. thetaiotaomicron<br>metabolizes<br>glucosamine.                                                                                                            |           |
| rxn00781    | GAPD              | glyceraldehyde-3-<br>phosphate<br>dehydrogenase                  | pi[c] + nad[c] +<br>g3p[c] <=> h[c]<br>+ nadh[c] +<br>13dpg[c]              | 1   | BT_4263                                                      | -1000 | 1000 | 4  | Glycolysis/Glu<br>coneogenesis                     | PMID: 11260473                 | Activity measured by<br>enzyme assay in B.<br>thetaiotaomicron.                                                                                               | 1.2.1.12  |
| rxn03004    | GARFTi            | phosphoribosylglycina<br>mide formyltransferase,<br>irreversible | 10fthf[c] + gar[c]<br>=> h[c] + thf[c] +<br>fgam[c]                         | 0   | (BT_2883 or<br>BT_3360)                                      | 0     | 1000 | 2  | Purine and<br>Pyrimidine<br>Biosynthesis           |                                |                                                                                                                                                               | 2.1.2.2   |
| rxn04783    | GART              | GAR transformylase-T                                             | atp[c] + for[c] +<br>gar[c] => h[c] +<br>pi[c] + adp[c] +<br>fgam[c]        | 0   | BT_0704                                                      | 0     | 1000 | 2  | Purine and<br>Pyrimidine<br>Biosynthesis           |                                |                                                                                                                                                               | 2.1.2.-   |
| rxn06377    | GCCa              | glycine-cleavage<br>complex                                      | h[c] + gly[c] +<br>lpro[c] =><br>co2[c] + alpro[c]                          | 0   | BT_1147                                                      | 0     | 1000 | 2  | Glycine,<br>Serine, and<br>Threonine<br>Metabolism |                                |                                                                                                                                                               | 1.4.4.2   |
| rxn06600    | GCCb              | glycine cleavage<br>complex                                      | thf[c] + alpro[c]<br>=> nh4[c] +<br>dhlpro[c] +<br>mlthf[c]                 | 0   | (BT_2519 and<br>BT_4584)                                     | 0     | 1000 | 2  | Glycine,<br>Serine, and<br>Threonine<br>Metabolism |                                |                                                                                                                                                               | 2.1.2.10  |
| rxn06493    | GCCc              | glycine-cleavage<br>complex                                      | nad[c] +<br>dhlpro[c] =><br>h[c] + nadh[c] +<br>lpro[c]                     | 0   | (BT_2519 or<br>BT_3186 or<br>(BT_1147 and<br>BT_2519))       | 0     | 1000 | 2  | Glycine,<br>Serine, and<br>Threonine<br>Metabolism |                                | Reversible in SEED                                                                                                                                            | 1.8.1.4   |

| SEED Rxn ID | BIGG Rxn ID | Function                                      | Formula                                                | Rev | GA                   | LB    | UB   | CS | Subsystem                                  | Reference                                                                                                                            | Notes                                                                                                                                   | EC Number |
|-------------|-------------|-----------------------------------------------|--------------------------------------------------------|-----|----------------------|-------|------|----|--------------------------------------------|--------------------------------------------------------------------------------------------------------------------------------------|-----------------------------------------------------------------------------------------------------------------------------------------|-----------|
|             | GCHOLAH     | Bile acid hydrolase (glycocholate)            | h2o[c] + gchola[c] => h[c] + cholate[c] + gly[c]       | 0   | (BT_1259 or BT_2086) | 0     | 1000 | 4  | Bile Acid Metabolism                       | PMID:10993, Dworkin, M. and S. Falkow (2006). The prokaryotes : a handbook on the biology of bacteria. New York ; [London], Springer | Enzyme was demonstrated experimentally (PMID:10993). Growth of B. thetaiotaomicron is stimulated by 20% bile.                           | 3.5.1.24  |
|             | GCHOLAt2    | glycocholate transport via sodium cotransport | 2 na1[e] + gchola[e] => 2 na1[c] + gchola[c]           | 0   |                      | 0     | 1000 | 2  | Transport, Extracellular                   | PMID:10993                                                                                                                           | B. thetaiotaomicron metabolizes glycocholate and taurocholate. A bile acid/ sodium symporter is annotated for Bacteroides salanitronis. |           |
| rxn00555    | GF6PTAr     | Glutamine-fructose-6-phosphate transaminase   | gln-L[c] + f6p[c] <=> glu-L[c] + gam6p[c]              | 1   | BT_0554              | -1000 | 1000 | 2  | Aminosugar Metabolism                      |                                                                                                                                      |                                                                                                                                         | 2.6.1.16  |
| rxn03962    | GFUCS       | GDP-L-fucose synthase                         | h[c] + nadph[c] + gdpddman[c] => nadp[c] + gdpfuc[c]   | 0   | BT_1225              | 0     | 1000 | 4  | Alternate Carbon Metabolism                | DOI: 10.1007/s10068-010-0120-0                                                                                                       | Gene was cloned and gene product was characterized.                                                                                     | 1.1.1.271 |
| rxn05287    | GGTT        | geranylgeranyltranstransferase                | ipdp[c] + ggdp[c] => ppi[c] + pendp[c]                 | 0   | (BT_3261 or BT_2058) | 0     | 1000 | 2  | Cofactor and Prosthetic Group Biosynthesis |                                                                                                                                      |                                                                                                                                         |           |
| rxn00692    | GHMT2r      | glycine hydroxymethyltransferase, reversible  | thf[c] + ser-L[c] <=> h2o[c] + gly[c] + mlthf[c]       | 1   | BT_0738              | -1000 | 1000 | 2  | Glycine, Serine, and Threonine Metabolism  |                                                                                                                                      |                                                                                                                                         | 2.1.2.1   |
| rxn00239    | GK1         | guanylate kinase (GMP:ATP)                    | atp[c] + gmp[c] <=> adp[c] + gdp[c]                    | 1   | BT_2009              | -1000 | 1000 | 2  | Nucleotide Salvage Pathway                 |                                                                                                                                      |                                                                                                                                         | 2.7.4.8   |
| rxn09562    | GK2         | guanylate kinase (GMPdATP)                    | datp[c] + gmp[c] <=> gdp[c] + dadp[c]                  | 1   | BT_2009              | -1000 | 1000 | 2  | Nucleotide Salvage Pathway                 |                                                                                                                                      |                                                                                                                                         | 2.7.4.8   |
|             | GLCAASE_HSe | Beta-glucuronidase, heparin degradation       | h2o[e] + hspg_degr_12[e] => glcur[e] + hspg_degr_13[e] | 0   | (BT_3292 or BT_4151) | 0     | 1000 | 4  | Glycosaminoglycan Degradation              | PMID:19801541, PMID:7574611                                                                                                          | B. thetaiotaomicron specific putative heparin sulfate degradation pathway.                                                              | 3.2.1.31  |

| SEED Rxn ID | BIGG Rxn ID | Function                                      | Formula                                               | Rev | GA                      | LB | UB   | CS | Subsystem                        | Reference                     | Notes                                                                                                                                                    | EC Number |
|-------------|-------------|-----------------------------------------------|-------------------------------------------------------|-----|-------------------------|----|------|----|----------------------------------|-------------------------------|----------------------------------------------------------------------------------------------------------------------------------------------------------|-----------|
|             | GLCAASE8e   | beta-glucuronidase,<br>hyaluronan degradation | h2o[e] + ha[e]<br>=> glcur[e] +<br>ha_deg1[e]         | 0   | (BT_3292 or<br>BT_4151) | 0  | 1000 | 4  | Glycosaminoglycan<br>Degradation | PMID:848954,<br>PMID:18996345 | B. thetaiotaomicron<br>ferments hyaluronan.<br>The polysaccharide<br>utilization locus<br>(PUL) BT3324 -<br>BT3350 is<br>upregulated in its<br>presence. | 3.2.1.31  |
|             | GLCAASE9e   | beta-glucuronidase,<br>hyaluronan degradation | 2 h2o[e] +<br>ha_pre1[e] =><br>acgam[e] +<br>glcur[e] | 0   | (BT_3292 or<br>BT_4151) | 0  | 1000 | 4  | Glycosaminoglycan<br>Degradation | PMID:848954,<br>PMID:18996345 | B. thetaiotaomicron<br>ferments hyaluronan.<br>The polysaccharide<br>utilization locus<br>(PUL) BT3324 -<br>BT3350 is<br>upregulated in its<br>presence. | 3.2.1.31  |

| SEED Rxn ID | BIGG Rxn ID       | Function                                                  | Formula                                                              | Rev | GA                                                  | LB | UB   | CS | Subsystem                        | Reference                                                       | Notes                                                                                                                                                                                                                                                                                                                                                                                                                                                                                                                                                                                                                                               | EC Number |
|-------------|-------------------|-----------------------------------------------------------|----------------------------------------------------------------------|-----|-----------------------------------------------------|----|------|----|----------------------------------|-----------------------------------------------------------------|-----------------------------------------------------------------------------------------------------------------------------------------------------------------------------------------------------------------------------------------------------------------------------------------------------------------------------------------------------------------------------------------------------------------------------------------------------------------------------------------------------------------------------------------------------------------------------------------------------------------------------------------------------|-----------|
|             | GLCAASEe          | beta-glucuronidase/<br>chondroitinase                     | h2o[e] +<br>acgalglcur[e] =><br>acgal[e] +<br>glcur[e]               | 0   | (BT_3292 or<br>BT_4151 or<br>BT_3324 or<br>BT_3350) | 0  | 1000 | 4  | Glycosaminoglycan<br>Degradation | PMID:6782076,<br>PMID:7574611,<br>PMID:848954,<br>PMID:18996345 | B. thetaiotaomicron<br>ferments chondroitin<br>sulfate. The<br>polysaccharide<br>utilization locus<br>(PUL) BT3324 -<br>BT3350 is<br>upregulated in its<br>presence. BT_3348<br>degrades chondroitin<br>sulfate to<br>oligosaccharides,<br>which requires<br>BT_3331 (sus C<br>homolog) and<br>BT_3332 (csuF).<br>BT_3324 and<br>BT_3350 degrade the<br>desulfated<br>oligosaccharides to<br>monosaccharides.<br>Based on Figure 3,<br>PMID:18996345.<br>BT_3292 and<br>BT_4151 were added<br>based on gene<br>annotation, not sure<br>they perform this<br>role. Reaction takes<br>place in periplasm<br>(extracellular for<br>modeling purposes). | 3.2.1.31  |
|             | GLCNACASE_HS<br>1 | Alpha-N-<br>acetylglucosaminidase,<br>heparin degradation | 2 h2o[e] + 2 h[e]<br>+ hspg_degr_6[e]<br>=> 2 acgam[e] +<br>glcur[e] | 0   | (BT_0438 or<br>BT_3590 or<br>BT_4359)               | 0  | 1000 | 4  | Glycosaminoglycan<br>Degradation | PMID:19801541,<br>PMID:7574611                                  | B. thetaiotaomicron<br>specific putative<br>heparin sulfate<br>degradation pathway.                                                                                                                                                                                                                                                                                                                                                                                                                                                                                                                                                                 | 3.2.1.50  |
|             | GLCNACASE_HS<br>2 | Alpha-N-<br>acetylglucosaminidase,<br>heparin degradation | h2o[e] + h[e] +<br>hspg_degr_11[e]<br>=> gam[e] +<br>hspg_degr_12[e] | 0   | (BT_0438 or<br>BT_3590 or<br>BT_4359)               | 0  | 1000 | 4  | Glycosaminoglycan<br>Degradation | PMID:19801541,<br>PMID:7574611                                  | B. thetaiotaomicron<br>specific putative<br>heparin sulfate<br>degradation pathway.                                                                                                                                                                                                                                                                                                                                                                                                                                                                                                                                                                 | 3.2.1.50  |
|             | GLCNACASE_HS<br>3 | Alpha-N-<br>acetylglucosaminidase,<br>heparin degradation | h2o[e] +<br>hspg_degr_13[e]<br>=> acgam[e] +<br>hspg_degr_14[e]      | 0   | (BT_0438 or<br>BT_3590 or<br>BT_4359)               | 0  | 1000 | 4  | Glycosaminoglycan<br>Degradation | PMID:19801541,<br>PMID:7574611                                  | B. thetaiotaomicron<br>specific putative<br>heparin sulfate<br>degradation pathway.                                                                                                                                                                                                                                                                                                                                                                                                                                                                                                                                                                 | 3.2.1.50  |

| SEED Rxn ID | BIGG Rxn ID             | Function                                                     | Formula                                          | Rev | GA                                                                                                                                                                                                                                                                                                                                                                                                                                                                                                                                                                             | LB | UB   | CS | Subsystem               | Reference                                                | Notes                                                                                                                                                                                                                                                                     | EC Number |
|-------------|-------------------------|--------------------------------------------------------------|--------------------------------------------------|-----|--------------------------------------------------------------------------------------------------------------------------------------------------------------------------------------------------------------------------------------------------------------------------------------------------------------------------------------------------------------------------------------------------------------------------------------------------------------------------------------------------------------------------------------------------------------------------------|----|------|----|-------------------------|----------------------------------------------------------|---------------------------------------------------------------------------------------------------------------------------------------------------------------------------------------------------------------------------------------------------------------------------|-----------|
|             | GLCNACASE_OG<br>LYCAN1e | N-acetylglucosaminidase, mucin-type O-glycans, extracellular | h2o[e] + core6[e]<br>=> acgam[e] + Tn_antigen[e] | 0   | (BT_2825 or<br>BT_1038 or<br>BT_1044 or<br>BT_1048 or<br>BT_0865 or<br>BT_1282 or<br>BT_3753 or<br>BT_4132 or<br>BT_4406 or<br>BT_3985 or<br>BT_3987) and<br>((BT_1039<br>and BT_1040)<br>or (BT_1042<br>and BT_1043)<br>or (BT_1046<br>and BT_1047)<br>or (BT_4134<br>and BT_4135)<br>or (BT_4404<br>and BT_4405)<br>or (BT_3983<br>and BT_3984)<br>or (BT_0866<br>and BT_0867)<br>or (BT_3751<br>and BT_3752)<br>or (BT_1280<br>and BT_1281)<br>or (BT_3958<br>and BT_3959)<br>or (BT_4633<br>and BT_4634)<br>or (BT_2818<br>and BT_2819)<br>or (BT_2820<br>and<br>BT_2821)) | 0  | 1000 | 4  | O-Glycan<br>Degradation | PMID:<br>18996345,<br>PMID:<br>10430883,<br>PMID: 848954 | B. thetaiotaomicron is well known to degrade mucin, the genes included in the GPR are upregulated during growth on mucin. The subsystem "O-Glycan Biosynthesis" in Recon1 represents mucin biosynthesis. Involves N-acetylglucosaminidase, susC, susD (binding proteins). |           |

| SEED Rxn ID | BIGG Rxn ID             | Function                                                     | Formula                                                                           | Rev | GA                                                                                                                                                                                                                                                                                                                                                                                                                                                                                                                                                                             | LB | UB   | CS | Subsystem               | Reference                                                | Notes                                                                                                                                                                                                                                                                     | EC Number |
|-------------|-------------------------|--------------------------------------------------------------|-----------------------------------------------------------------------------------|-----|--------------------------------------------------------------------------------------------------------------------------------------------------------------------------------------------------------------------------------------------------------------------------------------------------------------------------------------------------------------------------------------------------------------------------------------------------------------------------------------------------------------------------------------------------------------------------------|----|------|----|-------------------------|----------------------------------------------------------|---------------------------------------------------------------------------------------------------------------------------------------------------------------------------------------------------------------------------------------------------------------------------|-----------|
|             | GLCNACASE_OG<br>LYCAN2e | N-acetylglucosaminidase, mucin-type O-glycans, extracellular | $\text{h2o[e]} + \text{gncore2[e]} \Rightarrow \text{acgam[e]} + \text{core2[e]}$ | 0   | (BT_2825 or<br>BT_1038 or<br>BT_1044 or<br>BT_1048 or<br>BT_0865 or<br>BT_1282 or<br>BT_3753 or<br>BT_4132 or<br>BT_4406 or<br>BT_3985 or<br>BT_3987) and<br>((BT_1039<br>and BT_1040)<br>or (BT_1042<br>and BT_1043)<br>or (BT_1046<br>and BT_1047)<br>or (BT_4134<br>and BT_4135)<br>or (BT_4404<br>and BT_4405)<br>or (BT_3983<br>and BT_3984)<br>or (BT_0866<br>and BT_0867)<br>or (BT_3751<br>and BT_3752)<br>or (BT_1280<br>and BT_1281)<br>or (BT_3958<br>and BT_3959)<br>or (BT_4633<br>and BT_4634)<br>or (BT_2818<br>and BT_2819)<br>or (BT_2820<br>and<br>BT_2821)) | 0  | 1000 | 4  | O-Glycan<br>Degradation | PMID:<br>18996345,<br>PMID:<br>10430883,<br>PMID: 848954 | B. thetaiotaomicron is well known to degrade mucin, the genes included in the GPR are upregulated during growth on mucin. The subsystem "O-Glycan Biosynthesis" in Recon1 represents mucin biosynthesis. Involves N-acetylglucosaminidase, susC, susD (binding proteins). |           |

| SEED Rxn ID | BIGG Rxn ID             | Function                                                     | Formula                                         | Rev | GA                                                                                                                                                                                                                                                                                                                                                                                                                                                                                                                                                                             | LB | UB   | CS | Subsystem               | Reference                                                | Notes                                                                                                                                                                                                                                                                     | EC Number |
|-------------|-------------------------|--------------------------------------------------------------|-------------------------------------------------|-----|--------------------------------------------------------------------------------------------------------------------------------------------------------------------------------------------------------------------------------------------------------------------------------------------------------------------------------------------------------------------------------------------------------------------------------------------------------------------------------------------------------------------------------------------------------------------------------|----|------|----|-------------------------|----------------------------------------------------------|---------------------------------------------------------------------------------------------------------------------------------------------------------------------------------------------------------------------------------------------------------------------------|-----------|
|             | GLCNACASE_OG<br>LYCAN3e | N-acetylglucosaminidase, mucin-type O-glycans, extracellular | h2o[e] + core2[e]<br>=> acgam[e] + T_antigen[e] | 0   | (BT_2825 or<br>BT_1038 or<br>BT_1044 or<br>BT_1048 or<br>BT_0865 or<br>BT_1282 or<br>BT_3753 or<br>BT_4132 or<br>BT_4406 or<br>BT_3985 or<br>BT_3987) and<br>((BT_1039<br>and BT_1040)<br>or (BT_1042<br>and BT_1043)<br>or (BT_1046<br>and BT_1047)<br>or (BT_4134<br>and BT_4135)<br>or (BT_4404<br>and BT_4405)<br>or (BT_3983<br>and BT_3984)<br>or (BT_0866<br>and BT_0867)<br>or (BT_3751<br>and BT_3752)<br>or (BT_1280<br>and BT_1281)<br>or (BT_3958<br>and BT_3959)<br>or (BT_4633<br>and BT_4634)<br>or (BT_2818<br>and BT_2819)<br>or (BT_2820<br>and<br>BT_2821)) | 0  | 1000 | 4  | O-Glycan<br>Degradation | PMID:<br>18996345,<br>PMID:<br>10430883,<br>PMID: 848954 | B. thetaiotaomicron is well known to degrade mucin, the genes included in the GPR are upregulated during growth on mucin. The subsystem "O-Glycan Biosynthesis" in Recon1 represents mucin biosynthesis. Involves N-acetylglucosaminidase, susC, susD (binding proteins). |           |

| SEED Rxn ID | BIGG Rxn ID             | Function                                                     | Formula                                        | Rev | GA                                                                                                                                                                                                                                                                                                                                                                                                                                                              | LB | UB   | CS | Subsystem            | Reference                                    | Notes                                                                                                                                                                                                                                                                     | EC Number |
|-------------|-------------------------|--------------------------------------------------------------|------------------------------------------------|-----|-----------------------------------------------------------------------------------------------------------------------------------------------------------------------------------------------------------------------------------------------------------------------------------------------------------------------------------------------------------------------------------------------------------------------------------------------------------------|----|------|----|----------------------|----------------------------------------------|---------------------------------------------------------------------------------------------------------------------------------------------------------------------------------------------------------------------------------------------------------------------------|-----------|
|             | GLCNACASE_OG<br>LYCAN4e | N-acetylglucosaminidase, mucin-type O-glycans, extracellular | h2o[e] + gncore1[e] => acgam[e] + T_antigen[e] | 0   | (BT_2825 or BT_1038 or BT_1044 or BT_1048 or BT_0865 or BT_1282 or BT_3753 or BT_4132 or BT_4406 or BT_3985 or BT_3987) and ((BT_1039 and BT_1040) or (BT_1042 and BT_1043) or (BT_1046 and BT_1047) or (BT_4134 and BT_4135) or (BT_4404 and BT_4405) or (BT_3983 and BT_3984) or (BT_0866 and BT_0867) or (BT_3751 and BT_3752) or (BT_1280 and BT_1281) or (BT_3958 and BT_3959) or (BT_4633 and BT_4634) or (BT_2818 and BT_2819) or (BT_2820 and BT_2821)) | 0  | 1000 | 4  | O-Glycan Degradation | PMID: 18996345, PMID: 10430883, PMID: 848954 | B. thetaiotaomicron is well known to degrade mucin, the genes included in the GPR are upregulated during growth on mucin. The subsystem "O-Glycan Biosynthesis" in Recon1 represents mucin biosynthesis. Involves N-acetylglucosaminidase, susC, susD (binding proteins). |           |

| SEED Rxn ID | BIGG Rxn ID             | Function                                                     | Formula                                  | Rev | GA                                                                                                                                                                                                                                                                                                                                                                                                                                                              | LB | UB   | CS | Subsystem            | Reference                                    | Notes                                                                                                                                                                                                                                                                     | EC Number |
|-------------|-------------------------|--------------------------------------------------------------|------------------------------------------|-----|-----------------------------------------------------------------------------------------------------------------------------------------------------------------------------------------------------------------------------------------------------------------------------------------------------------------------------------------------------------------------------------------------------------------------------------------------------------------|----|------|----|----------------------|----------------------------------------------|---------------------------------------------------------------------------------------------------------------------------------------------------------------------------------------------------------------------------------------------------------------------------|-----------|
|             | GLCNACASE_OG<br>LYCAN5e | N-acetylglucosaminidase, mucin-type O-glycans, extracellular | h2o[e] + core4[e] => acgam[e] + core3[e] | 0   | (BT_2825 or BT_1038 or BT_1044 or BT_1048 or BT_0865 or BT_1282 or BT_3753 or BT_4132 or BT_4406 or BT_3985 or BT_3987) and ((BT_1039 and BT_1040) or (BT_1042 and BT_1043) or (BT_1046 and BT_1047) or (BT_4134 and BT_4135) or (BT_4404 and BT_4405) or (BT_3983 and BT_3984) or (BT_0866 and BT_0867) or (BT_3751 and BT_3752) or (BT_1280 and BT_1281) or (BT_3958 and BT_3959) or (BT_4633 and BT_4634) or (BT_2818 and BT_2819) or (BT_2820 and BT_2821)) | 0  | 1000 | 4  | O-Glycan Degradation | PMID: 18996345, PMID: 10430883, PMID: 848954 | B. thetaiotaomicron is well known to degrade mucin, the genes included in the GPR are upregulated during growth on mucin. The subsystem "O-Glycan Biosynthesis" in Recon1 represents mucin biosynthesis. Involves N-acetylglucosaminidase, susC, susD (binding proteins). |           |

| SEED Rxn ID | BIGG Rxn ID             | Function                                                     | Formula                                       | Rev | GA                                                                                                                                                                                                                                                                                                                                                                                                                                                              | LB | UB   | CS | Subsystem                   | Reference                                    | Notes                                                                                                                                                                                                                                                                     | EC Number |
|-------------|-------------------------|--------------------------------------------------------------|-----------------------------------------------|-----|-----------------------------------------------------------------------------------------------------------------------------------------------------------------------------------------------------------------------------------------------------------------------------------------------------------------------------------------------------------------------------------------------------------------------------------------------------------------|----|------|----|-----------------------------|----------------------------------------------|---------------------------------------------------------------------------------------------------------------------------------------------------------------------------------------------------------------------------------------------------------------------------|-----------|
|             | GLCNACASE_OG<br>LYCAN6e | N-acetylglucosaminidase, mucin-type O-glycans, extracellular | h2o[e] + core3[e] => acgam[e] + Tn_antigen[e] | 0   | (BT_2825 or BT_1038 or BT_1044 or BT_1048 or BT_0865 or BT_1282 or BT_3753 or BT_4132 or BT_4406 or BT_3985 or BT_3987) and ((BT_1039 and BT_1040) or (BT_1042 and BT_1043) or (BT_1046 and BT_1047) or (BT_4134 and BT_4135) or (BT_4404 and BT_4405) or (BT_3983 and BT_3984) or (BT_0866 and BT_0867) or (BT_3751 and BT_3752) or (BT_1280 and BT_1281) or (BT_3958 and BT_3959) or (BT_4633 and BT_4634) or (BT_2818 and BT_2819) or (BT_2820 and BT_2821)) | 0  | 1000 | 4  | O-Glycan Degradation        | PMID: 18996345, PMID: 10430883, PMID: 848954 | B. thetaiotaomicron is well known to degrade mucin, the genes included in the GPR are upregulated during growth on mucin. The subsystem "O-Glycan Biosynthesis" in Recon1 represents mucin biosynthesis. Involves N-acetylglucosaminidase, susC, susD (binding proteins). |           |
| rxn05740    | GLCP                    | glycogen phosphorylase                                       | pi[c] + glycogen[c] => g1p[c]                 | 0   | (BT_1100 or BT_1293)                                                                                                                                                                                                                                                                                                                                                                                                                                            | 0  | 1000 | 3  | Alternate Carbon Metabolism | PMID:37285                                   | Glycogen synthesis was demonstrated in B. thetaiotaomicron.                                                                                                                                                                                                               | 2.4.1.1   |

| SEED Rxn ID | BIGG Rxn ID | Function                                            | Formula                                                        | Rev | GA                                                    | LB    | UB   | CS | Subsystem                       | Reference                                                                                                                | Notes                                                                                                                     | EC Number |
|-------------|-------------|-----------------------------------------------------|----------------------------------------------------------------|-----|-------------------------------------------------------|-------|------|----|---------------------------------|--------------------------------------------------------------------------------------------------------------------------|---------------------------------------------------------------------------------------------------------------------------|-----------|
|             | GLCS2       | glycogen synthase (UDPGlc)                          | udpg[c] => h[c] + udp[c] + glycogen[c]                         | 0   | (BT_1294 or BT_4307)                                  | 0     | 1000 | 3  | Alternate Carbon Metabolism     | PMID:37285                                                                                                               | Gene annotation from NCBI Gene (last updated 01.01.11). It was demonstrated that B. thetaiotaomicron produces a glycogen. | 2.4.1.11  |
|             | GLCt2r      | GLCt2r                                              | h[e] + glc-D[e] <=> h[c] + glc-D[c]                            | 1   | (BT_3589 or BT_1758 or BT_0371 or BT_4311 or BT_4653) | -1000 | 1000 | 4  | Transport, Extracellular        | PMID: 16887504                                                                                                           | B. thetaiotaomicron grows on glucose, does not utilize a phosphotransferase system for uptake. Annotation from KEGG.      |           |
|             | GLCt4       | glucose transport via sodium symport                | na1[e] + glc-D[e] <=> na1[c] + glc-D[c]                        | 1   | BT_0355                                               | -1000 | 1000 | 4  | Transport, Extracellular        | PMID: 4853401                                                                                                            | B. thetaiotaomicron uses glucose as sole carbon source.                                                                   |           |
| rxn05574    | GLCURt2r    | glucuronate transport in via proton symport         | h[e] + glcur[e] <=> h[c] + glcur[c]                            | 1   | BT_4105                                               | -1000 | 1000 | 4  | Transport, Extracellular        | PMID:7240086                                                                                                             | B. thetaiotaomicron grows on glucuronate as sole carbon source.                                                           |           |
| rxn00187    | GLNS        | glutamine synthetase                                | glu-L[c] + atp[c] + nh4[c] => h[c] + pi[c] + adp[c] + gln-L[c] | 0   | (BT_0453 or BT_0543 or BT_0785 or BT_4339)            | 0     | 1000 | 4  | Glutamate metabolism            | PMID:2576872                                                                                                             | Characterized for close relative B. fragilis.                                                                             | 6.3.1.2   |
|             | GLNt2r      | L-glutamine reversible transport via proton symport | h[e] + gln-L[e] <=> h[c] + gln-L[c]                            | 1   |                                                       | -1000 | 1000 | 1  | Transport, Extracellular        | Dworkin, M. and S. Falkow (2006). The prokaryotes : a handbook on the biology of bacteria. New York ; [London], Springer | B. thetaiotaomicron is weakly proteolytic, so a transport reaction for all amino acids is assumed to be present.          |           |
| rxn00179    | GLU5K       | glutamate 5-kinase                                  | glu-L[c] + atp[c] => adp[c] + glu5p[c]                         | 0   | BT_3719                                               | 0     | 1000 | 2  | Arginine and Proline Metabolism |                                                                                                                          | Reversible in SEED                                                                                                        | 2.7.2.11  |
| rxn10136    | GLUABUTt7   | 4-aminobutyrate/glutamate antiport                  | glu-L[e] + 4abut[c] <=> glu-L[c] + 4abut[e]                    | 1   | BT_2573                                               | -1000 | 1000 | 2  | Transport, Extracellular        |                                                                                                                          | Annotation from TransportDB (www.membranetransport.org).                                                                  |           |
| rxn00194    | GLUDC       | Glutamate Decarboxylase                             | h[c] + glu-L[c] => co2[c] + 4abut[c]                           | 0   | BT_2570                                               | 0     | 1000 | 2  | Glutamate Metabolism            |                                                                                                                          |                                                                                                                           | 4.1.1.15  |

| SEED Rxn ID | BIGG Rxn ID | Function                                                                  | Formula                                                            | Rev | GA                                                                                                | LB    | UB   | CS | Subsystem                          | Reference     | Notes                                                                                                                  | EC Number |
|-------------|-------------|---------------------------------------------------------------------------|--------------------------------------------------------------------|-----|---------------------------------------------------------------------------------------------------|-------|------|----|------------------------------------|---------------|------------------------------------------------------------------------------------------------------------------------|-----------|
| rxn00182    | GLUDxi      | glutamate dehydrogenase (NAD)                                             | h2o[c] + glu-L[c] + nad[c] => h[c] + akgl[c] + nadh[c] + nh4[c]    | 0   | (BT_1970 or BT_1973)                                                                              | 0     | 1000 | 2  | Glutamate Metabolism               | PMID: 8955404 | B. thetaiotaomicron has two glutamate dehydrogenases, one of which uses only NAD and one which uses both NAD and NADP. | 1.4.1.4   |
| rxn00184    | GLUDy       | glutamate dehydrogenase (NADP)                                            | h2o[c] + glu-L[c] + nadp[c] <=> h[c] + akgl[c] + nadph[c] + nh4[c] | 1   | BT_1970                                                                                           | -1000 | 1000 | 4  | Glutamate Metabolism               | PMID: 8955404 | B. thetaiotaomicron has two glutamate dehydrogenases, one of which uses only NAD and one which uses both NAD and NADP. | 1.4.1.4   |
| rxn01641    | GLUFORT     | Glutamate formiminotransferase (EC 2.1.2.5) @ Glutamate formyltransferase | glu-L[c] + 5forthf[c] <=> h[c] + thf[c] + forglu[c]                | 1   | BT_2693                                                                                           | -1000 | 1000 | 2  | Folate Metabolism                  |               |                                                                                                                        | 2.1.2.5   |
| rxn00189    | GLUN        | glutaminase                                                               | h2o[c] + gln-L[c] => glu-L[c] + nh4[c]                             | 0   | BT_2571                                                                                           | 0     | 1000 | 2  | Glutamate Metabolism               |               |                                                                                                                        | 3.5.1.2   |
| rxn00790    | GLUPRT      | glutamine phosphoribosyldiphosphate amidotransferase                      | h2o[c] + prpp[c] + gln-L[c] => glu-L[c] + ppi[c] + pram[c]         | 0   | (BT_0555 or BT_4582)                                                                              | 0     | 1000 | 2  | Purine and Pyrimidine Biosynthesis |               |                                                                                                                        | 2.4.2.14  |
| rxn00193    | GLUR        | glutamate racemase                                                        | glu-D[c] <=> glu-L[c]                                              | 1   | BT_3722                                                                                           | -1000 | 1000 | 2  | Cell Envelope Biosynthesis         |               |                                                                                                                        | 5.1.1.3   |
| rxn00085    | GLUSy       | glutamate synthase (NADPH)                                                | h[c] + akgl[c] + nadph[c] + gln-L[c] => 2 glu-L[c] + nadp[c]       | 0   | (BT_0552 and BT_0553)                                                                             | 0     | 1000 | 2  | Glutamate Metabolism               |               | Reversible in SEED                                                                                                     | 1.4.1.13  |
| rxn12645    | GLYASN1c    | Hydrolysis of Glycyl-L-asparagine                                         | h2o[c] + glyasn[c] <=> gly[c] + asn-L[c]                           | 1   | (BT_3464 or BT_3926 or BT_3996 or BT_0149 or BT_4193 or BT_3254 or BT_1260 or BT_1261 or BT_1314) | -1000 | 1000 | 2  | Peptide Degradation                |               |                                                                                                                        |           |
|             | GLYASNT     | Glycyl-L-asparagine transport via proton symport                          | h[e] + glyasn[e] => h[c] + glyasn[c]                               | 0   | (BT_0580 or BT_4385 or BT_1086)                                                                   | 0     | 1000 | 2  | Transport, Extracellular           |               | Genes added based on TransportDB (last consulted 06.06.12).                                                            |           |

| SEED Rxn ID | BIGG Rxn ID | Function                                        | Formula                                                                                                                                                                   | Rev | GA                                                                                                | LB    | UB   | CS | Subsystem                                 | Reference                                                                                                                               | Notes                                                                                                                                                                                           | EC Number |
|-------------|-------------|-------------------------------------------------|---------------------------------------------------------------------------------------------------------------------------------------------------------------------------|-----|---------------------------------------------------------------------------------------------------|-------|------|----|-------------------------------------------|-----------------------------------------------------------------------------------------------------------------------------------------|-------------------------------------------------------------------------------------------------------------------------------------------------------------------------------------------------|-----------|
| rxn12637    | GLYASP1c    | Hydrolysis of Glycyl-L-aspartate                | $\text{h2o}[\text{c}] + \text{glyasp}[\text{c}] \rightleftharpoons \text{asp-L}[\text{c}] + \text{gly}[\text{c}]$                                                         | 1   | (BT_3464 or BT_3926 or BT_3996 or BT_0149 or BT_4193 or BT_3254 or BT_1260 or BT_1261 or BT_1314) | -1000 | 1000 | 2  | Peptide Degradation                       |                                                                                                                                         |                                                                                                                                                                                                 |           |
|             | GLYASPt     | Glycyl-L-aspartate transport via proton symport | $\text{h}[\text{e}] + \text{glyasp}[\text{e}] \Rightarrow \text{h}[\text{c}] + \text{glyasp}[\text{c}]$                                                                   | 0   | (BT_0580 or BT_4385 or BT_1086)                                                                   | 0     | 1000 | 2  | Transport, Extracellular                  |                                                                                                                                         | Genes added based on TransportDB (last consulted 06.06.12).                                                                                                                                     |           |
| rxn00274    | GLYAT       | glycine C-acetyltransferase                     | $\text{accoa}[\text{c}] + \text{gly}[\text{c}] \rightleftharpoons \text{coa}[\text{c}] + 2\text{aobut}[\text{c}]$                                                         | 1   | BT_1371                                                                                           | -1000 | 1000 | 2  | Glycine, Serine, and Threonine Metabolism |                                                                                                                                         |                                                                                                                                                                                                 | 2.3.1.29  |
| rxn05181    | GLYBabc     | Glycine betaine transport via ABC system        | $\text{h2o}[\text{c}] + \text{atp}[\text{c}] + \text{glyb}[\text{e}] \Rightarrow \text{h}[\text{c}] + \text{pi}[\text{c}] + \text{adp}[\text{c}] + \text{glyb}[\text{c}]$ | 0   | (BT_1749 and BT_1750 and BT_1751)                                                                 | 0     | 1000 | 2  | Transport, Extracellular                  |                                                                                                                                         |                                                                                                                                                                                                 |           |
| rxn01102    | GLYCK       | glycerate kinase                                | $\text{atp}[\text{c}] + \text{glyc-R}[\text{c}] \Rightarrow \text{h}[\text{c}] + \text{adp}[\text{c}] + 3\text{pg}[\text{c}]$                                             | 0   | BT_1437                                                                                           | 0     | 1000 | 2  | Glycine, Serine, and Threonine Metabolism |                                                                                                                                         | Reversible reaction in Model SEED.                                                                                                                                                              | 2.7.1.31  |
|             | GLYCOe      | glycogen hydrolysis by samylases                | $1124 \text{ h2o}[\text{e}] + \text{glycogen}1500[\text{e}] \Rightarrow 750 \text{ glc-D}[\text{e}] + 375 \text{ malt}[\text{e}]$                                         | 0   | (BT_3698 and BT_3701 and BT_3702)                                                                 | 0     | 1000 | 3  | Alternate Carbon Metabolism               | Dworkin, M. and S. Falkow (2006). The prokaryotes : a handbook on the biology of bacteria. New York ; [London], Springer, PMID:16788175 | B. thetaiotaomicron ferments glycogen. In B. fragilis, glycogen utilization seems to be performed by the starch utilization operon. It is assumed this is also the case in B. thetaiotaomicron. |           |
| rxn01011    | GLYD        | glycerate dehydrogenase                         | $\text{h}[\text{c}] + \text{nadh}[\text{c}] + \text{hpyr}[\text{c}] \rightleftharpoons \text{nad}[\text{c}] + \text{glyc-R}[\text{c}]$                                    | 1   | BT_1207                                                                                           | -1000 | 1000 | 2  | Glycine, Serine, and Threonine Metabolism |                                                                                                                                         | Gene was annotated by Model SEED as phosphoglycerate oxidoreductase (EC 1.1.1.95). NCBI Gene (last updated 21.05.11) confirms annotation as glycerate dehydrogenase.                            | 1.1.1.29  |

| SEED Rxn ID | BIGG Rxn ID | Function                                        | Formula                                                                                            | Rev | GA                                                                                                | LB    | UB   | CS | Subsystem                      | Reference | Notes                                                        | EC Number |
|-------------|-------------|-------------------------------------------------|----------------------------------------------------------------------------------------------------|-----|---------------------------------------------------------------------------------------------------|-------|------|----|--------------------------------|-----------|--------------------------------------------------------------|-----------|
| rxn12646    | GLYGLN1c    | Hydrolysis of Glycyl-L-glutamine                | $\text{h2o[c]} + \text{glygln[c]} \rightleftharpoons \text{gln-L[c]} + \text{gly[c]}$              | 1   | (BT_3464 or BT_3926 or BT_3996 or BT_0149 or BT_4193 or BT_3254 or BT_1260 or BT_1261 or BT_1314) | -1000 | 1000 | 2  | Peptide Degradation            |           |                                                              |           |
|             | GLYGLNt     | Glycyl-L-glutamine transport via proton symport | $\text{h[e]} + \text{glygln[e]} \Rightarrow \text{h[c]} + \text{glygln[c]}$                        | 0   | (BT_0580 or BT_4385 or BT_1086)                                                                   | 0     | 1000 | 2  | Transport, Extracellular       |           | Genes added based on TransportDB (last consulted 06.06.12).  |           |
| rxn12634    | GLYGLU1c    | Hydrolysis of Glycyl-L-glutamate                | $\text{h2o[c]} + \text{glyglu[c]} \rightleftharpoons \text{glu-L[c]} + \text{gly[c]}$              | 1   | (BT_3464 or BT_3926 or BT_3996 or BT_0149 or BT_4193 or BT_3254 or BT_1260 or BT_1261 or BT_1314) | -1000 | 1000 | 2  | Peptide Degradation            |           |                                                              |           |
|             | GLYGLUt     | Glycyl-L-glutamate transport via proton symport | $\text{h[e]} + \text{glyglu[e]} \Rightarrow \text{h[c]} + \text{glyglu[c]}$                        | 0   | (BT_0580 or BT_4385 or BT_1086)                                                                   | 0     | 1000 | 2  | Transport, Extracellular       |           | Genes added based on TransportDB (last consulted 06.06.12).  |           |
|             | GLYGLYHi    | hydrolysis of glycylglycine, irreversible       | $\text{h2o[c]} + \text{glygly[c]} \Rightarrow 2 \text{ gly[c]}$                                    | 0   | (BT_3464 or BT_3926 or BT_3996 or BT_0149 or BT_4193 or BT_3254 or BT_1260 or BT_1261 or BT_1314) | 0     | 1000 | 2  | Peptide Degradation            |           |                                                              |           |
|             | GLYGLYt     | Glycylglycine transport                         | $\text{h[e]} + \text{glygly[e]} \rightleftharpoons \text{h[c]} + \text{glygly[c]}$                 | 1   | (BT_0580 or BT_4385 or BT_1086)                                                                   | -1000 | 1000 | 2  | Transport, Extracellular       |           | Genes added based on TransportDB (last consulted 06.06.12).  |           |
| rxn00615    | GLYKr       | glycerol kinase (reversible)                    | $\text{atp[c]} + \text{glyc[c]} \rightleftharpoons \text{h[c]} + \text{adp[c]} + \text{glyc3p[c]}$ | 1   |                                                                                                   | -1000 | 1000 | 1  | Glycerophospholipid Metabolism |           | Added by Model SEED during auto-completion step in pipeline. | 2.7.1.30  |

| SEED Rxn ID | BIGG Rxn ID  | Function                                                                 | Formula                                                                               | Rev | GA                                                                                                | LB    | UB   | CS | Subsystem                | Reference                   | Notes                                                                                                                                     | EC Number              |
|-------------|--------------|--------------------------------------------------------------------------|---------------------------------------------------------------------------------------|-----|---------------------------------------------------------------------------------------------------|-------|------|----|--------------------------|-----------------------------|-------------------------------------------------------------------------------------------------------------------------------------------|------------------------|
| rxn12845    | GLYLEUHYDROc | hydrolysis of Glycylleucine in the small intestine for cellular uptake   | $\text{h2o[c]} + \text{glyleu[c]} \rightleftharpoons \text{gly[c]} + \text{leu-L[e]}$ | 1   | (BT_3464 or BT_3926 or BT_3996 or BT_0149 or BT_4193 or BT_3254 or BT_1260 or BT_1261 or BT_1314) | -1000 | 1000 | 2  | Peptide Degradation      | PMID: 4074331, PMID: 964683 | BRENDA also lists beta-Ala-His dipeptidase (E.C. 3.4.13.20) as another enzyme catalyzing this reaction, but no literature evidence found. | 3.4.13.19 or 3.4.13.18 |
|             | GLYLEUHYDROe | hydrolysis of Glycylleucine by predicted non-cytosolic leucine peptidase | $\text{h2o[e]} + \text{glyleu[e]} \Rightarrow \text{gly[e]} + \text{leu-L[e]}$        | 0   | BT_2548                                                                                           | 0     | 1000 | 2  | Peptide Degradation      | PMID:12663928               | Predicted non-cytosolic in PMID:12663928. Assumed to be extracellular for modeling purposes.                                              | 3.4.11.15              |
| rxn12849    | GLYLEUPEPT1t | transport of Glycylleucine (extracellular)                               | $\text{h[e]} + \text{glyleu[e]} \Rightarrow \text{h[c]} + \text{glyleu[c]}$           | 0   | (BT_0580 or BT_4385 or BT_1086)                                                                   | 0     | 1000 | 2  | Transport, Extracellular |                             | Genes added based on TransportDB (last consulted 06.06.12).                                                                               |                        |
| rxn12635    | GLYMET1c     | Hydrolysis of Glycyl-L-methionine                                        | $\text{h2o[c]} + \text{glymet[c]} \rightleftharpoons \text{gly[c]} + \text{met-L[c]}$ | 1   | (BT_3464 or BT_3926 or BT_3996 or BT_0149 or BT_4193 or BT_3254 or BT_1260 or BT_1261 or BT_1314) | -1000 | 1000 | 2  | Peptide Degradation      |                             |                                                                                                                                           |                        |
|             | GLYMETt      | Glycyl-L-methionine transport via proton symport                         | $\text{h[e]} + \text{glymet[e]} \Rightarrow \text{h[c]} + \text{glymet[c]}$           | 0   | (BT_0580 or BT_4385 or BT_1086)                                                                   | 0     | 1000 | 2  | Transport, Extracellular |                             | Genes added based on TransportDB (last consulted 06.06.12).                                                                               |                        |
|             | GLYPHEHYi    | hydrolysis of glycylyphenylalanine, irreversible                         | $\text{h2o[c]} + \text{glyphe[c]} \Rightarrow \text{gly[c]} + \text{phe-L[c]}$        | 0   | (BT_3464 or BT_3926 or BT_3996 or BT_0149 or BT_4193 or BT_3254 or BT_1260 or BT_1261 or BT_1314) | 0     | 1000 | 2  | Peptide Degradation      |                             |                                                                                                                                           |                        |
|             | GLYPHEt      | Glycylyphenylalanine transport                                           | $\text{h[e]} + \text{glyphe[e]} \rightleftharpoons \text{h[c]} + \text{glyphe[c]}$    | 1   | (BT_0580 or BT_4385 or BT_1086)                                                                   | -1000 | 1000 | 2  | Transport, Extracellular |                             | Genes added based on TransportDB (last consulted 06.06.12).                                                                               |                        |

| SEED Rxn ID | BIGG Rxn ID | Function                                                                 | Formula                                                                                           | Rev | GA                                                                                                | LB    | UB   | CS | Subsystem                       | Reference                      | Notes                                                                                                 | EC Number |
|-------------|-------------|--------------------------------------------------------------------------|---------------------------------------------------------------------------------------------------|-----|---------------------------------------------------------------------------------------------------|-------|------|----|---------------------------------|--------------------------------|-------------------------------------------------------------------------------------------------------|-----------|
| rxn12638    | GLYPROPRO1c | hydrolysis of Prolylglycine in the small intestine for cellular uptake   | $\text{h2o[c]} + \text{glypro[c]} \rightleftharpoons \text{gly[c]} + \text{pro-L[c]}$             | 1   | (BT_3464 or BT_3926 or BT_3996 or BT_0149 or BT_4193 or BT_3254 or BT_1260 or BT_1261 or BT_1314) | -1000 | 1000 | 2  | Peptide Degradation             |                                |                                                                                                       | 3.4.13.9  |
|             | GLYPROPRO1e | hydrolysis of Glycylproline by predicted non-cytosolic proline peptidase | $\text{h2o[e]} + \text{glypro[e]} \Rightarrow \text{pro-L[e]} + \text{gly[e]}$                    | 0   | BT_0587                                                                                           | 0     | 1000 | 2  | Peptide Degradation             | PMID:12663928                  | Predicted non-cytosolic in PMID:12663928. Assumed to be extracellular for modeling purposes.          | 3.4.13.9  |
|             | GLYPROt     | Glycyl-L-proline transport via proton symport                            | $\text{h[e]} + \text{glypro[e]} \Rightarrow \text{h[c]} + \text{glypro[c]}$                       | 0   | (BT_0580 or BT_4385 or BT_1086)                                                                   | 0     | 1000 | 2  | Transport, Extracellular        |                                | Genes added based on TransportDB (last consulted 06.06.12).                                           |           |
| rxn05582    | GLYt2r      | glycine reversible transport via proton symport                          | $\text{h[e]} + \text{gly[e]} \rightleftharpoons \text{h[c]} + \text{gly[c]}$                      | 1   |                                                                                                   | -1000 | 1000 | 2  | Transport, Extracellular        |                                |                                                                                                       |           |
| rxn12847    | GLYTYR1c    | Hydrolysis of Glycyl-L-tyrosine                                          | $\text{h2o[c]} + \text{glytyr[c]} \rightleftharpoons \text{gly[c]} + \text{tyr-L[c]}$             | 1   | (BT_3464 or BT_3926 or BT_3996 or BT_0149 or BT_4193 or BT_3254 or BT_1260 or BT_1261 or BT_1314) | -1000 | 1000 | 2  | Peptide Degradation             |                                |                                                                                                       |           |
|             | GLYTYRt     | Glycyl-L-tyrosine transport via proton symport                           | $\text{h[e]} + \text{glytyr[e]} \Rightarrow \text{h[c]} + \text{glytyr[c]}$                       | 0   | (BT_0580 or BT_4385 or BT_1086)                                                                   | 0     | 1000 | 2  | Transport, Extracellular        |                                | Genes added based on TransportDB (last consulted 06.06.12).                                           |           |
| rxn00642    | GMAND       | GDP-D-mannose dehydratase                                                | $\text{gdpmann[c]} \Rightarrow \text{h2o[c]} + \text{gdpddman[c]}$                                | 0   | BT_1224                                                                                           | 0     | 1000 | 4  | Alternate Carbon Metabolism     | DOI: 10.1007/s10068-010-0120-0 | Gene was cloned and gene product was characterized.                                                   | 4.2.1.47  |
| rxn03916    | GMHEPAT     | D-glycero-D-mannohexose 1-phosphate adenyltransferase                    | $\text{h[c]} + \text{atp[c]} + \text{gmhep1p[c]} \Rightarrow \text{ppi[c]} + \text{adphep-DD[c]}$ | 0   |                                                                                                   | 0     | 1000 | 2  | Lipopolysaccharide Biosynthesis | PMID:20974832, PMID:19460428   | The structure of B. thetaiotaomicron LPS was studied, but the exact LPS synthesis pathway is unknown. |           |
| rxn03918    | GMHEPK      | D-glycero-D-mannohexose 7-phosphate kinase                               | $\text{atp[c]} + \text{gmhep7p[c]} \Rightarrow \text{h[c]} + \text{adp[c]} + \text{gmhep17bp[c]}$ | 0   |                                                                                                   | 0     | 1000 | 2  | Lipopolysaccharide Biosynthesis | PMID:20974832, PMID:19460428   | The structure of B. thetaiotaomicron LPS was studied, but the exact LPS synthesis pathway is unknown. |           |

| SEED Rxn ID | BIGG Rxn ID | Function                                                             | Formula                                                                             | Rev | GA                                                    | LB    | UB   | CS | Subsystem                                  | Reference     | Notes                                                     | EC Number |
|-------------|-------------|----------------------------------------------------------------------|-------------------------------------------------------------------------------------|-----|-------------------------------------------------------|-------|------|----|--------------------------------------------|---------------|-----------------------------------------------------------|-----------|
| rxn03919    | GMHEPPA     | D-glycero-D-manno-heptose 1,7-bisphosphate phosphatase               | h2o[c] + gmhep17bp[c] => pi[c] + gmhep1p[c]                                         | 0   | BT_0477                                               | 0     | 1000 | 4  | Lipopolysaccharide Biosynthesis            | PMID:20050615 | The enzyme was purified and enzyme kinetics were studied. |           |
| rxn00917    | GMPS2       | GMP synthase                                                         | h2o[c] + atp[c] + gln-L[c] + xmp[c] => 2 h[c] + glu-L[c] + amp[c] + ppi[c] + gmp[c] | 0   | (BT_2419 or BT_4265)                                  | 0     | 1000 | 2  | Purine and Pyrimidine Biosynthesis         |               |                                                           | 6.3.5.2   |
| rxn01115    | GND         | phosphogluconate dehydrogenase                                       | nadp[c] + 6pgc[c] => nadph[c] + co2[c] + ru5p-D[c]                                  | 0   | BT_1222                                               | 0     | 1000 | 4  | Pentose Phosphate Pathway                  | PMID: 7183748 | Presence of enzyme was demonstrated experimentally.       | 1.1.1.44  |
| rxn01226    | GNNUC       | gnnuc                                                                | h2o[c] + gsn[c] => rib-D[c] + gua[c]                                                | 0   | BT_2808                                               | 0     | 1000 | 2  | Nucleotide Salvage Pathway                 |               | Reversible in SEED                                        |           |
| rxn00758    | GPDDA1      | Glycerophosphodiester phosphodiesterase (Glycerophosphocholine)      | h2o[c] + g3pc[c] => h[c] + chol[c] + glyc3p[c]                                      | 0   | (BT_0442 or BT_0550 or BT_0195 or BT_3162 or BT_4727) | 0     | 1000 | 2  | Glycerophospholipid Metabolism             |               | BT_3162: Evidence at protein level (PDB entry 3i10)       | 3.1.4.46  |
| rxn01073    | GPDDA2      | Glycerophosphodiester phosphodiesterase (Glycerophosphoethanolamine) | h2o[c] + g3pe[c] => h[c] + glyc3p[c] + etha[c]                                      | 0   | (BT_0442 or BT_0550 or BT_0195 or BT_3162 or BT_4727) | 0     | 1000 | 2  | Glycerophospholipid Metabolism             |               | BT_3162: Evidence at protein level (PDB entry 3i10)       | 3.1.4.46  |
| rxn08669    | GPDDA4      | Glycerophosphodiester phosphodiesterase (Glycerophosphoglycerol)     | h2o[c] + g3pg[c] => h[c] + glyc[c] + glyc3p[c]                                      | 0   | (BT_0442 or BT_0550 or BT_0195 or BT_3162 or BT_4727) | 0     | 1000 | 2  | Glycerophospholipid Metabolism             |               | BT_3162: Evidence at protein level (PDB entry 3i10)       | 3.1.4.46  |
| rxn01466    | GRTT        | geranyltranstransferase                                              | ipdp[c] + grdp[c] => ppi[c] + frdp[c]                                               | 0   | (BT_3261 or BT_2058)                                  | 0     | 1000 | 2  | Cofactor and Prosthetic Group Biosynthesis |               |                                                           | 2.5.1.10  |
| rxn05204    | GSNt2r      | guanosine transport in via proton symport reversible                 | h[e] + gsn[e] <=> h[c] + gsn[c]                                                     | 1   | BT_4330                                               | -1000 | 1000 | 2  | Transport, Extracellular                   |               |                                                           |           |
| rxn00299    | GTPCI       | GTP cyclohydrolase I                                                 | h2o[c] + gtp[c] => h[c] + ahdt[c] + for[c]                                          | 0   | BT_3931                                               | 0     | 1000 | 2  | Cofactor and Prosthetic Group Biosynthesis |               |                                                           | 3.5.4.16  |

| SEED Rxn ID | BIGG Rxn ID | Function                                                          | Formula                                                            | Rev | GA                      | LB    | UB   | CS | Subsystem                                           | Reference     | Notes                                                                      | EC Number           |
|-------------|-------------|-------------------------------------------------------------------|--------------------------------------------------------------------|-----|-------------------------|-------|------|----|-----------------------------------------------------|---------------|----------------------------------------------------------------------------|---------------------|
| rxn00300    | GTPCII      | GTP cyclohydrolase II                                             | 3 h2o[c] + gtp[c]<br>=> 2 h[c] +<br>ppi[c] + for[c] +<br>25dhpp[c] | 0   | BT_2416                 | 0     | 1000 | 2  | Cofactor and<br>Prosthetic<br>Group<br>Biosynthesis |               |                                                                            | 3.5.4.25            |
|             | GTPDPDP     | guanosine-5'-<br>triphosphate,3'-<br>diphosphate<br>diphosphatase | h2o[c] + gdptp[c]<br>=> h[c] + pi[c] +<br>ppgpp[c]                 | 0   | BT_0540                 | 0     | 1000 | 2  | Cofactor and<br>Prosthetic<br>Group<br>Biosynthesis |               | Included based on<br>KEGG and NCBI<br>putative gene<br>annotation.         | 3.6.1.40            |
| rxn00303    | GTPDPK      | GTP diphosphokinase                                               | atp[c] + gtp[c]<br>=> h[c] + amp[c]<br>+ gdptp[c]                  | 0   | (BT_0700 or<br>BT_3998) | 0     | 1000 | 2  | Cofactor and<br>Prosthetic<br>Group<br>Biosynthesis |               |                                                                            | 2.7.6.5             |
| rxn00915    | GUAPRT      | guanine<br>phosphoribosyltransfera<br>se                          | prpp[c] + gua[c]<br>=> ppi[c] +<br>gmp[c]                          | 0   | BT_4386                 | 0     | 1000 | 2  | Nucleotide<br>Salvage<br>Pathway                    |               |                                                                            | 2.4.2.8,2.4.<br>2.7 |
| rxn01080    | GUI1        | glucuronate isomerase<br>(D-glucuronate)                          | glcur[c] <=><br>fruur[c]                                           | 1   | BT_0823                 | -1000 | 1000 | 2  | Alternate<br>Carbon<br>Metabolism                   |               |                                                                            | 5.3.1.12            |
| rxn01457    | GUI2        | glucuronate isomerase<br>(D-galacturonate)                        | galur[c] <=><br>tagur[c]                                           | 1   | BT_0823                 | -1000 | 1000 | 2  | Alternate<br>Carbon<br>Metabolism                   |               |                                                                            | 5.3.1.12            |
| rxn05319    | H2Ot        | H2O transport via<br>diffusion                                    | h2o[e] <=><br>h2o[c]                                               | 1   | BT_4718                 | -1000 | 1000 | 2  | Transport,<br>Extracellular                         |               | Irreversible reaction<br>in SEED. Gene was<br>added based on NCBI<br>Gene. |                     |
|             | H2St        | h2s transport (diffusion)                                         | h2s[e] <=><br>h2s[c]                                               | 1   |                         | -1000 | 1000 | 2  | Transport,<br>Extracellular                         | PMID:4853401  | Sulfide (alternatively<br>cysteine) is required<br>as sulfur source.       |                     |
|             | H2td        | hydrogen transport                                                | h2[c] <=> h2[e]                                                    | 1   |                         | -1000 | 1000 | 1  | Transport,<br>Extracellular                         | PMID:20444704 | B. thetaiotaomicron<br>produces hydrogen.                                  |                     |
| rxn00102    | HCO3E       | HCO3 equilibration<br>reaction                                    | h2o[c] + co2[c]<br><=> h[c] +<br>hco3[c]                           | 1   | BT_1681                 | -1000 | 1000 | 2  | Unassigned                                          |               |                                                                            | 4.2.1.1             |
|             | HCYSMT      | homocysteine S-<br>methyltransferase                              | hcys-L[c] +<br>amet[c] => h[c]<br>+ ahcys[c] + met-<br>L[c]        | 0   | BT_0180                 | 0     | 1000 | 2  | Methionine<br>Metabolism                            |               |                                                                            |                     |

| SEED Rxn ID | BIGG Rxn ID | Function                         | Formula                                                                    | Rev | GA                                                                                                                                               | LB | UB   | CS | Subsystem                                  | Reference                                   | Notes                                                                                                                                                                                                                                                                                                                                                                                                            | EC Number |
|-------------|-------------|----------------------------------|----------------------------------------------------------------------------|-----|--------------------------------------------------------------------------------------------------------------------------------------------------|----|------|----|--------------------------------------------|---------------------------------------------|------------------------------------------------------------------------------------------------------------------------------------------------------------------------------------------------------------------------------------------------------------------------------------------------------------------------------------------------------------------------------------------------------------------|-----------|
|             | HEMEti      | Heme transport via ABC system    | h2o[c] + atp[c] + pHEME[e] => h[c] + pi[c] + adp[c] + pHEME[c]             | 0   | ((BT_0491 and BT_0492 and BT_0493 and BT_0494 and BT_0495 and BT_0496 and BT_0497 and BT_0498 and BT_0499) or (BT_1950 and BT_1951 and BT_1952)) | 0  | 1000 | 4  | Transport, Extracellular                   | PMID:4853401, PMID:17074906, PMID: 19748469 | B. thetaiotaomicron requires heme for growth. Lewis et al. (2006) characterized the putative heme uptake operon in the related species Porphyromonas gingivalis (Bacteroidales order) and located the genes in B. thetaiotaomicron by using BLAST search. AH 05/12: KOs in this heme uptake operon are nonessential in vitro (Goodman et al. 2009), thus another heme transporter (BT_1950 + BT_1951) was added. |           |
|             | HEPARL1_e   | Heparin Lyase I, extracellular   | 2 h2o[e] + hspg[e] => 2 h[e] + gam26s[e] + hspg_degr_1[e] + hspg_degr_2[e] | 0   | BT_4675                                                                                                                                          | 0  | 1000 | 4  | Glycosaminoglycan Degradation              | PMID:19801541, PMID:7574611                 | Heparin Lyase I cleaves the glycosidic linkage to the nonreducing end of iduronate. B. thetaiotaomicron specific putative pathway.                                                                                                                                                                                                                                                                               | 4.2.2.7   |
| rxn12008    | HETT        | all-trans-Heptaprenyltransferase | ipdp[c] + hepd[c] => ppi[c] + octdp[c]                                     | 0   | (BT_3261 or BT_2058)                                                                                                                             | 0  | 1000 | 2  | Cofactor and Prosthetic Group Biosynthesis |                                             | Added manually to BIGG database based on SEED database                                                                                                                                                                                                                                                                                                                                                           | 2.5.1.90  |
| rxn00216    | HEX1        | hexokinase (D-glucose:ATP)       | atp[c] + glc-D[c] => h[c] + adp[c] + g6p[c]                                | 0   | (BT_2430 or BT_2493 or BT_4654)                                                                                                                  | 0  | 1000 | 4  | Glycolysis/Gluconeogenesis                 | PMID: 15659667 , PMID:73363                 | Reversible in SEED                                                                                                                                                                                                                                                                                                                                                                                               | 2.7.1.1   |
|             | HEX10       | hexokinase (D-glucosamine:ATP)   | atp[c] + gam[c] => h[c] + adp[c] + gam6p[c]                                | 0   | BT_2430                                                                                                                                          | 0  | 1000 | 3  | Aminosugar Metabolism                      | PMID:7240086                                | B. thetaiotaomicron is able to ferment glucosamine. Proposed pathway, not sure if glucosamine is utilized in this way.                                                                                                                                                                                                                                                                                           | 2.7.1.1   |

| SEED Rxn ID | BIGG Rxn ID | Function                                            | Formula                                                    | Rev | GA                              | LB    | UB   | CS | Subsystem                                  | Reference                                                                                                                 | Notes                                                                                                                                                      | EC Number |
|-------------|-------------|-----------------------------------------------------|------------------------------------------------------------|-----|---------------------------------|-------|------|----|--------------------------------------------|---------------------------------------------------------------------------------------------------------------------------|------------------------------------------------------------------------------------------------------------------------------------------------------------|-----------|
|             | HEX11       | hexokinase (D-galactosamine:ATP)                    | atp[c] + galam[c] => h[c] + adp[c] + galam6p[c]            | 0   |                                 | 0     | 1000 | 2  | Aminosugar Metabolism                      | PMID: 6367911                                                                                                             | Galactosamine is metabolized by B. thetaiotaomicron to some extent and appears to be phosphorylated (though the compound does not support growth in vivo). |           |
|             | HEX4        | hexokinase (D-mannose:ATP)                          | atp[c] + man[c] => h[c] + adp[c] + man6p[c]                | 0   | (BT_2430 or BT_2493 or BT_4654) | 0     | 1000 | 3  | Alternate Carbon Metabolism                | PMID:15659667                                                                                                             | Reversible reaction in SEED. Enzyme was characterized experimentally for B. fragilis.                                                                      | 2.7.1.7   |
| rxn00547    | HEX7        | hexokinase (D-fructose:ATP)                         | atp[c] + fru[c] => h[c] + adp[c] + f6p[c]                  | 0   | (BT_1757 or BT_3305)            | 0     | 1000 | 3  | Alternate Carbon Metabolism                | PMID: 20603004                                                                                                            | Reversible reaction in SEED. BT_1757 indirectly confirmed by gene expression study.                                                                        | 2.7.1.1   |
| rxn01169    | HEXb        | ATPD-glucose 6-phosphotransferase                   | atp[c] + glc-bD[c] => h[c] + adp[c] + g6p-B[c]             | 0   | (BT_2430 or BT_2493 or BT_4654) | 0     | 1000 | 4  | Glycolysis/Gluconeogenesis                 | PMID: 15659667, PMID:73363                                                                                                | Reversible reaction in SEED. Enzyme was characterized experimentally for B. fragilis.                                                                      | 2.7.1.1   |
| rxn03891    | HEXTT       | trans-hexaprenyltranstransferase                    | ipdp[c] + hexdp[c] => ppi[c] + hepdp[c]                    | 0   | (BT_3261 or BT_2058)            | 0     | 1000 | 2  | Cofactor and Prosthetic Group Biosynthesis |                                                                                                                           |                                                                                                                                                            | 2.5.1.30  |
| rxn10343    | HG2abc      | Mercury (Hg+2) ABC transporter                      | h2o[c] + atp[c] + hg2[c] => h[c] + pi[c] + adp[c] + hg2[e] | 0   | BT_1091                         | 0     | 1000 | 2  | Transport, Extracellular                   |                                                                                                                           | Added manually to BIGG database based on SEED database                                                                                                     |           |
| rxn00867    | HISD        | Histidine ammonia-lyase (EC 4.3.1.3)                | his-L[c] => nh4[c] + urcan[c]                              | 0   | BT_2690                         | 0     | 1000 | 2  | Histidine Metabolism                       |                                                                                                                           |                                                                                                                                                            | 4.3.1.3   |
|             | HIS2r       | L-histidine reversible transport via proton symport | h[e] + his-L[e] <=> h[c] + his-L[c]                        | 1   |                                 | -1000 | 1000 | 2  | Transport, Extracellular                   | Dworkin, M. and S. Falkow (2006). The prokaryotes : a handbook on the biology of bacteria. New York ; [London], Springer. | B. thetaiotaomicron is weakly proteolytic, so a transport reaction for all amino acids is assumed to be present.                                           |           |

| SEED Rxn ID | BIGG Rxn ID | Function                                                          | Formula                                                         | Rev | GA                                                                                                                                                                                                                                                                                               | LB | UB   | CS | Subsystem                                  | Reference                      | Notes                                                                                                                                                                                                                                                                      | EC Number |
|-------------|-------------|-------------------------------------------------------------------|-----------------------------------------------------------------|-----|--------------------------------------------------------------------------------------------------------------------------------------------------------------------------------------------------------------------------------------------------------------------------------------------------|----|------|----|--------------------------------------------|--------------------------------|----------------------------------------------------------------------------------------------------------------------------------------------------------------------------------------------------------------------------------------------------------------------------|-----------|
| rxn00863    | HISTD       | histidinol dehydrogenase                                          | h2o[c] + 2 nad[c] + histd[c] => 3 h[c] + 2 nadh[c] + his-L[c]   | 0   | BT_0201                                                                                                                                                                                                                                                                                          | 0  | 1000 | 2  | Histidine Metabolism                       |                                | Originally two subreactions in SEED                                                                                                                                                                                                                                        | 1.1.1.23  |
| rxn02160    | HISTP       | histidinol-phosphatase                                            | h2o[c] + hisp[c] => pi[c] + histd[c]                            | 0   | (BT_0203 or BT_1478 or BT_4257)                                                                                                                                                                                                                                                                  | 0  | 1000 | 2  | Histidine Metabolism                       |                                | BT_0203: Histidine biosynthesis bifunctional protein hisB (reviewed in UniProt, updated 08.03.11)                                                                                                                                                                          | 3.1.3.15  |
| rxn02484    | HMPK1       | hydroxymethylpyrimidine kinase (ATP)                              | atp[c] + 4ahmmp[c] => h[c] + adp[c] + 4ampm[c]                  | 0   | BT_0790                                                                                                                                                                                                                                                                                          | 0  | 1000 | 2  | Cofactor and Prosthetic Group Biosynthesis |                                | Reversible reaction in SEED                                                                                                                                                                                                                                                | 2.7.1.49  |
|             | HOMOGALASEe | Homogalacturonan degradation (citrus HG, 100 residues)            | 100 h2o[e] + homogal[e] => 20 ac[e] + 100 galur[e] + 20 meoh[e] | 0   | ((BT_4146 or BT_4149 or BT_4153 or BT_4155 or BT_4170 or BT_4183 or BT_4115 or BT_4116 or BT_4119 or BT_4123) and BT_4150 and BT_4175 and (BT_4109 or BT_4110) and ((BT_4670 and BT_4671) or (BT_4164 and BT_4165) or (BT_4113 and BT_4114) or (BT_4121 and BT_4122) or (BT_3680 and BT_3681)))) | 0  | 1000 | 4  | Plant Polysaccharide Degradation           | PMID: 22205877, PMID: 12913136 | Bacteroides thetaiotaomicron grows on citrus homogalacturonan. The genes included in the GPR are upregulated during growth. Enzymes/ proteins assumed to be involved: galacturonisidase, rhamnogalactorunan esterase, rhamnogalacturonan lyase, pectinesterase, susC/ SusD |           |
| rxn02503    | HPPK        | 2-amino-4-hydroxy-6-hydroxymethyldihydropteridine diphosphokinase | atp[c] + 2ahhmp[c] => h[c] + amp[c] + 2ahhmd[c]                 | 0   | BT_3216                                                                                                                                                                                                                                                                                          | 0  | 1000 | 2  | Folate Metabolism                          |                                | Reversible reaction in SEED                                                                                                                                                                                                                                                | 2.7.6.3   |

| SEED Rxn ID | BIGG Rxn ID | Function                                              | Formula                                          | Rev | GA      | LB    | UB   | CS | Subsystem                                 | Reference | Notes | EC Number |
|-------------|-------------|-------------------------------------------------------|--------------------------------------------------|-----|---------|-------|------|----|-------------------------------------------|-----------|-------|-----------|
| rxn01301    | HSDxi2      | homoserine dehydrogenase (NADH), irreversible         | h[c] + nadh[c] + aspsa[c] => nad[c] + hom-L[c]   | 0   | BT_2403 | 0     | 1000 | 2  | Glycine, Serine, and Threonine Metabolism |           |       | 1.1.1.3   |
| rxn01302    | HSDyi2      | homoserine dehydrogenase (NADPH), irreversible        | h[c] + nadph[c] + aspsa[c] => nadp[c] + hom-L[c] | 0   | BT_2403 | 0     | 1000 | 2  | Glycine, Serine, and Threonine Metabolism |           |       | 1.1.1.3   |
| rxn01300    | HSK         | homoserine kinase                                     | atp[c] + hom-L[c] => h[c] + adp[c] + phom[c]     | 0   | BT_2402 | 0     | 1000 | 2  | Threonine and Lysine Metabolism           |           |       | 2.7.1.39  |
| rxn01304    | HSST        | homoserine O-succinyltransferase                      | hom-L[c] + succoa[c] => coa[c] + suchms[c]       | 0   | BT_2413 | 0     | 1000 | 2  | Methionine Metabolism                     |           |       | 2.3.1.46  |
| rxn02320    | HSTPTr      | Histidinol-phosphate aminotransferase (EC 2.6.1.9)    | akg[c] + hisp[c] <=> glu-L[c] + imacp[c]         | 1   | BT_0202 | -1000 | 1000 | 2  | Histidine Metabolism                      |           |       | 2.6.1.9   |
| rxn00836    | HXPRT       | hypoxanthine phosphoribosyltransferase (Hypoxanthine) | prpp[c] + hxa[c] => ppi[c] + imp[c]              | 0   | BT_4386 | 0     | 1000 | 2  | Nucleotide Salvage Pathway                |           |       | 2.4.2.8   |

| SEED Rxn ID | BIGG Rxn ID | Function                                 | Formula                                                                                    | Rev | GA                              | LB | UB   | CS | Subsystem          | Reference      | Notes                                                                                                                                                                                                                                                                                                                                                                                                                                                                                                         | EC Number |
|-------------|-------------|------------------------------------------|--------------------------------------------------------------------------------------------|-----|---------------------------------|----|------|----|--------------------|----------------|---------------------------------------------------------------------------------------------------------------------------------------------------------------------------------------------------------------------------------------------------------------------------------------------------------------------------------------------------------------------------------------------------------------------------------------------------------------------------------------------------------------|-----------|
| rxn10118    | HYD1        | hydrogenase<br>(ubiquinone-8: 2 protons) | $2 \text{ h[c]} + \text{q8[c]} + \text{h2[c]} \Rightarrow 2 \text{ h[e]} + \text{q8h2[c]}$ | 0   | (BT_1210 or BT_0124 or BT_1834) | 0  | 1000 | 4  | Central Metabolism | PMID: 12777495 | B. thetaiotaomicron generates hydrogen as one of its fermentation end products. Hydrogen also serves as an alternate electron donor for fumarate reduction via fumarate reductase (PMID:12777495). Gene annotation was proposed by the SEED Viewer, however, the reaction was not included in the draft model generated by Model SEED. NCBI Gene proposes NADH: ubiquinone oxidoreductase for BT_0124. According to KEGG, this reaction and ferredoxin hydrogenase (HYD4) are carried out by the same enzyme. | 1.18.99.1 |

| SEED Rxn ID | BIGG Rxn ID | Function                           | Formula                       | Rev | GA                              | LB    | UB   | CS | Subsystem          | Reference                                                                            | Notes                                                                                                                                                                                                                                                                                                                                                                                                                                                                                                                                                                                                                                                                                                                                                                                                                                                                                                                | EC Number |
|-------------|-------------|------------------------------------|-------------------------------|-----|---------------------------------|-------|------|----|--------------------|--------------------------------------------------------------------------------------|----------------------------------------------------------------------------------------------------------------------------------------------------------------------------------------------------------------------------------------------------------------------------------------------------------------------------------------------------------------------------------------------------------------------------------------------------------------------------------------------------------------------------------------------------------------------------------------------------------------------------------------------------------------------------------------------------------------------------------------------------------------------------------------------------------------------------------------------------------------------------------------------------------------------|-----------|
|             | HYD4        | hydrogen:ferredoxin oxidoreductase | fdxrd[c] <=> fdxox[c] + h2[c] | 1   | (BT_1210 or BT_0124 or BT_1834) | -1000 | 1000 | 4  | Central Metabolism | PMID:893348, PMID:760499, PMID:12740060, PMID:11260473, PMID:12777495, PMID:20444704 | In the gut, this reaction regenerates NAD+ via NADH:ferredoxin oxidoreductase (FDNADOX). B. thetaiotaomicron generates hydrogen as one of its fermentation end products; accumulation of hydrogen inhibits reoxidation of NADH. It is therefore assumed that it regenerates NAD+ via this pathway, which leads to increased hydrogen partial pressure. Removal of hydrogen allows B. thetaiotaomicron to regenerate NAD+. The reaction can also be linked to pyruvate:ferredoxin oxidoreductase (PMID:11260473). Hydrogen also serves as an alternate electron donor for fumarate reduction via fumarate reductase (PMID:12777495). Gene annotation was proposed by the SEED Viewer, however, the reaction was not included in the draft model generated by Model SEED. NCBI Gene proposes NADH: ubiquinone oxidoreductase for BT_0124. According to KEGG, this reaction and ubiquinone-dependent hydrogenase (HYD1) | 1.12.7.2  |

| SEED Rxn ID | BIGG Rxn ID  | Function                                                     | Formula                                              | Rev | GA      | LB    | UB   | CS | Subsystem                                  | Reference                                   | Notes                                                                                                                                                                                                                            | EC Number |
|-------------|--------------|--------------------------------------------------------------|------------------------------------------------------|-----|---------|-------|------|----|--------------------------------------------|---------------------------------------------|----------------------------------------------------------------------------------------------------------------------------------------------------------------------------------------------------------------------------------|-----------|
|             | HYPSUCORNS   | putative succinylornithine synthesis (hypothetical reaction) | orn[c] + succ[c] => h2o[c] + sucorn[c]               | 0   |         | 0     | 1000 | 1  | exchange/dem and reaction                  |                                             | Hypothetical reaction, it is not known how this metabolite is synthesized.                                                                                                                                                       |           |
| rxn05408    | IBCOATA      | 2-methylpropionyl-CoA[acyl-carrier-protein] transferase      | ACP[c] + ibcoa[c] <=> coa[c] + 2mpropACP[c]          | 1   | BT_0789 | -1000 | 1000 | 3  | Glycerophospholipid Metabolism             | PMID: 6102980, PMID: 7440508, PMID: 7204330 | Added manually to BIGG database based on reaction mechanism proposed by Model SEED. This reaction is involved in fatty acid biosynthesis. B. thetaiotaomicron is well known to synthesize iso- and anteiso-branched fatty acids. | 2.3.1.180 |
| rxn00199    | ICDHyr       | isocitrate dehydrogenase (NADP)                              | nadp[c] + icit[c] <=> akgl[c] + nadph[c] + co2[c]    | 1   | BT_2071 | -1000 | 1000 | 3  | TCA Cycle                                  | PMID:11880608                               | Enzyme was characterized experimentally for B. fragilis.                                                                                                                                                                         | 1.1.1.42  |
| rxn01258    | ICHORS       | isochorismate synthase                                       | chor[c] <=> ichor[c]                                 | 1   | BT_4700 | -1000 | 1000 | 2  | Cofactor and Prosthetic Group Biosynthesis |                                             |                                                                                                                                                                                                                                  | 5.4.99.6  |
|             | IDOURASE     | L-iduronidase                                                | h2o[e] + acgalidour[e] => acgal[e] + idour[e]        | 0   |         | 0     | 1000 | 2  | Glycosaminoglycan Degradation              | PMID:18227125                               | Assumed to be present since B. thetaiotaomicron can degrade dermatan, which contains iduronate .                                                                                                                                 | 3.2.1.76  |
|             | IDOURASE_HS1 | Iduronidase, heparin degradation                             | h2o[e] + hspg_degr_1[e] => hspg_degr_3[e] + idour[e] | 0   |         | 0     | 1000 | 2  | Glycosaminoglycan Degradation              | PMID:19801541, PMID:7574611                 | B. thetaiotaomicron specific putative heparin sulfate degradation pathway. It is not known which enzyme performs this step.                                                                                                      | 3.2.1.76  |
|             | IDOURASE_HS2 | Iduronidase, heparin degradation                             | h2o[e] + hspg_degr_7[e] => hspg_degr_8[e] + idour[e] | 0   |         | 0     | 1000 | 2  | Glycosaminoglycan Degradation              | PMID:19801541, PMID:7574611                 | B. thetaiotaomicron specific putative heparin sulfate degradation pathway. It is not known which enzyme performs this step.                                                                                                      | 3.2.1.76  |

| SEED Rxn ID | BIGG Rxn ID  | Function                                                      | Formula                                                     | Rev | GA                    | LB    | UB   | CS | Subsystem                                          | Reference                                   | Notes                                                                                                                                                                                                                            | EC Number |
|-------------|--------------|---------------------------------------------------------------|-------------------------------------------------------------|-----|-----------------------|-------|------|----|----------------------------------------------------|---------------------------------------------|----------------------------------------------------------------------------------------------------------------------------------------------------------------------------------------------------------------------------------|-----------|
|             | IDOURASE_HS3 | Iduronidase, heparin degradation                              | h2o[e] + hspg_degr_14[e] => hspg_degr_15[e] + idour[e]      | 0   |                       | 0     | 1000 | 2  | Glycosaminoglycan Degradation                      | PMID:19801541, PMID:7574611                 | B. thetaiotaomicron specific putative heparin sulfate degradation pathway. It is not known which enzyme performs this step.                                                                                                      | 3.2.1.76  |
| rxn03135    | IG3PS        | Imidazole-glycerol-3-phosphate synthase                       | gln-L[c] + prlp[c] => h[c] + glu-L[c] + aicar[c] + eig3p[c] | 0   | (BT_1378 and BT_1380) | 0     | 1000 | 2  | Histidine Metabolism                               |                                             |                                                                                                                                                                                                                                  | 2.4.2.-   |
| rxn02473    | IGPDH        | imidazoleglycerol-phosphate dehydratase                       | eig3p[c] => h2o[c] + imacp[c]                               | 0   | BT_0203               | 0     | 1000 | 2  | Histidine Metabolism                               |                                             |                                                                                                                                                                                                                                  | 4.2.1.19  |
| rxn02507    | IGPS         | indole-3-glycerol-phosphate synthase                          | h[c] + 2cpr5p[c] => h2o[c] + co2[c] + 3ig3p[c]              | 0   | BT_0529               | 0     | 1000 | 2  | Tyrosine, Tryptophan, and Phenylalanine Metabolism |                                             |                                                                                                                                                                                                                                  | 4.1.1.48  |
| rxn05456    | IHDCOATA     | 14-methyl-pentadecanoyl-ACP[acyl-carrier-protein] transferase | coa[c] + 14mpentdecACP[c] <=> ACP[c] + ihdcoa[c]            | 1   | BT_0789               | -1000 | 1000 | 2  | Glycerophospholipid Metabolism                     | PMID: 6102980, PMID: 7440508, PMID: 7204330 | Added manually to BIGG database based on reaction mechanism proposed by Model SEED. This reaction is involved in fatty acid biosynthesis. B. thetaiotaomicron is well known to synthesize iso- and anteiso-branched fatty acids. | 2.3.1.180 |
| rxn05454    | IHPDCOATA    | 15-methyl-hexadecanoyl-ACP[acyl-carrier-protein] transferase  | coa[c] + 15mpalmACP[c] <=> ACP[c] + ihpdcoa[c]              | 1   | BT_0789               | -1000 | 1000 | 2  | Glycerophospholipid Metabolism                     | PMID: 6102980, PMID: 7440508, PMID: 7204330 | Added manually to BIGG database based on reaction mechanism proposed by Model SEED. This reaction is involved in fatty acid biosynthesis. B. thetaiotaomicron is well known to synthesize iso- and anteiso-branched fatty acids. | 2.3.1.180 |

| SEED Rxn ID | BIGG Rxn ID | Function                                             | Formula                                                        | Rev | GA                   | LB    | UB   | CS | Subsystem                                  | Reference                                     | Notes                                                                                                                                                                                                                     | EC Number |
|-------------|-------------|------------------------------------------------------|----------------------------------------------------------------|-----|----------------------|-------|------|----|--------------------------------------------|-----------------------------------------------|---------------------------------------------------------------------------------------------------------------------------------------------------------------------------------------------------------------------------|-----------|
| rxn05244    | ILEt2r      | L-isoleucine reversible transport via proton symport | $h[e] + ile-L[e] \rightleftharpoons h[c] + ile-L[c]$           | 1   |                      | -1000 | 1000 | 2  | Transport, Extracellular                   | PMID:7462155                                  | B. thetaiotaomicron incorporates leucine, valine and isoleucine into its phospholipids, which suggests the presence of a transporter for these amino acids. However, it is not known which gene encodes this transporter. |           |
| rxn01575    | ILETA       | isoleucine transaminase                              | $akg[c] + ile-L[c] \rightleftharpoons glu-L[c] + 3mop[c]$      | 1   | BT_3892              | -1000 | 1000 | 2  | Valine, Leucine, and Isoleucine Metabolism |                                               |                                                                                                                                                                                                                           | 2.6.1.42  |
| rxn00832    | IMPC        | IMP cyclohydrolase                                   | $h2o[c] + imp[c] \rightleftharpoons fprica[c]$                 | 1   | BT_3812              | -1000 | 1000 | 2  | Purine and Pyrimidine Biosynthesis         |                                               |                                                                                                                                                                                                                           | 3.5.4.10  |
| rxn00834    | IMPD        | IMP dehydrogenase                                    | $h2o[c] + nad[c] + imp[c] \Rightarrow h[c] + nadh[c] + xmp[c]$ | 0   | BT_3845              | 0     | 1000 | 2  | Purine and Pyrimidine Biosynthesis         |                                               | Reversible reaction in SEED                                                                                                                                                                                               | 1.1.1.205 |
| rxn01299    | INSH        | Inosine hydrolase                                    | $h2o[c] + ins[c] \Rightarrow rib-D[c] + hxa[c]$                | 0   | BT_2808              | 0     | 1000 | 2  | Nucleotide Salvage Pathway                 |                                               | Reversible reaction in SEED                                                                                                                                                                                               | 3.2.2.8   |
| rxn05316    | INSt2       | inosine transport in via proton symport, reversible  | $h[e] + ins[e] \rightleftharpoons h[c] + ins[c]$               | 1   | BT_4330              | -1000 | 1000 | 2  | Transport, Extracellular                   |                                               | Reversible reaction in SEED                                                                                                                                                                                               |           |
|             | INULINASEe  | Inulin degradation, extracellular                    | $25 h2o[e] + inulin[e] \Rightarrow 25 fru[e] + kestopt[e]$     | 0   | (BT_1759 or BT_3082) | 0     | 1000 | 4  | Plant Polysaccharide Degradation           | PMID: 19251883, PMID: 19321416, PMID:20603004 | B. thetaiotaomicron grows on inulin (though slowly and less efficient than on levan).                                                                                                                                     |           |

| SEED Rxn ID | BIGG Rxn ID | Function                                                        | Formula                                                                                                                                     | Rev | GA                    | LB    | UB   | CS | Subsystem                                          | Reference                                   | Notes                                                                                                                                                                                                                                                                                                                                                                                      | EC Number |
|-------------|-------------|-----------------------------------------------------------------|---------------------------------------------------------------------------------------------------------------------------------------------|-----|-----------------------|-------|------|----|----------------------------------------------------|---------------------------------------------|--------------------------------------------------------------------------------------------------------------------------------------------------------------------------------------------------------------------------------------------------------------------------------------------------------------------------------------------------------------------------------------------|-----------|
|             | IOR2        | indolepyruvate ferredoxin oxidoreductase (phenylpyruvate)       | $\text{coa}[c] + 2 \text{fdox}[c] + \text{phpyr}[c] \rightleftharpoons \text{h}[c] + \text{co2}[c] + 2 \text{fdred}[c] + \text{phaccoa}[c]$ | 1   | (BT_0429 and BT_0430) | -1000 | 1000 | 3  | Tyrosine, Tryptophan, and Phenylalanine Metabolism | PMID:18396344, PMID:16887608                | Added based on annotation from NCBI Gene. B. thetaiotaomicron produces phenylacetate as a minor fermentation product (PMID:18396344). The indolepyruvate-dependent reaction of this enzyme may not take place since indoleacetate (a product of this pathway) was not found in B. thetaiotaomicron. Phenylacetate is also formed in the gut from aromatic acid metabolism (PMID:16887608). | 1.2.7.8   |
| rxn05453    | IPDCOATA    | 13-methyl-tetradecanoyl-ACP[acyl-carrier-protein] transferase   | $\text{coa}[c] + 13\text{mmysACP}[c] \rightleftharpoons \text{ACP}[c] + \text{ipdcoa}[c]$                                                   | 1   | BT_0789               | -1000 | 1000 | 2  | Glycerophospholipid Metabolism                     | PMID: 6102980, PMID: 7440508, PMID: 7204330 | Added manually to BIGG database based on reaction mechanism proposed by Model SEED. This reaction is involved in fatty acid biosynthesis. B. thetaiotaomicron is well known to synthesize iso- and anteiso-branched fatty acids.                                                                                                                                                           | 2.3.1.180 |
| rxn00830    | IPDDI       | isopentenyl-diphosphate D-isomerase                             | $\text{ipdp}[c] \rightleftharpoons \text{dmpp}[c]$                                                                                          | 1   | BT_3972               | -1000 | 1000 | 2  | Cofactor and Prosthetic Group Biosynthesis         |                                             |                                                                                                                                                                                                                                                                                                                                                                                            | 5.3.3.2   |
| rxn08756    | IPDPS       | 1-hydroxy-2-methyl-2-(E)-butenyl 4-diphosphate reductase (ipdp) | $\text{h}[c] + \text{nadh}[c] + \text{h2mb4p}[c] \Rightarrow \text{h2o}[c] + \text{nad}[c] + \text{ipdp}[c]$                                | 0   | BT_2061               | 0     | 1000 | 2  | Cofactor and Prosthetic Group Biosynthesis         |                                             | Reviewed ispH 4-hydroxy-3-methylbut-2-enyl diphosphate reductase (NCBI Gene, updated 08.01.11)                                                                                                                                                                                                                                                                                             | 1.17.1.2  |

| SEED Rxn ID | BIGG Rxn ID | Function                                      | Formula                                                         | Rev | GA                                               | LB    | UB   | CS | Subsystem                                  | Reference                                  | Notes                                                                                                                                     | EC Number |
|-------------|-------------|-----------------------------------------------|-----------------------------------------------------------------|-----|--------------------------------------------------|-------|------|----|--------------------------------------------|--------------------------------------------|-------------------------------------------------------------------------------------------------------------------------------------------|-----------|
| rxn04113    | IPDPS2      | isopentenyl-diphosphateNAD(P)+ oxidoreductase | h[c] + nadph[c] + h2mb4p[c] => h2o[c] + nadp[c] + ipdp[c]       | 0   | BT_2061                                          | 0     | 1000 | 2  | Cofactor and Prosthetic Group Biosynthesis |                                            | Reviewed ispH 4-hydroxy-3-methylbut-2-enyl diphosphate reductase (NCBI Gene, updated 08.01.11)                                            | 1.17.1.2  |
|             | IPMD2       | (2R,3S)-3-methylmalate:NAD+ oxidoreductase    | e3mmal[c] + nad[c] => co2[c] + nadh[c] + 2obut[c]               | 0   | BT_1857                                          | 0     | 1000 | 2  | Valine, Leucine, and Isoleucine Metabolism |                                            | Added based on annotation from KEGG Pathway                                                                                               | 1.1.1.85  |
| rxn03062    | IPMDr       | 3-isopropylmalate dehydrogenase (EC 1.1.1.85) | nad[c] + 3c2hmp[c] <=> h[c] + nadh[c] + 3c4mop[c]               | 1   | BT_1857                                          | -1000 | 1000 | 3  | Valine, Leucine, and Isoleucine Metabolism | PMID:8569539                               | Gene was cloned and characterized for Bacteroides fragilis.                                                                               | 1.1.1.85  |
| rxn02789    | IPPMIa      | 3-isopropylmalate dehydratase                 | 3c2hmp[c] <=> h2o[c] + 2ippm[c]                                 | 1   | (BT_1859 and BT_1860)                            | -1000 | 1000 | 2  | Valine, Leucine, and Isoleucine Metabolism |                                            |                                                                                                                                           | 4.2.1.33  |
| rxn02811    | IPPMIb      | 2-isopropylmalate hydratase                   | h2o[c] + 2ippm[c] <=> 3c3hmp[c]                                 | 1   | (BT_1859 and BT_1860)                            | -1000 | 1000 | 2  | Valine, Leucine, and Isoleucine Metabolism |                                            |                                                                                                                                           | 4.2.1.33  |
| rxn00902    | IPPS        | 2-isopropylmalate synthase                    | h2o[c] + accoa[c] + 3mob[c] => h[c] + coa[c] + 3c3hmp[c]        | 0   | BT_1861                                          | 0     | 1000 | 3  | Valine, Leucine, and Isoleucine Metabolism | PMID:6440485                               | Demonstrated by enzyme assay in Bacteroides fragilis.                                                                                     | 4.1.3.12  |
|             | IS2TASE     | Iduronate 2-sulfatase                         | h2o[e] + acgalidour2s[e] => h[e] + so4[e] + acgalidour[e]       | 0   | ((BT_0238 and BT_0756) or (BT_0238 and BT_2914)) | 0     | 1000 | 4  | Glycosaminoglycan Degradation              | PMID:21507958                              | BT_0238 encodes anSME (anaerobic Sulfatase-Maturing Enzyme).                                                                              | 3.1.6.13  |
|             | IS2TASE_HS1 | Iduronate 2-sulfatase, heparin degradation    | 2 h2o[e] + hspg_degr_2[e] => 4 h[e] + 2 so4[e] + hspg_degr_7[e] | 0   | ((BT_0238 and BT_0756) or (BT_0238 and BT_2914)) | 0     | 1000 | 4  | Glycosaminoglycan Degradation              | PMID:21507958, PMID:19801541, PMID:7574611 | B. thetaiotaomicron specific putative heparin sulfate degradation pathway. Requires sulfatase-maturing enzyme (BT_0238) to be functional. | 3.1.6.13  |

| SEED Rxn ID | BIGG Rxn ID | Function                                                    | Formula                                              | Rev | GA      | LB    | UB   | CS | Subsystem                      | Reference                                                                                               | Notes                                                                                                                                                                                                                            | EC Number |
|-------------|-------------|-------------------------------------------------------------|------------------------------------------------------|-----|---------|-------|------|----|--------------------------------|---------------------------------------------------------------------------------------------------------|----------------------------------------------------------------------------------------------------------------------------------------------------------------------------------------------------------------------------------|-----------|
|             | ISOBUt2r    | Isobutyrate transport via proton symport                    | h[e] + isobut[e]<br><=> h[c] + isobut[c]             | 1   |         | -1000 | 1000 | 2  | Transport, Extracellular       | Krieg, N. R. (2010). Bergey's manual of systematic bacteriology, 2nd ed., volume 4. New York, Springer. | Isobutyrate and isovalerate are known secretion products of B. thetaiotaomicron. It is not known if transport of these metabolites consumes energy, and which transporter carries out this function.                             |           |
|             | ISOCAPRt2r  | Isocaproate transport via proton symport                    | h[e] + isocapr[e]<br><=> h[c] + isocapr[c]           | 1   |         | -1000 | 1000 | 1  | Transport, Extracellular       | PMID:1541601, PMID:16887608                                                                             | Isocaproate is a minor product in the large intestine from leucine reduction. It is not known if this metabolite is produced in B. thetaiotaomicron. Needed for reaction LEUO to be element and charge balanced.                 |           |
|             | ISOVALt2r   | Isovalerate transport via proton symport                    | h[e] + isoval[e]<br><=> h[c] + isoval[c]             | 1   |         | -1000 | 1000 | 2  | Transport, Extracellular       | Krieg, N. R. (2010). Bergey's manual of systematic bacteriology, 2nd ed., volume 4. New York, Springer. | Isobutyrate and isovalerate are known secretion products of B. thetaiotaomicron. It is not known if transport of these metabolites consumes energy, and which transporter carries out this function.                             |           |
| rxn05455    | ITDCOATA    | 12-methyl-tridecanoyl-ACP[acyl-carrier-protein] transferase | coa[c] + 12mtridecACP[c]<br>] <=> ACP[c] + itdcoa[c] | 1   | BT_0789 | -1000 | 1000 | 2  | Glycerophospholipid Metabolism | PMID: 6102980, PMID: 7440508, PMID: 7204330                                                             | Added manually to BIGG database based on reaction mechanism proposed by Model SEED. This reaction is involved in fatty acid biosynthesis. B. thetaiotaomicron is well known to synthesize iso- and anteiso-branched fatty acids. | 2.3.1.180 |

| SEED Rxn ID | BIGG Rxn ID | Function                                                      | Formula                                                                                                 | Rev | GA                                               | LB    | UB   | CS | Subsystem                                  | Reference                                                | Notes                                                                                                                                                                                                                            | EC Number |
|-------------|-------------|---------------------------------------------------------------|---------------------------------------------------------------------------------------------------------|-----|--------------------------------------------------|-------|------|----|--------------------------------------------|----------------------------------------------------------|----------------------------------------------------------------------------------------------------------------------------------------------------------------------------------------------------------------------------------|-----------|
| rxn05383    | IVCOATA     | 3-methylbutanoyl-CoA[acyl-carrier-protein] transferase        | ACP[c] + ivcoa[c] <=> coa[c] + 3mbutACP[c]                                                              | 1   | BT_0789                                          | -1000 | 1000 | 3  | Glycerophospholipid Metabolism             | PMID: 6102980, PMID: 7440508, PMID: 7204330              | Added manually to BIGG database based on reaction mechanism proposed by Model SEED. This reaction is involved in fatty acid biosynthesis. B. thetaiotaomicron is well known to synthesize iso- and anteiso-branched fatty acids. | 2.3.1.180 |
| rxn01642    | IZPN        | imidazolonepropionase                                         | h2o[c] + 4izp[c] => h[c] + forglu[c]                                                                    | 0   | BT_2692                                          | 0     | 1000 | 2  | Histidine Metabolism                       |                                                          |                                                                                                                                                                                                                                  | 3.5.2.7   |
| rxn10168    | Kabc        | Potassium ABC transporter                                     | h2o[c] + atp[c] + k[e] => h[c] + pi[c] + adp[c] + k[c]                                                  | 0   | (BT_2423 and BT_2424 and BT_2425)                | 0     | 1000 | 2  | Transport, Extracellular                   |                                                          |                                                                                                                                                                                                                                  |           |
| rxn02187    | KARA1       | ketol-acid reductoisomerase (2,3-dihydroxy-3-methylbutanoate) | nadp[c] + 23dhmb[c] <=> h[c] + nadph[c] + alac-S[c]                                                     | 1   | BT_2074                                          | -1000 | 1000 | 2  | Valine, Leucine, and Isoleucine Metabolism |                                                          | Originally two subreactions in SEED                                                                                                                                                                                              | 1.1.1.86  |
| rxn02186    | KARA2       | ketol-acid reductoisomerase (2-Acetolactate)                  | h[c] + nadph[c] + 2ahbut[c] <=> nadp[c] + 23dhmp[c]                                                     | 1   | BT_2074                                          | -1000 | 1000 | 2  | Valine, Leucine, and Isoleucine Metabolism |                                                          | Originally two subreactions in SEED                                                                                                                                                                                              | 1.1.1.86  |
|             | KAS1        | b-ketoacyl synthetase (Iso-C14:0)                             | 14 h[c] + 10 nadph[c] + 5 malcoa[c] + ibcoa[c] => 4 h2o[c] + 6 coa[c] + 10 nadp[c] + 5 co2[c] + fa1[c]  | 0   | ((BT_0122 and BT_3358) or (BT_3358 and BT_3834)) | 0     | 1000 | 3  | Glycerophospholipid Metabolism             | PMID:6102980, PMID:7440508, PMID: 7204330, PMID:19460428 | B. thetaiotaomicron is well known to produce iso- and anteiso-branched fatty acids besides straight-chain fatty acids.                                                                                                           | 2.3.1.41  |
|             | KAS11       | b-ketoacyl synthetase (Iso-C17:0)                             | 17 h[c] + 12 nadph[c] + 6 malcoa[c] + ivcoa[c] => 5 h2o[c] + 7 coa[c] + 12 nadp[c] + 6 co2[c] + fa11[c] | 0   | ((BT_0122 and BT_3358) or (BT_3358 and BT_3834)) | 0     | 1000 | 3  | Glycerophospholipid Metabolism             | PMID:6102980, PMID:7440508, PMID: 7204330, PMID:19460428 | B. thetaiotaomicron is well known to produce iso- and anteiso-branched fatty acids besides straight-chain fatty acids.                                                                                                           | 2.3.1.41  |

| SEED Rxn ID | BIGG Rxn ID | Function                              | Formula                                                                                                  | Rev | GA                                               | LB | UB   | CS | Subsystem                      | Reference                                                | Notes                                                                                                                  | EC Number |
|-------------|-------------|---------------------------------------|----------------------------------------------------------------------------------------------------------|-----|--------------------------------------------------|----|------|----|--------------------------------|----------------------------------------------------------|------------------------------------------------------------------------------------------------------------------------|-----------|
|             | KAS12       | b-ketoacyl synthetase (Anteiso-C17:0) | 17 h[c] + 2mbcoa[c] + 12 nadph[c] + 6 malcoa[c] => 5 h2o[c] + 7 coa[c] + 12 nadp[c] + 6 co2[c] + fa12[c] | 0   | ((BT_0122 and BT_3358) or (BT_3358 and BT_3834)) | 0  | 1000 | 3  | Glycerophospholipid Metabolism | PMID:6102980, PMID:7440508, PMID: 7204330, PMID:19460428 | B. thetaiotaomicron is well known to produce iso- and anteiso-branched fatty acids besides straight-chain fatty acids. | 2.3.1.41  |
|             | KAS13       | b-ketoacyl synthetase (octadecanoate) | 23 h[c] + 16 nadph[c] + accoa[c] + 8 malcoa[c] => 7 h2o[c] + 9 coa[c] + 16 nadp[c] + 8 co2[c] + ocdca[c] | 0   | ((BT_0122 and BT_3358) or (BT_3358 and BT_3834)) | 0  | 1000 | 3  | Glycerophospholipid Metabolism | PMID:6102980, PMID:7440508, PMID: 7204330, PMID:19460428 | B. thetaiotaomicron is well known to produce iso- and anteiso-branched fatty acids besides straight-chain fatty acids. | 2.3.1.41  |
| rxn05347    | KAS14       | beta-ketoacyl-ACP synthase            | h[c] + malACP[c] + acACP[c] => ACP[c] + actACP[c] + co2[c]                                               | 0   | ((BT_0122 and BT_3358) or (BT_3358 and BT_3834)) | 0  | 1000 | 3  | Glycerophospholipid Metabolism | PMID:6102980, PMID:7440508, PMID: 7204330, PMID:19460428 | B. thetaiotaomicron is well known to produce iso- and anteiso-branched fatty acids besides straight-chain fatty acids. | 2.3.1.41  |
|             | KAS2        | b-ketoacyl synthetase (n-C14:0)       | 17 h[c] + 12 nadph[c] + accoa[c] + 6 malcoa[c] => 5 h2o[c] + 7 coa[c] + 12 nadp[c] + 6 co2[c] + ttdca[c] | 0   | ((BT_0122 and BT_3358) or (BT_3358 and BT_3834)) | 0  | 1000 | 3  | Glycerophospholipid Metabolism | PMID:6102980, PMID:7440508, PMID: 7204330, PMID:19460428 | B. thetaiotaomicron is well known to produce iso- and anteiso-branched fatty acids besides straight-chain fatty acids. | 2.3.1.41  |
|             | KAS3        | b-ketoacyl synthetase (Iso-C15:0)     | 14 h[c] + 10 nadph[c] + 5 malcoa[c] + ivcoa[c] => 4 h2o[c] + 6 coa[c] + 10 nadp[c] + 5 co2[c] + fa3[c]   | 0   | ((BT_0122 and BT_3358) or (BT_3358 and BT_3834)) | 0  | 1000 | 3  | Glycerophospholipid Metabolism | PMID:6102980, PMID:7440508, PMID: 7204330, PMID:19460428 | B. thetaiotaomicron is well known to produce iso- and anteiso-branched fatty acids besides straight-chain fatty acids. | 2.3.1.41  |
|             | KAS4        | b-ketoacyl synthetase (Anteiso-C15:0) | 14 h[c] + 2mbcoa[c] + 10 nadph[c] + 5 malcoa[c] => 4 h2o[c] + 6 coa[c] + 10 nadp[c] + 5 co2[c] + fa4[c]  | 0   | ((BT_0122 and BT_3358) or (BT_3358 and BT_3834)) | 0  | 1000 | 3  | Glycerophospholipid Metabolism | PMID:6102980, PMID:7440508, PMID: 7204330, PMID:19460428 | B. thetaiotaomicron is well known to produce iso- and anteiso-branched fatty acids besides straight-chain fatty acids. | 2.3.1.41  |

| SEED Rxn ID | BIGG Rxn ID | Function                                                   | Formula                                                                                                 | Rev | GA                                               | LB | UB   | CS | Subsystem                                | Reference                                                | Notes                                                                                                                                                    | EC Number |
|-------------|-------------|------------------------------------------------------------|---------------------------------------------------------------------------------------------------------|-----|--------------------------------------------------|----|------|----|------------------------------------------|----------------------------------------------------------|----------------------------------------------------------------------------------------------------------------------------------------------------------|-----------|
|             | KAS6        | b-ketoacyl synthetase (Iso-C16:0)                          | 17 h[c] + 12 nadph[c] + 6 malcoa[c] + ibcoa[c] => 5 h2o[c] + 7 coa[c] + 12 nadp[c] + 6 co2[c] + fa6[c]  | 0   | ((BT_0122 and BT_3358) or (BT_3358 and BT_3834)) | 0  | 1000 | 3  | Glycerophospholipid Metabolism           | PMID:6102980, PMID:7440508, PMID: 7204330, PMID:19460428 | B. thetaiotaomicron is well known to produce iso- and anteiso-branched fatty acids besides straight-chain fatty acids.                                   | 2.3.1.41  |
|             | KAS8        | b-ketoacyl synthetase (palmitate, n-C16:0)                 | 20 h[c] + 14 nadph[c] + accoa[c] + 7 malcoa[c] => 6 h2o[c] + 8 coa[c] + 14 nadp[c] + 7 co2[c] + hdca[c] | 0   | ((BT_0122 and BT_3358) or (BT_3358 and BT_3834)) | 0  | 1000 | 3  | Glycerophospholipid Metabolism           | PMID:6102980, PMID:7440508, PMID: 7204330, PMID:19460428 | B. thetaiotaomicron is well known to produce iso- and anteiso-branched fatty acids besides straight-chain fatty acids.                                   | 2.3.1.41  |
|             | KDNH        | 2-keto-3deoxy-D-glycero-D-galactonic acid phosphohydrolase | h2o[c] + kdnpc[c] => pi[c] + kdn[c]                                                                     | 0   | BT_1713                                          | 0  | 1000 | 4  | Capsular Polysaccharide Biosynthesis     | PMID:18804026                                            | B. thetaiotaomicron forms and cytidylates 2-keto-3-deoxy-D-glycero-D-galactononic acid (KDN), most likely for inclusion in its capsular polysaccharides. |           |
|             | KDOCT2      | 3-deoxy-manno-octulosonate cytidyltransferase              | ctp[c] + kdo[c] => ppi[c] + ckdo[c]                                                                     | 0   | BT_0745                                          | 0  | 1000 | 2  | Lipopolysaccharide Biosynthesis          |                                                          |                                                                                                                                                          | 2.7.7.38  |
| rxn02404    | KDOPP       | 3-deoxy-manno-octulosonate-8-phosphatase                   | h2o[c] + kdo8p[c] => pi[c] + kdo[c]                                                                     | 0   | (BT_1677 or BT_1713)                             | 0  | 1000 | 4  | Lipopolysaccharide Biosynthesis          | PMID: 18986982                                           | BT_1713 gene product was purified and characterized.                                                                                                     | 3.1.3.45  |
| rxn02331    | KDOPS       | 3-deoxy -D-manno-octulosonic -acid 8-phosphate synthase    | h2o[c] + ara5p[c] + pep[c] => pi[c] + kdo8p[c]                                                          | 0   | BT_4321                                          | 0  | 1000 | 2  | Lipopolysaccharide Biosynthesis          |                                                          |                                                                                                                                                          | 4.1.2.16  |
|             | KDUI        | 5-keto-4-deoxyuronate isomerase                            | dt5hsu[c] => dkdglcn[c]                                                                                 | 0   | (BT_3231 or BT_4106)                             | 0  | 1000 | 2  | Pentose and Glucuronate Interconversions |                                                          | Added based on annotation from KEGG Pathway                                                                                                              | 5.3.1.17  |
|             | KESTOASEe   | Beta-2-1 fructan degradation, extracellular                | 2 h2o[e] + kesto[e] => glc-D[e] + 2 fru[e]                                                              | 0   | (BT_1759 or BT_3082)                             | 0  | 1000 | 4  | Plant Polysaccharide Degradation         | PMID:20603004                                            | B. thetaiotaomicron grows well on short chain beta-2-1 fructans.                                                                                         | 3.2.1.65  |
|             | KESTOPTASEe | Beta-2-1 fructan degradation, extracellular                | 4 h2o[e] + kestopt[e] => glc-D[e] + 4 fru[e]                                                            | 0   | (BT_1759 or BT_3082)                             | 0  | 1000 | 4  | Plant Polysaccharide Degradation         | PMID:20603004                                            | B. thetaiotaomicron grows well on short chain beta-2-1 fructans.                                                                                         | 3.2.1.65  |

| SEED Rxn ID | BIGG Rxn ID         | Function                                                                           | Formula                                           | Rev | GA                                                                          | LB    | UB   | CS | Subsystem                        | Reference      | Notes                                                                                                                                                                                                | EC Number |
|-------------|---------------------|------------------------------------------------------------------------------------|---------------------------------------------------|-----|-----------------------------------------------------------------------------|-------|------|----|----------------------------------|----------------|------------------------------------------------------------------------------------------------------------------------------------------------------------------------------------------------------|-----------|
|             | KESTOTTRASEe        | Beta-2-1 fructan degradation, extracellular                                        | 3 h2o[e] + kestottr[e] => glc-D[e] + 3 fru[e]     | 0   | (BT_1759 or BT_3082)                                                        | 0     | 1000 | 4  | Plant Polysaccharide Degradation | PMID:20603004  | B. thetaiotaomicron grows well on short chain beta-2-1 fructans.                                                                                                                                     | 3.2.1.65  |
| rxn05596    | Kt3r                | potassium proton antiporter                                                        | h[e] + k[c] <=> h[c] + k[e]                       | 1   | ((BT_4097 and BT_4098) or (BT_4665 and BT_4666))                            | -1000 | 1000 | 2  | Transport, Extracellular         |                |                                                                                                                                                                                                      |           |
| rxn05602    | L_LACt2r            | L-lactate reversible transport via proton symport                                  | h[e] + lac-L[e] <=> h[c] + lac-L[c]               | 1   | BT_1453                                                                     | -1000 | 1000 | 2  | Transport, Extracellular         |                |                                                                                                                                                                                                      |           |
| rxn03012    | L2A6OD2s            | 2,3,4,5-Tetrahydrodipicolinate conversion to L-2-Amino-6-oxopimelate (spontaneous) | h2o[c] + h[c] + thdp[c] => l2a6o[c]               | 0   |                                                                             | 0     | 1000 | 2  | Folate Metabolism                |                |                                                                                                                                                                                                      |           |
|             | LACDFUCTTR_F UCASEe | alpha-fucosidase, Lactodifucotetraose (extracellular)                              | h2o[e] + lacdfucttr[e] => 2fuc lac[e] + fuc-L[e]  | 0   | ((BT_1625 or BT_4136) and ((BT_4134 and BT_4135) or (BT_1630 and BT_1631))) | 0     | 1000 | 4  | HMO Degradation                  | PMID: 22036470 | B. thetaiotaomicron grows on human milk oligosaccharides (HMOs); numerous glycosidase hydrolases are upregulated during growth on HMOs. Involves alpha-fucosidase and susC/ SusD (binding proteins). | 3.2.1.51  |
|             | LACNDFUCHX_F UCASEe | alpha-fucosidase, Lacto-N-difucohexaose (extracellular)                            | h2o[e] + lacndfuchx[e] => fuc-L[e] + lacnfucpt[e] | 0   | ((BT_1625 or BT_4136) and ((BT_4134 and BT_4135) or (BT_1630 and BT_1631))) | 0     | 1000 | 4  | HMO Degradation                  | PMID: 22036470 | B. thetaiotaomicron grows on human milk oligosaccharides (HMOs); numerous glycosidase hydrolases are upregulated during growth on HMOs. Involves alpha-fucosidase and susC/ SusD (binding proteins). | 3.2.1.51  |

| SEED Rxn ID | BIGG Rxn ID           | Function                                                                                                    | Formula                                                          | Rev | GA                                                                                                                                                                                                                                                                                                                                                                                                                                                   | LB | UB   | CS | Subsystem                         | Reference      | Notes                                                                                                                                                                                                                                                                                   | EC Number |
|-------------|-----------------------|-------------------------------------------------------------------------------------------------------------|------------------------------------------------------------------|-----|------------------------------------------------------------------------------------------------------------------------------------------------------------------------------------------------------------------------------------------------------------------------------------------------------------------------------------------------------------------------------------------------------------------------------------------------------|----|------|----|-----------------------------------|----------------|-----------------------------------------------------------------------------------------------------------------------------------------------------------------------------------------------------------------------------------------------------------------------------------------|-----------|
|             | LACNFUCPT_FU<br>CASEe | alpha-fucosidase,<br>Lacto-N-fucopentaose<br>(extracellular)                                                | h2o[e] +<br>lacnfucpt[e] =><br>fuc-L[e] +<br>lacnttr[e]          | 0   | ((BT_1625 or<br>BT_4136) and<br>((BT_4134<br>and BT_4135)<br>or (BT_1630<br>and<br>BT_1631)))                                                                                                                                                                                                                                                                                                                                                        | 0  | 1000 | 4  | HMO<br>Degradation                | PMID: 22036470 | B. thetaiotaomicron<br>grows on human milk<br>oligosaccharides<br>(HMOs); numerous<br>glycosidase<br>hydrolases are<br>upregulated during<br>growth on HMOs.<br>Involves alpha-<br>fucosidase and susC/<br>SusD (binding<br>proteins).                                                  | 3.2.1.51  |
|             | LACNTTR_DEGe          | Lacto-N-tetraose<br>degradation by beta-<br>galactosidase and N-<br>acetylglucosaminidase,<br>extracellular | 2 h2o[e] +<br>lacnttr[e] =><br>lcts[e] +<br>acgam[e] +<br>gal[e] | 0   | ((BT_1626 or<br>BT_0461) and<br>(BT_1627 or<br>BT_1632 or<br>BT_4132 or<br>BT_0459 or<br>BT_0460 or<br>BT_1038 or<br>BT_1044 or<br>BT_1048 or<br>BT_1051 or<br>BT_4295 or<br>BT_2825) and<br>((BT_1630<br>and BT_1631)<br>or (BT_4134<br>and BT_4135)<br>or (BT_1039<br>and BT_1040)<br>or (BT_1042<br>and BT_1043)<br>or (BT_1046<br>and BT_1047)<br>or (BT_4297<br>and BT_4298)<br>or (BT_2818<br>and BT_2819)<br>or (BT_2820<br>and<br>BT_2821))) | 0  | 1000 | 3  | HMO<br>Degradation                | MID: 22036470  | Growth on this<br>human milk<br>oligosaccharide is<br>very slow and<br>inefficient, but<br>detectable. No<br>information on<br>growth on Lacto-N-<br>neotetraose is<br>available. Involves<br>beta-galactosidase,<br>N-<br>acetylglucosaminidas<br>e, susC, susD<br>(binding proteins). |           |
|             | LACZe                 | b-galactosidase,<br>extracellular                                                                           | h2o[e] + lcts[e]<br>=> glc-D[e] +<br>gal[e]                      | 0   | (BT_1626 or<br>BT_4050)                                                                                                                                                                                                                                                                                                                                                                                                                              | 0  | 1000 | 3  | Alternate<br>Carbon<br>Metabolism | PMID:16968696  | Genes are<br>upregulated in the<br>presence of lactose<br>from mother's milk.                                                                                                                                                                                                           | 3.2.1.23  |

| SEED Rxn ID | BIGG Rxn ID | Function                                            | Formula                                            | Rev | GA                                                                                                | LB    | UB   | CS | Subsystem                                          | Reference                     | Notes                                                                                                                                                                                                                                                                                          | EC Number |
|-------------|-------------|-----------------------------------------------------|----------------------------------------------------|-----|---------------------------------------------------------------------------------------------------|-------|------|----|----------------------------------------------------|-------------------------------|------------------------------------------------------------------------------------------------------------------------------------------------------------------------------------------------------------------------------------------------------------------------------------------------|-----------|
| rxn01270    | LARGNAT     | L-arogenate:2-oxoglutarate aminotransferase         | Largn[c] + oaa[c] <=> h[c] + asp-L[c] + pphn[c]    | 1   | BT_3935                                                                                           | -1000 | 1000 | 2  | Tyrosine, Tryptophan, and Phenylalanine Metabolism |                               | Added manually to BIGG database based on SEED database                                                                                                                                                                                                                                         | 2.6.1.57  |
|             | LCAR2       | Lactaldehyde reductase (glycolaldehyde)             | h[c] + nadh[c] + gcald[c] <=> 12ethd[c] + nad[c]   | 1   | BT_3767                                                                                           | -1000 | 1000 | 2  | Alternate Carbon Metabolism                        | PMID:3308886                  | Lactaldehyde dehydrogenase accepts glycolaldehyde as substrate (also shown in KEGG Pathway).                                                                                                                                                                                                   | 1.1.1.77  |
| rxn01615    | LCARS       | lactaldehyde reductase (S-propane-1,2-diol forming) | h[c] + nadh[c] + lald-L[c] <=> 12ppd-S[c] + nad[c] | 1   | BT_3767                                                                                           | -1000 | 1000 | 4  | Alternate Carbon Metabolism                        | PMID: 18848625, PMID:10449780 | Demonstrated to be involved both in L-fucose and L-rhamnose utilization pathway.                                                                                                                                                                                                               | 1.1.1.77  |
| rxn00500    | LDH_D       | D-lactate dehydrogenase                             | nad[c] + lac-D[c] <=> h[c] + pyr[c] + nadh[c]      | 1   | BT_1575                                                                                           | -1000 | 1000 | 4  | Central Metabolism                                 | PMID:19525515                 | Demonstrated by biochemical assay for B. thetaiotaomicron.                                                                                                                                                                                                                                     | 1.1.1.28  |
| rxn00499    | LDH_L       | L-lactate dehydrogenase                             | nad[c] + lac-L[c] <=> h[c] + pyr[c] + nadh[c]      | 1   | (BT_4455 and BT_4456 and BT_4457)                                                                 | -1000 | 1000 | 3  | Central Metabolism                                 | PMID:148460                   | Gene annotation was proposed by The SEED Viewer, however, the reaction was not included in the draft model generated by Model SEED. No other genome database confirms this annotation. However, L-lactate dehydrogenase was demonstrated in the closely related organism Bacteroides fragilis. | 1.1.1.27  |
|             | LEUGLY1c    | Hydrolysis of L-Leucylglycine                       | h2o[c] + leugly[c] => gly[c] + leu-L[c]            | 0   | (BT_3464 or BT_3926 or BT_3996 or BT_0149 or BT_4193 or BT_3254 or BT_1260 or BT_1261 or BT_1314) | 0     | 1000 | 2  | Peptide Degradation                                |                               |                                                                                                                                                                                                                                                                                                |           |

| SEED Rxn ID | BIGG Rxn ID | Function                                                                 | Formula                                                                                                            | Rev | GA                                                                                                | LB | UB   | CS | Subsystem                | Reference     | Notes                                                                                                                                                         | EC Number |
|-------------|-------------|--------------------------------------------------------------------------|--------------------------------------------------------------------------------------------------------------------|-----|---------------------------------------------------------------------------------------------------|----|------|----|--------------------------|---------------|---------------------------------------------------------------------------------------------------------------------------------------------------------------|-----------|
|             | LEUGLYLAPe  | hydrolysis of Leucylglycine by predicted non-cytosolic leucine peptidase | $\text{h}_2\text{o}[\text{e}] + \text{leugly}[\text{e}] \Rightarrow \text{gly}[\text{e}] + \text{leu-L}[\text{e}]$ | 0   | BT_2548                                                                                           | 0  | 1000 | 2  | Peptide Degradation      | PMID:12663928 | Predicted non-cytosolic by Xu et al. (2003): "A Genomic View of the Human-B. thetaiotaomicron Symbiosis.". Assumed to be extracellular for modeling purposes. | 3.4.11.15 |
|             | LEUGLYt     | L-Leucylglycine transport via proton symport                             | $\text{h}[\text{e}] + \text{leugly}[\text{e}] \Rightarrow \text{h}[\text{c}] + \text{leugly}[\text{c}]$            | 0   | (BT_0580 or BT_4385 or BT_1086)                                                                   | 0  | 1000 | 2  | Transport, Extracellular |               | Genes added based on TransportDB (last consulted 06.06.12).                                                                                                   |           |
|             | LEULEU1c    | Hydrolysis of L-leucyl-L-leucine                                         | $\text{h}_2\text{o}[\text{c}] + \text{leuleu}[\text{c}] \Rightarrow 2 \text{ leu-L}[\text{c}]$                     | 0   | (BT_3464 or BT_3926 or BT_3996 or BT_0149 or BT_4193 or BT_3254 or BT_1260 or BT_1261 or BT_1314) | 0  | 1000 | 2  | Peptide Degradation      |               |                                                                                                                                                               |           |
|             | LEULEULAPe  | hydrolysis of Leucylleucine by predicted non-cytosolic leucine peptidase | $\text{h}_2\text{o}[\text{e}] + \text{leuleu}[\text{e}] \Rightarrow \text{leu-L}[\text{e}]$                        | 0   | BT_2548                                                                                           | 0  | 1000 | 2  | Peptide Degradation      | PMID:12663928 | Predicted non-cytosolic by Xu et al. (2003): "A Genomic View of the Human-B. thetaiotaomicron Symbiosis.". Assumed to be extracellular for modeling purposes. | 3.4.11.15 |
|             | LEULEUt     | L-leucyl-L-leucine transport via proton symport                          | $\text{h}[\text{e}] + \text{leuleu}[\text{e}] \Rightarrow \text{h}[\text{c}] + \text{leuleu}[\text{c}]$            | 0   | (BT_0580 or BT_4385 or BT_1086)                                                                   | 0  | 1000 | 2  | Transport, Extracellular |               | Genes added based on TransportDB (last consulted 06.06.12).                                                                                                   |           |

| SEED Rxn ID | BIGG Rxn ID | Function                                          | Formula                                                                                                                                                                            | Rev | GA      | LB    | UB   | CS | Subsystem                                  | Reference                                                                                                                                          | Notes                                                                                                                                                                                                                                                                                                                                                                                                                                                                                                                        | EC Number |
|-------------|-------------|---------------------------------------------------|------------------------------------------------------------------------------------------------------------------------------------------------------------------------------------|-----|---------|-------|------|----|--------------------------------------------|----------------------------------------------------------------------------------------------------------------------------------------------------|------------------------------------------------------------------------------------------------------------------------------------------------------------------------------------------------------------------------------------------------------------------------------------------------------------------------------------------------------------------------------------------------------------------------------------------------------------------------------------------------------------------------------|-----------|
|             | LEUO        | Leucine oxidation by gut bacteria                 | $2 \text{ h}_2\text{o}[\text{c}] + 3 \text{ leu-L}[\text{c}] \Rightarrow \text{co}_2[\text{c}] + 3 \text{ nh}_4[\text{c}] + 2 \text{ isocapr}[\text{c}] + \text{isoval}[\text{c}]$ | 0   |         | 0     | 1000 | 2  | Valine, Leucine, and Isoleucine Metabolism | PMID:1541601, PMID:3572204, PMID:16887608, Krieg, N. R. (2010). Bergey's manual of systematic bacteriology, 2nd ed., volume 4. New York, Springer. | Valine and leucine are oxidized by gut bacteria to BCFA (branched-chain fatty acids) with one less carbon atom (isobutyrate and isovalerate, respectively), CO <sub>2</sub> and ammonia. Isocaproate is also formed in the large intestine by reduction of leucine. This reaction formula is hypothetical, no information on exact pathway and involved enzymes is available. KEGG does not provide any pathway information either. Isobutyrate and isovalerate are known secretion products of <i>B. thetaiotaomicron</i> . |           |
| rxn05243    | LEUt2r      | L-leucine reversible transport via proton symport | $\text{h}[\text{e}] + \text{leu-L}[\text{e}] \rightleftharpoons \text{h}[\text{c}] + \text{leu-L}[\text{c}]$                                                                       | 1   |         | -1000 | 1000 | 2  | Transport, Extracellular                   | PMID:7462155                                                                                                                                       | <i>B. thetaiotaomicron</i> incorporates leucine, valine and isoleucine into its phospholipids, which suggests the presence of a transporter for these amino acids. However, it is not known which gene encodes this transporter.                                                                                                                                                                                                                                                                                             |           |
| rxn00806    | LEUTA       | leucine transaminase                              | $\text{akg}[\text{c}] + \text{leu-L}[\text{c}] \rightleftharpoons \text{glu-L}[\text{c}] + 4\text{mop}[\text{c}]$                                                                  | 1   | BT_3892 | -1000 | 1000 | 2  | Valine, Leucine, and Isoleucine Metabolism |                                                                                                                                                    |                                                                                                                                                                                                                                                                                                                                                                                                                                                                                                                              | 2.6.1.6   |

| SEED Rxn ID | BIGG Rxn ID | Function                      | Formula                                                            | Rev | GA                                | LB | UB   | CS | Subsystem                        | Reference                 | Notes                                                                                                                                                                         | EC Number |
|-------------|-------------|-------------------------------|--------------------------------------------------------------------|-----|-----------------------------------|----|------|----|----------------------------------|---------------------------|-------------------------------------------------------------------------------------------------------------------------------------------------------------------------------|-----------|
|             | LEVANASE_1e | Extracellular levanase        | 249 h2o[e] + levan1000[e] => 250 levanttr[e]                       | 0   | (BT_1760 and BT_1762 and BT_1763) | 0  | 1000 | 4  | Plant Polysaccharide Degradation | PMID:20603004             | B. thetaiotaomicron utilizes levan from host's diet as carbon source. BT_1762 (susD homolog) is required for efficient levan binding, presumably also BT_1763 (susC homolog). | 3.2.1.65  |
|             | LEVANASE_2e | Extracellular levanase        | h2o[e] + levanttr[e] => fru[e] + levanttr[e]                       | 0   | (BT_1759 or BT_3082 or BT_1760)   | 0  | 1000 | 4  | Plant Polysaccharide Degradation | PMID:20603004             | B. thetaiotaomicron utilizes levanoligosaccharides .                                                                                                                          | 3.2.1.65  |
|             | LEVANASE_3e | Extracellular levanase        | h2o[e] + levanttr[e] => fru[e] + levantb[e]                        | 0   | (BT_1759 or BT_3082 or BT_1760)   | 0  | 1000 | 4  | Plant Polysaccharide Degradation | PMID:20603004             | B. thetaiotaomicron utilizes levanoligosaccharides .                                                                                                                          | 3.2.1.65  |
|             | LEVANASE_4e | Extracellular levanase        | h2o[e] + levantb[e] => 2 fru[e]                                    | 0   | (BT_1759 or BT_3082 or BT_1760)   | 0  | 1000 | 4  | Plant Polysaccharide Degradation | PMID:20603004             | B. thetaiotaomicron utilizes levanoligosaccharides .                                                                                                                          | 3.2.1.65  |
|             | LEVANB_ABC  | levanbiose transport          | h2o[c] + atp[c] + levantb[e] => h[c] + pi[c] + adp[c] + levantb[c] | 0   |                                   | 0  | 1000 | 2  | Plant Polysaccharide Degradation | PMID:20603004             | B. thetaiotaomicron has an intracellular levanbiose-degrading fructanase, therefore presence of a transport reaction is assumed.                                              |           |
| rxn01834    | LGTHL       | lactoylglutathione lyase      | mthgxl[c] + gthrd[c] => lgt-S[c]                                   | 0   | BT_1580                           | 0  | 1000 | 2  | Central Metabolism               |                           | Reversible reaction in Model SEED                                                                                                                                             | 4.4.1.5   |
|             | LMN2e       | laminaribiase (extracellular) | h2o[e] + lmn2[e] => 2 glc-D[e]                                     | 0   | (BT_2550 or BT_2824 or BT_3683)   | 0  | 1000 | 4  | Plant Polysaccharide Degradation | PMID:879772, PMID:9178362 | B. thetaiotaomicron grows on laminaran, products are laminaribiose and glucose.                                                                                               | 3.2.1.6   |
|             | LMNe        | Laminarinase (extracellular)  | 14 h2o[e] + lmn30[e] => 15 lmn2[e]                                 | 0   | (BT_2550 or BT_2824 or BT_3683)   | 0  | 1000 | 4  | Plant Polysaccharide Degradation | PMID:879772, PMID:9178362 | B. thetaiotaomicron grows on laminaran, products are laminaribiose and glucose.                                                                                               | 3.2.1.6   |

| SEED Rxn ID | BIGG Rxn ID | Function                                                        | Formula                                                                                                                       | Rev | GA      | LB    | UB   | CS | Subsystem                       | Reference                                                           | Notes                                                                                                                                                                                                                                                      | EC Number |
|-------------|-------------|-----------------------------------------------------------------|-------------------------------------------------------------------------------------------------------------------------------|-----|---------|-------|------|----|---------------------------------|---------------------------------------------------------------------|------------------------------------------------------------------------------------------------------------------------------------------------------------------------------------------------------------------------------------------------------------|-----------|
|             | LPADSS_BT   | lipidA_bt disaccharide synthase                                 | lipidX_bt[c] + u2ga_bt[c] => 2 h[c] + udp[c] + lipidAds_bt[c]                                                                 | 0   | BT_4004 | 0     | 1000 | 4  | Lipopolysaccharide Biosynthesis | PMID:18931137, PMID:19460428, PMID:20974832                         | Based on H. pylori LPS biosynthesis (BIGG database), as in the P. gingivalis reconstruction (PMID:18931137). P. gingivalis' LPS is similar in structure to the Bacteroides LPS. Based on structural information taken from (PMID:19460428, PMID:20974832). | 2.4.1.182 |
|             | LPS_BTabc   | Lipopolysaccharide transport out via ABC system                 | h2o[c] + atp[c] + lps_bt[c] => h[c] + pi[c] + adp[c] + lps_bt[c]                                                              | 0   |         | 0     | 1000 | 2  | Transport, Extracellular        | PMID:18931137, PMID:19460428, PMID:20974832                         | Based on H. pylori LPS biosynthesis (BIGG database), as in the P. gingivalis reconstruction (PMID:18931137). P. gingivalis' LPS is similar in structure to the Bacteroides LPS.                                                                            |           |
|             | LPSSYN_BT   | Formation for LPS from Core oligosaccharide-Lipid A and O-chain | 2 uacgam[c] + adphec-DD[c] + 3 gdpfuc[c] + udpg[c] + core_lps_bt[c] + 2 udpgal[c] => adp[c] + 3 gdp[c] + 5 udp[c] + lps_bt[c] | 0   |         | 0     | 1000 | 2  | Lipopolysaccharide Biosynthesis | PMID:18931137, PMID:19460428, PMID:20974832. See also PMID:15774760 | Based on H. pylori LPS biosynthesis (BIGG database), as in the P. gingivalis reconstruction (PMID:18931137). P. gingivalis' LPS is similar in structure to the Bacteroides LPS. Based on structural information taken from (PMID:19460428, PMID:20974832). |           |
| rxn00321    | LYSAM       | Lysine 2,3-aminomutase (EC 5.4.3.2)                             | lys-L[c] <=> 36dahx[c]                                                                                                        | 1   | BT_4474 | -1000 | 1000 | 2  | Threonine and Lysine Metabolism |                                                                     |                                                                                                                                                                                                                                                            | 5.4.3.2   |
| rxn00322    | LYSDC       | lysine decarboxylase                                            | h[c] + lys-L[c] => co2[c] + 15dap[c]                                                                                          | 0   | BT_3307 | 0     | 1000 | 2  | Threonine and Lysine Metabolism |                                                                     | Added based on annotation from KEGG Pathway                                                                                                                                                                                                                | 4.1.1.18  |

| SEED Rxn ID | BIGG Rxn ID | Function                                                 | Formula                                                                  | Rev | GA                                                                                                | LB    | UB   | CS | Subsystem                        | Reference                                   | Notes                                                                                                                  | EC Number |
|-------------|-------------|----------------------------------------------------------|--------------------------------------------------------------------------|-----|---------------------------------------------------------------------------------------------------|-------|------|----|----------------------------------|---------------------------------------------|------------------------------------------------------------------------------------------------------------------------|-----------|
| rxn05305    | LYSt3r      | L-lysine transport out via proton antiport reversible    | $h[e] + lys-L[c] \rightleftharpoons h[c] + lys-L[e]$                     | 1   | BT_1732                                                                                           | -1000 | 1000 | 2  | Transport, Extracellular         | PMID:10867063                               | The gut microbiota supplies the host with lysine (essential amino acid for humans).                                    |           |
|             | MALCOACD    | Malonyl-CoA condensation catalyzed by FabH               | $h[c] + malACP[c] + malcoam[c] \Rightarrow coa[c] + 3ogACPm[c] + co2[c]$ | 0   | (BT_0122 or BT_3834)                                                                              | 0     | 1000 | 3  | Biotin Metabolism                | PMID:20693992                               | Based on biotin synthesis described in PMID:20693992 for E. coli.                                                      |           |
|             | MALCOAMT    | Malonyl-CoA methyltransferase BioC                       | $malcoa[c] + amet[c] \Rightarrow ahcys[c] + malcoam[c]$                  | 0   | BT_1445                                                                                           | 0     | 1000 | 3  | Biotin Metabolism                | PMID:20693992                               | Based on biotin synthesis described in PMID:20693992 for E. coli. Malonyl-CoA is considered the most likely substrate. |           |
| rxn00022    | MALT        | alpha-glucosidase                                        | $h2o[c] + malt[c] \Rightarrow 2\ glc-D[c]$                               | 0   | (BT_0132 or BT_0683 or BT_2620 or BT_3163 or BT_3169 or BT_3294 or BT_3299 or BT_3664 or BT_4581) | 0     | 1000 | 3  | Plant Polysaccharide Degradation | PMID: 10986238                              | The starch and maltooligosaccharide utilization system of B. thetaiotaomicron is well characterized.                   | 3.2.1.20  |
|             | MALTe       | alpha-glucosidase, extracellular                         | $h2o[e] + malt[e] \Rightarrow 2\ glc-D[e]$                               | 0   | (BT_3704 or BT_3703)                                                                              | 0     | 1000 | 4  | Plant Polysaccharide Degradation | PMID:18981178, PMID:18611383, PMID:10986238 | The starch and maltooligosaccharide utilization system of B. thetaiotaomicron is well characterized.                   | 3.2.1.20  |
|             | MALTt2r     | maltose transport in via proton symport reversible       | $h[e] + malt[e] \rightleftharpoons h[c] + malt[c]$                       | 1   |                                                                                                   | -1000 | 1000 | 2  | Transport, Extracellular         | PMID: 10986238                              | B. thetaiotaomicron grows on maltose.                                                                                  |           |
| rxn00640    | MAN1PT2r    | mannose-1-phosphate guanylyltransferase (GDP) reversible | $h[c] + gdp[c] + man1p[c] \rightleftharpoons pi[c] + gdpmann[c]$         | 1   | BT_0558                                                                                           | -1000 | 1000 | 2  | Alternate Carbon Metabolism      |                                             |                                                                                                                        | 2.7.7.22  |
| rxn00559    | MAN6PI      | mannose-6-phosphate isomerase                            | $man6p[c] \rightleftharpoons f6p[c]$                                     | 1   | BT_0373                                                                                           | -1000 | 1000 | 2  | Alternate Carbon Metabolism      |                                             |                                                                                                                        | 5.3.1.8   |

| SEED Rxn ID | BIGG Rxn ID | Function                                    | Formula                                                                           | Rev | GA                                                                                                                                                                                                   | LB    | UB   | CS | Subsystem                        | Reference                     | Notes                                                                                                                                                                                                                                         | EC Number |
|-------------|-------------|---------------------------------------------|-----------------------------------------------------------------------------------|-----|------------------------------------------------------------------------------------------------------------------------------------------------------------------------------------------------------|-------|------|----|----------------------------------|-------------------------------|-----------------------------------------------------------------------------------------------------------------------------------------------------------------------------------------------------------------------------------------------|-----------|
|             | MANA1e      | beta-mannosidase, mannobiose degradation    | $\text{h2o[e]} + \text{manb[e]} \Rightarrow 2 \text{ man[e]}$                     | 0   | (BT_0458 or BT_2855 or BT_4074 or BT_2432 or BT_3599 or BT_1769 or BT_1878 or BT_2199 or BT_3773 or BT_3784 or BT_3858 or BT_3962 or BT_3965 or BT_3990 or BT_3991 or BT_4073 or BT_4092 or BT_4093) | 0     | 1000 | 4  | Plant Polysaccharide Degradation | PMID:17287210, PMID: 20081828 | BT_0458 gene product was purified and characterized. Shown to have high activity on mannobiose and especially mannotriose, mannose and mannopentaose. Most enzymes in this GPR of the GH92 family were shown to be active against mannobiose. | 3.2.1.25  |
|             | MANA2e      | beta-mannosidase, mannotriose degradation   | $\text{h2o[e]} + \text{mantr[e]} \Rightarrow \text{man[e]} + \text{manb[e]}$      | 0   | (BT_0458 or BT_2855 or BT_4074 or BT_2432 or BT_3599)                                                                                                                                                | 0     | 1000 | 4  | Plant Polysaccharide Degradation | PMID:17287210                 | BT_0458 gene product was purified and characterized. Shown to have high activity on mannobiose and especially mannotriose, mannose and mannopentaose.                                                                                         | 3.2.1.25  |
|             | MANA3e      | beta-mannosidase, mannotetraose degradation | $\text{h2o[e]} + \text{mantr[e]} \Rightarrow \text{man[e]} + \text{mantr[e]}$     | 0   | (BT_0458 or BT_2855 or BT_4074 or BT_2432 or BT_3599)                                                                                                                                                | 0     | 1000 | 4  | Plant Polysaccharide Degradation | PMID:17287210                 | BT_0458 gene product was purified and characterized. Shown to have high activity on mannobiose and especially mannotriose, mannose and mannopentaose.                                                                                         | 3.2.1.25  |
| rxn03838    | MANA4       | mannase                                     | $\text{h2o[c]} + \text{mantr[c]} \Leftrightarrow \text{gal[c]} + \text{melib[c]}$ | 1   | (BT_1871 or BT_2851 or BT_3065 or BT_3131 or BT_3133 or BT_3410)                                                                                                                                     | -1000 | 1000 | 4  | Plant Polysaccharide Degradation | PMID:17287210                 | B. thetaiotaomicron grows on mannotriose.                                                                                                                                                                                                     | 3.2.1.22  |

| SEED Rxn ID | BIGG Rxn ID | Function                                                | Formula                                                        | Rev | GA                                                    | LB    | UB   | CS | Subsystem                                  | Reference                                   | Notes                                                                                                                                                 | EC Number |
|-------------|-------------|---------------------------------------------------------|----------------------------------------------------------------|-----|-------------------------------------------------------|-------|------|----|--------------------------------------------|---------------------------------------------|-------------------------------------------------------------------------------------------------------------------------------------------------------|-----------|
|             | MANA4e      | beta-mannosidase, mannopentaose degradation             | h2o[e] + manpt[e] => man[e] + manttr[e]                        | 0   | (BT_0458 or BT_2855 or BT_4074 or BT_2432 or BT_3599) | 0     | 1000 | 4  | Plant Polysaccharide Degradation           | PMID:17287210                               | BT_0458 gene product was purified and characterized. Shown to have high activity on mannobiose and especially mannotriose, mannose and mannopentaose. | 3.2.1.25  |
|             | MANabc      | mannose transport via ABC transporter                   | h2o[c] + atp[c] + man[e] => h[c] + pi[c] + adp[c] + man[c]     | 0   | BT_1536                                               | 0     | 1000 | 3  | Transport, Extracellular                   | PMID: 22205877                              | B. thetaiotaomicron grows on mannose and alpha-mannan. The ABC transporter BT_1536 is upregulated during growth on alpha-mannan.                      |           |
| rxn01775    | MANAO       | Mannonate oxidoreductase                                | nad[c] + mana[c] <=> h[c] + nadh[c] + fruor[c]                 | 1   | (BT_0130 or BT_1433)                                  | -1000 | 1000 | 2  | Alternate Carbon Metabolism                |                                             |                                                                                                                                                       | 1.1.1.57  |
|             | MANTRabc    | mannotriose transport via ABC transporter               | h2o[c] + atp[c] + mantr[e] => h[c] + pi[c] + adp[c] + mantr[c] | 0   |                                                       | 0     | 1000 | 2  | Transport, Extracellular                   | PMID:17287210                               | B. thetaiotaomicron grows on mannotriose.                                                                                                             |           |
| rxn05465    | MCOATA      | Malonyl-CoA-ACP transacylase                            | ACP[c] + malcoa[c] <=> coa[c] + malACP[c]                      | 1   | BT_0789                                               | -1000 | 1000 | 3  | Glycerophospholipid Metabolism             | PMID: 6102980, PMID: 7440508, PMID: 7204330 |                                                                                                                                                       | 2.3.1.85  |
| rxn00248    | MDH         | malate dehydrogenase                                    | nad[c] + mal-L[c] <=> h[c] + nadh[c] + oaa[c]                  | 1   | (BT_2510 or BT_3911)                                  | -1000 | 1000 | 4  | TCA Cycle                                  | PMID: 11260473                              | Demonstrated by biochemical assay.                                                                                                                    | 1.1.1.37  |
| rxn00161    | ME2         | malic enzyme (NADP)                                     | nadp[c] + mal-L[c] => pyr[c] + nadph[c] + co2[c]               | 0   | BT_1969                                               | 0     | 1000 | 4  | Central Metabolism                         | PMID:148460                                 | Demonstrated in the close relative B. fragilis.                                                                                                       | 1.1.1.40  |
| rxn05293    | MECDPDH2    | 2C-methyl-D-erythritol 2,4 cyclodiphosphate dehydratase | nadh[c] + 2mecdp[c] => h2o[c] + nad[c] + h2mb4p[c]             | 0   | BT_2517                                               | 0     | 1000 | 2  | Cofactor and Prosthetic Group Biosynthesis |                                             |                                                                                                                                                       | 1.17.7.1  |
| rxn03910    | MECDPS      | 2-C-methyl-D-erythritol 2,4-cyclodiphosphate synthase   | 2p4c2me[c] => cmp[c] + 2mecdp[c]                               | 0   | BT_3884                                               | 0     | 1000 | 2  | Cofactor and Prosthetic Group Biosynthesis |                                             | Reversible reaction in Model SEED                                                                                                                     | 4.6.1.12  |

| SEED Rxn ID | BIGG Rxn ID | Function                                               | Formula                                                        | Rev | GA                                                                                                           | LB    | UB   | CS | Subsystem                                  | Reference     | Notes                                                                    | EC Number |
|-------------|-------------|--------------------------------------------------------|----------------------------------------------------------------|-----|--------------------------------------------------------------------------------------------------------------|-------|------|----|--------------------------------------------|---------------|--------------------------------------------------------------------------|-----------|
|             | MELIBabc    | melibiose transport via ABC system (import)            | h2o[c] + atp[c] + melib[e] => h[c] + pi[c] + adp[c] + melib[c] | 0   |                                                                                                              | 0     | 1000 | 2  | Transport, Extracellular                   | PMID:2557798  | B. thetaiotaomicron grows on melibiose.                                  |           |
|             | MEOHt2      | Methanol diffusion                                     | meoh[e] <=> meoh[c]                                            | 1   |                                                                                                              | -1000 | 1000 | 2  | Transport, Extracellular                   | PMID:20693992 | Biotin synthesis pathway as proposed by PMID:20693992 produces methanol. |           |
| rxn03907    | MEPCT       | 2-C-methyl-D-erythritol 4-phosphate cytidyltransferase | h[c] + ctp[c] + 2me4p[c] => ppi[c] + 4c2me[c]                  | 0   | (BT_1651 or BT_2881 or BT_3923)                                                                              | 0     | 1000 | 2  | Cofactor and Prosthetic Group Biosynthesis |               | Reversible reaction in Model SEED                                        | 2.7.7.60  |
| rxn12636    | METALA1c    | Hydrolysis of L-methionyl-L-alanine                    | h2o[c] + metala[c] <=> ala-L[c] + met-L[c]                     | 1   | (BT_3464 or BT_3926 or BT_3996 or BT_0149 or BT_4193 or BT_3254 or BT_1260 or BT_1261 or BT_1314 or BT_1838) | -1000 | 1000 | 2  | Peptide Degradation                        |               |                                                                          |           |
|             | METALAt     | L-methionyl-L-alanine transport via proton symport     | h[e] + metala[e] => h[c] + metala[c]                           | 0   | (BT_0580 or BT_4385 or BT_1086)                                                                              | 0     | 1000 | 2  | Transport, Extracellular                   |               | Genes added based on TransportDB (last consulted 06.06.12).              |           |
| rxn00126    | METAT       | methionine adenosyltransferase                         | h2o[c] + atp[c] + met-L[c] => pi[c] + ppi[c] + amet[c]         | 0   | BT_3219                                                                                                      | 0     | 1000 | 2  | Methionine Metabolism                      |               |                                                                          | 2.5.1.6   |
|             | METOX1s     | methionine oxidation (spontaneous)                     | h2o2[c] + met-L[c] => h2o[c] + metsox-S-L[c]                   | 0   |                                                                                                              | 0     | 1000 | 1  | Methionine Metabolism                      |               |                                                                          |           |
| rxn06077    | METSOXR1    | L-methionine-S-oxide reductase                         | trdrd[c] + metsox-S-L[c] => h2o[c] + trdox[c] + met-L[c]       | 0   | BT_2499                                                                                                      | 0     | 1000 | 2  | Methionine Metabolism                      |               | Reversible reaction in Model SEED                                        | 1.8.4.5   |

| SEED Rxn ID | BIGG Rxn ID | Function                                                    | Formula                                                    | Rev | GA                              | LB    | UB   | CS | Subsystem                | Reference                                                                                                                | Notes                                                                                                                                                                                                                             | EC Number |
|-------------|-------------|-------------------------------------------------------------|------------------------------------------------------------|-----|---------------------------------|-------|------|----|--------------------------|--------------------------------------------------------------------------------------------------------------------------|-----------------------------------------------------------------------------------------------------------------------------------------------------------------------------------------------------------------------------------|-----------|
| rxn00693    | METSr       | 5-Methyltetrahydrofolate L-homocysteine S-methyltransferase | hcys-L[c] + 5mthf[c] <=> h[c] + thf[c] + met-L[c]          | 1   | (BT_0180 or BT_0249 or BT_0342) | -1000 | 1000 | 3  | Methionine Metabolism    | Dworkin, M. and S. Falkow (2006). The prokaryotes : a handbook on the biology of bacteria. New York ; [London], Springer | BT_0180: Evidence at protein level (PDB entry 3k13). B. thetaiotaomicron is vitamin B12 dependent, vitamin B12 requirement can be replaced by methionine -> indirect evidence, since vitamin B12 is cofactor for this enzyme      | 2.1.1.13  |
|             | METt2r      | L-methionine reversible transport via proton symport        | h[e] + met-L[e] <=> h[c] + met-L[c]                        | 1   | BT_1270                         | -1000 | 1000 | 2  | Transport, Extracellular | PMID:10867063                                                                                                            | Gut microbiota contribute to host amino acid homeostasis. Methionine is an essential amino acid for humans. This annotation (Methionine transporter MetT) is only supported by The SEED.                                          |           |
| rxn10571    | MG2abc      | magnesium transport via ABC system                          | h2o[c] + atp[c] + mg2[e] => h[c] + pi[c] + adp[c] + mg2[c] | 0   | BT_0988                         | 0     | 1000 | 4  | Transport, Extracellular | PMID:4472783                                                                                                             | Added by Model SEED during auto-completion step in pipeline. The reaction was confirmed during manual inspection: a gene for Mg2+ transport ATPase is annotated in its genome. B. thetaiotaomicron requires magnesium for growth. |           |
| rxn00748    | MGSA        | methylglyoxal synthase                                      | dhap[c] => pi[c] + mthgl[c]                                | 0   | (BT_1098 or BT_2150)            | 0     | 1000 | 3  | Central Metabolism       | PMID:18848625                                                                                                            | Supported by the observation that propanediol is still formed when lactaldehyde dehydrogenase is knocked out.                                                                                                                     | 4.2.3.3   |

| SEED Rxn ID | BIGG Rxn ID | Function                                        | Formula                                | Rev | GA                   | LB    | UB   | CS | Subsystem                     | Reference      | Notes                                                                                                               | EC Number |
|-------------|-------------|-------------------------------------------------|----------------------------------------|-----|----------------------|-------|------|----|-------------------------------|----------------|---------------------------------------------------------------------------------------------------------------------|-----------|
| rxn05616    | MGt5        | magnesium transport in/out via permease (no H+) | mg2[c] <=> mg2[e]                      | 1   | (BT_4042 or BT_4679) | -1000 | 1000 | 4  | Transport, Extracellular      | PMID:4472783   | Irreversible reaction in SEED. B. thetaiotaomicron requires magnesium for growth.                                   |           |
| rxn00881    | MI1PP       | myo-inositol 1-phosphatase                      | h2o[c] + mi1p-D[c] => pi[c] + inost[c] | 0   | BT_2801              | 0     | 1000 | 2  | Inositol Phosphate Metabolism |                |                                                                                                                     | 3.1.3.25  |
| rxn00609    | MI1PS       | myo-Inositol-1-phosphate synthase               | g6p[c] => mi1p-D[c]                    | 0   | BT_1526              | 0     | 1000 | 2  | Inositol Phosphate Metabolism |                | Reversible reaction in Model SEED                                                                                   | 5.5.1.4   |
| rxn00883    | MI3PP       | myo-inositol 3-phosphatase                      | h2o[c] + mi3p-D[c] => pi[c] + inost[c] | 0   | BT_2801              | 0     | 1000 | 2  | Inositol Phosphate Metabolism |                |                                                                                                                     | 3.1.3.25  |
| rxn00882    | MI4PP       | myo-inositol 4-phosphatase                      | h2o[c] + mi4p-D[c] => pi[c] + inost[c] | 0   | BT_2801              | 0     | 1000 | 2  | Inositol Phosphate Metabolism |                |                                                                                                                     | 3.1.3.25  |
|             | MK10t       | Menaquinone secretion/uptake (menaquinone 10)   | mqn10[c] <=> mqn10[e]                  | 1   |                      | -1000 | 1000 | 2  | Transport, Extracellular      | PMID: 18841274 | Gut microbiota, in particular Bacteroides, produce menaquinone, which contributes to host vitamin K homeostasis. AH |           |
|             | MK11t       | Menaquinone secretion/uptake (menaquinone 11)   | mqn11[c] <=> mqn11[e]                  | 1   |                      | -1000 | 1000 | 2  | Transport, Extracellular      | PMID: 18841274 | Gut microbiota, in particular Bacteroides, produce menaquinone, which contributes to host vitamin K homeostasis. AH |           |
|             | MK7t        | Menaquinone secretion/uptake (menaquinone 7)    | mqn7[c] <=> mqn7[e]                    | 1   |                      | -1000 | 1000 | 2  | Transport, Extracellular      | PMID: 18841274 | Gut microbiota, in particular Bacteroides, produce menaquinone, which contributes to host vitamin K homeostasis. AH |           |
|             | MK8t        | Menaquinone secretion/uptake (menaquinone 8)    | mqn8[c] <=> mqn8[e]                    | 1   |                      | -1000 | 1000 | 2  | Transport, Extracellular      | PMID: 18841274 | Gut microbiota, in particular Bacteroides, produce menaquinone, which contributes to host vitamin K homeostasis. AH |           |

| SEED Rxn ID | BIGG Rxn ID | Function                                                | Formula                                       | Rev | GA                   | LB    | UB   | CS | Subsystem                        | Reference                                                  | Notes                                                                                                                                                                                                                    | EC Number |
|-------------|-------------|---------------------------------------------------------|-----------------------------------------------|-----|----------------------|-------|------|----|----------------------------------|------------------------------------------------------------|--------------------------------------------------------------------------------------------------------------------------------------------------------------------------------------------------------------------------|-----------|
|             | MK9t        | Menaquinone secretion/<br>uptake (menaquinone 9)        | mqn9[c] <=><br>mqn9[e]                        | 1   |                      | -1000 | 1000 | 2  | Transport,<br>Extracellular      | PMID: 18841274                                             | Gut microbiota, in particular Bacteroides, produce menaquinone, which contributes to host vitamin K homeostasis. AH                                                                                                      |           |
| rxn05746    | MLTG1       | Maltodextrin glucosidase (maltotriose)                  | h2o[c] + malttr[c] =><br>malt[c] + glc-D[c]   | 0   | BT_4690              | 0     | 1000 | 2  | Plant Polysaccharide Degradation | PMID:848954                                                | Added based on annotation from NCBI Gene. There may also be other cytoplasmatic enzymes carrying out this reaction. The starch and maltooligosaccharide utilization system of B. thetaiotaomicron is well characterized. | 3.2.1.1   |
|             | MLTG1e      | Maltodextrin glucosidase (maltotriose), extracellular   | h2o[e] + malttr[e] => glc-D[e] + malt[e]      | 0   | (BT_3703 or BT_3704) | 0     | 1000 | 4  | Plant Polysaccharide Degradation | PMID:10986238, PMID:2722747, PMID: 18981178, PMID:18611383 | The starch and maltooligosaccharide utilization system of B. thetaiotaomicron is well characterized.                                                                                                                     | 3.2.1.1   |
| rxn08933    | MLTG2       | Maltodextrin glucosidase (maltotetraose)                | h2o[c] + malttr[c] =><br>malttr[c] + glc-D[c] | 0   | BT_4690              | 0     | 1000 | 2  | Plant Polysaccharide Degradation | PMID:848954                                                | Added based on annotation from NCBI Gene. There may also be other cytoplasmatic enzymes carrying out this reaction. The starch and maltooligosaccharide utilization system of B. thetaiotaomicron is well characterized. | 3.2.1.1   |
|             | MLTG2e      | Maltodextrin glucosidase (maltotetraose), extracellular | h2o[e] + malttr[e] =><br>glc-D[e] + malttr[e] | 0   | (BT_3703 or BT_3704) | 0     | 1000 | 4  | Plant Polysaccharide Degradation | PMID: 18981178, PMID:18611383                              | The starch and maltooligosaccharide utilization system of B. thetaiotaomicron is well characterized.                                                                                                                     | 3.2.1.1   |

| SEED Rxn ID | BIGG Rxn ID | Function                                                | Formula                                                                            | Rev | GA                                                                                                            | LB | UB   | CS | Subsystem                        | Reference                                                               | Notes                                                                                                                                                                                                                    | EC Number |
|-------------|-------------|---------------------------------------------------------|------------------------------------------------------------------------------------|-----|---------------------------------------------------------------------------------------------------------------|----|------|----|----------------------------------|-------------------------------------------------------------------------|--------------------------------------------------------------------------------------------------------------------------------------------------------------------------------------------------------------------------|-----------|
| rxn08934    | MLTG3       | Maltodextrin glucosidase (maltopentaose)                | $\text{h2o[c]} + \text{maltpt[c]} \Rightarrow \text{glc-D[c]} + \text{maltttr[c]}$ | 0   | BT_4690                                                                                                       | 0  | 1000 | 2  | Plant Polysaccharide Degradation | PMID:848954                                                             | Added based on annotation from NCBI Gene. There may also be other cytoplasmatic enzymes carrying out this reaction. The starch and maltooligosaccharide utilization system of B. thetaiotaomicron is well characterized. | 3.2.1.1   |
|             | MLTG3e      | Maltodextrin glucosidase (maltopentaose), extracellular | $\text{h2o[e]} + \text{maltpt[e]} \Rightarrow \text{glc-D[e]} + \text{maltttr[e]}$ | 0   | (BT_3703 or BT_3704)                                                                                          | 0  | 1000 | 4  | Plant Polysaccharide Degradation | PMID:18981178, PMID:18611383                                            | The starch and maltooligosaccharide utilization system of B. thetaiotaomicron is well characterized.                                                                                                                     | 3.2.1.1   |
| rxn08935    | MLTG4       | Maltodextrin glucosidase (maltohexaose)                 | $\text{h2o[c]} + \text{malthx[c]} \Rightarrow \text{glc-D[c]} + \text{maltpt[c]}$  | 0   | BT_4690                                                                                                       | 0  | 1000 | 2  | Plant Polysaccharide Degradation | PMID:848954                                                             | Added based on annotation from NCBI Gene. There may also be other cytoplasmatic enzymes carrying out this reaction. The starch and maltooligosaccharide utilization system of B. thetaiotaomicron is well characterized. | 3.2.1.1   |
|             | MLTG4e      | Maltodextrin glucosidase (maltohexaose), extracellular  | $\text{h2o[e]} + \text{malthx[e]} \Rightarrow \text{glc-D[e]} + \text{maltpt[e]}$  | 0   | ((BT_3698 and BT_3701 and BT_3702) or (BT_0773 and BT_3701 and BT_3702) or (BT_4305 and BT_3701 and BT_3702)) | 0  | 1000 | 4  | Plant Polysaccharide Degradation | PMID:10986238, PMID:2722747, PMID:8955399, PMID:18981178, PMID:18611383 | The starch and maltooligosaccharide utilization system of B. thetaiotaomicron is well characterized.                                                                                                                     | 3.2.1.1   |

| SEED Rxn ID | BIGG Rxn ID | Function                                                | Formula                                    | Rev | GA                                                                                                            | LB    | UB   | CS | Subsystem                        | Reference                                                               | Notes                                                                                                                                                                                                                    | EC Number |
|-------------|-------------|---------------------------------------------------------|--------------------------------------------|-----|---------------------------------------------------------------------------------------------------------------|-------|------|----|----------------------------------|-------------------------------------------------------------------------|--------------------------------------------------------------------------------------------------------------------------------------------------------------------------------------------------------------------------|-----------|
| rxn08936    | MLTG5       | Maltodextrin glucosidase (maltoheptaose)                | h2o[c] + malthp[c] => glc-D[c] + malthx[c] | 0   | BT_4690                                                                                                       | 0     | 1000 | 2  | Plant Polysaccharide Degradation | PMID:848954                                                             | Added based on annotation from NCBI Gene. There may also be other cytoplasmatic enzymes carrying out this reaction. The starch and maltooligosaccharide utilization system of B. thetaiotaomicron is well characterized. | 3.2.1.1   |
|             | MLTG5e      | Maltodextrin glucosidase (maltoheptaose), extracellular | h2o[e] + malthp[e] => glc-D[e] + malthx[e] | 0   | ((BT_3698 and BT_3701 and BT_3702) or (BT_0773 and BT_3701 and BT_3702) or (BT_4305 and BT_3701 and BT_3702)) | 0     | 1000 | 4  | Plant Polysaccharide Degradation | PMID:10986238, PMID:2722747, PMID:8955399, PMID:18981178, PMID:18611383 | The starch and maltooligosaccharide utilization system of B. thetaiotaomicron is well characterized.                                                                                                                     | 3.2.1.1   |
| rxn00672    | MMCD        | Methylmalonyl-CoA decarboxylase                         | h[c] + mmcoa-S[c] => co2[c] + ppcoa[c]     | 0   | (BT_1686 and BT_1689 and BT_4415)                                                                             | 0     | 1000 | 3  | Central Metabolism               | PMID: 148460                                                            | Demonstrated experimentally in Bacteroides fragilis.                                                                                                                                                                     | 4.1.1.9   |
| rxn01996    | MME         | methylmalonyl-CoA epimerase                             | mmcoa-R[c] <=> mmcoa-S[c]                  | 1   | BT_1685                                                                                                       | -1000 | 1000 | 2  | Central Metabolism               | PMID:148460                                                             | Demonstrated experimentally in Bacteroides fragilis.                                                                                                                                                                     | 5.1.99.1  |
| rxn00602    | MMM2r       | Methylmalonyl-CoA mutase                                | succoa[c] <=> mmcoa-R[c]                   | 1   | (BT_2090 and BT_2091)                                                                                         | -1000 | 1000 | 3  | Central Metabolism               | PMID: 148460                                                            | Confirmed for B. fragilis, vitamin B12-dependent                                                                                                                                                                         | 5.4.99.2  |
| rxn03885    | MNNH        | D-mannonate hydrolyase                                  | mana[c] => h2o[c] + 2ddgln[c]              | 0   | (BT_0129 or BT_1432)                                                                                          | 0     | 1000 | 2  | Alternate Carbon Metabolism      |                                                                         |                                                                                                                                                                                                                          | 4.2.1.8   |
| rxn05618    | MNt2        | manganese transport in via proton symport               | h[e] + mn2[e] => h[c] + mn2[c]             | 0   | BT_0629                                                                                                       | 0     | 1000 | 2  | Transport, Extracellular         |                                                                         |                                                                                                                                                                                                                          |           |

| SEED Rxn ID | BIGG Rxn ID | Function                                           | Formula                                                   | Rev | GA                   | LB    | UB   | CS | Subsystem                                  | Reference                                   | Notes                                                                                                                                                                                                                                                      | EC Number |
|-------------|-------------|----------------------------------------------------|-----------------------------------------------------------|-----|----------------------|-------|------|----|--------------------------------------------|---------------------------------------------|------------------------------------------------------------------------------------------------------------------------------------------------------------------------------------------------------------------------------------------------------------|-----------|
|             | MOAT_BT     | 3-deoxy-D-manno-octulosonic acid transferase       | ckdo[c] + lipidA_bt[c] => h[c] + cmp[c] + kdolipid4_bt[c] | 0   | BT_2747              | 0     | 1000 | 4  | Lipopolysaccharide Biosynthesis            | PMID:18931137, PMID:19460428, PMID:20974832 | Based on H. pylori LPS biosynthesis (BIGG database), as in the P. gingivalis reconstruction (PMID:18931137). P. gingivalis' LPS is similar in structure to the Bacteroides LPS. Based on structural information taken from (PMID:19460428, PMID:20974832). | 2.4.99.12 |
| rxn00912    | MOHMT       | 3-methyl-2-oxobutanoate hydroxymethyltransferase   | h2o[c] + 3mob[c] + mlthf[c] => thf[c] + 2dhp[c]           | 0   | BT_0698              | 0     | 1000 | 2  | Cofactor and Prosthetic Group Biosynthesis |                                             | Reversible reaction in Model SEED                                                                                                                                                                                                                          | 2.1.2.11  |
| rxn01021    | MTAN        | methylthioadenosine nucleosidase                   | h2o[c] + 5mta[c] => ade[c] + 5mtr[c]                      | 0   | BT_4451              | 0     | 1000 | 2  | Arginine and Proline Metabolism            |                                             |                                                                                                                                                                                                                                                            | 3.2.2.16  |
| rxn01211    | MTHFC       | methenyltetrahydrofolate cyclohydrolase            | h2o[c] + methf[c] <=> h[c] + 10fthf[c]                    | 1   | (BT_0737 or BT_1607) | -1000 | 1000 | 2  | Folate Metabolism                          |                                             |                                                                                                                                                                                                                                                            | 3.5.4.9   |
| rxn00907    | MTHFD       | methylenetetrahydrofolate dehydrogenase (NADP)     | nadp[c] + mlthf[c] <=> nadph[c] + methf[c]                | 1   | BT_1607              | -1000 | 1000 | 2  | Folate Metabolism                          |                                             |                                                                                                                                                                                                                                                            | 1.5.1.5   |
| rxn04954    | MTHFR2      | 5,10-methylenetetrahydrofolate reductase (NADH)    | 2 h[c] + nadh[c] + mlthf[c] => nad[c] + 5mthf[c]          | 0   | BT_3821              | 0     | 1000 | 2  | Folate Metabolism                          |                                             | Reversible reaction in Model SEED                                                                                                                                                                                                                          | 1.5.1.20  |
| rxn00910    | MTHFR3      | 5,10-methylenetetrahydrofolate reductase (NADPH)   | 2 h[c] + nadph[c] + mlthf[c] => nadp[c] + 5mthf[c]        | 0   | BT_3821              | 0     | 1000 | 2  | Folate Metabolism                          |                                             |                                                                                                                                                                                                                                                            | 1.5.1.20  |
|             | MTHGXLt     | Methylglyoxal transport (cytosol to extracellular) | mthgxl[c] => mthgxl[e]                                    | 0   |                      | 0     | 1000 | 2  | Transport, Extracellular                   | PMID:11260473                               | B. thetaiotaomicron produces weak amounts of methylglyoxal.                                                                                                                                                                                                |           |

| SEED Rxn ID | BIGG Rxn ID | Function                                            | Formula                                                 | Rev | GA                                                                                                                                                                  | LB    | UB   | CS | Subsystem                                  | Reference                                 | Notes                                                                                                                                                                                              | EC Number |
|-------------|-------------|-----------------------------------------------------|---------------------------------------------------------|-----|---------------------------------------------------------------------------------------------------------------------------------------------------------------------|-------|------|----|--------------------------------------------|-------------------------------------------|----------------------------------------------------------------------------------------------------------------------------------------------------------------------------------------------------|-----------|
|             | NACHEX27e   | beta-N-acetylhexosaminidase, hyaluronan degradation | h2o[e] + ha_deg1[e] => acgam[e] + ha_pre1[e]            | 0   | (BT_4394 or BT_4395 or BT_4337 or BT_3598 or BT_1627 or BT_3868 or BT_0459 or BT_0460 or BT_0506 or BT_4681 or BT_1621 or BT_3178 or BT_0456 or BT_1051 or BT_2459) | 0     | 1000 | 4  | Glycosaminoglycan Degradation              | PMID:16565725, PMID:20689974, PMID:848954 | BT_4395 gene product was purified and characterized. B. thetaiotaomicron ferments hyaluronan.                                                                                                      | 3.2.1.52  |
|             | NACt        | Nicotinate secretion/uptake                         | nac[c] <=> nac[e]                                       | 1   |                                                                                                                                                                     | -1000 | 1000 | 2  | Transport, Extracellular                   | PMID: 19748469                            | B. thetaiotaomicron mutants in NAD biosynthesis are not essential in vitro on tryptone-yeast extract-glucose medium, suggesting that B. thetaiotaomicron can uptake nicotinate from yeast extract. |           |
|             | NADDP       | NAD diphosphatase                                   | h2o[c] + nad[c] => 2 h[c] + amp[c] + nmh[c]             | 0   | BT_1544                                                                                                                                                             | 0     | 1000 | 2  | Cofactor and Prosthetic Group Biosynthesis |                                           |                                                                                                                                                                                                    | 3.6.1.22  |
| rxn08971    | NADH10      | NADH dehydrogenase (menaquinone-8 & 0 protons)      | h[c] + nadh[c] + mqn8[c] => nad[c] + mql8[c]            | 0   | BT_1537                                                                                                                                                             | 0     | 1000 | 2  | Central Metabolism                         |                                           |                                                                                                                                                                                                    | 1.6.5.3   |
|             | NADH17      | NADH dehydrogenase (menaquinone-8 & 3 protons)      | 4 h[c] + nadh[c] + mqn8[c] => nad[c] + 3 h[e] + mql8[c] | 0   | (BT_4058 and BT_4059 and BT_4060 and BT_4061 and BT_4062 and BT_4063 and BT_4064 and BT_4065 and BT_4066 and BT_4067)                                               | 0     | 1000 | 4  | Central Metabolism                         | PMID:12777495                             | The reaction is linked to fumarate reductase. The exact stoichiometry is unknown, formula was putatively added based on E. coli iAF1260.                                                           | 1.6.5.3   |

| SEED Rxn ID | BIGG Rxn ID | Function                                                | Formula                                                                                       | Rev | GA      | LB | UB   | CS | Subsystem                                  | Reference    | Notes                                                                                                                                                                                               | EC Number |
|-------------|-------------|---------------------------------------------------------|-----------------------------------------------------------------------------------------------|-----|---------|----|------|----|--------------------------------------------|--------------|-----------------------------------------------------------------------------------------------------------------------------------------------------------------------------------------------------|-----------|
| rxn08975    | NADH5       | NADH dehydrogenase (ubiquinone-8 )                      | $h[c] + nadh[c] + q8[c] \Rightarrow nad[c] + q8h2[c]$                                         | 0   | BT_1537 | 0  | 1000 | 2  | Central Metabolism                         | PMID: 893348 | It is unclear whether B. thetaiotaomicron uses ubiquinone, menaquinone or both. PMID: 893348 states that only menaquinone is present, however ubiquinone-using enzymes are annotated in the genome. | 1.6.5.3   |
| rxn08976    | NADH9       | NADH dehydrogenase (demethylmenaquinone -8 & 0 protons) | $h[c] + nadh[c] + 2dmmq8[c] \Rightarrow nad[c] + 2dmmql8[c]$                                  | 0   | BT_1537 | 0  | 1000 | 2  | Central Metabolism                         | PMID: 893348 | It is unclear whether B. thetaiotaomicron uses ubiquinone, menaquinone or both. PMID: 893348 states that only menaquinone is present, however ubiquinone-using enzymes are annotated in the genome. | 1.6.5.3   |
| rxn00077    | NADK        | NAD kinase                                              | $nad[c] + atp[c] \Rightarrow h[c] + nadp[c] + adp[c]$                                         | 0   | BT_3917 | 0  | 1000 | 2  | NAD Metabolism                             |              |                                                                                                                                                                                                     | 2.7.1.23  |
| rxn10060    | NADK2       | NAD kinase (dTTP)                                       | $nad[c] + dttp[c] \Rightarrow h[c] + nadp[c] + dtdp[c]$                                       | 0   | BT_3917 | 0  | 1000 | 2  | NAD Metabolism                             |              | Added manually to BIGG database based on SEED database.                                                                                                                                             | 2.7.1.23  |
| rxn00138    | NADS1       | NAD synthase (nh3)                                      | $atp[c] + nh4[c] + dnad[c] \Rightarrow h[c] + nad[c] + amp[c] + ppi[c]$                       | 0   | BT_0205 | 0  | 1000 | 2  | Cofactor and Prosthetic Group Biosynthesis |              |                                                                                                                                                                                                     | 6.3.1.5   |
| rxn00190    | NADS2       | NAD synthase (glutamine-hydrolysing)                    | $h2o[c] + atp[c] + gln-L[c] + dnad[c] \Rightarrow h[c] + glu-L[c] + nad[c] + amp[c] + ppi[c]$ | 0   | BT_0205 | 0  | 1000 | 2  | NAD Metabolism                             |              |                                                                                                                                                                                                     | 6.3.5.1   |
| rxn01265    | NAMNPP      | nicotinic acid mononucleotide pyrophosphorylase         | $h2o[c] + atp[c] + prpp[c] + nac[c] \Rightarrow pi[c] + adp[c] + ppi[c] + nicrnt[c]$          | 0   | BT_1913 | 0  | 1000 | 2  | Cofactor and Prosthetic Group Biosynthesis |              | Reversible reaction in Model SEED                                                                                                                                                                   | 2.4.2.11  |

| SEED Rxn ID | BIGG Rxn ID | Function                                 | Formula                                                  | Rev | GA                   | LB    | UB   | CS | Subsystem                              | Reference                                                                                                                                              | Notes                                                                                                                                                                                                                                                                                                                                                      | EC Number |
|-------------|-------------|------------------------------------------|----------------------------------------------------------|-----|----------------------|-------|------|----|----------------------------------------|--------------------------------------------------------------------------------------------------------------------------------------------------------|------------------------------------------------------------------------------------------------------------------------------------------------------------------------------------------------------------------------------------------------------------------------------------------------------------------------------------------------------------|-----------|
|             | NARK        | Nitrite transport in                     | no2[c] => no2[e]                                         | 0   |                      | 0     | 1000 | 2  | ROS Detoxification                     | Dworkin, M. and S. Falkow (2006). The prokaryotes : a handbook on the biology of bacteria. New York ; [London], Springer, PMID:14665678, PMID:16183308 | Nitrite appears to be produced from NH4 by nitrite reductase (the reaction does not seem to go the other way since nitrite does not serve as nitrogen source). Nitrite does not react further to nitric oxide (or only in very slight amounts) (PMID:16183308). It is assumed that nitrite is transported out via diffusion through porin (PMID:14665678). |           |
| rxn05209    | NA13_1      | sodium proton antiporter (H:NA is 1:1)   | na1[c] + h[e] <=> h[c] + na1[e]                          | 1   | (BT_0634 or BT_3638) | -1000 | 1000 | 2  | Transport, Extracellular               |                                                                                                                                                        |                                                                                                                                                                                                                                                                                                                                                            |           |
| rxn00853    | NCPTRCA     | N-Carbamoylputrescine amidase            | h2o[c] + 2 h[c] + ncptrc[c] => co2[c] + nh4[c] + ptrc[c] | 0   | BT_0875              | 0     | 1000 | 3  | Spermidine and Putrescine Biosynthesis | PMID:10801923                                                                                                                                          | The reaction is involved in the putrescine secretion pathway.                                                                                                                                                                                                                                                                                              | 3.5.1.53  |
| rxn00237    | NDPK1       | nucleoside-diphosphate kinase (ATP:GDP)  | atp[c] + gdp[c] <=> adp[c] + gtp[c]                      | 1   | BT_3925              | -1000 | 1000 | 2  | Nucleotide Salvage Pathway             |                                                                                                                                                        |                                                                                                                                                                                                                                                                                                                                                            | 2.7.4.6   |
| rxn00117    | NDPK2       | nucleoside-diphosphate kinase (ATP:UDP)  | atp[c] + udp[c] <=> adp[c] + utp[c]                      | 1   | BT_3925              | -1000 | 1000 | 2  | Nucleotide Salvage Pathway             |                                                                                                                                                        |                                                                                                                                                                                                                                                                                                                                                            | 2.7.4.6   |
| rxn00409    | NDPK3       | nucleoside-diphosphate kinase (ATP:CDP)  | atp[c] + cdp[c] <=> adp[c] + ctp[c]                      | 1   | BT_3925              | -1000 | 1000 | 2  | Nucleotide Salvage Pathway             |                                                                                                                                                        |                                                                                                                                                                                                                                                                                                                                                            | 2.7.4.6   |
| rxn01512    | NDPK4       | nucleoside-diphosphate kinase (ATP:dTDP) | atp[c] + dtdp[c] <=> adp[c] + dttp[c]                    | 1   | BT_3925              | -1000 | 1000 | 2  | Nucleotide Salvage Pathway             |                                                                                                                                                        |                                                                                                                                                                                                                                                                                                                                                            | 2.7.4.6   |
| rxn01353    | NDPK5       | nucleoside-diphosphate kinase (ATP:dGDP) | atp[c] + dgdg[c] <=> adp[c] + dgtp[c]                    | 1   | BT_3925              | -1000 | 1000 | 2  | Nucleotide Salvage Pathway             |                                                                                                                                                        |                                                                                                                                                                                                                                                                                                                                                            | 2.7.4.6   |
| rxn01678    | NDPK6       | nucleoside-diphosphate kinase (ATP:dUDP) | atp[c] + dudp[c] <=> adp[c] + dutp[c]                    | 1   | BT_3925              | -1000 | 1000 | 2  | Nucleotide Salvage Pathway             |                                                                                                                                                        |                                                                                                                                                                                                                                                                                                                                                            | 2.7.4.6   |
| rxn01673    | NDPK7       | nucleoside-diphosphate kinase (ATP:dCDP) | atp[c] + dcdp[c] <=> adp[c] + dctp[c]                    | 1   | BT_3925              | -1000 | 1000 | 2  | Nucleotide Salvage Pathway             |                                                                                                                                                        |                                                                                                                                                                                                                                                                                                                                                            | 2.7.4.6   |

| SEED Rxn ID | BIGG Rxn ID        | Function                                              | Formula                                                   | Rev | GA                                           | LB    | UB   | CS | Subsystem                                  | Reference      | Notes                                                                                                                                                                            | EC Number |
|-------------|--------------------|-------------------------------------------------------|-----------------------------------------------------------|-----|----------------------------------------------|-------|------|----|--------------------------------------------|----------------|----------------------------------------------------------------------------------------------------------------------------------------------------------------------------------|-----------|
| rxn00839    | NDPK8              | nucleoside-diphosphate kinase (ATP:dADP)              | atp[c] + dadp[c] <=> adp[c] + dadp[c]                     | 1   | BT_3925                                      | -1000 | 1000 | 2  | Nucleotide Salvage Pathway                 |                |                                                                                                                                                                                  | 2.7.4.6   |
| rxn00515    | NDPK9              | nucleoside-diphosphate kinase (ATP:IDP)               | atp[c] + idp[c] <=> adp[c] + itp[c]                       | 1   | BT_3925                                      | -1000 | 1000 | 2  | Nucleotide Salvage Pathway                 |                |                                                                                                                                                                                  | 2.7.4.6   |
|             | NEULACNTTR_S IASEe | sialidase, Sialyllacto-N-tetraose                     | h2o[e] + neulacnttr[e] => acnam[e] + lacnttr[e]           | 0   | BT_0455 or BT_2194 or BT_2892                | 0     | 1000 | 4  | HMO Degradation                            | PMID: 22036470 | B. thetaiomicron liberates sialic acid from human milk oligosaccharides, though it cannot use it. Lacto-N-tetraose is poorly metabolized and accumulates if BT is grown on HMOs. | 3.2.1.18  |
| rxn05466    | NH4t               | ammonia reversible transport                          | nh4[e] <=> nh4[c]                                         | 1   | BT_0544                                      | -1000 | 1000 | 2  | Transport, Extracellular                   |                |                                                                                                                                                                                  |           |
|             | NMNt2r             | NMN transport via proton symport reversible           | h[c] + nmnc[c] <=> h[e] + nmnc[e]                         | 1   | BT_2396                                      | -1000 | 1000 | 2  | Transport, Extracellular                   |                | Annotation from NCBI Gene (last updated 01.01.11)                                                                                                                                |           |
| rxn02155    | NNATr              | nicotinate-nucleotide adenyltransferase               | h[c] + atp[c] + nicrnt[c] <=> ppi[c] + dnad[c]            | 1   | BT_2011                                      | -1000 | 1000 | 2  | NAD Metabolism                             |                |                                                                                                                                                                                  | 2.7.7.18  |
| rxn02402    | NNDPR              | nicotinate-nucleotide diphosphorylase (carboxylating) | 2 h[c] + prpp[c] + quln[c] => co2[c] + ppi[c] + nicrnt[c] | 0   | BT_1560                                      | 0     | 1000 | 2  | NAD Metabolism                             |                |                                                                                                                                                                                  | 2.4.2.19  |
| rxn01647    | NP1_r              | nucleotide phosphatase                                | h[c] + nac[c] + r1p[c] <=> pi[c] + nicrns[c]              | 1   | (BT_1881 or BT_4554)                         | -1000 | 1000 | 2  | NAD Metabolism                             |                |                                                                                                                                                                                  | E2.4.2.1  |
| rxn02898    | NPHS               | naphthoate synthase                                   | sbzcoa[c] => coa[c] + dhna[c]                             | 0   | BT_4702                                      | 0     | 1000 | 2  | Cofactor and Prosthetic Group Biosynthesis |                |                                                                                                                                                                                  | 4.1.3.36  |
| rxn02400    | NT5C               | Nicotinate D-ribonucleotide phosphohydrolase          | h2o[c] + nicrnt[c] => pi[c] + nicrns[c]                   | 0   | (BT_1236 or BT_2440 and BT_2441))            | 0     | 1000 | 2  | NAD Metabolism                             |                |                                                                                                                                                                                  | 3.1.3.5   |
| rxn01521    | NTD1               | 5'-nucleotidase (dUMP)                                | h2o[c] + dump[c] => pi[c] + duri[c]                       | 0   | (BT_1236 or BT_4003 or BT_2440 and BT_2441)) | 0     | 1000 | 2  | Nucleotide Salvage Pathway                 |                |                                                                                                                                                                                  | 3.1.3.5   |
| rxn01961    | NTD10              | 5'-nucleotidase (XMP)                                 | h2o[c] + xmp[c] => pi[c] + xtsn[c]                        | 0   | (BT_1236 or BT_2440 and BT_2441))            | 0     | 1000 | 2  | Nucleotide Salvage Pathway                 |                |                                                                                                                                                                                  | 3.1.3.5   |

| SEED Rxn ID | BIGG Rxn ID | Function                                               | Formula                                           | Rev | GA                                       | LB | UB   | CS | Subsystem                        | Reference | Notes                                          | EC Number |
|-------------|-------------|--------------------------------------------------------|---------------------------------------------------|-----|------------------------------------------|----|------|----|----------------------------------|-----------|------------------------------------------------|-----------|
| rxn00831    | NTD11       | 5'-nucleotidase (IMP)                                  | h2o[c] + imp[c]<br>=> pi[c] + ins[c]              | 0   | (BT_1236 or<br>(BT_2440 and<br>BT_2441)) | 0  | 1000 | 2  | Nucleotide<br>Salvage<br>Pathway |           |                                                | 3.1.3.5   |
| rxn00708    | NTD2        | 5'-nucleotidase (UMP)                                  | h2o[c] + ump[c]<br>=> pi[c] + uri[c]              | 0   | (BT_1236 or<br>(BT_2440 and<br>BT_2441)) | 0  | 1000 | 2  | Nucleotide<br>Salvage<br>Pathway |           |                                                | 3.1.3.5   |
| rxn01218    | NTD3        | 5'-nucleotidase<br>(dCMP)                              | h2o[c] + dcmp[c]<br>=> pi[c] +<br>dcyt[c]         | 0   | (BT_1236 or<br>(BT_2440 and<br>BT_2441)) | 0  | 1000 | 2  | Nucleotide<br>Salvage<br>Pathway |           |                                                | 3.1.3.5   |
| rxn00363    | NTD4        | 5'-nucleotidase (CMP)                                  | h2o[c] + cmp[c]<br>=> pi[c] +<br>cytd[c]          | 0   | (BT_1236 or<br>(BT_2440 and<br>BT_2441)) | 0  | 1000 | 2  | Nucleotide<br>Salvage<br>Pathway |           |                                                | 3.1.3.5   |
| rxn01145    | NTD5        | 5'-nucleotidase (dTMP)                                 | h2o[c] + dtmp[c]<br>=> pi[c] +<br>thymd[c]        | 0   | (BT_1236 or<br>(BT_2440 and<br>BT_2441)) | 0  | 1000 | 2  | Nucleotide<br>Salvage<br>Pathway |           |                                                | 3.1.3.5   |
| rxn01670    | NTD5_a      | Nicotinamide<br>ribonucleotide<br>phosphohydrolase     | h2o[c] + nmnc[c]<br>=> pi[c] +<br>rnam[c]         | 0   | (BT_1236 or<br>(BT_2440 and<br>BT_2441)) | 0  | 1000 | 2  | NAD<br>Metabolism                |           |                                                | 3.1.3.5   |
| rxn01507    | NTD6        | 5'-nucleotidase<br>(dAMP)                              | h2o[c] + damp[c]<br>=> pi[c] + dad-<br>2[c]       | 0   | (BT_1236 or<br>(BT_2440 and<br>BT_2441)) | 0  | 1000 | 2  | Nucleotide<br>Salvage<br>Pathway |           |                                                | 3.1.3.5   |
| rxn00132    | NTD7        | 5'-nucleotidase (AMP)                                  | h2o[c] + amp[c]<br>=> pi[c] + adn[c]              | 0   | (BT_1236 or<br>(BT_2440 and<br>BT_2441)) | 0  | 1000 | 2  | Nucleotide<br>Salvage<br>Pathway |           |                                                | 3.1.3.5   |
| rxn01445    | NTD8        | 5'-nucleotidase<br>(dGMP)                              | h2o[c] + dgmp[c]<br>=> pi[c] +<br>dgsn[c]         | 0   | (BT_1236 or<br>(BT_2440 and<br>BT_2441)) | 0  | 1000 | 2  | Nucleotide<br>Salvage<br>Pathway |           |                                                | 3.1.3.5   |
| rxn00913    | NTD9        | 5'-nucleotidase (GMP)                                  | h2o[c] + gmp[c]<br>=> pi[c] + gsn[c]              | 0   | (BT_1236 or<br>(BT_2440 and<br>BT_2441)) | 0  | 1000 | 2  | Nucleotide<br>Salvage<br>Pathway |           |                                                | 3.1.3.5   |
| rxn00062    | NTP1        | nucleoside-<br>triphosphatase (ATP)                    | h2o[c] + atp[c]<br>=> h[c] + pi[c] +<br>adp[c]    | 0   | BT_3128                                  | 0  | 1000 | 2  | Nucleotide<br>Salvage<br>Pathway |           |                                                | 3.6.1.15  |
| rxn01351    | NTPP1       | Nucleoside triphosphate<br>pyrophosphorylase<br>(dgtp) | h2o[c] + dgtp[c]<br>=> h[c] + ppi[c]<br>+ dgmp[c] | 0   | BT_4350                                  | 0  | 1000 | 2  | Nucleotide<br>Salvage<br>Pathway |           | Reviewed by NCBI<br>Gene (updated<br>01.01.11) | 3.6.1.19  |
| rxn02518    | NTPP10      | Nucleoside triphosphate<br>pyrophosphorylase<br>(ditp) | h2o[c] + ditp[c]<br>=> h[c] + ppi[c]<br>+ dimp[c] | 0   | BT_4350                                  | 0  | 1000 | 2  | Nucleotide<br>Salvage<br>Pathway |           | Reviewed by NCBI<br>Gene (updated<br>01.01.11) | 3.6.1.19  |
| rxn01962    | NTPP11      | Nucleoside triphosphate<br>pyrophosphorylase<br>(xtp)  | h2o[c] + xtp[c]<br>=> h[c] + ppi[c]<br>+ xmp[c]   | 0   | BT_4350                                  | 0  | 1000 | 2  | Nucleotide<br>Salvage<br>Pathway |           | Reviewed by NCBI<br>Gene (updated<br>01.01.11) | 3.6.1.19  |
| rxn00301    | NTPP2       | Nucleoside triphosphate<br>pyrophosphorylase<br>(gtp)  | h2o[c] + gtp[c]<br>=> h[c] + ppi[c]<br>+ gmp[c]   | 0   | BT_4350                                  | 0  | 1000 | 2  | Nucleotide<br>Salvage<br>Pathway |           | Reviewed by NCBI<br>Gene (updated<br>01.01.11) | 3.6.1.19  |

| SEED Rxn ID | BIGG Rxn ID | Function                                               | Formula                                                                  | Rev | GA                                                                                                 | LB    | UB   | CS | Subsystem                        | Reference                                                               | Notes                                                                                                                                                                    | EC Number |
|-------------|-------------|--------------------------------------------------------|--------------------------------------------------------------------------|-----|----------------------------------------------------------------------------------------------------|-------|------|----|----------------------------------|-------------------------------------------------------------------------|--------------------------------------------------------------------------------------------------------------------------------------------------------------------------|-----------|
| rxn00463    | NTPP8       | Nucleoside triphosphate pyrophosphorylase (utp)        | h2o[c] + utp[c] => h[c] + ump[c] + ppi[c]                                | 0   | BT_4350                                                                                            | 0     | 1000 | 2  | Nucleotide Salvage Pathway       |                                                                         | Reviewed by NCBI Gene (updated 01.01.11)                                                                                                                                 | 3.6.1.19  |
| rxn00514    | NTPP9       | Nucleoside triphosphate pyrophosphorylase (itp)        | h2o[c] + itp[c] => h[c] + ppi[c] + imp[c]                                | 0   | BT_4350                                                                                            | 0     | 1000 | 2  | Nucleotide Salvage Pathway       |                                                                         | Reviewed by NCBI Gene (updated 01.01.11)                                                                                                                                 | 3.6.1.19  |
| rxn01352    | NTPTP1      | Nucleoside triphosphate triphosphatase                 | h2o[c] + dgtp[c] => ppp[c] + dgsn[c]                                     | 0   | (BT_3460 or BT_4208)                                                                               | 0     | 1000 | 2  | Nucleotide Salvage Pathway       |                                                                         | BT_4208: evidence at protein level (PDB entry 2q14)                                                                                                                      | 3.1.5.1   |
| rxn03978    | NTRIR5      | Cytochrome c nitrite reductase                         | 2 h2o[c] + nh4[c] + 6 ficytcc553[c] <=> 8 h[c] + 6 focytc553[c] + no2[c] | 1   | BT_1417                                                                                            | -1000 | 1000 | 2  | Nitrogen Metabolism              |                                                                         | Added manually to BIGG database based on SEED database                                                                                                                   | 1.7.2.2   |
|             | O16G2e      | oligo-1,6-glucosidase (strch2 ->strch3), extracellular | h2o[e] + strch2[e] => glc-D[e] + malt[e]                                 | 0   | BT_3299                                                                                            | 0     | 1000 | 4  | Plant Polysaccharide Degradation | PMID:10986238, PMID:2722747, PMID:8955399, PMID:18981178, PMID:18611383 | Starch utilization by B. thetaiotaomicron as sole carbon source is well established.                                                                                     | 3.2.1.10  |
| rxn05468    | O2t         | o2 transport (diffusion)                               | o2[e] <=> o2[c]                                                          | 1   |                                                                                                    | -1000 | 1000 | 1  | Transport, Extracellular         |                                                                         |                                                                                                                                                                          |           |
| rxn00162    | OAADC       | oxaloacetate decarboxylase                             | h[c] + oaa[c] => pyr[c] + co2[c]                                         | 0   | ((BT_1696 and BT_1697 and BT_1698) or BT_1689 or BT_4415)                                          | 0     | 1000 | 4  | Central Metabolism               | PMID: 148460                                                            | Confirmed for B. fragilis                                                                                                                                                | 4.1.1.3   |
| rxn04794    | OBTF1       | 2-Oxobutanoate formate lyase                           | coa[c] + 2obut[c] => ppcoa[c] + for[c]                                   | 0   | ((BT_1055 and BT_2955) or (BT_4738 and BT_1055) or (BT_2955 and BT_2956) or (BT_4737 and BT_4738)) | 0     | 1000 | 2  | Alternate Carbon Metabolism      | PMID: 8048843                                                           | Second reaction of pyruvate formate lyase. Presence of enzyme in Bacteroides xylanolyticus confirmed (PMID: 8048843).                                                    | 2.3.1.54  |
|             | OGALURLe    | Oligogalacturonate lyase (extracellular)               | unsdigalur[e] => 2 dt5hsu[e]                                             | 0   | (BT_4115 or BT_4116)                                                                               | 0     | 1000 | 2  | Plant Polysaccharide Degradation | PMID:3968032                                                            | Oligogalacturonate lyase is not annotated in the B. thetaiotaomicron genome. Is assumed to also be carried out by pectate lyase to allow complete degradation of pectin. | 4.2.2.6   |

| SEED Rxn ID | BIGG Rxn ID | Function                                                             | Formula                                                   | Rev | GA      | LB    | UB   | CS | Subsystem                                  | Reference    | Notes                                                                                                                                                                                              | EC Number |
|-------------|-------------|----------------------------------------------------------------------|-----------------------------------------------------------|-----|---------|-------|------|----|--------------------------------------------|--------------|----------------------------------------------------------------------------------------------------------------------------------------------------------------------------------------------------|-----------|
| rxn03445    | OHPBAT      | O-Phospho-4-hydroxy-L-threonine:2-oxoglutarate aminotransferase      | glu-L[c] + ohpb[c] <=> akg[c] + phthr[c]                  | 1   | BT_1153 | -1000 | 1000 | 2  | Cofactor and Prosthetic Group Biosynthesis |              |                                                                                                                                                                                                    | 2.6.1.52  |
| rxn03395    | OHPHM       | 2-octaprenyl-6-hydroxyphenol methylase                               | amet[c] + 2ohph[c] => h[c] + ahcys[c] + 2omph[c]          | 0   | BT_3209 | 0     | 1000 | 2  | Cofactor and Prosthetic Group Biosynthesis | PMID: 893348 | It is not clear whether only menaquinone or mq and ubiquinone are synthesized. PMID: 893348 states that only menaquinone is present, however ubiquinone-using enzymes are annotated in the genome. |           |
| rxn01207    | OIVD1r      | 2-oxoisovalerate dehydrogenase (acylating; 4-methyl-2-oxopentaoate)  | coa[c] + nad[c] + 4mop[c] <=> co2[c] + nadh[c] + ivcoa[c] | 1   |         | -1000 | 1000 | 1  | Valine, Leucine, and Isoleucine Metabolism |              | Added by Model SEED during auto-completion step in pipeline. Required for lipid metabolism, assumed to be correctly included.                                                                      | 1.2.1.25  |
|             | OIVD2       | 2-oxoisovalerate dehydrogenase (acylating; 3-methyl-2-oxobutanoate)  | coa[c] + nad[c] + 3mob[c] => co2[c] + nadh[c] + ibcoa[c]  | 0   |         | 0     | 1000 | 1  | Valine, Leucine, and Isoleucine Metabolism |              | Manual_Gapfilling based on reactions OIVD1r and OIVD3 added by Model SEED. Required for lipid metabolism.                                                                                          | 1.2.1.25  |
| rxn02269    | OIVD3       | 2-oxoisovalerate dehydrogenase (acylating; 3-methyl-2-oxopentanoate) | coa[c] + nad[c] + 3mop[c] => 2mbcoa[c] + co2[c] + nadh[c] | 0   |         | 0     | 1000 | 1  | Valine, Leucine, and Isoleucine Metabolism |              | Reversible reaction in Model SEED. Added by Model SEED during auto-completion step in pipeline. Required for lipid metabolism, assumed to be correctly included.                                   | 1.2.1.25  |

| SEED Rxn ID | BIGG Rxn ID  | Function                                              | Formula                                                                 | Rev | GA                                                                       | LB    | UB   | CS | Subsystem                                  | Reference                    | Notes                                                                                                                                                                                                                                                                                    | EC Number |
|-------------|--------------|-------------------------------------------------------|-------------------------------------------------------------------------|-----|--------------------------------------------------------------------------|-------|------|----|--------------------------------------------|------------------------------|------------------------------------------------------------------------------------------------------------------------------------------------------------------------------------------------------------------------------------------------------------------------------------------|-----------|
|             | OLIGOFRUASEe | Oligofructose degradation by extracellular fructanase | 4 h2o[e] + oligofru4[e] => 4 fru[e]                                     | 0   | (BT_1759 or BT_3082)                                                     | 0     | 1000 | 4  | Plant Polysaccharide Degradation           | PMID:16461642, PMID:20603004 | B. thetaiotaomicron grows on the prebiotic oligofructose. Degradation is carried out by exo-acting periplasmatic fructosidases (extracellular for modeling purposes).                                                                                                                    |           |
| rxn01208    | OMCDC        | 2-Oxo-4-methyl-3-carboxypentanoate decarboxylation    | h[c] + 3c4mop[c] => co2[c] + 4mop[c]                                    | 0   |                                                                          | 0     | 1000 | 1  | Valine, Leucine, and Isoleucine Metabolism |                              |                                                                                                                                                                                                                                                                                          |           |
| rxn00710    | OMPDC        | orotidine-5'-phosphate decarboxylase                  | h[c] + orot5p[c] => co2[c] + ump[c]                                     | 0   | BT_4209                                                                  | 0     | 1000 | 2  | Purine and Pyrimidine Biosynthesis         |                              |                                                                                                                                                                                                                                                                                          | 4.1.1.23  |
| rxn05939    | OOR2r        | 2-oxoglutarate synthase (rev)                         | co2[c] + fdxrd[c] + succoa[c] <=> h[c] + akc[c] + coa[c] + fdxox[c]     | 1   | ((BT_0329 and BT_0330 and BT_0331 and BT_0333) or (BT_2836 and BT_2837)) | -1000 | 1000 | 4  | TCA Cycle                                  | PMID: 533772, PMID:11880608  | Demonstrated for several Bacteroides species. Neccessary for heme-dependent 2-oxoglutarate synthesis from oxaloacetate.                                                                                                                                                                  | 1.2.7.3   |
|             | OORr         | 2-oxoglutarate synthase (reversible)                  | akc[c] + coa[c] + 2 fdxox[c] <=> h[c] + co2[c] + succoa[c] + 2 fdred[c] | 1   | ((BT_0329 and BT_0330 and BT_0331 and BT_0333) or (BT_2836 and BT_2837)) | -1000 | 1000 | 4  | TCA Cycle                                  | PMID: 533772, PMID:11880608  | Demonstrated for several Bacteroides species. Neccessary for heme-dependent 2-oxoglutarate synthesis from oxaloacetate. OORr is an additional reaction catalyzed by 2-oxoglutarate synthase apart from OOR2r. Necessary to allow IOR2 to run. Not sure which form of ferredoxin is used. | 1.2.7.3   |
|             | ORNabc       | ornithine transport via ABC system                    | h2o[c] + atp[c] + orn[e] => h[c] + pi[c] + adp[c] + orn[c]              | 0   | BT_4049                                                                  | 0     | 1000 | 2  | Transport, Extracellular                   |                              | Annotation from NCBI Gene (last updated 01.01.11)                                                                                                                                                                                                                                        |           |

| SEED Rxn ID | BIGG Rxn ID | Function                                        | Formula                                                             | Rev | GA                   | LB    | UB   | CS | Subsystem                                          | Reference                    | Notes                                                                                                                                                                              | EC Number |
|-------------|-------------|-------------------------------------------------|---------------------------------------------------------------------|-----|----------------------|-------|------|----|----------------------------------------------------|------------------------------|------------------------------------------------------------------------------------------------------------------------------------------------------------------------------------|-----------|
| rxn00467    | ORNTA       | ornithine transaminase                          | akg[c] + orn[c] => glu-L[c] + glu5sa[c]                             | 0   | BT_3758              | 0     | 1000 | 2  | Arginine and Proline Metabolism                    | PMID:238949                  | Acetylornithine transaminase catalyzes the transamination of N-2-acetyl-L-ornithine (ACOTA) as well as of L-ornithine (this reaction) with 2-oxoglutarate.                         | 2.6.1.13  |
| rxn01362    | ORPT        | orotate phosphoribosyltransferase               | ppi[c] + orot5p[c] <=> prpp[c] + orot[c]                            | 1   | BT_3731              | -1000 | 1000 | 2  | Purine and Pyrimidine Biosynthesis                 |                              | Irreversible reaction in Model SEED                                                                                                                                                | 2.4.2.10  |
| rxn00503    | P5CD        | 1-pyrroline-5-carboxylate dehydrogenase         | 2 h2o[c] + nad[c] + 1pyr5c[c] => h[c] + glu-L[c] + nadh[c]          | 0   | BT_3115              | 0     | 1000 | 2  | Arginine and Proline Metabolism                    | PMID: 18369526               | Reversible reaction in Model SEED                                                                                                                                                  | 1.5.1.12  |
| rxn00931    | P5CRyr      | L-ProlineNADP+ 5-oxidoreductase                 | nadp[c] + pro-L[c] <=> 2 h[c] + nadph[c] + 1pyr5c[c]                | 1   | (BT_1902 or BT_3757) | -1000 | 1000 | 2  | Arginine and Proline Metabolism                    |                              |                                                                                                                                                                                    | 1.5.1.2   |
| rxn01257    | PABB        | Chorismate L-glutamine aminotransferase         | nh4[c] + chor[c] => h2o[c] + 4adcho[c]                              | 0   | (BT_0531 or BT_0767) | 0     | 1000 | 2  | Folate Metabolism                                  |                              | Reversible reaction in Model SEED                                                                                                                                                  | 2.6.1.85  |
|             | PACCOALr    | phenylacetate-CoA ligase                        | coa[c] + atp[c] + pac[c] <=> amp[c] + ppi[c] + phaccoa[c]           | 1   | (BT_0428 or BT_0571) | -1000 | 1000 | 3  | Tyrosine, Tryptophan, and Phenylalanine Metabolism | PMID:18396344, PMID:16887608 | B. thetaiotaomicron produces phenylacetate as a minor fermentation product (PMID:18396344). Phenylacetate is also formed in the gut from aromatic acid metabolism (PMID:16887608). | 6.2.1.30  |
|             | PACt2r      | phenylacetate transport in via proton symporter | h[e] + pac[e] <=> h[c] + pac[c]                                     | 1   |                      | -1000 | 1000 | 2  | Transport, Extracellular                           | PMID:18396344                | B. thetaiotaomicron produces phenylacetate as a minor fermentation product during growth on carbohydrates.                                                                         |           |
| rxn01791    | PANTS       | pantothenate synthase                           | atp[c] + ala-B[c] + pant-R[c] => h[c] + amp[c] + ppi[c] + pnto-R[c] | 0   | BT_4308              | 0     | 1000 | 3  | Cofactor and Prosthetic Group Biosynthesis         | PMID:4853401                 | Annotation from KEGG Pathway. B. thetaiotaomicron does not require pantothenate.                                                                                                   | 6.3.2.1   |

| SEED Rxn ID | BIGG Rxn ID | Function                                                                     | Formula                                                                                | Rev | GA                              | LB    | UB   | CS | Subsystem                                  | Reference | Notes                                                  | EC Number |
|-------------|-------------|------------------------------------------------------------------------------|----------------------------------------------------------------------------------------|-----|---------------------------------|-------|------|----|--------------------------------------------|-----------|--------------------------------------------------------|-----------|
| rxn03903    | PAPPT2      | phospho-N-acetylmuramoyl-pentapeptide-transferase (gamma-glutamate)          | udcpp[c] + uGgla[c] => ump[c] + uaGgla[c]                                              | 0   | BT_3451                         | 0     | 1000 | 2  | Cell Envelope Biosynthesis                 |           | Reversible reaction in Model SEED                      | 2.7.8.13  |
| rxn03904    | PAPPT3      | phospho-N-acetylmuramoyl-pentapeptide-transferase (meso-2,6-diaminopimelate) | udcpp[c] + ugmda[c] => ump[c] + uagmda[c]                                              | 0   | BT_3451                         | 0     | 1000 | 2  | Cell Envelope Biosynthesis                 |           | Reversible reaction in Model SEED                      | 2.7.8.13  |
| rxn10344    | PBT         | Lead (Pb+2) ABC transporter                                                  | h2o[c] + atp[c] + pb[c] => h[c] + pi[c] + adp[c] + pb[e]                               | 0   | BT_1091                         | 0     | 1000 | 2  | Transport, Extracellular                   |           | Added manually to BIGG database based on SEED database |           |
| rxn00871    | PBUTT       | Phosphate butyryltransferase                                                 | pi[c] + btcoa[c] <=> coa[c] + butpi[c]                                                 | 1   | BT_2551                         | -1000 | 1000 | 2  | Butanoate Metabolism                       |           |                                                        | 2.3.1.19  |
| rxn00250    | PC          | pyruvate carboxylase                                                         | pyr[c] + atp[c] + hco3[c] => h[c] + pi[c] + adp[c] + oaa[c]                            | 0   | BT_1196                         | 0     | 1000 | 2  | TCA Cycle                                  |           |                                                        | 6.4.1.1   |
|             | PDHa        | pyruvate dehydrogenase (lipoamide)                                           | h[c] + pyr[c] + lpam[c] => co2[c] + adhlam[c]                                          | 0   | BT_0311                         | 0     | 1000 | 2  | Glycolysis/Gluconeogenesis                 |           |                                                        |           |
| rxn01871    | PDHbr       | pyruvate dehydrogenase (dihydrolipoamide) reversible                         | coa[c] + adhlam[c] <=> acccoa[c] + dhlam[c]                                            | 1   | BT_0311                         | -1000 | 1000 | 2  | Glycolysis/Gluconeogenesis                 |           |                                                        | 2.3.1.12  |
| rxn01241    | PDHcr       | Pyruvate dehydrogenase (dihydrolipoamide dehydrogenase) reversible           | nad[c] + dhlam[c] <=> h[c] + nadh[c] + lpam[c]                                         | 1   | (BT_0309 or BT_1542 or BT_3186) | -1000 | 1000 | 2  | Glycolysis/Gluconeogenesis                 |           |                                                        | 2.3.1.12  |
| rxn00209    | PDX5POi     | pyridoxine 5'-phosphate oxidase                                              | o2[c] + pdx5p[c] => h2o2[c] + pydx5p[c]                                                | 0   | BT_1577                         | 0     | 1000 | 2  | Cofactor and Prosthetic Group Biosynthesis |           |                                                        | 1.4.3.5   |
|             | PDX5PS      | Pyridoxine 5'-phosphate synthase                                             | phthr[c] + nad[c] + dxyl5p[c] => 2 h2o[c] + h[c] + co2[c] + pi[c] + nadh[c] + pdx5p[c] | 0   | (BT_3918 and BT_4374)           | 0     | 1000 | 2  | Cofactor and Prosthetic Group Biosynthesis |           | BIGG reaction PDX5PS replaces 3 SEED reactions.        | 2.6.99.2  |

| SEED Rxn ID | BIGG Rxn ID   | Function                                                          | Formula                                                                                          | Rev | GA                                                                                                                                                                                                                                                                                                                                                                                                                                              | LB    | UB   | CS | Subsystem                        | Reference                                                                            | Notes                                                                                                                                                                                                                                                                                   | EC Number |
|-------------|---------------|-------------------------------------------------------------------|--------------------------------------------------------------------------------------------------|-----|-------------------------------------------------------------------------------------------------------------------------------------------------------------------------------------------------------------------------------------------------------------------------------------------------------------------------------------------------------------------------------------------------------------------------------------------------|-------|------|----|----------------------------------|--------------------------------------------------------------------------------------|-----------------------------------------------------------------------------------------------------------------------------------------------------------------------------------------------------------------------------------------------------------------------------------------|-----------|
|             | PE_CER1_BTt   | Ceramide phosphoethanolamine (B.thetaiotaomicron specific) export | pe_cer1_bt[c]<br><=><br>pe_cer1_bt[e]                                                            | 1   |                                                                                                                                                                                                                                                                                                                                                                                                                                                 | -1000 | 1000 | 2  | Sphingolipid Metabolism          | PMID:16887518, PMID:20855611, Anaerobe (2001) 07, 103?112 doi:10.1006/anae.2001.0376 | Bacteroides species are well established to produce sphingolipids.                                                                                                                                                                                                                      |           |
|             | PECTICGALASEe | Pectic galactan (potato) degradation, extracellular               | 99 h2o[e] + pectical[e] => 2 ac[e] + 9 arab-L[e] + 78 gal[e] + 4 rmn[e] + 9 galur[e] + 2 meoh[e] | 0   | ((BT_0348 or BT_0360 or BT_0367 or BT_0368 or BT_0369) and (BT_4667 or BT_4668 or BT_4152) and (BT_4146 or BT_4149 or BT_4153 or BT_4155 or BT_4160 or BT_4170 or BT_4183 or BT_4115 or BT_4116 or BT_4119 or BT_4123) and (BT_4150 or BT_4173) and BT_4175 and (BT_4109 or BT_4110) and ((BT_0361 and BT_0362) or (BT_0363 and BT_0364) or (BT_4670 and BT_4671) or (BT_4164 and BT_4165) or (BT_4113 and BT_4114) or (BT_4121 and BT_4122)))) | 0     | 1000 | 4  | Plant Polysaccharide Degradation | PMID: 22205877                                                                       | B. thetaiotaomicron grows on pectic galactan. The genes included in the GPR are upregulated during growth. Enzymes/ proteins assumed to be involved: arabinosidase, galactosidase, galacturonisidase, rhamnogalactorunan esterase, rhamnogalacturonan lyase, pectinesterase, susC/ SusD |           |

| SEED Rxn ID | BIGG Rxn ID  | Function                                                                                              | Formula                                               | Rev | GA                                                                  | LB    | UB   | CS | Subsystem                                  | Reference                                                                            | Notes                                                                                                                                                                                                      | EC Number |
|-------------|--------------|-------------------------------------------------------------------------------------------------------|-------------------------------------------------------|-----|---------------------------------------------------------------------|-------|------|----|--------------------------------------------|--------------------------------------------------------------------------------------|------------------------------------------------------------------------------------------------------------------------------------------------------------------------------------------------------------|-----------|
|             | PECTIN_DEG2e | Pectin degradation by extracellular pectate lyase and pectinesterase, gut microbiota specific         | 390 h[e] + pect[e] => 195 meoh[e] + 195 unsdigalur[e] | 0   | ((BT_4115 or BT_4116) and BT_4110)                                  | 0     | 1000 | 4  | Plant Polysaccharide Degradation           | PMID:3968032                                                                         | Purified and characterized by enzyme assay in B. thetaiotaomicron. Genome annotation from NCBI Gene. Appears to be located in periplasm (extracellular for modeling purposes).                             |           |
|             | PECTIN_DEGe  | Pectin degradation by extracellular endopolygalacturonase and pectinesterase, gut microbiota specific | 390 h2o[e] + pect[e] => 390 galur[e] + 195 meoh[e]    | 0   | ((BT_1018 or BT_2378 or BT_4123 or BT_4155 or BT_4187) and BT_4110) | 0     | 1000 | 4  | Plant Polysaccharide Degradation           | PMID:3968032                                                                         | Purified and characterized by enzyme assay. Genome annotation from NCBI Gene. Appears to be located in periplasm (extracellular for modeling purposes).                                                    |           |
|             | PEPM         | phosphoenolpyruvate mutase                                                                            | pep[c] <=> 3pop[c]                                    | 1   | BT_1720                                                             | -1000 | 1000 | 3  | Capsular Polysaccharide Biosynthesis       | PMID:12904299                                                                        | PEPM, 3OPDC and 2AMEPHPAT form the biosynthetic pathway of 2-aminoethylphosphonate, a component of the capsular polysaccharide complex of Bacteroides fragilis, and most likely other Bacteroides species. | 5.4.2.9   |
|             | PEPT160      | ethanolamine phosphotransferase (n-C16:0)                                                             | h[c] + pe160[c] + cmp[c] => cdpea[c] + 12dgr160[c]    | 0   |                                                                     | 0     | 1000 | 2  | Sphingolipid Metabolism                    | PMID:16887518, PMID:20855611, Anaerobe (2001) 07, 103?112 doi:10.1006/anae.2001.0376 | Reaction required for sphingolipid synthesis. The pathway mechanism may be different.                                                                                                                      |           |
| rxn02939    | PERD         | Erythronate 4-phosphate (4per) dehydrogenase                                                          | nad[c] + 4per[c] <=> h[c] + nadh[c] + ohpb[c]         | 1   | BT_3361                                                             | -1000 | 1000 | 2  | Cofactor and Prosthetic Group Biosynthesis |                                                                                      |                                                                                                                                                                                                            | 1.1.1.290 |

| SEED Rxn ID | BIGG Rxn ID | Function                                                                                           | Formula                                                      | Rev | GA                                                                                                                         | LB    | UB   | CS | Subsystem                                          | Reference                                          | Notes                                                                                                                                                  | EC Number |
|-------------|-------------|----------------------------------------------------------------------------------------------------|--------------------------------------------------------------|-----|----------------------------------------------------------------------------------------------------------------------------|-------|------|----|----------------------------------------------------|----------------------------------------------------|--------------------------------------------------------------------------------------------------------------------------------------------------------|-----------|
| rxn00545    | PFK         | phosphofructokinase                                                                                | atp[c] + f6p[c]<br>=> h[c] + adp[c]<br>+ fdp[c]              | 0   | (BT_1102 or<br>BT_2062 or<br>BT_3356)                                                                                      | 0     | 1000 | 4  | Glycolysis/Glu<br>coneogenesis                     | PMID:73363,<br>PMID: 6122675                       | Reversible reaction in<br>Model SEED. ATP-<br>and pyrophosphate-<br>linked<br>phosphofructokinase<br>activity was shown<br>Bacteroides species.        | 2.7.1.11  |
| rxn00551    | PFK(ppi)    | Pyrophosphate--<br>fructose 6-phosphate 1-<br>phosphotransferase,<br>beta subunit (EC<br>2.7.1.90) | ppi[c] + f6p[c]<br>=> h[c] + pi[c] +<br>fdp[c]               | 0   | BT_0307                                                                                                                    | 0     | 1000 | 2  | Glycolysis/Glu<br>coneogenesis                     | PMID: 7240086,<br>PMID: 6122675                    | Reversible reaction in<br>Model SEED. ATP-<br>and pyrophosphate-<br>linked<br>phosphofructokinase<br>activity was shown<br>Bacteroides species.        | 2.7.1.90  |
| rxn02314    | PFK_2       | Phosphofructokinase                                                                                | atp[c] + tag6p-<br>D[c] => h[c] +<br>adp[c] + tagdp-<br>D[c] | 0   | (BT_1102 or<br>BT_2062 or<br>BT_3356)                                                                                      | 0     | 1000 | 4  | Alternate<br>Carbon<br>Metabolism                  | PMID:73363,<br>PMID: 6122675                       | Reversible reaction in<br>Model SEED. ATP-<br>and pyrophosphate-<br>linked<br>phosphofructokinase<br>activity was shown<br>Bacteroides species.        | 2.7.1.11  |
| rxn01343    | PFK_3       | ATPSedoheptulose 7-<br>phosphate 1-<br>phosphotransferase                                          | atp[c] + s7p[c]<br>=> h[c] + adp[c]<br>+ s17bp[c]            | 0   | (BT_1102 or<br>BT_2062 or<br>BT_3356)                                                                                      | 0     | 1000 | 4  | Pentose<br>Phosphate<br>Pathway                    | PMID:73363,<br>PMID: 6122675                       | ATP- and<br>pyrophosphate-linked<br>phosphofructokinase<br>activity was shown<br>Bacteroides species.                                                  | 2.7.1.11  |
| rxn00157    | PFL         | pyruvate formate lyase                                                                             | pyr[c] + coa[c]<br>=> accoa[c] +<br>for[c]                   | 0   | ((BT_1055<br>and BT_2955)<br>or (BT_4738<br>and BT_1055)<br>or (BT_2955<br>and BT_2956)<br>or (BT_4737<br>and<br>BT_4738)) | 0     | 1000 | 3  | Central<br>Metabolism                              | PMID: 8048843,<br>PMID: 17563350                   | Presence of enzyme<br>in Bacteroides<br>xylanolyticus<br>confirmed (PMID:<br>8048843), B.<br>thetaiotaomicron<br>produces formate<br>(PMID: 17563350). | 2.3.1.54  |
| rxn01485    | PGAMT       | phosphoglucosamine<br>mutase                                                                       | gam1p[c] <=><br>gam6p[c]                                     | 1   | BT_3950                                                                                                                    | -1000 | 1000 | 4  | Cell Envelope<br>Biosynthesis                      | PMID:18931137,<br>PMID:19460428,<br>PMID:20974832. | Reaction is needed<br>for LPS biosynthesis,<br>based on H. pylori<br>LPS biosynthesis<br>(BIGG database).<br>Annotation from The<br>SEED.              | 5.4.2.10  |
| rxn01101    | PGCDr       | 3-Phospho-D-<br>glycerateNAD+ 2-<br>oxidoreductase                                                 | nad[c] + 3pg[c]<br><=> h[c] +<br>nadh[c] +<br>3php[c]        | 1   | (BT_1152 or<br>BT_1207)                                                                                                    | -1000 | 1000 | 2  | Glycine,<br>Serine, and<br>Threonine<br>Metabolism |                                                    |                                                                                                                                                        | 1.1.1.95  |

| SEED Rxn ID | BIGG Rxn ID | Function                                             | Formula                                                                            | Rev | GA                              | LB    | UB   | CS | Subsystem                      | Reference                                   | Notes                                                                            | EC Number |
|-------------|-------------|------------------------------------------------------|------------------------------------------------------------------------------------|-----|---------------------------------|-------|------|----|--------------------------------|---------------------------------------------|----------------------------------------------------------------------------------|-----------|
| rxn00558    | PGI         | glucose-6-phosphate isomerase                        | $\text{g6p[c]} \rightleftharpoons \text{f6p[c]}$                                   | 1   | BT_2124                         | -1000 | 1000 | 4  | Glycolysis/Gluconeogenesis     | PMID: 6804433                               | Measured by enzyme assay in B. thetaiotaomicron.                                 | 5.3.1.9   |
| rxn01100    | PGK         | phosphoglycerate kinase                              | $\text{atp[c]} + 3\text{pg[c]} \rightleftharpoons \text{adp[c]} + 13\text{dpg[c]}$ | 1   | BT_1672                         | -1000 | 1000 | 2  | Glycolysis/Gluconeogenesis     |                                             |                                                                                  | 2.7.2.3   |
| rxn01476    | PGL         | 6-phosphogluconolactonase                            | $\text{h2o[c]} + 6\text{pgl[c]} \Rightarrow \text{h[c]} + 6\text{pgc[c]}$          | 0   | BT_1220                         | 0     | 1000 | 2  | Pentose Phosphate Pathway      |                                             |                                                                                  | 3.1.1.31  |
| rxn00980    | PGLYCP      | Phosphoglycolate phosphatase                         | $\text{h2o[c]} + 2\text{pglyc[c]} \Rightarrow \text{pi[c]} + \text{glyclt[c]}$     | 0   | (BT_4184 or BT_4315)            | 0     | 1000 | 2  | Alternate Carbon Metabolism    |                                             |                                                                                  | 3.1.3.18  |
| rxn01106    | PGM         | phosphoglycerate mutase                              | $2\text{pg[c]} \rightleftharpoons 3\text{pg[c]}$                                   | 1   | (BT_1105 or BT_1660 or BT_3419) | -1000 | 1000 | 2  | Glycolysis/Gluconeogenesis     |                                             |                                                                                  | 5.4.2.1   |
| rxn00704    | PGMT        | phosphoglucomutase                                   | $\text{g1p[c]} \rightleftharpoons \text{g6p[c]}$                                   | 1   | (BT_1548 or BT_3950)            | -1000 | 1000 | 2  | Glycolysis/Gluconeogenesis     |                                             | SEED annotation curated manually based on NCBI Gene.                             | 5.4.2.2   |
| rxn01967    | PGMT2       | phosphoglucomutase                                   | $\text{g1p-B[c]} \rightleftharpoons \text{g6p-B[c]}$                               | 1   | BT_2127                         | -1000 | 1000 | 2  | Glycolysis/Gluconeogenesis     |                                             |                                                                                  | E5.4.2.2  |
| rxn09101    | PGPP120     | phosphatidylglycerol phosphate phosphatase (n-C14:0) | $\text{h2o[c]} + \text{pgp120[c]} \Rightarrow \text{pi[c]} + \text{pg120[c]}$      | 0   | BT_1525                         | 0     | 1000 | 3  | Glycerophospholipid Metabolism | PMID: 6102980, PMID: 7440508, PMID: 7204330 | The fatty acid composition of B. thetaiotaomicron was determined experimentally. | 3.1.3.27  |
| rxn09102    | PGPP140     | phosphatidylglycerol phosphate phosphatase (n-C14:0) | $\text{h2o[c]} + \text{pgp140[c]} \Rightarrow \text{pi[c]} + \text{pg140[c]}$      | 0   | BT_1525                         | 0     | 1000 | 3  | Glycerophospholipid Metabolism | PMID: 6102980, PMID: 7440508, PMID: 7204330 | The fatty acid composition of B. thetaiotaomicron was determined experimentally. | 3.1.3.27  |
| rxn09104    | PGPP160     | phosphatidylglycerol phosphate phosphatase (n-C16:0) | $\text{h2o[c]} + \text{pgp160[c]} \Rightarrow \text{pi[c]} + \text{pg160[c]}$      | 0   | BT_1525                         | 0     | 1000 | 3  | Glycerophospholipid Metabolism | PMID: 6102980, PMID: 7440508, PMID: 7204330 | The fatty acid composition of B. thetaiotaomicron was determined experimentally. | 3.1.3.27  |
| rxn09106    | PGPP180     | phosphatidylglycerol phosphate phosphatase (n-C18:0) | $\text{h2o[c]} + \text{pgp180[c]} \Rightarrow \text{pi[c]} + \text{pg180[c]}$      | 0   | BT_1525                         | 0     | 1000 | 3  | Glycerophospholipid Metabolism | PMID: 6102980, PMID: 7440508, PMID: 7204330 | The fatty acid composition of B. thetaiotaomicron was determined experimentally. | 3.1.3.27  |
| rxn09107    | PGPP181     | phosphatidylglycerol phosphate phosphatase (n-C18:1) | $\text{h2o[c]} + \text{pgp181[c]} \Rightarrow \text{pi[c]} + \text{pg181[c]}$      | 0   | BT_1525                         | 0     | 1000 | 3  | Glycerophospholipid Metabolism | PMID: 6102980, PMID: 7440508, PMID: 7204330 | The fatty acid composition of B. thetaiotaomicron was determined experimentally. | 3.1.3.27  |

| SEED Rxn ID | BIGG Rxn ID | Function                                                           | Formula                                  | Rev | GA      | LB | UB   | CS | Subsystem                      | Reference                                   | Notes                                                                                                                                                                                                                            | EC Number |
|-------------|-------------|--------------------------------------------------------------------|------------------------------------------|-----|---------|----|------|----|--------------------------------|---------------------------------------------|----------------------------------------------------------------------------------------------------------------------------------------------------------------------------------------------------------------------------------|-----------|
| rxn10269    | PGPPAI15    | anteisopentadecanoyl-Phosphatidylglycerophosphate phosphohydrolase | h2o[c] + pgpai15[c] => pi[c] + pgai15[c] | 0   | BT_1525 | 0  | 1000 | 3  | Glycerophospholipid Metabolism | PMID: 6102980, PMID: 7440508, PMID: 7204330 | Added manually to BIGG database based on reaction mechanism proposed by Model SEED. This reaction is involved in fatty acid biosynthesis. B. thetaiotaomicron is well known to synthesize iso- and anteiso-branched fatty acids. | 3.1.3.27  |
| rxn10266    | PGPPAI17    | anteisoheptadecanoyl-Phosphatidylglycerophosphate phosphohydrolase | h2o[c] + pgpai17[c] => pi[c] + pgai17[c] | 0   | BT_1525 | 0  | 1000 | 3  | Glycerophospholipid Metabolism | PMID: 6102980, PMID: 7440508, PMID: 7204330 | Added manually to BIGG database based on reaction mechanism proposed by Model SEED. This reaction is involved in fatty acid biosynthesis. B. thetaiotaomicron is well known to synthesize iso- and anteiso-branched fatty acids. | 3.1.3.27  |
| rxn10267    | PGPPI14     | isotetradecanoyl-Phosphatidylglycerophosphate phosphohydrolase     | h2o[c] + pgpi14[c] => pi[c] + pgi14[c]   | 0   | BT_1525 | 0  | 1000 | 3  | Glycerophospholipid Metabolism | PMID: 6102980, PMID: 7440508, PMID: 7204330 | Added manually to BIGG database based on reaction mechanism proposed by Model SEED. This reaction is involved in fatty acid biosynthesis. B. thetaiotaomicron is well known to synthesize iso- and anteiso-branched fatty acids. | 3.1.3.27  |

| SEED Rxn ID | BIGG Rxn ID | Function                                                       | Formula                                                | Rev | GA                   | LB | UB   | CS | Subsystem                      | Reference                                   | Notes                                                                                                                                                                                                                            | EC Number |
|-------------|-------------|----------------------------------------------------------------|--------------------------------------------------------|-----|----------------------|----|------|----|--------------------------------|---------------------------------------------|----------------------------------------------------------------------------------------------------------------------------------------------------------------------------------------------------------------------------------|-----------|
| rxn10268    | PGPPI15     | isopentadecanoyl-Phosphatidylglycerophosphate phosphohydrolase | h2o[c] + pgpi15[c] => pi[c] + pgi15[c]                 | 0   | BT_1525              | 0  | 1000 | 3  | Glycerophospholipid Metabolism | PMID: 6102980, PMID: 7440508, PMID: 7204330 | Added manually to BIGG database based on reaction mechanism proposed by Model SEED. This reaction is involved in fatty acid biosynthesis. B. thetaiotaomicron is well known to synthesize iso- and anteiso-branched fatty acids. | 3.1.3.27  |
| rxn10270    | PGPPI16     | isohexadecanoyl-Phosphatidylglycerophosphate phosphohydrolase  | h2o[c] + pgpi16[c] => pi[c] + pgi16[c]                 | 0   | BT_1525              | 0  | 1000 | 3  | Glycerophospholipid Metabolism | PMID: 6102980, PMID: 7440508, PMID: 7204330 | Added manually to BIGG database based on reaction mechanism proposed by Model SEED. This reaction is involved in fatty acid biosynthesis. B. thetaiotaomicron is well known to synthesize iso- and anteiso-branched fatty acids. | 3.1.3.27  |
| rxn10265    | PGPPI17     | isoheptadecanoyl-Phosphatidylglycerophosphate phosphohydrolase | h2o[c] + pgpi17[c] => pi[c] + pgi17[c]                 | 0   | BT_1525              | 0  | 1000 | 3  | Glycerophospholipid Metabolism | PMID: 6102980, PMID: 7440508, PMID: 7204330 | Added manually to BIGG database based on reaction mechanism proposed by Model SEED. This reaction is involved in fatty acid biosynthesis. B. thetaiotaomicron is well known to synthesize iso- and anteiso-branched fatty acids. | 3.1.3.27  |
| rxn09108    | PGSA120     | Phosphatidylglycerol synthase (n-C12:0)                        | cdpdddecg[c] + glylc3p[c] => h[c] + cmp[c] + pgp120[c] | 0   | (BT_1523 or BT_4464) | 0  | 1000 | 3  | Glycerophospholipid Metabolism | PMID: 6102980, PMID: 7440508, PMID: 7204330 | The fatty acid composition of B. thetaiotaomicron was determined experimentally.                                                                                                                                                 | 2.7.8.5   |

| SEED Rxn ID | BIGG Rxn ID | Function                                                                                | Formula                                                  | Rev | GA                   | LB | UB   | CS | Subsystem                      | Reference                                   | Notes                                                                                                                                                                                                                            | EC Number |
|-------------|-------------|-----------------------------------------------------------------------------------------|----------------------------------------------------------|-----|----------------------|----|------|----|--------------------------------|---------------------------------------------|----------------------------------------------------------------------------------------------------------------------------------------------------------------------------------------------------------------------------------|-----------|
| rxn09109    | PGSA140     | Phosphatidylglycerol synthase (n-C14:0)                                                 | cdpdtdecg[c] + gly3p[c] => h[c] + cmp[c] + pgp140[c]     | 0   | (BT_1523 or BT_4464) | 0  | 1000 | 3  | Glycerophospholipid Metabolism | PMID: 6102980, PMID: 7440508, PMID: 7204330 | The fatty acid composition of B. thetaiotaomicron was determined experimentally.                                                                                                                                                 | 2.7.8.5   |
| rxn09111    | PGSA160     | Phosphatidylglycerol synthase (n-C16:0)                                                 | cdpdhdecg[c] + gly3p[c] => h[c] + cmp[c] + pgp160[c]     | 0   | (BT_1523 or BT_4464) | 0  | 1000 | 3  | Glycerophospholipid Metabolism | PMID: 6102980, PMID: 7440508, PMID: 7204330 | The fatty acid composition of B. thetaiotaomicron was determined experimentally.                                                                                                                                                 | 2.7.8.5   |
| rxn09113    | PGSA180     | Phosphatidylglycerol synthase (n-C18:0)                                                 | cdpdodecg[c] + gly3p[c] => h[c] + cmp[c] + pgp180[c]     | 0   | (BT_1523 or BT_4464) | 0  | 1000 | 3  | Glycerophospholipid Metabolism | PMID: 6102980, PMID: 7440508, PMID: 7204330 | The fatty acid composition of B. thetaiotaomicron was determined experimentally.                                                                                                                                                 | 2.7.8.5   |
| rxn09114    | PGSA181     | Phosphatidylglycerol synthase (n-C18:1)                                                 | cdpdodec11eg[c] + gly3p[c] => h[c] + cmp[c] + pgp181[c]  | 0   | (BT_1523 or BT_4464) | 0  | 1000 | 3  | Glycerophospholipid Metabolism | PMID: 6102980, PMID: 7440508, PMID: 7204330 | The fatty acid composition of B. thetaiotaomicron was determined experimentally.                                                                                                                                                 | 2.7.8.5   |
| rxn10263    | PGSAAI15    | anteisopentadecanoyl-CDPdiacylglycerolsn-glycerol-3-phosphate 3-phosphatidyltransferase | cdpdaipdecg[c] + gly3p[c] => h[c] + cmp[c] + pgpai15[c]  | 0   | (BT_1523 or BT_4464) | 0  | 1000 | 3  | Glycerophospholipid Metabolism | PMID: 6102980, PMID: 7440508, PMID: 7204330 | Added manually to BIGG database based on reaction mechanism proposed by Model SEED. This reaction is involved in fatty acid biosynthesis. B. thetaiotaomicron is well known to synthesize iso- and anteiso-branched fatty acids. | 2.7.8.5   |
| rxn10260    | PGSAAI17    | anteisoheptadecanoyl-CDPdiacylglycerolsn-glycerol-3-phosphate 3-phosphatidyltransferase | cdpdaihpdecg[c] + gly3p[c] => h[c] + cmp[c] + pgpai17[c] | 0   | (BT_1523 or BT_4464) | 0  | 1000 | 3  | Glycerophospholipid Metabolism | PMID: 6102980, PMID: 7440508, PMID: 7204330 | Added manually to BIGG database based on reaction mechanism proposed by Model SEED. This reaction is involved in fatty acid biosynthesis. B. thetaiotaomicron is well known to synthesize iso- and anteiso-branched fatty acids. | 2.7.8.5   |

| SEED Rxn ID | BIGG Rxn ID | Function                                                                            | Formula                                                | Rev | GA                   | LB | UB   | CS | Subsystem                      | Reference                                   | Notes                                                                                                                                                                                                                            | EC Number |
|-------------|-------------|-------------------------------------------------------------------------------------|--------------------------------------------------------|-----|----------------------|----|------|----|--------------------------------|---------------------------------------------|----------------------------------------------------------------------------------------------------------------------------------------------------------------------------------------------------------------------------------|-----------|
| rxn10261    | PGSAI14     | isotetradecanoyl-CDPdiacylglycerolsn-glycerol-3-phosphate 3-phosphatidyltransferase | cdpditdecg[c] + glyc3p[c] => h[c] + cmp[c] + pgpi14[c] | 0   | (BT_1523 or BT_4464) | 0  | 1000 | 3  | Glycerophospholipid Metabolism | PMID: 6102980, PMID: 7440508, PMID: 7204330 | Added manually to BIGG database based on reaction mechanism proposed by Model SEED. This reaction is involved in fatty acid biosynthesis. B. thetaiotaomicron is well known to synthesize iso- and anteiso-branched fatty acids. | 2.7.8.5   |
| rxn10262    | PGSAI15     | isopentadecanoyl-CDPdiacylglycerolsn-glycerol-3-phosphate 3-phosphatidyltransferase | cdpdipdecg[c] + glyc3p[c] => h[c] + cmp[c] + pgpi15[c] | 0   | (BT_1523 or BT_4464) | 0  | 1000 | 3  | Glycerophospholipid Metabolism | PMID: 6102980, PMID: 7440508, PMID: 7204330 | Added manually to BIGG database based on reaction mechanism proposed by Model SEED. This reaction is involved in fatty acid biosynthesis. B. thetaiotaomicron is well known to synthesize iso- and anteiso-branched fatty acids. | 2.7.8.5   |
| rxn10264    | PGSAI16     | isohexadecanoyl-CDPdiacylglycerolsn-glycerol-3-phosphate 3-phosphatidyltransferase  | cdpdihdecg[c] + glyc3p[c] => h[c] + cmp[c] + pgpi16[c] | 0   | (BT_1523 or BT_4464) | 0  | 1000 | 3  | Glycerophospholipid Metabolism | PMID: 6102980, PMID: 7440508, PMID: 7204330 | Added manually to BIGG database based on reaction mechanism proposed by Model SEED. This reaction is involved in fatty acid biosynthesis. B. thetaiotaomicron is well known to synthesize iso- and anteiso-branched fatty acids. | 2.7.8.5   |

| SEED Rxn ID | BIGG Rxn ID | Function                                                                                          | Formula                                                 | Rev | GA                              | LB    | UB   | CS | Subsystem                                          | Reference                                                                                                                | Notes                                                                                                                                                                                                                            | EC Number |
|-------------|-------------|---------------------------------------------------------------------------------------------------|---------------------------------------------------------|-----|---------------------------------|-------|------|----|----------------------------------------------------|--------------------------------------------------------------------------------------------------------------------------|----------------------------------------------------------------------------------------------------------------------------------------------------------------------------------------------------------------------------------|-----------|
| rxn10259    | PGSAI17     | isoheptadecanoyl-CDPdiacylglycerolsn-glycerol-3-phosphate 3-phosphatidyltransferase               | cdpdihpdecg[c] + glyc3p[c] => h[c] + cmp[c] + pgpi17[c] | 0   | (BT_1523 or BT_4464)            | 0     | 1000 | 3  | Glycerophospholipid Metabolism                     | PMID: 6102980, PMID: 7440508, PMID: 7204330                                                                              | Added manually to BIGG database based on reaction mechanism proposed by Model SEED. This reaction is involved in fatty acid biosynthesis. B. thetaiotaomicron is well known to synthesize iso- and anteiso-branched fatty acids. | 2.7.8.5   |
|             | PHCHGS      | L-1-Pyrroline-3-hydroxy-5-carboxylate spontaneous conversion to L-4-Hydroxyglutamate semialdehyde | h2o[c] + h[c] + 1p3h5c[c] <=> 4hglusa[c]                | 1   |                                 | -1000 | 1000 | 1  | Arginine and Proline Metabolism                    |                                                                                                                          | BIGG database suggests that this reaction occurs spontaneously.                                                                                                                                                                  |           |
|             | PHEARG1c    | Hydrolysis of L-phenylalanyl-L-arginine                                                           | h2o[c] + phearg[c] <=> arg-L[c] + phe-L[c]              | 1   | BT_1846                         | -1000 | 1000 | 4  | Peptide Degradation                                | PMID: 22628297                                                                                                           | B. thetaiotaomicron peptidase M49 was characterized and shown to hydrolyze Arg-Arg and Phe-Arg specifically.                                                                                                                     |           |
|             | PHEARGt     | L-phenylalanyl-L-arginine transport via proton symport                                            | h[e] + phearg[e] <=> h[c] + phearg[c]                   | 1   | (BT_0580 or BT_4385 or BT_1086) | -1000 | 1000 | 4  | Transport, Extracellular                           | PMID: 22628297                                                                                                           | B. thetaiotaomicron peptidase M49 was characterized and shown to hydrolyze Arg-Arg and Phe-Arg specifically.                                                                                                                     |           |
| rxn05306    | PHET2r      | L-phenylalanine reversible transport via proton symport                                           | h[e] + phe-L[e] <=> h[c] + phe-L[c]                     | 1   |                                 | -1000 | 1000 | 1  | Transport, Extracellular                           | Dworkin, M. and S. Falkow (2006). The prokaryotes : a handbook on the biology of bacteria. New York ; [London], Springer | B. thetaiotaomicron is weakly proteolytic, so a transport reaction for all amino acids is assumed to be present.                                                                                                                 |           |
| rxn00493    | PHETA1      | phenylalanine transaminase                                                                        | akg[c] + phe-L[c] <=> glu-L[c] + phpyr[c]               | 1   | (BT_0202 or BT_3935)            | -1000 | 1000 | 2  | Tyrosine, Tryptophan, and Phenylalanine Metabolism |                                                                                                                          |                                                                                                                                                                                                                                  | 2.6.1.58  |

| SEED Rxn ID | BIGG Rxn ID | Function                                                | Formula                                                                                                                                            | Rev | GA                                                                                               | LB    | UB   | CS | Subsystem                                  | Reference                   | Notes                                                                                                                                                                                                               | EC Number |
|-------------|-------------|---------------------------------------------------------|----------------------------------------------------------------------------------------------------------------------------------------------------|-----|--------------------------------------------------------------------------------------------------|-------|------|----|--------------------------------------------|-----------------------------|---------------------------------------------------------------------------------------------------------------------------------------------------------------------------------------------------------------------|-----------|
| rxn05145    | Plabc       | phosphate transport via ABC system                      | $\text{h2o}[c] + \text{atp}[c] + \text{pi}[e] \Rightarrow \text{h}[c] + 2 \text{pi}[c] + \text{adp}[c]$                                            | 0   | ((BT_1321 and BT_1322 and BT_1323 and BT_1324) or (BT_1321 and BT_1322 and BT_1323 and BT_0009)) | 0     | 1000 | 4  | Transport, Extracellular                   | PMID:4472783                | Reversible reaction in Model SEED. B. thetaiotaomicron requires inorganic phosphate for growth.                                                                                                                     |           |
| rxn05312    | Plt6        | Phosphate transport out via proton symport              | $\text{h}[c] + \text{pi}[c] \Rightarrow \text{h}[e] + \text{pi}[e]$                                                                                | 0   | BT_4637                                                                                          | 0     | 1000 | 2  | Transport, Extracellular                   |                             |                                                                                                                                                                                                                     |           |
| rxn05313    | Plt8i       | phosphate transport in via Na+ symporter, irreversible  | $1.5 \text{nal}[e] + \text{pi}[e] \Rightarrow \text{pi}[c] + 1.5 \text{nal}[c]$                                                                    | 0   | BT_2528                                                                                          | 0     | 1000 | 2  | Transport, Extracellular                   | PMID:4472783                | B. thetaiotaomicron requires inorganic phosphate.                                                                                                                                                                   |           |
| rxn05144    | PLPS        | Pyridoxine biosynthesis glutamine amidotransferase      | $\text{ru5p-D}[c] + \text{gln-L}[c] + \text{g3p}[c] \Rightarrow 3 \text{h2o}[c] + \text{h}[c] + \text{glu-L}[c] + \text{pi}[c] + \text{pydx5p}[c]$ | 0   |                                                                                                  | 0     | 1000 | 1  | Vitamin B6 Metabolism                      |                             | Reaction is reversible in SEED. Added by Model SEED during auto-completion step in pipeline.                                                                                                                        | 2.4.2.-   |
|             | PMAcPME     | Cleavage of ester from pimeloyl-ACP methyl ester (BioH) | $\text{h2o}[c] + \text{pmACpM}[c] \Rightarrow \text{h}[c] + \text{pmACP}[c] + \text{meoh}[c]$                                                      | 0   |                                                                                                  | 0     | 1000 | 2  | Biotin Metabolism                          | PMID:20693992, PMID:4853401 | Based on biotin synthesis described in PMID:20693992 for E. coli. Gene is not known, but the gap was filled to complete biotin synthesis pathway (biotin is not required by B. thetaiotaomicron, see PMID:4853401). |           |
| rxn01329    | PMANM       | phosphomannomutase                                      | $\text{man1p}[c] \rightleftharpoons \text{man6p}[c]$                                                                                               | 1   | (BT_3950 or BT_1548)                                                                             | -1000 | 1000 | 2  | Alternate Carbon Metabolism                |                             | Based on annotation from NCBI Gene (last updated 21.05.11)                                                                                                                                                          | 5.4.2.8   |
| rxn05039    | PMDPHT      | pyrimidine phosphatase                                  | $\text{h2o}[c] + 5\text{aprbu}[c] \Rightarrow \text{pi}[c] + 4\text{r5au}[c]$                                                                      | 0   |                                                                                                  | 0     | 1000 | 1  | Cofactor and Prosthetic Group Biosynthesis |                             | Added by Model SEED during auto-completion step in pipeline.                                                                                                                                                        | 3.1.3.-   |
| rxn03108    | PMPK        | phosphomethylpyrimidine kinase                          | $\text{atp}[c] + 4\text{ampm}[c] \Rightarrow \text{adp}[c] + 2\text{mahmp}[c]$                                                                     | 0   | BT_0790                                                                                          | 0     | 1000 | 2  | Cofactor and Prosthetic Group Biosynthesis |                             | Reversible reaction in Model SEED                                                                                                                                                                                   | 2.7.4.7   |

| SEED Rxn ID | BIGG Rxn ID | Function                                             | Formula                                                            | Rev | GA                   | LB    | UB   | CS | Subsystem                                  | Reference                                   | Notes                                                                                                                                                                                                                            | EC Number |
|-------------|-------------|------------------------------------------------------|--------------------------------------------------------------------|-----|----------------------|-------|------|----|--------------------------------------------|---------------------------------------------|----------------------------------------------------------------------------------------------------------------------------------------------------------------------------------------------------------------------------------|-----------|
| rxn05458    | PMTCOATA    | hexadecanoyl-ACP[acyl-carrier-protein] transferase   | coa[c] + palmACP[c] <=> ACP[c] + pmtcoa[c]                         | 1   | BT_0789              | -1000 | 1000 | 3  | Glycerophospholipid Metabolism             | PMID: 6102980, PMID: 7440508, PMID: 7204330 | Added manually to BIGG database based on reaction mechanism proposed by Model SEED. This reaction is involved in fatty acid biosynthesis. B. thetaiotaomicron is well known to synthesize iso- and anteiso-branched fatty acids. | 2.3.1.180 |
| rxn01646    | PNP         | purine-nucleoside phosphorylase                      | pi[c] + rnam[c] <=> h[c] + rlp[c] + ncarn[c]                       | 1   | (BT_1881 or BT_4554) | -1000 | 1000 | 2  | NAD Metabolism                             |                                             |                                                                                                                                                                                                                                  | 3.4.2.1   |
| rxn12510    | PNTK        | pantothenate kinase                                  | atp[c] + pnto-R[c] => h[c] + adp[c] + 4ppan[c]                     | 0   | BT_4366              | 0     | 1000 | 2  | Cofactor and Prosthetic Group Biosynthesis |                                             | Reversible reaction in Model SEED                                                                                                                                                                                                | 2.7.1.33  |
|             | PNTOt2      | Pantothenate reversible transport via proton symport | h[e] + pnto-R[e] <=> h[c] + pnto-R[c]                              | 1   |                      | -1000 | 1000 | 2  | Transport, Extracellular                   | PMID: 19748469                              | B. thetaiotaomicron mutants in pantothenate biosynthesis are not essential in vitro on tryptone-yeast extract-glucose medium, suggesting that B. thetaiotaomicron can uptake pantothenate from yeast extract.                    |           |
| rxn05938    | POR4        | Pyruvate-flavodoxin oxidoreductase (EC 1.2.7.-)      | co2[c] + accoa[c] + fdxrd[c] <=> h[c] + pyr[c] + coa[c] + fdxox[c] | 1   | BT_1747              | -1000 | 1000 | 4  | Central Metabolism                         | PMID: 11260473                              |                                                                                                                                                                                                                                  | 1.2.7.1   |

| SEED Rxn ID | BIGG Rxn ID | Function                                           | Formula                                                                                                                                            | Rev | GA                    | LB    | UB   | CS | Subsystem                                  | Reference                    | Notes                                                                                                                                                                                                                                                                                                                                          | EC Number        |
|-------------|-------------|----------------------------------------------------|----------------------------------------------------------------------------------------------------------------------------------------------------|-----|-----------------------|-------|------|----|--------------------------------------------|------------------------------|------------------------------------------------------------------------------------------------------------------------------------------------------------------------------------------------------------------------------------------------------------------------------------------------------------------------------------------------|------------------|
| rxn09167    | POX         | pyruvate oxidase                                   | $\text{h2o}[\text{c}] + \text{pyr}[\text{c}] + \text{q8}[\text{c}] \Rightarrow \text{co2}[\text{c}] + \text{ac}[\text{c}] + \text{q8h2}[\text{c}]$ | 0   | (BT_1820 and BT_1822) | 0     | 1000 | 4  | Central Metabolism                         | PMID: 19525515, PMID: 893348 | PMID: 19525515 demonstrates presence of this enzyme. It is unclear whether B. thetaiotaomicron uses ubiquinone, menaquinone or both. PMID: 893348 states that only menaquinone is present. Also, this enzyme is reported by KEGG not to accept menaquinone. However, ubiquinone-using enzymes are annotated in the B. thetaiotaomicron genome. | 1.2.2.2          |
|             | PPA_1       | inorganic diphosphatase (one proton translocation) | $\text{h2o}[\text{c}] + \text{ppi}[\text{c}] \Rightarrow 2 \text{ pi}[\text{c}] + \text{h}[\text{e}]$                                              | 0   | BT_3411               | 0     | 1000 | 2  | Central Metabolism                         | PMID:10523139                | Annotation based on NCBI Gene (last updated 28.05.11). Can cleave pyrophosphate to two phosphates; can generate a proton motive force and drive pyrophosphate synthesis when PMF is sufficient. General review in PMID:10523139.                                                                                                               | 3.6.1.1, T3.A.10 |
| rxn00985    | PPAKr       | Propionate kinase                                  | $\text{adp}[\text{c}] + \text{ppap}[\text{c}] \Leftrightarrow \text{atp}[\text{c}] + \text{ppa}[\text{c}]$                                         | 1   | BT_3693               | -1000 | 1000 | 3  | Alternate Carbon Metabolism                | PMID: 16349240               |                                                                                                                                                                                                                                                                                                                                                | 2.7.2.1          |
|             | PPAtr       | Propionate transport, diffusion                    | $\text{ppa}[\text{e}] \Leftrightarrow \text{ppa}[\text{c}]$                                                                                        | 1   |                       | -1000 | 1000 | 2  | Transport, Extracellular                   | PMID:19321416, PMID:12740060 | Bacteroides species are well established to produce short-chain fatty acids (SCFAs).                                                                                                                                                                                                                                                           |                  |
| rxn02341    | PPCDC       | phosphopantothenoylcy steine decarboxylase         | $\text{h}[\text{c}] + 4\text{ppcys}[\text{c}] \Rightarrow \text{co2}[\text{c}] + \text{pan4p}[\text{c}]$                                           | 0   | BT_1362               | 0     | 1000 | 2  | Cofactor and Prosthetic Group Biosynthesis |                              |                                                                                                                                                                                                                                                                                                                                                | 4.1.1.36         |

| SEED Rxn ID | BIGG Rxn ID | Function                                          | Formula                                                            | Rev | GA                   | LB    | UB   | CS | Subsystem                                          | Reference                  | Notes                                                                                                                              | EC Number |
|-------------|-------------|---------------------------------------------------|--------------------------------------------------------------------|-----|----------------------|-------|------|----|----------------------------------------------------|----------------------------|------------------------------------------------------------------------------------------------------------------------------------|-----------|
| rxn00247    | PPCKr       | phosphoenolpyruvate carboxykinase                 | atp[c] + oaa[c] <=> co2[c] + adp[c] + pep[c]                       | 1   | BT_2790              | -1000 | 1000 | 4  | TCA Cycle                                          | PMID:11260473, PMID:148460 | Literature suggests that this reaction runs in the direction of oxaloacetate. The reaction was made reversible due to uncertainty. | 4.1.1.49  |
| rxn00151    | PPDK        | Pyruvate phosphate dikinase                       | pyr[c] + pi[c] + atp[c] => h[c] + pep[c] + amp[c] + ppi[c]         | 0   | BT_0644              | 0     | 1000 | 2  | Glycolysis/Gluconeogenesis                         |                            | Reversible reaction in Model SEED                                                                                                  | 2.7.9.1   |
| rxn00242    | PPGPPDP     | guanosine-3',5'-bis(diphosphate) 3'-diphosphatase | h2o[c] + ppgpp[c] => ppi[c] + gdp[c]                               | 0   | BT_3998              | 0     | 1000 | 2  | Cofactor and Prosthetic Group Biosynthesis         |                            |                                                                                                                                    | 3.1.7.2   |
|             | PPK2        | polyphosphate kinase                              | atp[c] + ppi[c] => adp[c] + ppp[i][c]                              | 0   | (BT_0541 or BT_2019) | 0     | 1000 | 2  | Central Metabolism                                 |                            | Added based on annotation from NCBI Gene.                                                                                          | 2.7.4.1   |
| rxn09177    | PPNCL2      | phosphopantothenate-cysteine ligase               | cys-L[c] + ctp[c] + 4ppan[c] => h[c] + ppi[c] + cmp[c] + 4ppcys[c] | 0   | BT_1362              | 0     | 1000 | 2  | Cofactor and Prosthetic Group Biosynthesis         |                            |                                                                                                                                    | 6.3.2.5   |
| rxn12512    | PPNCL3      | phosphopantothenate-cysteine ligase               | atp[c] + cys-L[c] + 4ppan[c] => h[c] + amp[c] + ppi[c] + 4ppcys[c] | 0   | BT_1362              | 0     | 1000 | 2  | Cofactor and Prosthetic Group Biosynthesis         |                            |                                                                                                                                    | 6.3.2.5   |
| rxn01268    | PPND        | prephenate dehydrogenase                          | nad[c] + pphn[c] => co2[c] + nadh[c] + 34hpp[c]                    | 0   | BT_3933              | 0     | 1000 | 2  | Tyrosine, Tryptophan, and Phenylalanine Metabolism |                            |                                                                                                                                    | 1.3.1.12  |
| rxn01269    | PPND2       | PrephenateNADP+ oxidoreductase(decarboxylating)   | nadp[c] + pphn[c] => nadph[c] + co2[c] + 34hpp[c]                  | 0   | BT_3933              | 0     | 1000 | 2  | Tyrosine, Tryptophan, and Phenylalanine Metabolism |                            |                                                                                                                                    | 1.3.1.13  |
| rxn01000    | PPNDH       | prephenate dehydratase                            | h[c] + pphn[c] => h2o[c] + co2[c] + phpyr[c]                       | 0   | BT_3936              | 0     | 1000 | 2  | Tyrosine, Tryptophan, and Phenylalanine Metabolism |                            |                                                                                                                                    | 4.2.1.51  |

| SEED Rxn ID | BIGG Rxn ID | Function                                                | Formula                                                                             | Rev | GA                                         | LB    | UB   | CS | Subsystem                                  | Reference | Notes                                                                                                                                | EC Number |
|-------------|-------------|---------------------------------------------------------|-------------------------------------------------------------------------------------|-----|--------------------------------------------|-------|------|----|--------------------------------------------|-----------|--------------------------------------------------------------------------------------------------------------------------------------|-----------|
| rxn10199    | PPTGS       | Peptidoglycan subunit synthesis                         | uaagmda[c] => h[c] + peptido_EC[c] + udcdp[c]                                       | 0   | (BT_3453 or BT_0943 or BT_0162 or BT_2501) | 0     | 1000 | 2  | Cell Envelope Biosynthesis                 |           | Drawn from the E. coli iJR904 reconstruction for lack of better information.                                                         |           |
| rxn03892    | PPTT        | trans-pentaprenyltranstransferase                       | ipdp[c] + pendp[c] => ppi[c] + hexdp[c]                                             | 0   | (BT_3261 or BT_2058)                       | 0     | 1000 | 2  | Cofactor and Prosthetic Group Biosynthesis |           | Added manually to BIGG database based on SEED database                                                                               | 2.5.1.33  |
| rxn02895    | PRAGS       | phosphoribosylglycinamide synthetase                    | atp[c] + gly[c] + pram[c] => h[c] + pi[c] + adp[c] + gar[c]                         | 0   | BT_3253                                    | 0     | 1000 | 2  | Purine and Pyrimidine Biosynthesis         |           |                                                                                                                                      | 6.3.4.13  |
| rxn02508    | PRAI        | phosphoribosylanthranilate isomerase                    | pran[c] <=> 2cpr5p[c]                                                               | 1   | BT_0528                                    | -1000 | 1000 | 2  | Purine and Pyrimidine Biosynthesis         |           |                                                                                                                                      | 5.3.1.24  |
| rxn02937    | PRAIS       | phosphoribosylaminoimidazole synthase                   | atp[c] + fpram[c] => 2 h[c] + pi[c] + adp[c] + air[c]                               | 0   | BT_4211                                    | 0     | 1000 | 2  | Purine and Pyrimidine Biosynthesis         |           | Reversible reaction in Model SEED                                                                                                    | 6.3.3.1   |
| rxn02835    | PRAMPC      | phosphoribosyl-AMP cyclohydrolase                       | h2o[c] + prbamp[c] => prfp[c]                                                       | 0   | BT_1377                                    | 0     | 1000 | 2  | Histidine Metabolism                       |           | Reviewed bifunctional phosphoribosyl-AMP cyclohydrolase/phosphoribosyl-ATP pyrophosphatase (NCBI Gene). Reversible reaction in SEED. | 3.5.4.19  |
| rxn03147    | PRASCSi     | phosphoribosylaminoimidazolesuccinocarboxamide synthase | atp[c] + asp-L[c] + 5aizc[c] => h[c] + pi[c] + adp[c] + 25aics[c]                   | 0   | BT_4217                                    | 0     | 1000 | 2  | Purine and Pyrimidine Biosynthesis         |           |                                                                                                                                      | 6.3.2.6   |
| rxn02834    | PRATPP      | phosphoribosyl-ATP pyrophosphatase                      | h2o[c] + prbatp[c] => h[c] + ppi[c] + prbamp[c]                                     | 0   | BT_1377                                    | 0     | 1000 | 2  | Histidine Metabolism                       |           | Reviewed bifunctional phosphoribosyl-AMP cyclohydrolase/phosphoribosyl-ATP-pyrophosphatase (NCBI Gene)                               | 3.6.1.31  |
| rxn03084    | PRFGS       | phosphoribosylformylglycinamide synthase                | h2o[c] + atp[c] + gln-L[c] + fgam[c] => h[c] + glu-L[c] + pi[c] + adp[c] + fpram[c] | 0   | BT_1733                                    | 0     | 1000 | 2  | Purine and Pyrimidine Biosynthesis         |           |                                                                                                                                      | 6.3.5.3   |

| SEED Rxn ID | BIGG Rxn ID | Function                                                                                          | Formula                                              | Rev | GA                              | LB    | UB   | CS | Subsystem                                          | Reference                                   | Notes                                                                                                                    | EC Number |
|-------------|-------------|---------------------------------------------------------------------------------------------------|------------------------------------------------------|-----|---------------------------------|-------|------|----|----------------------------------------------------|---------------------------------------------|--------------------------------------------------------------------------------------------------------------------------|-----------|
| rxn03175    | PRMICI      | 1-(5-phosphoribosyl)-5-[(5-phosphoribosylamino)methylideneamino]imidazole-4-carboxamide isomerase | prfp[c] <=> prlp[c]                                  | 1   | BT_1379                         | -1000 | 1000 | 2  | Histidine Metabolism                               |                                             |                                                                                                                          | 5.3.1.16  |
| rxn00929    | PRO1x       | L-ProlineNAD+ 5-oxidoreductase                                                                    | nad[c] + pro-L[c] => 2 h[c] + nadh[c] + 1pyr5c[c]    | 0   | (BT_1902 or BT_3757)            | 0     | 1000 | 2  | Arginine and Proline Metabolism                    |                                             | Reversible reaction in Model SEED                                                                                        | 1.5.1.2   |
| rxn09188    | PROD2       | Proline dehydrogenase                                                                             | pro-L[c] + fad[c] => h[c] + 1pyr5c[c] + fadh2[c]     | 0   | BT_3115                         | 0     | 1000 | 2  | Arginine and Proline Metabolism                    | PMID: 18369526                              | Reversible reaction in Model SEED                                                                                        | 1.5.99.8  |
| rxn02359    | PROD3       | Proline dehydrogenase (trans-4-Hydroxy-L-proline)                                                 | fad[c] + 4hpro-LT[c] <=> h[c] + 1p3h5c[c] + fadh2[c] | 1   | BT_3115                         | -1000 | 1000 | 2  | Arginine and Proline Metabolism                    | PMID:19140736                               | Ref. PMID:19140736 suggests FAD as cofactor. It is not known if the reaction is dependent on FAD in B. thetaiotaomicron. | 1.5.99.8  |
|             | PROGLYt     | L-prolylglycine transport via proton symport                                                      | h[e] + progly[e] => h[c] + progly[c]                 | 0   | (BT_0580 or BT_4385 or BT_1086) | 0     | 1000 | 2  | Transport, Extracellular                           |                                             | Genes added based on TransportDB (last consulted 06.06.12).                                                              |           |
| rxn05221    | PROt4r      | proline transporter                                                                               | na1[e] + pro-L[e] <=> na1[c] + pro-L[c]              | 1   | BT_0182                         | -1000 | 1000 | 2  | Transport, Extracellular                           |                                             |                                                                                                                          |           |
| rxn00770    | PRPPS       | phosphoribosylpyrophosphate synthetase                                                            | atp[c] + r5p[c] <=> h[c] + amp[c] + prpp[c]          | 1   | BT_0748                         | -1000 | 1000 | 2  | Pentose Phosphate Pathway                          |                                             |                                                                                                                          | 2.7.6.1   |
| rxn02476    | PSCVT       | 3-phosphoshikimate 1-carboxyvinyltransferase                                                      | pep[c] + skm5p[c] <=> pi[c] + 3psme[c]               | 1   | BT_2186                         | -1000 | 1000 | 2  | Tyrosine, Tryptophan, and Phenylalanine Metabolism |                                             |                                                                                                                          | 2.5.1.19  |
| rxn09197    | PSD120      | Phosphatidylserine decarboxylase (n-C12:0)                                                        | h[c] + ps120[c] => co2[c] + pe120[c]                 | 0   | BT_2231                         | 0     | 1000 | 3  | Glycerophospholipid Metabolism                     | PMID: 6102980, PMID: 7440508, PMID: 7204330 | Reversible reaction in Model SEED. The fatty acid composition of B. thetaiotaomicron was determined experimentally.      | 4.1.1.65  |

| SEED Rxn ID | BIGG Rxn ID | Function                                              | Formula                                   | Rev | GA      | LB | UB   | CS | Subsystem                      | Reference                                   | Notes                                                                                                                                                                                                                            | EC Number |
|-------------|-------------|-------------------------------------------------------|-------------------------------------------|-----|---------|----|------|----|--------------------------------|---------------------------------------------|----------------------------------------------------------------------------------------------------------------------------------------------------------------------------------------------------------------------------------|-----------|
| rxn09198    | PSD140      | Phosphatidylserine decarboxylase (n-C14:0)            | h[c] + ps140[c]<br>=> co2[c] + pe140[c]   | 0   | BT_2231 | 0  | 1000 | 3  | Glycerophospholipid Metabolism | PMID: 6102980, PMID: 7440508, PMID: 7204330 | Reversible reaction in Model SEED. The fatty acid composition of B. thetaiotaomicron was determined experimentally.                                                                                                              | 4.1.1.65  |
| rxn09200    | PSD160      | Phosphatidylserine decarboxylase (n-C16:0)            | h[c] + ps160[c]<br>=> co2[c] + pe160[c]   | 0   | BT_2231 | 0  | 1000 | 3  | Glycerophospholipid Metabolism | PMID: 6102980, PMID: 7440508, PMID: 7204330 | Reversible reaction in Model SEED. The fatty acid composition of B. thetaiotaomicron was determined experimentally.                                                                                                              | 4.1.1.65  |
| rxn09202    | PSD180      | Phosphatidylserine decarboxylase (n-C18:0)            | h[c] + ps180[c]<br>=> co2[c] + pe180[c]   | 0   | BT_2231 | 0  | 1000 | 3  | Glycerophospholipid Metabolism | PMID: 6102980, PMID: 7440508, PMID: 7204330 | Reversible reaction in Model SEED. The fatty acid composition of B. thetaiotaomicron was determined experimentally.                                                                                                              | 4.1.1.65  |
| rxn09203    | PSD181      | Phosphatidylserine decarboxylase (n-C18:1)            | h[c] + ps181[c]<br>=> co2[c] + pe181[c]   | 0   | BT_2231 | 0  | 1000 | 3  | Glycerophospholipid Metabolism | PMID: 6102980, PMID: 7440508, PMID: 7204330 | Reversible reaction in Model SEED. The fatty acid composition of B. thetaiotaomicron was determined experimentally.                                                                                                              | 4.1.1.65  |
| rxn10236    | PSDA115     | anteisopentadecanoyl-phosphatidylserine decarboxylase | h[c] + psai15[c]<br>=> co2[c] + peai15[c] | 0   | BT_2231 | 0  | 1000 | 3  | Glycerophospholipid Metabolism | PMID: 6102980, PMID: 7440508, PMID: 7204330 | Added manually to BIGG database based on reaction mechanism proposed by Model SEED. This reaction is involved in fatty acid biosynthesis. B. thetaiotaomicron is well known to synthesize iso- and anteiso-branched fatty acids. | 4.1.1.65  |

| SEED Rxn ID | BIGG Rxn ID | Function                                              | Formula                                   | Rev | GA      | LB | UB   | CS | Subsystem                      | Reference                                   | Notes                                                                                                                                                                                                                            | EC Number |
|-------------|-------------|-------------------------------------------------------|-------------------------------------------|-----|---------|----|------|----|--------------------------------|---------------------------------------------|----------------------------------------------------------------------------------------------------------------------------------------------------------------------------------------------------------------------------------|-----------|
| rxn10233    | PSDAI17     | anteisoheptadecanoyl-phosphatidylserine decarboxylase | h[c] + psai17[c]<br>=> co2[c] + peai17[c] | 0   | BT_2231 | 0  | 1000 | 3  | Glycerophospholipid Metabolism | PMID: 6102980, PMID: 7440508, PMID: 7204330 | Added manually to BIGG database based on reaction mechanism proposed by Model SEED. This reaction is involved in fatty acid biosynthesis. B. thetaiotaomicron is well known to synthesize iso- and anteiso-branched fatty acids. | 4.1.1.65  |
| rxn10234    | PSDI14      | isotetradecanoyl-phosphatidylserine decarboxylase     | h[c] + psi14[c]<br>=> co2[c] + pei14[c]   | 0   | BT_2231 | 0  | 1000 | 3  | Glycerophospholipid Metabolism | PMID: 6102980, PMID: 7440508, PMID: 7204330 | Added manually to BIGG database based on reaction mechanism proposed by Model SEED. This reaction is involved in fatty acid biosynthesis. B. thetaiotaomicron is well known to synthesize iso- and anteiso-branched fatty acids. | 4.1.1.65  |
| rxn10235    | PSDI15      | isopentadecanoyl-phosphatidylserine decarboxylase     | h[c] + psi15[c]<br>=> co2[c] + pei15[c]   | 0   | BT_2231 | 0  | 1000 | 3  | Glycerophospholipid Metabolism | PMID: 6102980, PMID: 7440508, PMID: 7204330 | Added manually to BIGG database based on reaction mechanism proposed by Model SEED. This reaction is involved in fatty acid biosynthesis. B. thetaiotaomicron is well known to synthesize iso- and anteiso-branched fatty acids. | 4.1.1.65  |

| SEED Rxn ID | BIGG Rxn ID | Function                                          | Formula                                             | Rev | GA      | LB    | UB   | CS | Subsystem                                 | Reference                                   | Notes                                                                                                                                                                                                                            | EC Number |
|-------------|-------------|---------------------------------------------------|-----------------------------------------------------|-----|---------|-------|------|----|-------------------------------------------|---------------------------------------------|----------------------------------------------------------------------------------------------------------------------------------------------------------------------------------------------------------------------------------|-----------|
| rxn10237    | PSDI16      | isoheptadecanoyl-phosphatidylserine decarboxylase | h[c] + psi16[c] => co2[c] + pei16[c]                | 0   | BT_2231 | 0     | 1000 | 3  | Glycerophospholipid Metabolism            | PMID: 6102980, PMID: 7440508, PMID: 7204330 | Added manually to BIGG database based on reaction mechanism proposed by Model SEED. This reaction is involved in fatty acid biosynthesis. B. thetaiotaomicron is well known to synthesize iso- and anteiso-branched fatty acids. | 4.1.1.65  |
| rxn10232    | PSDI17      | isoheptadecanoyl-phosphatidylserine decarboxylase | h[c] + psi17[c] => co2[c] + pei17[c]                | 0   | BT_2231 | 0     | 1000 | 3  | Glycerophospholipid Metabolism            | PMID: 6102980, PMID: 7440508, PMID: 7204330 | Added manually to BIGG database based on reaction mechanism proposed by Model SEED. This reaction is involved in fatty acid biosynthesis. B. thetaiotaomicron is well known to synthesize iso- and anteiso-branched fatty acids. | 4.1.1.65  |
| rxn02914    | PSERTr      | 3-Phosphoserine2-oxoglutarate aminotransferase    | akg[c] + pser-L[c] <=> glu-L[c] + 3php[c]           | 1   | BT_1153 | -1000 | 1000 | 2  | Glycine, Serine, and Threonine Metabolism |                                             |                                                                                                                                                                                                                                  | 2.6.1.52  |
| rxn00420    | PSP_L       | phosphoserine phosphatase (L-serine)              | h2o[c] + pser-L[c] => pi[c] + ser-L[c]              | 0   | BT_0832 | 0     | 1000 | 2  | Glycine, Serine, and Threonine Metabolism |                                             | Putative annotation (NCBI)                                                                                                                                                                                                       | 3.1.3.3   |
| rxn09205    | PSSA120     | Phosphatidylserine syntase (n-C12:0)              | ser-L[c] + cdpdddecg[c] => h[c] + cmp[c] + ps120[c] | 0   | BT_2232 | 0     | 1000 | 3  | Glycerophospholipid Metabolism            | PMID: 6102980, PMID: 7440508, PMID: 7204330 | The fatty acid composition of B. thetaiotaomicron was determined experimentally.                                                                                                                                                 | 2.7.8.8   |
| rxn09206    | PSSA140     | Phosphatidylserine syntase (n-C14:0)              | ser-L[c] + cdpdtdecg[c] => h[c] + cmp[c] + ps140[c] | 0   | BT_2232 | 0     | 1000 | 3  | Glycerophospholipid Metabolism            | PMID: 6102980, PMID: 7440508, PMID: 7204330 | The fatty acid composition of B. thetaiotaomicron was determined experimentally.                                                                                                                                                 | 2.7.8.8   |

| SEED Rxn ID | BIGG Rxn ID | Function                                                                | Formula                                                 | Rev | GA      | LB | UB   | CS | Subsystem                      | Reference                                   | Notes                                                                                                                                                                                                                            | EC Number |
|-------------|-------------|-------------------------------------------------------------------------|---------------------------------------------------------|-----|---------|----|------|----|--------------------------------|---------------------------------------------|----------------------------------------------------------------------------------------------------------------------------------------------------------------------------------------------------------------------------------|-----------|
| rxn09208    | PSSA160     | Phosphatidylserine syntase (n-C16:0)                                    | ser-L[c] + cdpdhdecg[c] => h[c] + cmp[c] + ps160[c]     | 0   | BT_2232 | 0  | 1000 | 3  | Glycerophospholipid Metabolism | PMID: 6102980, PMID: 7440508, PMID: 7204330 | The fatty acid composition of B. thetaiotaomicron was determined experimentally.                                                                                                                                                 | 2.7.8.8   |
| rxn09210    | PSSA180     | Phosphatidylserine syntase (n-C18:0)                                    | ser-L[c] + cdpdodecg[c] => h[c] + cmp[c] + ps180[c]     | 0   | BT_2232 | 0  | 1000 | 3  | Glycerophospholipid Metabolism | PMID: 6102980, PMID: 7440508, PMID: 7204330 | The fatty acid composition of B. thetaiotaomicron was determined experimentally.                                                                                                                                                 | 2.7.8.8   |
| rxn09211    | PSSA181     | Phosphatidylserine syntase (n-C18:1)                                    | ser-L[c] + cdpdodec1leg[c] => h[c] + cmp[c] + ps181[c]  | 0   | BT_2232 | 0  | 1000 | 3  | Glycerophospholipid Metabolism | PMID: 6102980, PMID: 7440508, PMID: 7204330 | The fatty acid composition of B. thetaiotaomicron was determined experimentally.                                                                                                                                                 | 2.7.8.8   |
| rxn10230    | PSSAAI15    | anteisopentadecanoyl-CDPdiacylglycerol-serine O-phosphatidyltransferase | ser-L[c] + cdpdaipecg[c] => h[c] + cmp[c] + psai15[c]   | 0   | BT_2232 | 0  | 1000 | 3  | Glycerophospholipid Metabolism | PMID: 6102980, PMID: 7440508, PMID: 7204330 | Added manually to BIGG database based on reaction mechanism proposed by Model SEED. This reaction is involved in fatty acid biosynthesis. B. thetaiotaomicron is well known to synthesize iso- and anteiso-branched fatty acids. | 2.7.8.8   |
| rxn10227    | PSSAAI17    | anteisoheptadecanoyl-CDPdiacylglycerol-serine O-phosphatidyltransferase | ser-L[c] + cdpdaihpdecg[c] => h[c] + cmp[c] + psai17[c] | 0   | BT_2232 | 0  | 1000 | 3  | Glycerophospholipid Metabolism | PMID: 6102980, PMID: 7440508, PMID: 7204330 | Added manually to BIGG database based on reaction mechanism proposed by Model SEED. This reaction is involved in fatty acid biosynthesis. B. thetaiotaomicron is well known to synthesize iso- and anteiso-branched fatty acids. | 2.7.8.8   |

| SEED Rxn ID | BIGG Rxn ID | Function                                                            | Formula                                              | Rev | GA      | LB | UB   | CS | Subsystem                      | Reference                                   | Notes                                                                                                                                                                                                                            | EC Number |
|-------------|-------------|---------------------------------------------------------------------|------------------------------------------------------|-----|---------|----|------|----|--------------------------------|---------------------------------------------|----------------------------------------------------------------------------------------------------------------------------------------------------------------------------------------------------------------------------------|-----------|
| rxn10228    | PSSAI14     | isotetradecanoyl-CDPdiacylglycerol-serine O-phosphatidyltransferase | ser-L[c] + cdpditdecg[c] => h[c] + cmp[c] + psi14[c] | 0   | BT_2232 | 0  | 1000 | 3  | Glycerophospholipid Metabolism | PMID: 6102980, PMID: 7440508, PMID: 7204330 | Added manually to BIGG database based on reaction mechanism proposed by Model SEED. This reaction is involved in fatty acid biosynthesis. B. thetaiotaomicron is well known to synthesize iso- and anteiso-branched fatty acids. | 2.7.8.8   |
| rxn10229    | PSSAI15     | isopentadecanoyl-CDPdiacylglycerol-serine O-phosphatidyltransferase | ser-L[c] + cdpdipdecg[c] => h[c] + cmp[c] + psi15[c] | 0   | BT_2232 | 0  | 1000 | 3  | Glycerophospholipid Metabolism | PMID: 6102980, PMID: 7440508, PMID: 7204330 | Added manually to BIGG database based on reaction mechanism proposed by Model SEED. This reaction is involved in fatty acid biosynthesis. B. thetaiotaomicron is well known to synthesize iso- and anteiso-branched fatty acids. | 2.7.8.8   |
| rxn10231    | PSSAI16     | isohexadecanoyl-CDPdiacylglycerol-serine O-phosphatidyltransferase  | ser-L[c] + cdpdihdecg[c] => h[c] + cmp[c] + psi16[c] | 0   | BT_2232 | 0  | 1000 | 3  | Glycerophospholipid Metabolism | PMID: 6102980, PMID: 7440508, PMID: 7204330 | Added manually to BIGG database based on reaction mechanism proposed by Model SEED. This reaction is involved in fatty acid biosynthesis. B. thetaiotaomicron is well known to synthesize iso- and anteiso-branched fatty acids. | 2.7.8.8   |

| SEED Rxn ID | BIGG Rxn ID | Function                                                            | Formula                                                      | Rev | GA                                                                                                            | LB    | UB   | CS | Subsystem                                  | Reference                                                                | Notes                                                                                                                                                                                                                            | EC Number     |
|-------------|-------------|---------------------------------------------------------------------|--------------------------------------------------------------|-----|---------------------------------------------------------------------------------------------------------------|-------|------|----|--------------------------------------------|--------------------------------------------------------------------------|----------------------------------------------------------------------------------------------------------------------------------------------------------------------------------------------------------------------------------|---------------|
| rxn10226    | PSSAI17     | isoheptadecanoyl-CDPdiacylglycerol-serine O-phosphatidyltransferase | ser-L[c] + cdpdihpdecg[c] => h[c] + cmp[c] + psi17[c]        | 0   | BT_2232                                                                                                       | 0     | 1000 | 3  | Glycerophospholipid Metabolism             | PMID: 6102980, PMID: 7440508, PMID: 7204330                              | Added manually to BIGG database based on reaction mechanism proposed by Model SEED. This reaction is involved in fatty acid biosynthesis. B. thetaiotaomicron is well known to synthesize iso- and anteiso-branched fatty acids. | 2.7.8.8       |
| rxn00670    | PTA2        | Phosphate acetyltransferase                                         | pi[c] + ppcoa[c] => coa[c] + ppap[c]                         | 0   | BT_3692                                                                                                       | 0     | 1000 | 2  | Alternate Carbon Metabolism                |                                                                          | Reversible reaction in Model SEED                                                                                                                                                                                                | 2.3.1.8       |
| rxn00173    | PTAr        | phosphotransacetylase                                               | pi[c] + accoa[c] <=> coa[c] + actp[c]                        | 1   | BT_3692                                                                                                       | -1000 | 1000 | 2  | Central Metabolism                         |                                                                          |                                                                                                                                                                                                                                  | 2.3.1.8       |
| rxn02175    | PTPAT       | Phosphopantetheine adenyltransferase (EC 2.7.7.3)                   | h[c] + atp[c] + pan4p[c] <=> ppi[c] + dpcoa[c]               | 1   | BT_3034                                                                                                       | -1000 | 1000 | 2  | Cofactor and Prosthetic Group Biosynthesis |                                                                          |                                                                                                                                                                                                                                  | 2.7.7.3       |
| rxn05163    | PTRCabc     | Putrescine-ABC transport                                            | h2o[c] + atp[c] + ptrc[e] => h[c] + pi[c] + adp[c] + ptrc[c] | 0   | (BT_1288 and BT_1289 and BT_1290 and BT_1291)                                                                 | 0     | 1000 | 2  | Transport, Extracellular                   |                                                                          |                                                                                                                                                                                                                                  | TC 3.A.1.11.1 |
|             | PTRCtex2    | putrescine excretion (cytosol to extracellular)                     | ptrc[c] => ptrc[e]                                           | 0   |                                                                                                               | 0     | 1000 | 2  | Transport, Extracellular                   | PMID:10801923                                                            | B. thetaiotaomicron secretes putrescine and spermidine.                                                                                                                                                                          |               |
|             | PULLe       | pullulane hydrolysis by alpha-1,6 pullulanase and alpha-amylase     | 399 h2o[e] + pullulan1200[e] => 400 malttr[e]                | 0   | ((BT_3698 and BT_3701 and BT_3702) or (BT_3701 and BT_3702 and BT_4689) or (BT_1663 and BT_3701 and BT_3702)) | 0     | 1000 | 4  | Plant Polysaccharide Degradation           | PMID:10986238, PMID:2722747, PMID:8955399, PMID: 18981178, PMID:18611383 | The starch utilization system of B. thetaiotaomicron is well characterized.                                                                                                                                                      |               |
| rxn01138    | PUNP1       | purine-nucleoside phosphorylase (Adenosine)                         | pi[c] + adn[c] <=> ade[c] + r1p[c]                           | 1   | (BT_1881 or BT_4554)                                                                                          | -1000 | 1000 | 2  | Nucleotide Salvage Pathway                 |                                                                          |                                                                                                                                                                                                                                  | 3.4.2.1       |
| rxn01859    | PUNP2       | purine-nucleoside phosphorylase (Deoxyadenosine)                    | pi[c] + dad-2[c] <=> ade[c] + 2dr1p[c]                       | 1   | (BT_1881 or BT_4554)                                                                                          | -1000 | 1000 | 2  | Nucleotide Salvage Pathway                 |                                                                          |                                                                                                                                                                                                                                  | 3.4.2.1       |

| SEED Rxn ID | BIGG Rxn ID | Function                                         | Formula                                                    | Rev | GA                   | LB    | UB   | CS | Subsystem                                  | Reference | Notes                             | EC Number |
|-------------|-------------|--------------------------------------------------|------------------------------------------------------------|-----|----------------------|-------|------|----|--------------------------------------------|-----------|-----------------------------------|-----------|
| rxn01548    | PUNP3       | purine-nucleoside phosphorylase (Guanosine)      | pi[c] + gsn[c] <=> gua[c] + r1p[c]                         | 1   | (BT_1881 or BT_4554) | -1000 | 1000 | 2  | Nucleotide Salvage Pathway                 |           |                                   | 3.4.2.1   |
| rxn01446    | PUNP4       | purine-nucleoside phosphorylase (Deoxyguanosine) | pi[c] + dgsn[c] <=> 2dr1p[c] + gua[c]                      | 1   | (BT_1881 or BT_4554) | -1000 | 1000 | 2  | Nucleotide Salvage Pathway                 |           |                                   | 3.4.2.1   |
| rxn01358    | PUNP5       | purine-nucleoside phosphorylase (Inosine)        | pi[c] + ins[c] <=> hxn[c] + r1p[c]                         | 1   | (BT_1881 or BT_4554) | -1000 | 1000 | 2  | Nucleotide Salvage Pathway                 |           |                                   | 3.4.2.1   |
| rxn01985    | PUNP6       | purine-nucleoside phosphorylase (Deoxyinosine)   | pi[c] + din[c] <=> 2dr1p[c] + hxn[c]                       | 1   | (BT_1881 or BT_4554) | -1000 | 1000 | 2  | Nucleotide Salvage Pathway                 |           |                                   | 3.4.2.1   |
| rxn01649    | PUNP7       | purine-nucleoside phosphorylase (Xanthosine)     | pi[c] + xtsn[c] <=> r1p[c] + xan[c]                        | 1   | (BT_1881 or BT_4554) | -1000 | 1000 | 2  | Nucleotide Salvage Pathway                 |           |                                   | 3.4.2.1   |
| rxn00183    | PUTA3       | puta3                                            | h2o[c] + nad[c] + glu5sa[c] => 2 h[c] + glu-L[c] + nadh[c] | 0   | BT_3115              | 0     | 1000 | 2  | Glutamate Metabolism                       |           | Reversible reaction in Model SEED | 1.5.1.12  |
| rxn00208    | PYAM5PO     | pyridoxamine 5'-phosphate oxidase                | h2o[c] + o2[c] + pyam5p[c] => nh4[c] + h2o2[c] + pydx5p[c] | 0   | BT_1577              | 0     | 1000 | 2  | Cofactor and Prosthetic Group Biosynthesis |           |                                   | 1.4.3.5   |
| rxn01807    | PYDAMK      | pyridoxamine kinase                              | atp[c] + pydam[c] => h[c] + adp[c] + pyam5p[c]             | 0   | BT_4458              | 0     | 1000 | 2  | Vitamin B6 Metabolism                      |           | Reversible reaction in Model SEED | 2.7.1.35  |
| rxn00124    | PYDXK       | pyridoxal kinase                                 | atp[c] + pydx[c] => h[c] + adp[c] + pydx5p[c]              | 0   | BT_4458              | 0     | 1000 | 2  | Vitamin B6 Metabolism                      |           | Reversible reaction in Model SEED | 2.7.1.35  |
| rxn01396    | PYDXNK      | pyridoxine kinase                                | atp[c] + pydxn[c] => h[c] + adp[c] + pdx5p[c]              | 0   | BT_4458              | 0     | 1000 | 2  | Vitamin B6 Metabolism                      |           | Reversible reaction in Model SEED | 2.7.1.35  |
| rxn01252    | PYDXNO      | pyridoxine oxidase                               | o2[c] + pydxn[c] <=> h2o2[c] + pydx[c]                     | 1   | BT_1577              | -1000 | 1000 | 2  | Vitamin B6 Metabolism                      |           |                                   | 1.4.3.5   |

| SEED Rxn ID | BIGG Rxn ID | Function                                         | Formula                                                          | Rev | GA                    | LB    | UB   | CS | Subsystem                  | Reference                               | Notes                                                                                                                                                                                                                                                                                | EC Number |
|-------------|-------------|--------------------------------------------------|------------------------------------------------------------------|-----|-----------------------|-------|------|----|----------------------------|-----------------------------------------|--------------------------------------------------------------------------------------------------------------------------------------------------------------------------------------------------------------------------------------------------------------------------------------|-----------|
|             | PYDXNtr     | pyridoxine transport via diffusion               | pydxn[e] <=> pydxn[c]                                            | 1   |                       | -1000 | 1000 | 2  | Transport, Extracellular   | PMID:894368, PMID:9167138, PMID:9562034 | It is well established that the gut microbiota produces B vitamins in mammals. Germ-free rats fed a pyridoxine-free diet suffer far more severe deficiency symptoms than conventional rats (PMID:894368). Pyridoxine transport by B. thetaiotaomicron is therefore assumed to occur. |           |
|             | PYDXO       | pyridoxal oxidase                                | 2 h2o[c] + nh4[c] + 0.5 o2[c] + pydx[c] <=> 2 h2o2[c] + pydam[c] | 1   | BT_1577               | -1000 | 1000 | 2  | Vitamin B6 Metabolism      |                                         |                                                                                                                                                                                                                                                                                      | 1.4.3.5   |
| rxn00148    | PYK         | pyruvate kinase                                  | h[c] + adp[c] + pep[c] => pyr[c] + atp[c]                        | 0   | BT_2841               | 0     | 1000 | 2  | Glycolysis/Gluconeogenesis | PMID:148460                             | Reversible reaction in SEED. The enzyme was demonstrated by enzyme assay in the close relative B. fragilis.                                                                                                                                                                          | 2.7.1.40  |
|             | PYRt2r      | pyruvate reversible transport via proton symport | h[e] + pyr[e] <=> h[c] + pyr[c]                                  | 1   |                       | -1000 | 1000 | 2  | Transport, Extracellular   | PMID:11260473                           | No gene found, but B. thetaiotaomicron was shown to secrete pyruvate.                                                                                                                                                                                                                |           |
|             | QMO3        | quinol monooxygenase (menaquinol 8)              | mql8[c] + 2 o2[c] => 2 h[c] + mqn8[c] + 2 o2s[c]                 | 0   | (BT_3054 and BT_3055) | 0     | 1000 | 2  | Central Metabolism         | PMID:7649986, PMID:11260473             | The reaction seems to be carried out by fumarate reductase. When it is exposed to air, fumarate reductase generates oxygen free radicals through autooxidation. The electrons seem to pass from reduced menaquinone via Fe-S clusters and a flavin to oxygen.                        |           |

| SEED Rxn ID | BIGG Rxn ID | Function                                       | Formula                                                                   | Rev | GA                                                                              | LB | UB   | CS | Subsystem                                           | Reference                                        | Notes                                                                                                                           | EC Number |
|-------------|-------------|------------------------------------------------|---------------------------------------------------------------------------|-----|---------------------------------------------------------------------------------|----|------|----|-----------------------------------------------------|--------------------------------------------------|---------------------------------------------------------------------------------------------------------------------------------|-----------|
| rxn02988    | QULNS       | quinolinate synthase                           | dhap[c] + iasp[c]<br>=> 2 h2o[c] +<br>pi[c] + quln[c]                     | 0   | BT_3164                                                                         | 0  | 1000 | 2  | Cofactor and<br>Prosthetic<br>Group<br>Biosynthesis |                                                  |                                                                                                                                 | 4.1.99.-  |
|             | RAFFabc     | raffinose transport via<br>ABC system (import) | h2o[c] + atp[c] +<br>raffin[e] => h[c]<br>+ pi[c] + adp[c]<br>+ raffin[c] | 0   |                                                                                 | 0  | 1000 | 2  | Transport,<br>Extracellular                         | PMID:2557798                                     | B. thetaiotaomicron<br>can use raffinose as<br>carbon source.                                                                   |           |
| rxn00818    | RAFGH       | Raffinose<br>galactohydrolase                  | h2o[c] + raffin[c]<br>=> gal[c] +<br>sucr[c]                              | 0   | (BT_1871 or<br>BT_2851 or<br>BT_3065 or<br>BT_3131 or<br>BT_3133 or<br>BT_3410) | 0  | 1000 | 4  | Plant<br>Polysaccharide<br>Degradation              | PMID:19646996,<br>PMID:18848471,<br>PMID:2557798 | B. thetaiotaomicron<br>can use raffinose as<br>carbon source.                                                                   | 3.2.1.22  |
| rxn01737    | RAFH        | raffinose hydrolyzing<br>enzyme                | h2o[c] + raffin[c]<br>=> fru[c] +<br>melib[c]                             | 0   | BT_1765                                                                         | 0  | 1000 | 4  | Plant<br>Polysaccharide<br>Degradation              | PMID:<br>20603004,<br>PMID:2557798               | Reversible reaction in<br>Model SEED. B.<br>thetaiotaomicron can<br>use raffinose as<br>carbon source.                          | 3.2.1.26  |
| rxn00392    | RBFK        | riboflavin kinase                              | atp[c] + ribflv[c]<br>=> h[c] + adp[c]<br>+ fmnc[c]                       | 0   | BT_2543                                                                         | 0  | 1000 | 2  | Cofactor and<br>Prosthetic<br>Group<br>Biosynthesis |                                                  | Reversible reaction in<br>Model SEED                                                                                            | 2.7.1.26  |
| rxn03080    | RBFSa       | riboflavin synthase                            | db4p[c] +<br>4r5au[c] => 2<br>h2o[c] + pi[c] +<br>dmlz[c]                 | 0   | BT_4253                                                                         | 0  | 1000 | 3  | Cofactor and<br>Prosthetic<br>Group<br>Biosynthesis | PMID:4853401                                     | B. thetaiotaomicron<br>does not require<br>riboflavin in medium,<br>therefore presence of<br>biosynthesis pathway<br>is likely. | 2.5.1.9   |
| rxn00048    | RBFSb       | riboflavin synthase                            | 2 dmlz[c] =><br>ribflv[c] +<br>4r5au[c]                                   | 0   | BT_1317                                                                         | 0  | 1000 | 3  | Cofactor and<br>Prosthetic<br>Group<br>Biosynthesis | PMID:4853401                                     | B. thetaiotaomicron<br>does not require<br>riboflavin in medium,<br>therefore presence of<br>biosynthesis pathway<br>is likely. | 2.5.1.9   |
| rxn00772    | RBK         | ribokinase                                     | atp[c] + rib-D[c]<br>=> h[c] + adp[c]<br>+ r5p[c]                         | 0   | (BT_2799 or<br>BT_3576 or<br>(BT_2803 and<br>BT_2804))                          | 0  | 1000 | 2  | Pentose<br>Phosphate<br>Pathway                     |                                                  |                                                                                                                                 | 2.7.1.15  |
| rxn01114    | RBK_D       | D-ribulokinase                                 | atp[c] + rbl-D[c]<br>=> h[c] + ru5p-<br>D[c] + adp[c]                     | 0   | BT_0350                                                                         | 0  | 1000 | 2  | Pentose and<br>Glucuronate<br>Interconversions      |                                                  |                                                                                                                                 | 2.7.1.47  |

| SEED Rxn ID | BIGG Rxn ID | Function                                   | Formula                                                                                                                                       | Rev | GA      | LB    | UB   | CS | Subsystem                       | Reference                                         | Notes                                                                                                                                                                                                                                                      | EC Number |
|-------------|-------------|--------------------------------------------|-----------------------------------------------------------------------------------------------------------------------------------------------|-----|---------|-------|------|----|---------------------------------|---------------------------------------------------|------------------------------------------------------------------------------------------------------------------------------------------------------------------------------------------------------------------------------------------------------------|-----------|
| rxn01763    | RBK_L1      | L-ribulokinase (L-ribulose)                | atp[c] + rbl-L[c]<br>=> h[c] + adp[c]<br>+ ru5p-L[c]                                                                                          | 0   | BT_0350 | 0     | 1000 | 4  | Alternate Carbon Metabolism     | PMID:16887504                                     | Needed for L-arabinose utilization, which can serve as sole carbon source for B. thetaiotaomicron.                                                                                                                                                         | 2.7.1.16  |
| rxn04082    | RBP4E       | L-ribulose-phosphate 4-epimerase           | ru5p-L[c] <=><br>xu5p-D[c]                                                                                                                    | 1   | BT_0353 | -1000 | 1000 | 2  | Alternate Carbon Metabolism     |                                                   |                                                                                                                                                                                                                                                            | 5.1.3.4   |
|             | RFA_BT      | Formation of lipidA and sugar core for LPS | adpheap-DD[c] +<br>adpheap-LD[c] +<br>kdolipid4L_bt[c]<br>+ 2 udpgal[c] +<br>adpheap7p-LD[c]<br>=> 3 adp[c] + 3<br>udp[c] +<br>core_lps_bt[c] | 0   |         | 0     | 1000 | 2  | Lipopolysaccharide Biosynthesis | PMID:18931137,<br>PMID:19460428,<br>PMID:20974832 | Based on H. pylori LPS biosynthesis (BIGG database), as in the P. gingivalis reconstruction (PMID:18931137). P. gingivalis' LPS is similar in structure to the Bacteroides LPS. Based on structural information taken from (PMID:19460428, PMID:20974832). |           |
|             | RFAC_HP     | RFAC HP                                    | atp[c] + adpheap-LD[c] => h[c] +<br>adp[c] +<br>adpheap7p-LD[c]                                                                               | 0   |         | 0     | 1000 | 2  | Lipopolysaccharide Biosynthesis | PMID:18931137,<br>PMID:19460428,<br>PMID:20974832 | Based on H. pylori LPS biosynthesis (BIGG database), as in the P. gingivalis reconstruction (PMID:18931137). P. gingivalis' LPS is similar in structure to the Bacteroides LPS. Based on structural information taken from (PMID:19460428, PMID:20974832). |           |

| SEED Rxn ID | BIGG Rxn ID        | Function                                        | Formula                                                                                                                                                                                                                        | Rev | GA                                                                                                                                                                                                                                                                                                                                                                                                                                               | LB | UB   | CS | Subsystem                        | Reference      | Notes                                                                                                                                                                                                                                                                                                    | EC Number |
|-------------|--------------------|-------------------------------------------------|--------------------------------------------------------------------------------------------------------------------------------------------------------------------------------------------------------------------------------|-----|--------------------------------------------------------------------------------------------------------------------------------------------------------------------------------------------------------------------------------------------------------------------------------------------------------------------------------------------------------------------------------------------------------------------------------------------------|----|------|----|----------------------------------|----------------|----------------------------------------------------------------------------------------------------------------------------------------------------------------------------------------------------------------------------------------------------------------------------------------------------------|-----------|
|             | RHAMNOGALUR ASEe_I | Rhamnogalacturonan I degradation, extracellular | $979 \text{ h}_2\text{o}[\text{e}] + \text{rhamnogalurl}[\text{e}] \Rightarrow 30 \text{ arab-L}[\text{e}] + 120 \text{ gal}[\text{e}] + 200 \text{ rmn}[\text{e}] + 620 \text{ galur}[\text{e}] + 10 \text{ xyl-D}[\text{e}]$ | 0   | (BT_1021 and BT_3662 and (BT_4152 or BT_0983 or BT_0992 or BT_0993 or BT_0996) and (BT_1001 or BT_1013 or BT_1019) and (BT_4146 or BT_4149 or BT_4153 or BT_4155 or BT_4183 or BT_4115 or BT_4116 or BT_1011 or BT_1018) and (BT_4150 or BT_4173) and BT_4175 and (BT_4109 or BT_4110) and ((BT_4670 and BT_4671) or (BT_4164 and BT_4165) or (BT_4113 and BT_4114) or (BT_1028 and BT_1029) or (BT_1683 and BT_1683) or (BT_3670 and BT_3671))) | 0  | 1000 | 4  | Plant Polysaccharide Degradation | PMID: 22205877 | B. thetaiotaomicron grows on rhamnogalacturonan I. The genes included in the GPR are upregulated during growth. Enzymes/ proteins assumed to be involved: arabinosidase, xylosidase, galactosidase, galacturonisidase, rhamnogalactorunan esterase, rhamnogalacturonan lyase, pectinesterase, susC/ SusD |           |

| SEED Rxn ID | BIGG Rxn ID        | Function                                         | Formula                                                                                                                                                                                                                                                                                                                                                                                                                         | Rev | GA                                                                                                                                                                                                                                                                                                                                                                                                                                                                                                                         | LB | UB   | CS | Subsystem                        | Reference      | Notes                                                                                                                                                                                                                                                                                                                                                                                                             | EC Number |
|-------------|--------------------|--------------------------------------------------|---------------------------------------------------------------------------------------------------------------------------------------------------------------------------------------------------------------------------------------------------------------------------------------------------------------------------------------------------------------------------------------------------------------------------------|-----|----------------------------------------------------------------------------------------------------------------------------------------------------------------------------------------------------------------------------------------------------------------------------------------------------------------------------------------------------------------------------------------------------------------------------------------------------------------------------------------------------------------------------|----|------|----|----------------------------------|----------------|-------------------------------------------------------------------------------------------------------------------------------------------------------------------------------------------------------------------------------------------------------------------------------------------------------------------------------------------------------------------------------------------------------------------|-----------|
|             | RHAMNOGALURASEe_II | Rhamnogalacturonan II degradation, extracellular | $52 \text{ h}_2\text{o}[\text{e}] + \text{rhamnogalurII}[\text{e}] \Rightarrow 2 \text{ fuc-L}[\text{e}] + 6 \text{ arab-L}[\text{e}] + 3 \text{ gal}[\text{e}] + 8 \text{ rmn}[\text{e}] + 19 \text{ galur}[\text{e}] + 3 \text{ glcur}[\text{e}] + 2 \text{ 2omfuc}[\text{e}] + 2 \text{ 2omxyl}[\text{e}] + 2 \text{ 3ddlhept}[\text{e}] + 3 \text{ acerA}[\text{e}] + 3 \text{ apio-D}[\text{e}] + 2 \text{ kdo}[\text{e}]$ | 0   | (BT_1021 or BT_0348) and (BT_3662 or BT_3663) and BT_1011 and BT_3664 and BT_3665 and (BT_4152 or BT_0983 or BT_0992 or BT_0993 or BT_0996) and (BT_1001 or BT_1013 or BT_1019) and (BT_4146 or BT_4149 or BT_4153 or BT_4155 or BT_4183 or BT_4115 or BT_4116 or BT_1018) and (BT_4150 or BT_4173) and BT_4175 and (BT_4109 or BT_4110) and ((BT_4670 and BT_4671) or (BT_4164 and BT_4165) or (BT_4113 and BT_4114) or (BT_1028 and BT_1029) or (BT_1683 and BT_1683) or (BT_3670 and BT_3671) or (BT_1024 and BT_1025)) | 0  | 1000 | 4  | Plant Polysaccharide Degradation | PMID: 22205877 | B. thetaiotaomicron grows on rhamnogalacturonan I. I'm not sure what happens to the rare sugars included in RGII. The genes included in the GPR are upregulated during growth. Enzymes/ proteins assumed to be involved: arabinosidase, xylosidase, galactosidase, fucosidase, beta-glucosidase, galacturonidase, glucuronidase rhamnogalactorunan esterase, rhamnogalacturonan lyase, pectinesterase, susC/ SusD |           |

| SEED Rxn ID | BIGG Rxn ID | Function                                              | Formula                                          | Rev | GA                    | LB    | UB   | CS | Subsystem                   | Reference                | Notes                                                                                       | EC Number |
|-------------|-------------|-------------------------------------------------------|--------------------------------------------------|-----|-----------------------|-------|------|----|-----------------------------|--------------------------|---------------------------------------------------------------------------------------------|-----------|
|             | RIBFLVt2r   | riboflavin transport in via proton symport reversible | h[e] + ribflv[e] <=> h[c] + ribflv[c]            | 1   |                       | -1000 | 1000 | 2  | Transport, Extracellular    | PMID:9167138             | Riboflavin is synthesized by the gut bacterial flora of the colon.                          |           |
|             | RIBt2r      | ribose transport in via proton symporter, reversible  | h[e] + rib-D[e] <=> h[c] + rib-D[c]              | 1   |                       | -1000 | 1000 | 2  | Transport, Extracellular    | PMID: 17579514           | Bacteroides thetaiotaomicron grows on D-ribose.                                             |           |
| rxn01761    | RMI         | L-rhamnose isomerase                                  | rmn[c] <=> rml[c]                                | 1   | BT_3764               | -1000 | 1000 | 4  | Alternate Carbon Metabolism | PMID: 18848625           | The rhamnose utilization gene cluster was characterized.                                    | 5.3.1.14  |
| rxn02161    | RMK         | rhamnulokinase                                        | atp[c] + rml[c] => h[c] + adp[c] + rml1p[c]      | 0   | BT_3763               | 0     | 1000 | 4  | Alternate Carbon Metabolism | PMID: 18848625           | Reversible reaction in Model SEED. The rhamnose utilization gene cluster was characterized. | 2.7.1.5   |
| rxn01390    | RMK2        | Rhamnulokinase                                        | atp[c] + xylu-L[c] <=> h[c] + adp[c] + xu1p-L[c] | 1   | BT_3763               | -1000 | 1000 | 4  | Alternate Carbon Metabolism | PMID: 18848625           | The rhamnose utilization gene cluster was characterized.                                    | 2.7.1.5   |
| rxn05646    | RMNt        | L-rhamnose transport via proton symport               | h[e] + rmn[e] => h[c] + rmn[c]                   | 0   | (BT_2953 or BT_3765)  | 0     | 1000 | 4  | Alternate Carbon Metabolism | PMID: 18848625 (BT_3765) | B. thetaiotaomicron grows on L-rhamnose.                                                    |           |
| rxn01621    | RMPA        | Rhamnulose-1-phosphate aldolase                       | rml1p[c] <=> dhap[c] + lald-L[c]                 | 1   | BT_3766               | -1000 | 1000 | 4  | Alternate Carbon Metabolism | PMID: 18848625           | The rhamnose utilization gene cluster was characterized.                                    | 4.1.2.19  |
| rxn05232    | RNTR1       | ribonucleoside-triphosphate reductase (ATP)           | atp[c] + trdrd[c] => h2o[c] + trdox[c] + datp[c] | 0   | (BT_1998 and BT_1999) | 0     | 1000 | 2  | Nucleotide Salvage Pathway  |                          |                                                                                             | 1.17.4.2  |
| rxn05234    | RNTR2       | ribonucleoside-triphosphate reductase (GTP)           | gtp[c] + trdrd[c] => h2o[c] + trdox[c] + dgtp[c] | 0   | (BT_1998 and BT_1999) | 0     | 1000 | 2  | Nucleotide Salvage Pathway  |                          |                                                                                             | 1.17.4.2  |
| rxn05235    | RNTR3       | ribonucleoside-triphosphate reductase (CTP)           | trdrd[c] + ctp[c] => h2o[c] + trdox[c] + dctp[c] | 0   | (BT_1998 and BT_1999) | 0     | 1000 | 2  | Nucleotide Salvage Pathway  |                          |                                                                                             | 1.17.4.2  |
| rxn05236    | RNTR4       | ribonucleoside-triphosphate reductase (UTP)           | trdrd[c] + utp[c] => h2o[c] + trdox[c] + dudp[c] | 0   | (BT_1998 and BT_1999) | 0     | 1000 | 2  | Nucleotide Salvage Pathway  |                          |                                                                                             | 1.17.4.2  |
| rxn01116    | RPE         | ribulose 5-phosphate 3-epimerase                      | ru5p-D[c] <=> xu5p-D[c]                          | 1   | BT_3946               | -1000 | 1000 | 2  | Pentose Phosphate Pathway   |                          |                                                                                             | 5.1.3.1   |

| SEED Rxn ID | BIGG Rxn ID | Function                                                                    | Formula                                                               | Rev | GA                    | LB    | UB   | CS | Subsystem                                  | Reference | Notes                             | EC Number |
|-------------|-------------|-----------------------------------------------------------------------------|-----------------------------------------------------------------------|-----|-----------------------|-------|------|----|--------------------------------------------|-----------|-----------------------------------|-----------|
| rxn00777    | RPI         | ribose-5-phosphate isomerase                                                | r5p[c] <=> ru5p-D[c]                                                  | 1   | (BT_0346 or BT_1986)  | -1000 | 1000 | 2  | Pentose Phosphate Pathway                  |           |                                   | 5.3.1.6   |
| rxn03917    | S7PIr       | sedoheptulose 7-phosphate isomerase (reversible)                            | s7p[c] <=> gmhep7p[c]                                                 | 1   | BT_0475               | -1000 | 1000 | 2  | Lipopolysaccharide Biosynthesis            |           |                                   | 5.3.1.-   |
| rxn00379    | SADT        | sulfate adenylyltransferase                                                 | h[c] + atp[c] + so4[c] => ppi[c] + aps[c]                             | 0   | (BT_0414 and BT_0415) | 0     | 1000 | 2  | Cysteine Metabolism                        |           | Reversible reaction in Model SEED | 2.7.7.4   |
| rxn09240    | SADT2       | Sulfate adenylyltransferase                                                 | h2o[c] + atp[c] + gtp[c] + so4[c] => pi[c] + ppi[c] + aps[c] + gdp[c] | 0   | (BT_0414 and BT_0415) | 0     | 1000 | 2  | Cysteine Metabolism                        |           | Reversible reaction in Model SEED | 2.7.7.4   |
| rxn11702    | SEPHCHS     | 2-succinyl-5-enolpyruvyl-6-hydroxy-3-cyclohexene-1-carboxylic-acid synthase | h[c] + akc[c] + ichor[c] => co2[c] + 2s5epchc[c]                      | 0   | BT_4701               | 0     | 1000 | 2  | Cofactor and Prosthetic Group Biosynthesis |           |                                   | 2.2.1.9   |
| rxn00423    | SERATi      | Serine acetyltransferase (EC 2.3.1.30)                                      | accoa[c] + ser-L[c] => coa[c] + acser[c]                              | 0   | BT_3256               | 0     | 1000 | 2  | Cysteine Metabolism                        |           |                                   | 2.3.1.30  |
| rxn00165    | SERD_L      | L-serine deaminase                                                          | ser-L[c] => pyr[c] + nh4[c]                                           | 0   | BT_4678               | 0     | 1000 | 2  | Glycine, Serine, and Threonine Metabolism  |           |                                   | 4.3.1.17  |

| SEED Rxn ID | BIGG Rxn ID | Function                                                       | Formula                                                     | Rev | GA      | LB    | UB   | CS | Subsystem                                  | Reference                                                                                                                | Notes                                                                                                                                                                                                                                                                                                                                                                                                                                                                                                                       | EC Number |
|-------------|-------------|----------------------------------------------------------------|-------------------------------------------------------------|-----|---------|-------|------|----|--------------------------------------------|--------------------------------------------------------------------------------------------------------------------------|-----------------------------------------------------------------------------------------------------------------------------------------------------------------------------------------------------------------------------------------------------------------------------------------------------------------------------------------------------------------------------------------------------------------------------------------------------------------------------------------------------------------------------|-----------|
|             | SERPT       | serine C-palmitoyltransferase                                  | h[c] + pmtcoa[c] + ser-L[c] => coa[c] + 3dsphgn[c] + co2[c] | 0   | BT_0870 | 0     | 1000 | 4  | Sphingolipid Metabolism                    | PMID:16887518, PMID:20855611                                                                                             | Bacteroides are well established to produce sphingolipids. Homologs of human serine palmitoyl transferase were found in Bacteroides and related species. In B. thetaiotaomicron, BLASTP of human serine palmitoyl transferase subunit 1 returns BT_0870, 8-amino-7-oxononanoate synthase, as homolog. It is unclear if this gene really encodes SERPT. Presence of this enzyme is supported by inhibition of sphingolipid synthesis in B. fragilis if cultures are exposed to the SERPT inhibitor myriocin (PMID:20855611). | 2.3.1.50  |
| rxn05307    | SERt2r      | L-serine reversible transport via proton symport               | h[e] + ser-L[e] <=> h[c] + ser-L[c]                         | 1   |         | -1000 | 1000 | 2  | Transport, Extracellular                   | Dworkin, M. and S. Falkow (2006). The prokaryotes : a handbook on the biology of bacteria. New York ; [London], Springer | B. thetaiotaomicron is weakly proteolytic, so a transport reaction for all amino acids is assumed to be present.                                                                                                                                                                                                                                                                                                                                                                                                            |           |
| rxn11703    | SHCHCS3     | 2-succinyl-6-hydroxy-2,4-cyclohexadiene-1-carboxylate synthase | 2s5epchc[c] => pyr[c] + 2shchc[c]                           | 0   |         | 0     | 1000 | 1  | Cofactor and Prosthetic Group Biosynthesis |                                                                                                                          | Added by Model SEED during auto-completion step in pipeline.                                                                                                                                                                                                                                                                                                                                                                                                                                                                | 4.2.99.20 |

| SEED Rxn ID | BIGG Rxn ID       | Function                                       | Formula                                              | Rev | GA                            | LB    | UB   | CS | Subsystem                                          | Reference                                    | Notes                                                                                                                                    | EC Number |
|-------------|-------------------|------------------------------------------------|------------------------------------------------------|-----|-------------------------------|-------|------|----|----------------------------------------------------|----------------------------------------------|------------------------------------------------------------------------------------------------------------------------------------------|-----------|
| rxn01740    | SHK3Dr            | shikimate dehydrogenase                        | h[c] + nadph[c] + 3dhsk[c] <=> nadp[c] + skm[c]      | 1   | BT_4215                       | -1000 | 1000 | 2  | Tyrosine, Tryptophan, and Phenylalanine Metabolism |                                              |                                                                                                                                          | 1.1.1.25  |
| rxn01739    | SHKK              | shikimate kinase                               | atp[c] + skm[c] => h[c] + adp[c] + skm5p[c]          | 0   | BT_3393                       | 0     | 1000 | 2  | Tyrosine, Tryptophan, and Phenylalanine Metabolism |                                              | Reversible reaction in Model SEED                                                                                                        | 2.7.1.71  |
|             | SHSL2r            | O-succinylhomoserine lyase (H2S)               | h2s[c] + suchms[c] <=> h[c] + hcys-L[c] + succ[c]    | 1   | (BT_1923 or BT_2387)          | -1000 | 1000 | 2  | Methionine Metabolism                              |                                              |                                                                                                                                          | 4.2.99.9  |
|             | SIAASE_OGLYC AN1e | Sialidase, mucin-type O-glycans, extracellular | h2o[e] + sTn_antigen[e] => acnam[e] + Tn_antigen[e]  | 0   | BT_0455 or BT_2194 or BT_2892 | 0     | 1000 | 4  | O-Glycan Degradation                               | PMID: 18996345, PMID: 10430883, PMID: 848954 | B. thetaiotaomicron is well known to degrade mucin. The subsystem "O-Glycan Biosynthesis" in Recon1 represents mucin biosynthesis.       |           |
|             | SIAASE_OGLYC AN2e | Sialidase, mucin-type O-glycans, extracellular | h2o[e] + dsT_antigen[e] => acnam[e] + sT_antigen[e]  | 0   | BT_0455 or BT_2194 or BT_2892 | 0     | 1000 | 4  | O-Glycan Degradation                               | PMID: 18996345, PMID: 10430883, PMID: 848954 | B. thetaiotaomicron is well known to degrade mucin. The subsystem "O-Glycan Biosynthesis" in Recon1 represents mucin biosynthesis.       |           |
|             | SIAASE_OGLYC AN3e | Sialidase, mucin-type O-glycans, extracellular | h2o[e] + sT_antigen[e] => acnam[e] + T_antigen[e]    | 0   | BT_0455 or BT_2194 or BT_2892 | 0     | 1000 | 4  | O-Glycan Degradation                               | PMID: 18996345, PMID: 10430883, PMID: 848954 | B. thetaiotaomicron is well known to degrade mucin. The subsystem "O-Glycan Biosynthesis" in Recon1 represents mucin biosynthesis.       |           |
|             | SIAASEe           | sialidase, extracellular                       | 2 h2o[c] + s2l2n2m2mn[e] => 2 acnam[e] + l2n2m2mn[e] | 0   | BT_0455 or BT_2194 or BT_2892 | 0     | 1000 | 4  | N-Glycan Degradation                               | PMID:7463468, PMID:15790854, PMID:19304853   | B. thetaiotaomicron has sialidase activity. However, it does not grow on N-acetyl neuraminic acid as sole carbon source (PMID:19304853). | 3.2.1.18  |
|             | sink_chols        | sink_reaction_choline sulfate                  | chols[c] <=>                                         | 1   |                               | -1000 | 1000 | 0  | exchange/dem and reaction                          |                                              |                                                                                                                                          |           |
|             | sink_s            | sink_reaction_sulfur[c]                        | s[c] <=>                                             | 1   |                               | -1000 | 1000 | 0  | exchange/dem and reaction                          |                                              |                                                                                                                                          |           |

| SEED Rxn ID | BIGG Rxn ID | Function                                           | Formula                                                                 | Rev | GA                                         | LB    | UB   | CS | Subsystem                              | Reference                                                                            | Notes                                                                                                                                                                                                                            | EC Number |
|-------------|-------------|----------------------------------------------------|-------------------------------------------------------------------------|-----|--------------------------------------------|-------|------|----|----------------------------------------|--------------------------------------------------------------------------------------|----------------------------------------------------------------------------------------------------------------------------------------------------------------------------------------------------------------------------------|-----------|
| rxn05651    | SO4t2       | sulfate transport in via proton symport            | $h[e] + so4[e] \rightleftharpoons h[c] + so4[c]$                        | 1   | (BT_0412 or BT_3181)                       | -1000 | 1000 | 2  | Transport, Extracellular               |                                                                                      |                                                                                                                                                                                                                                  |           |
|             | SPHMYLN_BTt | Sphingomyelin (B.thetaiotaomicron specific) export | $sphmyln\_bt[c] \rightleftharpoons sphmyln\_bt[e]$                      | 1   |                                            | -1000 | 1000 | 2  | Sphingolipid Metabolism                | PMID:16887518, PMID:20855611, Anaerobe (2001) 07, 103?112 doi:10.1006/anae.2001.0376 | Bacteroides species are well established to produce sphingolipids.                                                                                                                                                               |           |
| rxn05175    | SPMDabc     | spermidine transport via ABC system                | $h2o[c] + atp[c] + spmd[e] \Rightarrow h[c] + pi[c] + adp[c] + spmd[c]$ | 0   | (BT_1288 or BT_1289 or BT_1290 or BT_1291) | 0     | 1000 | 2  | Transport, Extracellular               |                                                                                      |                                                                                                                                                                                                                                  |           |
| rxn09264    | SPMDAT1     | Spermidine acetyltransferase                       | $accoa[c] + spmd[c] \Rightarrow h[c] + coa[c] + N1aspm[d][c]$           | 0   | BT_1079                                    | 0     | 1000 | 2  | Spermidine and Putrescine Biosynthesis |                                                                                      |                                                                                                                                                                                                                                  | 2.3.1.57  |
| rxn09265    | SPMDAT2     | Spermidine acetyltransferase (N8)                  | $accoa[c] + spmd[c] \Rightarrow h[c] + coa[c] + n8aspm[d][c]$           | 0   | BT_1079                                    | 0     | 1000 | 2  | Spermidine and Putrescine Biosynthesis |                                                                                      |                                                                                                                                                                                                                                  | 2.3.1.57  |
|             | SPMDtex2    | spermidine excretion (cytosol to extracellular)    | $spmd[c] \Rightarrow spmd[e]$                                           | 0   |                                            | 0     | 1000 | 2  | Transport, Extracellular               | PMID:10801923                                                                        | B. thetaiotaomicron secretes putrescine and spermidine.                                                                                                                                                                          |           |
| rxn00206    | SPODM       | superoxide dismutase                               | $2 h[c] + 2 o2s[c] \Rightarrow o2[c] + h2o2[c]$                         | 0   | BT_0655                                    | 0     | 1000 | 4  | ROS Detoxification                     | PMID:3700336, PMID:18398604                                                          | Superoxide dismutase activity was demonstrated in B. thetaiotaomicron.                                                                                                                                                           | 1.15.1.1  |
| rxn05459    | STCOATA     | stearyl-ACP[acyl-carrier-protein] transferase      | $coa[c] + ocdcaACP[c] \rightleftharpoons ACP[c] + stcoa[c]$             | 1   | BT_0789                                    | -1000 | 1000 | 3  | Glycerophospholipid Metabolism         | PMID: 6102980, PMID: 7440508, PMID: 7204330                                          | Added manually to BIGG database based on reaction mechanism proposed by Model SEED. This reaction is involved in fatty acid biosynthesis. B. thetaiotaomicron is well known to synthesize iso- and anteiso-branched fatty acids. | 2.3.1.180 |
|             | STYSabc     | stachyose transport via ABC system (import)        | $h2o[c] + atp[c] + stys[e] \Rightarrow h[c] + pi[c] + adp[c] + stys[c]$ | 0   |                                            | 0     | 1000 | 2  | Transport, Extracellular               | PMID:2557798                                                                         | B. thetaiotaomicron can utilize stachyose as carbon source.                                                                                                                                                                      |           |

| SEED Rxn ID | BIGG Rxn ID | Function                                            | Formula                                                   | Rev | GA                                                               | LB    | UB   | CS | Subsystem                                  | Reference                                   | Notes                                                                                                                                                                                                       | EC Number |
|-------------|-------------|-----------------------------------------------------|-----------------------------------------------------------|-----|------------------------------------------------------------------|-------|------|----|--------------------------------------------|---------------------------------------------|-------------------------------------------------------------------------------------------------------------------------------------------------------------------------------------------------------------|-----------|
| rxn02596    | STYSGH      | a-galactosidase (stachyose)                         | h2o[c] + stys[c] <=> gal[c] + raffin[c]                   | 1   | (BT_1871 or BT_2851 or BT_3065 or BT_3131 or BT_3133 or BT_3410) | -1000 | 1000 | 4  | Plant Polysaccharide Degradation           | PMID:19646996, PMID:18848471, PMID:2557798  | B. thetaiotaomicron can utilize stachyose as carbon source.                                                                                                                                                 | 3.2.1.22  |
| rxn02831    | SUCBZL      | o-succinylbenzoate-CoA ligase                       | coa[c] + atp[c] + sucbz[c] => amp[c] + ppi[c] + sbzcoa[c] | 0   | BT_4704                                                          | 0     | 1000 | 2  | Cofactor and Prosthetic Group Biosynthesis |                                             |                                                                                                                                                                                                             | 6.2.1.26  |
| rxn02832    | SUCBZS      | O-succinylbenzoate-CoA synthase                     | 2shhc[c] => h2o[c] + sucbz[c]                             | 0   | BT_4703                                                          | 0     | 1000 | 2  | Cofactor and Prosthetic Group Biosynthesis |                                             | Model SEED annotation, not confirmed by NCBI gene                                                                                                                                                           | 4.2.1.-   |
|             | SUCCITRDSs  | N-succinyl-L-citrulline desuccinylase (spontaneous) | h2o[c] + succitr-L[c] => h[c] + citr-L[c] + succ[c]       | 0   |                                                                  | 0     | 1000 | 1  | Arginine and Proline Metabolism            |                                             | Reaction for modeling purposes only, added manually to fill gap in arginine biosynthesis                                                                                                                    |           |
| rxn05654    | SUCCt2r     | succinate transport via proton symport              | h[e] + succ[e] <=> h[c] + succ[c]                         | 1   | BT_2756                                                          | -1000 | 1000 | 4  | Transport, Extracellular                   | PMID:19321416, PMID:12740060, PMID:11880608 | Bacteroides species are well established to produce succinate. Also, growth of B. fragilis is stimulated by uptake of succinate in heme-resitricted culture (PMID:11880608). Annotation based on NCBI Gene. |           |
| rxn00288    | SUCD1       | succinate dehydrogenase                             | succ[c] + fad[c] <=> fum[c] + fadh2[c]                    | 1   | (BT_3054 and BT_3055)                                            | -1000 | 1000 | 4  | TCA Cycle                                  | PMID:12777495, PMID:11260473                | Bacteroides have both succinate dehydrogenase and fumarate reductase activity. Fumarate reductase is a key enzyme in central metabolism.                                                                    | 1.3.99.1  |
| rxn09272    | SUCDi       | succinate dehydrogenase (irreversible)              | succ[c] + q8[c] => fum[c] + q8h2[c]                       | 0   | (BT_3054 and BT_3055)                                            | 0     | 1000 | 4  | TCA Cycle                                  | PMID:12777495, PMID:11260473                | Bacteroides have both succinate dehydrogenase and fumarate reductase acitivity. Fumarate reductase is a key enzyme in central metabolism.                                                                   | 1.3.99.1  |

| SEED Rxn ID | BIGG Rxn ID | Function                                | Formula                                                  | Rev | GA                    | LB    | UB   | CS | Subsystem                        | Reference                                                                                                                            | Notes                                                                                                                                                                                      | EC Number |
|-------------|-------------|-----------------------------------------|----------------------------------------------------------|-----|-----------------------|-------|------|----|----------------------------------|--------------------------------------------------------------------------------------------------------------------------------------|--------------------------------------------------------------------------------------------------------------------------------------------------------------------------------------------|-----------|
| rxn00285    | SUCOAS      | succinyl-CoA synthetase (ADP-forming)   | coa[c] + atp[c] + succ[c] <=> pi[c] + adp[c] + succoa[c] | 1   | (BT_0787 and BT_0788) | -1000 | 1000 | 2  | TCA Cycle                        |                                                                                                                                      |                                                                                                                                                                                            | 6.2.1.5   |
|             | SUCORNTC    | N-succinyl-L-ornithine transcarbamylase | cbp[c] + sucorn[c] => pi[c] + succitr-L[c]               | 0   | BT_3717               | 0     | 1000 | 4  | Arginine and Proline Metabolism  | PMID:16704984                                                                                                                        | The reaction mechanism of this enzyme was demonstrated in <i>Bacteroides fragilis</i> .                                                                                                    | 2.1.3.11  |
| rxn00577    | SUCR        | sucrose hydrolyzing enzyme              | h2o[c] + sucr[c] => glc-D[c] + fru[c]                    | 0   | BT_1765               | 0     | 1000 | 4  | Plant Polysaccharide Degradation | PMID:20603004                                                                                                                        | <i>B. thetaiotaomicron</i> can utilize sucrose as carbon source.                                                                                                                           | 3.2.1.26  |
|             | SUCRt2      | sucrose transport in via proton symport | h[e] + sucr[e] => h[c] + sucr[c]                         | 0   |                       | 0     | 1000 | 2  | Transport, Extracellular         | PMID:20603004                                                                                                                        | <i>B. thetaiotaomicron</i> can utilize sucrose as carbon source.                                                                                                                           |           |
|             | T2DECAI     | trans-2-decenoyl-ACP isomerase          | tdec2eACP[c] <=> cdec3eACP[c]                            | 1   |                       | -1000 | 1000 | 2  | Cell Envelope Biosynthesis       | PMID:6102980                                                                                                                         | This reaction is carried out by FabA. <i>B. thetaiotaomicron</i> does not have this enzyme. However, production of monounsaturated fatty acids in <i>B. thetaiotaomicron</i> is confirmed. |           |
| rxn01857    | TAGURr      | tagaturonate reductase                  | nad[c] + altrn[c] <=> h[c] + nadh[c] + tagur[c]          | 1   | BT_0825               | -1000 | 1000 | 2  | Alternate Carbon Metabolism      |                                                                                                                                      |                                                                                                                                                                                            | 1.1.1.58  |
| rxn01333    | TALA        | transaldolase                           | g3p[c] + s7p[c] <=> e4p[c] + f6p[c]                      | 1   | BT_1658               | -1000 | 1000 | 2  | Pentose Phosphate Pathway        |                                                                                                                                      |                                                                                                                                                                                            | 2.2.1.2   |
|             | TAURtex2    | taurine transport via diffusion         | taur[e] <=> taur[c]                                      | 1   |                       | -1000 | 1000 | 1  | Transport, Extracellular         | PMID: 14665678                                                                                                                       | Diffusion through a porine assumed due to metabolites small size.                                                                                                                          |           |
|             | TCHOLAH     | Bile acid hydrolase (taurocholate)      | h2o[c] + tchola[c] => h[c] + cholate[c] + taur[c]        | 0   | (BT_1259 or BT_2086)  | 0     | 1000 | 4  | Bile Acid Metabolism             | PMID:10993, Dworkin, M. and S. Falkow (2006). The prokaryotes : a handbook on the biology of bacteria. New York ; [London], Springer | This enzyme was demonstrated in <i>B. thetaiotaomicron</i> (PMID:10993). Growth is stimulated by 20 % bile (textbook The Prokaryotes).                                                     | 3.5.1.24  |

| SEED Rxn ID | BIGG Rxn ID | Function                                            | Formula                                                  | Rev | GA                                         | LB    | UB   | CS | Subsystem                            | Reference                                   | Notes                                                                                                                                                                                                                            | EC Number |
|-------------|-------------|-----------------------------------------------------|----------------------------------------------------------|-----|--------------------------------------------|-------|------|----|--------------------------------------|---------------------------------------------|----------------------------------------------------------------------------------------------------------------------------------------------------------------------------------------------------------------------------------|-----------|
|             | TCHOLAt2    | taurocholate transport via sodium cotransport       | 2 na1[e] + tchola[e] => 2 na1[c] + tchola[c]             | 0   |                                            | 0     | 1000 | 2  | Transport, Extracellular             | PMID:10993                                  | B. thetaiotaomicron metabolizes glycocholate and taurocholate. A bile acid/ sodium symporter is annotated for Bacteroides salanitronis (NCBI Gene, last updated 18.05.11).                                                       |           |
| rxn05457    | TDCOATA     | tetradecanoyl-ACP[acyl-carrier-protein] transferase | coa[c] + myrsACP[c] <=> ACP[c] + tdcoa[c]                | 1   | BT_0789                                    | -1000 | 1000 | 3  | Glycerophospholipid Metabolism       | PMID: 6102980, PMID: 7440508, PMID: 7204330 | Added manually to BIGG database based on reaction mechanism proposed by Model SEED. This reaction is involved in fatty acid biosynthesis. B. thetaiotaomicron is well known to synthesize iso- and anteiso-branched fatty acids. | 2.3.1.180 |
| rxn02000    | TDPDRE      | dTDP-4-dehydrorhamnose 3,5-epimerase                | dt dp4d6dg[c] => dt dp4d6dm[c]                           | 0   | (BT_0464 or BT_0828 or BT_1349 or BT_1338) | 0     | 1000 | 2  | Capsular Polysaccharide Biosynthesis |                                             | Reversible reaction in Model SEED                                                                                                                                                                                                | 5.1.3.13  |
| rxn02003    | TDPDRR      | dTDP-4-dehydrorhamnose reductase                    | h[c] + nadph[c] + dt dp4d6dm[c] => nadp[c] + dt dprmn[c] | 0   | (BT_0725 or BT_0465 or BT_1730)            | 0     | 1000 | 2  | Capsular Polysaccharide Biosynthesis |                                             | Reversible reaction in Model SEED                                                                                                                                                                                                | 1.1.1.133 |
| rxn01997    | TDPGDH      | dTDPglucose 4,6-dehydratase                         | dt dpglu[c] => h2o[c] + dt dp4d6dg[c]                    | 0   | (BT_0466 or BT_1350 or BT_2016 or BT_2880) | 0     | 1000 | 2  | Capsular Polysaccharide Biosynthesis |                                             |                                                                                                                                                                                                                                  | 4.2.1.46  |

| SEED Rxn ID | BIGG Rxn ID | Function                                  | Formula                                                 | Rev | GA                                                    | LB    | UB   | CS | Subsystem                       | Reference                                   | Notes                                                                                                                                                                                                                                                      | EC Number |
|-------------|-------------|-------------------------------------------|---------------------------------------------------------|-----|-------------------------------------------------------|-------|------|----|---------------------------------|---------------------------------------------|------------------------------------------------------------------------------------------------------------------------------------------------------------------------------------------------------------------------------------------------------------|-----------|
| rxn03181    | TDSK_BT     | Tetraacyldisaccharide 4'kinase            | atp[c] + lipidAds_bt[c] => h[c] + adp[c] + lipidA_bt[c] | 0   | BT_1880                                               | 0     | 1000 | 3  | Lipopolysaccharide Biosynthesis | PMID:18931137, PMID:19460428, PMID:20974832 | Based on H. pylori LPS biosynthesis (BIGG database), as in the P. gingivalis reconstruction (PMID:18931137). P. gingivalis' LPS is similar in structure to the Bacteroides LPS. Based on structural information taken from (PMID:19460428, PMID:20974832). | 2.7.1.130 |
| rxn00787    | TGBPA       | Tagatose-bisphosphate aldolase            | tagdp-D[c] <=> dhap[c] + g3p[c]                         | 1   |                                                       | -1000 | 1000 | 2  | Alternate Carbon Metabolism     | PMID:2845859, PMID:10931310                 | B. thetaiotaomicron grows on N-acetyl-galactosamine (PMID:2845859), but the utilization pathway is poorly studied. In E. coli, this enzyme is involved in GalNAc utilization (PMID:10931310).                                                              | 4.1.2.40  |
| rxn09296    | THIORDXi    | hydrogen peroxide reductase (thioredoxin) | trdrd[c] + h2o2[c] => 2 h2o[c] + trdox[c]               | 0   | (BT_0218 or BT_0677 or BT_1456 or BT_1914 or BT_2229) | 0     | 1000 | 2  | ROS Detoxification              |                                             |                                                                                                                                                                                                                                                            |           |
|             | THMDP       | thiamin diphosphatase                     | 2 h2o[c] + thmpp[c] => h[c] + 2 pi[c] + thm[c]          | 0   | BT_3017                                               | 0     | 1000 | 2  | Thiamine Metabolism             |                                             | The enzyme is an acid phosphatase with wide specificity. Added based on annotation from The SEED Viewer (last checked 01.07.11)                                                                                                                            | 3.1.3.2   |
| rxn05200    | THMDt2      | thymidine transport in via proton symport | h[e] + thymd[e] => h[c] + thymd[c]                      | 0   | BT_4330                                               | 0     | 1000 | 2  | Transport, Extracellular        |                                             | Reversible reaction in Model SEED                                                                                                                                                                                                                          |           |
| rxn09657    | THMt3       | Thiamine transport in via proton antiport | h[c] + thm[e] <=> h[e] + thm[c]                         | 1   | BT_2396                                               | -1000 | 1000 | 2  | Transport, Extracellular        |                                             |                                                                                                                                                                                                                                                            |           |

| SEED Rxn ID | BIGG Rxn ID | Function                                            | Formula                                                                                                               | Rev | GA                                                                                               | LB    | UB   | CS | Subsystem                                  | Reference                                                                                                                | Notes                                                                                                            | EC Number |
|-------------|-------------|-----------------------------------------------------|-----------------------------------------------------------------------------------------------------------------------|-----|--------------------------------------------------------------------------------------------------|-------|------|----|--------------------------------------------|--------------------------------------------------------------------------------------------------------------------------|------------------------------------------------------------------------------------------------------------------|-----------|
| rxn00541    | THRAr       | Threonine Aldolase                                  | thr-L[c] <=> acald[c] + gly[c]                                                                                        | 1   | BT_1815                                                                                          | -1000 | 1000 | 2  | Glycine, Serine, and Threonine Metabolism  |                                                                                                                          |                                                                                                                  | 4.1.2.5   |
| rxn01068    | THRD        | L-threonine dehydrogenase                           | nad[c] + thr-L[c] => h[c] + nadh[c] + 2aobut[c]                                                                       | 0   | BT_1370                                                                                          | 0     | 1000 | 2  | Glycine, Serine, and Threonine Metabolism  |                                                                                                                          |                                                                                                                  | 1.1.1.103 |
| rxn01069    | THRS        | threonine synthase                                  | h2o[c] + phom[c] => pi[c] + thr-L[c]                                                                                  | 0   | BT_2401                                                                                          | 0     | 1000 | 2  | Glycine, Serine, and Threonine Metabolism  |                                                                                                                          |                                                                                                                  | 4.2.3.1   |
|             | THRt2r      | L-threonine reversible transport via proton symport | h[e] + thr-L[e] <=> h[c] + thr-L[c]                                                                                   | 1   |                                                                                                  | -1000 | 1000 | 1  | Transport, Extracellular                   | Dworkin, M. and S. Falkow (2006). The prokaryotes : a handbook on the biology of bacteria. New York ; [London], Springer | B. thetaiotaomicron is weakly proteolytic, so a transport reaction for all amino acids is assumed to be present. |           |
| rxn09310    | THZPSN      | thiazole phosphate synthesis                        | atp[c] + cys-L[c] + tyr-L[c] + dxyl5p[c] => h2o[c] + h[c] + ala-L[c] + co2[c] + amp[c] + ppi[c] + 4hba[c] + 4mpetz[c] | 0   | ((BT_0648 and BT_0651 and BT_0653 and BT_0649) or (BT_0648 and BT_0651 and BT_0653 and BT_1836)) | 0     | 1000 | 2  | Cofactor and Prosthetic Group Biosynthesis |                                                                                                                          |                                                                                                                  |           |
| rxn01200    | TKT1        | transketolase                                       | r5p[c] + xu5p-D[c] <=> g3p[c] + s7p[c]                                                                                | 1   | BT_0347                                                                                          | -1000 | 1000 | 2  | Pentose Phosphate Pathway                  |                                                                                                                          |                                                                                                                  | 2.2.1.1   |
| rxn00785    | TKT2        | transketolase                                       | e4p[c] + xu5p-D[c] <=> g3p[c] + f6p[c]                                                                                | 1   | BT_0347                                                                                          | -1000 | 1000 | 2  | Pentose Phosphate Pathway                  |                                                                                                                          |                                                                                                                  | 2.2.1.1   |
| rxn01143    | TMDK1       | thymidine kinase (ATP:thymidine)                    | atp[c] + thymd[c] => h[c] + adp[c] + dtmp[c]                                                                          | 0   | BT_2275                                                                                          | 0     | 1000 | 2  | Nucleotide Salvage Pathway                 |                                                                                                                          | Reversible reaction in Model SEED                                                                                | 2.7.1.21  |
| rxn00440    | TMDPK       | Thiamin pyrophosphokinase (EC 2.7.6.2)              | atp[c] + thm[c] => h[c] + amp[c] + thmpp[c]                                                                           | 0   | BT_2397                                                                                          | 0     | 1000 | 2  | Thiamine Metabolism                        |                                                                                                                          | Reversible reaction in Model SEED                                                                                | 2.7.6.2   |
| rxn01520    | TMDS        | thymidylate synthase                                | dump[c] + mlthf[c] => dhf[c] + dtmp[c]                                                                                | 0   | BT_2047                                                                                          | 0     | 1000 | 2  | Nucleotide Salvage Pathway                 |                                                                                                                          |                                                                                                                  | 2.1.1.45  |

| SEED Rxn ID | BIGG Rxn ID        | Function                                       | Formula                                           | Rev | GA                    | LB    | UB   | CS | Subsystem                                          | Reference                                                                                                                            | Notes                                                                                                               | EC Number |
|-------------|--------------------|------------------------------------------------|---------------------------------------------------|-----|-----------------------|-------|------|----|----------------------------------------------------|--------------------------------------------------------------------------------------------------------------------------------------|---------------------------------------------------------------------------------------------------------------------|-----------|
| rxn00438    | TMPK <sub>r</sub>  | thiamine-phosphate kinase                      | atp[c] + thmmp[c] <=> adp[c] + thmpp[c]           | 1   | BT_1882               | -1000 | 1000 | 2  | Thiamine Metabolism                                |                                                                                                                                      |                                                                                                                     | 2.7.4.16  |
| rxn02305    | TMPPP              | thiamine-phosphate diphosphorylase             | h[c] + 2mahmp[c] + 4mpetz[c] => ppi[c] + thmmp[c] | 0   | (BT_0652 or BT_0647)  | 0     | 1000 | 2  | Cofactor and Prosthetic Group Biosynthesis         |                                                                                                                                      | BT_0647: evidence at protein level (PDB entry 3ceu)                                                                 | 2.5.1.3   |
| rxn00747    | TPI                | triose-phosphate isomerase                     | dhap[c] <=> g3p[c]                                | 1   | BT_3929               | -1000 | 1000 | 2  | Glycolysis/Gluconeogenesis                         |                                                                                                                                      |                                                                                                                     | 5.3.1.1   |
| rxn05289    | TRDR <sub>r</sub>  | Thioredoxin reductase                          | h[c] + nadph[c] + trdox[c] <=> nadp[c] + trdrd[c] | 1   | BT_4336               | -1000 | 1000 | 2  | Unassigned                                         |                                                                                                                                      |                                                                                                                     | 1.8.1.9   |
|             | TREHe              | alpha,alpha-trehalase                          | h2o[e] + tre[e] => 2 glc-D[e]                     | 0   |                       | 0     | 1000 | 2  | Alternate Carbon Metabolism                        | PMID:10993, Dworkin, M. and S. Falkow (2006). The prokaryotes : a handbook on the biology of bacteria. New York ; [London], Springer | B. thetaiotaomicron grows on trehalose. The reaction may be carried out by another enzyme, no annotation available. | 3.2.1.28  |
| rxn00473    | TRPAS2             | Tryptophanase (L-tryptophan)                   | h2o[c] + trp-L[c] <=> pyr[c] + nh4[c] + indole[c] | 1   | BT_1492               | -1000 | 1000 | 2  | Tyrosine, Tryptophan, and Phenylalanine Metabolism |                                                                                                                                      | Irreversible in Model SEED                                                                                          | 4.1.99.1  |
| rxn01964    | TRPS1              | tryptophan synthase (indoleglycerol phosphate) | ser-L[c] + 3ig3p[c] => h2o[c] + trp-L[c] + g3p[c] | 0   | (BT_0527 and BT_0533) | 0     | 1000 | 2  | Tyrosine, Tryptophan, and Phenylalanine Metabolism |                                                                                                                                      |                                                                                                                     | 4.2.1.20  |
| rxn00474    | TRPS2              | tryptophan synthase (indole)                   | ser-L[c] + indole[c] => h2o[c] + trp-L[c]         | 0   | (BT_0533 and BT_0527) | 0     | 1000 | 2  | Tyrosine, Tryptophan, and Phenylalanine Metabolism |                                                                                                                                      |                                                                                                                     | 4.2.1.20  |
| rxn01682    | TRPS3 <sub>r</sub> | (1S,2R)-1-C-(indol-3-yl)glycerol 3-phosphate   | 3ig3p[c] <=> g3p[c] + indole[c]                   | 1   | (BT_0527 and BT_0533) | -1000 | 1000 | 2  | Tyrosine, Tryptophan, and Phenylalanine Metabolism |                                                                                                                                      |                                                                                                                     | 4.2.1.20  |

| SEED Rxn ID | BIGG Rxn ID | Function                                             | Formula                                                      | Rev | GA                   | LB    | UB   | CS | Subsystem                                          | Reference                                                                                                                | Notes                                                                                                                                                                                                                                                      | EC Number |
|-------------|-------------|------------------------------------------------------|--------------------------------------------------------------|-----|----------------------|-------|------|----|----------------------------------------------------|--------------------------------------------------------------------------------------------------------------------------|------------------------------------------------------------------------------------------------------------------------------------------------------------------------------------------------------------------------------------------------------------|-----------|
| rxn05663    | TRPt2r      | L-tryptophan reversible transport via proton symport | h[e] + trp-L[e]<br><=> h[c] + trp-L[c]                       | 1   |                      | -1000 | 1000 | 1  | Transport, Extracellular                           | Dworkin, M. and S. Falkow (2006). The prokaryotes : a handbook on the biology of bacteria. New York ; [London], Springer | B. thetaiotaomicron is weakly proteolytic, so a transport reaction for all amino acid is assumed to be present.                                                                                                                                            |           |
| rxn05301    | TYRt2r      | L-tyrosine reversible transport via proton symport   | h[e] + tyr-L[e]<br><=> h[c] + tyr-L[c]                       | 1   |                      | -1000 | 1000 | 1  | Transport, Extracellular                           | Dworkin, M. and S. Falkow (2006). The prokaryotes : a handbook on the biology of bacteria. New York ; [London], Springer | B. thetaiotaomicron is weakly proteolytic, so a transport reaction for all amino acids is assumed to be present.                                                                                                                                           |           |
| rxn00527    | TYRTA       | tyrosine transaminase                                | akg[c] + tyr-L[c]<br><=> glu-L[c] + 34hpp[c]                 | 1   | (BT_0202 or BT_3935) | -1000 | 1000 | 2  | Tyrosine, Tryptophan, and Phenylalanine Metabolism |                                                                                                                          |                                                                                                                                                                                                                                                            | 2.6.1.5   |
|             | U23GAAT_BT  | UDP-3-O-(anteiso-C17)glycosamine acyltransferase     | 15m3hpalmACP[c] + u3hga_HP[c] => h[c] + ACP[c] + u23ga_bt[c] | 0   | BT_4207              | 0     | 1000 | 4  | Lipopolysaccharide Biosynthesis                    | PMID:18931137, PMID:19460428, PMID:20974832                                                                              | Based on H. pylori LPS biosynthesis (BIGG database), as in the P. gingivalis reconstruction (PMID:18931137). P. gingivalis' LPS is similar in structure to the Bacteroides LPS. Based on structural information taken from (PMID:19460428, PMID:20974832). |           |

| SEED Rxn ID | BIGG Rxn ID | Function                                                                                        | Formula                                                                      | Rev | GA                                                  | LB    | UB   | CS | Subsystem                                  | Reference                                         | Notes                                                                                                                                                                                                                                                                                             | EC Number |
|-------------|-------------|-------------------------------------------------------------------------------------------------|------------------------------------------------------------------------------|-----|-----------------------------------------------------|-------|------|----|--------------------------------------------|---------------------------------------------------|---------------------------------------------------------------------------------------------------------------------------------------------------------------------------------------------------------------------------------------------------------------------------------------------------|-----------|
|             | U2GAAT_BT   | u2gaat                                                                                          | 3hpalmACP[c] +<br>ugam[c] =><br>ACP[c] +<br>u2hga_bt[c]                      | 0   |                                                     | 0     | 1000 | 2  | Lipopolysacch<br>aride<br>Biosynthesis     | PMID:18931137,<br>PMID:19460428,<br>PMID:20974832 | Based on H. pylori<br>LPS biosynthesis<br>(BIGG database), as<br>in the P. gingivalis<br>reconstruction<br>(PMID:18931137). P.<br>gingivalis' LPS is<br>similar in structure to<br>the Bacteroides LPS.<br>Based on structural<br>information taken<br>from<br>(PMID:19460428,<br>PMID:20974832). |           |
|             | U2GAAT2_BT  | u2gaat2                                                                                         | 15m3hpalmACP[<br>c] + u2hga_bt[c]<br>=> ACP[c] +<br>u2ga_bt[c]               | 0   |                                                     | 0     | 1000 | 2  | Lipopolysacch<br>aride<br>Biosynthesis     | PMID:18931137,<br>PMID:19460428,<br>PMID:20974832 | Based on H. pylori<br>LPS biosynthesis<br>(BIGG database), as<br>in the P. gingivalis<br>reconstruction<br>(PMID:18931137). P.<br>gingivalis' LPS is<br>similar in structure to<br>the Bacteroides LPS.<br>Based on structural<br>information taken<br>from<br>(PMID:19460428,<br>PMID:20974832). |           |
| rxn02011    | UAAGDS      | UDP-N-<br>acetylmuramoyl-L-<br>alanyl-D-glutamyl-<br>meso-2,6-<br>diaminopimelate<br>synthetase | atp[c] + 26dap-<br>M[c] + uamag[c]<br>=> h[c] + pi[c] +<br>adp[c] + ugmd[c]  | 0   | BT_3452                                             | 0     | 1000 | 2  | Cell Envelope<br>Biosynthesis              |                                                   |                                                                                                                                                                                                                                                                                                   | 6.3.2.13  |
| rxn02377    | UACMAMO     | UDP-N-acetyl-D-<br>mannosamine<br>oxidoreductase                                                | h2o[c] + 2 nad[c]<br>+ uacmam[c] =><br>3 h[c] + 2<br>nadh[c] +<br>uacmamu[c] | 0   | BT_0602                                             | 0     | 1000 | 2  | Capsular<br>Polysaccharide<br>Biosynthesis | PMID:17579514                                     | Annotation taken<br>from<br>PMID:17579514,<br>Table S5                                                                                                                                                                                                                                            |           |
| rxn00297    | UAG2E       | UDP-N-<br>acetylglucosamine 2-<br>epimerase                                                     | uacgam[c] <=><br>uacmam[c]                                                   | 1   | (BT_0383 or<br>BT_1203 or<br>BT_0601 or<br>BT_2944) | -1000 | 1000 | 2  | Aminosugar<br>Metabolism                   |                                                   |                                                                                                                                                                                                                                                                                                   | 5.1.3.14  |

| SEED Rxn ID | BIGG Rxn ID | Function                                            | Formula                                           | Rev | GA                                         | LB    | UB   | CS | Subsystem                       | Reference                                   | Notes                                                                                                                                                                                                                                                     | EC Number |
|-------------|-------------|-----------------------------------------------------|---------------------------------------------------|-----|--------------------------------------------|-------|------|----|---------------------------------|---------------------------------------------|-----------------------------------------------------------------------------------------------------------------------------------------------------------------------------------------------------------------------------------------------------------|-----------|
| rxn00292    | UAG2EMA     | UDP-N-acetyl-D-glucosamine 2-epimerase (Hydrolysis) | h2o[c] + uacgam[c] <=> h[c] + acmana[c] + udp[c]  | 1   | (BT_0383 or BT_1203 or BT_0601 or BT_2944) | -1000 | 1000 | 2  | Aminosugar Metabolism           |                                             |                                                                                                                                                                                                                                                           | 5.1.3.14  |
| rxn00295    | UAG4E       | UDP-N-acetyl-D-glucosamine 4-epimerase              | uacgam[c] <=> udpacgal[c]                         | 1   | (BT_0623 or BT_2887)                       | -1000 | 1000 | 2  | Aminosugar Metabolism           |                                             |                                                                                                                                                                                                                                                           | 5.1.3.7   |
|             | UAGAAT_HP   | UDP-N-acetylglucosamine acyltransferase             | 3hpalmACP[c] + uacgam[c] <=> ACP[c] + u3aga_HP[c] | 1   | (BT_3336 or BT_4205)                       | -1000 | 1000 | 4  | Lipopolysaccharide Biosynthesis | PMID:18931137, PMID:19460428, PMID:20974832 | Based on H. pylori LPS biosynthesis (BIGG database), as in the P. gingivalis reconstruction (PMID:18931137). P. gingivalis LPS is similar in structure to the Bacteroides LPS. Based on structural information taken from (PMID:19460428, PMID:20974832). |           |
| rxn00461    | UAGCVT_r    | UDP-N-acetylglucosamine 1-carboxyvinyltransferase   | uacgam[c] + pep[c] <=> pi[c] + uaccg[c]           | 1   | BT_2005                                    | -1000 | 1000 | 2  | Aminosugar Metabolism           |                                             |                                                                                                                                                                                                                                                           | 2.5.1.7   |
| rxn00293    | UAGDP       | UDP-N-acetylglucosamine diphosphorylase             | h[c] + acgam1p[c] + utp[c] => uacgam[c] + ppi[c]  | 0   |                                            | 0     | 1000 | 1  | Aminosugar Metabolism           | PMID:7240086                                | Manually filled in based on KEGG Pathway to to make N-acetylglucosamine, a substrate known to support growth, usable.                                                                                                                                     | 2.7.7.23  |
|             | UAGDP2      | UDP-glucosamine diphosphorylase                     | h[c] + utp[c] + gam1p[c] => ppi[c] + ugam[c]      | 0   |                                            | 0     | 1000 | 2  | Aminosugar Metabolism           | PMID:18931137, PMID:19460428, PMID:20974832 | Based on H. pylori LPS biosynthesis (BIGG database), as in the P. gingivalis reconstruction (PMID:18931137). P. gingivalis LPS is similar in structure to the Bacteroides LPS. Based on structural information taken from (PMID:19460428, PMID:20974832). | 2.7.7.23  |

| SEED Rxn ID | BIGG Rxn ID | Function                                                                                                          | Formula                                                          | Rev | GA                                         | LB    | UB   | CS | Subsystem                                  | Reference | Notes                             | EC Number |
|-------------|-------------|-------------------------------------------------------------------------------------------------------------------|------------------------------------------------------------------|-----|--------------------------------------------|-------|------|----|--------------------------------------------|-----------|-----------------------------------|-----------|
| rxn03933    | UAGPT2      | UDP-N-acetylglucosamine-N-acetylmuramyl-(pentapeptide)pyrophosphoryl-undecaprenol N-acetylglucosamine transferase | uacgam[c] + uaGgl[a][c] => h[c] + udp[c] + uaaGgl[a][c]          | 0   | BT_3448                                    | 0     | 1000 | 2  | Cell Envelope Biosynthesis                 |           | Reversible reaction in Model SEED | 2.4.1.227 |
| rxn03408    | UAGPT3      | UDP-N-acetylglucosamine-N-acetylmuramyl-(pentapeptide)pyrophosphoryl-undecaprenol N-acetylglucosamine transferase | uacgam[c] + uaagmda[c] => h[c] + udp[c] + uaagmda[c]             | 0   | BT_3448                                    | 0     | 1000 | 2  | Cell Envelope Biosynthesis                 |           |                                   | 2.4.1.227 |
| rxn02008    | UAMAGS      | UDP-N-acetylmuramoyl-L-alanyl-D-glutamate synthetase                                                              | atp[c] + glu-D[c] + uama[c] => h[c] + pi[c] + adp[c] + uamag[c]  | 0   | BT_3450                                    | 0     | 1000 | 2  | Cell Envelope Biosynthesis                 |           |                                   | 6.3.2.9   |
| rxn02286    | UAMAS       | UDP-N-acetylmuramoyl-L-alanine synthetase                                                                         | ala-L[c] + atp[c] + uamr[c] => h[c] + pi[c] + adp[c] + uama[c]   | 0   | BT_3447                                    | 0     | 1000 | 2  | Cell Envelope Biosynthesis                 |           |                                   | 6.3.2.8   |
| rxn02285    | UAPGR       | UDP-N-acetylenolpyruvoylglucosamine reductase                                                                     | h[c] + nadph[c] + uaceg[c] => nadp[c] + uamr[c]                  | 0   | BT_1368                                    | 0     | 1000 | 2  | Cell Envelope Biosynthesis                 |           |                                   | 1.1.1.158 |
| rxn03901    | UDCPDP      | undecaprenyl-diphosphatase                                                                                        | h2o[c] + udcmdp[c] => h[c] + pi[c] + udcpp[c]                    | 0   | BT_3212                                    | 0     | 1000 | 2  | Cell Envelope Biosynthesis                 |           |                                   | 3.6.1.27  |
| rxn04308    | UDCPDPS     | Undecaprenyl diphosphate synthase                                                                                 | 8 ipdp[c] + frdp[c] => 8 ppi[c] + udcmdp[c]                      | 0   | BT_3726                                    | 0     | 1000 | 2  | Cofactor and Prosthetic Group Biosynthesis |           |                                   | 2.5.1.31  |
| rxn00214    | UDPG4E      | UDPglucose 4-epimerase                                                                                            | udpg[c] <=> udpgal[c]                                            | 1   | (BT_0623 or BT_2887)                       | -1000 | 1000 | 2  | Alternate Carbon Metabolism                |           |                                   | 5.1.3.2   |
| rxn00211    | UDPGDr      | UDPglucoseNAD+ oxidoreductase                                                                                     | h2o[c] + 2 nad[c] + udpg[c] <=> 3 h[c] + 2 nadh[c] + udpglcur[c] | 1   | (BT_0379 or BT_0599 or BT_0829 or BT_1341) | -1000 | 1000 | 2  | Pentose and Glucuronate Interconversions   |           |                                   | 1.1.1.22  |

| SEED Rxn ID | BIGG Rxn ID | Function                                                                                        | Formula                                                            | Rev | GA                              | LB    | UB   | CS | Subsystem                                | Reference                                   | Notes                                                                                                                                                                                                                                                     | EC Number |
|-------------|-------------|-------------------------------------------------------------------------------------------------|--------------------------------------------------------------------|-----|---------------------------------|-------|------|----|------------------------------------------|---------------------------------------------|-----------------------------------------------------------------------------------------------------------------------------------------------------------------------------------------------------------------------------------------------------------|-----------|
|             | UDPGLCURE   | UDP-glucuronate 5'-epimerase                                                                    | udpglcure[c] <=> udpidour[c]                                       | 1   | (BT_0600 or BT_1342 or BT_0380) | -1000 | 1000 | 2  | Pentose and Glucuronate Interconversions |                                             | Annotation taken from The SEED. This reaction is probably involved in chondroitin sulfate degradation, but the exact pathway is unknown.                                                                                                                  | 5.1.3.12  |
|             | UDPGLDC     | UDP-D-glucuronate decarboxylase                                                                 | h[c] + udpglcure[c] => co2[c] + udp[gluc]c[c]                      | 0   | BT_1059                         | 0     | 1000 | 2  | Capsular Polysaccharide Biosynthesis     | PMID:21804000                               | The product is likely a precursor for capsule polysaccharide biosynthesis, but the exact function is unknown.                                                                                                                                             | 4.1.1.35  |
|             | UGLT        | UDPglucose--hexose-1-phosphate uridylyltransferase                                              | gal1p[c] + udpglc[c] <=> gal1p[c] + udp[gluc]c[c]                  | 1   |                                 | -1000 | 1000 | 2  | Alternate Carbon Metabolism              | PMID:16887504                               | The reaction is needed for galactose utilization.                                                                                                                                                                                                         | 2.7.7.12  |
| rxn03164    | UGMDDS      | UDP-N-acetylmuramoyl-L-alanyl-D-glutamyl-meso-2,6-diaminopimeloyl-D-alanyl-D-alanine synthetase | atp[c] + alaala[c] + ugmdd[c] => h[c] + pi[c] + adp[c] + ugmdda[c] | 0   | (BT_3644 or BT_4101)            | 0     | 1000 | 2  | Cell Envelope Biosynthesis               |                                             |                                                                                                                                                                                                                                                           | 6.3.2.15  |
|             | UHGADA_HP   | UDP-3-O-acetylglucosamine deacetylase                                                           | h2o[c] + u3aga_HP[c] => ac[c] + u3hga_HP[c]                        | 0   |                                 | 0     | 1000 | 2  | Lipopolysaccharide Biosynthesis          | PMID:18931137, PMID:19460428, PMID:20974832 | Based on H. pylori LPS biosynthesis (BIGG database), as in the P. gingivalis reconstruction (PMID:18931137). P. gingivalis LPS is similar in structure to the Bacteroides LPS. Based on structural information taken from (PMID:19460428, PMID:20974832). |           |
| rxn00711    | UPPRT       | uracil phosphoribosyltransferase                                                                | prpp[c] + ura[c] => ump[c] + ppi[c]                                | 0   | BT_2791                         | 0     | 1000 | 2  | Nucleotide Salvage Pathway               |                                             |                                                                                                                                                                                                                                                           | 2.4.2.9   |
| rxn05197    | URAt2r      | uracil transport in via proton symport reversible                                               | h[e] + ura[e] <=> h[c] + ura[c]                                    | 1   | BT_0686                         | -1000 | 1000 | 2  | Transport, Extracellular                 |                                             |                                                                                                                                                                                                                                                           |           |

| SEED Rxn ID | BIGG Rxn ID | Function                                                       | Formula                                          | Rev | GA                   | LB    | UB   | CS | Subsystem                  | Reference    | Notes                                                                                                                                                                                              | EC Number |
|-------------|-------------|----------------------------------------------------------------|--------------------------------------------------|-----|----------------------|-------|------|----|----------------------------|--------------|----------------------------------------------------------------------------------------------------------------------------------------------------------------------------------------------------|-----------|
| rxn02085    | URCN        | urocanase                                                      | h2o[c] + urcan[c] => 4izp[c]                     | 0   | BT_2694              | 0     | 1000 | 2  | Histidine Metabolism       |              | Reversible reaction in Model SEED                                                                                                                                                                  | 4.2.1.49  |
| rxn05667    | UREAt       | Urea transport via facilitate diffusion                        | urea[e] <=> urea[c]                              | 1   |                      | -1000 | 1000 | 1  | Transport, Extracellular   |              |                                                                                                                                                                                                    |           |
| rxn03397    | URFGTT      | UDP-L-rhamnose:flavonol-3-O-D-glucoside L-rhamnosyltransferase | amet[c] + 2ombz[c] => h[c] + ahcys[c] + 2ommb[c] | 0   | (BT_0853 or BT_4216) | 0     | 1000 | 2  | Unassigned                 | PMID: 893348 | It is not clear whether only menaquinone or mq and ubiquinone are synthesized. PMID: 893348 states that only menaquinone is present, however ubiquinone-using enzymes are annotated in the genome. | 2.1.1.-   |
| rxn00119    | URIDK1      | uridylate kinase (UMP)                                         | atp[c] + ump[c] => adp[c] + udp[c]               | 0   | BT_2242              | 0     | 1000 | 2  | Nucleotide Salvage Pathway |              | Reversible reaction in Model SEED                                                                                                                                                                  | 2.7.4.-   |
| rxn01517    | URIDK2r     | uridylate kinase (dUMP)                                        | atp[c] + dump[c] <=> adp[c] + dudp[c]            | 1   | BT_2242              | -1000 | 1000 | 2  | Nucleotide Salvage Pathway |              |                                                                                                                                                                                                    | 2.7.4.-   |
| rxn00709    | URIK1       | uridine kinase (ATP:Uridine)                                   | atp[c] + uri[c] => h[c] + adp[c] + ump[c]        | 0   | (BT_0184 or BT_2527) | 0     | 1000 | 2  | Nucleotide Salvage Pathway |              | Reversible reaction in Model SEED                                                                                                                                                                  | 2.7.1.48  |
| rxn00713    | URIK2       | uridine kinase (GTP:Uridine)                                   | gtp[c] + uri[c] => h[c] + ump[c] + gdp[c]        | 0   | (BT_0184 or BT_2527) | 0     | 1000 | 2  | Nucleotide Salvage Pathway |              | Reversible reaction in Model SEED                                                                                                                                                                  | 2.7.1.48  |
| rxn00715    | URIK3       | uridine kinase (ITP:Uridine)                                   | uri[c] + itp[c] => h[c] + ump[c] + idp[c]        | 0   | (BT_0184 or BT_2527) | 0     | 1000 | 2  | Nucleotide Salvage Pathway |              | Reversible reaction in Model SEED                                                                                                                                                                  | 2.7.1.48  |
| rxn05199    | URIt2r      | uridine transport in via proton symport reversible             | h[e] + uri[e] <=> h[c] + uri[c]                  | 1   | BT_4330              | -1000 | 1000 | 2  | Transport, Extracellular   |              |                                                                                                                                                                                                    |           |

| SEED Rxn ID | BIGG Rxn ID | Function                         | Formula                                                                                                                  | Rev | GA      | LB | UB   | CS | Subsystem                                  | Reference                                                                                                                            | Notes                                                                                                                                                                                                                                                                                                                                                                                                                         | EC Number |
|-------------|-------------|----------------------------------|--------------------------------------------------------------------------------------------------------------------------|-----|---------|----|------|----|--------------------------------------------|--------------------------------------------------------------------------------------------------------------------------------------|-------------------------------------------------------------------------------------------------------------------------------------------------------------------------------------------------------------------------------------------------------------------------------------------------------------------------------------------------------------------------------------------------------------------------------|-----------|
|             | USHD_BT     | UDP-sugar hydrolase              | $\text{h2o[c]} + \text{u23ga\_bt[c]} \Rightarrow 2 \text{ h[c]} + \text{ump[c]} + \text{lipidX\_bt[c]}$                  | 0   | BT_3697 | 0  | 1000 | 4  | Lipopolysaccharide Biosynthesis            | PMID:18931137, PMID:19460428, PMID:20974832                                                                                          | Based on H. pylori LPS biosynthesis (BIGG database), as in the P. gingivalis reconstruction (PMID:18931137). P. gingivalis LPS is similar in structure to the Bacteroides LPS. Based on structural information taken from (PMID:19460428, PMID:20974832).                                                                                                                                                                     |           |
|             | VALO        | Valine oxidation by gut bacteria | $4 \text{ h2o[c]} + 5 \text{ val-L[c]} \Rightarrow \text{h[c]} + \text{co2[c]} + 5 \text{ nh4[c]} + 6 \text{ isobut[c]}$ | 0   |         | 0  | 1000 | 2  | Valine, Leucine, and Isoleucine Metabolism | PMID:3572204, PMID:16887608, Krieg, N. R. (2010). Bergey's manual of systematic bacteriology, 2nd ed., volume 4. New York, Springer. | Valine and leucine are oxidized by gut bacteria to BCFA (branched-chain fatty acids) with one less carbon atom (isobutyrate and isovalerate, respectively), CO2 and ammonia. This reaction formula is hypothetical, no information on exact pathway and involved enzymes is available. KEGG does not provide any pathway information either. Isobutyrate and isovalerate are known secretion products of B. thetaiotaomicron. |           |

| SEED Rxn ID | BIGG Rxn ID | Function                                         | Formula                                          | Rev | GA                                               | LB    | UB   | CS | Subsystem                                  | Reference      | Notes                                                                                                                                                                                                                     | EC Number |
|-------------|-------------|--------------------------------------------------|--------------------------------------------------|-----|--------------------------------------------------|-------|------|----|--------------------------------------------|----------------|---------------------------------------------------------------------------------------------------------------------------------------------------------------------------------------------------------------------------|-----------|
| rxn05669    | VALt2r      | L-valine reversible transport via proton symport | h[e] + val-L[e] <=> h[c] + val-L[c]              | 1   |                                                  | -1000 | 1000 | 2  | Transport, Extracellular                   | PMID:7462155   | B. thetaiotaomicron incorporates leucine, valine and isoleucine into its phospholipids, which suggests the presence of a transporter for these amino acids. However, it is not known which gene encodes this transporter. |           |
| rxn00903    | VALTA       | valine transaminase                              | akg[c] + val-L[c] <=> glu-L[c] + 3mob[c]         | 1   | BT_3892                                          | -1000 | 1000 | 2  | Valine, Leucine, and Isoleucine Metabolism |                |                                                                                                                                                                                                                           | 2.6.1.42  |
| rxn05202    | XANt2r      | xanthine transport in via proton symport         | h[e] + xan[e] <=> h[c] + xan[c]                  | 1   | BT_4473                                          | -1000 | 1000 | 2  | Transport, Extracellular                   |                |                                                                                                                                                                                                                           |           |
| rxn01544    | XPPT        | xanthine phosphoribosyltransferase               | prpp[c] + xan[c] => ppi[c] + xmp[c]              | 0   | (BT_0427 or BT_4386)                             | 0     | 1000 | 2  | Nucleotide Salvage Pathway                 |                |                                                                                                                                                                                                                           | 2.4.2.22  |
| rxn01545    | XTSNH       | Xanthosine hydrolase                             | h2o[c] + xtsn[c] => rib-D[c] + xan[c]            | 0   | BT_2808                                          | 0     | 1000 | 2  | Nucleotide Salvage Pathway                 |                | Reversible reaction in Model SEED                                                                                                                                                                                         | 3.2.2.8   |
| rxn01044    | XYLI1       | xylose isomerase                                 | xyl-D[c] <=> xylu-D[c]                           | 1   | BT_0793                                          | -1000 | 1000 | 3  | Alternate Carbon Metabolism                | PMID:16887504  | B. thetaiotaomicron can use D-xylose as carbon source.                                                                                                                                                                    | 5.3.1.5   |
| rxn00223    | XYLI2       | xylose isomerase                                 | glc-D[c] <=> fru[c]                              | 1   | BT_0793                                          | -1000 | 1000 | 3  | Alternate Carbon Metabolism                | PMID:16887504  | B. thetaiotaomicron can use D-xylose as carbon source.                                                                                                                                                                    | 5.3.1.5   |
| rxn01199    | XYLKr       | ATPD-xylose 5-phosphotransferase                 | atp[c] + xylu-D[c] <=> h[c] + adp[c] + xu5p-D[c] | 1   | (BT_0792 or BT_4423)                             | -1000 | 1000 | 2  | Pentose and Glucuronate Interconversions   |                |                                                                                                                                                                                                                           | 2.7.1.17  |
| rxn05671    | XYLt2       | D-xylose transport in via proton symport         | h[e] + xyl-D[e] => h[c] + xyl-D[c]               | 0   | BT_0794                                          | 0     | 1000 | 4  | Transport, Extracellular                   | PMID: 16887504 | B. thetaiotaomicron can use D-xylose as carbon source.                                                                                                                                                                    |           |
| rxn00776    | YUMPS       | yUMP synthetase                                  | r5p[c] + ura[c] <=> h2o[c] + psd5p[c]            | 1   | ((BT_3872 and BT_4501) or (BT_3213 and BT_4237)) | -1000 | 1000 | 2  | Purine and Pyrimidine Biosynthesis         |                |                                                                                                                                                                                                                           | 4.2.1.70  |
| rxn05315    | ZN2t4       | ZN2t4                                            | h[e] + zn2[c] + k[e] <=> h[c] + k[c] + zn2[e]    | 1   | BT_0499                                          | -1000 | 1000 | 2  | Transport, Extracellular                   |                |                                                                                                                                                                                                                           |           |

| SEED Rxn ID | BIGG Rxn ID | Function                      | Formula                                                                                                                                                                 | Rev | GA                                | LB | UB   | CS | Subsystem                | Reference | Notes | EC Number |
|-------------|-------------|-------------------------------|-------------------------------------------------------------------------------------------------------------------------------------------------------------------------|-----|-----------------------------------|----|------|----|--------------------------|-----------|-------|-----------|
| rxn05150    | ZNabc       | zinc transport via ABC system | $\text{h2o}[\text{c}] + \text{atp}[\text{c}] + \text{zn2}[\text{e}] \Rightarrow \text{h}[\text{c}] + \text{pi}[\text{c}] + \text{adp}[\text{c}] + \text{zn2}[\text{c}]$ | 0   | (BT_2206 and BT_3248 and BT_3249) | 0  | 1000 | 2  | Transport, Extracellular |           |       |           |

Table S10b: All metabolites included in iAH991.

| SEED Met ID | BIGG Met ID    | Name                                             | Formula       | Charge | KEGG ID |
|-------------|----------------|--------------------------------------------------|---------------|--------|---------|
| cpd00201    | 10fthf         | 10-Formyltetrahydrofolate                        | C20H21N7O7    | -2     | C00234  |
| cpd03524    | 10fthf5glu     | 10-formyltetrahydrofolate-[Glu](5)               | C40H45N11O19  | -6     |         |
| cpd11509    | 10m3hddcaACP   | 10-methyl-3-hydroxy-dodecanoyl-ACP               | C24H45N2O9PRS | -1     |         |
| cpd11559    | 10m3hundecACP  | 10-methyl-3-hydroxy-undecanoyl-ACP               | C23H43N2O9PRS | -1     |         |
| cpd11508    | 10m3oddcaACP   | 10-methyl-3-oxo-dodecanoyl-ACP                   | C24H43N2O9PRS | -1     |         |
| cpd11558    | 10m3oundecACP  | 10-methyl-3-oxo-undecanoyl-ACP                   | C23H41N2O9PRS | -1     |         |
| cpd11511    | 10mddcaACP     | 10-methyl-dodecanoyl-ACP                         | C24H45N2O8PRS | -1     |         |
| cpd11510    | 10mtddc2eACP   | 10-methyl-trans-dodec-2-enoyl-ACP                | C24H43N2O8PRS | -1     |         |
| cpd11560    | 10mtundec2eACP | 10-methyl-trans-undec-2-enoyl-ACP                | C23H41N2O8PRS | -1     |         |
| cpd11561    | 10mundecACP    | 10-methyl-undecanoyl-ACP                         | C23H43N2O8PRS | -1     |         |
| cpd11534    | 11m3hddcaACP   | 11-methyl-3-hydroxy-dodecanoyl-ACP               | C24H45N2O9PRS | -1     |         |
| cpd11533    | 11m3oddcaACP   | 11-methyl-3-oxo-dodecanoyl-ACP                   | C24H43N2O9PRS | -1     |         |
| cpd11536    | 11mddcaACP     | 11-methyl-dodecanoyl-ACP                         | C24H45N2O8PRS | -1     |         |
| cpd11535    | 11mtddc2eACP   | 11-methyl-trans-dodec-2-enoyl-ACP                | C24H43N2O8PRS | -1     |         |
|             | 12dgr160       | 1,2-Diacyl-sn-glycerol (dihexadecanoyl, n-C16:0) | C35H68O5      | 0      | C00641  |
|             | 12ethd         | 1,2-Ethanediol                                   | C2H6O2        | 0      | C01380  |
| cpd11513    | 12m3hmyrsACP   | 12-methyl-3-hydroxy-tetra-decanoyl-ACP           | C26H49N2O9PRS | -1     |         |
| cpd11563    | 12m3htridecACP | 12-methyl-3-hydroxy-tridecanoyl-ACP              | C25H47N2O9PRS | -1     |         |
| cpd11512    | 12m3omyrsACP   | 12-methyl-3-oxo-tetra-decanoyl-ACP               | C26H47N2O9PRS | -1     |         |
| cpd11562    | 12m3otridecACP | 12-methyl-3-oxo-tridecanoyl-ACP                  | C25H45N2O9PRS | -1     |         |
| cpd11515    | 12mmyrsACP     | 12-methyl-tetra-decanoyl-ACP                     | C26H49N2O8PRS | -1     |         |
| cpd11514    | 12mtmrs2eACP   | 12-methyl-trans-tetra-dec-2-enoyl-ACP            | C26H47N2O8PRS | -1     |         |

| SEED Met ID | BIGG Met ID      | Name                                                                                 | Formula       | Charge | KEGG ID |
|-------------|------------------|--------------------------------------------------------------------------------------|---------------|--------|---------|
| cpd11565    | 12mtridecACP     | 12-methyl-tridecanoyl-ACP                                                            | C25H47N2O8PRS | -1     |         |
| cpd11564    | 12mttritec2eACP  | 12-methyl-trans-tridec-2-enoyl-ACP                                                   | C25H45N2O8PRS | -1     |         |
|             | 12ppd-R          | (R)-Propane-1,2-diol                                                                 | C3H8O2        | 0      | C02912  |
| cpd00453    | 12ppd-S          | (S)-Propane-1,2-diol                                                                 | C3H8O2        | 0      | C02917  |
| cpd00203    | 13dpg            | 3-Phospho-D-glyceroyl phosphate                                                      | C3H4O10P2     | -4     | C00236  |
| cpd11538    | 13m3hmyrsACP     | 13-methyl-3-hydroxy-tetra-decanoyl-ACP                                               | C26H49N2O9PRS | -1     |         |
| cpd11537    | 13m3omyrsACP     | 13-methyl-3-oxo-tetra-decanoyl-ACP                                                   | C26H47N2O9PRS | -1     |         |
| cpd11540    | 13mmyrsACP       | 13-methyl-tetra-decanoyl-ACP                                                         | C26H49N2O8PRS | -1     |         |
| cpd11539    | 13mtmrs2eACP     | 13-methyl-trans-tetra-dec-2-enoyl-ACP                                                | C26H47N2O8PRS | -1     |         |
| cpd11517    | 14m3hpalmACP     | 14-methyl-3-hydroxy-hexa-decanoyl-ACP                                                | C28H53N2O9PRS | -1     |         |
| cpd11567    | 14m3hpentdecACP  | 14-methyl-3-hydroxy-pentadecanoyl-ACP                                                | C27H51N2O9PRS | -1     |         |
| cpd11516    | 14m3opalmACP     | 14-methyl-3-oxo-hexa-decanoyl-ACP                                                    | C28H51N2O9PRS | -1     |         |
| cpd11566    | 14m3opentdecACP  | 14-methyl-3-oxo-pentadecanoyl-ACP                                                    | C27H49N2O9PRS | -1     |         |
| cpd11519    | 14mpalmACP       | 14-methyl-hexa-decanoyl-ACP                                                          | C28H53N2O8PRS | -1     |         |
| cpd11569    | 14mpentdecACP    | 14-methyl-pentadecanoyl-ACP                                                          | C27H51N2O8PRS | -1     |         |
| cpd11518    | 14mtpalm2eACP    | 14-methyl-trans-hexa-dec-2-enoyl-ACP                                                 | C28H51N2O8PRS | -1     |         |
| cpd11568    | 14mtpentdec2eACP | 14-methyl-trans-pentadec-2-enoyl-ACP                                                 | C27H49N2O8PRS | -1     |         |
|             | 15dap            | 1,5-Diaminopentane                                                                   | C5H16N2       | 2      | C01672  |
| cpd11542    | 15m3hpalmACP     | 15-methyl-3-hydroxy-hexa-decanoyl-ACP                                                | C28H53N2O9PRS | -1     |         |
| cpd11541    | 15m3opalmACP     | 15-methyl-3-oxo-hexa-decanoyl-ACP                                                    | C28H51N2O9PRS | -1     |         |
| cpd11544    | 15mpalmACP       | 15-methyl-hexa-decanoyl-ACP                                                          | C28H53N2O8PRS | -1     |         |
| cpd11543    | 15mtpalm2eACP    | 15-methyl-trans-hexa-dec-2-enoyl-ACP                                                 | C28H51N2O8PRS | -1     |         |
| cpd15672    | 1aihpdceg3p      | 1-anteisoheptadecanoyl-sn-glycerol 3-phosphate (14-methyl-hexadecanoyl, anteiso-C17) | C20H39O7P     | -2     |         |

| SEED Met ID | BIGG Met ID | Name                                                                                  | Formula      | Charge | KEGG ID |
|-------------|-------------|---------------------------------------------------------------------------------------|--------------|--------|---------|
| cpd15675    | 1aipdecg3p  | 1-anteisopentadecanoyl-sn-glycerol 3-phosphate (12-methyl-tetradecanoyl, anteiso-C15) | C18H36O7P    | -1     |         |
| cpd15325    | 1ddecg3p    | 1-dodecanoyl-sn-glycerol 3-phosphate                                                  | C15H29O7P1   | -2     | C00681  |
| cpd15327    | 1hdecg3p    | 1-hexadecanoyl-sn-glycerol 3-phosphate                                                | C19H37O7P1   | -2     | C00681  |
| cpd15676    | 1ihdecg3p   | 1-isoheptadecanoyl-sn-glycerol 3-phosphate (14-methyl-pentadecanoyl, iso-C16)         | C19H38O7P    | -1     |         |
| cpd15671    | 1ihpdecg3p  | 1-isoheptadecanoyl-sn-glycerol 3-phosphate (15-methyl-hexadecanoyl, iso-C17)          | C20H39O7P    | -2     |         |
| cpd15674    | 1ipdecg3p   | 1-isopentadecanoyl-sn-glycerol 3-phosphate (13-methyl-tetradecanoyl, iso-C15)         | C18H36O7P    | -1     |         |
| cpd15673    | 1itdecg3p   | 1-isotetradecanoyl-sn-glycerol 3-phosphate (12-methyl-tridecanoyl, iso-C14)           | C17H34O7P    | -1     |         |
| cpd15328    | 1odec11eg3p | 1-octadec-11-enoyl-sn-glycerol 3-phosphate                                            | C21H39O7P1   | -2     |         |
| cpd15329    | 1odecg3p    | 1-octadecanoyl-sn-glycerol 3-phosphate                                                | C21H41O7P1   | -2     | C00681  |
| cpd02625    | 1p3h5c      | L-1-Pyrroline-3-hydroxy-5-carboxylate                                                 | C5H6NO3      | -1     | C04281  |
| cpd02431    | 1pyr5c      | 1-Pyrroline-5-carboxylate                                                             | C5H6NO2      | -1     | C03912  |
| cpd15331    | 1tdecg3p    | 1-tetradecanoyl-sn-glycerol 3-phosphate                                               | C17H33O7P1   | -2     | C00681  |
| cpd01570    | 23camp      | 2,3-Cyclic AMP                                                                        | C10H11N5O6P  | -1     | C02353  |
| cpd01571    | 23ccmp      | 2,3-Cyclic CMP                                                                        | C9H11N3O7P   | -1     | C02354  |
| cpd03702    | 23cgmp      | 2,3-Cyclic GMP                                                                        | C10H11N5O7P  | -1     | C06194  |
| cpd01572    | 23cump      | 2,3-Cyclic UMP                                                                        | C9H10N2O8P   | -1     | C02355  |
| cpd02120    | 23dhdp      | 2,3-Dihydrodipicolinate                                                               | C7H5NO4      | -2     | C03340  |
| cpd02498    | 23dhmb      | (R)-2,3-Dihydroxy-3-methylbutanoate                                                   | C5H9O4       | -1     | C04272  |
| cpd02535    | 23dhmp      | (R)-2,3-Dihydroxy-3-methylpentanoate                                                  | C6H11O4      | -1     | C06007  |
| cpd02921    | 25aics      | (S)-2-[5-Amino-1-(5-phospho-D-ribosyl)imidazole-4-carboxamido]succinate               | C13H15N4O12P | -4     | C04823  |
| cpd00957    | 25dhpp      | 2,5-Diamino-6-hydroxy-4-(5-phosphoribosylamino)-pyrimidine                            | C9H14N5O8P   | -2     | C01304  |
| cpd00504    | 26dap-LL    | LL-2,6-Diaminoheptanedioate                                                           | C7H14N2O4    | 0      | C00666  |
| cpd00516    | 26dap-M     | meso-2,6-Diaminoheptanedioate                                                         | C7H14N2O4    | 0      | C00680  |

| SEED Met ID | BIGG Met ID | Name                                                               | Formula    | Charge | KEGG ID |
|-------------|-------------|--------------------------------------------------------------------|------------|--------|---------|
| cpd00498    | 2ahbut      | (S)-2-Aceto-2-hydroxybutanoate                                     | C6H9O4     | -1     | C06006  |
| cpd02920    | 2ahhmd      | 2-Amino-4-hydroxy-6-hydroxymethyl-7,8-dihydropteridine diphosphate | C7H8N5O8P2 | -3     | C04807  |
| cpd00954    | 2ahhmp      | 2-Amino-4-hydroxy-6-hydroxymethyl-7,8-dihydropteridine             | C7H9N5O2   | 0      | C01300  |
| cpd02233    | 2ameph      | (2-Aminoethyl)phosphonate                                          | C2H7NO3P   | -1     | C03557  |
| cpd02211    | 2aobut      | L-2-Amino-3-oxobutanoate                                           | C4H7NO3    | 0      | C03508  |
| cpd00938    | 2c25dho     | 2-Carboxy-2,5-dihydro-5-oxofuran-2-acetate                         | C7H6O6     | 0      | C01278  |
| cpd00956    | 2cpr5p      | 1-(2-Carboxyphenylamino)-1-deoxy-D-ribose 5-phosphate              | C12H13NO9P | -3     | C01302  |
| cpd02857    | 2dda7p      | 2-Dehydro-3-deoxy-D-arabino-heptonate 7-phosphate                  | C7H10O10P  | -3     | C04691  |
| cpd02711    | 2ddg6p      | 2-Dehydro-3-deoxy-D-gluconate 6-phosphate                          | C6H8O9P    | -3     | C04442  |
| cpd00176    | 2ddglcn     | 2-Dehydro-3-deoxy-D-gluconate                                      | C6H9O6     | -1     | C00204  |
|             | 2dglcn      | 2-Deoxy-D-gluconate                                                | C6H11O6    | -1     | C02782  |
| cpd00712    | 2dhp        | 2-Dehydropantoate                                                  | C6H9O4     | -1     | C00966  |
|             | 2dmmq10     | 2-Demethylmenaquinone 10                                           | C60H86O2   | 0      | C05818  |
|             | 2dmmq11     | 2-Demethylmenaquinone 11                                           | C65H94O2   | 0      | C05818  |
|             | 2dmmq7      | 2-Demethylmenaquinone 7                                            | C45H62O2   | 0      | C05818  |
| cpd15352    | 2dmmq8      | 2-Demethylmenaquinone 8                                            | C50H70O2   | 0      | C05818  |
|             | 2dmmq9      | 2-Demethylmenaquinone 9                                            | C55H78O2   | 0      | C05818  |
| cpd15353    | 2dmmql8     | 2-Demethylmenaquinol 8                                             | C50H72O2   | 0      |         |
| cpd00509    | 2dr1p       | 2-Deoxy-D-ribose 1-phosphate                                       | C5H9O7P    | -2     | C00672  |
| cpd00510    | 2dr5p       | 2-Deoxy-D-ribose 5-phosphate                                       | C5H9O7P    | -2     | C00673  |
|             | 2fuclac     | 2-Fucosyllactose (HMO, PMID:11425797)                              | C18H32O15  | 0      | G00268  |
| cpd01710    | 2ippm       | 2-Isopropylmaleate                                                 | C7H8O4     | -2     | C02631  |
| cpd02894    | 2mahmp      | 2-Methyl-4-amino-5-hydroxymethylpyrimidine diphosphate             | C6H8N3O7P2 | -3     | C04752  |

| SEED Met ID | BIGG Met ID | Name                                                           | Formula        | Charge | KEGG ID |
|-------------|-------------|----------------------------------------------------------------|----------------|--------|---------|
| cpd00760    | 2mbcoa      | 2-Methylbutanoyl-CoA                                           | C26H40N7O17P3S | -4     | C01033  |
| cpd11495    | 2mbutACP    | 2-methylbutanoyl-ACP,2-methylbutyryl-ACP                       | C16H29N2O8PRS  | -1     |         |
| cpd08286    | 2me4p       | 2-C-methyl-D-erythritol 4-phosphate                            | C5H11O7P       | -2     | C11434  |
| cpd08301    | 2mecdp      | 2-C-methyl-D-erythritol 2,4-cyclodiphosphate                   | C5H10O9P2      | -2     | C11453  |
|             | 2mmal       | (R)-2-Methylmalate                                             | C5H6O5         | -2     |         |
|             | 2mmale      | 2-Methylmaleate                                                | C5H4O4         | -2     |         |
| cpd11545    | 2mpropACP   | 2-methylpropionyl-ACP,isobutyryl-ACP                           | C15H27N2O8PRS  | -1     |         |
| cpd00094    | 2obut       | 2-Oxobutanoate                                                 | C4H5O3         | -1     | C00109  |
| cpd03445    | 2ohph       | 2-Octaprenyl-6-hydroxyphenol                                   | C46H70O2       | 0      | C05811  |
| cpd03447    | 2ombz       | 2-Octaprenyl-6-methoxy-1,4-benzoquinone                        | C47H70O3       | 0      | C05813  |
|             | 2omfuc      | 2-o-methylfucose (rare sugar in rhamnogalacturonan II)         | C7H14O5        | 0      |         |
| cpd03449    | 2omhmb1     | 2-Octaprenyl-3-methyl-5-hydroxy-6-methoxy-1,4-benzoquinol      | C48H74O4       | 0      |         |
| cpd03448    | 2ommb       | 2-Octaprenyl-3-methyl-6-methoxy-1,4-benzoquinone               | C48H72O3       | 0      | C05814  |
| cpd03446    | 2omph       | 2-Octaprenyl-6-methoxyphenol                                   | C47H72O2       | 0      | C05812  |
|             | 2omxyl      | 2-O-methylxylose (rare sugar in rhamnogalacturonan II)         | C6H12O5        | 0      | 560157  |
| cpd08288    | 2p4c2me     | 2-phospho-4-(cytidine 5-diphospho)-2-C-methyl-D-erythritol     | C14H22N3O17P3  | -4     |         |
| cpd00482    | 2pg         | D-Glycerate 2-phosphate                                        | C3H4O7P        | -3     | C00631  |
| cpd00727    | 2pglyc      | 2-Phosphoglycolate                                             | C2H2O6P        | -3     | C00988  |
|             | 2s5epchc    | 2-Succinyl-5-enolpyruvyl-6-hydroxy-3-cyclohexene-1-carboxylate | C14H13O9       | -3     | C16519  |
| cpd03451    | 2shchc      | 2-Succinyl-6-hydroxy-2,4-cyclohexadiene-1-carboxylate          | C11H10O6       | -2     | C05817  |
| cpd00868    | 34hpp       | 3-(4-Hydroxyphenyl)pyruvate                                    | C9H7O4         | -1     | C01179  |
| cpd00840    | 36dahx      | (3S)-3,6-Diaminohexanoate                                      | C6H15N2O2      | 1      | C01142  |
| cpd00988    | 3amp        | 3-AMP                                                          | C10H12N5O7P    | -2     | C01367  |

| SEED Met ID | BIGG Met ID  | Name                                                                   | Formula        | Charge | KEGG ID |
|-------------|--------------|------------------------------------------------------------------------|----------------|--------|---------|
| cpd02693    | 3c2hmp       | 3-Carboxy-2-hydroxy-4-methylpentanoate                                 | C7H10O5        | -2     | C04411  |
| cpd01646    | 3c3hmp       | 3-Carboxy-3-hydroxy-4-methylpentanoate                                 | C7H10O5        | -2     | C02504  |
| cpd02605    | 3c4mop       | 3-Carboxy-4-methyl-2-oxopentanoate                                     | C7H8O5         | -2     | C04236  |
| cpd03454    | 3cmp         | 3-cmp                                                                  | C9H12N3O8P     | -2     | C05822  |
|             | 3ddgc        | 3-Dehydro-2-deoxy-D-gluconate                                          | C6H9O6         | -1     | C03926  |
|             | 3ddlhept     | 3-deoxy-d-lyxo-heptulosaric acid (rare sugar in rhamnogalacturonan II) | C7H9O8         | -1     |         |
| cpd00699    | 3dhq         | 3-Dehydroquinate                                                       | C7H9O6         | -1     | C00944  |
| cpd01716    | 3dhsk        | 3-Dehydroshikimate                                                     | C7H7O5         | -1     | C02637  |
|             | 3dsphgn      | (2S)-1-hydroxy-3-oxooctadecan-2-aminium                                | C18H38NO2      | 1      | C02934  |
|             | 3fuclac      | 3-Fucosyllactose (HMO, PMID:11425797)                                  | C18H32O15      | 0      | G00313  |
| cpd03701    | 3gmp         | 3-GMP                                                                  | C10H12N5O8P    | -2     | C06193  |
| cpd11478    | 3haACP       | (3R)-3-Hydroxyacyl-[acyl-carrier protein]                              | C15H27N2O9PRS  | -1     | C04618  |
|             | 3hcddec5eACP | (R)-3-hydroxy-cis-dodec-5-enoyl-[acyl-carrier protein]                 | C23H41N2O9PRS  | -1     |         |
|             | 3hemrs7eACP  | (R)-3-hydroxy-cis-myristol-7-eoyl-[acyl-carrier protein]               | C25H45N2O9PRS  | -1     |         |
|             | 3hcpalm9eACP | (R)-3-hydroxy-cis-palm-9-eoyl-[acyl-carrier protein]                   | C27H49N2O9PRS  | -1     |         |
|             | 3hcvac11eACP | (R)-3-hydroxy-cis-vacc-11-enoyl-[acyl-carrier protein]                 | C29H53N2O9PRS  | -1     |         |
| cpd11480    | 3hddecACP    | (R)-3-Hydroxydodecanoyl-[acyl-carrier protein]                         | C23H43N2O9PRS  | -1     | C05757  |
| cpd11482    | 3hdecACP     | (R)-3-Hydroxydecanoyl-[acyl-carrier protein]                           | C21H39N2O9PRS  | -1     | C04619  |
|             | 3hgACPm      | 3-hydroxyglutaryl-ACP methyl ester                                     | C17H29N2O11PRS | -1     |         |
| cpd11479    | 3hhexACP     | (R)-3-Hydroxyhexanoyl-[acyl-carrier protein]                           | C17H31N2O9PRS  | -1     | C05747  |
| cpd11484    | 3hmrsACP     | (R)-3-Hydroxytetradecanoyl-[acyl-carrier protein]                      | C25H47N2O9PRS  | -1     | C04688  |
| cpd11571    | 3hoctaACP    | (R)-3-Hydroxyoctadecanoyl-[acyl-carrier protein]                       | C29H55N2O9PRS  | -1     |         |
| cpd11483    | 3hoctACP     | (R)-3-Hydroxyoctanoyl-[acyl-carrier protein]                           | C19H35N2O9PRS  | -1     | C04620  |

| SEED Met ID | BIGG Met ID  | Name                                             | Formula        | Charge | KEGG ID |
|-------------|--------------|--------------------------------------------------|----------------|--------|---------|
|             | 3hpACPM      | 3-hydroxypimeloyl-ACP methyl ester               | C19H33N2O11PRS | -1     |         |
| cpd11481    | 3hpalmACP    | R-3-hydroxypalmitoyl-[acyl-carrier protein]      | C27H51N2O9PRS  | -1     | C04633  |
| cpd02210    | 3ig3p        | C-(3-Indolyl)-glycerol 3-phosphate               | C11H12NO6P     | -2     | C03506  |
| cpd11520    | 3mbutACP     | 3-methylbutanoyl-ACP,isovaleryl-ACP              | C16H29N2O8PRS  | -1     |         |
| cpd00123    | 3mob         | 3-Methyl-2-oxobutanoate                          | C5H7O3         | -1     | C00141  |
| cpd00508    | 3mop         | (S)-3-Methyl-2-oxopentanoate                     | C6H9O3         | -1     | C00671  |
|             | 3ocddc5eACP  | 3-oxo-cis-dodec-5-enoyl-[acyl-carrier protein]   | C23H39N2O9PRS  | -1     |         |
|             | 3ocmrs7eACP  | 3-oxo-cis-myristol-7-eoyl-[acyl-carrier protein] | C25H43N2O9PRS  | -1     |         |
|             | 3ocpalm9eACP | 3-oxo-cis-palm-9-eoyl-[acyl-carrier protein]     | C27H47N2O9PRS  | -1     |         |
|             | 3ocvac11eACP | 3-oxo-cis-vacc-11-enoyl-[acyl-carrier protein]   | C29H51N2O9PRS  | -1     |         |
| cpd11489    | 3oddecACP    | 3-Oxododecanoyl-[acyl-carrier protein]           | C23H41N2O9PRS  | -1     | C05756  |
| cpd11487    | 3odecACP     | 3-Oxodecanoyl-[acyl-carrier protein]             | C21H37N2O9PRS  | -1     | C05753  |
|             | 3ogACPM      | 3-ketoglutaryl-ACP methyl ester                  | C17H27N2O11PRS | -1     |         |
| cpd11486    | 3ohexACP     | 3-Oxohexanoyl-[acyl-carrier protein]             | C17H29N2O9PRS  | -1     | C05746  |
| cpd11491    | 3omrsACP     | 3-Oxotetradecanoyl-[acyl-carrier protein]        | C25H45N2O9PRS  | -1     | C05759  |
| cpd11490    | 3ooctACP     | 3-Oxoctanoyl-[acyl-carrier protein]              | C19H33N2O9PRS  | -1     | C05750  |
| cpd11570    | 3ooctdACP    | 3-Oxoctadecanoyl-[acyl-carrier protein]          | C29H53N2O9PRS  | -1     |         |
|             | 3opACPM      | 3-ketopimeloyl-ACP methyl ester                  | C19H31N2O11PRS | -1     |         |
| cpd11485    | 3opalmACP    | 3-Oxohexadecanoyl-[acyl-carrier protein]         | C27H49N2O9PRS  | -1     | C05762  |
| cpd00169    | 3pg          | 3-Phospho-D-glycerate                            | C3H4O7P        | -3     | C00197  |
| cpd02069    | 3php         | 3-Phosphohydroxypyruvate                         | C3H2O7P        | -3     | C03232  |
|             | 3pop         | 3-Phosphonopyruvate                              | C3H2O6P        | -3     | C02798  |
| cpd00932    | 3psme        | 5-O-(1-Carboxyvinyl)-3-phosphoshikimate          | C10H9O10P      | -4     | C01269  |

| SEED Met ID | BIGG Met ID  | Name                                             | Formula       | Charge | KEGG ID |
|-------------|--------------|--------------------------------------------------|---------------|--------|---------|
| cpd00989    | 3ump         | 3-UMP                                            | C9H11N2O9P    | -2     | C01368  |
| cpd00281    | 4abut        | 4-Aminobutanoate                                 | C4H9NO2       | 0      | C00334  |
| cpd00443    | 4abz         | 4-Aminobenzoate                                  | C7H6NO2       | -1     | C00568  |
| cpd08210    | 4adcho       | 4-amino-4-deoxychorismate                        | C10H10NO5     | -1     | C11355  |
| cpd00939    | 4ahmmp       | 4-Amino-5-hydroxymethyl-2-methylpyrimidine       | C6H9N3O       | 0      | C01279  |
| cpd02775    | 4ampm        | 4-Amino-2-methyl-5-phosphomethylpyrimidine       | C6H8N3O4P     | -2     | C04556  |
| cpd08287    | 4c2me        | 4-(cytidine 5-diphospho)-2-C-methyl-D-erythritol | C14H23N3O14P2 | -2     | C11435  |
| cpd00830    | 4h2oglt      | 4-Hydroxy-2-oxoglutarate                         | C5H4O6        | -2     | C01127  |
| cpd15378    | 4hba         | 4-Hydroxy-benzyl alcohol                         | C7H8O2        | 0      |         |
|             | 4hglusa      | L-4-hydroxyglutamic semialdehyde                 | C5H9NO4       | 0      | C05938  |
| cpd00851    | 4hpro-LT     | trans-4-Hydroxy-L-proline                        | C5H9NO3       | 0      | C01157  |
| cpd03608    | 4hthr        | 4-Hydroxy-L-threonine                            | C4H9NO4       | 0      | C06056  |
| cpd02311    | 4izp         | 4-Imidazolone-5-propanoate                       | C6H7N2O3      | -1     | C03680  |
| cpd11497    | 4m3hhexACP   | 4-methyl-3-hydroxy-hexanoyl-ACP                  | C18H33N2O9PRS | -1     |         |
| cpd11547    | 4m3hpentACP  | 4-methyl-3-hydroxy-pentanoyl-ACP                 | C17H31N2O9PRS | -1     |         |
| cpd11496    | 4m3ohexACP   | 4-methyl-3-oxo-hexanoyl-ACP                      | C18H31N2O9PRS | -1     |         |
| cpd11546    | 4m3opentACP  | 4-methyl-3-oxo-pentanoyl-ACP                     | C17H29N2O9PRS | -1     |         |
| cpd11499    | 4mhexACP     | 4-methyl-hexanoyl-ACP                            | C18H33N2O8PRS | -1     |         |
| cpd00200    | 4mop         | 4-Methyl-2-oxopentanoate                         | C6H9O3        | -1     | C00233  |
| cpd11549    | 4mpentACP    | 4-methyl-pentanoyl-ACP                           | C17H31N2O8PRS | -1     |         |
| cpd02654    | 4mpetz       | 4-Methyl-5-(2-phosphoethyl)-thiazole             | C6H8NO4PS     | -2     | C04327  |
| cpd11498    | 4mthex2eACP  | 4-methyl-trans-hex-2-enoyl-ACP                   | C18H31N2O8PRS | -1     |         |
| cpd11548    | 4mtpent2eACP | 4-methyl-trans-pent-2-enoyl-ACP                  | C17H29N2O8PRS | -1     |         |

| SEED Met ID | BIGG Met ID | Name                                                   | Formula       | Charge | KEGG ID |
|-------------|-------------|--------------------------------------------------------|---------------|--------|---------|
| cpd01977    | 4pasp       | 4-Phospho-L-aspartate                                  | C4H6NO7P      | -2     | C03082  |
| cpd02147    | 4per        | 4-Phospho-D-erythronate                                | C4H6O8P       | -3     | C03393  |
| cpd02201    | 4ppan       | D-4-Phosphopantothenate                                | C9H15NO8P     | -3     | C03492  |
| cpd02666    | 4ppcys      | N-((R)-4-Phosphopantothenoyl)-L-cysteine               | C12H20N2O9PS  | -3     | C04352  |
| cpd02882    | 4r5au       | 4-(1-D-Ribitylamino)-5-aminouracil                     | C9H16N4O6     | 0      | C04732  |
| cpd02893    | 5aizc       | 5-amino-1-(5-phospho-D-ribosyl)imidazole-4-carboxylate | C9H11N3O9P    | -3     | C04751  |
| cpd02720    | 5aprbu      | 5-Amino-6-(5-phosphoribitylamino)uracil                | C9H15N4O9P    | -2     | C04454  |
| cpd00931    | 5apru       | 5-Amino-6-(5-phosphoribosylamino)uracil                | C9H13N4O9P    | -2     | C01268  |
|             | 5caiz       | 5-phosphoribosyl-5-carboxyaminoimidazole               | C9H11N3O9P    | -3     |         |
|             | 5drib       | 5-deoxyribose                                          | C5H10O4       | 0      |         |
| cpd00502    | 5forthf     | 5-Formiminotetrahydrofolate                            | C20H22N8O6    | -2     | C00664  |
| cpd02197    | 5fthf       | 5-Formyltetrahydrofolate                               | C20H21N7O7    | -2     | C03479  |
| cpd11522    | 5m3hhexACP  | 5-methyl-3-hydroxy-hexanoyl-ACP                        | C18H33N2O9PRS | -1     |         |
| cpd11521    | 5m3ohexACP  | 5-methyl-3-oxo-hexanoyl-ACP                            | C18H31N2O9PRS | -1     |         |
| cpd11524    | 5mhexACP    | 5-methyl-hexanoyl-ACP                                  | C18H33N2O8PRS | -1     |         |
| cpd00147    | 5mta        | 5-Methylthioadenosine                                  | C11H15N5O3S   | 0      | C00170  |
| cpd11523    | 5mthex2eACP | 5-methyl-trans-hex-2-enoyl-ACP                         | C18H31N2O8PRS | -1     |         |
| cpd00345    | 5mthf       | 5-Methyltetrahydrofolate                               | C20H24N7O6    | -1     | C00440  |
| cpd01981    | 5mtr        | 5-Methylthio-D-ribose                                  | C6H12O4S      | 0      | C03089  |
| cpd02255    | 5odhf2a     | 5-Oxo-4,5-dihydrofuran-2-acetate                       | C6H5O4        | -1     | C03586  |
|             | 6hmhptpp    | 6-hydroxymethyl-dihydropterin pyrophosphate            | C7H8N5O8P2    | -3     |         |
| cpd11551    | 6m3hheptACP | 6-methyl-3-hydroxy-heptanoyl-ACP                       | C19H35N2O9PRS | -1     |         |
| cpd11501    | 6m3hocACP   | 6-methyl-3-hydroxy-octanoyl-ACP                        | C20H37N2O9PRS | -1     |         |

| SEED Met ID | BIGG Met ID  | Name                                           | Formula       | Charge | KEGG ID |
|-------------|--------------|------------------------------------------------|---------------|--------|---------|
| cpd11550    | 6m3oheptACP  | 6-methyl-3-oxo-heptanoyl-ACP                   | C19H33N2O9PRS | -1     |         |
| cpd11500    | 6m3oocACP    | 6-methyl-3-oxo-octanoyl-ACP                    | C20H35N2O9PRS | -1     |         |
| cpd11553    | 6mheptACP    | 6-methyl-heptanoyl-ACP                         | C19H35N2O8PRS | -1     |         |
| cpd11503    | 6mocACP      | 6-methyl-octanoyl-ACP                          | C20H37N2O8PRS | -1     |         |
| cpd11552    | 6mthept2eACP | 6-methyl-trans-hept-2-enoyl-ACP                | C19H33N2O8PRS | -1     |         |
| cpd11502    | 6mtoct2eACP  | 6-methyl-trans-oct-2-enoyl-ACP                 | C20H35N2O8PRS | -1     |         |
| cpd00284    | 6pgc         | 6-Phospho-D-gluconate                          | C6H10O10P     | -3     | C00345  |
| cpd00911    | 6pgl         | 6-phospho-D-glucono-1,5-lactone                | C6H9O9P       | -2     | C01236  |
| cpd11526    | 7m3hocACP    | 7-methyl-3-hydroxy-octanoyl-ACP                | C20H37N2O9PRS | -1     |         |
| cpd11525    | 7m3oocACP    | 7-methyl-3-oxo-octanoyl-ACP                    | C20H35N2O9PRS | -1     |         |
| cpd11528    | 7mocACP      | 7-methyl-octanoyl-ACP                          | C20H37N2O8PRS | -1     |         |
| cpd11527    | 7mtoct2eACP  | 7-methyl-trans-oct-2-enoyl-ACP                 | C20H35N2O8PRS | -1     |         |
|             | 7ocholate    | 3alpha,12alpha-Dihydroxy-7-oxo-5beta-cholanate | C24H37O5      | -1     | C04643  |
| cpd00800    | 8aonn        | 8-Amino-7-oxononanoate                         | C9H17NO3      | 0      | C01092  |
| cpd11505    | 8m3hdcaACP   | 8-methyl-3-hydroxy-decanoyl-ACP                | C22H41N2O9PRS | -1     |         |
| cpd11555    | 8m3hnonACP   | 8-methyl-3-hydroxy-nonanoyl-ACP                | C21H39N2O9PRS | -1     |         |
| cpd11504    | 8m3odcaACP   | 8-methyl-3-oxo-decanoyl-ACP                    | C22H39N2O9PRS | -1     |         |
| cpd11554    | 8m3ononACP   | 8-methyl-3-oxo-nonanoyl-ACP                    | C21H37N2O9PRS | -1     |         |
| cpd11507    | 8mdcaACP     | 8-methyl-decanoyl-ACP                          | C22H41N2O8PRS | -1     |         |
| cpd11557    | 8mnonACP     | 8-methyl-nonanoyl-ACP                          | C21H39N2O8PRS | -1     |         |
| cpd11506    | 8mtdec2eACP  | 8-methyl-trans-dec-2-enoyl-ACP                 | C22H39N2O8PRS | -1     |         |
| cpd11556    | 8mtnon2eACP  | 8-methyl-trans-non-2-enoyl-ACP                 | C21H37N2O8PRS | -1     |         |
| cpd11530    | 9m3hdcaACP   | 9-methyl-3-hydroxy-decanoyl-ACP                | C22H41N2O9PRS | -1     |         |

| SEED Met ID | BIGG Met ID  | Name                                                                             | Formula        | Charge | KEGG ID |
|-------------|--------------|----------------------------------------------------------------------------------|----------------|--------|---------|
| cpd11529    | 9m3odcaACP   | 9-methyl-3-oxo-decanoyl-ACP                                                      | C22H39N2O9PRS  | -1     |         |
| cpd11532    | 9mdcaACP     | 9-methyl-decanoyl-ACP                                                            | C22H41N2O8PRS  | -1     |         |
| cpd11531    | 9mtdec2eACP  | 9-methyl-trans-dec-2-enoyl-ACP                                                   | C22H39N2O8PRS  | -1     |         |
| cpd01298    | aact         | Aminoacetone                                                                     | C3H8NO         | 1      | C01888  |
| cpd00029    | ac           | Acetate                                                                          | C2H3O2         | -1     | C00033  |
| cpd11494    | acACP        | Acetyl-ACP                                                                       | C13H23N2O8PRS  | -1     |         |
| cpd00071    | acald        | Acetaldehyde                                                                     | C2H4O          | 0      | C00084  |
| cpd00022    | accoa        | Acetyl-CoA                                                                       | C23H34N7O17P3S | -4     | C00024  |
|             | acerA        | Aceric acid (3-C-carboxy-5-deoxy-1-xylose) (rare sugar in rhamnogalacturonan II) | C6H9O6         | -1     |         |
|             | acetol       | Acetol                                                                           | C3H6O2         | 0      | C05235  |
| cpd02552    | acg5p        | N-Acetyl-L-glutamyl 5-phosphate                                                  | C7H9NO8P       | -3     | C04133  |
| cpd00918    | acg5sa       | N-Acetyl-L-glutamate 5-semialdehyde                                              | C7H10NO4       | -1     | C01250  |
|             | acgal        | N-Acetyl-D-galactosamine                                                         | C8H15NO6       | 0      | C01132  |
|             | acgal6p      | N-Acetyl-D-galactosamine 6-phosphate                                             | C8H14NO9P      | -2     |         |
|             | acgalglcur   | Dimer GalNAc-GlcA                                                                | C14H22NO12     | -1     |         |
|             | acgalidour   | Dimer GalNAc-IdoA                                                                | C14H22NO12     | -1     |         |
|             | acgalidour2s | Dimer GalNAc-IdoA2S                                                              | C14H21NO15S    | -2     |         |
| cpd00122    | acgam        | N-Acetyl-D-glucosamine                                                           | C8H15NO6       | 0      | C00140  |
|             | acgam1p      | N-Acetyl-D-glucosamine 1-phosphate                                               | C8H14NO9P      | -2     | C04256  |
| cpd00293    | acgam6p      | N-Acetyl-D-glucosamine 6-phosphate                                               | C8H14NO9P      | -2     | C00357  |
| cpd00477    | acglu        | N-Acetyl-L-glutamate                                                             | C7H9NO5        | -2     | C00624  |
| cpd00790    | achms        | O-Acetyl-L-homoserine                                                            | C6H11NO4       | 0      | C01077  |
|             | acmam        | N-Acetyl-D-muramoate                                                             | C11H18NO8      | -1     | C05887  |

| SEED Met ID | BIGG Met ID | Name                                                                              | Formula          | Charge | KEGG ID |
|-------------|-------------|-----------------------------------------------------------------------------------|------------------|--------|---------|
| cpd01923    | acmama      | N-Acetyl-D-muramoyl-L-alanine                                                     | C14H23N2O9       | -1     | C02999  |
| cpd00492    | acmana      | N-Acetyl-D-mannosamine                                                            | C8H15NO6         | 0      | C00645  |
| cpd00232    | acnam       | N-Acetylneuraminate                                                               | C11H18NO9        | -1     | C00270  |
| cpd00331    | acon-C      | cis-Aconitate                                                                     | C6H3O6           | -3     | C00417  |
| cpd00342    | acorn       | N2-Acetyl-L-ornithine                                                             | C7H14N2O3        | 0      | C00437  |
| cpd11493    | ACP         | acyl carrier protein                                                              | C11H21N2O7PRS    | -1     | C00229  |
| cpd00722    | acser       | O-Acetyl-L-serine                                                                 | C5H9NO4          | 0      | C00979  |
| cpd11488    | actACP      | Acetoacetyl-ACP                                                                   | C15H25N2O9PRS    | -1     | C05744  |
| cpd00361    | actn-R      | (R)-Acetoin                                                                       | C4H8O2           | 0      | C00810  |
| cpd00196    | actp        | Acetyl phosphate                                                                  | C2H3O5P          | -2     | C00227  |
| cpd00128    | ade         | Adenine                                                                           | C5H5N5           | 0      | C00147  |
| cpd00836    | adh1am      | S-Acetyldihydrolipoamide                                                          | C10H19NO2S2      | 0      | C01136  |
| cpd00182    | adn         | Adenosine                                                                         | C10H13N5O4       | 0      | C00212  |
| cpd00166    | adocbl      | Adenosylcobalamin                                                                 | C72H100CoN18O17P | 0      | C00194  |
| cpd00008    | adp         | ADP                                                                               | C10H12N5O10P2    | -3     | C00008  |
|             | adphep7p-LD | ADP-L-glycero-D-manno-heptose-7-phosphate                                         | C17H24N5O19P3    | -4     |         |
|             | adphep-DD   | ADP-D-glycero-D-manno-heptose                                                     | C17H25N5O16P2    | -2     | C06397  |
|             | adphep-LD   | ADP-L-glycero-D-manno-heptose                                                     | C17H25N5O16P2    | -2     | C06398  |
| cpd00152    | agm         | Agmatine                                                                          | C5H16N4          | 2      | C00179  |
| cpd00019    | ahcys       | S-Adenosyl-L-homocysteine                                                         | C14H20N6O5S      | 0      | C00021  |
| cpd02978    | ahdt        | 2-Amino-4-hydroxy-6-(erythro-1,2,3-trihydroxypropyl)dihydropteridine triphosphate | C9H12N5O13P3     | -4     | C04895  |
| cpd02851    | aicar       | 5-Amino-1-(5-Phospho-D-ribosyl)imidazole-4-carboxamide                            | C9H13N4O8P       | -2     | C04677  |
| cpd11434    | aihpcoa     | fa12coa,Anteiso-C17:0 CoA Anteisoheptadecanoyl-CoA                                | C38H64N7O17P3S   | -4     |         |

| SEED Met ID | BIGG Met ID | Name                                                                                      | Formula         | Charge | KEGG ID |
|-------------|-------------|-------------------------------------------------------------------------------------------|-----------------|--------|---------|
| cpd11439    | aipdcoa     | fa4coa,Anteiso-C15:0 CoA Anteisopentadecanoyl-CoA                                         | C36H60N7O17P3S  | -4     |         |
| cpd02140    | air         | 5-amino-1-(5-phospho-D-ribose)imidazole                                                   | C8H12N3O7P      | -2     | C03373  |
| cpd00024    | akg         | 2-Oxoglutarate                                                                            | C5H4O5          | -2     | C00026  |
| cpd00731    | alaala      | D-Alanyl-D-alanine                                                                        | C6H12N2O3       | 0      | C00993  |
|             | alaasp      | L-alanyl-L-aspartate                                                                      | C7H11N2O5       | -1     |         |
| cpd00085    | ala-B       | beta-Alanine                                                                              | C3H7NO2         | 0      | C00099  |
| cpd00668    | alac-S      | (S)-2-Acetolactate                                                                        | C5H7O4          | -1     | C06010  |
| cpd00117    | ala-D       | D-Alanine                                                                                 | C3H7NO2         | 0      | C00133  |
|             | alagln      | L-alanyl-L-glutamine                                                                      | C8H15N3O4       | 0      |         |
|             | alaglu      | L-alanyl-L-glutamate                                                                      | C8H13N2O5       | -1     |         |
|             | alagly      | L-alanylglycine                                                                           | C5H10N2O3       | 0      |         |
|             | alahis      | L-alanyl-L-histidine                                                                      | C9H14N4O3       | 1      |         |
| cpd00035    | ala-L       | L-Alanine                                                                                 | C3H7NO2         | 0      | C00041  |
|             | alaleu      | L-alanyl-L-leucine                                                                        | C9H18N2O3       | 0      |         |
|             | alathr      | L-alanyl-L-threonine                                                                      | C7H14N2O4       | 0      |         |
| cpd11830    | alpro       | S-Aminomethyldihydrolipoylprotein                                                         | CH6NS2X         | 1      | C01242  |
| cpd00608    | altrn       | D-Altronate                                                                               | C6H11O7         | -1     | C00817  |
|             | amannan140  | Alpha-mannan, yeast, has a MW of about 25000 (PMID: 5461381), equals ~ 140 mannose units. | C840H1402O701   | 0      |         |
| cpd00017    | amet        | S-Adenosyl-L-methionine                                                                   | C15H23N6O5S     | 1      | C00019  |
| cpd02701    | amob        | S-Adenosyl-4-methylthio-2-oxobutanoate                                                    | C15H19N5O6S     | 0      | C04425  |
| cpd00018    | amp         | AMP                                                                                       | C10H12N5O7P     | -2     | C00020  |
|             | amylose300  | amylose (n=300 repeat units, alpha-1,4-glc)                                               | C1800H3002O1501 | 0      | C00718  |
| cpd00093    | anth        | Anthranilate                                                                              | C7H6NO2         | -1     | C00108  |

| SEED Met ID | BIGG Met ID  | Name                                                                                                                                                                                                                                                            | Formula         | Charge | KEGG ID |
|-------------|--------------|-----------------------------------------------------------------------------------------------------------------------------------------------------------------------------------------------------------------------------------------------------------------|-----------------|--------|---------|
|             | apio-D       | D-Apiose (rare sugar in rhamnogalacturonan II)                                                                                                                                                                                                                  | C5H10O5         | 0      | C01488  |
| cpd12370    | apoACP       | apoprotein [acyl carrier protein]                                                                                                                                                                                                                               | RHO             | 0      |         |
| cpd12543    | apoC_Lys     | Apocarboxylase (Lys residue)                                                                                                                                                                                                                                    | C6H13N2OX       | 0      | C04419  |
| cpd12848    | apoC_Lys_btn | Holocarboxylase (biotin covalent bound to Lys residue of apoC)                                                                                                                                                                                                  | C16H27N4O3SX    | 0      | C06250  |
| cpd00193    | aps          | Adenosine 5-phosphosulfate                                                                                                                                                                                                                                      | C10H12N5O10PS   | -2     | C00224  |
| cpd00817    | ara5p        | D-Arabinose 5-phosphate                                                                                                                                                                                                                                         | C5H9O8P         | -2     | C01112  |
|             | arabinan101  | Arabinan, polymer of 1,5-a-L-linked arabinofuranose units substituted by 1,3 or 1,2 linked branches, MW ~ 15000 Da (REF: www.megazyme.com). Contains Arabinose: Galactose: Rhamnose: Galacturonic acid = 97: 0.4: 0.1: 2.1. -> 97 arab-L, 1 gal, 1 rmn, 2 galur | C509H812O410    | -2     | C02474  |
|             | arabinogal   | Larch arabinogalactan, gal/ara 6:1, small amount of glcur, MW ~ 116000                                                                                                                                                                                          | C3862H6376O3218 | 0      | C00569  |
| cpd00224    | arab-L       | L-Arabinose                                                                                                                                                                                                                                                     | C5H10O5         | 0      | C00259  |
| cpd12115    | arabtr       | Arabinotriose                                                                                                                                                                                                                                                   | C15H26O13       | 0      | C02474  |
|             | argarg       | L-argininyl-L-arginine                                                                                                                                                                                                                                          | C12H28N8O3      | 2      |         |
| cpd00051    | arg-L        | L-Arginine                                                                                                                                                                                                                                                      | C6H15N4O2       | 1      | C00062  |
| cpd02152    | argsuc       | N(omega)-(L-Arginino)succinate                                                                                                                                                                                                                                  | C10H17N4O6      | -1     | C03406  |
| cpd00132    | asn-L        | L-Asparagine                                                                                                                                                                                                                                                    | C4H8N2O3        | 0      | C00152  |
| cpd00041    | asp-L        | L-Aspartate                                                                                                                                                                                                                                                     | C4H6NO4         | -1     | C00049  |
| cpd00346    | aspsa        | L-Aspartate 4-semialdehyde                                                                                                                                                                                                                                      | C4H7NO3         | 0      | C00441  |
| cpd00002    | atp          | ATP(4-)                                                                                                                                                                                                                                                         | C10H12N5O13P3   | -4     | C00002  |
|             | Brfap        | 4-(B-D-ribofuranosyl)aminobenzene 5-phosphate                                                                                                                                                                                                                   | C11H14NO7P      | -2     |         |
| cpd03517    | btamp        | Biotinyl-5-AMP                                                                                                                                                                                                                                                  | C20H27N7O9PS    | -1     | C05921  |
| cpd00120    | btcoa        | Butanoyl-CoA                                                                                                                                                                                                                                                    | C25H38N7O17P3S  | -4     | C00136  |
| cpd00104    | btn          | Biotin                                                                                                                                                                                                                                                          | C10H15N2O3S     | -1     | C00120  |
| cpd00211    | but          | Butyrate (n-C4:0)                                                                                                                                                                                                                                               | C4H7O2          | -1     | C00246  |

| SEED Met ID | BIGG Met ID  | Name                                                                          | Formula         | Charge | KEGG ID |
|-------------|--------------|-------------------------------------------------------------------------------|-----------------|--------|---------|
| cpd11465    | but2eACP     | But-2-enoyl-[acyl-carrier protein]                                            | C15H25N2O8PRS   | -1     | C04246  |
| cpd11464    | butACP       | Butyryl-ACP (n-C4:0ACP)                                                       | C15H27N2O8PRS   | -1     | C05745  |
| cpd01662    | butpi        | Butanoyl phosphate                                                            | C4H7O5P         | -2     | C02527  |
| cpd00063    | ca2          | Calcium                                                                       | Ca              | 2      | C00076  |
|             | carn         | carnosine                                                                     | C9H14N4O3       | 0      | C00386  |
| cpd00343    | cbasp        | N-Carbamoyl-L-aspartate                                                       | C5H6N2O5        | -2     | C00438  |
| cpd00635    | cb1l         | Cob(I)alamin                                                                  | C62H88CoN13O14P | -1     | C00853  |
| cpd00146    | cbp          | Carbamoyl phosphate                                                           | CH2NO5P         | -2     | C00169  |
| cpd01012    | cd2          | Cadmium                                                                       | Cd              | 2      | C01413  |
|             | cddec5eACP   | cis-dodec-5-enoyl-[acyl-carrier protein] (n-C12:1)                            | C23H41N2O8PRS   | -1     |         |
|             | cdec3eACP    | cis-dec-3-enoyl-[acyl-carrier protein] (n-C10:1)                              | C21H37N2O8PRS   | -1     |         |
| cpd00096    | cdp          | CDP                                                                           | C9H12N3O11P2    | -3     | C00112  |
|             | cdpchol      | CDPcholine                                                                    | C14H25N4O11P2   | -1     | C00307  |
| cpd15684    | cdpdaihpcdeg | CDP-1,2-dianteisoheptadecanoylglycerol (14-methyl-hexadecanoyl, anteiso-C17)  | C46H83N3O15P2   | -2     |         |
| cpd15687    | cdpdaipdeg   | CDP-1,2-dianteisopentadecanoylglycerol (12-methyl-tetradecanoyl, anteiso-C15) | C42H75N3O15P2   | -2     |         |
| cpd15417    | cdpdddeg     | CDP-1,2-didodecanoylglycerol                                                  | C36H63N3O15P2   | -2     | C00269  |
|             | cdpddg       | CDP-4-dehydro-6-deoxy-D-glucose                                               | C15H21N3O15P2   | -2     | C01219  |
| cpd15419    | cdpdhdeg     | CDP-1,2-dihexadecanoylglycerol                                                | C44H79N3O15P2   | -2     | C00269  |
| cpd15688    | cdpdihdeg    | CDP-1,2-diisohexadecanoylglycerol (14-methyl-pentadecanoyl, iso-C16)          | C44H79N3O15P2   | -2     |         |
| cpd15683    | cdpdihpdeg   | CDP-1,2-diisoheptadecanoylglycerol (15-methyl-hexadecanoyl, iso-C17)          | C46H83N3O15P2   | -2     |         |
| cpd15686    | cdpdipdeg    | CDP-1,2-diisopentadecanoylglycerol (13-methyl-tetradecanoyl, iso-C15)         | C42H75N3O15P2   | -2     |         |
| cpd15685    | cdpditdeg    | CDP-1,2-diisotetradecanoylglycerol (12-methyl-tridecanoyl, iso-C14)           | C40H71N3O15P2   | -2     |         |
| cpd15420    | cdpdodec11eg | CDP-1,2-dioctadec-11-enoylglycerol                                            | C48H83N3O15P2   | -2     | C00269  |

| SEED Met ID | BIGG Met ID | Name                                                                 | Formula       | Charge | KEGG ID |
|-------------|-------------|----------------------------------------------------------------------|---------------|--------|---------|
| cpd15421    | cdpdodecg   | CDP-1,2-dioctadecanoylglycerol                                       | C48H87N3O15P2 | -2     | C00269  |
| cpd15423    | cdpdtdecg   | CDP-1,2-ditetradecanoylglycerol                                      | C40H71N3O15P2 | -2     | C00269  |
|             | cdpea       | CDP-ethanolamine(1-)                                                 | C11H19N4O11P2 | -1     | C00570  |
| cpd00390    | cdpglc      | CDPglucose                                                           | C15H23N3O16P2 | -2     | C00501  |
| cpd00158    | cellb       | cellobiose                                                           | C12H22O11     | 0      | C00185  |
|             | cer1_bt     | Ceramide-1 (Sphinganine:C15:0 anteiso)(B. thetaiotaomicron specific) | C35H71NO3     | 0      |         |
| cpd01017    | cgly        | Cys-Gly                                                              | C5H10N2O3S    | 0      | C01419  |
| cpd00098    | chol        | Choline                                                              | C5H14NO       | 1      | C00114  |
|             | cholate     | Cholate                                                              | C24H39O5      | -1     | C00695  |
|             | cholp       | choline phosphate(1-)                                                | C5H13NO4P     | -1     | C00588  |
| cpd00681    | chols       | Choline sulfate                                                      | C5H13NO4S     | 0      | C00919  |
| cpd00216    | chor        | chorismate                                                           | C10H8O6       | -2     | C00251  |
| cpd01157    | chtbs       | N,N-diacetylchitobiose                                               | C16H28N2O11   | 0      | C01674  |
| cpd00137    | cit         | Citrate                                                              | C6H5O7        | -3     | C00158  |
| cpd00274    | citr-L      | L-Citrulline                                                         | C6H13N3O3     | 0      | C00327  |
|             | ckdn        | CMP-3-deoxy-D-glycero-D-galacto-nonulosonic acid                     | C18H26N3O16P  | -2     |         |
| cpd02546    | ckdo        | CMP-3-deoxy-D-manno-octulosonate                                     | C17H24N3O15P  | -2     |         |
| cpd00099    | cl          | Chloride                                                             | Cl            | -1     | C00115  |
| cpd15792    | clpn140     | cardiolipin (tetradecanoyl, n-C14:0)                                 | C65H124O17P2  | -2     | C05980  |
| cpd15791    | clpn160     | cardiolipin (tetrahexadecanoyl, n-C16:0)                             | C73H140O17P2  | -2     | C05980  |
| cpd15793    | clpn180     | cardiolipin (tetraoctadecanoyl, n-C18:0)                             | C81H156O17P2  | -2     | C05980  |
| cpd15798    | clpnai15    | cardiolipin (12-methyl-tetradecanoyl, anteiso-C15)                   | C69H132O17P2  | -2     |         |
| cpd15795    | clpnai17    | cardiolipin (14-methyl-hexadecanoyl, anteiso-C17)                    | C77H148O17P2  | -2     |         |

| SEED Met ID | BIGG Met ID  | Name                                                                    | Formula         | Charge | KEGG ID |
|-------------|--------------|-------------------------------------------------------------------------|-----------------|--------|---------|
| cpd15796    | clpni14      | cardiolipin (12-methyl-tridecanoyl, iso-C14)                            | C65H124O17P2    | -2     |         |
| cpd15797    | clpni15      | cardiolipin (13-methyl-tetradecanoyl, iso-C15)                          | C69H132O17P2    | -2     |         |
| cpd15799    | clpni16      | cardiolipin (14-methyl-pentadecanoyl, iso-C16)                          | C73H140O17P2    | -2     |         |
| cpd15794    | clpni17      | cardiolipin (15-methyl-hexadecanoyl, iso-C17)                           | C77H148O17P2    | -2     |         |
| cpd00046    | cmp          | CMP                                                                     | C9H12N3O8P      | -2     | C00055  |
| cpd00011    | co2          | CO2                                                                     | CO2             | 0      | C00011  |
| cpd00010    | coa          | Coenzyme A                                                              | C21H32N7O16P3S  | -4     | C00010  |
| cpd00149    | cobalt2      | Co2+                                                                    | Co              | 2      | C00175  |
|             | core_lps_bt  | core_lps_bt                                                             | C139H253N2O66P3 | -1     |         |
|             | core2        | Core 2                                                                  | C22H37N2O15X    | 0      |         |
|             | core3        | Core 3                                                                  | C16H27N2O10X    | 0      |         |
|             | core4        | Core 4                                                                  | C24H40N3O15X    | 0      |         |
|             | core5        | Core 5                                                                  | C16H27N2O10X    | 0      |         |
|             | core6        | Core 6                                                                  | C16H27N2O10X    | 0      |         |
|             | core7        | Core 7                                                                  | C16H27N2O10X    | 0      |         |
|             | core8        | Core 8                                                                  | C14H24NO10X     | 0      |         |
|             | cps_bt       | Capsule polysaccharide (B.thetaiotaomicron specific)                    | C69H102O67P8N14 | -10    |         |
|             | cspg_a       | chondroitin sulfate A (GalNAc4S-GlcA) proteoglycan                      | C45H66N2O45S3X  | -5     |         |
|             | cspg_a_degr  | Dimer GalNAc4S-GlcA                                                     | C14H21NO15S     | -2     |         |
|             | cspg_ab_rest | Not degradable product CSABCPASE_A/B, Gal4S-Gal-Xyl-L-Ser-protein       | C17H28O17SX     | -1     |         |
|             | cspg_b       | chondroitin sulfate B / dermatan sulfate (IdoA2S-GalNAc4S) proteoglycan | C45H65N2O48S4X  | -6     |         |
|             | cspg_b_degr  | Dimer GalNAc4S-IdoA2S                                                   | C14H20NO18S2    | -3     |         |
|             | cspg_c       | chondroitin sulfate C (GalNAc6S-GlcA) proteoglycan                      | C45H66N2O45S3X  | -5     |         |

| SEED Met ID | BIGG Met ID | Name                                                            | Formula       | Charge | KEGG ID |
|-------------|-------------|-----------------------------------------------------------------|---------------|--------|---------|
|             | cspg_c_degr | Dimer GalNAc6S-GlcA                                             | C14H21NO15S   | -2     |         |
|             | cspg_c_rest | Not degradable product CSABCPASE_C, Gal6S-Gal-Xyl-L-Ser-protein | C17H28O17SX   | -1     |         |
|             | cspmd       | Carboxyspermidine                                               | C8H20N3O2     | 1      | C18172  |
| cpd08305    | ctbt        | crotonobetaine                                                  | C7H13NO2      | 0      | C04114  |
| cpd00052    | ctp         | CTP                                                             | C9H12N3O14P3  | -4     | C00063  |
| cpd00058    | cu2         | Cu2+                                                            | Cu            | 2      | C00070  |
| cpd00084    | cys-L       | L-Cysteine                                                      | C3H7NO2S      | 0      | C00097  |
| cpd00367    | cytd        | Cytidine                                                        | C9H13N3O5     | 0      | C00475  |
| cpd00438    | dad-2       | Deoxyadenosine                                                  | C10H13N5O3    | 0      | C00559  |
| cpd03091    | dad-5       | 5-Deoxyadenosine                                                | C10H13N5O3    | 0      | C05198  |
| cpd00177    | dadp        | dADP                                                            | C10H12N5O9P2  | -3     | C00206  |
| cpd00294    | damp        | dAMP                                                            | C10H12N5O6P   | -2     | C00360  |
| cpd00764    | dann        | 7,8-Diaminononanoate                                            | C9H21N2O2     | 1      | C01037  |
| cpd00115    | datp        | dATP                                                            | C10H12N5O12P3 | -4     | C00131  |
| cpd11225    | db4p        | 3,4-dihydroxy-2-butanone 4-phosphate                            | C4H7O6P       | -2     | C15556  |
| cpd11474    | dcaACP      | Decanoyl-ACP (n-C10:0ACP)                                       | C21H39N2O8PRS | -1     | C05755  |
| cpd02375    | dcamp       | N6-(1,2-Dicarboxyethyl)-AMP                                     | C14H14N5O11P  | -4     | C03794  |
| cpd00533    | dcdp        | dCDP                                                            | C9H12N3O10P2  | -3     | C00705  |
| cpd00206    | dcmp        | dCMP                                                            | C9H12N3O7P    | -2     | C00239  |
| cpd00356    | dctp        | dCTP                                                            | C9H12N3O13P3  | -4     | C00458  |
| cpd00654    | dcyt        | Deoxycytidine                                                   | C9H13N3O4     | 0      | C00881  |
| cpd11468    | ddcaACP     | Dodecanoyl-ACP (n-C12:0ACP)                                     | C23H43N2O8PRS | -1     | C05223  |
|             | dextran40   | Dextran 40, 1,6-alpha-D-Glucan                                  | C480H800O400  | 0      | C00372  |

| SEED Met ID | BIGG Met ID | Name                                                                        | Formula        | Charge | KEGG ID |
|-------------|-------------|-----------------------------------------------------------------------------|----------------|--------|---------|
| cpd00295    | dgdp        | dGDP                                                                        | C10H12N5O10P2  | -3     | C00361  |
| cpd00296    | dgmp        | dGMP                                                                        | C10H12N5O7P    | -2     | C00362  |
| cpd00277    | dgsn        | Deoxyguanosine                                                              | C10H13N5O4     | 0      | C00330  |
| cpd00241    | dgtg        | dGTP                                                                        | C10H12N5O13P3  | -4     | C00286  |
| cpd00157    | dha         | Dihydroxyacetone                                                            | C3H6O3         | 0      | C00184  |
| cpd00095    | dhap        | Dihydroxyacetone phosphate                                                  | C3H5O6P        | -2     | C00111  |
| cpd00330    | dhf         | 7,8-Dihydrofolate                                                           | C19H19N7O6     | -2     | C00415  |
| cpd00449    | dhlam       | Dihydrolipoamide                                                            | C8H17NOS2      | 0      | C00579  |
| cpd12225    | dhlpro      | Dihydrolipolprotein                                                         | H2S2X          | 0      | C02972  |
| cpd02295    | dhna        | 1,4-Dihydroxy-2-naphthoate                                                  | C11H7O4        | -1     | C03657  |
| cpd02961    | dhnpt       | Dihydroneopterin                                                            | C9H13N5O4      | 0      | C04874  |
| cpd00282    | dhor-S      | (S)-Dihydroorotate                                                          | C5H5N2O4       | -1     | C00337  |
| cpd00683    | dhpt        | Dihydropteroate                                                             | C14H13N6O3     | -1     | C00921  |
|             | dhrfap      | 7,8-dihydropterin-6-ylmethyl-4-(B-D-ribofuranosyl) aminobenzene 5-phosphate | C18H21N6O8P    | -2     |         |
| cpd03704    | dimp        | dIMP                                                                        | C10H11N4O7P    | -2     | C06196  |
| cpd03279    | din         | Deoxyinosine                                                                | C10H12N4O4     | 0      | C05512  |
| cpd00977    | ditp        | dITP                                                                        | C10H11N4O13P3  | -4     | C01345  |
|             | dkdglcn     | 2,5-Diketo-3-deoxy-D-gluconate                                              | C6H7O6         | -1     | C04349  |
| cpd02656    | dmlz        | 6,7-Dimethyl-8-(1-D-ribityl)lumazine                                        | C13H18N4O6     | 0      | C04332  |
| cpd00202    | dmpp        | Dimethylallyl diphosphate                                                   | C5H9O7P2       | -3     | C00235  |
| cpd00638    | dnad        | Deamino-NAD <sup>+</sup>                                                    | C21H24N6O15P2  | -2     | C00857  |
| cpd00655    | dpcoa       | Dephospho-CoA                                                               | C21H33N7O13P2S | -2     | C00882  |
| cpd01242    | drib        | Deoxyribose                                                                 | C5H10O4        | 0      | C01801  |

| SEED Met ID | BIGG Met ID | Name                                            | Formula        | Charge | KEGG ID |
|-------------|-------------|-------------------------------------------------|----------------|--------|---------|
|             | dsT_antigen | disialyl-T antigen                              | C36H56N3O26X   | -2     |         |
|             | dt5hsu      | 4-Deoxy-L-threo-5-hexosulose uronate            | C6H7O6         | -1     | C04053  |
| cpd01311    | dtbt        | Dethiobiotin                                    | C10H17N2O3     | -1     | C01909  |
| cpd00297    | dtdp        | dTDP                                            | C10H13N2O11P2  | -3     | C00363  |
| cpd00521    | dtdp4d6dg   | dTDP-4-dehydro-6-deoxy-D-glucose                | C16H22N2O15P2  | -2     | C11907  |
| cpd00522    | dtdp4d6dm   | dTDP-4-dehydro-6-deoxy-L-mannose                | C16H22N2O15P2  | -2     | C00688  |
| cpd00626    | dtdpglu     | dTDPglucose                                     | C16H24N2O16P2  | -2     | C00842  |
| cpd02113    | dtdprmn     | dTDP-L-rhamnose                                 | C16H24N2O15P2  | -2     | C03319  |
| cpd00298    | dtmp        | dTMP                                            | C10H13N2O8P    | -2     | C00364  |
| cpd00357    | dttp        | dTTP                                            | C10H13N2O14P3  | -4     | C00459  |
| cpd00978    | dudp        | dUDP                                            | C9H11N2O11P2   | -3     | C01346  |
| cpd00299    | dump        | dUMP                                            | C9H11N2O8P     | -2     | C00365  |
| cpd00412    | duri        | Deoxyuridine                                    | C9H12N2O5      | 0      | C00526  |
| cpd00358    | dutp        | dUTP                                            | C9H11N2O14P3   | -4     | C00460  |
| cpd08289    | dxyl5p      | 1-deoxy-D-xylulose 5-phosphate                  | C5H9O7P        | -2     | C11437  |
|             | e3mmal      | D-erythro-3-Methylmalate                        | C5H6O5         | -2     |         |
| cpd01974    | e4hglu      | L-erythro-4-Hydroxyglutamate                    | C5H8NO5        | -1     | C05947  |
| cpd00236    | e4p         | D-Erythrose 4-phosphate                         | C4H7O7P        | -2     | C00279  |
|             | egACPM      | Enoylglutaryl-ACP methyl ester                  | C17H27N2O10PRS | -1     |         |
| cpd02843    | eig3p       | D-erythro-1-(Imidazol-4-yl)glycerol 3-phosphate | C6H9N2O6P      | -2     | C04666  |
|             | epACPM      | Enoylpimeloyl-ACP methyl ester                  | C19H31N2O10PRS | -1     |         |
| cpd00162    | etha        | Ethanolamine                                    | C2H8NO         | 1      | C00189  |
| cpd00363    | etoh        | Ethanol                                         | C2H6O          | 0      | C00469  |

| SEED Met ID | BIGG Met ID | Name                                          | Formula        | Charge | KEGG ID |
|-------------|-------------|-----------------------------------------------|----------------|--------|---------|
|             | f1a         | F1alpha                                       | C22H37N2O15X   | 0      |         |
| cpd00802    | f1p         | D-Fructose 1-phosphate                        | C6H11O9P       | -2     | C02976  |
| cpd00072    | f6p         | D-Fructose 6-phosphate                        | C6H11O9P       | -2     | C00085  |
| cpd11430    | fa1         | Fatty acid (Iso-C14:0)                        | C14H27O2       | -1     |         |
| cpd11431    | fa11        | Fatty acid (Iso-C17:0)                        | C17H33O2       | -1     |         |
| cpd11433    | fa12        | Fatty acid (Anteiso-C17:0)                    | C17H33O2       | -1     |         |
| cpd11436    | fa3         | Fatty acid (Iso-C15:0)                        | C15H29O2       | -1     |         |
| cpd11438    | fa4         | Fatty acid (Anteiso-C15:0)                    | C15H29O2       | -1     |         |
| cpd11440    | fa6         | Fatty acid (iso-C16:0)                        | C16H31O2       | -1     |         |
| cpd00015    | fad         | Flavin adenine dinucleotide oxidized          | C27H31N9O15P2  | -2     | C00016  |
| cpd00982    | fadh2       | Flavin adenine dinucleotide reduced           | C27H33N9O15P2  | -2     | C01352  |
| cpd00806    | fc1p        | L-Fuculose 1-phosphate                        | C6H11O8P       | -2     | C01099  |
| cpd01186    | fc1-L       | L-fuculose                                    | C6H12O5        | 0      | C01721  |
|             | fdox        | ferredoxin (oxidized) 2[4Fe-4S]               | Fe8S8X         | 3      |         |
| cpd00290    | fdp         | D-Fructose 1,6-bisphosphate                   | C6H10O12P2     | -4     | C00354  |
|             | fdred       | ferredoxin (reduced) 2[4Fe-4S]                | Fe8S8X         | 2      |         |
| cpd11621    | fdxox       | Oxidized ferredoxin                           | X              | 0      | C00139  |
| cpd11620    | fdxrd       | Reduced ferredoxin                            | XH2            | 0      | C00138  |
| cpd10515    | fe2         | Fe2+                                          | Fe             | 2      | C00023  |
| cpd10516    | fe3         | Fe3+                                          | Fe             | 3      |         |
| cpd03725    | fe3dcit     | Fe(III)dicitrate                              | C12H10FeO14    | -3     | C06229  |
| cpd02678    | fgam        | N2-Formyl-N1-(5-phospho-D-ribosyl)glycinamide | C8H13N2O9P     | -2     | C04376  |
| cpd00109    | ficytcc553  | Ferricytochrome c-553                         | C42H54FeN8O6S2 | 3      |         |

| SEED Met ID | BIGG Met ID  | Name                                                         | Formula        | Charge | KEGG ID |
|-------------|--------------|--------------------------------------------------------------|----------------|--------|---------|
| cpd00050    | fmn          | FMN                                                          | C17H19N4O9P    | -2     | C00061  |
| cpd00110    | focytcc553   | Ferrocyclochrome c-553                                       | C42H54FeN8O6S2 | 2      | C01071  |
| cpd00393    | fol          | Folate                                                       | C19H18N7O6     | -1     | C00504  |
| cpd00047    | for          | Formate                                                      | CH1O2          | -1     | C00058  |
| cpd00344    | forflu       | N-Formimidoyl-L-glutamate                                    | C6H8N2O4       | -2     | C00439  |
| cpd02826    | fpram        | 2-(Formamido)-N1-(5-phospho-D-ribosyl)acetamidine            | C8H15N3O8P     | -1     | C04640  |
| cpd02884    | fprica       | 5-Formamido-1-(5-phospho-D-ribosyl)imidazole-4-carboxamide   | C10H13N4O9P    | -2     | C04734  |
| cpd00350    | frdp         | Farnesyl diphosphate                                         | C15H25O7P2     | -3     | C00448  |
| cpd00082    | fru          | D-Fructose                                                   | C6H12O6        | 0      | C00095  |
| cpd00672    | fruor        | D-Fructuronate                                               | C6H9O7         | -1     | C00905  |
|             | fuc1p-L      | L-Fucose 1-phosphate                                         | C6H11O8P       | -2     | C02985  |
| cpd00751    | fuc-L        | L-Fucose                                                     | C6H12O5        | 0      | C01019  |
|             | fucneulacnhx | monofucosyl-monosialyl-lacto-N-hexaose (HMO, PMID: 17002410) | C57H94N3O43    | -1     |         |
| cpd00106    | fum          | Fumarate                                                     | C4H2O4         | -2     | C00122  |
| cpd00089    | g1p          | D-Glucose 1-phosphate                                        | C6H11O9P       | -2     | C00103  |
| cpd00501    | g1p-B        | beta D-Glucose 1-phosphate                                   | C6H11O9P       | -2     | C00663  |
| cpd00102    | g3p          | Glyceraldehyde 3-phosphate                                   | C3H5O6P        | -2     | C00661  |
| cpd00507    | g3pc         | sn-Glycero-3-phosphocholine                                  | C8H20NO6P      | 0      | C00670  |
| cpd00908    | g3pe         | sn-Glycero-3-phosphoethanolamine                             | C5H14NO6P      | 0      | C01233  |
| cpd02090    | g3pg         | Glycerophosphoglycerol                                       | C6H14O8P       | -1     | C03274  |
| cpd00079    | g6p          | D-Glucose 6-phosphate                                        | C6H11O9P       | -2     | C00092  |
| cpd00863    | g6p-B        | beta-D-glucose 6-phosphate                                   | C6H11O9P       | -2     | C01172  |
|             | gACPM        | Glutaryl-ACP methyl ester                                    | C17H29N2O10PRS | -1     |         |

| SEED Met ID | BIGG Met ID | Name                                   | Formula       | Charge | KEGG ID |
|-------------|-------------|----------------------------------------|---------------|--------|---------|
| cpd00108    | gal         | D-Galactose                            | C6H12O6       | 0      | C00124  |
| cpd00348    | gal1p       | alpha-D-Galactose 1-phosphate          | C6H11O9P      | -2     | C00446  |
|             | galam       | D-Galactosamine                        | C6H13NO5      | 0      | C02262  |
|             | galam6p     | D-galactosamine-6-phosphate            | C6H13NO8P     | -1     |         |
|             | galctn-D    | D-Galactonate                          | C6H11O7       | -1     |         |
| cpd00280    | galur       | D-Galacturonate                        | C6H9O7        | -1     | C00333  |
|             | gam         | D-Glucosamine                          | C6H14NO5      | 1      | C00329  |
|             | gam1p       | D-Glucosamine 1-phosphate              | C6H13NO8P     | -1     | C06156  |
|             | gam26s      | Glucosamine 2,6-sulfate                | C6H11NO11S2   | -2     |         |
| cpd00288    | gam6p       | D-Glucosamine 6-phosphate              | C6H13NO8P     | -1     | C00352  |
| cpd02394    | gar         | N1-(5-Phospho-D-ribose)glycinamide     | C7H14N2O8P    | -1     | C03838  |
| cpd00229    | gcald       | Glycolaldehyde                         | C2H4O2        | 0      | C00266  |
|             | gchola      | glycocholate                           | C26H43NO6     | 0      | C01921  |
| cpd00031    | gdp         | GDP                                    | C10H12N5O11P2 | -3     | C00035  |
| cpd00900    | gdppdman    | GDP-4-dehydro-6-deoxy-D-mannose        | C16H21N5O15P2 | -2     | C01222  |
| cpd00272    | gdpfuc      | GDP-L-fucose                           | C16H23N5O15P2 | -2     | C00325  |
| cpd00083    | gdpmann     | GDP-D-mannose                          | C16H23N5O16P2 | -2     | C00096  |
| cpd02740    | gdptp       | Guanosine 3-diphosphate 5-triphosphate | C10H11N5O20P5 | -7     | C04494  |
| cpd00289    | ggdp        | Geranylgeranyl diphosphate             | C20H33O7P2    | -3     | C00353  |
| cpd00190    | glc-bD      | beta D-glucose                         | C6H12O6       | 0      |         |
| cpd00027    | glc-D       | D-Glucose                              | C6H12O6       | 0      | C00031  |
| cpd00164    | glcur       | D-Glucuronate                          | C6H9O7        | -1     | C00191  |
| cpd00053    | gln-L       | L-Glutamine                            | C5H10N2O3     | 0      | C00064  |

| SEED Met ID | BIGG Met ID  | Name                                                 | Formula          | Charge | KEGG ID |
|-------------|--------------|------------------------------------------------------|------------------|--------|---------|
| cpd02097    | glu5p        | L-Glutamate 5-phosphate                              | C5H8NO7P         | -2     | C03287  |
| cpd00858    | glu5sa       | L-Glutamate 5-semialdehyde                           | C5H9NO3          | 0      | C01165  |
| cpd00186    | glu-D        | D-Glutamate                                          | C5H8NO4          | -1     | C00217  |
| cpd00023    | glu-L        | L-Glutamate                                          | C5H8NO4          | -1     | C00025  |
| cpd00040    | glx          | Glyoxylate                                           | C2H1O3           | -1     | C00048  |
| cpd00033    | gly          | Glycine                                              | C2H5NO2          | 0      | C00037  |
| cpd00448    | glyald       | D-Glyceraldehyde                                     | C3H6O3           | 0      | C00577  |
|             | glyasn       | Glycyl-L-asparagine                                  | C6H11N3O4        | 0      |         |
|             | glyasp       | Glycyl-L-aspartate                                   | C6H9N2O5         | -1     |         |
| cpd00540    | glyb         | Glycine betaine                                      | C5H11NO2         | 0      | C00719  |
| cpd00100    | glyc         | Glycerol                                             | C3H8O3           | 0      | C00116  |
| cpd00080    | glyc3p       | Glycerol 3-phosphate                                 | C3H7O6P          | -2     | C00093  |
| cpd00139    | glyclt       | Glycolate                                            | C2H3O3           | -1     | C00160  |
| cpd00155    | glycogen     | glycogen                                             | C6H10O5          | 0      | C00182  |
|             | glycogen1500 | glycogen (n=1500 repeat units) (glc alpha 1,4/6 glc) | C9000H15002O7501 | 0      |         |
| cpd00223    | glyc-R       | (R)-Glycerate                                        | C3H5O4           | -1     | C00258  |
|             | glygln       | Glycyl-L-glutamine                                   | C7H13N3O4        | 0      |         |
|             | glyglu       | Glycyl-L-glutamate                                   | C7H11N2O5        | -1     |         |
|             | glygly       | Glycyl-glycine                                       | C4H8N2O3         | 0      | C02037  |
| cpd15604    | glyleu       | Glycylleucine                                        | C8H16N2O3        | 0      | C02155  |
|             | glymet       | Glycyl-L-methionine                                  | C7H14N2O3S       | 0      |         |
|             | glyphe       | Glycylphenylalanine                                  | C11H14N2O3       | 0      |         |
| cpd11588    | glypro       | Glycylproline                                        | C7H12N2O3        | 0      |         |

| SEED Met ID | BIGG Met ID | Name                                           | Formula       | Charge | KEGG ID |
|-------------|-------------|------------------------------------------------|---------------|--------|---------|
|             | glytyr      | Glycyl-L-tyrosine                              | C11H14N2O4    | 0      |         |
|             | gmhep17bp   | D-Glycero-D-manno-heptose 1,7-bisphosphate     | C7H12O13P2    | -4     | C11472  |
|             | gmhep1p     | D-Glycero-D-manno-heptose 1-phosphate          | C7H13O10P     | -2     | C07838  |
| cpd04918    | gmhep7p     | D-Glycero-D-manno-heptose 7-phosphate          | C7H13O10P     | -2     | C07836  |
| cpd00126    | gmp         | GMP                                            | C10H12N5O8P   | -2     | C00144  |
|             | gncore1     | GlcNAc-alpha-1,4-Core 1                        | C22H37N2O15X  | 0      |         |
|             | gncore2     | GlcNAc-alpha-1,4-Core 2                        | C30H50N3O20X  | 0      |         |
| cpd00283    | grdp        | Geranyl diphosphate                            | C10H17O7P2    | -3     | C00341  |
| cpd00311    | gsn         | Guanosine                                      | C10H13N5O5    | 0      | C00387  |
| cpd00042    | gthrd       | Reduced glutathione                            | C10H16N3O6S   | -1     | C00051  |
| cpd00038    | gtp         | GTP                                            | C10H12N5O14P3 | -4     | C00044  |
| cpd00207    | gua         | Guanine                                        | C5H5N5O       | 0      | C00242  |
| cpd00067    | h           | proton                                         | H             | 1      | C00080  |
| cpd11640    | h2          | H2                                             | H2            | 0      | C00282  |
| cpd08615    | h2mb4p      | 1-hydroxy-2-methyl-2-(E)-butenyl 4-diphosphate | C5H9O8P2      | -3     | C11811  |
| cpd00001    | h2o         | H2O                                            | H2O           | 0      | C00001  |
| cpd00025    | h2o2        | Hydrogen peroxide                              | H2O2          | 0      | C00027  |
| cpd00239    | h2s         | Hydrogen sulfide                               | H2S           | 0      | C00283  |
|             | ha          | hyaluronan                                     | C28H40N2O22   | 0      | C00518  |
|             | ha_deg1     | hyaluronan degradation product 1               | C22H33N2O16   | -1     |         |
|             | ha_pre1     | hyaluronan biosynthesis, precursor 1           | C14H20NO11    | -1     |         |
| cpd00242    | hco3        | Bicarbonate                                    | CHO3          | -1     | C00288  |
| cpd00135    | hcys-L      | L-Homocysteine                                 | C4H9NO2S      | 0      | C00155  |

| SEED Met ID | BIGG Met ID  | Name                                                                                                                                                                                                                          | Formula           | Charge | KEGG ID |
|-------------|--------------|-------------------------------------------------------------------------------------------------------------------------------------------------------------------------------------------------------------------------------|-------------------|--------|---------|
| cpd00214    | hdca         | Hexadecanoate (n-C16:0)                                                                                                                                                                                                       | C16H31O2          | -1     | C00249  |
| cpd15237    | hdcea        | Hexadecenoate (n-C16:1)                                                                                                                                                                                                       | C16H29O2          | -1     |         |
| cpd15238    | hdcoa        | Hexadecenoyl-CoA (n-C16:1CoA)                                                                                                                                                                                                 | C37H60N7O17P3S    | -4     |         |
| cpd15239    | hdeACP       | cis-hexadec-9-enoyl-[acyl-carrier protein] (n-C16:1)                                                                                                                                                                          | C27H49N2O8PRS     | -1     |         |
| cpd02590    | hepdp        | all-trans-Heptaprenyl diphosphate                                                                                                                                                                                             | C35H57O7P2        | -3     | C04216  |
| cpd11472    | hexACP       | Hexanoyl-ACP (n-C6:0ACP)                                                                                                                                                                                                      | C17H31N2O8PRS     | -1     | C05749  |
| cpd00906    | hexdp        | all-trans-Hexaprenyl diphosphate                                                                                                                                                                                              | C30H49O7P2        | -3     | C01230  |
| cpd00531    | hg2          | Hg2+                                                                                                                                                                                                                          | Hg                | 2      | C00703  |
| cpd00119    | his-L        | L-Histidine                                                                                                                                                                                                                   | C6H9N3O2          | 0      | C00135  |
| cpd00807    | hisp         | L-Histidinol phosphate                                                                                                                                                                                                        | C6H11N3O4P        | -1     | C01100  |
| cpd00641    | histd        | L-Histidinol                                                                                                                                                                                                                  | C6H12N3O          | 1      | C00860  |
| cpd00227    | hom-L        | L-Homoserine                                                                                                                                                                                                                  | C4H9NO3           | 0      | C00263  |
|             | homogal      | Homogalacturonan, 100 galacturonate residues. Assumed to be methylated/ acetylated in every 5th residue. Citrus HG consists of 72-100 galacturonate residues and has a methylesterification degree of 22,9% (PMID: 11278866). | C660H840O660      | -120   |         |
|             | hpyr         | Hydroxypyruvate                                                                                                                                                                                                               | C3H3O4            | -1     | C00168  |
|             | hspg         | heparan sulfate proteoglycan                                                                                                                                                                                                  | C79H113N5O101S12X | -13    |         |
|             | hspg_degr_1  | Product 1 HEPARL1_e, IdoA-GlcN2,6diS-GlcA-GlcN2,3,6triS                                                                                                                                                                       | C24H33O36N2S5     | -7     |         |
|             | hspg_degr_10 | Product AS3TASE_HS2, GlcN2S-IdoA-GlcNAc-GlcA-Gal-Gal-Xyl-L-Ser (protein)                                                                                                                                                      | C43H66N2O38SX     | -3     |         |
|             | hspg_degr_11 | Product GAM2STASE_HS3, GlcN-IdoA-GlcNAc-GlcA-Gal-Gal-Xyl-L-Ser (protein)                                                                                                                                                      | C43H67N2O35X      | -2     |         |
|             | hspg_degr_12 | Product GLCNACASE_HS2, GlcA-GlcNAc-IdoA-Gal-Gal-Xyl-L-Ser (protein)                                                                                                                                                           | C37H56NO31X       | -2     |         |
|             | hspg_degr_13 | Product GLCAASE_HS, GlcNAc-IdoA-Gal-Gal-Xyl-L-Ser (protein)                                                                                                                                                                   | C31H49NO25X       | -1     |         |
|             | hspg_degr_14 | Product GLCNACASE_HS3, IdoA-Gal-Gal-Xyl-L-Ser (protein)                                                                                                                                                                       | C23H36O20X        | -1     |         |
|             | hspg_degr_15 | Product IDOURASE_HS3, Gal-Gal-Xyl-L-Ser (protein)                                                                                                                                                                             | C17H29O14X        | 0      |         |

| SEED Met ID | BIGG Met ID | Name                                                                                    | Formula        | Charge | KEGG ID |
|-------------|-------------|-----------------------------------------------------------------------------------------|----------------|--------|---------|
|             | hspg_degr_2 | Product 2 HEPARL1_e, IdoA2S-GlcN2,6diS-IdoA2S-GlcNAc3S-GlcA-Gal-Gal-Xyl-L-Ser (protein) | C49H71N2O56S5X | -6     |         |
|             | hspg_degr_3 | Product IDOURASE_HS1, GlcN2,6diS-GlcA-GlcN2,3,6triS                                     | C18H26O30N2S5  | -6     |         |
|             | hspg_degr_4 | Product AS6TASE_HS1, GlcN2S-GlcA-GlcN2,3diS                                             | C18H28O24N2S3  | -4     |         |
|             | hspg_degr_5 | Product AS3TASE_HS1, GlcN2S-GlcA-GlcN2S                                                 | C18H29O21N2S2  | -3     |         |
|             | hspg_degr_6 | Product GAM2STASE_HS2, GlcN-GlcA-GlcN                                                   | C18H31O15N2    | -1     |         |
|             | hspg_degr_7 | Product IS2TASE_HS1, IdoA-GlcN2,6diS-IdoA-GlcNAc3S-GlcA-Gal-Gal-Xyl-L-Ser (protein)     | C49H71N2O50S3X | -6     |         |
|             | hspg_degr_8 | Product IDOURASE_HS2, GlcN2,6diS-IdoA-GlcNAc3S-GlcA-Gal-Gal-Xyl-L-Ser (protein)         | C43H64N2O44S3X | -5     |         |
|             | hspg_degr_9 | Product AS6TASE_HS2, GlcN2S-IdoA-GlcNAc3S-GlcA-Gal-Gal-Xyl-L-Ser (protein)              | C43H65N2O41S2X | -4     |         |
|             | hspg_rest   | Undegradable product GALASE_HS, Xyl-L-Ser (protein)                                     | C5H9O4X        | 0      |         |
| cpd00226    | hxan        | Hypoxanthine                                                                            | C5H4N4O        | 0      | C00262  |
| cpd03470    | iasp        | Iminoaspartate                                                                          | C4H3NO4        | -2     | C05840  |
| cpd00481    | ibcoa       | Isobutyryl-CoA                                                                          | C25H38N7O17P3S | -4     | C00630  |
| cpd00658    | ichor       | Isochorismate                                                                           | C10H8O6        | -2     | C00885  |
| cpd00260    | icit        | Isocitrate                                                                              | C6H5O7         | -3     | C00311  |
|             | idour       | L-Iduronate                                                                             | C6H9O7         | -1     | C06472  |
| cpd00090    | idp         | IDP                                                                                     | C10H11N4O11P2  | -3     | C00104  |
| cpd11441    | ihdcoa      | fa6coa,Iso-C16:0 CoA Isohexadecanoyl-CoA                                                | C37H62N7O17P3S | -4     |         |
| cpd11432    | ihpdcoa     | fa11coa, Iso-C17:0 CoA Isoheptadecanoyl-CoA                                             | C38H64N7O17P3S | -4     |         |
| cpd00322    | ile-L       | L-Isoleucine                                                                            | C6H13NO2       | 0      | C00407  |
| cpd00930    | imacp       | 3-(Imidazol-4-yl)-2-oxopropyl phosphate                                                 | C6H7N2O5P      | -2     | C01267  |
| cpd00114    | imp         | IMP                                                                                     | C10H11N4O8P    | -2     | C00130  |
| cpd00359    | indole      | Indole                                                                                  | C8H7N          | 0      | C00463  |
| cpd00121    | inost       | myo-Inositol                                                                            | C6H12O6        | 0      | C00137  |

| SEED Met ID | BIGG Met ID   | Name                                                                      | Formula         | Charge | KEGG ID |
|-------------|---------------|---------------------------------------------------------------------------|-----------------|--------|---------|
| cpd00246    | ins           | Inosine                                                                   | C10H12N4O5      | 0      | C00294  |
|             | inulin        | Chicory inulin, 30 monosaccharide units (29 fru, 1 glc) on average        | C180H302O151    | 0      | C03323  |
| cpd11437    | ipdcoa        | fa3coa,Iso-C15:0 CoA Isopentadecanoyl-CoA                                 | C36H60N7O17P3S  | -4     |         |
| cpd00113    | ipdp          | Isopentenyl diphosphate                                                   | C5H9O7P2        | -3     | C00129  |
|             | isobut        | Isobutyrate, 2-Methylpropanoate                                           | C4H7O2          | -1     | C02632  |
|             | isocapr       | Isocaproate                                                               | C6H11O2         | -1     |         |
|             | isoval        | Isovalerate, 3-Methylbutanoate                                            | C5H9O2          | -1     | C08262  |
| cpd11435    | itdcoa        | fa1coa,Iso-C14:0 CoA Isotetradecanoyl-CoA                                 | C35H58N7O17P3S  | -4     |         |
| cpd00068    | itp           | ITP                                                                       | C10H11N4O14P3   | -4     | C00081  |
| cpd01882    | ivcoa         | Isovaleryl-CoA                                                            | C26H40N7O17P3S  | -4     | C02939  |
| cpd00205    | k             | potassium                                                                 | K               | 1      | C00238  |
|             | kdn           | 2-keto-3-deoxy-D-glycero-D-galactononic acid                              | C9H15O9         | -1     |         |
|             | kdnP          | 2-keto-3-deoxy-D-glycero-D-galactononic acid 9-phosphate                  | C9H14O12P       | -3     |         |
| cpd00875    | kdo           | 3-Deoxy-D-manno-2-octulosonate                                            | C8H13O8         | -1     | C01187  |
| cpd02730    | kdo8p         | 3-Deoxy-D-manno-octulosonate 8-phosphate                                  | C8H12O11P       | -3     | C04478  |
|             | kdolipid4_bt  | KDO-lipid IV(A)_BT                                                        | C88H160N2O29P2  | -5     |         |
|             | kdolipid4L_bt | KDO-lipid IV(A)_BT                                                        | C100H182N2O30P2 | -5     |         |
|             | kesto         | Kestose (2 fru, 1 glc inulin-type fructo-oligosaccharide)                 | C18H32O16       | 0      |         |
|             | kestopt       | Kestopentaose (4 fru, 1 glc inulin-type fructo-oligosaccharide)           | C30H52O26       | 0      |         |
|             | kestottr      | Kestotetraose (3 fru, 1 glc inulin-type fructo-oligosaccharide)           | C24H42O21       | 0      |         |
| cpd02414    | l2a6o         | L-2-Amino-6-oxopimelate                                                   | C7H10NO5        | -1     | C03871  |
|             | l2n2m2mn      | de-Fuc, reducing GlcNAc removed, de-Sia form of PA6 (w/o peptide linkage) | C54H91N3O41     | 0      |         |
| cpd00221    | lac-D         | D-Lactate                                                                 | C3H5O3          | -1     | C00256  |

| SEED Met ID | BIGG Met ID | Name                                         | Formula          | Charge | KEGG ID |
|-------------|-------------|----------------------------------------------|------------------|--------|---------|
|             | lacdfucttr  | Lactodifucotetraose (HMO, PMID:11425797)     | C24H42O19        | 0      | G00335  |
| cpd00159    | lac-L       | L-Lactate                                    | C3H5O3           | -1     | C00186  |
|             | lacndfuchx  | Lacto-N-difucohexaose (HMO, PMID:11425797)   | C38H65NO29       | 0      | G00891  |
|             | lacnfucpt   | Lacto-N-fucopentaose (HMO, PMID:11425797)    | C32H55NO25       | 0      | G00557  |
|             | lacnnttr    | Lacto-N-neotetraose (HMO, PMID:11425797)     | C26H45NO21       | 0      | G00536  |
|             | lacnttr     | Lacto-N-tetraose (HMO, PMID:11425797)        | C26H45NO21       | 0      | C06371  |
| cpd00334    | lald-L      | L-Lactaldehyde                               | C3H6O2           | 0      | C00424  |
| cpd00616    | Largn       | L-Arogenate                                  | C10H13NO5        | 0      | C00826  |
| cpd00208    | lcts        | Lactose                                      | C12H22O11        | 0      | C00243  |
|             | leugly      | Leucylglycine                                | C8H16N2O3        | 0      |         |
| cpd00107    | leu-L       | L-Leucine                                    | C6H13NO2         | 0      | C00123  |
|             | leuleu      | Leucylleucine                                | C12H24N2O3       | 0      |         |
|             | levan1000   | Levan, 1000 fructose units                   | C6000H10002O5001 | 0      |         |
|             | levanb      | Levanbiose                                   | C12H22O11        | 0      |         |
|             | levanttr    | Levantriose                                  | C18H32O16        | 0      |         |
|             | levantttr   | Levantetraose                                | C24H42O21        | 0      |         |
| cpd02182    | lgt-S       | (R)-S-Lactoylglutathione                     | C13H20N3O8S      | -1     | C03451  |
|             | lipidA_bt   | lipidA_BT                                    | C78H146N2O23P2   | -4     |         |
|             | lipidAds_bt | lipidAds_BT                                  | C78H147N2O20P    | -2     |         |
|             | lipidX_bt   | lipidX_BT                                    | C39H74NO12P      | -2     |         |
|             | lmn2        | Laminaribiose                                | C12H22O11        | 0      |         |
|             | lmn30       | laminarin (n=30 repeat units, beta -1,3 glc) | C180H302O151     | 0      |         |
| cpd00213    | lpam        | Lipoamide                                    | C8H15NOS2        | 0      | C00248  |

| SEED Met ID | BIGG Met ID | Name                                                    | Formula          | Charge | KEGG ID |
|-------------|-------------|---------------------------------------------------------|------------------|--------|---------|
| cpd12005    | lpro        | Lipoylprotein                                           | S2X              | 0      | C02051  |
|             | lps_bt      | Lipopolysaccharide (B. thetaiotaomicron specific)       | C198H360N4O109P3 | 8      |         |
| cpd00039    | lys-L       | L-Lysine                                                | C6H15N2O2        | 1      | C00047  |
|             | m2mn        | (alpha-D-mannosyl)2-beta-D-mannosyl-N-acetylglucosamine | C26H45NO21       | 0      |         |
| cpd11492    | malACP      | Malonyl-[acyl-carrier protein]                          | C14H22N2O10PRS   | -2     | C01209  |
| cpd00070    | malcoa      | Malonyl-CoA                                             | C24H33N7O19P3S   | -5     | C00083  |
|             | malcoam     | Malonyl-CoA methyl ester                                | C25H36N7O19P3S   | -4     |         |
| cpd00130    | mal-L       | L-Malate                                                | C4H4O5           | -2     | C00149  |
| cpd00179    | malt        | Maltose                                                 | C12H22O11        | 0      | C00208  |
| cpd15494    | malthp      | Maltoheptaose                                           | C42H72O36        | 0      |         |
| cpd01329    | malthx      | Maltohexaose                                            | C36H62O31        | 0      | C01936  |
| cpd15495    | maltpt      | Maltopentaose                                           | C30H52O26        | 0      |         |
| cpd01262    | malttr      | Maltotriose                                             | C18H32O16        | 0      | C01835  |
| cpd01399    | malttr      | Maltotetraose                                           | C24H42O21        | 0      | C02052  |
|             | man         | D-Mannose                                               | C6H12O6          | 0      | C00159  |
| cpd00485    | man1p       | D-Mannose 1-phosphate                                   | C6H11O9P         | -2     | C03812  |
| cpd00235    | man6p       | D-Mannose 6-phosphate                                   | C6H11O9P         | -2     | C00275  |
| cpd00403    | mana        | D-Mannonate                                             | C6H11O7          | -1     | C00514  |
|             | manb        | Mannobiose (beta-1,4)                                   | C12H22O11        | 0      |         |
|             | manpt       | mannopentaose                                           | C30H52O26        | 0      |         |
| cpd03200    | mantr       | mannotriose (beta-1,4)                                  | C18H32O16        | 0      | C05404  |
|             | mantr       | mannotetraose                                           | C24H42O21        | 0      |         |
| cpd03198    | melib       | Melibiose                                               | C12H22O11        | 0      | C05402  |

| SEED Met ID | BIGG Met ID | Name                                 | Formula        | Charge | KEGG ID |
|-------------|-------------|--------------------------------------|----------------|--------|---------|
| cpd00116    | meoh        | Methanol                             | CH4O1          | 0      | C00132  |
|             | metala      | L-methionyl-L-alanine                | C8H15N2O3S     | 0      |         |
| cpd00347    | methf       | 5,10-Methenyltetrahydrofolate        | C20H20N7O6     | -1     | C00445  |
| cpd00060    | met-L       | L-Methionine                         | C5H11NO2S      | 0      | C00073  |
| cpd01914    | metsox-S-L  | L-Methionine Sulfoxide               | C5H11NO3S      | 0      | C02989  |
| cpd00254    | mg2         | magnesium                            | Mg             | 2      | C00305  |
| cpd00867    | mi1p-D      | 1D-myo-Inositol 1-phosphate          | C6H11O9P       | -2     | C01177  |
| cpd02484    | mi3p-D      | 1D-myo-Inositol 3-phosphate          | C6H11O9P       | -2     | C04006  |
| cpd02230    | mi4p-D      | 1D-myo-Inositol 4-phosphate          | C6H11O9P       | -2     | C03546  |
| cpd00125    | mlthf       | 5,10-Methylenetetrahydrofolate       | C20H21N7O6     | -2     | C00143  |
| cpd00891    | mmcoa-R     | (R)-Methylmalonyl-CoA                | C25H35N7O19P3S | -5     | C01213  |
| cpd00519    | mmcoa-S     | (S)-Methylmalonyl-CoA                | C25H35N7O19P3S | -5     | C00683  |
|             | mn          | beta-1,4-mannose-N-acetylglucosamine | C14H25NO11     | 0      |         |
| cpd00030    | mn2         | Mn2+                                 | Mn             | 2      | C00034  |
|             | mql10       | Menaquinol 10                        | C61H90O2       | 0      | C05819  |
|             | mql11       | Menaquinol 11                        | C66H98O2       | 0      | C05819  |
|             | mql7        | Menaquinol 7                         | C46H66O2       | 0      | C05819  |
| cpd15499    | mql8        | Menaquinol 8                         | C51H74O2       | 0      | C05819  |
|             | mql9        | Menaquinol 9                         | C56H82O2       | 0      | C05819  |
|             | mqn10       | Menaquinone 10                       | C61H88O2       | 0      | C00828  |
|             | mqn11       | Menaquinone 11                       | C66H96O2       | 0      | C00828  |
|             | mqn7        | Menaquinone 7                        | C46H64O2       | 0      | C00828  |
| cpd15500    | mqn8        | Menaquinone 8                        | C51H72O2       | 0      | C00828  |

| SEED Met ID | BIGG Met ID | Name                                                                              | Formula       | Charge | KEGG ID |
|-------------|-------------|-----------------------------------------------------------------------------------|---------------|--------|---------|
|             | mqn9        | Menaquinone 9                                                                     | C56H80O2      | 0      | C00828  |
| cpd00428    | methgxl     | Methylglyoxal                                                                     | C3H4O2        | 0      | C00546  |
| cpd11466    | myrsACP     | Myristoyl-ACP (n-C14:0ACP)                                                        | C25H47N2O8PRS | -1     | C05761  |
| cpd00470    | N1aspmid    | N1-Acetylspermidine                                                               | C9H23N3O      | 2      | C00612  |
|             | n2m2mn      | de-Fuc, reducing GlcNAc removed, de-Sia, de-Gal form of PA6 (w/o peptide linkage) | C42H71N3O31   | 0      |         |
| cpd00758    | n8aspmid    | N8-Acetylspermidine                                                               | C9H23N3O      | 2      | C01029  |
| cpd00971    | na1         | Sodium                                                                            | Na            | 1      | C01330  |
| cpd00218    | na          | Nicotinate                                                                        | C6H4NO2       | -1     | C00253  |
| cpd00003    | na          | Nicotinamide adenine dinucleotide                                                 | C21H26N7O14P2 | -1     | C00003  |
| cpd00004    | na          | Nicotinamide adenine dinucleotide - reduced                                       | C21H27N7O14P2 | -2     | C00004  |
| cpd00006    | na          | Nicotinamide adenine dinucleotide phosphate                                       | C21H25N7O17P3 | -3     | C00006  |
| cpd00005    | na          | Nicotinamide adenine dinucleotide phosphate - reduced                             | C21H26N7O17P3 | -4     | C00005  |
| cpd00133    | na          | Nicotinamide                                                                      | C6H6N2O       | 0      | C00153  |
| cpd00341    | ncptr       | N-Carbamoylputrescine                                                             | C5H14N3O      | 1      | C00436  |
|             | neulacntr   | Sialyllacto-N-tetraose (HMO, PMID: 17002410)                                      | C37H61N2O29   | -1     |         |
| cpd00013    | nh4         | Ammonium                                                                          | H4N           | 1      | C01342  |
| cpd03471    | nicrns      | Nicotinate D-ribonucleoside                                                       | C11H13NO6     | 0      | C05841  |
| cpd00873    | nicrnt      | Nicotinate D-ribonucleotide                                                       | C11H12NO9P    | -2     | C01185  |
| cpd00355    | nmn         | NMN                                                                               | C11H14N2O8P   | -1     | C00455  |
| cpd00075    | no2         | Nitrite                                                                           | NO2           | -1     | C00088  |
| cpd00007    | o2          | O2                                                                                | O2            | 0      | C00007  |
| cpd00532    | o2s         | Superoxide anion                                                                  | O2            | -1     | C00704  |
| cpd00032    | oaa         | Oxaloacetate                                                                      | C4H2O5        | -2     | C00036  |

| SEED Met ID | BIGG Met ID | Name                                                                                      | Formula        | Charge | KEGG ID |
|-------------|-------------|-------------------------------------------------------------------------------------------|----------------|--------|---------|
| cpd11470    | ocACP       | Octanoyl-ACP (n-C8:0ACP)                                                                  | C19H35N2O8PRS  | -1     | C05752  |
| cpd01080    | ocdca       | octadecanoate (n-C18:0)                                                                   | C18H35O2       | -1     | C01530  |
| cpd11573    | ocdcaACP    | Octadecanoyl-ACP (n-C18:0ACP)                                                             | C29H55N2O8PRS  | -1     |         |
| cpd15269    | ocdcea      | octadecenoate (n-C18:1)                                                                   | C18H33O2       | -1     |         |
| cpd02557    | octdp       | all-trans-Octaprenyl diphosphate                                                          | C40H65O7P2     | -3     | C04146  |
| cpd11825    | octeACP     | cis-octadec-11-enoyl-[acyl-carrier protein] (n-C18:1)                                     | C29H53N2O8PRS  | -1     |         |
| cpd15274    | odecoa      | Octadecenoyl-CoA (n-C18:1CoA)                                                             | C39H64N7O17P3S | -4     |         |
| cpd03606    | ohpb        | 2-Oxo-3-hydroxy-4-phosphobutanoate                                                        | C4H4O8P        | -3     | C06054  |
|             | oligofru4   | Oligofructose, polymerization average 4 units of beta-2,1-fructose per chain              | C24H40O20      | 0      |         |
| cpd00064    | orn         | Ornithine                                                                                 | C5H13N2O2      | 1      | C01602  |
| cpd00247    | orot        | Orotate                                                                                   | C5H3N2O4       | -1     | C00295  |
| cpd00810    | orot5p      | Orotidine 5-phosphate                                                                     | C10H10N2O11P   | -3     | C01103  |
| cpd15521    | pa120       | 1,2-didodecanoyl-sn-glycerol 3-phosphate                                                  | C27H51O8P1     | -2     | C00416  |
| cpd15522    | pa140       | 1,2-ditetradecanoyl-sn-glycerol 3-phosphate                                               | C31H59O8P1     | -2     | C00416  |
| cpd15524    | pa160       | 1,2-dihexadecanoyl-sn-glycerol 3-phosphate                                                | C35H67O8P1     | -2     | C00416  |
| cpd15526    | pa180       | 1,2-diocadecanoyl-sn-glycerol 3-phosphate                                                 | C39H75O8P1     | -2     | C00416  |
| cpd15527    | pa181       | 1,2-diocadec-11-enoyl-sn-glycerol 3-phosphate                                             | C39H71O8P1     | -2     | C00416  |
| cpd15681    | paai15      | 1,2-dianteisopentadecanoyl-sn-glycerol 3-phosphate (12-methyl-tetradecanoyl, anteiso-C15) | C33H63O8P      | -2     | C00416  |
| cpd15678    | paai17      | 1,2-dianteisoheptadecanoyl-sn-glycerol 3-phosphate (14-methyl-hexadecanoyl, anteiso-C17)  | C37H71O8P      | -2     | C00416  |
|             | pac         | Phenylacetic acid                                                                         | C8H7O2         | -1     | C07086  |
| cpd15679    | pai14       | 1,2-diisotetradecanoyl-sn-glycerol 3-phosphate (12-methyl-tridecanoyl, iso-C14)           | C31H59O8P      | -2     | C00416  |
| cpd15680    | pai15       | 1,2-diisopentadecanoyl-sn-glycerol 3-phosphate (13-methyl-tetradecanoyl, iso-C15)         | C33H63O8P      | -2     | C00416  |
| cpd15682    | pai16       | 1,2-diisohexadecanoyl-sn-glycerol 3-phosphate (14-methyl-pentadecanoyl, iso-C16)          | C35H67O8P      | -2     | C00416  |

| SEED Met ID | BIGG Met ID | Name                                                                                                                                                                   | Formula         | Charge | KEGG ID |
|-------------|-------------|------------------------------------------------------------------------------------------------------------------------------------------------------------------------|-----------------|--------|---------|
| cpd15677    | pai17       | 1,2-diisooheptadecanoyl-sn-glycerol 3-phosphate (15-methyl-hexadecanoyl, iso-C17)                                                                                      | C37H71O8P       | -2     | C00416  |
| cpd02024    | pald        | phosphonoacetaldehyde                                                                                                                                                  | C2H3O4P         | -2     | C03167  |
| cpd11476    | palmACP     | Palmitoyl-ACP (n-C16:0ACP)                                                                                                                                             | C27H51N2O8PRS   | -1     | C05764  |
| cpd00834    | pan4p       | Pantetheine 4-phosphate                                                                                                                                                | C11H21N2O7PS    | -2     | C01134  |
| cpd00408    | pant-R      | (R)-Pantoate                                                                                                                                                           | C6H11O4         | -1     | C00522  |
| cpd00045    | pap         | Adenosine 3,5-bisphosphate                                                                                                                                             | C10H11N5O10P2   | -4     | C00054  |
| cpd00044    | paps        | 3-Phosphoadenylyl sulfate                                                                                                                                              | C10H11N5O13P2S  | -4     | C00053  |
| cpd04097    | pb          | Lead                                                                                                                                                                   | Pb              | 2      |         |
| cpd00478    | pdx5p       | Pyridoxine 5-phosphate                                                                                                                                                 | C8H10NO6P       | -2     | C00627  |
|             | pe_cer1_bt  | Ceramide phosphoethanolamine (B. thetaiotaomicron specific)                                                                                                            | C37H77N2O6P     | 0      |         |
| cpd15528    | pe120       | phosphatidylethanolamine (didodecanoyl, n-C12:0)                                                                                                                       | C29H58N1O8P1    | 0      | C00350  |
| cpd15529    | pe140       | phosphatidylethanolamine (ditetradecanoyl, n-C14:0)                                                                                                                    | C33H66N1O8P1    | 0      | C00350  |
| cpd15531    | pe160       | phosphatidylethanolamine (dihexadecanoyl, n-C16:0)                                                                                                                     | C37H74N1O8P1    | 0      | C00350  |
| cpd15533    | pe180       | phosphatidylethanolamine (dioctadecanoyl, n-C18:0)                                                                                                                     | C41H82N1O8P1    | 0      | C00350  |
| cpd15534    | pe181       | phosphatidylethanolamine (dioctadec-11-enoyl, n-C18:1)                                                                                                                 | C41H78N1O8P1    | 0      | C00350  |
| cpd15699    | peai15      | Phosphatidylethanolamine (12-methyl-tetradecanoyl, anteiso-C15)                                                                                                        | C35H70NO8P      | 0      |         |
| cpd15696    | peai17      | Phosphatidylethanolamine (14-methyl-hexadecanoyl, anteiso-C17)                                                                                                         | C39H78NO8P      | 0      |         |
|             | pect        | pectins                                                                                                                                                                | C2535H3509O2535 | -1     |         |
|             | pecticgal   | Pectic galactan (potato), gal: arab-L: rmn: galur = 78: 9: 4: 9 (www.megazyme.com). Assumed to consist of 100 sugars per macromolecule (I could not find information). | C597H971O503    | -11    |         |
|             | pectin      | Pectin                                                                                                                                                                 | C6H7O6          | -1     | C00714  |
| cpd15697    | pei14       | Phosphatidylethanolamine (12-methyl-tridecanoyl, iso-C14)                                                                                                              | C33H66NO8P      | 0      |         |
| cpd15698    | pei15       | Phosphatidylethanolamine (13-methyl-tetradecanoyl, iso-C15)                                                                                                            | C35H70NO8P      | 0      |         |

| SEED Met ID | BIGG Met ID | Name                                                                | Formula     | Charge | KEGG ID |
|-------------|-------------|---------------------------------------------------------------------|-------------|--------|---------|
| cpd15700    | pei16       | Phosphatidylethanolamine (14-methyl-pentadecanoyl, iso-C16)         | C37H74NO8P  | 0      |         |
| cpd15695    | pei17       | Phosphatidylethanolamine (15-methyl-hexadecanoyl, iso-C17)          | C39H78NO8P  | 0      |         |
| cpd02591    | pendp       | all-trans-Pentaprenyl diphosphate                                   | C25H41O7P2  | -3     | C04217  |
| cpd00061    | pep         | Phosphoenolpyruvate                                                 | C3H2O6P     | -3     | C00074  |
|             | peptido_EC  | Peptidoglycan subunit of Escherichia coli                           | C40H62N8O21 | -2     |         |
| cpd15535    | pg120       | Phosphatidylglycerol (didodecanoyl, n-C12:0)                        | C30H58O10P1 | -1     | C00344  |
| cpd15536    | pg140       | Phosphatidylglycerol (ditetradecanoyl, n-C14:0)                     | C34H66O10P1 | -1     | C00344  |
| cpd15538    | pg160       | Phosphatidylglycerol (dihexadecanoyl, n-C16:0)                      | C38H74O10P1 | -1     | C00344  |
| cpd15540    | pg180       | Phosphatidylglycerol (dioctadecanoyl, n-C18:0)                      | C42H82O10P1 | -1     | C00344  |
| cpd15541    | pg181       | Phosphatidylglycerol (dioctadec-11-enoyl, n-C18:1)                  | C42H78O10P1 | -1     | C00344  |
| cpd15726    | pgai15      | Phosphatidylglycerol (12-methyl-tetradecanoyl, anteiso-C15)         | C36H70O10P  | -1     |         |
| cpd15723    | pgai17      | Phosphatidylglycerol (14-methyl-hexadecanoyl, anteiso-C17)          | C40H78O10P  | -1     |         |
| cpd15724    | pgi14       | Phosphatidylglycerol (12-methyltridecanoyl, iso-C14)                | C34H66O10P  | -1     |         |
| cpd15725    | pgi15       | Phosphatidylglycerol (13-methyltetradecanoyl, iso-C15)              | C36H70O10P  | -1     |         |
| cpd15727    | pgi16       | Phosphatidylglycerol (14-methylpentadecanoyl, iso-C16)              | C38H74O10P  | -1     |         |
| cpd15722    | pgi17       | Phosphatidylglycerol (15-methyl-hexadecanoyl, iso-C17)              | C40H78O10P  | -1     |         |
| cpd15542    | pgp120      | Phosphatidylglycerophosphate (didodecanoyl, n-C12:0)                | C30H57O13P2 | -3     | C03892  |
| cpd15543    | pgp140      | Phosphatidylglycerophosphate (ditetradecanoyl, n-C14:0)             | C34H65O13P2 | -3     | C03892  |
| cpd15545    | pgp160      | Phosphatidylglycerophosphate (dihexadecanoyl, n-C16:0)              | C38H73O13P2 | -3     | C03892  |
| cpd15547    | pgp180      | Phosphatidylglycerophosphate (dioctadecanoyl, n-C18:0)              | C42H81O13P2 | -3     | C03892  |
| cpd15548    | pgp181      | Phosphatidylglycerophosphate (dioctadec-11-enoyl, n-C18:1)          | C42H77O13P2 | -3     | C03892  |
| cpd15720    | pgpai15     | Phosphatidylglycerophosphate (12-methyl-tetradecanoyl, anteiso-C15) | C36H69O13P2 | -3     |         |
| cpd15717    | pgpai17     | Phosphatidylglycerophosphate (14-methyl-hexadecanoyl, anteiso-C17)  | C40H77O13P2 | -3     |         |

| SEED Met ID | BIGG Met ID | Name                                                           | Formula        | Charge | KEGG ID |
|-------------|-------------|----------------------------------------------------------------|----------------|--------|---------|
| cpd15718    | pgpi14      | Phosphatidylglycerophosphate (12-methyltridecanoyl, iso-C14)   | C34H65O13P2    | -3     |         |
| cpd15719    | pgpi15      | Phosphatidylglycerophosphate (13-methyltetradecanoyl, iso-C15) | C36H69O13P2    | -3     |         |
| cpd15721    | pgpi16      | Phosphatidylglycerophosphate (14-methylpentadecanoyl, iso-C16) | C38H73O13P2    | -3     |         |
| cpd15716    | pgpi17      | Phosphatidylglycerophosphate (15-methyl-hexadecanoyl, iso-C17) | C40H77O13P2    | -3     |         |
|             | phaccoa     | Phenylacetyl-CoA                                               | C29H38N7O17P3S | -4     | C00582  |
|             | phearg      | L-phenylalanyl-L-arginine                                      | C15H24N5O3     | 1      |         |
| cpd00066    | phe-L       | L-Phenylalanine                                                | C9H11NO2       | 0      | C00079  |
|             | pHEME       | Protoheme                                                      | C34H30FeN4O4   | -2     | C00032  |
| cpd00809    | phom        | O-Phospho-L-homoserine                                         | C4H8NO6P       | -2     | C01102  |
| cpd00143    | phpyr       | Phenylpyruvate                                                 | C9H7O3         | -1     | C00166  |
| cpd03607    | phthr       | O-Phospho-4-hydroxy-L-threonine                                | C4H8NO7P       | -2     | C00055  |
| cpd00009    | pi          | hydrogenphosphate                                              | HO4P           | -2     | C00009  |
|             | pmACP       | Pimeloyl-ACP                                                   | C18H30N2O10PRS | -2     |         |
|             | pmACPm      | Pimeloyl-ACP methyl ester                                      | C19H33N2O10PRS | -1     |         |
| cpd00782    | pmcoa       | Pimeloyl-CoA                                                   | C28H41N7O19P3S | -5     | C01063  |
| cpd00134    | pmtcoa      | Palmitoyl-CoA (n-C16:0CoA)                                     | C37H62N7O17P3S | -4     | C00154  |
| cpd00644    | pnto-R      | (R)-Pantothenate                                               | C9H16NO5       | -1     | C00864  |
| cpd00141    | ppa         | Propionate (n-C3:0)                                            | C3H5O2         | -1     | C00163  |
| cpd01844    | ppap        | Propanoyl phosphate                                            | C3H5O5P        | -2     | C02876  |
| cpd00086    | ppcoa       | Propanoyl-CoA                                                  | C24H36N7O17P3S | -4     | C00100  |
| cpd00905    | ppgpp       | Guanosine 3,5-bis(diphosphate)                                 | C10H11N5O17P4  | -6     | C01228  |
| cpd00219    | pphn        | Prephenate                                                     | C10H8O6        | -2     | C00254  |
| cpd00012    | ppi         | Diphosphate                                                    | HO7P2          | -3     | C00013  |

| SEED Met ID | BIGG Met ID | Name                                                                                                 | Formula       | Charge | KEGG ID |
|-------------|-------------|------------------------------------------------------------------------------------------------------|---------------|--------|---------|
| cpd00421    | pppi        | Inorganic triphosphate                                                                               | HO10P3        | -4     | C03279  |
| cpd01982    | pram        | 5-Phospho-beta-D-ribosylamine                                                                        | C5H11NO7P     | -1     | C03090  |
| cpd02642    | pran        | N-(5-Phospho-D-ribosyl)anthranilate                                                                  | C12H13NO9P    | -3     | C04302  |
| cpd01777    | prbamp      | 1-(5-Phosphoribosyl)-AMP                                                                             | C15H19N5O14P2 | -4     | C02741  |
| cpd01775    | prbatp      | 1-(5-Phosphoribosyl)-ATP                                                                             | C15H19N5O20P4 | -6     | C02739  |
| cpd02979    | prfp        | 1-(5-Phosphoribosyl)-5-[(5-phosphoribosylamino)methylideneamino]imidazole-4-carboxamide              | C15H21N5O15P2 | -4     | C04896  |
| cpd02991    | prlp        | 5-[(5-phospho-1-deoxyribulos-1-ylamino)methylideneamino]-1-(5-phosphoribosyl)imidazole-4-carboxamide | C15H21N5O15P2 | -4     | C04916  |
|             | progly      | L-Prolinylglycine                                                                                    | C7H12N2O3     | 0      |         |
| cpd00129    | pro-L       | L-Proline                                                                                            | C5H9NO2       | 0      | C00148  |
| cpd00103    | prpp        | 5-Phospho-alpha-D-ribose 1-diphosphate                                                               | C5H8O14P3     | -5     | C00119  |
| cpd15552    | ps120       | phosphatidylserine (didodecanoyl, n-C12:0)                                                           | C30H57N1O10P1 | -1     | C02737  |
| cpd15553    | ps140       | phosphatidylserine (ditetradecanoyl, n-C14:0)                                                        | C34H65N1O10P1 | -1     | C02737  |
| cpd15555    | ps160       | phosphatidylserine (dihexadecanoyl, n-C16:0)                                                         | C38H73N1O10P1 | -1     | C02737  |
| cpd15557    | ps180       | phosphatidylserine (dioctadecanoyl, n-C18:0)                                                         | C42H81N1O10P1 | -1     | C02737  |
| cpd15558    | ps181       | phosphatidylserine (dioctadec-11-enoyl, n-C18:1)                                                     | C42H77N1O10P1 | -1     | C02737  |
| cpd15693    | psai15      | Phosphatidylserine (12-methyl-tetradecanoyl, anteiso-C15)                                            | C36H69NO10P   | -1     |         |
| cpd15690    | psai17      | Phosphatidylserine (14-methyl-hexadecanoyl, anteiso-C17)                                             | C40H77NO10P   | -1     |         |
| cpd00859    | psd5p       | Pseudouridine 5-phosphate                                                                            | C9H11N2O9P    | -2     | C01168  |
| cpd00738    | pser-L      | O-Phospho-L-serine                                                                                   | C3H6NO6P      | -2     | C01005  |
| cpd15691    | psi14       | Phosphatidylserine (12-methyl-tridecanoyl, iso-C14)                                                  | C34H65NO10P   | -1     |         |
| cpd15692    | psi15       | Phosphatidylserine (13-methyl-tetradecanoyl, iso-C15)                                                | C36H69NO10P   | -1     |         |
| cpd15694    | psi16       | Phosphatidylserine (14-methyl-pentadecanoyl, iso-C16)                                                | C38H73NO10P   | -1     |         |
| cpd15689    | psi17       | Phosphatidylserine (15-methyl-hexadecanoyl, iso-C17)                                                 | C40H77NO10P   | -1     |         |

| SEED Met ID | BIGG Met ID   | Name                                                                                                                                                                                                                                                            | Formula          | Charge | KEGG ID |
|-------------|---------------|-----------------------------------------------------------------------------------------------------------------------------------------------------------------------------------------------------------------------------------------------------------------|------------------|--------|---------|
| cpd00118    | ptrc          | Putrescine                                                                                                                                                                                                                                                      | C4H14N2          | 2      | C00134  |
|             | pullulan1200  | pullulan (n=1200 repeat units, alpha-1,4 and alph-1,6 bounds)                                                                                                                                                                                                   | C7200H12002O6001 | 0      |         |
| cpd00493    | pyam5p        | Pyridoxamine 5-phosphate                                                                                                                                                                                                                                        | C8H12N2O5P       | -1     | C00647  |
| cpd00419    | pydam         | Pyridoxamine                                                                                                                                                                                                                                                    | C8H13N2O2        | 1      | C00534  |
| cpd00215    | pydx          | Pyridoxal                                                                                                                                                                                                                                                       | C8H9NO3          | 0      | C00250  |
| cpd00016    | pydx5p        | Pyridoxal 5-phosphate                                                                                                                                                                                                                                           | C8H8NO6P         | -2     | C00018  |
| cpd00263    | pydxn         | Pyridoxine                                                                                                                                                                                                                                                      | C8H11NO3         | 0      | C00314  |
| cpd00020    | pyr           | pyruvate                                                                                                                                                                                                                                                        | C3H3O3           | -1     | C00022  |
| cpd15560    | q8            | Ubiquinone-8                                                                                                                                                                                                                                                    | C49H74O4         | 0      | C00399  |
| cpd15561    | q8h2          | Ubiquinol-8                                                                                                                                                                                                                                                     | C49H76O4         | 0      | C00390  |
| cpd02333    | quln          | Quinolate                                                                                                                                                                                                                                                       | C7H3NO4          | -2     | C03722  |
| cpd00475    | r1p           | alpha-D-Ribose 1-phosphate                                                                                                                                                                                                                                      | C5H9O8P          | -2     | C00620  |
| cpd00101    | r5p           | alpha-D-Ribose 5-phosphate                                                                                                                                                                                                                                      | C5H9O8P          | -2     | C00117  |
| cpd00382    | raffin        | Raffinose                                                                                                                                                                                                                                                       | C18H32O16        | 0      | C00492  |
| cpd00258    | rbl-D         | D-Ribulose                                                                                                                                                                                                                                                      | C5H10O5          | 0      | C00309  |
| cpd00397    | rbl-L         | L-Ribulose                                                                                                                                                                                                                                                      | C5H10O5          | 0      | C00508  |
|             | rhamnogalurI  | Potato rhamnogalacturonan I, MW assumed ~200000, 62 galur, 20 rmn, 12 gal, 3 arab-L, 1 xyl-D (www.megazyme.com, PMID: 16661590)                                                                                                                                 | C5840H7862O5281  | -620   | G09800  |
|             | rhamnogalurII | Wine rhamnogalacturonan II, MW ~ 5-10 kDa, 37% galur, 16% rmn, 3% fuc-L, 11% arab-L, 6% gal, 5% glcur, 4% 2omfuc, 3% 2omxyl, 6% apio-D, 2% acerA, 4% kdo, 3% 3ddlhept, 53 sugars in total (http://www.ccrc.uga.edu/~mao/rg2/intro.htm, doi:10.1155/2011/964521) | C317H445O273     | -27    | G06506  |
| cpd02227    | rhcys         | S-Ribosyl-L-homocysteine                                                                                                                                                                                                                                        | C9H17NO6S        | 0      | C03539  |
| cpd00105    | rib-D         | D-Ribose                                                                                                                                                                                                                                                        | C5H10O5          | 0      | C00121  |
| cpd00220    | ribflv        | Riboflavin                                                                                                                                                                                                                                                      | C17H20N4O6       | 0      | C00255  |
| cpd00642    | rml           | L-Rhamnulose                                                                                                                                                                                                                                                    | C6H12O5          | 0      | C00861  |

| SEED Met ID | BIGG Met ID   | Name                                                              | Formula        | Charge | KEGG ID |
|-------------|---------------|-------------------------------------------------------------------|----------------|--------|---------|
| cpd00831    | rml1p         | L-Rhamnulose 1-phosphate                                          | C6H11O8P       | -2     | C01131  |
| cpd00396    | rmn           | L-Rhamnose                                                        | C6H12O5        | 0      | C00507  |
| cpd02016    | rnsm          | N-Ribosylnicotinamide                                             | C11H15N2O5     | 1      | C03150  |
| cpd00171    | ru5p-D        | D-Ribulose 5-phosphate                                            | C5H9O8P        | -2     | C00199  |
| cpd00808    | ru5p-L        | L-Ribulose 5-phosphate                                            | C5H9O8P        | -2     | C01101  |
| cpd00074    | s             | Sulfur                                                            | S              | 0      |         |
| cpd00349    | s17bp         | Sedoheptulose 1,7-bisphosphate                                    | C7H12O13P2     | -4     | C00447  |
|             | s2l2fn2m2masn | PA6                                                               | C90H145N6O65X  | -2     |         |
|             | s2l2n2m2m     | de-Fuc form of PA6 (w/o peptide linkage)                          | C84H136N6O62   | -2     |         |
|             | s2l2n2m2masn  | de-Fuc form of PA6                                                | C84H135N6O61X  | -2     |         |
|             | s2l2n2m2mn    | de-Fuc, reducing GlcNAc removed form of PA6 (w/o peptide linkage) | C76H123N5O57   | -2     |         |
| cpd00238    | s7p           | Sedoheptulose 7-phosphate                                         | C7H13O10P      | -2     | C00281  |
| cpd02021    | sbzcoa        | O-Succinylbenzoyl-CoA                                             | C32H39N7O20P3S | -5     | C03160  |
|             | Ser_Thr       | protein-linked serine or threonine residue (O-glycosylation site) | XH             | 0      |         |
| cpd00054    | ser-L         | L-Serine                                                          | C3H7NO3        | 0      | C00065  |
| cpd00383    | skm           | Shikimate                                                         | C7H9O5         | -1     | C00493  |
| cpd02030    | skm5p         | Shikimate 5-phosphate                                             | C7H8O8P        | -3     | C03175  |
| cpd00081    | so3           | Sulfite                                                           | O3S            | -2     | C00094  |
| cpd00048    | so4           | Sulfate                                                           | O4S            | -2     | C00059  |
|             | sphgn         | sphinganine(1+)                                                   | C18H40NO2      | 1      | C00836  |
|             | sphmyln_bt    | Sphingomyelin (B. thetaiotaomicron specific)                      | C40H83N2O6P    | 0      |         |
| cpd00264    | spmd          | Spermidine                                                        | C7H22N3        | 3      | C00315  |
|             | sT_antigen    | sialyl-T antigen                                                  | C25H40N2O18X   | -1     |         |

| SEED Met ID | BIGG Met ID  | Name                                                                                                               | Formula          | Charge | KEGG ID |
|-------------|--------------|--------------------------------------------------------------------------------------------------------------------|------------------|--------|---------|
|             | starch1200   | starch n=1200 repeat units (300 repeat units amylose, 900 repeat units amylopectin, corresponds to potatoe starch) | C7200H12002O6001 | 0      |         |
| cpd00327    | stcoa        | Stearoyl-CoA (n-C18:0CoA)                                                                                          | C39H66N7O17P3S   | -4     | C00412  |
|             | sTn_antigen  | sialyl-Tn antigen                                                                                                  | C19H30N2O13X     | -1     |         |
|             | strch1       | starch, structure 1 (1,6-{ 7[1,4-Glc], 4[1,4-Glc]})                                                                | C66H112O56       | 0      |         |
|             | strch2       | starch, structure 2 (1,6-{ 2[1,4-Glc], [1,4-Glc]})                                                                 | C18H32O16        | 0      |         |
| cpd01133    | stys         | Stachyose                                                                                                          | C24H42O21        | 0      | C01613  |
| cpd01772    | sucbz        | o-Succinylbenzoate                                                                                                 | C11H8O5          | -2     | C02730  |
| cpd00036    | succ         | Succinate                                                                                                          | C4H4O4           | -2     | C00042  |
|             | succitr-L    | N-succinyl-L-citrulline                                                                                            | C10H16N3O6       | -1     |         |
| cpd00078    | succoa       | Succinyl-CoA                                                                                                       | C25H35N7O19P3S   | -5     | C00091  |
| cpd00822    | suchms       | O-Succinyl-L-homoserine                                                                                            | C8H12NO6         | -1     | C01118  |
|             | sucorn       | N2-Succinyl-L-ornithine                                                                                            | C9H15N2O5        | -1     | C03415  |
| cpd00076    | sucr         | Sucrose                                                                                                            | C12H22O11        | 0      | C00089  |
|             | T_antigen    | T antigen (core 1)                                                                                                 | C14H24NO10X      | 0      |         |
|             | t3c11vaceACP | trans-3-cis-11-vacceoyl-[acyl-carrier protein]                                                                     | C29H51N2O8PRS    | -1     |         |
|             | t3c5ddeceACP | trans-3-cis-5-dodecenoyl-[acyl-carrier protein]                                                                    | C23H39N2O8PRS    | -1     |         |
|             | t3c7mrseACP  | trans-3-cis-7-myristoleoyl-[acyl-carrier protein]                                                                  | C25H43N2O8PRS    | -1     |         |
|             | t3c9palmeACP | trans-3-cis-9-palmitoleoyl-[acyl-carrier protein]                                                                  | C27H47N2O8PRS    | -1     |         |
| cpd00805    | tag6p-D      | D-Tagatose 6-phosphate                                                                                             | C6H11O9P         | -2     | C01097  |
| cpd02371    | tagdp-D      | D-Tagatose 1,6-biphosphate                                                                                         | C6H10O12P2       | -4     | C03785  |
| cpd00437    | tagur        | D-Tagaturonate                                                                                                     | C6H9O7           | -1     | C00558  |
|             | taur         | Taurine                                                                                                            | C2H7NO3S         | 0      | C00245  |
|             | tchola       | taurocholic acid                                                                                                   | C26H45NO7S       | 0      | C05122  |

| SEED Met ID | BIGG Met ID | Name                                                  | Formula        | Charge | KEGG ID |
|-------------|-------------|-------------------------------------------------------|----------------|--------|---------|
| cpd01695    | tdcoa       | Tetradecanoyl-CoA (n-C14:0CoA)                        | C35H58N7O17P3S | -4     | C02593  |
| cpd11469    | tddec2eACP  | trans-Dodec-2-enoyl-[acyl-carrier protein]            | C23H41N2O8PRS  | -1     | C05758  |
| cpd15294    | tdeACP      | cis-tetradec-7-enoyl-[acyl-carrier protein] (n-C14:1) | C25H45N2O8PRS  | -1     |         |
| cpd11475    | tdec2eACP   | trans-Dec-2-enoyl-[acyl-carrier protein]              | C21H37N2O8PRS  | -1     | C05754  |
| cpd02465    | thdp        | 2,3,4,5-Tetrahydrodipicolinate                        | C7H7NO4        | -2     | C03972  |
| cpd11473    | thex2eACP   | trans-Hex-2-enoyl-[acyl-carrier protein]              | C17H29N2O8PRS  | -1     | C05748  |
| cpd00087    | thf         | 5,6,7,8-Tetrahydrofolate                              | C19H21N7O6     | -2     | C00101  |
| cpd06227    | thfglu      | Tetrahydrofolyl-[Glu](2)                              | C24H27N8O9     | -3     | C09332  |
| cpd00305    | thm         | Thiamin                                               | C12H17N4OS     | 1      | C00378  |
| cpd00793    | thmmp       | Thiamin monophosphate                                 | C12H16N4O4PS   | -1     | C01081  |
| cpd00056    | thmpp       | Thiamine diphosphate                                  | C12H16N4O7P2S  | -2     | C00068  |
| cpd00161    | thr-L       | L-Threonine                                           | C4H9NO3        | 0      | C00188  |
| cpd00184    | thymd       | Thymidine                                             | C10H14N2O5     | 0      | C00214  |
| cpd11467    | tmrs2eACP   | trans-Tetradec-2-enoyl-[acyl-carrier protein]         | C25H45N2O8PRS  | -1     | C05760  |
|             | Tn_antigen  | Tn antigen                                            | C8H14NO5X      | 0      | C04383  |
| cpd11471    | toct2eACP   | trans-Oct-2-enoyl-[acyl-carrier protein]              | C19H33N2O8PRS  | -1     | C05751  |
| cpd11572    | toctd2eACP  | trans-octadec-2-enoyl-[acyl-carrier protein]          | C29H53N2O8PRS  | -1     |         |
| cpd11477    | tpalm2eACP  | trans-Hexadec-2-enoyl-[acyl-carrier protein]          | C27H49N2O8PRS  | -1     | C05763  |
| cpd11420    | trdox       | Oxidized thioredoxin                                  | X              | 0      | C00343  |
| cpd11421    | trdrd       | Reduced thioredoxin                                   | XH2            | 0      | C00342  |
|             | tre         | Trehalose                                             | C12H22O11      | 0      | C01083  |
| cpd00065    | trp-L       | L-Tryptophan                                          | C11H12N2O2     | 0      | C00078  |
| cpd00268    | tsul        | Thiosulfate                                           | O3S2           | -2     | C00320  |

| SEED Met ID | BIGG Met ID | Name                                                                                                               | Formula        | Charge | KEGG ID |
|-------------|-------------|--------------------------------------------------------------------------------------------------------------------|----------------|--------|---------|
| cpd03847    | ttdca       | tetradecanoate (n-C14:0)                                                                                           | C14H27O2       | -1     | C06424  |
| cpd00069    | tyr-L       | L-Tyrosine                                                                                                         | C9H11NO3       | 0      | C00082  |
|             | u23ga_bt    | UDP-2(3-hydroxypalmitoyl)-3(anteiso-C17)glucosamine                                                                | C48H85N3O20P2  | -2     |         |
|             | u2ga_bt     | u2ga_bt                                                                                                            | C48H86N3O20P2  | -1     |         |
|             | u2hga_bt    | UDP-2-hydroxyoctadecanoyl-D-glucosamine                                                                            | C31H54N3O18P2  | -1     |         |
|             | u3aga_HP    | UDP-3-O-(3-hydroxypalmetoyl)-N-acetylglucosamine                                                                   | C33H55N3O19P2  | -2     |         |
|             | u3hga_HP    | UDP-3-O(3-hydroxypalmetoyl)-D-glucosamine                                                                          | C31H54N3O18P2  | -1     |         |
| cpd03491    | uaaGgla     | Undecaprenyl-diphospho-N-acetylmuramoyl-(N-acetylglucosamine)-L-alanyl-gamma-D-glutamyl-L-lysyl-D-alanyl-D-alanine | C94H153N8O26P2 | -3     | C05893  |
| cpd03495    | uaagmda     | Undecaprenyl-diphospho-N-acetylmuramoyl-(N-acetylglucosamine)-L-ala-D-glu-meso-2,6-diaminopimeloyl-D-ala-D-ala     | C95H152N8O28P2 | -4     | C05898  |
| cpd02820    | uaccg       | UDP-N-acetyl-3-O-(1-carboxyvinyl)-D-glucosamine                                                                    | C20H26N3O19P2  | -3     | C04631  |
| cpd00037    | uacgam      | UDP-N-acetyl-D-glucosamine                                                                                         | C17H25N3O17P2  | -2     | C00043  |
| cpd00861    | uacmam      | UDP-N-acetyl-D-mannosamine                                                                                         | C17H25N3O17P2  | -2     | C01170  |
|             | uacmamu     | UDP-N-acetyl-D-mannosaminouronate                                                                                  | C17H22N3O18P2  | -3     | C06240  |
| cpd02948    | uaGgla      | Undecaprenyl-diphospho-N-acetylmuramoyl-L-alanyl-gamma-D-glutamyl-L-lysyl-D-alanyl-D-alanine                       | C86H140N7O21P2 | -3     | C04851  |
| cpd03494    | uagmda      | Undecaprenyl-diphospho-N-acetylmuramoyl-L-alanyl-D-glutamyl-meso-2,6-diaminopimeloyl-D-alanyl-D-alanine            | C87H139N7O23P2 | -4     | C05897  |
| cpd00890    | uama        | UDP-N-acetylmuramoyl-L-alanine                                                                                     | C23H33N4O20P2  | -3     | C01212  |
| cpd00525    | uamag       | UDP-N-acetylmuramoyl-L-alanyl-D-glutamate                                                                          | C28H39N5O23P2  | -4     | C00692  |
| cpd00773    | uamr        | UDP-N-acetylmuramate                                                                                               | C20H28N3O19P2  | -3     | C01050  |
| cpd02229    | udcpdp      | Undecaprenyl diphosphate                                                                                           | C55H89O7P2     | -3     | C03543  |
| cpd00286    | udcpp       | Undecaprenyl phosphate                                                                                             | C55H89O4P      | -2     | C00348  |
| cpd00014    | udp         | UDP                                                                                                                | C9H11N2O12P2   | -3     | C00015  |
| cpd00175    | udpacgal    | UDP-N-acetyl-D-galactosamine                                                                                       | C17H25N3O17P2  | -2     | C00203  |
| cpd00026    | udpg        | UDPgucose                                                                                                          | C15H22N2O17P2  | -2     | C00029  |

| SEED Met ID | BIGG Met ID | Name                                                                                 | Formula       | Charge | KEGG ID |
|-------------|-------------|--------------------------------------------------------------------------------------|---------------|--------|---------|
| cpd00043    | udpgal      | UDPgaltose                                                                           | C15H22N2O17P2 | -2     | C00052  |
| cpd00144    | udpglcur    | UDP-D-glucuronate                                                                    | C15H19N2O18P2 | -3     | C00167  |
|             | udpidour    | UDP-L-iduronate                                                                      | C15H19N2O18P2 | -3     | C02330  |
|             | udpxyl      | UDP-alpha-D-xylose(2-)                                                               | C14H20N2O16P2 | -2     | C00190  |
|             | ugam        | UDP-glucosamine                                                                      | C15H24N3O16P2 | -1     | C02200  |
| cpd02862    | uGgla       | UDP-N-acetylmuramoyl-L-alanyl-gamma-D-glutamyl-L-lysyl-D-alanyl-D-alanine            | C40H62N9O26P2 | -3     | C04702  |
| cpd02964    | ugmd        | UDP-N-acetylmuramoyl-L-alanyl-D-gamma-glutamyl-meso-2,6-diaminopimelate              | C35H51N7O26P2 | -4     | C04877  |
| cpd02968    | ugmda       | UDP-N-acetylmuramoyl-L-alanyl-D-glutamyl-meso-2,6-diaminopimeloyl-D-alanyl-D-alanine | C41H61N9O28P2 | -4     | C04882  |
| cpd00091    | ump         | UMP                                                                                  | C9H11N2O9P    | -2     | C00105  |
| cpd00946    | unaga       | Undecaprenyl diphospho N-acetyl-glucosamine                                          | C63H103NO12P2 | -2     |         |
|             | unsdigalur  | 4-(4-Deoxy-alpha-D-gluc-4-enuronosyl)-D-galacturonate, Unsaturated digalacturonate   | C12H14O12     | -2     | C06118  |
| cpd00092    | ura         | Uracil                                                                               | C4H4N2O2      | 0      | C00106  |
| cpd00581    | urcan       | Urocanate                                                                            | C6H5N2O2      | -1     | C00785  |
| cpd00073    | urea        | Urea                                                                                 | CH4N2O        | 0      | C00086  |
| cpd00249    | uri         | Uridine                                                                              | C9H12N2O6     | 0      | C00299  |
| cpd00062    | utp         | UTP                                                                                  | C9H11N2O15P3  | -4     | C00075  |
| cpd00156    | val-L       | L-Valine                                                                             | C5H11NO2      | 0      | C00183  |
| cpd00309    | xan         | Xanthine                                                                             | C5H4N4O2      | 0      | C00385  |
| cpd00497    | xmp         | Xanthosine 5-phosphate                                                               | C10H11N4O9P   | -2     | C00655  |
| cpd00530    | xtp         | XTP                                                                                  | C10H11N4O15P3 | -4     | C00700  |
| cpd01217    | xtsn        | Xanthosine                                                                           | C10H12N4O6    | 0      | C01762  |
| cpd03861    | xu1p-L      | L-Xylulose 1-phosphate                                                               | C5H9O8P       | -2     |         |
| cpd00198    | xu5p-D      | D-Xylulose 5-phosphate                                                               | C5H9O8P       | -2     | C00231  |

| SEED Met ID | BIGG Met ID | Name       | Formula | Charge | KEGG ID |
|-------------|-------------|------------|---------|--------|---------|
| cpd00154    | xyl-D       | D-Xylose   | C5H10O5 | 0      | C00181  |
| cpd00259    | xylu-D      | D-Xylulose | C5H10O5 | 0      | C00310  |
| cpd00261    | xylu-L      | L-Xylulose | C5H10O5 | 0      | C00312  |
| cpd00034    | zn2         | Zinc       | Zn      | 2      | C00038  |

Table S10c: Reactions included in the automated Model SEED reconstruction *B $\theta$ \_Seed\_v1* that were rejected based on manual inspection and replaced with similar reactions.

| SEED Rxn ID | BIGG Rxn ID    | Function                                                  | EC Number  | Subsystem                                                                                 | GPR                                                                                                                                                                                               | Replaced with | Reason for Replacement                                                                                                                                        | Reference                                              |
|-------------|----------------|-----------------------------------------------------------|------------|-------------------------------------------------------------------------------------------|---------------------------------------------------------------------------------------------------------------------------------------------------------------------------------------------------|---------------|---------------------------------------------------------------------------------------------------------------------------------------------------------------|--------------------------------------------------------|
| bio01632    | Not in BIGG DB | Biomass reaction<br>Bacteroides<br>thetaitaomicron        | Unassigned |                                                                                           |                                                                                                                                                                                                   | Biomass_BT_v2 |                                                                                                                                                               | The biomass reaction was modified based on literature. |
| rxn00001    | PPA            | Inorganic<br>pyrophosphatase PpaX                         | None       | BT_4315                                                                                   |                                                                                                                                                                                                   | PPA_1         | Manual inspection of gene annotation revealed that this enzyme carries out a different reaction (generation of a proton motive force when PMF is sufficient). | NCBI Gene (last updated 28.05.11)                      |
| rxn00011    | ACLS_a         | pyruvatethiamin<br>diphosphate<br>acetaldehydetransferase | 2.2.1.6    | Branched-Chain<br>Amino Acid<br>Biosynthesis;<br><br>Acetoin,<br>butanediol<br>metabolism | ( BT_2076 and<br>BT_2077 )                                                                                                                                                                        | ACLS          | Two BIGG reactions sum up three SEED reactions (performed by same enzyme)                                                                                     | BIGG Database                                          |
| rxn00016    | AHEXASE3       | Hexosaminidase                                            | 3.2.1.52   | Chitin and N-<br>acetylglucosamine<br>utilization                                         | (BT_4394 or<br>BT_4395 or BT_4337<br>or BT_3598 or<br>BT_1627 or BT_3868<br>or BT_0459 or<br>BT_0460 or BT_0506<br>or BT_4681 or<br>BT_1621 or BT_3178<br>or BT_0456 or<br>BT_1051 or<br>BT_2459) | AHEXASE3e     | The saccharolytic enzymes of <i>B. thetaiotaomicron</i> are located mostly in periplasm (extracellular for modelling purposes).                               | PMID:12663928                                          |
| rxn00199    | Not in BIGG DB | Isocitrate<br>dehydrogenase<br>[NADP] (EC<br>1.1.1.42)    | 1.1.1.42   | TCA Cycle                                                                                 | BT_2071                                                                                                                                                                                           | ICDHyr        | One BIGG reaction sums up two SEED reactions (performed by same enzyme)                                                                                       | BIGG Database                                          |
| rxn00302    | Not in BIGG DB | GTP cyclohydrolase I<br>type 1                            | 3.5.4.16   | Folate Biosynthesis;<br><br>Queuosine-<br>Archaeosine<br>Biosynthesis                     | BT_3931                                                                                                                                                                                           | GTPCI         | One BIGG reaction sums up four SEED reactions (performed by same enzyme)                                                                                      | BIGG Database                                          |

| SEED Rxn ID | BIGG Rxn ID    | Function                                      | EC Number | Subsystem                                                                                                                    | GPR                     | Replaced with | Reason for Replacement                                                                                                          | Reference     |
|-------------|----------------|-----------------------------------------------|-----------|------------------------------------------------------------------------------------------------------------------------------|-------------------------|---------------|---------------------------------------------------------------------------------------------------------------------------------|---------------|
| rxn00816    | LACZ           | Lactose galactohydrolase                      | 3.2.1.108 | Lactose and Galactose Uptake and Utilization;<br><br>Lactose utilization;<br><br>Galactosylceramide and Sulfatide metabolism | BT_1626 or BT_4050      | LACZe         | The saccharolytic enzymes of <i>B. thetaiotaomicron</i> are located mostly in periplasm (extracellular for modelling purposes). | PMID:12663928 |
| rxn00863    | Not in BIGG DB | Histidinol dehydrogenase                      | 1.1.1.23  | Histidine Biosynthesis                                                                                                       | BT_0201                 | HISTD         | One BIGG reaction sums up two SEED reactions (performed by same enzyme)                                                         | BIGG Database |
| rxn01316    | ACNAMS         | N-acetylneuraminate synthase                  | 2.5.1.56  | CMP-N-acetylneuraminate Biosynthesis                                                                                         | BT_1714                 | ACNAM9PL2     | BT_1714 gene product was experimentally characterized and shown to carry out a different reaction (KDN-9-P-synthase).           | PMID:18804026 |
| rxn01387    | Not in BIGG DB | Isocitrate dehydrogenase [NADP] (EC 1.1.1.42) | 1.1.1.42  | TCA Cycle                                                                                                                    | BT_2071                 | ICDHyr        | One BIGG reaction sums up two SEED reactions (performed by same enzyme)                                                         | BIGG Database |
| rxn02159    | Not in BIGG DB | Histidinol dehydrogenase                      | 1.1.1.23  | Histidine Biosynthesis                                                                                                       | BT_0201                 | HISTD         | One BIGG reaction sums up two SEED reactions (performed by same enzyme)                                                         | BIGG Database |
| rxn02185    | ACLS_b         | 2-Acetolactate pyruvate-lyase (carboxylating) | 2.2.1.6   | Branched-Chain Amino Acid Biosynthesis;<br><br>Acetoin, butanediol metabolism                                                | ( BT_2076 and BT_2077 ) | ACLS          | Two BIGG reactions sum up three SEED reactions (performed by same enzyme)                                                       | BIGG Database |
| rxn02186    | Not in BIGG DB | Ketol-acid reductoisomerase (EC 1.1.1.86)     | 1.1.1.86  | Coenzyme A Biosynthesis;<br><br>Branched-Chain Amino Acid Biosynthesis                                                       | BT_2074                 | KARA1         | One BIGG reaction sums up three SEED reactions (performed by same enzyme)                                                       | BIGG Database |
| rxn02187    | Not in BIGG DB | Ketol-acid reductoisomerase (EC 1.1.1.86)     | 1.1.1.86  | Coenzyme A Biosynthesis;<br><br>Branched-Chain Amino Acid Biosynthesis                                                       | BT_2074                 | KARA1         | One BIGG reaction sums up three SEED reactions (performed by same enzyme)                                                       | BIGG Database |

| SEED Rxn ID | BIGG Rxn ID    | Function                                                      | EC Number | Subsystem                                                                     | GPR                     | Replaced with | Reason for Replacement                                                    | Reference                                          |
|-------------|----------------|---------------------------------------------------------------|-----------|-------------------------------------------------------------------------------|-------------------------|---------------|---------------------------------------------------------------------------|----------------------------------------------------|
| rxn03068    | Not in BIGG DB | Ketol-acid reductoisomerase (EC 1.1.1.86)                     | 1.1.1.86  | Coenzyme A Biosynthesis;<br><br>Branched-Chain Amino Acid Biosynthesis        | BT_2074                 | KARA1         | One BIGG reaction sums up three SEED reactions (performed by same enzyme) | BIGG Database                                      |
| rxn03130    | USHD           | UDP-2,3-diacetylglucosamine hydrolase                         | 3.6.1.-   | KDO2-Lipid A biosynthesis                                                     | BT_3697                 | USHD_BT       | Replaced with <i>B. thetaiotaomicron</i> -specific reaction               | PMID:19460428.;<br>PMID:20974832;<br>PMID:18931137 |
| rxn03159    | LPADSS         | Lipid-A-disaccharide synthase                                 | 2.4.1.182 | KDO2-Lipid A biosynthesis                                                     | BT_4004                 | LPADSS_BT     | Replaced with <i>B. thetaiotaomicron</i> -specific reaction               | PMID:19460428.;<br>PMID:20974832;<br>PMID:18931137 |
| rxn03174    | Not in BIGG DB | 2-Amino-4-hydroxy-6-(erythro-1,2,3-trihydroxypropyl)          | 3.5.4.16  | Folate Biosynthesis;<br><br>Queuosine-Archaeosine Biosynthesis                | BT_3931                 | GTPCI         | One BIGG reaction sums up four SEED reactions (performed by same enzyme)  | BIGG Database                                      |
| rxn03181    | TDSK           | Tetraacyldisaccharide 4'-kinase                               | 2.7.1.130 | KDO2-Lipid A biosynthesis                                                     | BT_1880                 | TTDSK_BT      | Replaced with <i>B. thetaiotaomicron</i> -specific reaction               | PMID:19460428.;<br>PMID:20974832;<br>PMID:18931137 |
| rxn03182    | MOAT           | 3-deoxy-D-manno-octulosonic-acid transferase                  | 2.-.-.-   | KDO2-Lipid A biosynthesis                                                     | BT_2747                 | MOAT_BT       | Replaced with <i>B. thetaiotaomicron</i> -specific reaction               | PMID:19460428.;<br>PMID:20974832;<br>PMID:18931137 |
| rxn03194    | ilvg           | (S)-2-Aceto-2-hydroxybutanoate pyruvate-lyase (carboxylating) | 2.2.1.6   | Branched-Chain Amino Acid Biosynthesis;<br><br>Acetoin, butanediol metabolism | ( BT_2076 and BT_2077 ) | ACHBS         | Two BIGG reactions sum up three SEED reactions (performed by same enzyme) | BIGG Database                                      |
| rxn03419    | Not in BIGG DB | GTP cyclohydrolase I type 1                                   | 3.5.4.16  | Folate Biosynthesis;<br><br>Queuosine-Archaeosine Biosynthesis                | BT_3931                 | GTPCI         | One BIGG reaction sums up four SEED reactions (performed by same enzyme)  | BIGG Database                                      |
| rxn03421    | Not in BIGG DB | GTP cyclohydrolase I type 1                                   | 3.5.4.16  | Folate Biosynthesis;<br><br>Queuosine-Archaeosine Biosynthesis                | BT_3931                 | GTPCI         | One BIGG reaction sums up four SEED reactions (performed by same enzyme)  | BIGG Database                                      |
| rxn03435    | Not in BIGG DB | Ketol-acid reductoisomerase (EC 1.1.1.86)                     | 1.1.1.86  | Coenzyme A Biosynthesis;<br><br>Branched-Chain Amino Acid Biosynthesis        | BT_2074                 | KARA2         | One BIGG reaction sums up two SEED reactions (performed by same enzyme)   | BIGG Database                                      |
| rxn03436    | Not in BIGG DB | Ketol-acid reductoisomerase (EC 1.1.1.86)                     | 1.1.1.86  | Coenzyme A Biosynthesis;<br><br>Branched-Chain Amino Acid Biosynthesis        | BT_2074                 | KARA2         | One BIGG reaction sums up two SEED reactions (performed by same enzyme)   | BIGG Database                                      |

| SEED Rxn ID | BIGG Rxn ID    | Function                                                       | EC Number    | Subsystem                                               | GPR                  | Replaced with | Reason for Replacement                                                                                           | Reference                                          |
|-------------|----------------|----------------------------------------------------------------|--------------|---------------------------------------------------------|----------------------|---------------|------------------------------------------------------------------------------------------------------------------|----------------------------------------------------|
| rxn03439    | MOAT2          | 3-deoxy-D-manno-octulosonic-acid transferase                   | 2.-.-.-      | KDO2-Lipid A biosynthesis                               | BT_2747              | MOAT_BT       | Replaced with <i>B. thetaiotaomicron</i> -specific reaction                                                      | PMID:19460428.;<br>PMID:20974832;<br>PMID:18931137 |
| rxn03951    | Not in BIGG DB | 4-hydroxythreonine-4-phosphate dehydrogenase                   | 1.1.1.262    | ECSIG4-SIG7;<br><br>Pyridoxin (Vitamin B6) Biosynthesis | BT_4374              | PDX5PS        | One BIGG reaction sums up two SEED reactions and one spontaneous reaction. GPR changed to (BT_3918 and BT_4374). | BIGG Database                                      |
| rxn04070    | Not in BIGG DB | Pyridoxine 5'-phosphate synthase                               | 2.6.99.2     | Pyridoxin (Vitamin B6) Biosynthesis                     | BT_3918              | PDX5PS        | One BIGG reaction sums up two SEED reactions and one spontaneous reaction. GPR changed to (BT_3918 and BT_4374). | BIGG Database                                      |
| rxn05012    | Not in BIGG DB | N-acetylornithine carbamoyltransferase                         | 2.1.3.9      | Arginine Biosynthesis extended                          | BT_3717              | SUCORNTC      | It was shown experimentally that this enzyme carries out a different reaction in <i>Bacteroides</i> species.     | PMID:16704984                                      |
| rxn05024    | Not in BIGG DB | Naphthoate synthase                                            | 4.1.3.36     | Menaquinone and Phylloquinone Biosynthesis              | BT_4702              | NPHS          | SEED reaction is incomplete. Complete reaction was drawn from BIGG database.                                     | BIGG Database                                      |
| rxn05116    | Not in BIGG DB | rxn05116                                                       | Undetermined | None                                                    | Spontaneous          | PDX5PS        | One BIGG reaction sums up two SEED reactions and one spontaneous reaction. GPR changed to (BT_3918 and BT_4374). | BIGG Database                                      |
| rxn06723    | U23GAAT        | UDP-3-O-[3-hydroxymyristoyl] glucosamine N-acyltransferase     | 2.3.1.-      | KDO2-Lipid A biosynthesis                               | BT_4207              | U23GAAT_BT    | Replaced with <i>B. thetaiotaomicron</i> -specific reaction                                                      | PMID:19460428.;<br>PMID:20974832;<br>PMID:18931137 |
| rxn06729    | UAGAAT         | (R)-3-Hydroxytetradecanoyl-[acyl-carrier-protein]UDP-N-acetyl- | 2.3.1.129    | KDO2-Lipid A biosynthesis                               | (BT_3336 or BT_4205) | UAGAAT_HP     | Drawn from <i>H. pylori</i> LPS biosynthesis pathway (BIGG), following protocol by Mazumdar et al. 2009          | PMID:18931137                                      |
| rxn06865    | EDTXS1         | Lipid A biosynthesis lauroyl acyltransferase                   | 2.3.1.-      | KDO2-Lipid A biosynthesis                               | BT_2152              | EDTXS1_BT     | Replaced with <i>B. thetaiotaomicron</i> -specific reaction                                                      | PMID:19460428.;<br>PMID:20974832;<br>PMID:18931137 |

| SEED Rxn ID | BIGG Rxn ID | Function                                      | EC Number | Subsystem                               | GPR                                                                                                                   | Replaced with | Reason for Replacement                                                                                                                                                 | Reference     |
|-------------|-------------|-----------------------------------------------|-----------|-----------------------------------------|-----------------------------------------------------------------------------------------------------------------------|---------------|------------------------------------------------------------------------------------------------------------------------------------------------------------------------|---------------|
| rxn08335    | DHORD5      | Dihydroorotate dehydrogenase (quinone)        | 1.3.3.1   | De Novo Pyrimidine Synthesis            | false annotation (BT_0891 and BT_0892)                                                                                | DHORDfum      | <i>B. thetaiotaomicron</i> has a fumarate-dependent, not a quinone-dependent dihydroorotate dehydrogenase.                                                             | KEGG database |
| rxn08336    | DHORD2      | Dihydroorotate dehydrogenase (quinone)        | 1.3.3.1   | De Novo Pyrimidine Synthesis            | false annotation (BT_0891 and BT_0892)                                                                                | DHORDfum      | <i>B. thetaiotaomicron</i> has a fumarate-dependent, not a quinone-dependent dihydroorotate dehydrogenase.                                                             | KEGG database |
| rxn09988    | ARABASE     | alpha-N-arabinofuranosidase                   | 3.2.1.55  | L-Arabinose utilization;<br><br>COG3533 | (BT_0348 or BT_3096 or BT_3657)                                                                                       | ARABASE3e     | The saccharolytic enzymes of <i>B. thetaiotaomicron</i> are located mostly in periplasm (extracellular for modelling purposes).                                        | PMID:12663928 |
| rxn10122    | NADH6       | NADH dehydrogenase (ubiquinone-8 3.5 protons) |           | Respiratory Complex I                   | (BT_4058 and BT_4059 and BT_4060 and BT_4061 and BT_4062 and BT_4063 and BT_4064 and BT_4065 and BT_4066 and BT_4067) | NADH17        | It is unclear if <i>B. thetaiotaomicron</i> utilizes ubiquinone. Therefore, a menaquinone-dependent reaction was drawn from the E. coli reconstruction iAF1260 (BIGG). | PMID:6102980  |

Table S10d: Reactions included in the automated Model SEED reconstruction B0\_Seed\_v1 that were rejected based on manual inspection.

| SEED Rxn ID | BIGG Rxn ID    | Function                                   | EC Number        | Subsystem                                                                                                                                                                                                                               | Gene Associated                                                                                    | Reason for Removal                                                                                                                                                                                                                                                                          | Reference                     |
|-------------|----------------|--------------------------------------------|------------------|-----------------------------------------------------------------------------------------------------------------------------------------------------------------------------------------------------------------------------------------|----------------------------------------------------------------------------------------------------|---------------------------------------------------------------------------------------------------------------------------------------------------------------------------------------------------------------------------------------------------------------------------------------------|-------------------------------|
| rxn00146    | Not in BIGG DB | D-lactate dehydrogenase (ferricytochrome)  | 1.1.1.28         | Fermentations: Lactate; Fermentations: Mixed acid                                                                                                                                                                                       | false annotation BT_1575                                                                           | Only NADH use reported for biochemically characterized lactate dehydrogenase. This reaction is catalyzed by a different enzyme (EC 1.1.2.4) which is not known to be present in <i>B. thetaiotaomicron</i> .                                                                                | PMID:19525515                 |
| rxn00222    | Not in BIGG DB | beta-D-Glucoside glucosylhydrolase         |                  | Beta-glucosidase (EC 3.2.1.21)                                                                                                                                                                                                          | ( BT_3300 ) or ( BT_1778 and BT_1780 ) or ( BT_3009 ) or ( BT_3314 ) or ( BT_2854 ) or ( BT_4714 ) | This reaction produces $\alpha$ -glucose. Only $\beta$ -glucose-producing reaction (BGLA) is included in the BIGG database and will be added.                                                                                                                                               |                               |
| rxn00350    | GTHRDH         | glutathione hydralase                      | 2.3.2.2,3.4.11.4 | Utilization_of_glutathione_as_a_sulphur_source Glutathione:_Biosynthesis_and_gamma-glutamyl_cycle Glutathione:_gamma-glutamyl_cycle Poly-glutamate_biosynthesis Ammonium_metabolism_H_pylori                                            | No                                                                                                 | <i>Bacteroides fragilis</i> does not have a pathway for glutathione synthesis. In <i>B. thetaiotaomicron</i> , genes required for glutathione synthesis are absent as well. All reactions involving glutathione were added during auto-completion, there is no evidence for their presence. | PMID:17873045                 |
| rxn00351    | GTHS           | glutathione synthetase                     | 6.3.2.3          | CBSS-320372.3.peg.6046 Glutathione:_Biosynthesis_and_gamma-glutamyl_cycle Heat_shock_dnaK_gene_cluster_extended Glutathione:_gamma-glutamyl_cycle Glutathione_synthesis Glutaredoxins Heme_temp_review Glutathione:_Non-redox_reactions | No                                                                                                 | <i>Bacteroides fragilis</i> does not have a pathway for glutathione synthesis. In <i>B. thetaiotaomicron</i> , genes required for glutathione synthesis are absent as well. All reactions involving glutathione were added during auto-completion, there is no evidence for their presence. | PMID:17873045                 |
| rxn00396    | Not in BIGG DB | ATPL-arginine N-phosphotransferase         | 2.7.3.3          | None                                                                                                                                                                                                                                    | No                                                                                                 | This reaction was added in to allow arginine production from arginine phosphate. Arginine is not essential, so the gaps in arginine biosynthesis were filled. Since arginine synthesis by <i>Bacteroides</i> is only partly known, a sink reaction was necessary.                           | PMID:4853401<br>PMID:16704984 |
| rxn00612    | G3PD2          | Glycerol-3-phosphate dehydrogenase [NADP+] | 1.1.1.94         | Glycerolipid and Glycerophospholipid Metabolism in Bacteria                                                                                                                                                                             | BT_2123                                                                                            | According to UniProt, this enzyme only uses NAD as ligand.                                                                                                                                                                                                                                  | UniProt                       |

|          |                |                                                               |              |                                                                                      |                                           |                                                                                                                                                                                                                                                                                             |               |
|----------|----------------|---------------------------------------------------------------|--------------|--------------------------------------------------------------------------------------|-------------------------------------------|---------------------------------------------------------------------------------------------------------------------------------------------------------------------------------------------------------------------------------------------------------------------------------------------|---------------|
| rxn00973 | ACONT          | Aconitase, complete reaction                                  | 4.2.1.3      | Biogenesis of c-type cytochromes; <br>Serine-glyoxylate cycle; <br>TCA Cycle         | BT_2072                                   | The model originally included ACONT, ACONTa and ACONTb, which caused a flux loop. Removing ACONT solves this problem while still allowing the complete reaction to take place.                                                                                                              |               |
| rxn01602 | FOLR2          | DihydrofolateNADP+ oxidoreductase                             | 1.5.1.3      | Folate Biosynthesis; <br>5-FCL-like protein                                          | ( BT_0106 or BT_2048 )                    | Reaction causes balanced cycles and infeasible ATP production and was therefore removed. Removing this reaction does not affect model performance.                                                                                                                                          |               |
| rxn01664 | AADSACYCL      | (S)-2-Amino-6-oxohexanoate hydro-lyase (spontaneous)          | Undetermined | None                                                                                 | No                                        | This spontaneous reaction both produces and consumes metabolites that are not included in the reconstruction.                                                                                                                                                                               |               |
| rxn01981 | Not in BIGG DB | (5-L-Glutamyl)-L-amino-acid 5-glutamyltransferase (cyclizing) | 2.3.2.4      | Glutathione:_Biosynthesis_and_gamma-glutamyl_cycle Glutathione:_gamma-glutamyl_cycle | No                                        | <i>Bacteroides fragilis</i> does not have a pathway for glutathione synthesis. In <i>B. thetaiotaomicron</i> , genes required for glutathione synthesis are absent as well. All reactions involving glutathione were added during auto-completion, there is no evidence for their presence. | PMID:17873045 |
| rxn02166 | Not in BIGG DB | 4-Nitrophenyl phosphate phosphohydrolase                      | 3.1.3.1      | Phosphate metabolism                                                                 | ( BT_3708 ) or ( BT_4363 ) or ( BT_0028 ) | This reaction consumes a metabolite not included in the reconstruction. This reaction is not included in the BIGG database.                                                                                                                                                                 |               |
| rxn02760 | FFSDr          | Sucrose phosphatase                                           | 3.2.1.26     | Sucrose utilization                                                                  | ( BT_1765 ) or ( BT_1759 )                | These enzymes are levansases. It is not likely that they catalyze this reaction.                                                                                                                                                                                                            | PMID:20603004 |
| rxn02916 | AOXHEXYCL      | 6-Amino-2-oxohexanoate cyclation (spontaneous)                | Undetermined | None                                                                                 | No                                        | This spontaneous reaction both produces and consumes metabolites that are not included in the reconstruction.                                                                                                                                                                               |               |
| rxn03012 | Not in BIGG DB | rxn03012                                                      | Undetermined | None                                                                                 | No                                        | This spontaneous reaction both produces and consumes metabolites that are not included in the reconstruction.                                                                                                                                                                               |               |
| rxn03406 | GLNSP1         | Glutamine synthetase (uaaAgl)                                 | 6.3.1.2      | Peptidoglycan biosynthesis                                                           | BT_0785                                   | There is no evidence that this enzyme performs any reaction other than glutamine synthetase in <i>B. thetaiotaomicron</i> .                                                                                                                                                                 |               |
| rxn03407 | GLNSP2         | Glutamine synthetase (uaaGla)                                 | 6.3.1.2      | Peptidoglycan biosynthesis                                                           | BT_0785                                   | There is no evidence that this enzyme performs any reaction other than glutamine synthetase in <i>B. thetaiotaomicron</i> .                                                                                                                                                                 |               |

|          |                |                                                                                                       |              |                                                                     |         |                                                                                                                                                                                                                                                                                                                                        |               |
|----------|----------------|-------------------------------------------------------------------------------------------------------|--------------|---------------------------------------------------------------------|---------|----------------------------------------------------------------------------------------------------------------------------------------------------------------------------------------------------------------------------------------------------------------------------------------------------------------------------------------|---------------|
| rxn03409 | GLNSP3         | Glutamine synthetase (uaagmda)                                                                        | 6.3.1.2      | Peptidoglycan biosynthesis                                          | BT_0785 | There is no evidence that this enzyme performs any reaction other than glutamine synthetase in <i>B. thetaiotaomicron</i> .                                                                                                                                                                                                            |               |
| rxn03535 | Not in BIGG DB | ATPcob(I)yrinic acid-a,c-diamide Cobeta-adenosyltransferase                                           | 2.5.1.17     | G3E family of P-loop GTPases (metallocenter biosynthesis)           | BT_2760 | This enzyme catalyzes several reactions. Since <i>B. thetaiotaomicron</i> does not have a vitamin B12 synthesis pathway, the one most likely to take place in the cell is conversion of uptaken cob(I)alamin to adenosylcobalamin (active vitamin B12 coenzyme) (CBLAT in BIGG). Vitamin B12 is required for methylmalonyl-CoA mutase. | PMID:148460   |
| rxn03843 | FT             | farnesyltranstransferase (trans,trans,cis-geranylgeranyl diphosphate-generating)                      | 2.5.1.31     | Isoprenoid Biosynthesis;<br><br>Polyprenyl Diphosphate Biosynthesis | BT_3726 | BIGG database suggests that this reaction only takes place in humans.                                                                                                                                                                                                                                                                  | BIGG database |
| rxn03975 | FMNRx2         | FMN reductase                                                                                         | 1.-.-.-      | None                                                                | BT_2144 | Produces a dead-end metabolite; annotation is weak (NCBI Gene: putative oxidoreductase).                                                                                                                                                                                                                                               | NCBI Gene     |
| rxn04132 | Not in BIGG DB | 5-hydroxyisourate spontaneous conversion to R-allantoin                                               | Undetermined | None                                                                | No      | This spontaneous reaction both produces and consumes metabolites that are not included in the reconstruction.                                                                                                                                                                                                                          |               |
| rxn04133 | Not in BIGG DB | 5-hydroxyisourate spontaneous conversion to S-allantoin                                               | Undetermined | None                                                                | No      | This spontaneous reaction both produces and consumes metabolites that are not included in the reconstruction.                                                                                                                                                                                                                          |               |
| rxn04456 | Not in BIGG DB | 5-Hydroxy-2-oxo-4-ureido-2,5-dihydro-1H-imidazole-5-carboxylate spontaneous conversion to R-allantoin | Undetermined | None                                                                | No      | This spontaneous reaction both produces and consumes metabolites that are not included in the reconstruction.                                                                                                                                                                                                                          |               |
| rxn04457 | Not in BIGG DB | 5-Hydroxy-2-oxo-4-ureido-2,5-dihydro-1H-imidazole-5-carboxylate spontaneous conversion to S-allantoin | Undetermined | None                                                                | No      | This spontaneous reaction both produces and consumes metabolites that are not included in the reconstruction.                                                                                                                                                                                                                          |               |
| rxn04673 | Not in BIGG DB | 1,4-dihydroxy-2-naphthoate octaprenyltransferase                                                      | EC 2.5.1.-   | Menaquinone and Phylloquinone Biosynthesis                          | BT_2015 | This reaction is necessary for phylloquinone biosynthesis. Phylloquinone is only present in photosynthetic organisms. The gene product of BT_2015 is involved in menaquinone biosynthesis.                                                                                                                                             | PMID:20599680 |

|          |                                             |                                                                               |              |                                                           |                                                    |                                                                                                                                                                                                                                                                                                                                        |                               |
|----------|---------------------------------------------|-------------------------------------------------------------------------------|--------------|-----------------------------------------------------------|----------------------------------------------------|----------------------------------------------------------------------------------------------------------------------------------------------------------------------------------------------------------------------------------------------------------------------------------------------------------------------------------------|-------------------------------|
| rxn04674 | Not in BIGG DB                              | rxn04674                                                                      | EC 2.1.1.-   | Menaquinone and Phylloquinone Biosynthesis                | ( BT_4216 ) or ( BT_0853 )                         | This reaction synthesizes phylloquinone. It is only present in photosynthetic organisms. The gene products of BT_4216 and BT_0853 are involved in menaquinone biosynthesis.                                                                                                                                                            | PMID:20599680                 |
| rxn05029 | CBIAT                                       | ATPcobinamide Cobeta-adenosyltransferase                                      | 2.5.1.17     | G3E family of P-loop GTPases (metallocenter biosynthesis) | BT_2760                                            | This enzyme catalyzes several reactions. Since <i>B. thetaiotaomicron</i> does not have a vitamin B12 synthesis pathway, the one most likely to take place in the cell is conversion of uptaken cob(I)alamin to adenosylcobalamin (active vitamin B12 coenzyme) (CBLAT in BIGG). Vitamin B12 is required for methylmalonyl-CoA mutase. | PMID:148460                   |
| rxn05064 | Not in BIGG DB                              | carbamate hydro-lyase                                                         | 4.2.1.104    | None                                                      | No                                                 | This reaction occurs spontaneously from the product of cyanate lyase (EC 4.2.1.104). No evidence for the presence of this enzyme in <i>B. thetaiotaomicron</i> is available.                                                                                                                                                           | KEGG database                 |
| rxn05193 | Not in BIGG DB                              | Butyro-betaine ABC transport                                                  | 3.6.3.32     | Choline and Betaine Uptake and Betaine Biosynthesis       | ( BT_1749 and BT_1750 and BT_1751 )                | This reaction is not included in the BIGG database and not connected to any pathway.                                                                                                                                                                                                                                                   |                               |
| rxn05502 | Not in BIGG DB                              | L-arginine phosphate transport in/out via proton symport                      | Undetermined | None                                                      | No                                                 | This reaction was added in to allow arginine production from arginine phosphate. Arginine is not essential, so the gaps in arginine biosynthesis were filled. Since arginine synthesis by <i>Bacteroides</i> is only partly known, a sink reaction was necessary.                                                                      | PMID:4853401<br>PMID:16704984 |
| rxn05504 | Not in BIGG DB                              | arsenobetaine transport in via ABC system                                     | 3.6.3.32     | Choline and Betaine Uptake and Betaine Biosynthesis       | ( BT_1749 and BT_1750 and BT_1751 )                | This reaction is not included in the BIGG database and not connected to any pathway.                                                                                                                                                                                                                                                   |                               |
| rxn05517 | Cobalt-zinc-cadmium resistance protein CzcD |                                                                               |              |                                                           |                                                    | Causes balanced cycles, therefore removed.                                                                                                                                                                                                                                                                                             |                               |
| rxn05526 | Not in BIGG DB                              | chromate transport out via proton antiport                                    | TC-2.A.51    | None                                                      | ( BT_2788 and BT_2789 ) or ( BT_1735 and BT_1736 ) | This reaction is not included in the BIGG database and not connected to any pathway.                                                                                                                                                                                                                                                   |                               |
| rxn05567 | GALTpts                                     | Galactitol transport via PEPPyr PTS (phosphoenolpyruvate: phosphotransferase) | 2.7.1.69     | None                                                      | BT_4107                                            | <i>B. thetaiotaomicron</i> does not possess a PTS system.                                                                                                                                                                                                                                                                              | PMID:16887504                 |

|          |                          |                                                                                     |              |                                                                                                                 |                      |                                                                                                                                                                                                                                                                                             |                                                |
|----------|--------------------------|-------------------------------------------------------------------------------------|--------------|-----------------------------------------------------------------------------------------------------------------|----------------------|---------------------------------------------------------------------------------------------------------------------------------------------------------------------------------------------------------------------------------------------------------------------------------------------|------------------------------------------------|
| rxn05613 | METSOX1abc               | L-methionine S-oxide transport via ABC system                                       |              | No                                                                                                              |                      | No evidence for the presence of this transport reaction in <i>B. thetaiotaomicron</i> . BIGG suggests that methionine oxidation to methionine-S-oxide occurs spontaneously (METOX1s).                                                                                                       |                                                |
| rxn05613 | METSOX1abc               | L-methionine S-oxide transport via ABC system                                       | Undetermined | Transporters_In_Models Staphylococcal_pathogenicity_islands_SaPI Methionine_Biosynthesis Methionine_Degradation | No                   | No evidence for the presence of this transport reaction in <i>B. thetaiotaomicron</i> .                                                                                                                                                                                                     |                                                |
| rxn05952 | GTMLT                    | gamma-glutamyltransferase                                                           | 2.3.2.2      | None                                                                                                            | No                   | <i>Bacteroides fragilis</i> does not have a pathway for glutathione synthesis. In <i>B. thetaiotaomicron</i> , genes required for glutathione synthesis are absent as well. All reactions involving glutathione were added during auto-completion, there is no evidence for their presence. | PMID:17873045                                  |
| rxn06472 | GGLUCT2                  | (5-L-Glutamyl)-L-amino-acid 5-glutamyltransferase (cyclizing)                       | 2.3.2.4      | None                                                                                                            | No                   | <i>Bacteroides fragilis</i> does not have a pathway for glutathione synthesis. In <i>B. thetaiotaomicron</i> , genes required for glutathione synthesis are absent as well. All reactions involving glutathione were added during auto-completion, there is no evidence for their presence. | PMID:17873045                                  |
| rxn06526 |                          | Cytochrome c-type biogenesis protein DsbD, protein-disulfide reductase (EC 1.8.1.8) |              |                                                                                                                 |                      | A generic reaction from KEGG that will not be added.                                                                                                                                                                                                                                        |                                                |
| rxn06672 |                          | biotin-carboxyl-carrier-protein:carbon-dioxide ligase (ADP-forming)                 |              |                                                                                                                 |                      | Represented by reaction BTNPL.                                                                                                                                                                                                                                                              |                                                |
| rxn07438 | Not in BIGG DB           | peptide-methionine:thioredoxin-disulfide S-oxidoreductase                           | 1.8.4.12     | Peptide methionine sulfoxide reductase                                                                          | BT_2499              | A generic reaction from KEGG that will not be added. BIGG uses METSOXR1 for this enzyme, which is already present in model.                                                                                                                                                                 |                                                |
| rxn07584 | Lipoate-protein ligase A |                                                                                     |              |                                                                                                                 |                      | This subsystem is not included in the BIGG database.                                                                                                                                                                                                                                        |                                                |
| rxn08085 | AGPAT141                 | Membrane lipid synthesis 14:1/ 16:1                                                 | 2.3.1.51     | Glycerolipid and Glycerophospholipid Metabolism in Bacteria;<br><br>Phosphate metabolism                        | (BT_0243 or BT_4462) | It is unclear whether <i>B. thetaiotaomicron</i> possesses these membrane lipids. Studies did not detect them.                                                                                                                                                                              | PMID:7204330;<br>PMID:6102980;<br>PMID:7440508 |

|          |          |                                      |          |                                                                                                                                               |                          |                                                                                                                                                                                                              |                                          |
|----------|----------|--------------------------------------|----------|-----------------------------------------------------------------------------------------------------------------------------------------------|--------------------------|--------------------------------------------------------------------------------------------------------------------------------------------------------------------------------------------------------------|------------------------------------------|
| rxn08087 | AGPAT161 | Membrane lipid synthesis 14:1/ 16:1  | 2.3.1.51 | Glycerolipid and Glycerophospholipid Metabolism in Bacteria; <br>Phosphate metabolism                                                         | (BT_0243 or BT_4462)     | It is unclear whether <i>B. thetaiotaomicron</i> possesses these membrane lipids. Studies did not detect them.                                                                                               | PMID:7204330; PMID:6102980; PMID:7440508 |
| rxn08308 | DASYN141 | Membrane lipid synthesis 14:1/ 16:1  | 2.7.7.41 | Glycerolipid and Glycerophospholipid Metabolism in Bacteria; <br>Iojap                                                                        | (BT_4006 or BT_4463)     | It is unclear whether <i>B. thetaiotaomicron</i> possesses these membrane lipids. Studies did not detect them.                                                                                               | PMID:7204330; PMID:6102980; PMID:7440508 |
| rxn08310 | DASYN161 | Membrane lipid synthesis 14:1/ 16:1  | 2.7.7.41 | Glycerolipid and Glycerophospholipid Metabolism in Bacteria; <br>Iojap                                                                        | (BT_4006 or BT_4463)     | It is unclear whether <i>B. thetaiotaomicron</i> possesses these membrane lipids. Studies did not detect them.                                                                                               | PMID:7204330; PMID:6102980; PMID:7440508 |
| rxn08783 | LDH_D2   | D-lactate dehydrogenase (ubiquinone) | 1.1.2.4  | Fermentations: Lactate; Fermentations: Mixed acid                                                                                             | false annotation BT_1575 | Only NADH use reported for biochemically characterized lactate dehydrogenase. This reaction is catalyzed by a different enzyme (EC 1.1.2.4) which is not known to be present in <i>B. thetaiotaomicron</i> . | PMID:19525515                            |
| rxn09103 | PGPP141  | Membrane lipid synthesis 14:1/ 16:1  | 3.1.3.27 | Competence or DNA damage-inducible protein CinA and related protein families; <br>Glycerolipid and Glycerophospholipid Metabolism in Bacteria | BT_1525                  | It is unclear whether <i>B. thetaiotaomicron</i> possesses these membrane lipids. Studies did not detect them.                                                                                               | PMID:7204330; PMID:6102980; PMID:7440508 |
| rxn09105 | PGPP161  | Membrane lipid synthesis 14:1/ 16:1  | 3.1.3.27 | Competence or DNA damage-inducible protein CinA and related protein families; <br>Glycerolipid and Glycerophospholipid Metabolism in Bacteria | BT_1525                  | It is unclear whether <i>B. thetaiotaomicron</i> possesses these membrane lipids. Studies did not detect them.                                                                                               | PMID:7204330; PMID:6102980; PMID:7440508 |
| rxn09110 | PGSA141  | Membrane lipid synthesis 14:1/ 16:1  | 2.7.8.5  | Competence or DNA damage-inducible protein CinA and related protein families; <br>Glycerolipid and Glycerophospholipid Metabolism in Bacteria | (BT_1523 or BT_4464)     | It is unclear whether <i>B. thetaiotaomicron</i> possesses these membrane lipids. Studies did not detect them.                                                                                               | PMID:7204330; PMID:6102980; PMID:7440508 |
| rxn09112 | PGSA161  | Membrane lipid synthesis 14:1/ 16:1  | 2.7.8.5  | Competence or DNA damage-inducible protein CinA and related protein families; <br>Glycerolipid and Glycerophospholipid Metabolism in Bacteria | (BT_1523 or BT_4464)     | It is unclear whether <i>B. thetaiotaomicron</i> possesses these membrane lipids. Studies did not detect them.                                                                                               | PMID:7204330; PMID:6102980; PMID:7440508 |
| rxn09199 | PSD141   | Membrane lipid synthesis 14:1/ 16:1  | 4.1.1.65 | Glycerolipid and Glycerophospholipid Metabolism in Bacteria                                                                                   | BT_2231                  | It is unclear whether <i>B. thetaiotaomicron</i> possesses these membrane lipids. Studies did not detect them.                                                                                               | PMID:7204330; PMID:6102980; PMID:7440508 |

|          |                |                                                                                         |              |                                                                     |                                                                                                    |                                                                                                                                                                                                          |                                                                                                                                       |
|----------|----------------|-----------------------------------------------------------------------------------------|--------------|---------------------------------------------------------------------|----------------------------------------------------------------------------------------------------|----------------------------------------------------------------------------------------------------------------------------------------------------------------------------------------------------------|---------------------------------------------------------------------------------------------------------------------------------------|
| rxn09201 | PSD161         | Membrane lipid synthesis 14:1/ 16:1                                                     | 4.1.1.65     | Glycerolipid and Glycerophospholipid Metabolism in Bacteria         | BT_2231                                                                                            | It is unclear whether <i>B. thetaiotaomicron</i> possesses these membrane lipids. Studies did not detect them.                                                                                           | PMID:7204330; PMID:6102980; PMID:7440508                                                                                              |
| rxn09207 | PSSA141        | Membrane lipid synthesis 14:1/ 16:1                                                     | 2.7.8.8      | Glycerolipid and Glycerophospholipid Metabolism in Bacteria         | BT_2232                                                                                            | It is unclear whether <i>B. thetaiotaomicron</i> possesses these membrane lipids. Studies did not detect them.                                                                                           | PMID:7204330; PMID:6102980; PMID:7440508                                                                                              |
| rxn09209 | PSSA161        | Membrane lipid synthesis 14:1/ 16:1                                                     | 2.7.8.8      | Glycerolipid and Glycerophospholipid Metabolism in Bacteria         | BT_2232                                                                                            | It is unclear whether <i>B. thetaiotaomicron</i> possesses these membrane lipids. Studies did not detect them.                                                                                           | PMID:7204330; PMID:6102980; PMID:7440508                                                                                              |
| rxn09978 | Not in BIGG DB | beta-glucosidase (methyl-alpha-D-glucoside)                                             | 3.2.1.21     | Beta-glucosidase (EC 3.2.1.21)                                      | ( BT_3300 ) or ( BT_1778 and BT_1780 ) or ( BT_3009 ) or ( BT_3314 ) or ( BT_2854 ) or ( BT_4714 ) | This reaction is not included in the BIGG database and not connected to any pathway.                                                                                                                     |                                                                                                                                       |
| rxn09979 | Not in BIGG DB | beta-glucosidase                                                                        | 3.2.1.21     | Beta-glucosidase (EC 3.2.1.21)                                      | ( BT_3300 ) or ( BT_1778 and BT_1780 ) or ( BT_3009 ) or ( BT_3314 ) or ( BT_2854 ) or ( BT_4714 ) | This reaction is not included in the BIGG database and not connected to any pathway.                                                                                                                     |                                                                                                                                       |
| rxn09996 |                | Teichuronic acid biosynthesis protein Tuae, putative secreted polysaccharide polymerase |              | - none -                                                            | BT_1165                                                                                            | NCBI Gene does not agree with this annotation. Furthermore, teichuronic acid has only been found in gram-positive cell walls yet.                                                                        |                                                                                                                                       |
| rxn10120 | NO3R1          | periplasmic nitrate reductase                                                           |              | Nitrate reductase (Ubiquinol-8)                                     | BT_0963                                                                                            | <i>Bacteroides</i> do not reduce nitrate to nitrite. Annotation is weak (NCBI Gene: putative ferredoxin-type protein).                                                                                   | Krieg NR (2010) Bergey's manual of systematic bacteriology, 2nd ed., volume 4 (Springer, New York)., NCBI Gene, last updated 08.01.11 |
| rxn10126 | SUCD4          | succinate dehydrogenase                                                                 |              | Succinate dehydrogenase; <br>Serine-glyoxylate cycle; <br>TCA Cycle | ( BT_3054 and BT_3055)                                                                             | The enzyme is present in <i>B. thetaiotaomicron</i> , but the evidence for this subreaction is weak.                                                                                                     |                                                                                                                                       |
| rxn10180 | PNTot4         | Pantothenate transport                                                                  | Undetermined | Coenzyme_A_Biosynthesis                                             | No                                                                                                 | Pantothenate is not an essential nutrient for <i>B. thetaiotaomicron</i> . The gap in pantothenate biosynthesis was filled by adding pantothenate synthetase (PANTS) based on gene annotation from KEGG. | PMID:4853401                                                                                                                          |

|          |                |                                                                     |          |                                              |                           |                                                                                                                                                                                                                                                                                                                                                     |                                                 |
|----------|----------------|---------------------------------------------------------------------|----------|----------------------------------------------|---------------------------|-----------------------------------------------------------------------------------------------------------------------------------------------------------------------------------------------------------------------------------------------------------------------------------------------------------------------------------------------------|-------------------------------------------------|
| rxn10192 | Not in BIGG DB | CDP-glycerolpoly(glycerophosphate) glycerophosphotransferase        | 2.7.8.12 | Teichoic and lipoteichoic acids biosynthesis | ( BT_1650 ) or (BT_1716 ) | <i>Bacteroides thetaiotaomicron</i> is a gram-negative bacterium. Only gram-positive bacteria produce lipoteichoic acids. BT_1339 and BT_2888 are annotated as undecaprenyl-phosphate alpha-N-acetylglucosaminyltransferase and glycosyltransferase, respectively. They may have a role in lipopolysaccharide synthesis, but their role is unclear. | PMID:20452953, NCBI Gene, last updates 04.03.11 |
| rxn10289 | TECA1S160      | palmitoyl-lipoteichoic acid synthesis (n=24), linked, unsubstituted | 2.7.8.12 | Teichoic and lipoteichoic acids biosynthesis | ( BT_1650 ) or (BT_1716 ) | <i>Bacteroides thetaiotaomicron</i> is a gram-negative bacterium. Only gram-positive bacteria produce lipoteichoic acids. BT_1339 and BT_2888 are annotated as undecaprenyl-phosphate alpha-N-acetylglucosaminyltransferase and glycosyltransferase, respectively. They may have a role in lipopolysaccharide synthesis, but their role is unclear. | PMID:20452953, NCBI Gene, last updates 04.03.11 |
| rxn10290 | TECA1S140      | myristoyl-lipoteichoic acid synthesis (n=24), linked, unsubstituted | 2.7.8.12 | Teichoic and lipoteichoic acids biosynthesis | ( BT_1650 ) or (BT_1716 ) | <i>Bacteroides thetaiotaomicron</i> is a gram-negative bacterium. Only gram-positive bacteria produce lipoteichoic acids. BT_1339 and BT_2888 are annotated as undecaprenyl-phosphate alpha-N-acetylglucosaminyltransferase and glycosyltransferase, respectively. They may have a role in lipopolysaccharide synthesis, but their role is unclear. | PMID:20452953, NCBI Gene, last updates 04.03.11 |
| rxn10291 | TECA1S180      | stearoyl-lipoteichoic acid synthesis (n=24), linked, unsubstituted  | 2.7.8.12 | Teichoic and lipoteichoic acids biosynthesis | ( BT_1650 ) or (BT_1716 ) | <i>Bacteroides thetaiotaomicron</i> is a gram-negative bacterium. Only gram-positive bacteria produce lipoteichoic acids. BT_1339 and BT_2888 are annotated as undecaprenyl-phosphate alpha-N-acetylglucosaminyltransferase and glycosyltransferase, respectively. They may have a role in lipopolysaccharide synthesis, but their role is unclear. | PMID:20452953, NCBI Gene, last updates 04.03.11 |

|          |            |                                                                                |          |                                              |                           |                                                                                                                                                                                                                                                                                                                                                     |                                                 |
|----------|------------|--------------------------------------------------------------------------------|----------|----------------------------------------------|---------------------------|-----------------------------------------------------------------------------------------------------------------------------------------------------------------------------------------------------------------------------------------------------------------------------------------------------------------------------------------------------|-------------------------------------------------|
| rxn10292 | TECA1SI17  | isoheptadecanoyl-lipoteichoic acid synthesis (n=24), linked, unsubstituted     | 2.7.8.12 | Teichoic and lipoteichoic acids biosynthesis | ( BT_1650 ) or (BT_1716 ) | <i>Bacteroides thetaiotaomicron</i> is a gram-negative bacterium. Only gram-positive bacteria produce lipoteichoic acids. BT_1339 and BT_2888 are annotated as undecaprenyl-phosphate alpha-N-acetylglucosaminyltransferase and glycosyltransferase, respectively. They may have a role in lipopolysaccharide synthesis, but their role is unclear. | PMID:20452953, NCBI Gene, last updates 04.03.11 |
| rxn10293 | TECA1SAI17 | anteisoheptadecanoyl-lipoteichoic acid synthesis (n=24), linked, unsubstituted | 2.7.8.12 | Teichoic and lipoteichoic acids biosynthesis | ( BT_1650 ) or (BT_1716 ) | <i>Bacteroides thetaiotaomicron</i> is a gram-negative bacterium. Only gram-positive bacteria produce lipoteichoic acids. BT_1339 and BT_2888 are annotated as undecaprenyl-phosphate alpha-N-acetylglucosaminyltransferase and glycosyltransferase, respectively. They may have a role in lipopolysaccharide synthesis, but their role is unclear. | PMID:20452953, NCBI Gene, last updates 04.03.11 |
| rxn10294 | TECA1SI14  | isotetradecanoyl-lipoteichoic acid synthesis (n=24), linked, unsubstituted     | 2.7.8.12 | Teichoic and lipoteichoic acids biosynthesis | ( BT_1650 ) or (BT_1716 ) | <i>Bacteroides thetaiotaomicron</i> is a gram-negative bacterium. Only gram-positive bacteria produce lipoteichoic acids. BT_1339 and BT_2888 are annotated as undecaprenyl-phosphate alpha-N-acetylglucosaminyltransferase and glycosyltransferase, respectively. They may have a role in lipopolysaccharide synthesis, but their role is unclear. | PMID:20452953, NCBI Gene, last updates 04.03.11 |
| rxn10295 | TECA1SI15  | isopentadecanoyl-lipoteichoic acid synthesis (n=24), linked, unsubstituted     | 2.7.8.12 | Teichoic and lipoteichoic acids biosynthesis | ( BT_1650 ) or (BT_1716 ) | <i>Bacteroides thetaiotaomicron</i> is a gram-negative bacterium. Only gram-positive bacteria produce lipoteichoic acids. BT_1339 and BT_2888 are annotated as undecaprenyl-phosphate alpha-N-acetylglucosaminyltransferase and glycosyltransferase, respectively. They may have a role in lipopolysaccharide synthesis, but their role is unclear. | PMID:20452953, NCBI Gene, last updates 04.03.11 |

|          |            |                                                                                       |          |                                              |                            |                                                                                                                                                                                                                                                                                                                                                     |                                                 |
|----------|------------|---------------------------------------------------------------------------------------|----------|----------------------------------------------|----------------------------|-----------------------------------------------------------------------------------------------------------------------------------------------------------------------------------------------------------------------------------------------------------------------------------------------------------------------------------------------------|-------------------------------------------------|
| rxn10296 | TECA1SAI15 | anteisopentadecanoyl-lipoteichoic acid synthesis (n=24), linked, unsubstituted        | 2.7.8.12 | Teichoic and lipoteichoic acids biosynthesis | ( BT_1650 ) or ( BT_1716 ) | <i>Bacteroides thetaiotaomicron</i> is a gram-negative bacterium. Only gram-positive bacteria produce lipoteichoic acids. BT_1339 and BT_2888 are annotated as undecaprenyl-phosphate alpha-N-acetylglucosaminyltransferase and glycosyltransferase, respectively. They may have a role in lipopolysaccharide synthesis, but their role is unclear. | PMID:20452953, NCBI Gene, last updates 04.03.11 |
| rxn10297 | TECA1SI16  | isohexadecanoyl-lipoteichoic acid synthesis (n=24), linked, unsubstituted             | 2.7.8.12 | Teichoic and lipoteichoic acids biosynthesis | ( BT_1650 ) or ( BT_1716 ) | <i>Bacteroides thetaiotaomicron</i> is a gram-negative bacterium. Only gram-positive bacteria produce lipoteichoic acids. BT_1339 and BT_2888 are annotated as undecaprenyl-phosphate alpha-N-acetylglucosaminyltransferase and glycosyltransferase, respectively. They may have a role in lipopolysaccharide synthesis, but their role is unclear. | PMID:20452953, NCBI Gene, last updates 04.03.11 |
| rxn10307 | TECA5S160  | palmitoyl-lipoteichoic acid synthesis (n=24), linked, N-acetylglucosamine substituted | 2.7.8.12 | Teichoic and lipoteichoic acids biosynthesis | ( BT_1339 ) or ( BT_2888 ) | <i>Bacteroides thetaiotaomicron</i> is a gram-negative bacterium. Only gram-positive bacteria produce lipoteichoic acids. BT_1339 and BT_2888 are annotated as undecaprenyl-phosphate alpha-N-acetylglucosaminyltransferase and glycosyltransferase, respectively. They may have a role in lipopolysaccharide synthesis, but their role is unclear. | PMID:20452953, NCBI Gene, last updates 04.03.11 |
| rxn10308 | TECA5S140  | myristoyl-lipoteichoic acid synthesis (n=24), linked, N-acetylglucosamine substituted | 2.7.8.12 | Teichoic and lipoteichoic acids biosynthesis | ( BT_1339 ) or ( BT_2888 ) | <i>Bacteroides thetaiotaomicron</i> is a gram-negative bacterium. Only gram-positive bacteria produce lipoteichoic acids. BT_1339 and BT_2888 are annotated as undecaprenyl-phosphate alpha-N-acetylglucosaminyltransferase and glycosyltransferase, respectively. They may have a role in lipopolysaccharide synthesis, but their role is unclear. | PMID:20452953, NCBI Gene, last updates 04.03.11 |

|          |            |                                                                                                  |          |                                              |                            |                                                                                                                                                                                                                                                                                                                                                     |                                                 |
|----------|------------|--------------------------------------------------------------------------------------------------|----------|----------------------------------------------|----------------------------|-----------------------------------------------------------------------------------------------------------------------------------------------------------------------------------------------------------------------------------------------------------------------------------------------------------------------------------------------------|-------------------------------------------------|
| rxn10309 | TECA5SI180 | stearoyl-lipoteichoic acid synthesis (n=24), linked, N-acetylglucosamine substituted             | 2.7.8.12 | Teichoic and lipoteichoic acids biosynthesis | ( BT_1339 ) or ( BT_2888 ) | <i>Bacteroides thetaiotaomicron</i> is a gram-negative bacterium. Only gram-positive bacteria produce lipoteichoic acids. BT_1339 and BT_2888 are annotated as undecaprenyl-phosphate alpha-N-acetylglucosaminyltransferase and glycosyltransferase, respectively. They may have a role in lipopolysaccharide synthesis, but their role is unclear. | PMID:20452953, NCBI Gene, last updates 04.03.11 |
| rxn10310 | TECA5SI17  | isoheptadecanoyl-lipoteichoic acid synthesis (n=24), linked, N-acetylglucosamine substituted     | 2.7.8.12 | Teichoic and lipoteichoic acids biosynthesis | ( BT_1339 ) or ( BT_2888 ) | <i>Bacteroides thetaiotaomicron</i> is a gram-negative bacterium. Only gram-positive bacteria produce lipoteichoic acids. BT_1339 and BT_2888 are annotated as undecaprenyl-phosphate alpha-N-acetylglucosaminyltransferase and glycosyltransferase, respectively. They may have a role in lipopolysaccharide synthesis, but their role is unclear. | PMID:20452953, NCBI Gene, last updates 04.03.11 |
| rxn10311 | TECA5SAI17 | anteisoheptadecanoyl-lipoteichoic acid synthesis (n=24), linked, N-acetylglucosamine substituted | 2.7.8.12 | Teichoic and lipoteichoic acids biosynthesis | ( BT_1339 ) or ( BT_2888 ) | <i>Bacteroides thetaiotaomicron</i> is a gram-negative bacterium. Only gram-positive bacteria produce lipoteichoic acids. BT_1339 and BT_2888 are annotated as undecaprenyl-phosphate alpha-N-acetylglucosaminyltransferase and glycosyltransferase, respectively. They may have a role in lipopolysaccharide synthesis, but their role is unclear. | PMID:20452953, NCBI Gene, last updates 04.03.11 |
| rxn10312 | TECA5SI14  | isotetradecanoyl-lipoteichoic acid synthesis (n=24), linked, N-acetylglucosamine substituted     | 2.7.8.12 | Teichoic and lipoteichoic acids biosynthesis | ( BT_1339 ) or ( BT_2888 ) | <i>Bacteroides thetaiotaomicron</i> is a gram-negative bacterium. Only gram-positive bacteria produce lipoteichoic acids. BT_1339 and BT_2888 are annotated as undecaprenyl-phosphate alpha-N-acetylglucosaminyltransferase and glycosyltransferase, respectively. They may have a role in lipopolysaccharide synthesis, but their role is unclear. | PMID:20452953, NCBI Gene, last updates 04.03.11 |

|          |            |                                                                                                  |              |                                              |                            |                                                                                                                                                                                                                                                                                                                                                     |                                                 |
|----------|------------|--------------------------------------------------------------------------------------------------|--------------|----------------------------------------------|----------------------------|-----------------------------------------------------------------------------------------------------------------------------------------------------------------------------------------------------------------------------------------------------------------------------------------------------------------------------------------------------|-------------------------------------------------|
| rxn10313 | TECA5SI15  | isopentadecanoyl-lipoteichoic acid synthesis (n=24), linked, N-acetylglucosamine substituted     | 2.7.8.12     | Teichoic and lipoteichoic acids biosynthesis | ( BT_1339 ) or ( BT_2888 ) | <i>Bacteroides thetaiotaomicron</i> is a gram-negative bacterium. Only gram-positive bacteria produce lipoteichoic acids. BT_1339 and BT_2888 are annotated as undecaprenyl-phosphate alpha-N-acetylglucosaminyltransferase and glycosyltransferase, respectively. They may have a role in lipopolysaccharide synthesis, but their role is unclear. | PMID:20452953, NCBI Gene, last updates 04.03.11 |
| rxn10314 | TECA5SAI15 | anteisopentadecanoyl-lipoteichoic acid synthesis (n=24), linked, N-acetylglucosamine substituted | 2.7.8.12     | Teichoic and lipoteichoic acids biosynthesis | ( BT_1339 ) or ( BT_2888 ) | <i>Bacteroides thetaiotaomicron</i> is a gram-negative bacterium. Only gram-positive bacteria produce lipoteichoic acids. BT_1339 and BT_2888 are annotated as undecaprenyl-phosphate alpha-N-acetylglucosaminyltransferase and glycosyltransferase, respectively. They may have a role in lipopolysaccharide synthesis, but their role is unclear. | PMID:20452953, NCBI Gene, last updates 04.03.11 |
| rxn10315 | TECA5SI16  | isohexadecanoyl-lipoteichoic acid synthesis (n=24), linked, N-acetylglucosamine substituted      | 2.7.8.12     | Teichoic and lipoteichoic acids biosynthesis | ( BT_1339 ) or ( BT_2888 ) | <i>Bacteroides thetaiotaomicron</i> is a gram-negative bacterium. Only gram-positive bacteria produce lipoteichoic acids. BT_1339 and BT_2888 are annotated as undecaprenyl-phosphate alpha-N-acetylglucosaminyltransferase and glycosyltransferase, respectively. They may have a role in lipopolysaccharide synthesis, but their role is unclear. | PMID:20452953, NCBI Gene, last updates 04.03.11 |
| rxn10829 | GTHRDt2    | glutathione transport                                                                            | Undetermined | None                                         | No                         | <i>Bacteroides fragilis</i> does not have a pathway for glutathione synthesis. In <i>B. thetaiotaomicron</i> , genes required for glutathione synthesis are absent as well. All reactions involving glutathione were added during auto-completion, there is no evidence for their presence.                                                         | PMID:17873045                                   |
| rxn11268 | PPIt2r     | Probable low-affinity inorganic phosphate transporter                                            |              | Phosphate metabolism                         | BT_4637                    | A pyrophosphate transporter is not included in the BIGG database. Only phosphate transport (Plt6) will be added to the reconstruction.                                                                                                                                                                                                              |                                                 |

|          |                |                        |              |                                                                           |                                                     |                                                                                                                                                                   |              |
|----------|----------------|------------------------|--------------|---------------------------------------------------------------------------|-----------------------------------------------------|-------------------------------------------------------------------------------------------------------------------------------------------------------------------|--------------|
| rxn12666 | PYDXtr         | Pyridoxal transport    | Undetermined | None                                                                      | No                                                  | Pyridoxal is not an essential nutrient for <i>B. thetaiotaomicron</i> . Therefore, vitamin B6 biosynthesis needs to be possible without uptake of any precursors. | PMID:4853401 |
| rxn12844 | Not in BIGG DB | Gly-Cys aminopeptidase | E3.4.11.2    | Dipeptidases (EC 3.4.13.-);<br><br>Recycling of Peptidoglycan Amino Acids | ((BT_2706) or (BT_0638) or (BT_1615) or (BT_4045) ) | Replaced with AMPTASECG                                                                                                                                           |              |
| rxn13782 | Not in BIGG DB | Protein biosynthesis   | Undetermined |                                                                           | No                                                  | A generic reaction that will not be included.                                                                                                                     |              |
| rxn13783 | Not in BIGG DB | DNA replication        | Undetermined |                                                                           | No                                                  | A generic reaction that will not be included.                                                                                                                     |              |
| rxn13784 | Not in BIGG DB | RNA transcription      | Undetermined |                                                                           | No                                                  | A generic reaction that will not be included.                                                                                                                     |              |

Table S10e: Reactions added to the automated reconstruction based on evidence literature and for gapfilling.

| BIGG Rxn ID     | Function                                           | GPR                                                                         | Subsystem                                  | Reason for addition                           | Reference                    | Notes                                                                                                                                                                                                                                                                                                             | EC Number |
|-----------------|----------------------------------------------------|-----------------------------------------------------------------------------|--------------------------------------------|-----------------------------------------------|------------------------------|-------------------------------------------------------------------------------------------------------------------------------------------------------------------------------------------------------------------------------------------------------------------------------------------------------------------|-----------|
| 12ETHDt         | 1,2-Ethanediol facilitated transport               |                                                                             | Transport, Extracellular                   | Evidence from KEGG database                   |                              | KEGG Pathway suggests that this metabolite is formed.                                                                                                                                                                                                                                                             |           |
| 12PPDRt         | R-Propane-1,2-diol facilitated transport           |                                                                             | Transport, Extracellular                   | Evidence from literature                      | PMID:18848625, PMID:8370454  | Fermentation of rhamnose leads to secretion of propane-1,2-diol as end product. R-propane-1,2-diol is formed via methylglyoxal (PMID:8370454). Gene is unknown.                                                                                                                                                   |           |
| 12PPDt          | S-Propane-1,2-diol facilitated transport           |                                                                             | Transport, Extracellular                   | Evidence from literature                      | PMID:17448155, PMID:18848625 | Fermentation of fucose and rhamnose leads to secretion of propane-1,2-diol as end product. Gene is unknown.                                                                                                                                                                                                       |           |
| 2FUCLAC_FUCASEe | alpha-fucosidase, 2-fucosyllactose (extracellular) | ((BT_1625 or BT_4136) and ((BT_4134 and BT_4135) or (BT_1630 and BT_1631))) | HMO Degradation                            | Evidence from literature                      | PMID: 22036470               | <i>B. thetaiotaomicron</i> grows on human milk oligosaccharides (HMOs); numerous glycosidase hydrolases are upregulated during growth on HMOs. Involves alpha-fucosidase and susC/ SusD (binding proteins).                                                                                                       |           |
| 2MMALD          | (R)-2-methylmalate dehydratase                     | (BT_1859 and BT_1860)                                                       | Valine, Leucine, and Isoleucine Metabolism | Manually added gene annotation from databases |                              | Added based on annotation from KEGG                                                                                                                                                                                                                                                                               | 4.2.1.35  |
| 2MMALD2         | 3-isopropylmalate/(R)-2-methylmalate dehydratase   | (BT_1859 and BT_1860)                                                       | Valine, Leucine, and Isoleucine Metabolism | Manually added gene annotation from databases |                              | Added based on annotation from KEGG                                                                                                                                                                                                                                                                               | 4.2.1.35  |
| 3DSPHR          | 3-Dehydrosphinganine reductase                     |                                                                             | Sphingolipid Metabolism                    | Evidence from literature                      | PMID:16887518, PMID:20855611 | <i>Bacteroides</i> are well established to produce sphingolipids. However, no homolog of human 3DSPHR was found in <i>Bacteroides</i> species. Either <i>Bacteroides</i> have structural homologs of this enzyme, which are not revealed by BLASTP search, or sphingolipids are synthesized by another mechanism. | 1.1.1.102 |
| 3FUCLAC_FUCASEe | alpha-fucosidase, 3-fucosyllactose (extracellular) | ((BT_1625 or BT_4136) and ((BT_4134 and BT_4135) or (BT_1630 and BT_1631))) | HMO Degradation                            | Evidence from literature                      | PMID: 22036470               | <i>B. thetaiotaomicron</i> grows on human milk oligosaccharides (HMOs); numerous glycosidase hydrolases are upregulated during growth on HMOs. Involves alpha-fucosidase and susC/ SusD (binding proteins).                                                                                                       |           |

| BIGG Rxn ID | Function                                                   | GPR                                              | Subsystem                  | Reason for addition      | Reference                                   | Notes                                                                                                                                               | EC Number |
|-------------|------------------------------------------------------------|--------------------------------------------------|----------------------------|--------------------------|---------------------------------------------|-----------------------------------------------------------------------------------------------------------------------------------------------------|-----------|
| 3HACPR1     | 3-hydroxyacyl-ACP-dehydratase (FabZ)                       | BT_4206                                          | Biotin Metabolism          | Evidence from literature | PMID:20693992                               | Based on biotin synthesis described in PMID:20693992 for <i>E. coli</i> .                                                                           |           |
| 3HACPR2     | 3-hydroxyacyl-ACP-dehydratase (FabZ)                       | BT_4206                                          | Biotin Metabolism          | Evidence from literature | PMID:20693992                               | Based on biotin synthesis described in PMID:20693992 for <i>E. coli</i>                                                                             |           |
| 3HAD121     | 3-hydroxyacyl-[acyl-carrier-protein] dehydratase (n-C12:1) | BT_4206                                          | Cell Envelope Biosynthesis | Evidence from literature | PMID: 6102980, PMID: 7440508, PMID: 7204330 | The fatty acid composition of <i>B. thetaiotaomicron</i> was determined experimentally.                                                             | 4.2.1.61  |
| 3HAD141     | 3-hydroxyacyl-[acyl-carrier-protein] dehydratase (n-C14:1) | BT_4206                                          | Cell Envelope Biosynthesis | Evidence from literature | PMID: 6102980, PMID: 7440508, PMID: 7204330 | The fatty acid composition of <i>B. thetaiotaomicron</i> was determined experimentally.                                                             | 4.2.1.61  |
| 3HAD161     | 3-hydroxyacyl-[acyl-carrier-protein] dehydratase (n-C16:1) | BT_4206                                          | Cell Envelope Biosynthesis | Evidence from literature | PMID: 6102980, PMID: 7440508, PMID: 7204330 | The fatty acid composition of <i>B. thetaiotaomicron</i> was determined experimentally.                                                             | 4.2.1.61  |
| 3HAD181     | 3-hydroxyacyl-[acyl-carrier-protein] dehydratase (n-C18:1) | BT_4206                                          | Cell Envelope Biosynthesis | Evidence from literature | PMID: 6102980, PMID: 7440508, PMID: 7204330 | The fatty acid composition of <i>B. thetaiotaomicron</i> was determined experimentally.                                                             | 4.2.1.61  |
| 3OACPR1     | 3-ketoacyl-ACP-reductase (FabG)                            | BT_0409                                          | Biotin Metabolism          | Evidence from literature | PMID:20693992                               | Based on biotin synthesis described in PMID:20693992 for <i>E. coli</i> . BT_0409 was considered the most likely putatively annotated gene for FabG |           |
| 3OACPR2     | 3-ketoacyl-ACP-reductase (FabG)                            | BT_0409                                          | Biotin Metabolism          | Evidence from literature | PMID:20693992                               | Based on biotin synthesis described in PMID:20693992 for <i>E. coli</i> . BT_0409 was considered the most likely putatively annotated gene for FabG |           |
| 3OAR121     | 3-oxoacyl-[acyl-carrier-protein] reductase (n-C12:1)       | (BT_0972 or BT_2380)                             | Cell Envelope Biosynthesis | Evidence from literature | PMID: 6102980, PMID: 7440508, PMID: 7204330 | The fatty acid composition of <i>B. thetaiotaomicron</i> was determined experimentally.                                                             | 1.1.1.100 |
| 3OAR141     | 3-oxoacyl-[acyl-carrier-protein] reductase (n-C14:1)       | (BT_0972 or BT_2380)                             | Cell Envelope Biosynthesis | Evidence from literature | PMID: 6102980, PMID: 7440508, PMID: 7204330 | The fatty acid composition of <i>B. thetaiotaomicron</i> was determined experimentally.                                                             | 1.1.1.100 |
| 3OAR161     | 3-oxoacyl-[acyl-carrier-protein] reductase (n-C16:1)       | (BT_0972 or BT_2380)                             | Cell Envelope Biosynthesis | Evidence from literature | PMID: 6102980, PMID: 7440508, PMID: 7204330 | The fatty acid composition of <i>B. thetaiotaomicron</i> was determined experimentally.                                                             | 1.1.1.100 |
| 3OAR181     | 3-oxoacyl-[acyl-carrier-protein] reductase (n-C18:1)       | (BT_0972 or BT_2380)                             | Cell Envelope Biosynthesis | Evidence from literature | PMID: 6102980, PMID: 7440508, PMID: 7204330 | The fatty acid composition of <i>B. thetaiotaomicron</i> was determined experimentally.                                                             | 1.1.1.100 |
| 3OAS121     | 3-oxoacyl-[acyl-carrier-protein] synthase (n-C12:1)        | ((BT_0122 and BT_3358) or (BT_3358 and BT_3834)) | Cell Envelope Biosynthesis | Evidence from literature | PMID: 6102980, PMID: 7440508, PMID: 7204330 | The fatty acid composition of <i>B. thetaiotaomicron</i> was determined experimentally.                                                             | 2.3.1.41  |

| BIGG Rxn ID | Function                                            | GPR                                              | Subsystem                                  | Reason for addition      | Reference                                   | Notes                                                                                                                                                                                                                                                                                                                                                                                                                                                                                                                                                                                                                                              | EC Number |
|-------------|-----------------------------------------------------|--------------------------------------------------|--------------------------------------------|--------------------------|---------------------------------------------|----------------------------------------------------------------------------------------------------------------------------------------------------------------------------------------------------------------------------------------------------------------------------------------------------------------------------------------------------------------------------------------------------------------------------------------------------------------------------------------------------------------------------------------------------------------------------------------------------------------------------------------------------|-----------|
| 3OAS141     | 3-oxoacyl-[acyl-carrier-protein] synthase (n-C14:1) | ((BT_0122 and BT_3358) or (BT_3358 and BT_3834)) | Cell Envelope Biosynthesis                 | Evidence from literature | PMID: 6102980, PMID: 7440508, PMID: 7204330 | The fatty acid composition of <i>B. thetaiotaomicron</i> was determined experimentally.                                                                                                                                                                                                                                                                                                                                                                                                                                                                                                                                                            | 2.3.1.41  |
| 3OAS161     | 3-oxoacyl-[acyl-carrier-protein] synthase (n-C16:1) | ((BT_0122 and BT_3358) or (BT_3358 and BT_3834)) | Cell Envelope Biosynthesis                 | Evidence from literature | PMID: 6102980, PMID: 7440508, PMID: 7204330 | The fatty acid composition of <i>B. thetaiotaomicron</i> was determined experimentally.                                                                                                                                                                                                                                                                                                                                                                                                                                                                                                                                                            | 2.3.1.41  |
| 3OAS181     | 3-oxoacyl-[acyl-carrier-protein] synthase (n-C18:1) | ((BT_0122 and BT_3358) or (BT_3358 and BT_3834)) | Cell Envelope Biosynthesis                 | Evidence from literature | PMID: 6102980, PMID: 7440508, PMID: 7204330 | The fatty acid composition of <i>B. thetaiotaomicron</i> was determined experimentally.                                                                                                                                                                                                                                                                                                                                                                                                                                                                                                                                                            | 2.3.1.41  |
| 3POPDC      | phosphonopyruvate decarboxylase                     | BT_1719                                          | Capsular Polysaccharide Biosynthesis       | Evidence from literature | PMID:12904299                               | The enzyme catalyses a step in the biosynthetic pathway of 2-aminoethylphosphonate, a component of the capsular polysaccharide complex of <i>Bacteroides fragilis</i> and most likely other <i>Bacteroides</i> species. Requires thiamine diphosphate and Mg <sup>2+</sup> as cofactors. The enzyme is activated by the divalent cations Mg <sup>2+</sup> , Ca <sup>2+</sup> and Mn <sup>2+</sup> . Pyruvate and sulfoxyruvate can also act as substrates, but more slowly. This enzyme drives the reaction catalysed by EC 5.4.2.9, phosphoenolpyruvate mutase, in the thermodynamically unfavourable direction of 3-phosphonopyruvate formation. | 4.1.1.82  |
| 5DOAN       | 5'-deoxyadenosine nucleosidase                      | BT_4451                                          | Cofactor and Prosthetic Group Biosynthesis | Evidence from literature | PMID:21166890                               | This reaction is catalyzed by Methylthioadenosine/S-adenosylhomocysteine nucleosidase.                                                                                                                                                                                                                                                                                                                                                                                                                                                                                                                                                             |           |
| 7AHSDH      | 7-alpha-hydroxysteroid dehydrogenase                | BT_1911                                          | Bile Acid Metabolism                       | Evidence from literature | PMID:189820                                 | Partly purified and characterized (PMID:189820) and annotated in <i>B. thetaiotaomicron</i> genome                                                                                                                                                                                                                                                                                                                                                                                                                                                                                                                                                 | 1.1.1.159 |

| BIGG Rxn ID | Function                                                                            | GPR                                                                                                                                | Subsystem                       | Reason for addition      | Reference     | Notes                                                                                                                                                                                                                            | EC Number |
|-------------|-------------------------------------------------------------------------------------|------------------------------------------------------------------------------------------------------------------------------------|---------------------------------|--------------------------|---------------|----------------------------------------------------------------------------------------------------------------------------------------------------------------------------------------------------------------------------------|-----------|
| 7OCHOLATEt2 | 3alpha,12alpha-Dihydroxy-7-oxo-5beta-cholanate transport out via sodium cotransport |                                                                                                                                    | Transport, Extracellular        | Evidence from literature | PMID:16299351 | <i>B. thetaiotaomicron</i> cannot completely epimerize bile acids. Further biotransformation of bile acid is performed by other gut bacteria (reviewed in PMID:16299351). Therefore, secretion of metabolized bile acid assumed. |           |
| A_MANASEe   | alpha-mannosidase, extracellular                                                    | (BT_3774 or BT_3990 or BT_3991 or BT_2199 or BT_2105 or BT_4072 or BT_4092 or BT_3994 or BT_3784 or BT_3527 or BT_3530 or BT_2629) | N-Glycan Degradation            | Evidence from literature | PMID:18996345 | <i>B. thetaiotaomicron</i> is known to degrade host N-glycans.                                                                                                                                                                   | 3.2.1.24  |
| ACETOLt     | Acetol facilitated transport                                                        |                                                                                                                                    | Transport, Extracellular        | Evidence from literature | PMID:11260473 | <i>B. thetaiotaomicron</i> produces acetol.                                                                                                                                                                                      |           |
| ACGALK3     | N-acetylgalactosamine kinase (6-phosphate)                                          |                                                                                                                                    | Aminosugar Metabolism           | Evidence from literature | PMID:2845859  | <i>B. thetaiotaomicron</i> grows on N-acetylgalactosamine: PMID:2845859. However, the utilization pathway is poorly understood.                                                                                                  |           |
| ACGALr      | N-acetylgalactosamine reversible transport via proton symport                       |                                                                                                                                    | Transport, Extracellular        | Evidence from literature | PMID:2845859  | <i>B. thetaiotaomicron</i> grows on N-acetylgalactosamine: PMID:2845859. However, the utilization pathway is poorly understood.                                                                                                  |           |
| ACGAMPM     | phosphoacetylglucosaminase mutase                                                   |                                                                                                                                    | Aminosugar Metabolism           | Manual gapfilling        | PMID:7240086  | Manually filled in based on KEGG Pathway to make N-acetylglucosamine, a substrate known to support growth, usable.                                                                                                               | 5.4.2.3   |
| ACGAMtr     | Na-acetylglucosamine transport in via proton symport, reversible                    | (BT_3180 or BT_3619)                                                                                                               | Transport, Extracellular        | Evidence from literature | PMID:7240086  | <i>B. thetaiotaomicron</i> grows on N-acetylglucosamine as sole carbon source. Gene annotation taken from The SEED Viewer (last checked 01.07.11).                                                                               |           |
| ACGS        | N-acetylglutamate synthase                                                          |                                                                                                                                    | Arginine and Proline Metabolism | Manual gapfilling        |               | No GPR association available, but all reaction following up from this reaction to acetylornithine deacetylase are present, so a complete pathway was assumed.                                                                    | 2.3.1.1   |

| BIGG Rxn ID | Function                                                                  | GPR                                                                                                                                                                 | Subsystem                            | Reason for addition                           | Reference                    | Notes                                                                                                                                                              | EC Number |
|-------------|---------------------------------------------------------------------------|---------------------------------------------------------------------------------------------------------------------------------------------------------------------|--------------------------------------|-----------------------------------------------|------------------------------|--------------------------------------------------------------------------------------------------------------------------------------------------------------------|-----------|
| ACNAM9PL2   | 2-keto-3-deoxy-d-glycero-d-galacto-9-phosphononic acid (KDN-9-P) synthase | BT_1714                                                                                                                                                             | Capsular Polysaccharide Biosynthesis | Evidence from literature                      | PMID: 18804026               | <i>B. thetaiotaomicron</i> forms and cytidylates 2-keto-3-deoxy-D-glycero-D-galacto-nononic acid (KDN), most likely for inclusion in its capsular polysaccharides. | 2.5.1.56  |
| ACS         | acetyl-CoA synthetase                                                     | BT_2924                                                                                                                                                             | Glycolysis/Gluconeogenesis           | Manually added gene annotation from databases |                              | Annotation from NCBI Gene, last updated 21.05.11                                                                                                                   | 6.2.1.1   |
| ACS2        | acetyl-CoA synthase (propionate)                                          | BT_2924                                                                                                                                                             | Glycolysis/Gluconeogenesis           | Manually added gene annotation from databases |                              | Annotation from NCBI Gene, last updated 21.05.11                                                                                                                   | 6.2.1.1   |
| ACtr        | acetate transporter                                                       |                                                                                                                                                                     | Transport, Extracellular             | Evidence from literature                      | PMID:19321416, PMID:12740060 | <i>Bacteroides</i> species are well established to produce short-chain fatty acids (SCFAs).                                                                        |           |
| AGDC2       | N-acetylgalactosamine-6-phosphate amidohydrolase                          | (BT_0675 or BT_0676 or BT_3588)                                                                                                                                     | Aminosugar Metabolism                | Evidence from literature                      | PMID:2845859                 | <i>B. thetaiotaomicron</i> grows on N-acetylgalactosamine. Utilization pathway is based on assumption.                                                             | 3.5.1.25  |
| AGMHE       | ADP-D-glycero-D-manno-heptose epimerase                                   |                                                                                                                                                                     | Lipopolysaccharide Biosynthesis      | Evidence from literature                      | PMID:20974832                | No gene found, but this reaction is required for lipopolysaccharide synthesis. The structure of <i>B. thetaiotaomicron</i> LPS has been studied.                   | 5.1.3.20  |
| AHEXASE2e   | N-acetylglucosaminidase, N-glycans, extracellular                         | (BT_4394 or BT_4395 or BT_4337 or BT_3598 or BT_1627 or BT_3868 or BT_0459 or BT_0460 or BT_0506 or BT_4681 or BT_1621 or BT_3178 or BT_0456 or BT_1051 or BT_2459) | N-Glycan Degradation                 | Evidence from literature                      | PMID:16565725, PMID:20689974 | BT_4395 gene product was purified and characterized.                                                                                                               |           |

| BIGG Rxn ID | Function                                              | GPR                                                                                                                                                                 | Subsystem                          | Reason for addition                           | Reference                    | Notes                                                                                                                | EC Number |
|-------------|-------------------------------------------------------|---------------------------------------------------------------------------------------------------------------------------------------------------------------------|------------------------------------|-----------------------------------------------|------------------------------|----------------------------------------------------------------------------------------------------------------------|-----------|
| AHEXASE3e   | beta-N-acetylhexosaminidase, extracellular            | (BT_4394 or BT_4395 or BT_4337 or BT_3598 or BT_1627 or BT_3868 or BT_0459 or BT_0460 or BT_0506 or BT_4681 or BT_1621 or BT_3178 or BT_0456 or BT_1051 or BT_2459) | N-Glycan Degradation               | Evidence from literature                      | PMID:16565725, PMID:20689974 | BT_4395 gene product was purified and characterized.                                                                 | 3.2.1.52  |
| AHEXASEe    | beta-N-acetylhexosaminidase, extracellular            | (BT_4394 or BT_4395 or BT_4337 or BT_3598 or BT_1627 or BT_3868 or BT_0459 or BT_0460 or BT_0506 or BT_4681 or BT_1621 or BT_3178 or BT_0456 or BT_1051 or BT_2459) | N-Glycan Degradation               | Evidence from literature                      | PMID:16565725, PMID:20689974 | BT_4395 gene product was purified and characterized.                                                                 | 3.2.1.52  |
| AIRC3       | phosphoribosylaminoimidazole carboxylase (mutase rxn) | BT_2518                                                                                                                                                             | Purine and Pyrimidine Biosynthesis | Based on BIGG database                        |                              | According to KEGG and BIGG databases, phosphoribosylaminoimidazole carboxylase also catalyzes NCAIR mutase reaction. | 4.1.1.21  |
| ALAALADe    | D-alanine-D-alanine dipeptidase, extracellular        | (BT_3007 or BT_3187)                                                                                                                                                | Peptide Degradation                | Evidence from literature                      | PMID:12663928                | Predicted non-cytosolic in PMID:12663928. Assumed to be extracellular for modeling purposes.                         | 3.4.17.14 |
| ALAASPt     | L-alanyl-L-aspartate transport via proton symport     | (BT_0580 or BT_4385 or BT_1086)                                                                                                                                     | Transport, Extracellular           | Manually added gene annotation from databases |                              | Genes added based on TransportDB (last consulted 06.06.12).                                                          |           |
| ALAGLNt     | L-alanyl-L-glutamine transport via proton symport     | (BT_0580 or BT_4385 or BT_1086)                                                                                                                                     | Transport, Extracellular           | Manually added gene annotation from databases |                              | Genes added based on TransportDB (last consulted 06.06.12).                                                          |           |

| <b>BIGG Rxn ID</b> | <b>Function</b>                                   | <b>GPR</b>                      | <b>Subsystem</b>                 | <b>Reason for addition</b>                    | <b>Reference</b>                           | <b>Notes</b>                                                                                                                                                                                                                                                                                                                                       | <b>EC Number</b> |
|--------------------|---------------------------------------------------|---------------------------------|----------------------------------|-----------------------------------------------|--------------------------------------------|----------------------------------------------------------------------------------------------------------------------------------------------------------------------------------------------------------------------------------------------------------------------------------------------------------------------------------------------------|------------------|
| ALAGLUt            | L-alanyl-L-glutamate transport via proton symport | (BT_0580 or BT_4385 or BT_1086) | Transport, Extracellular         | Manually added gene annotation from databases |                                            | Genes added based on TransportDB (last consulted 06.06.12).                                                                                                                                                                                                                                                                                        |                  |
| ALAGLYt            | L-alanylglycine transport via proton symport      | (BT_0580 or BT_4385 or BT_1086) | Transport, Extracellular         | Manually added gene annotation from databases |                                            | Genes added based on TransportDB (last consulted 06.06.12).                                                                                                                                                                                                                                                                                        |                  |
| ALAHISt            | L-alanyl-L-histidine transport via proton symport | (BT_0580 or BT_4385 or BT_1086) | Transport, Extracellular         | Manually added gene annotation from databases |                                            | Genes added based on TransportDB (last consulted 06.06.12).                                                                                                                                                                                                                                                                                        |                  |
| ALALEUt            | L-alanyl-L-leucine transport via proton symport   | (BT_0580 or BT_4385 or BT_1086) | Transport, Extracellular         | Manually added gene annotation from databases |                                            | Genes added based on TransportDB (last consulted 06.06.12).                                                                                                                                                                                                                                                                                        |                  |
| ALAR               | alanine racemase                                  | BT_4101                         | Alanine and Aspartate Metabolism | Manually added gene annotation from databases |                                            | Annotation from KEGG and NCBI Gene (last updated 01.01.11)                                                                                                                                                                                                                                                                                         | 5.1.1.1          |
| ALAt4r             | Alanine-Sodium symporter                          | BT_4476                         | Transport, Extracellular         | Manually added gene annotation from databases |                                            | Annotation from TransportDB (www.membranetransport.org).                                                                                                                                                                                                                                                                                           |                  |
| ALATHRt            | L-alanyl-L-threonine transport via proton symport | (BT_0580 or BT_4385 or BT_1086) | Transport, Extracellular         | Manually added gene annotation from databases |                                            | Genes added based on TransportDB (last consulted 06.06.12).                                                                                                                                                                                                                                                                                        |                  |
| ALR2               | aldose reductase (methylglyoxal)                  |                                 | Central Metabolism               | Evidence from literature                      | PMID:18848625, PMID:8370454, PMID:11260473 | No GPR is known. The reaction is putatively added to reconcile the results by PMID:18848625, which suggest the presence of a second pathway for 1,2-propanediol formation in <i>B. thetaiotaomicron</i> . Also based on pathways described by PMID:8370454. There is evidence for acetol production in <i>B. thetaiotaomicron</i> (PMID:11260473). | 1.1.1.21         |
| ALR4x              | aldose reductase (acetol)                         | (BT_3617 or BT_4424)            | Glycerophospholipid Metabolism   | Evidence from literature                      | PMID:18848625, PMID:8370454                | The reaction is carried out by sorbitol dehydrogenase. Added to reconcile the results by PMID:18848625, which suggest the presence of a second pathway for 1,2-propanediol formation in <i>B. thetaiotaomicron</i> . Also based on pathways described by PMID:8370454.                                                                             |                  |

| <b>BIGG Rxn ID</b> | <b>Function</b>                                                             | <b>GPR</b>                                                                                                                                                                                                                                                                                                                  | <b>Subsystem</b>                           | <b>Reason for addition</b> | <b>Reference</b>               | <b>Notes</b>                                                                                                                                                                                                                                                                    | <b>EC Number</b> |
|--------------------|-----------------------------------------------------------------------------|-----------------------------------------------------------------------------------------------------------------------------------------------------------------------------------------------------------------------------------------------------------------------------------------------------------------------------|--------------------------------------------|----------------------------|--------------------------------|---------------------------------------------------------------------------------------------------------------------------------------------------------------------------------------------------------------------------------------------------------------------------------|------------------|
| AMANNANASEe        | Alpha-mannan degradation, extracellular                                     | ((BT_3990 or BT_2629 or BT_2199 or BT_3784 or BT_3962 or BT_4092) and (BT_3991 or BT_3858 or BT_1769 or BT_1878 or BT_3130 or BT_3773) and (BT_3994 or BT_3792 or BT_2623 or BT_2949 or BT_3501 or BT_1883 or BT_3524 or BT_3301 or BT_3521) and ((BT_2625 and BT_2626) or (BT_3788 and BT_3789) or (BT_3854 and BT_3855))) | N-Glycan Degradation                       | Evidence from literature   | PMID: 22205877, PMID: 20081828 | B. thetaiotaomicron grows on yeast alpha-mannan. The enzymes carrying out the reaction are assumed to be secreted. The reaction involves cleaving of alpha-1,2, -1,3 and -1,6 bonds. Several susC and susD are upregulated during growth on alpha-mannan (included in the GPR). |                  |
| AMMQLT8            | S-adenosylmethione:2-demethylmenaquinole methyltransferase (menaquinone 8)  | (BT_0853 or BT_4216)                                                                                                                                                                                                                                                                                                        | Cofactor and Prosthetic Group Biosynthesis | Evidence from literature   | PMID:6102980                   | <i>B. thetaiotaomicron</i> produces menaquinone 8.                                                                                                                                                                                                                              | 2.1.1.-          |
| AMMQT10            | S-adenosylmethione:2-demethylmenaquinone methyltransferase (menaquinone 10) | (BT_0853 or BT_4216)                                                                                                                                                                                                                                                                                                        | Cofactor and Prosthetic Group Biosynthesis | Evidence from literature   | PMID:6102980                   | <i>B. thetaiotaomicron</i> produces menaquinone 7,8,9,10 and 11. MK-10 and MK-11 are the main components. Reaction is not charge balanced. Needs to be fixed. AH                                                                                                                |                  |
| AMMQT11            | S-adenosylmethione:2-demethylmenaquinone methyltransferase (menaquinone 11) | (BT_0853 or BT_4216)                                                                                                                                                                                                                                                                                                        | Cofactor and Prosthetic Group Biosynthesis | Evidence from literature   | PMID:6102980                   | <i>B. thetaiotaomicron</i> produces menaquinone 7,8,9,10 and 11. MK-10 and MK-11 are the main components. Reaction is not charge balanced. Needs to be fixed. AH                                                                                                                | 2.7.7.38         |

| <b>BIGG Rxn ID</b> | <b>Function</b>                                                            | <b>GPR</b>                                                                                                    | <b>Subsystem</b>                           | <b>Reason for addition</b>                    | <b>Reference</b>                                                        | <b>Notes</b>                                                                                                                                              | <b>EC Number</b> |
|--------------------|----------------------------------------------------------------------------|---------------------------------------------------------------------------------------------------------------|--------------------------------------------|-----------------------------------------------|-------------------------------------------------------------------------|-----------------------------------------------------------------------------------------------------------------------------------------------------------|------------------|
| AMMQT7             | S-adenosylmethione:2-demethylmenaquinone methyltransferase (menaquinone 7) | (BT_0853 or BT_4216)                                                                                          | Cofactor and Prosthetic Group Biosynthesis | Evidence from literature                      | PMID:6102980                                                            | B. thetaiotaomicron produces menaquinone 7,8,9,10 and 11. MK-10 and MK-11 are the main components. Reaction is not charge balanced. Needs to be fixed. AH | 3.2.1.65         |
| AMMQT9             | S-adenosylmethione:2-demethylmenaquinone methyltransferase (menaquinone 9) | (BT_0853 or BT_4216)                                                                                          | Cofactor and Prosthetic Group Biosynthesis | Evidence from literature                      | PMID:6102980                                                            | B. thetaiotaomicron produces menaquinone 7,8,9,10 and 11. MK-10 and MK-11 are the main components. Reaction is not charge balanced. Needs to be fixed. AH | 3.2.1.65         |
| AMPTASEPG          | aminopeptidase (pro-gly)                                                   | (BT_3464 or BT_3926 or BT_3996 or BT_0149 or BT_4193 or BT_3254 or BT_1260 or BT_1261 or BT_1314)             | Peptide Degradation                        | Manually added gene annotation from databases |                                                                         |                                                                                                                                                           |                  |
| AMPTASEPGe         | hydrolysis of Prolylglycine by predicted non-cytosolic proline peptidase   | BT_0587                                                                                                       | Peptide Degradation                        | Evidence from literature                      | PMID:12663928                                                           | Predicted non-cytosolic in PMID:12663928. Assumed to be extracellular for modeling purposes.                                                              | 3.4.13.9         |
| AMY1e              | alpha-amylase, extracellular (strch1 -> strch2)                            | ((BT_3698 and BT_3701 and BT_3702) or (BT_0773 and BT_3701 and BT_3702) or (BT_4305 and BT_3701 and BT_3702)) | Plant Polysaccharide Degradation           | Evidence from literature                      | PMID:10986238, PMID:2722747, PMID:8955399, PMID:18981178, PMID:18611383 | Starch utilization by B. thetaiotaomicron as sole carbon source is well established.                                                                      | 3.2.1.1          |
| AMYe               | starch hydrolysis by alpha-1,4-amylase and alpha-1,6 pullulanase           | ((BT_3698 and BT_3701 and BT_3702) or (BT_0773 and BT_3701 and BT_3702) or (BT_4305 and BT_3701 and BT_3702)) | Plant Polysaccharide Degradation           | Evidence from literature                      | PMID:10986238, PMID:2722747, PMID:8955399, PMID:18981178, PMID:18611383 | Starch utilization by B. thetaiotaomicron as sole carbon source is well established.                                                                      | 3.2.1.1          |

| BIGG Rxn ID  | Function                                       | GPR                                                                                                                                                                                                                                                                | Subsystem                        | Reason for addition      | Reference                                                               | Notes                                                                                                                                                                                                                                                            | EC Number |
|--------------|------------------------------------------------|--------------------------------------------------------------------------------------------------------------------------------------------------------------------------------------------------------------------------------------------------------------------|----------------------------------|--------------------------|-------------------------------------------------------------------------|------------------------------------------------------------------------------------------------------------------------------------------------------------------------------------------------------------------------------------------------------------------|-----------|
| AMYLE        | amylose hydrolysis by alpha-1,4-amylase        | ((BT_3698 and BT_3701 and BT_3702) or (BT_0773 and BT_3701 and BT_3702) or (BT_4305 and BT_3701 and BT_3702))                                                                                                                                                      | Plant Polysaccharide Degradation | Evidence from literature | PMID:10986238, PMID:2722747, PMID:8955399, PMID:18981178, PMID:18611383 | Starch utilization by B. thetaiotaomicron as sole carbon source is well established.                                                                                                                                                                             | 3.2.1.1   |
| AOXSr2       | 8-amino-7-oxononanoate synthase (pimeloyl-ACP) | (BT_0870 or BT_1443)                                                                                                                                                                                                                                               | Biotin Metabolism                | Evidence from literature | PMID:20693992                                                           | This enzyme is generally believed to utilize pimeloyl-CoA. Use of pimeloyl-ACP was recently shown.                                                                                                                                                               | 2.3.1.47  |
| ARABASE3e    | arabinotriose arabinosidase                    | (BT_0348 or BT_3096 or BT_3657)                                                                                                                                                                                                                                    | Plant Polysaccharide Degradation | Evidence from literature | PMID: 21339299                                                          | Takes place in periplasm. Extracellular for modelling purposes.                                                                                                                                                                                                  | 3.2.1.55  |
| ARABINANASEe | Arabinan degradation, extracellular            | ((BT_0360 or BT_0367 or BT_0368 or BT_0369) and (BT_4152 or BT_4667 or BT_4668) and (BT_4153 or BT_4170) and (BT_4175 or BT_4176) and ((BT_0361 and BT_0362) or (BT_4164 and BT_4165) or (BT_0363 and BT_0364) or (BT_4670 and BT_4671) or (BT_3680 and BT_3681))) | Plant Polysaccharide Degradation | Evidence from literature | PMID: 22205877, PMID: 21339299                                          | B. thetaiotaomicron grows on arabinan. BT_0360, BT_0367 and BT_0369 are active against sugar beet arabinan. susC/ susD homologs and enzymes for galactose, galacturonate and L-rhamnose degradation (included in GPR) are upregulated during growth on arabinan. |           |

| <b>BIGG Rxn ID</b> | <b>Function</b>                                                                                                                 | <b>GPR</b>                                                                                                                                                                  | <b>Subsystem</b>                                   | <b>Reason for addition</b>                    | <b>Reference</b>                                                      | <b>Notes</b>                                                                                                                                                                                                                                                                                                                                                                                           | <b>EC Number</b> |
|--------------------|---------------------------------------------------------------------------------------------------------------------------------|-----------------------------------------------------------------------------------------------------------------------------------------------------------------------------|----------------------------------------------------|-----------------------------------------------|-----------------------------------------------------------------------|--------------------------------------------------------------------------------------------------------------------------------------------------------------------------------------------------------------------------------------------------------------------------------------------------------------------------------------------------------------------------------------------------------|------------------|
| ARABINO GALASEe    | Arabinogalactan degradation by beta-galactosidase, endo-arabinofuranosidase and beta-glucuronidase, extracellular/periplasmatic | ((BT_0348 or BT_0265 or BT_3675 or BT_3685) and BT_0290 and BT_3687 and ((BT_3045 and BT_3046) or (BT_0268 and BT_0269) or (BT_0272 and BT_0273) or (BT_3680 and BT_3681))) | Plant Polysaccharide Degradation                   | Evidence from literature                      | PMID:848954, PMID:7251978, PMID:16887514 PMID:10820072, PMID:22205877 | B. thetaiotaomicron degrades larch arabinogalactan, which consists of galactose/arabinose (6:1) and small amounts of glucuronic acid. Larch AG is likely degraded via beta-galactosidase, Arabinan endo-1,5-alpha-L-arabinosidase (EC 3.2.1.99) and Alpha-N-arabinofuranosidase (EC 3.2.1.55) and involves susC/ susD. The genes included in the GPR are upregulated during growth on arabinogalactan. |                  |
| ARGabc             | L-arginine transport via ABC system                                                                                             | BT_4049                                                                                                                                                                     | Transport, Extracellular                           | Manually added gene annotation from databases |                                                                       | Annotation from NCBI Gene (last updated 01.01.11)                                                                                                                                                                                                                                                                                                                                                      |                  |
| ARGARG1c           | Hydrolysis of L-argininyl-L-arginine                                                                                            | BT_1846                                                                                                                                                                     | Peptide Degradation                                | Evidence from literature                      | PMID: 22628297                                                        | B. thetaiotaomicron peptidase M49 was characterized and shown to hydrolyze Arg-Arg and Phe-Arg specifically.                                                                                                                                                                                                                                                                                           | 1.1.3.9          |
| ARGARGt            | L-argininyl-L-arginine transport via proton symport                                                                             | (BT_0580 or BT_4385 or BT_1086)                                                                                                                                             | Transport, Extracellular                           | Evidence from literature                      | PMID: 22628297                                                        | B. thetaiotaomicron peptidase M49 was characterized and shown to hydrolyze Arg-Arg and Phe-Arg specifically.                                                                                                                                                                                                                                                                                           | 3.2.1.31         |
| AROH               | L-Arogenate hydro-lyase                                                                                                         | BT_3936                                                                                                                                                                     | Tyrosine, Tryptophan, and Phenylalanine Metabolism | Manually added gene annotation from databases |                                                                       | Added based on KEGG Pathway                                                                                                                                                                                                                                                                                                                                                                            | 4.2.1.51         |
| AS3TASE_HS1        | N-acetylglucosamine-3-sulfatase, heparin degradation                                                                            |                                                                                                                                                                             | Glycosaminoglycan Degradation                      | Evidence from literature                      | PMID:19801541, PMID:7574611                                           | <i>B. thetaiotaomicron</i> specific putative heparin sulfate degradation pathway. It is unknown which sulfatase catalyzes this reaction.                                                                                                                                                                                                                                                               | 3.1.6.14         |
| AS3TASE_HS2        | N-acetylglucosamine-3-sulfatase, heparin degradation                                                                            |                                                                                                                                                                             | Glycosaminoglycan Degradation                      | Evidence from literature                      | PMID:19801541, PMID:7574611                                           | <i>B. thetaiotaomicron</i> specific putative heparin sulfate degradation pathway. It is unknown which sulfatase catalyzes this reaction.                                                                                                                                                                                                                                                               | 3.1.6.14         |
| AS6TASE_HS1        | N-acetylglucosamine-6-sulfatase, heparin degradation                                                                            | (BT_4656 and BT_0238)                                                                                                                                                       | Glycosaminoglycan Degradation                      | Evidence from literature                      | PMID:19801541, PMID:7574611, PMID:21507958                            | <i>B. thetaiotaomicron</i> specific putative heparin sulfate degradation pathway. Requires sulfatase-maturing enzyme (BT_0238) to be functional.                                                                                                                                                                                                                                                       | 3.1.6.14         |

| BIGG Rxn ID | Function                                             | GPR                                                   | Subsystem                                  | Reason for addition                        | Reference                                                                                                                | Notes                                                                                                                                                                                                                      | EC Number |
|-------------|------------------------------------------------------|-------------------------------------------------------|--------------------------------------------|--------------------------------------------|--------------------------------------------------------------------------------------------------------------------------|----------------------------------------------------------------------------------------------------------------------------------------------------------------------------------------------------------------------------|-----------|
| AS6TASE_HS2 | N-acetylglucosamine-6-sulfatase, heparin degradation | (BT_4656 and BT_0238)                                 | Glycosaminoglycan Degradation              | Evidence from literature                   | PMID:19801541, PMID:7574611, PMID:21507958                                                                               | <i>B. thetaiotaomicron</i> specific putative heparin sulfate degradation pathway. Requires sulfatase-maturing enzyme (BT_0238) to be functional.                                                                           | 3.1.6.14  |
| ASNt2r      | L-asparagine reversible transport via proton symport |                                                       | Transport, Extracellular                   | Evidence from literature                   | Dworkin, M. and S. Falkow (2006). The prokaryotes : a handbook on the biology of bacteria. New York ; [London], Springer | <i>B. thetaiotaomicron</i> is weakly proteolytic, so a transport reaction for all amino acids is assumed.                                                                                                                  |           |
| ASPO5       | L-aspartate oxidase                                  | BT_3184                                               | Cofactor and Prosthetic Group Biosynthesis | Evidence from literature                   | PMID:11863440                                                                                                            | O2 can be replaced by fumarate as electron acceptor, yielding succinate. The ability of the enzyme to use both O2 and fumarate in cofactor reoxidation enables it to function under both aerobic and anaerobic conditions. | 1.4.3.16  |
| ASPt2r      | L-aspartate reversible transport via proton symport  |                                                       | Transport, Extracellular                   | Evidence from literature                   | Dworkin, M. and S. Falkow (2006). The prokaryotes : a handbook on the biology of bacteria. New York ; [London], Springer | <i>B. thetaiotaomicron</i> is weakly proteolytic, so a transport reaction for all amino acids is assumed.                                                                                                                  | 3.2.1.51  |
| ATPM        | ATP maintenance requirement                          |                                                       | Unassigned                                 | Based on existing metabolic reconstruction |                                                                                                                          | Added based on published reconstructions in BIGG database                                                                                                                                                                  |           |
| B_MANNASEe  | beta-mannosidase, extracellular                      | (BT_0458 or BT_2855 or BT_4074 or BT_2432 or BT_3599) | N-Glycan Degradation                       | Evidence from literature                   | PMID:17287210, PMID:18996345                                                                                             | BT_0458 gene product was purified and characterized. Shown to have beta-mannosidase activity on human N-glycans.                                                                                                           | 3.2.1.25  |
| BGLAe       | beta-glucosidase, extracellular                      | (BT_1780 or BT_1872 or BT_3567 or BT_2854 or BT_4714) | Alternate Carbon Metabolism                | Evidence from literature                   | PMID:879772                                                                                                              | Beta-glucosidase activity and cellobiose degradation was shown experimentally in <i>B. thetaiotaomicron</i> .                                                                                                              | 3.2.1.21  |
| BTNt2       | Biotin reversible transport via proton symport       |                                                       | Transport, Extracellular                   | Evidence from literature                   | PMID: 19748469                                                                                                           | <i>B. thetaiotaomicron</i> mutants in biotin biosynthesis are not essential in vitro on tryptone-yeast extract-glucose medium, suggesting that <i>B. thetaiotaomicron</i> can uptake biotin from yeast extract.            |           |

| BIGG Rxn ID | Function                                                                       | GPR                  | Subsystem                   | Reason for addition                           | Reference                                                                                          | Notes                                                                                                                                                                                                                                                                                                                                                                                                                                                                                                                                                                                                                                                                                           | EC Number |
|-------------|--------------------------------------------------------------------------------|----------------------|-----------------------------|-----------------------------------------------|----------------------------------------------------------------------------------------------------|-------------------------------------------------------------------------------------------------------------------------------------------------------------------------------------------------------------------------------------------------------------------------------------------------------------------------------------------------------------------------------------------------------------------------------------------------------------------------------------------------------------------------------------------------------------------------------------------------------------------------------------------------------------------------------------------------|-----------|
| CARNCnc     | hydrolysis of L-Carnosine for uptake                                           | (BT_4045 or BT_1615) | Histidine Metabolism        | Evidence from literature                      | PMID:3543210, PMID:12663928                                                                        | <i>B. thetaiotaomicron</i> is weakly proteolytic. Has a predicted cytosolic Nalpha-(beta-alanyl)-L-histidine hydrolase.                                                                                                                                                                                                                                                                                                                                                                                                                                                                                                                                                                         |           |
| CARPEPT1tr  | Reversible transport of L-Carnosine by Di <sup>-</sup> /tripeptide transporter | (BT_4385 or BT_0580) | Transport, Extracellular    | Evidence from literature                      | PMID:3543210, PMID:12663928                                                                        | <i>B. thetaiotaomicron</i> is weakly proteolytic. Has a predicted cytosolic Nalpha-(beta-alanyl)-L-histidine hydrolase.                                                                                                                                                                                                                                                                                                                                                                                                                                                                                                                                                                         |           |
| CA7r        | calcium / sodium antiporter (1:3), reversible                                  | BT_3019              | Transport, Extracellular    | Evidence from literature                      | PMID: 19748469                                                                                     | BT_2541 KO appears to be viable in vitro, which suggest that another calcium transporter exists.                                                                                                                                                                                                                                                                                                                                                                                                                                                                                                                                                                                                |           |
| CBL1abc     | Cob(1)alamin transport via ABC system                                          | (BT_1799 or BT_1489) | Transport, Extracellular    | Evidence from literature                      | PMID:4853401                                                                                       | <i>B. thetaiotaomicron</i> requires cobalamin (vitamin B12) for growth. Gene annotation is putatively based on NCBI Gene.                                                                                                                                                                                                                                                                                                                                                                                                                                                                                                                                                                       |           |
| CCP         | Cytochrome c peroxidase                                                        | BT_1606              | ROS Detoxification          | Manually added gene annotation from databases |                                                                                                    | Added based on annotation from NCBI Gene.                                                                                                                                                                                                                                                                                                                                                                                                                                                                                                                                                                                                                                                       | 1.11.1.5  |
| CDPGHL      | CDPglucose 4,6-hydro-lyase                                                     | BT_1350              | Alternate Carbon Metabolism | Manually added gene annotation from databases |                                                                                                    | Added based on KEGG Pathway. The products function and further metabolic fate seems to be unknown.                                                                                                                                                                                                                                                                                                                                                                                                                                                                                                                                                                                              | 4.2.1.45  |
| CELLBabc    | Cellobiose transport via ATP transporter                                       |                      | Transport, Extracellular    | Evidence from literature                      | PMID:869524, PMID:879772                                                                           | <i>B. thetaiotaomicron</i> can utilize cellobiose as carbon source.                                                                                                                                                                                                                                                                                                                                                                                                                                                                                                                                                                                                                             |           |
| CEPTC_BT    | choline phosphotransferase                                                     |                      | Sphingolipid Metabolism     | Evidence from literature                      | PMID:6102980, PMID:16887518, PMID:20855611, Anaerobe (2001) 07, 103–112 doi:10.1006/anae.2001.0376 | <i>Bacteroides</i> are well established to produce sphingolipids. Pathway added manually to BIGG database to represent known structural differences between eukaryotic and bacterial sphingolipids. The main sphingolipid types in <i>B. thetaiotaomicron</i> are ceramide-1-phosphoethanolamine and ceramide-1-phosphocholine. The fatty acid is usually branched. In <i>B. thetaiotaomicron</i> , the main FA is iso-branched C17. However, no homolog of human ceramide synthase was found in <i>Bacteroides</i> species. Either <i>Bacteroides</i> have structural homologs of this enzyme, which are not revealed by BLASTP search, or sphingolipids are synthesized by another mechanism. | 2.7.8.3   |

| BIGG Rxn ID | Function                                                      | GPR                  | Subsystem                | Reason for addition                           | Reference                                                                                             | Notes                                                                                                                                                                                                                                                                                                                                                                                                                                                                                                                                                                                                                                                                                           | EC Number |
|-------------|---------------------------------------------------------------|----------------------|--------------------------|-----------------------------------------------|-------------------------------------------------------------------------------------------------------|-------------------------------------------------------------------------------------------------------------------------------------------------------------------------------------------------------------------------------------------------------------------------------------------------------------------------------------------------------------------------------------------------------------------------------------------------------------------------------------------------------------------------------------------------------------------------------------------------------------------------------------------------------------------------------------------------|-----------|
| CEPTE_BT    | ethanolamine phosphotransferase (B.thetaiotaomicron specific) |                      | Sphingolipid Metabolism  | Evidence from literature                      | PMID:6102980, PMID:16887518, PMID:20855611, Anaerobe (2001) 07, 103–112<br>doi:10.1006/anae.2001.0376 | <i>Bacteroides</i> are well established to produce sphingolipids. Pathway added manually to BIGG database to represent known structural differences between eukaryotic and bacterial sphingolipids. The main sphingolipid types in <i>B. thetaiotaomicron</i> are ceramide-1-phosphoethanolamine and ceramide-1-phosphocholine. The fatty acid is usually branched. In <i>B. thetaiotaomicron</i> , the main FA is iso-branched C17. However, no homolog of human ceramide synthase was found in <i>Bacteroides</i> species. Either <i>Bacteroides</i> have structural homologs of this enzyme, which are not revealed by BLASTP search, or sphingolipids are synthesized by another mechanism. | 2.7.8.1   |
| CERS_BT     | Ceramide-1 synthase (B.thetaiotaomicron specific)             |                      | Sphingolipid Metabolism  | Evidence from literature                      | PMID:6102980, PMID:16887518, PMID:20855611, Anaerobe (2001) 07, 103–112<br>doi:10.1006/anae.2001.0376 | <i>Bacteroides</i> are well established to produce sphingolipids. Pathway added manually to BIGG database to represent known structural differences between eukaryotic and bacterial sphingolipids. The main sphingolipid types in <i>B. thetaiotaomicron</i> are ceramide-1-phosphoethanolamine and ceramide-1-phosphocholine. The fatty acid is usually branched. In <i>B. thetaiotaomicron</i> , the main FA is iso-branched C17. However, no homolog of human ceramide synthase was found in <i>Bacteroides</i> species. Either <i>Bacteroides</i> have structural homologs of this enzyme, which are not revealed by BLASTP search, or sphingolipids are synthesized by another mechanism. |           |
| CGLYt3_2_   | Cys-Gly transport in via proton symport                       | (BT_0580 or BT_4385) | Transport, Extracellular | Manually added gene annotation from databases |                                                                                                       | Genes added based on TransportDB (last consulted 19.07.11).                                                                                                                                                                                                                                                                                                                                                                                                                                                                                                                                                                                                                                     |           |

| BIGG Rxn ID | Function                                                              | GPR                                                                   | Subsystem                                  | Reason for addition                           | Reference                                                                                          | Notes                                                                                                                                                                                                                | EC Number |
|-------------|-----------------------------------------------------------------------|-----------------------------------------------------------------------|--------------------------------------------|-----------------------------------------------|----------------------------------------------------------------------------------------------------|----------------------------------------------------------------------------------------------------------------------------------------------------------------------------------------------------------------------|-----------|
| CHLPCTD     | choline phosphate cytididyltransferase                                | BT_1721                                                               | Sphingolipid Metabolism                    | Evidence from literature                      | PMID:6102980, PMID:16887518, PMID:20855611, Anaerobe (2001) 07, 103–112 doi:10.1006/anae.2001.0376 | May also be glucose-1-phosphate-cytidyltransferase (NCBI Gene, last updated 04.03.10). This reaction is needed for sphingolipid synthesis. Sphingolipids are known to be synthesized in <i>B. thetaiotaomicron</i> . |           |
| CHOLK       | Choline kinase                                                        |                                                                       | Sphingolipid Metabolism                    | Evidence from literature                      | PMID:6102980, PMID:16887518, PMID:20855611, Anaerobe (2001) 07, 103–112 doi:10.1006/anae.2001.0376 | No gene is known. Added to allow sphingolipid synthesis.                                                                                                                                                             | 2.7.1.32  |
| CITRAMALS   | citramalate synthase                                                  | BT_1858                                                               | Valine, Leucine, and Isoleucine Metabolism | Manually added gene annotation from databases |                                                                                                    | One of the enzymes involved in a novel pyruvate pathway for isoleucine biosynthesis that is found in some, mainly archaeal, bacteria (KEGG). It is also annotated in <i>B. thetaiotaomicron</i> 's genome.           | 2.3.1.182 |
| CKDNS       | CMP-3-deoxy-D-glycero-D-galacto-nonulosonic acid (CMP-KDN) synthetase | BT_1715                                                               | Capsular Polysaccharide Biosynthesis       | Evidence from literature                      | PMID:18804026                                                                                      | <i>B. thetaiotaomicron</i> forms and cytidylates 2-keto-3-deoxy-D-glycero-D-galacto-nononic acid (KDN), most likely for inclusion in its capsular polysaccharides.                                                   |           |
| CPS_BT_ABC  | Capsule polysaccharide ( <i>B. thetaiotaomicron</i> specific) export  | (BT_0057 and BT_0398 and BT_0481 and BT_0613 and BT_1356 and BT_2863) | Capsular Polysaccharide Biosynthesis       | Evidence from literature                      | PMID:17579514                                                                                      | Not sure if ABC transporter is correct. See comments for reaction CPSS_BT for more details on <i>B. thetaiotaomicron</i> CPS. Genes taken from Table S5 in PMID:17579514.                                            |           |

| BIGG Rxn ID | Function                                                         | GPR                                                                                                                                                                                | Subsystem                            | Reason for addition      | Reference                                                                               | Notes                                                                                                                                                                                                                                                                                                                                                                                                                                                                                                                                                                                                                                                                                                                                                                                              | EC Number |
|-------------|------------------------------------------------------------------|------------------------------------------------------------------------------------------------------------------------------------------------------------------------------------|--------------------------------------|--------------------------|-----------------------------------------------------------------------------------------|----------------------------------------------------------------------------------------------------------------------------------------------------------------------------------------------------------------------------------------------------------------------------------------------------------------------------------------------------------------------------------------------------------------------------------------------------------------------------------------------------------------------------------------------------------------------------------------------------------------------------------------------------------------------------------------------------------------------------------------------------------------------------------------------------|-----------|
| CPSS_BT     | Capsular polysaccharide synthesis (B. thetaiotaomicron specific) | (BT_0033 and BT_0378 and BT_0381 and BT_0382 and BT_0391 and BT_0394 and BT_0598 and BT_1343 and BT_1346 and BT_1355 and BT_1644 and BT_1653 and BT_1708 and BT_1722 and BT_2872 ) | Capsular Polysaccharide Biosynthesis | Evidence from literature | PMID:12904299, PMID:18804026, PMID:15774760, PMID:17579514, PMID:18263721 PMID:19403529 | Putative reaction and product formula, no information about exact reaction stoichiometry and structure of <i>B. thetaiotaomicron</i> CPS found. <i>B. thetaiotaomicron</i> most likely synthesizes 2-aminoethylphosphonate (PMID:12904299) and CMP-KDN (PMID:18804026) for inclusion into CPS. Annotation is based on Table S5 in PMID:17579514. Boolean rules may be incorrect. There are eight CPS biosynthesis loci in the <i>B. thetaiotaomicron</i> genome. dTDP-L-rhamnose is also generally involved in capsule polysaccharide synthesis. The capsules of gram-negative bacteria also include N-acetylmannosaminuronate (ManNAcA) (PMID:18263721). <i>Bacteroides</i> also incorporate GDP-fucose synthesized from host-derived fucose into their capsular polysaccharides (PMID:15774760). |           |
| CS4TASE     | chondro-4-sulfatase                                              | ((BT_0238 and BT_3095) or (BT_0238 and BT_3051) or (BT_0238 and BT_3177))                                                                                                          | Glycosaminoglycan Degradation        | Evidence from literature | PMID:21507958                                                                           | BT_0238 encodes anSME (anaerobic Sulfatase-Maturing Enzyme).                                                                                                                                                                                                                                                                                                                                                                                                                                                                                                                                                                                                                                                                                                                                       | 3.1.6.9   |
| CS4TASE2    | chondro-4-sulfatase                                              | ((BT_0238 and BT_3095) or (BT_0238 and BT_3051) or (BT_0238 and BT_3177))                                                                                                          | Glycosaminoglycan Degradation        | Evidence from literature | PMID:21507958                                                                           | BT_0238 encodes anSME (anaerobic Sulfatase-Maturing Enzyme).                                                                                                                                                                                                                                                                                                                                                                                                                                                                                                                                                                                                                                                                                                                                       | 3.1.6.9   |

| BIGG Rxn ID  | Function                            | GPR                                                                                                | Subsystem                     | Reason for addition      | Reference                                                               | Notes                                                                                                                                                                                                                                                                                                                                                                                                                                                                                | EC Number |
|--------------|-------------------------------------|----------------------------------------------------------------------------------------------------|-------------------------------|--------------------------|-------------------------------------------------------------------------|--------------------------------------------------------------------------------------------------------------------------------------------------------------------------------------------------------------------------------------------------------------------------------------------------------------------------------------------------------------------------------------------------------------------------------------------------------------------------------------|-----------|
| CS6TASE      | chondro-6-sulfatase                 | ((BT_0238 and BT_1622) or (BT_3057 and BT_0238) or (BT_4656 and BT_0238) or (BT_3486 and BT_0238)) | Glycosaminoglycan Degradation | Evidence from literature | PMID:21507958                                                           | BT_0238 encodes anSME (anaerobic Sulfatase-Maturing Enzyme).                                                                                                                                                                                                                                                                                                                                                                                                                         | 3.1.6.4   |
| CSABCASE_A_e | Chondroitin sulfate lyase ABC, CS_A | (BT_3331 and BT_3332 and BT_3348)                                                                  | Glycosaminoglycan Degradation | Evidence from literature | PMID:6782076, PMID:7574611, PMID:18512954, PMID:18992215, PMID:18996345 | <i>B. thetaiotaomicron</i> ferments chondroitin sulfate. The polysaccharide utilization locus (PUL) BT3324 - BT3350 is upregulated in its presence. BT_3348 degrades chondroitin sulfate to oligosaccharides, which requires BT_3331 (sus C homolog) and BT_3332 (csuF). BT_3324 and BT_3350 degrade the desulfated oligosaccharides to monosaccharides. Based on Figure 3, PMID:18996345. It is assumed that the proteoglycan rest is undegradable for <i>B. thetaiotaomicron</i> . | 4.2.2.20  |
| CSABCASE_B_e | Chondroitin sulfate lyase ABC, CS_B | (BT_3331 and BT_3332 and BT_3348)                                                                  | Glycosaminoglycan Degradation | Evidence from literature | PMID:6782076, PMID:7574611, PMID:18512954, PMID:18992215, PMID:18996345 | <i>B. thetaiotaomicron</i> ferments chondroitin sulfate. The polysaccharide utilization locus (PUL) BT3324 - BT3350 is upregulated in its presence. BT_3348 degrades chondroitin sulfate to oligosaccharides, which requires BT_3331 (sus C homolog) and BT_3332 (csuF). BT_3324 and BT_3350 degrade the desulfated oligosaccharides to monosaccharides. Based on Figure 3, PMID:18996345. It is assumed that the proteoglycan rest is undegradable for <i>B. thetaiotaomicron</i> . | 4.2.2.20  |

| BIGG Rxn ID  | Function                                           | GPR                               | Subsystem                              | Reason for addition      | Reference                                                               | Notes                                                                                                                                                                                                                                                                                                                                                                                                                                                                                | EC Number |
|--------------|----------------------------------------------------|-----------------------------------|----------------------------------------|--------------------------|-------------------------------------------------------------------------|--------------------------------------------------------------------------------------------------------------------------------------------------------------------------------------------------------------------------------------------------------------------------------------------------------------------------------------------------------------------------------------------------------------------------------------------------------------------------------------|-----------|
| CSABCASE_C_e | Chondroitin sulfate lyase ABC, CS_C                | (BT_3331 and BT_3332 and BT_3348) | Glycosaminoglycan Degradation          | Evidence from literature | PMID:6782076, PMID:7574611, PMID:18512954, PMID:18992215, PMID:18996345 | <i>B. thetaiotaomicron</i> ferments chondroitin sulfate. The polysaccharide utilization locus (PUL) BT3324 - BT3350 is upregulated in its presence. BT_3348 degrades chondroitin sulfate to oligosaccharides, which requires BT_3331 (sus C homolog) and BT_3332 (csuF). BT_3324 and BT_3350 degrade the desulfated oligosaccharides to monosaccharides. Based on Figure 3, PMID:18996345. It is assumed that the proteoglycan rest is undegradable for <i>B. thetaiotaomicron</i> . | 4.2.2.20  |
| CSPMDDC      | carboxyspermidine decarboxylase                    | BT_0674                           | Spermidine and Putrescine Biosynthesis | Evidence from literature | PMID:10801923                                                           | Annotation from NCBI Gene, last updated 02.04.11                                                                                                                                                                                                                                                                                                                                                                                                                                     | 4.1.1.-   |
| CSPMDDH      | carboxyspermidine:NAD P+ oxidoreductase            |                                   | Spermidine and Putrescine Biosynthesis | Evidence from literature | PMID:10801923                                                           | Added to allow <i>B. thetaiotaomicron</i> to secrete putrescine (shown in vivo). Annotated for <i>Bacteroides helcogenes</i> (Bache_1714).                                                                                                                                                                                                                                                                                                                                           | 4.1.1.-   |
| CYSDS        | Cysteine Desulhydrase                              | (BT_1923 or BT_2387)              | Cysteine Metabolism                    | Evidence from literature | PMID:4853401                                                            | Added to allow <i>B. thetaiotaomicron</i> to use cysteine as sulfur source.                                                                                                                                                                                                                                                                                                                                                                                                          | 4.1.99.1  |
| CYST2r       | L-cysteine reversible transport via proton symport |                                   | Transport, Extracellular               | Evidence from literature | PMID:4853401                                                            | Cysteine is required as sulfur source if sulfide is not available.                                                                                                                                                                                                                                                                                                                                                                                                                   |           |
| D_LACt2      | D-lactate transport via proton symport             |                                   | Transport, Extracellular               | Evidence from literature | PMID:438119, PMID:148460, PMID:12740060, PMID:11260473                  | <i>Bacteroides</i> produce lactate under certain circumstances.                                                                                                                                                                                                                                                                                                                                                                                                                      |           |
| DAGK160      | diacylglycerol kinase (n-C16:0)                    |                                   | Sphingolipid Metabolism                | Manual gapfilling        |                                                                         | Not sure if this enzyme is present. It is annotated for most <i>Bacteroides</i> species except <i>B. thetaiotaomicron</i> . Needed for degradation of diacylglycerol and sphingolipid synthesis.                                                                                                                                                                                                                                                                                     |           |

| BIGG Rxn ID | Function                                                                  | GPR                  | Subsystem                                  | Reason for addition                           | Reference     | Notes                                                                                                                                                                                                      | EC Number |
|-------------|---------------------------------------------------------------------------|----------------------|--------------------------------------------|-----------------------------------------------|---------------|------------------------------------------------------------------------------------------------------------------------------------------------------------------------------------------------------------|-----------|
| DALAt2r     | D-alanine transport via proton symport                                    |                      | Transport, Extracellular                   | Evidence from literature                      | PMID:12663928 | Added by Model SEED during auto-completion. No gene annotation for ala-D transport available, but <i>B. thetaiotaomicron</i> is believed to possess a non-cytosolic D-alanine-D-alanine dipeptidase.       |           |
| DEXTRAN40e  | alpha-dextrin endo-1,6-alpha-glucosidase/pullulanase                      | (BT_1663 or BT_4689) | Plant Polysaccharide Degradation           | Evidence from literature                      | PMID:848954   | Assumed to perform dextran (alpha-1,6-glucan) degradation. Maltose is the smallest sugar that it can release from an alpha-(1->6)-linkage (KEGG Enzyme). <i>B. thetaiotaomicron</i> ferments dextran.      | 3.2.1.41  |
| DGC3D       | 2-deoxy-D-gluconate 3-dehydrogenase                                       | (BT_3232 or BT_1015) | Pentose and Glucuronate Interconversions   | Manually added gene annotation from databases |               | Gene annotation was drawn from The SEED.                                                                                                                                                                   | 1.1.1.125 |
| DGC3D2      | 2-deoxy-D-gluconate 3-dehydrogenase                                       | (BT_3232 or BT_1015) | Pentose and Glucuronate Interconversions   | Manually added gene annotation from databases |               | Gene annotation was drawn from The SEED.                                                                                                                                                                   | 1.1.1.125 |
| DHNAOT10    | 1,4-dihydroxy-2-naphthoate octaprenyltransferase (demethylmenaquinone 10) |                      | Cofactor and Prosthetic Group Biosynthesis | Evidence from literature                      | PMID:6102980  | <i>B. thetaiotaomicron</i> produces menaquinone 7,8,9,10 and 11. MK-10 and MK-11 are the main components.Note: Reaction is unbalanced, but I don't know to fix this. KEGG doesn't have any information. AH | 3.2.1.65  |
| DHNAOT11    | 1,4-dihydroxy-2-naphthoate octaprenyltransferase (demethylmenaquinone 11) |                      | Cofactor and Prosthetic Group Biosynthesis | Evidence from literature                      | PMID:6102980  | <i>B. thetaiotaomicron</i> produces menaquinone 7,8,9,10 and 11. MK-10 and MK-11 are the main components.Note: Reaction is unbalanced, but I don't know to fix this. KEGG doesn't have any information. AH | 3.2.1.51  |
| DHNAOT7     | 1,4-dihydroxy-2-naphthoate octaprenyltransferase (demethylmenaquinone 7)  | (BT_2014 or BT_2015) | Cofactor and Prosthetic Group Biosynthesis | Evidence from literature                      | PMID:6102980  | <i>B. thetaiotaomicron</i> produces menaquinone 7,8,9,10 and 11. MK-10 and MK-11 are the main components.Note: Reaction is unbalanced, but I don't know to fix this. KEGG doesn't have any information. AH | 3.2.1.51  |

| <b>BIGG Rxn ID</b> | <b>Function</b>                                                                 | <b>GPR</b>                         | <b>Subsystem</b>                           | <b>Reason for addition</b>                     | <b>Reference</b>                            | <b>Notes</b>                                                                                                                                                                                                                             | <b>EC Number</b> |
|--------------------|---------------------------------------------------------------------------------|------------------------------------|--------------------------------------------|------------------------------------------------|---------------------------------------------|------------------------------------------------------------------------------------------------------------------------------------------------------------------------------------------------------------------------------------------|------------------|
| DHNAOT9            | 1,4-dihydroxy-2-naphthoate octaprenyltransferase (demethylmenaquinone 9)        | (BT_2014 or BT_2015)               | Cofactor and Prosthetic Group Biosynthesis | Evidence from literature                       | PMID:6102980                                | B. thetaiotaomicron produces menaquinone 7,8,9,10 and 11. MK-10 and MK-11 are the main components. Note: Reaction is unbalanced, but I don't know to fix this. KEGG doesn't have any information. AH                                     | 3.2.1.51         |
| DHORDfum           | Fumarate dependent DHORD                                                        | (BT_1009 or (BT_0891 and BT_0892)) | Purine and Pyrimidine Biosynthesis         | Curation of incorrect annotation in Model SEED |                                             | Gene was incorrectly annotated by Model SEED, correct: dihydroorotate dehydrogenase (fumarate)                                                                                                                                           | 1.3.98.1         |
| DHPS3              | 7,8 dihydropteroate synthase (methanopterin)                                    | BT_1410                            | Cofactor and Prosthetic Group Biosynthesis | Manually added gene annotation from databases  |                                             | Gene annotation was drawn from The SEED.                                                                                                                                                                                                 | 2.5.1.15         |
| DM_4HBA            | Sink needed to allow 4-hydroxy-benzoate to leave system                         |                                    | exchange/demand reaction                   | Manual gapfilling                              |                                             |                                                                                                                                                                                                                                          |                  |
| DM_5DRIB           | Sink needed to allow 5-deoxyribose to leave system                              |                                    | exchange/demand reaction                   | Manual gapfilling                              |                                             |                                                                                                                                                                                                                                          |                  |
| DM_AMOB            | Sink needed to allow S-Adenosyl-4-methylthio-2-oxobutanoate to leave the system |                                    | exchange/demand reaction                   | Manual gapfilling                              |                                             |                                                                                                                                                                                                                                          |                  |
| DT5HSUt2r          | 5-Dehydro-4-deoxy-D-glucuronate transport in via proton symport, reversible     | BT_4105                            | Transport, Extracellular                   | Evidence from literature                       | PMID:3968032                                | Added to allow complete degradation of pectin, not sure if this degradation product is generated in periplasm or cytosol. Degradation pathway may be slightly different. Added based on NCBI Gene (annotation: hexouronate transporter). |                  |
| EACPR1             | Enoyl-ACP-reductase (FabI)                                                      | BT_4188                            | Biotin Metabolism                          | Evidence from literature                       | PMID:20693992                               | Based on biotin synthesis described in PMID:20693992 for <i>E. coli</i>                                                                                                                                                                  |                  |
| EACPR2             | Enoyl-ACP-reductase (FabI)                                                      | BT_4188                            | Biotin Metabolism                          | Evidence from literature                       | PMID:20693992                               | Based on biotin synthesis described in PMID:20693992 for <i>E. coli</i>                                                                                                                                                                  |                  |
| EAR121x            | enoyl-[acyl-carrier-protein] reductase (NADH) (n-C12:1)                         | BT_4188                            | Cell Envelope Biosynthesis                 | Evidence from literature                       | PMID: 6102980, PMID: 7440508, PMID: 7204330 | The fatty acid composition of <i>B. thetaiotaomicron</i> was determined experimentally.                                                                                                                                                  | 1.3.1.9          |
| EAR141x            | enoyl-[acyl-carrier-protein] reductase (NADH) (n-C14:1)                         | BT_4188                            | Cell Envelope Biosynthesis                 | Evidence from literature                       | PMID: 6102980, PMID: 7440508, PMID: 7204330 | The fatty acid composition of <i>B. thetaiotaomicron</i> was determined experimentally.                                                                                                                                                  | 1.3.1.9          |

| BIGG Rxn ID | Function                                                | GPR                                                   | Subsystem                       | Reason for addition      | Reference                                   | Notes                                                                                                                                                                                                                                                                                                 | EC Number |
|-------------|---------------------------------------------------------|-------------------------------------------------------|---------------------------------|--------------------------|---------------------------------------------|-------------------------------------------------------------------------------------------------------------------------------------------------------------------------------------------------------------------------------------------------------------------------------------------------------|-----------|
| EAR161x     | enoyl-[acyl-carrier-protein] reductase (NADH) (n-C16:1) | BT_4188                                               | Cell Envelope Biosynthesis      | Evidence from literature | PMID: 6102980, PMID: 7440508, PMID: 7204330 | The fatty acid composition of <i>B. thetaiotaomicron</i> was determined experimentally.                                                                                                                                                                                                               | 1.3.1.9   |
| EAR181x     | enoyl-[acyl-carrier-protein] reductase (NADH) (n-C18:1) | BT_4188                                               | Cell Envelope Biosynthesis      | Evidence from literature | PMID: 6102980, PMID: 7440508, PMID: 7204330 | The fatty acid composition of <i>B. thetaiotaomicron</i> was determined experimentally.                                                                                                                                                                                                               | 1.3.1.9   |
| EDTXS1_BT   | Endotoxin Synthesis (lauroyl transferase)               | BT_2152                                               | Lipopolysaccharide Biosynthesis | Evidence from literature | PMID:18931137, PMID:19460428, PMID:20974832 | LPS biosynthesis partly based on reconstruction of the related microbe <i>P. gingivalis</i> (PMID:18931137). Based on structural information taken from (PMID:19460428, PMID:20974832). Could not find information, though, if laurate is really added to kdolipid IV in <i>B. thetaiotaomicron</i> . |           |
| EPGALURSe   | Endopolygalacturonase (extracellular)                   | (BT_1018 or BT_2378 or BT_4123 or BT_4155 or BT_4187) | Alternate Carbon Metabolism     | Evidence from literature | PMID:3968032                                | Purified and characterized by enzyme assay. Genome annotation from NCBI Gene. Appears to be located in periplasm (extracellular for modeling purposes).                                                                                                                                               | 3.2.1.15  |
| ETOHt       | ethanol reversible transport                            |                                                       | Transport, Extracellular        | Evidence from literature | PMID:438119, PMID:17563350                  | <i>Bacteroides</i> produce weak amounts of ethanol under certain circumstances.                                                                                                                                                                                                                       |           |
| FIPGT       | fucose-1-phosphate guanylyltransferase                  | BT_2128                                               | Alternate Carbon Metabolism     | Evidence from literature | PMID:15774760, PMID:19379697                | <i>Bacteroides</i> use host-derived fucose for cell surface decoration.                                                                                                                                                                                                                               | 2.7.7.30  |
| FCLK        | L-fuculokinase                                          | BT_1275                                               | Alternate Carbon Metabolism     | Evidence from literature | PMID:10449780                               | The L-fucose utilization operon was characterized experimentally.                                                                                                                                                                                                                                     |           |

| BIGG Rxn ID | Function                                   | GPR                   | Subsystem                                  | Reason for addition         | Reference                                       | Notes                                                                                                                                                                                                                                                                                                                                                                                                                                                                                                                                                                                                                                                                                                                                                                                     | EC Number |
|-------------|--------------------------------------------|-----------------------|--------------------------------------------|-----------------------------|-------------------------------------------------|-------------------------------------------------------------------------------------------------------------------------------------------------------------------------------------------------------------------------------------------------------------------------------------------------------------------------------------------------------------------------------------------------------------------------------------------------------------------------------------------------------------------------------------------------------------------------------------------------------------------------------------------------------------------------------------------------------------------------------------------------------------------------------------------|-----------|
| FDNADOX     | ferredoxin:NAD <sup>+</sup> oxidoreductase |                       | Unassigned                                 | Evidence from literature    | PMID:760499,<br>PMID:12740060,<br>PMID:20444704 | In the gut, this reaction allows primary fermenters, such as <i>B. thetaiotaomicron</i> , to regenerate NAD <sup>+</sup> . Also involves a ferredoxin-dependent hydrogenase (HYD4). The pathway only takes place if the end product hydrogen is removed from the environment because the equilibrium of the reaction favors the formation of NADH. <i>B. thetaiotaomicron</i> generates hydrogen as one of its fermentation end products; accumulation of hydrogen inhibits reoxidation of NADH. It is therefore assumed that it regenerates NAD <sup>+</sup> via this pathway, which leads to increased hydrogen partial pressure. Removal of hydrogen allows <i>B. thetaiotaomicron</i> to regenerate NAD <sup>+</sup> . No gene is known, reaction was added during manual gapfilling. | 1.18.1.3  |
| FK          | Fucokinase                                 | BT_2128               | Alternate Carbon Metabolism                | Evidence from literature    | PMID:15774760                                   | The pathway was demonstrated experimentally in <i>Bacteroides fragilis</i> .                                                                                                                                                                                                                                                                                                                                                                                                                                                                                                                                                                                                                                                                                                              | 2.7.1.52  |
| FOLR        | tetrahydrofolate NADP oxidoreductase       | (BT_0106 or BT_2048)  | Folate Metabolism                          | Evidence from literature    | PMID:4853401,<br>PMID:9167138                   | Added to allow folate biosynthesis. <i>B. thetaiotaomicron</i> does not require folate in medium.                                                                                                                                                                                                                                                                                                                                                                                                                                                                                                                                                                                                                                                                                         | 1.5.1.3   |
| FOMETR      | aminomethyltransferase                     | BT_4584               | Cofactor and Prosthetic Group Biosynthesis | Evidence from KEGG Database |                                                 | One of several reactions catalyzed by aminomethyltransferase (EC 2.1.2.10). Added based on KEGG Pathway.                                                                                                                                                                                                                                                                                                                                                                                                                                                                                                                                                                                                                                                                                  | 2.1.2.10  |
| FORt        | formate transport via diffusion            |                       | Transport, Extracellular                   | Evidence from literature    | PMID:9178362                                    | <i>B. thetaiotaomicron</i> produces formate under certain circumstances.                                                                                                                                                                                                                                                                                                                                                                                                                                                                                                                                                                                                                                                                                                                  |           |
| FRD10       | fumarate reductase                         | (BT_3054 and BT_3055) | TCA Cycle                                  | Evidence from literature    | PMID:12777495,<br>PMID:11260473                 | <i>Bacteroides</i> have both succinate dehydrogenase and fumarate reductase activity. Fumarate reductase is a key enzyme in central metabolism. AH                                                                                                                                                                                                                                                                                                                                                                                                                                                                                                                                                                                                                                        |           |

| <b>BIGG Rxn ID</b> | <b>Function</b>                                       | <b>GPR</b>                      | <b>Subsystem</b>                 | <b>Reason for addition</b> | <b>Reference</b>             | <b>Notes</b>                                                                                                                                | <b>EC Number</b> |
|--------------------|-------------------------------------------------------|---------------------------------|----------------------------------|----------------------------|------------------------------|---------------------------------------------------------------------------------------------------------------------------------------------|------------------|
| FRD11              | fumarate reductase                                    | (BT_3054 and BT_3055)           | TCA Cycle                        | Evidence from literature   | PMID:12777495, PMID:11260473 | Bacteroides have both succinate dehydrogenase and fumarate reductase activity. Fumarate reductase is a key enzyme in central metabolism. AH |                  |
| FRD8               | fumarate reductase                                    | (BT_3054 and BT_3055)           | TCA Cycle                        | Evidence from literature   | PMID:12777495, PMID:11260473 | Bacteroides have both succinate dehydrogenase and fumarate reductase activity. Fumarate reductase is a key enzyme in central metabolism. AH |                  |
| FRD9               | fumarate reductase                                    | (BT_3054 and BT_3055)           | TCA Cycle                        | Evidence from literature   | PMID:12777495, PMID:11260473 | Bacteroides have both succinate dehydrogenase and fumarate reductase activity. Fumarate reductase is a key enzyme in central metabolism. AH |                  |
| FRUASE3            | Intracellular endofructanase                          | BT_1765                         | Plant Polysaccharide Degradation | Evidence from literature   | PMID:20603004                | Intracellular fructanase activity was demonstrated in <i>B. thetaiotaomicron</i> .                                                          | 3.2.1.65         |
| FRUt2r             | D-fructose transport in via proton symport reversible | BT_1758                         | Transport, Extracellular         | Evidence from literature   | PMID: 20603004               | <i>B. thetaiotaomicron</i> grows on D-fructose.                                                                                             |                  |
| FUCASEe            | alpha-fucosidase, extracellular                       | (BT_1842 or BT_2970 or BT_3665) | N-Glycan Degradation             | Evidence from literature   | PMID:15774760, PMID:19379697 | <i>Bacteroides</i> use host-derived fucose for cell surface decoration.                                                                     | 3.2.1.51         |

| <b>BIGG Rxn ID</b> | <b>Function</b>                                                                                                                                 | <b>GPR</b>                                                                                                                                                                                                                                                                                                                                                                                                                  | <b>Subsystem</b>         | <b>Reason for addition</b>                    | <b>Reference</b>                  | <b>Notes</b>                                                                                                                                                                                                                                                                                                                                                                                                           | <b>EC Number</b> |
|--------------------|-------------------------------------------------------------------------------------------------------------------------------------------------|-----------------------------------------------------------------------------------------------------------------------------------------------------------------------------------------------------------------------------------------------------------------------------------------------------------------------------------------------------------------------------------------------------------------------------|--------------------------|-----------------------------------------------|-----------------------------------|------------------------------------------------------------------------------------------------------------------------------------------------------------------------------------------------------------------------------------------------------------------------------------------------------------------------------------------------------------------------------------------------------------------------|------------------|
| FUCNEULACNHX_DEGe  | monofucosyl-monosialyl-lacto-N-hexaose degradation by alpha-fucosidase, sialidase, N-acetylglutaminidase and beta-galactosidase (extracellular) | ((BT_1625 or BT_4136) and (BT_0455 or BT_2194 or BT_2892) and (BT_1626 or BT_0461) and (BT_1627 or BT_1632 or BT_4132 or BT_0459 or BT_0460 or BT_1038 or BT_1044 or BT_1048 or BT_1051 or BT_4295 or BT_2825) and ((BT_1630 and BT_1631) or (BT_4134 and BT_4135) or (BT_1039 and BT_1040) or (BT_1042 and BT_1043) or (BT_1046 and BT_1047) or (BT_4297 and BT_4298) or (BT_2818 and BT_2819) or (BT_2820 and BT_2821)))) | HMO Degradation          | Evidence from literature                      | PMID: 22036470.<br>PMID: 20679197 | B. thetaiotaomicron grows on human milk oligosaccharides (HMOs); numerous glycosidase hydrolases are upregulated during growth on HMOs. Lacto-N-tetraose and Lacto-N-neotetraose are poorly metabolized and accumulate if BT is grown on HMOs. Putative reaction. Structure based on PMID: 20679197. Involves beta-galactosidase, alpha-fucosidase, sialidase, N-acetylglucosaminidase, susC, susD (binding proteins). |                  |
| FUCt               | L-fucose transport via proton symport                                                                                                           | (BT_1277 or BT_3616)                                                                                                                                                                                                                                                                                                                                                                                                        | Transport, Extracellular | Evidence from literature                      | PMID:10449780                     | <i>B. thetaiotaomicron</i> can use L-fucose as carbon source.                                                                                                                                                                                                                                                                                                                                                          |                  |
| FUMt2r             | fumarate reversible transport via symport                                                                                                       | BT_2756                                                                                                                                                                                                                                                                                                                                                                                                                     | Transport, Extracellular | Manually added gene annotation from databases |                                   | Annotation from NCBI Gene.                                                                                                                                                                                                                                                                                                                                                                                             |                  |

| BIGG Rxn ID | Function                                                    | GPR     | Subsystem                      | Reason for addition      | Reference                                   | Notes                                                                                                                                                                                                                                           | EC Number |
|-------------|-------------------------------------------------------------|---------|--------------------------------|--------------------------|---------------------------------------------|-------------------------------------------------------------------------------------------------------------------------------------------------------------------------------------------------------------------------------------------------|-----------|
| G1PACT      | glucosamine-1-phosphate N-acetyltransferase                 |         | Cell Envelope Biosynthesis     | Manual gapfilling        |                                             | This enzyme was added to allow synthesis of N-acetylglucosamine from glucose . This role might also be fulfilled by glucosamine-6-phosphate-acetyltransferase (EC 2.3.1.4), it is unclear which pathway is used by <i>B. thetaiotaomicron</i> . | 2.3.1.157 |
| G3PAT120    | glycerol-3-phosphate acyltransferase (C12:0)                |         | Glycerophospholipid Metabolism | Evidence from literature | PMID: 6102980, PMID: 7440508, PMID: 7204330 | Added during manual gapfilling to allow lipid biosynthesis to take place. GPR is unknown.                                                                                                                                                       | 2.3.1.15  |
| G3PAT140    | glycerol-3-phosphate acyltransferase (C14:0)                |         | Glycerophospholipid Metabolism | Evidence from literature | PMID: 6102980, PMID: 7440508, PMID: 7204330 | Added during manual gapfilling to allow lipid biosynthesis to take place. GPR is unknown.                                                                                                                                                       | 2.3.1.15  |
| G3PAT160    | glycerol-3-phosphate acyltransferase (C16:0)                |         | Glycerophospholipid Metabolism | Evidence from literature | PMID: 6102980, PMID: 7440508, PMID: 7204330 | Added during manual gapfilling to allow lipid biosynthesis to take place. GPR is unknown.                                                                                                                                                       | 2.3.1.15  |
| G3PAT181    | glycerol-3-phosphate acyltransferase (C18:1)                |         | Glycerophospholipid Metabolism | Evidence from literature | PMID: 6102980, PMID: 7440508, PMID: 7204330 | Added during manual gapfilling to allow lipid biosynthesis to take place. GPR is unknown.                                                                                                                                                       | 2.3.1.15  |
| G3PAT115    | anteisopentadecanoyl-glycerol-3-phosphate O-acyltransferase |         | Glycerophospholipid Metabolism | Evidence from literature | PMID: 6102980, PMID: 7440508, PMID: 7204330 | Added during manual gapfilling to allow lipid biosynthesis to take place. GPR is unknown.                                                                                                                                                       | 2.3.1.15  |
| G3PAT114    | isotetradecanoyl-glycerol-3-phosphate O-acyltransferase     |         | Glycerophospholipid Metabolism | Evidence from literature | PMID: 6102980, PMID: 7440508, PMID: 7204330 | Added during manual gapfilling to allow lipid biosynthesis to take place. GPR is unknown.                                                                                                                                                       | 2.3.1.15  |
| G3PAT115    | isopentadecanoyl-glycerol-3-phosphate O-acyltransferase     |         | Glycerophospholipid Metabolism | Evidence from literature | PMID: 6102980, PMID: 7440508, PMID: 7204330 | Added during manual gapfilling to allow lipid biosynthesis to take place. GPR is unknown.                                                                                                                                                       | 2.3.1.15  |
| G3PAT116    | isohexadecanoyl-glycerol-3-phosphate O-acyltransferase      |         | Glycerophospholipid Metabolism | Evidence from literature | PMID: 6102980, PMID: 7440508, PMID: 7204330 | Added during manual gapfilling to allow lipid biosynthesis to take place. GPR is unknown.                                                                                                                                                       | 2.3.1.15  |
| GACPCD      | Glutaryl-ACP condensation catalyzed by FabB or FabF         | BT_3358 | Biotin Metabolism              | Evidence from literature | PMID:20693992                               | Based on biotin synthesis described in PMID:20693992 for <i>E. coli</i> . The authors are unsure if this reaction is carried out by FabB or FabF. Here, FabF is assumed to carry out the reaction.                                              |           |
| GALAM6PDA   | Galactosamine-6-phosphate deaminase                         |         | Aminosugar Metabolism          | Evidence from literature | PMID:2845859                                | <i>B. thetaiotaomicron</i> grows on N-acetylgalactosamine: PMID:2845859. However, the utilization pathway is poorly understood.                                                                                                                 |           |

| <b>BIGG Rxn ID</b> | <b>Function</b>                                         | <b>GPR</b>                                                                                                                                                                                                                                                                                              | <b>Subsystem</b>              | <b>Reason for addition</b> | <b>Reference</b>                             | <b>Notes</b>                                                                                                                                                                                                                                                         | <b>EC Number</b> |
|--------------------|---------------------------------------------------------|---------------------------------------------------------------------------------------------------------------------------------------------------------------------------------------------------------------------------------------------------------------------------------------------------------|-------------------------------|----------------------------|----------------------------------------------|----------------------------------------------------------------------------------------------------------------------------------------------------------------------------------------------------------------------------------------------------------------------|------------------|
| GALAMt2r           | galactosamine transport (proton symport)                |                                                                                                                                                                                                                                                                                                         | Transport, Extracellular      | Evidence from literature   | PMID: 6367911                                | B. thetaiotaomicron metabolizes galactosamine to some extent (though the compound does not support growth in vivo).                                                                                                                                                  |                  |
|                    |                                                         | (BT_0290 or BT_0461 or BT_0757 or BT_0983 or BT_0992 or BT_0993 or BT_0996 or BT_1626 or BT_2190 or BT_2680 or BT_2922 or BT_2969 or BT_3092 or BT_3114 or BT_3179 or BT_3293 or BT_3340 or BT_3513 or BT_3654 or BT_4050 or BT_4152 or BT_4156 or BT_4160 or BT_4181 or BT_4241 or BT_4667 or BT_4684) |                               |                            |                                              |                                                                                                                                                                                                                                                                      |                  |
| GALASE_HSe         | Extracellular beta-galactosidase, heparin degradation   |                                                                                                                                                                                                                                                                                                         | Glycosaminoglycan Degradation | Evidence from literature   | PMID:19801541, PMID:7574611                  | <i>B. thetaiotaomicron</i> specific putative heparin sulfate degradation pathway.                                                                                                                                                                                    | 3.2.1.23         |
| GALASE_OGLYCAN1e   | Beta-galactosidase, mucin-type O-glycans, extracellular | BT_4241 and BT_4246 and BT_4247                                                                                                                                                                                                                                                                         | O-Glycan Degradation          | Evidence from literature   | PMID: 18996345, PMID: 10430883, PMID: 848954 | B. thetaiotaomicron is well known to degrade mucin, the genes included in the GPR are upregulated during growth on mucin. The subsystem "O-Glycan Biosynthesis" in Recon1 represents mucin biosynthesis. Involves beta-galactosidase, susC, susD (binding proteins). |                  |

| <b>BIGG Rxn ID</b> | <b>Function</b>                                         | <b>GPR</b>                                                                                                                                                                                                                                                                                              | <b>Subsystem</b>     | <b>Reason for addition</b> | <b>Reference</b>                             | <b>Notes</b>                                                                                                                                                                                                                                                         | <b>EC Number</b> |
|--------------------|---------------------------------------------------------|---------------------------------------------------------------------------------------------------------------------------------------------------------------------------------------------------------------------------------------------------------------------------------------------------------|----------------------|----------------------------|----------------------------------------------|----------------------------------------------------------------------------------------------------------------------------------------------------------------------------------------------------------------------------------------------------------------------|------------------|
| GALASE_OGLYCAN2e   | Beta-galactosidase, mucin-type O-glycans, extracellular | BT_4241 and BT_4246 and BT_4247                                                                                                                                                                                                                                                                         | O-Glycan Degradation | Evidence from literature   | PMID: 18996345, PMID: 10430883, PMID: 848954 | B. thetaiotaomicron is well known to degrade mucin, the genes included in the GPR are upregulated during growth on mucin. The subsystem "O-Glycan Biosynthesis" in Recon1 represents mucin biosynthesis. Involves beta-galactosidase, susC, susD (binding proteins). |                  |
| GALASE_OGLYCAN3e   | Beta-galactosidase, mucin-type O-glycans, extracellular | BT_4241 and BT_4246 and BT_4247                                                                                                                                                                                                                                                                         | O-Glycan Degradation | Evidence from literature   | PMID: 18996345, PMID: 10430883, PMID: 848954 | B. thetaiotaomicron is well known to degrade mucin, the genes included in the GPR are upregulated during growth on mucin. The subsystem "O-Glycan Biosynthesis" in Recon1 represents mucin biosynthesis. Involves beta-galactosidase, susC, susD (binding proteins). |                  |
| GALASE1e           | beta-galactosidase, extracellular                       | (BT_0290 or BT_0461 or BT_0757 or BT_0983 or BT_0992 or BT_0993 or BT_0996 or BT_1626 or BT_2190 or BT_2680 or BT_2922 or BT_2969 or BT_3092 or BT_3114 or BT_3179 or BT_3293 or BT_3340 or BT_3513 or BT_3654 or BT_4050 or BT_4152 or BT_4156 or BT_4160 or BT_4181 or BT_4241 or BT_4667 or BT_4684) | N-Glycan Degradation | Evidence from literature   | PMID:16968696, PMID:17132046                 | <i>B. thetaiotaomicron</i> ferments host-derived N-glycans.                                                                                                                                                                                                          | 3.2.1.23         |

| <b>BIGG Rxn ID</b>  | <b>Function</b>                                               | <b>GPR</b>                                       | <b>Subsystem</b>              | <b>Reason for addition</b> | <b>Reference</b>                                             | <b>Notes</b>                                                                                                                                                                                                                                                    | <b>EC Number</b>       |
|---------------------|---------------------------------------------------------------|--------------------------------------------------|-------------------------------|----------------------------|--------------------------------------------------------------|-----------------------------------------------------------------------------------------------------------------------------------------------------------------------------------------------------------------------------------------------------------------|------------------------|
| GALNACASE_OGLYCAN1e | N-acetylglactosaminidase, mucin-type O-glycans, extracellular | BT_0065                                          | O-Glycan Degradation          | Evidence from literature   | PMID: 19403529, PMID: 18996345, PMID: 10430883, PMID: 848954 | <i>B. thetaiotaomicron</i> is well known to degrade mucin. The subsystem "O-Glycan Biosynthesis" in Recon1 represents mucin biosynthesis. BT_0065 is N-acetylglactosaminidase according to PMID: 19403529. There may be other enzymes performing this function. |                        |
| GALNACASE_OGLYCAN2e | N-acetylglactosaminidase, mucin-type O-glycans, extracellular | BT_0065                                          | O-Glycan Degradation          | Evidence from literature   | PMID: 19403529, PMID: 18996345, PMID: 10430883, PMID: 848954 | <i>B. thetaiotaomicron</i> is well known to degrade mucin. The subsystem "O-Glycan Biosynthesis" in Recon1 represents mucin biosynthesis. BT_0065 is N-acetylglactosaminidase according to PMID: 19403529. There may be other enzymes performing this function. | 3.4.13.20 or 3.4.13.18 |
| GALNACASE_OGLYCAN3e | N-acetylglactosaminidase, mucin-type O-glycans, extracellular | BT_0065                                          | O-Glycan Degradation          | Evidence from literature   | PMID: 19403529, PMID: 18996345, PMID: 10430883, PMID: 848954 | <i>B. thetaiotaomicron</i> is well known to degrade mucin. The subsystem "O-Glycan Biosynthesis" in Recon1 represents mucin biosynthesis. BT_0065 is N-acetylglactosaminidase according to PMID: 19403529. There may be other enzymes performing this function. |                        |
| GALOX               | Galactose oxidase                                             | BT_4040 or BT_4632                               | Alternate Carbon Metabolism   | Evidence from literature   | PMID: 22036470                                               | Reaction R01098 in KEGG. The gene may be wrongly annotated and have a different function (upregulated during growth on human milk oligosaccharides).                                                                                                            | 2.7.1.51               |
| GALUi               | UTP-glucose-1-phosphate uridylyltransferase (irreversible)    |                                                  | Cell Envelope Biosynthesis    | Evidence from literature   | PMID:19460428                                                | This reaction is necessary to produce UDP-glucose for lipopolysaccharide biosynthesis. No gene annotation is available, however. The structure of <i>B. thetaiotaomicron</i> LPS is described in PMID:19460428.                                                 | 2.7.7.9                |
| GAM2STASE_HS1       | N-sulfoglucosamine sulfohydrolase, heparin degradation        | ((BT_1624 and BT_0238) or (BT_3796 and BT_0238)) | Glycosaminoglycan Degradation | Evidence from literature   | PMID:21507958, PMID:19801541, PMID:7574611                   | <i>B. thetaiotaomicron</i> specific putative heparin sulfate degradation pathway. Requires sulfatase-maturing enzyme (BT_0238) to be functional. Not sure if annotation (putative secreted sulfatase) is correct.                                               | 3.10.1.1               |

| BIGG Rxn ID   | Function                                               | GPR                                              | Subsystem                     | Reason for addition      | Reference                                                                                                                            | Notes                                                                                                                                                                                                                                                                                                                                                                                                                                                                                                                                                         | EC Number |
|---------------|--------------------------------------------------------|--------------------------------------------------|-------------------------------|--------------------------|--------------------------------------------------------------------------------------------------------------------------------------|---------------------------------------------------------------------------------------------------------------------------------------------------------------------------------------------------------------------------------------------------------------------------------------------------------------------------------------------------------------------------------------------------------------------------------------------------------------------------------------------------------------------------------------------------------------|-----------|
| GAM2STASE_HS2 | N-sulfoglucosamine sulfohydrolase, heparin degradation | ((BT_1624 and BT_0238) or (BT_3796 and BT_0238)) | Glycosaminoglycan Degradation | Evidence from literature | PMID:19801541, PMID:7574611                                                                                                          | <i>B. thetaiotaomicron</i> specific putative heparin sulfate degradation pathway. Not sure if annotation (putative secreted sulfatase) is correct.                                                                                                                                                                                                                                                                                                                                                                                                            | 3.10.1.1  |
| GAM2STASE_HS3 | N-sulfoglucosamine sulfohydrolase, heparin degradation | ((BT_1624 and BT_0238) or (BT_3796 and BT_0238)) | Glycosaminoglycan Degradation | Evidence from literature | PMID:19801541, PMID:7574611                                                                                                          | <i>B. thetaiotaomicron</i> specific putative heparin sulfate degradation pathway. Not sure if annotation (putative secreted sulfatase) is correct.                                                                                                                                                                                                                                                                                                                                                                                                            | 3.10.1.1  |
| GAMt2r        | glucosamine transport (proton symport)                 |                                                  | Transport, Extracellular      | Evidence from literature | PMID:7240086                                                                                                                         | <i>B. thetaiotaomicron</i> metabolizes glucosamine.                                                                                                                                                                                                                                                                                                                                                                                                                                                                                                           |           |
| GCHOLAH       | Bile acid hydrolase (glycocholate)                     | (BT_1259 or BT_2086)                             | Bile Acid Metabolism          | Evidence from literature | PMID:10993, Dworkin, M. and S. Falkow (2006). The prokaryotes : a handbook on the biology of bacteria. New York ; [London], Springer | Enzyme was demonstrated experimentally (PMID:10993). Growth of <i>B. thetaiotaomicron</i> is stimulated by 20% bile.                                                                                                                                                                                                                                                                                                                                                                                                                                          | 3.5.1.24  |
| GCHOLat2      | glycocholate transport via sodium cotransport          |                                                  | Transport, Extracellular      | Evidence from literature | PMID:10993                                                                                                                           | <i>B. thetaiotaomicron</i> metabolizes glycocholate and taurocholate. A bile acid/ sodium symporter is annotated for <i>Bacteroides salanitronis</i> .                                                                                                                                                                                                                                                                                                                                                                                                        |           |
| GLCAASE       | beta-glucuronidase/ chondroitinase                     | (BT_3292 or BT_4151 or BT_3324 or BT_3350)       | Glycosaminoglycan Degradation | Evidence from literature | PMID:6782076, PMID:7574611, PMID:848954, PMID:18996345                                                                               | <i>B. thetaiotaomicron</i> ferments chondroitin sulfate. The polysaccharide utilization locus (PUL) BT3324 - BT3350 is upregulated in its presence. BT_3348 degrades chondroitin sulfate to oligosaccharides, which requires BT_3331 (sus C homolog) and BT_3332 (csuF). BT_3324 and BT_3350 degrade the desulfated oligosaccharides to monosaccharides. Based on Figure 3, PMID:18996345. BT_3292 and BT_4151 were added based on gene annotation, not sure they perform this role. Reaction takes place in periplasm (extracellular for modeling purposes). | 3.2.1.31  |
| GLCAASE_HS    | Beta-glucuronidase, heparin degradation                | (BT_3292 or BT_4151)                             | Glycosaminoglycan Degradation | Evidence from literature | PMID:19801541, PMID:7574611                                                                                                          | <i>B. thetaiotaomicron</i> specific putative heparin sulfate degradation pathway.                                                                                                                                                                                                                                                                                                                                                                                                                                                                             | 3.2.1.31  |

| <b>BIGG Rxn ID</b> | <b>Function</b>                                    | <b>GPR</b>                                 | <b>Subsystem</b>              | <b>Reason for addition</b> | <b>Reference</b>                                       | <b>Notes</b>                                                                                                                                                                                                                                                                                                                                                                                                                                                                                                                                                  | <b>EC Number</b> |
|--------------------|----------------------------------------------------|--------------------------------------------|-------------------------------|----------------------------|--------------------------------------------------------|---------------------------------------------------------------------------------------------------------------------------------------------------------------------------------------------------------------------------------------------------------------------------------------------------------------------------------------------------------------------------------------------------------------------------------------------------------------------------------------------------------------------------------------------------------------|------------------|
| GLCAASE_HSe        | Beta-glucuronidase, heparin degradation            | (BT_3292 or BT_4151)                       | Glycosaminoglycan Degradation | Evidence from literature   | PMID:19801541, PMID:7574611                            | <i>B. thetaiotaomicron</i> specific putative heparin sulfate degradation pathway.                                                                                                                                                                                                                                                                                                                                                                                                                                                                             |                  |
| GLCAASE8e          | beta-glucuronidase, hyaluronan degradation         | (BT_3292 or BT_4151)                       | Glycosaminoglycan Degradation | Evidence from literature   | PMID:848954, PMID:18996345                             | <i>B. thetaiotaomicron</i> ferments hyaluronan. The polysaccharide utilization locus (PUL) BT3324 - BT3350 is upregulated in its presence.                                                                                                                                                                                                                                                                                                                                                                                                                    | 3.2.1.31         |
| GLCAASE9e          | beta-glucuronidase, hyaluronan degradation         | (BT_3292 or BT_4151)                       | Glycosaminoglycan Degradation | Evidence from literature   | PMID:848954, PMID:18996345                             | <i>B. thetaiotaomicron</i> ferments hyaluronan. The polysaccharide utilization locus (PUL) BT3324 - BT3350 is upregulated in its presence.                                                                                                                                                                                                                                                                                                                                                                                                                    | 3.2.1.31         |
| GLCAASEe           | beta-glucuronidase/chondroitinase                  | (BT_3292 or BT_4151 or BT_3324 or BT_3350) | Glycosaminoglycan Degradation | Evidence from literature   | PMID:6782076, PMID:7574611, PMID:848954, PMID:18996345 | <i>B. thetaiotaomicron</i> ferments chondroitin sulfate. The polysaccharide utilization locus (PUL) BT3324 - BT3350 is upregulated in its presence. BT_3348 degrades chondroitin sulfate to oligosaccharides, which requires BT_3331 (sus C homolog) and BT_3332 (csuF). BT_3324 and BT_3350 degrade the desulfated oligosaccharides to monosaccharides. Based on Figure 3, PMID:18996345. BT_3292 and BT_4151 were added based on gene annotation, not sure they perform this role. Reaction takes place in periplasm (extracellular for modeling purposes). |                  |
| GLCNACASE_HS1      | Alpha-N-acetylglucosaminidase, heparin degradation | (BT_0438 or BT_3590 or BT_4359)            | Glycosaminoglycan Degradation | Evidence from literature   | PMID:19801541, PMID:7574611                            | <i>B. thetaiotaomicron</i> specific putative heparin sulfate degradation pathway.                                                                                                                                                                                                                                                                                                                                                                                                                                                                             | 3.2.1.50         |
| GLCNACASE_HS2      | Alpha-N-acetylglucosaminidase, heparin degradation | (BT_0438 or BT_3590 or BT_4359)            | Glycosaminoglycan Degradation | Evidence from literature   | PMID:19801541, PMID:7574611                            | <i>B. thetaiotaomicron</i> specific putative heparin sulfate degradation pathway.                                                                                                                                                                                                                                                                                                                                                                                                                                                                             | 3.2.1.50         |
| GLCNACASE_HS3      | Alpha-N-acetylglucosaminidase, heparin degradation | (BT_0438 or BT_3590 or BT_4359)            | Glycosaminoglycan Degradation | Evidence from literature   | PMID:19801541, PMID:7574611                            | <i>B. thetaiotaomicron</i> specific putative heparin sulfate degradation pathway.                                                                                                                                                                                                                                                                                                                                                                                                                                                                             | 3.2.1.50         |

| <b>BIGG Rxn ID</b>  | <b>Function</b>                                              | <b>GPR</b>                                                                                                                                                                                                                                                                                                                                                                                                                                                      | <b>Subsystem</b>     | <b>Reason for addition</b> | <b>Reference</b>                             | <b>Notes</b>                                                                                                                                                                                                                                                              | <b>EC Number</b> |
|---------------------|--------------------------------------------------------------|-----------------------------------------------------------------------------------------------------------------------------------------------------------------------------------------------------------------------------------------------------------------------------------------------------------------------------------------------------------------------------------------------------------------------------------------------------------------|----------------------|----------------------------|----------------------------------------------|---------------------------------------------------------------------------------------------------------------------------------------------------------------------------------------------------------------------------------------------------------------------------|------------------|
| GLCNACASE_OGLYCAN1e | N-acetylglucosaminidase, mucin-type O-glycans, extracellular | (BT_2825 or BT_1038 or BT_1044 or BT_1048 or BT_0865 or BT_1282 or BT_3753 or BT_4132 or BT_4406 or BT_3985 or BT_3987) and ((BT_1039 and BT_1040) or (BT_1042 and BT_1043) or (BT_1046 and BT_1047) or (BT_4134 and BT_4135) or (BT_4404 and BT_4405) or (BT_3983 and BT_3984) or (BT_0866 and BT_0867) or (BT_3751 and BT_3752) or (BT_1280 and BT_1281) or (BT_3958 and BT_3959) or (BT_4633 and BT_4634) or (BT_2818 and BT_2819) or (BT_2820 and BT_2821)) | O-Glycan Degradation | Evidence from literature   | PMID: 18996345, PMID: 10430883, PMID: 848954 | B. thetaiotaomicron is well known to degrade mucin, the genes included in the GPR are upregulated during growth on mucin. The subsystem "O-Glycan Biosynthesis" in Recon1 represents mucin biosynthesis. Involves N-acetylglucosaminidase, susC, susD (binding proteins). |                  |

| <b>BIGG Rxn ID</b>  | <b>Function</b>                                              | <b>GPR</b>                                                                                                                                                                                                                                                                                                                                                                                                                                                      | <b>Subsystem</b>     | <b>Reason for addition</b> | <b>Reference</b>                             | <b>Notes</b>                                                                                                                                                                                                                                                              | <b>EC Number</b> |
|---------------------|--------------------------------------------------------------|-----------------------------------------------------------------------------------------------------------------------------------------------------------------------------------------------------------------------------------------------------------------------------------------------------------------------------------------------------------------------------------------------------------------------------------------------------------------|----------------------|----------------------------|----------------------------------------------|---------------------------------------------------------------------------------------------------------------------------------------------------------------------------------------------------------------------------------------------------------------------------|------------------|
| GLCNACASE_OGLYCAN2e | N-acetylglucosaminidase, mucin-type O-glycans, extracellular | (BT_2825 or BT_1038 or BT_1044 or BT_1048 or BT_0865 or BT_1282 or BT_3753 or BT_4132 or BT_4406 or BT_3985 or BT_3987) and ((BT_1039 and BT_1040) or (BT_1042 and BT_1043) or (BT_1046 and BT_1047) or (BT_4134 and BT_4135) or (BT_4404 and BT_4405) or (BT_3983 and BT_3984) or (BT_0866 and BT_0867) or (BT_3751 and BT_3752) or (BT_1280 and BT_1281) or (BT_3958 and BT_3959) or (BT_4633 and BT_4634) or (BT_2818 and BT_2819) or (BT_2820 and BT_2821)) | O-Glycan Degradation | Evidence from literature   | PMID: 18996345, PMID: 10430883, PMID: 848954 | B. thetaiotaomicron is well known to degrade mucin, the genes included in the GPR are upregulated during growth on mucin. The subsystem "O-Glycan Biosynthesis" in Recon1 represents mucin biosynthesis. Involves N-acetylglucosaminidase, susC, susD (binding proteins). |                  |

| <b>BIGG Rxn ID</b>  | <b>Function</b>                                              | <b>GPR</b>                                                                                                                                                                                                                                                                                                                                                                                                                                                      | <b>Subsystem</b>     | <b>Reason for addition</b> | <b>Reference</b>                             | <b>Notes</b>                                                                                                                                                                                                                                                              | <b>EC Number</b> |
|---------------------|--------------------------------------------------------------|-----------------------------------------------------------------------------------------------------------------------------------------------------------------------------------------------------------------------------------------------------------------------------------------------------------------------------------------------------------------------------------------------------------------------------------------------------------------|----------------------|----------------------------|----------------------------------------------|---------------------------------------------------------------------------------------------------------------------------------------------------------------------------------------------------------------------------------------------------------------------------|------------------|
| GLCNACASE_OGLYCAN3e | N-acetylglucosaminidase, mucin-type O-glycans, extracellular | (BT_2825 or BT_1038 or BT_1044 or BT_1048 or BT_0865 or BT_1282 or BT_3753 or BT_4132 or BT_4406 or BT_3985 or BT_3987) and ((BT_1039 and BT_1040) or (BT_1042 and BT_1043) or (BT_1046 and BT_1047) or (BT_4134 and BT_4135) or (BT_4404 and BT_4405) or (BT_3983 and BT_3984) or (BT_0866 and BT_0867) or (BT_3751 and BT_3752) or (BT_1280 and BT_1281) or (BT_3958 and BT_3959) or (BT_4633 and BT_4634) or (BT_2818 and BT_2819) or (BT_2820 and BT_2821)) | O-Glycan Degradation | Evidence from literature   | PMID: 18996345, PMID: 10430883, PMID: 848954 | B. thetaiotaomicron is well known to degrade mucin, the genes included in the GPR are upregulated during growth on mucin. The subsystem "O-Glycan Biosynthesis" in Recon1 represents mucin biosynthesis. Involves N-acetylglucosaminidase, susC, susD (binding proteins). |                  |

| <b>BIGG Rxn ID</b>  | <b>Function</b>                                              | <b>GPR</b>                                                                                                                                                                                                                                                                                                                                                                                                                                                      | <b>Subsystem</b>     | <b>Reason for addition</b> | <b>Reference</b>                             | <b>Notes</b>                                                                                                                                                                                                                                                              | <b>EC Number</b> |
|---------------------|--------------------------------------------------------------|-----------------------------------------------------------------------------------------------------------------------------------------------------------------------------------------------------------------------------------------------------------------------------------------------------------------------------------------------------------------------------------------------------------------------------------------------------------------|----------------------|----------------------------|----------------------------------------------|---------------------------------------------------------------------------------------------------------------------------------------------------------------------------------------------------------------------------------------------------------------------------|------------------|
| GLCNACASE_OGLYCAN4e | N-acetylglucosaminidase, mucin-type O-glycans, extracellular | (BT_2825 or BT_1038 or BT_1044 or BT_1048 or BT_0865 or BT_1282 or BT_3753 or BT_4132 or BT_4406 or BT_3985 or BT_3987) and ((BT_1039 and BT_1040) or (BT_1042 and BT_1043) or (BT_1046 and BT_1047) or (BT_4134 and BT_4135) or (BT_4404 and BT_4405) or (BT_3983 and BT_3984) or (BT_0866 and BT_0867) or (BT_3751 and BT_3752) or (BT_1280 and BT_1281) or (BT_3958 and BT_3959) or (BT_4633 and BT_4634) or (BT_2818 and BT_2819) or (BT_2820 and BT_2821)) | O-Glycan Degradation | Evidence from literature   | PMID: 18996345, PMID: 10430883, PMID: 848954 | B. thetaiotaomicron is well known to degrade mucin, the genes included in the GPR are upregulated during growth on mucin. The subsystem "O-Glycan Biosynthesis" in Recon1 represents mucin biosynthesis. Involves N-acetylglucosaminidase, susC, susD (binding proteins). |                  |

| <b>BIGG Rxn ID</b>  | <b>Function</b>                                              | <b>GPR</b>                                                                                                                                                                                                                                                                                                                                                                                                                                                      | <b>Subsystem</b>     | <b>Reason for addition</b> | <b>Reference</b>                             | <b>Notes</b>                                                                                                                                                                                                                                                              | <b>EC Number</b> |
|---------------------|--------------------------------------------------------------|-----------------------------------------------------------------------------------------------------------------------------------------------------------------------------------------------------------------------------------------------------------------------------------------------------------------------------------------------------------------------------------------------------------------------------------------------------------------|----------------------|----------------------------|----------------------------------------------|---------------------------------------------------------------------------------------------------------------------------------------------------------------------------------------------------------------------------------------------------------------------------|------------------|
| GLCNACASE_OGLYCAN5e | N-acetylglucosaminidase, mucin-type O-glycans, extracellular | (BT_2825 or BT_1038 or BT_1044 or BT_1048 or BT_0865 or BT_1282 or BT_3753 or BT_4132 or BT_4406 or BT_3985 or BT_3987) and ((BT_1039 and BT_1040) or (BT_1042 and BT_1043) or (BT_1046 and BT_1047) or (BT_4134 and BT_4135) or (BT_4404 and BT_4405) or (BT_3983 and BT_3984) or (BT_0866 and BT_0867) or (BT_3751 and BT_3752) or (BT_1280 and BT_1281) or (BT_3958 and BT_3959) or (BT_4633 and BT_4634) or (BT_2818 and BT_2819) or (BT_2820 and BT_2821)) | O-Glycan Degradation | Evidence from literature   | PMID: 18996345, PMID: 10430883, PMID: 848954 | B. thetaiotaomicron is well known to degrade mucin, the genes included in the GPR are upregulated during growth on mucin. The subsystem "O-Glycan Biosynthesis" in Recon1 represents mucin biosynthesis. Involves N-acetylglucosaminidase, susC, susD (binding proteins). |                  |

| <b>BIGG Rxn ID</b>  | <b>Function</b>                                              | <b>GPR</b>                                                                                                                                                                                                                                                                                                                                                                                                                                                      | <b>Subsystem</b>            | <b>Reason for addition</b> | <b>Reference</b>                             | <b>Notes</b>                                                                                                                                                                                                                                                              | <b>EC Number</b> |
|---------------------|--------------------------------------------------------------|-----------------------------------------------------------------------------------------------------------------------------------------------------------------------------------------------------------------------------------------------------------------------------------------------------------------------------------------------------------------------------------------------------------------------------------------------------------------|-----------------------------|----------------------------|----------------------------------------------|---------------------------------------------------------------------------------------------------------------------------------------------------------------------------------------------------------------------------------------------------------------------------|------------------|
| GLCNACASE_OGLYCAN6e | N-acetylglucosaminidase, mucin-type O-glycans, extracellular | (BT_2825 or BT_1038 or BT_1044 or BT_1048 or BT_0865 or BT_1282 or BT_3753 or BT_4132 or BT_4406 or BT_3985 or BT_3987) and ((BT_1039 and BT_1040) or (BT_1042 and BT_1043) or (BT_1046 and BT_1047) or (BT_4134 and BT_4135) or (BT_4404 and BT_4405) or (BT_3983 and BT_3984) or (BT_0866 and BT_0867) or (BT_3751 and BT_3752) or (BT_1280 and BT_1281) or (BT_3958 and BT_3959) or (BT_4633 and BT_4634) or (BT_2818 and BT_2819) or (BT_2820 and BT_2821)) | O-Glycan Degradation        | Evidence from literature   | PMID: 18996345, PMID: 10430883, PMID: 848954 | B. thetaiotaomicron is well known to degrade mucin, the genes included in the GPR are upregulated during growth on mucin. The subsystem "O-Glycan Biosynthesis" in Recon1 represents mucin biosynthesis. Involves N-acetylglucosaminidase, susC, susD (binding proteins). |                  |
| GLCS2               | glycogen synthase (UDPGlc)                                   | (BT_1294 or BT_4307)                                                                                                                                                                                                                                                                                                                                                                                                                                            | Alternate Carbon Metabolism | Evidence from literature   | PMID:37285                                   | Gene annotation from NCBI Gene (last updated 01.01.11). It was demonstrated that <i>B. thetaiotaomicron</i> produces a glycogen.                                                                                                                                          | 2.4.1.11         |

| BIGG Rxn ID | Function                                            | GPR                                                   | Subsystem                                 | Reason for addition                            | Reference                                                                                                                               | Notes                                                                                                                                                                                                                  | EC Number |
|-------------|-----------------------------------------------------|-------------------------------------------------------|-------------------------------------------|------------------------------------------------|-----------------------------------------------------------------------------------------------------------------------------------------|------------------------------------------------------------------------------------------------------------------------------------------------------------------------------------------------------------------------|-----------|
| GLCt2r      | GLCt2r                                              | (BT_3589 or BT_1758 or BT_0371 or BT_4311 or BT_4653) | Transport, Extracellular                  | Evidence from literature                       | PMID: 16887504                                                                                                                          | <i>B. thetaiotaomicron</i> grows on glucose, does not utilize a phosphotransferase system for uptake. Annotation from KEGG.                                                                                            |           |
| GLCt4       | glucose transport via sodium symport                | BT_0355                                               | Transport, Extracellular                  | Evidence from literature                       | PMID: 4853401                                                                                                                           | <i>B. thetaiotaomicron</i> uses glucose as sole carbon source.                                                                                                                                                         |           |
| GLNt2r      | L-glutamine reversible transport via proton symport |                                                       | Transport, Extracellular                  | Evidence from literature                       | Dworkin, M. and S. Falkow (2006). The prokaryotes : a handbook on the biology of bacteria. New York ; [London], Springer                | <i>B. thetaiotaomicron</i> is weakly proteolytic, so a transport reaction for all amino acids is assumed to be present.                                                                                                |           |
| GLUABUT7    | 4-aminobutyrate/glutamate antiport                  | BT_2573                                               | Transport, Extracellular                  | Manually added gene annotation from databases  |                                                                                                                                         | Annotation from TransportDB (www.membranetransport.org).                                                                                                                                                               |           |
| GLYASNt     | Glycyl-L-asparagine transport via proton symport    | (BT_0580 or BT_4385 or BT_1086)                       | Transport, Extracellular                  | Manually added gene annotation from databases  |                                                                                                                                         | Genes added based on TransportDB (last consulted 06.06.12).                                                                                                                                                            |           |
| GLYASPt     | Glycyl-L-aspartate transport via proton symport     | (BT_0580 or BT_4385 or BT_1086)                       | Transport, Extracellular                  | Manually added gene annotation from databases  |                                                                                                                                         | Genes added based on TransportDB (last consulted 06.06.12).                                                                                                                                                            |           |
| GLYCOe      | glycogen hydrolysis by samylases                    | (BT_3698 and BT_3701 and BT_3702)                     | Alternate Carbon Metabolism               | Evidence from literature                       | Dworkin, M. and S. Falkow (2006). The prokaryotes : a handbook on the biology of bacteria. New York ; [London], Springer, PMID:16788175 | <i>B. thetaiotaomicron</i> ferments glycogen. In <i>B. fragilis</i> , glycogen utilization seems to be performed by the starch utilization operon. It is assumed this is also the case in <i>B. thetaiotaomicron</i> . |           |
| GLYD        | glycerate dehydrogenase                             | BT_1207                                               | Glycine, Serine, and Threonine Metabolism | Curation of incorrect annotation in Model SEED |                                                                                                                                         | Gene was annotated by Model SEED as phosphoglycerate oxidoreductase (EC 1.1.1.95). NCBI Gene (last updated 21.05.11) confirms annotation as glycerate dehydrogenase.                                                   | 1.1.1.29  |
| GLYGLNt     | Glycyl-L-glutamine transport via proton symport     | (BT_0580 or BT_4385 or BT_1086)                       | Transport, Extracellular                  | Manually added gene annotation from databases  |                                                                                                                                         | Genes added based on TransportDB (last consulted 06.06.12).                                                                                                                                                            |           |
| GLYGLUt     | Glycyl-L-glutamate transport via proton symport     | (BT_0580 or BT_4385 or BT_1086)                       | Transport, Extracellular                  | Manually added gene annotation from databases  |                                                                                                                                         | Genes added based on TransportDB (last consulted 06.06.12).                                                                                                                                                            | 3.2.1.18  |

| <b>BIGG Rxn ID</b> | <b>Function</b>                                                          | <b>GPR</b>                                                                                        | <b>Subsystem</b>            | <b>Reason for addition</b>                    | <b>Reference</b>               | <b>Notes</b>                                                                                 | <b>EC Number</b> |
|--------------------|--------------------------------------------------------------------------|---------------------------------------------------------------------------------------------------|-----------------------------|-----------------------------------------------|--------------------------------|----------------------------------------------------------------------------------------------|------------------|
| GLYGLYHyi          | hydrolysis of glycylglycine, irreversible                                | (BT_3464 or BT_3926 or BT_3996 or BT_0149 or BT_4193 or BT_3254 or BT_1260 or BT_1261 or BT_1314) | Peptide Degradation         | Manually added gene annotation from databases |                                |                                                                                              | 2.6.1.85         |
| GLYGLYt            | Glycylglycine transport                                                  | (BT_0580 or BT_4385 or BT_1086)                                                                   | Transport, Extracellular    | Manually added gene annotation from databases |                                | Genes added based on TransportDB (last consulted 06.06.12).                                  |                  |
| GLYLEUHYDROe       | hydrolysis of Glycylleucine by predicted non-cytosolic leucine peptidase | BT_2548                                                                                           | Peptide Degradation         | Evidence from literature                      | PMID:12663928                  | Predicted non-cytosolic in PMID:12663928. Assumed to be extracellular for modeling purposes. | 3.4.11.15        |
| GLYMETt            | Glycyl-L-methionine transport via proton symport                         | (BT_0580 or BT_4385 or BT_1086)                                                                   | Transport, Extracellular    | Manually added gene annotation from databases |                                | Genes added based on TransportDB (last consulted 06.06.12).                                  |                  |
| GLYPHEHYi          | hydrolysis of glycylphenylalanine, irreversible                          | (BT_3464 or BT_3926 or BT_3996 or BT_0149 or BT_4193 or BT_3254 or BT_1260 or BT_1261 or BT_1314) | Peptide Degradation         | Manually added gene annotation from databases |                                |                                                                                              |                  |
| GLYPHEt            | Glycylphenylalanine transport                                            | (BT_0580 or BT_4385 or BT_1086)                                                                   | Transport, Extracellular    | Manually added gene annotation from databases |                                | Genes added based on TransportDB (last consulted 06.06.12).                                  |                  |
| GLYPROPRO1e        | hydrolysis of Glycylproline by predicted non-cytosolic proline peptidase | BT_0587                                                                                           | Peptide Degradation         | Evidence from literature                      | PMID:12663928                  | Predicted non-cytosolic in PMID:12663928. Assumed to be extracellular for modeling purposes. | 3.4.13.9         |
| GLYPROt            | Glycyl-L-proline transport via proton symport                            | (BT_0580 or BT_4385 or BT_1086)                                                                   | Transport, Extracellular    | Manually added gene annotation from databases |                                | Genes added based on TransportDB (last consulted 06.06.12).                                  |                  |
| GLYt2r             | glycine reversible transport via proton symport                          |                                                                                                   | Transport, Extracellular    | Manual gapfilling                             |                                |                                                                                              |                  |
| GLYTYRt            | Glycyl-L-tyrosine transport via proton symport                           | (BT_0580 or BT_4385 or BT_1086)                                                                   | Transport, Extracellular    | Manually added gene annotation from databases |                                | Genes added based on TransportDB (last consulted 06.06.12).                                  |                  |
| GMAND              | GDP-D-mannose dehydratase                                                | BT_1224                                                                                           | Alternate Carbon Metabolism | Evidence from literature                      | DOI: 10.1007/s10068-010-0120-0 | Gene was cloned and gene product was characterized.                                          | 4.2.1.47         |

| BIGG Rxn ID | Function                                                  | GPR                                                                                                       | Subsystem                                  | Reason for addition                           | Reference                    | Notes                                                                                                                                                                                                                                                                                  | EC Number |
|-------------|-----------------------------------------------------------|-----------------------------------------------------------------------------------------------------------|--------------------------------------------|-----------------------------------------------|------------------------------|----------------------------------------------------------------------------------------------------------------------------------------------------------------------------------------------------------------------------------------------------------------------------------------|-----------|
| GMHEPAT     | D-glycero-D-manno-heptose 1-phosphate adenylyltransferase |                                                                                                           | Lipopolysaccharide Biosynthesis            | Evidence from literature                      | PMID:20974832, PMID:19460428 | The structure of <i>B. thetaiotaomicron</i> LPS was studied, but the exact LPS synthesis pathway is unknown.                                                                                                                                                                           |           |
| GMHEPK      | D-glycero-D-manno-heptose 7-phosphate kinase              |                                                                                                           | Lipopolysaccharide Biosynthesis            | Evidence from literature                      | PMID:20974832, PMID:19460428 | The structure of <i>B. thetaiotaomicron</i> LPS was studied, but the exact LPS synthesis pathway is unknown.                                                                                                                                                                           |           |
| GMHEPPA     | D-glycero-D-manno-heptose 1,7-bisphosphate phosphatase    | BT_0477                                                                                                   | Lipopolysaccharide Biosynthesis            | Evidence from literature                      | PMID:20050615                | The enzyme was purified and enzyme kinetics were studied.                                                                                                                                                                                                                              |           |
| GTPDPDP     | guanosine-5-triphosphate,3-diphosphate diphosphatase      | BT_0540                                                                                                   | Cofactor and Prosthetic Group Biosynthesis | Manually added gene annotation from databases |                              | Included based on KEGG and NCBI putative gene annotation.                                                                                                                                                                                                                              | 3.6.1.40  |
| H2St        | h2s transport (diffusion)                                 |                                                                                                           | Transport, Extracellular                   | Evidence from literature                      | PMID:4853401                 | Sulfide (alternatively cysteine) is required as sulfur source.                                                                                                                                                                                                                         |           |
| H2td        | hydrogen transport                                        |                                                                                                           | Transport, Extracellular                   | Evidence from literature                      | PMID:20444704                | <i>B. thetaiotaomicron</i> produces hydrogen.                                                                                                                                                                                                                                          |           |
| HCYSMT      | homocysteine S-methyltransferase                          | BT_0180                                                                                                   | Methionine Metabolism                      | Manually added gene annotation from databases |                              |                                                                                                                                                                                                                                                                                        |           |
| HEMEti      | Heme transport via ABC system                             | (BT_0491 and BT_0492 and BT_0493 and BT_0494 and BT_0495 and BT_0496 and BT_0497 and BT_0498 and BT_0499) | Transport, Extracellular                   | Evidence from literature                      | PMID:4853401, PMID:17074906  | <i>B. thetaiotaomicron</i> requires heme for growth. Lewis et al. (2006) characterized the putative heme uptake operon in the related species <i>Porphyromonas gingivalis</i> ( <i>Bacteroidales</i> order) and located the genes in <i>B. thetaiotaomicron</i> by using BLAST search. |           |
| HEPARL1_e   | Heparin Lyase I, extracellular                            | BT_4675                                                                                                   | Glycosaminoglycan Degradation              | Evidence from literature                      | PMID:19801541, PMID:7574611  | Heparin Lyase I cleaves the glycosidic linkage to the nonreducing end of iduronate. <i>B. thetaiotaomicron</i> specific putative pathway.                                                                                                                                              | 4.2.2.7   |
| HEX10       | hexokinase (D-glucosamine:ATP)                            | BT_2430                                                                                                   | Aminosugar Metabolism                      | Evidence from literature                      | PMID:7240086                 | <i>B. thetaiotaomicron</i> is able to ferment glucosamine. Proposed pathway, not sure if glucosamine is utilized in this way.                                                                                                                                                          | 2.7.1.1   |
| HEX11       | hexokinase (D-galactosamine:ATP)                          |                                                                                                           | Aminosugar Metabolism                      | Evidence from literature                      | PMID: 6367911                | Galactosamine is metabolized by <i>B. thetaiotaomicron</i> to some extent and appears to be phosphorylated (though the compound does not support growth in vivo).                                                                                                                      |           |

| BIGG Rxn ID | Function                                               | GPR                                                                                                                                                                                                                                                                                             | Subsystem                        | Reason for addition      | Reference                                                                                                                 | Notes                                                                                                                                                                                                                                                                      | EC Number |
|-------------|--------------------------------------------------------|-------------------------------------------------------------------------------------------------------------------------------------------------------------------------------------------------------------------------------------------------------------------------------------------------|----------------------------------|--------------------------|---------------------------------------------------------------------------------------------------------------------------|----------------------------------------------------------------------------------------------------------------------------------------------------------------------------------------------------------------------------------------------------------------------------|-----------|
| HEX4        | hexokinase (D-mannose:ATP)                             | (BT_2430 or BT_2493 or BT_4654)                                                                                                                                                                                                                                                                 | Alternate Carbon Metabolism      | Evidence from literature | PMID:15659667                                                                                                             | Reversible reaction in SEED. Enzyme was characterized experimentally for <i>B. fragilis</i> .                                                                                                                                                                              | 2.7.1.7   |
| HIS2r       | L-histidine reversible transport via proton symport    |                                                                                                                                                                                                                                                                                                 | Transport, Extracellular         | Evidence from literature | Dworkin, M. and S. Falkow (2006). The prokaryotes : a handbook on the biology of bacteria. New York ; [London], Springer. | B. thetaiotaomicron is weakly proteolytic, so a transport reaction for all amino acids is assumed to be present.                                                                                                                                                           | 4.1.3.18  |
| HOMOGALASEe | Homogalacturonan degradation (citrus HG, 100 residues) | ((BT_4146 or BT_4149 or BT_4153 or BT_4155 or BT_4170 or BT_4183 or BT_4115 or BT_4116 or BT_4119 or BT_4123) and BT_4150 and BT_4175 and (BT_4109 or BT_4110) and ((BT_4670 and BT_4671) or (BT_4164 and BT_4165) or (BT_4113 and BT_4114) or (BT_4121 and BT_4122) or (BT_3680 and BT_3681))) | Plant Polysaccharide Degradation | Evidence from literature | PMID: 22205877, PMID: 12913136                                                                                            | Bacteroides thetaiotaomicron grows on citrus homogalacturonan. The genes included in the GPR are upregulated during growth. Enzymes/ proteins assumed to be involved: galacturonisidase, rhamnogalacturonan esterase, rhamnogalacturonan lyase, pectinesterase, susC/ SusD |           |

| BIGG Rxn ID | Function                                                     | GPR                             | Subsystem                     | Reason for addition      | Reference                                                                            | Notes                                                                                                                                                                                                                                                                                                                                                                                                                                                                                                                                                                                                                                                                                                                                                                                                                                                                                                                                                                                                       | EC Number |
|-------------|--------------------------------------------------------------|---------------------------------|-------------------------------|--------------------------|--------------------------------------------------------------------------------------|-------------------------------------------------------------------------------------------------------------------------------------------------------------------------------------------------------------------------------------------------------------------------------------------------------------------------------------------------------------------------------------------------------------------------------------------------------------------------------------------------------------------------------------------------------------------------------------------------------------------------------------------------------------------------------------------------------------------------------------------------------------------------------------------------------------------------------------------------------------------------------------------------------------------------------------------------------------------------------------------------------------|-----------|
| HYD4        | hydrogen:ferredoxin oxidoreductase                           | (BT_1210 or BT_0124 or BT_1834) | Central Metabolism            | Evidence from literature | PMID:893348, PMID:760499, PMID:12740060, PMID:11260473, PMID:12777495, PMID:20444704 | In the gut, this reaction regenerates NAD <sup>+</sup> via NADH:ferredoxin oxidoreductase (FDNADOX). <i>B. thetaiotaomicron</i> generates hydrogen as one of its fermentation end products; accumulation of hydrogen inhibits reoxidation of NADH. It is therefore assumed that it regenerates NAD <sup>+</sup> via this pathway, which leads to increased hydrogen partial pressure. Removal of hydrogen allows <i>B. thetaiotaomicron</i> to regenerate NAD <sup>+</sup> . The reaction can also be linked to pyruvate:ferredoxin oxidoreductase (PMID:11260473). Hydrogen also serves as an alternate electron donor for fumarate reduction via fumarate reductase (PMID:12777495). Gene annotation was proposed by the SEED Viewer, however, the reaction was not included in the draft model generated by Model SEED. NCBI Gene proposes NADH: ubiquinone oxidoreductase for BT_0124. According to KEGG, this reaction and ubiquinone-dependent hydrogenase (HYD1) are carried out by the same enzyme. | 1.12.7.2  |
| HYPUSUCORNS | putative succinylornithine synthesis (hypothetical reaction) |                                 | exchange/demand reaction      | Manual gapfilling        | PMID:16704984                                                                        | The metabolite is used for arginine biosynthesis, but its synthesis pathway is unknown.                                                                                                                                                                                                                                                                                                                                                                                                                                                                                                                                                                                                                                                                                                                                                                                                                                                                                                                     |           |
| ICDHyr      | isocitrate dehydrogenase (NADP)                              | BT_2071                         | TCA Cycle                     | Evidence from literature | PMID:11880608                                                                        | Enzyme was characterized experimentally for <i>B. fragilis</i> .                                                                                                                                                                                                                                                                                                                                                                                                                                                                                                                                                                                                                                                                                                                                                                                                                                                                                                                                            | 1.1.1.42  |
| IDOURASE    | L-iduronidase                                                |                                 | Glycosaminoglycan Degradation | Evidence from literature | PMID:18227125                                                                        | Assumed to be present since <i>B. thetaiotaomicron</i> can degrade dermatan, which contains iduronate .                                                                                                                                                                                                                                                                                                                                                                                                                                                                                                                                                                                                                                                                                                                                                                                                                                                                                                     | 3.2.1.76  |

| BIGG Rxn ID  | Function                                                  | GPR                                              | Subsystem                                          | Reason for addition                           | Reference                                     | Notes                                                                                                                                                                                                                                                                                                                                                                                                     | EC Number |
|--------------|-----------------------------------------------------------|--------------------------------------------------|----------------------------------------------------|-----------------------------------------------|-----------------------------------------------|-----------------------------------------------------------------------------------------------------------------------------------------------------------------------------------------------------------------------------------------------------------------------------------------------------------------------------------------------------------------------------------------------------------|-----------|
| IDOURASE_HS1 | Iduronidase, heparin degradation                          |                                                  | Glycosaminoglycan Degradation                      | Evidence from literature                      | PMID:19801541, PMID:7574611                   | <i>B. thetaiotaomicron</i> specific putative heparin sulfate degradation pathway. It is not known which enzyme performs this step.                                                                                                                                                                                                                                                                        | 3.2.1.76  |
| IDOURASE_HS2 | Iduronidase, heparin degradation                          |                                                  | Glycosaminoglycan Degradation                      | Evidence from literature                      | PMID:19801541, PMID:7574611                   | <i>B. thetaiotaomicron</i> specific putative heparin sulfate degradation pathway. It is not known which enzyme performs this step.                                                                                                                                                                                                                                                                        | 3.2.1.76  |
| IDOURASE_HS3 | Iduronidase, heparin degradation                          |                                                  | Glycosaminoglycan Degradation                      | Evidence from literature                      | PMID:19801541, PMID:7574611                   | <i>B. thetaiotaomicron</i> specific putative heparin sulfate degradation pathway. It is not known which enzyme performs this step.                                                                                                                                                                                                                                                                        | 3.2.1.76  |
| ILEt2r       | L-isoleucine reversible transport via proton symport      |                                                  | Transport, Extracellular                           | Evidence from literature                      | PMID:7462155                                  | <i>B. thetaiotaomicron</i> incorporates leucine, valine and isoleucine into its phospholipids, which suggests the presence of a transporter for these amino acids. However, it is not known which gene encodes this transporter.                                                                                                                                                                          |           |
| INULINASEe   | Inulin degradation, extracellular                         | (BT_1759 or BT_3082)                             | Plant Polysaccharide Degradation                   | Evidence from literature                      | PMID: 19251883, PMID: 19321416, PMID:20603004 | <i>B. thetaiotaomicron</i> grows on inulin (though slowly and less efficient than on levan).                                                                                                                                                                                                                                                                                                              |           |
| IOR2         | indolepyruvate ferredoxin oxidoreductase (phenylpyruvate) | (BT_0429 and BT_0430)                            | Tyrosine, Tryptophan, and Phenylalanine Metabolism | Evidence from literature                      | PMID:18396344, PMID:16887608                  | Added based on annotation from NCBI Gene. <i>B. thetaiotaomicron</i> produces phenylacetate as a minor fermentation product (PMID:18396344). The indolepyruvate-dependent reaction of this enzyme may not take place since indoleacetate (a product of this pathway) was not found in <i>B. thetaiotaomicron</i> . Phenylacetate is also formed in the gut from aromatic acid metabolism (PMID:16887608). | 1.2.7.8   |
| IPMD2        | (2R,3S)-3-methylmalate:NAD <sup>+</sup> oxidoreductase    | BT_1857                                          | Valine, Leucine, and Isoleucine Metabolism         | Manually added gene annotation from databases |                                               | Added based on annotation from KEGG Pathway                                                                                                                                                                                                                                                                                                                                                               | 1.1.1.85  |
| IS2TASE      | Iduronate 2-sulfatase                                     | ((BT_0238 and BT_0756) or (BT_0238 and BT_2914)) | Glycosaminoglycan Degradation                      | Evidence from literature                      | PMID:21507958                                 | BT_0238 encodes anSME (anaerobic Sulfatase-Maturing Enzyme).                                                                                                                                                                                                                                                                                                                                              | 3.1.6.13  |

| BIGG Rxn ID | Function                                   | GPR                                              | Subsystem                      | Reason for addition      | Reference                                                                                              | Notes                                                                                                                                                                                                                    | EC Number |
|-------------|--------------------------------------------|--------------------------------------------------|--------------------------------|--------------------------|--------------------------------------------------------------------------------------------------------|--------------------------------------------------------------------------------------------------------------------------------------------------------------------------------------------------------------------------|-----------|
| IS2TASE_HS1 | Iduronate 2-sulfatase, heparin degradation | ((BT_0238 and BT_0756) or (BT_0238 and BT_2914)) | Glycosaminoglycan Degradation  | Evidence from literature | PMID:21507958, PMID:19801541, PMID:7574611                                                             | <i>B. thetaiotaomicron</i> specific putative heparin sulfate degradation pathway. Requires sulfatase-maturing enzyme (BT_0238) to be functional.                                                                         | 3.1.6.13  |
| ISOBUt2r    | Isobutyrate transport via proton symport   |                                                  | Transport, Extracellular       | Evidence from literature | Krieg, N. R. (2010). Bergeys manual of systematic bacteriology, 2nd ed., volume 4. New York, Springer. | Isobutyrate and isovalerate are known secretion products of <i>B. thetaiotaomicron</i> . It is not known if transport of these metabolites consumes energy, and which transporter carries out this function.             |           |
| ISOCAPr12r  | Isocaproate transport via proton symport   |                                                  | Transport, Extracellular       | Evidence from literature | PMID:1541601, PMID:16887608                                                                            | Isocaproate is a minor product in the large intestine from leucine reduction. It is not known if this metabolite is produced in <i>B. thetaiotaomicron</i> . Needed for reaction LEUO to be element and charge balanced. |           |
| ISOVALt2r   | Isovalerate transport via proton symport   |                                                  | Transport, Extracellular       | Evidence from literature | Krieg, N. R. (2010). Bergeys manual of systematic bacteriology, 2nd ed., volume 4. New York, Springer. | Isobutyrate and isovalerate are known secretion products of <i>B. thetaiotaomicron</i> . It is not known if transport of these metabolites consumes energy, and which transporter carries out this function.             |           |
| KAS1        | b-ketoacyl synthetase (Iso-C14:0)          | ((BT_0122 and BT_3358) or (BT_3358 and BT_3834)) | Glycerophospholipid Metabolism | Evidence from literature | PMID:6102980, PMID:7440508, PMID:7204330, PMID:19460428                                                | <i>B. thetaiotaomicron</i> is well known to produce iso- and anteiso-branched fatty acids besides straight-chain fatty acids.                                                                                            | 2.3.1.41  |
| KAS11       | b-ketoacyl synthetase (Iso-C17:0)          | ((BT_0122 and BT_3358) or (BT_3358 and BT_3834)) | Glycerophospholipid Metabolism | Evidence from literature | PMID:6102980, PMID:7440508, PMID:7204330, PMID:19460428                                                | <i>B. thetaiotaomicron</i> is well known to produce iso- and anteiso-branched fatty acids besides straight-chain fatty acids.                                                                                            | 2.3.1.41  |
| KAS12       | b-ketoacyl synthetase (Anteiso-C17:0)      | ((BT_0122 and BT_3358) or (BT_3358 and BT_3834)) | Glycerophospholipid Metabolism | Evidence from literature | PMID:6102980, PMID:7440508, PMID:7204330, PMID:19460428                                                | <i>B. thetaiotaomicron</i> is well known to produce iso- and anteiso-branched fatty acids besides straight-chain fatty acids.                                                                                            | 2.3.1.41  |
| KAS13       | b-ketoacyl synthetase (octadecanoate)      | ((BT_0122 and BT_3358) or (BT_3358 and BT_3834)) | Glycerophospholipid Metabolism | Evidence from literature | PMID:6102980, PMID:7440508, PMID:7204330, PMID:19460428                                                | <i>B. thetaiotaomicron</i> is well known to produce iso- and anteiso-branched fatty acids besides straight-chain fatty acids.                                                                                            | 2.3.1.41  |
| KAS2        | b-ketoacyl synthetase (n-C14:0)            | ((BT_0122 and BT_3358) or (BT_3358 and BT_3834)) | Glycerophospholipid Metabolism | Evidence from literature | PMID:6102980, PMID:7440508, PMID:7204330, PMID:19460428                                                | <i>B. thetaiotaomicron</i> is well known to produce iso- and anteiso-branched fatty acids besides straight-chain fatty acids.                                                                                            | 2.3.1.41  |

| BIGG Rxn ID        | Function                                                   | GPR                                                                         | Subsystem                                | Reason for addition                           | Reference                                               | Notes                                                                                                                                                                                                       | EC Number        |
|--------------------|------------------------------------------------------------|-----------------------------------------------------------------------------|------------------------------------------|-----------------------------------------------|---------------------------------------------------------|-------------------------------------------------------------------------------------------------------------------------------------------------------------------------------------------------------------|------------------|
| KAS3               | b-ketoacyl synthetase (Iso-C15:0)                          | ((BT_0122 and BT_3358) or (BT_3358 and BT_3834))                            | Glycerophospholipid Metabolism           | Evidence from literature                      | PMID:6102980, PMID:7440508, PMID:7204330, PMID:19460428 | <i>B. thetaiotaomicron</i> is well known to produce iso- and anteiso-branched fatty acids besides straight-chain fatty acids.                                                                               | 2.3.1.41         |
| KAS4               | b-ketoacyl synthetase (Anteiso-C15:0)                      | ((BT_0122 and BT_3358) or (BT_3358 and BT_3834))                            | Glycerophospholipid Metabolism           | Evidence from literature                      | PMID:6102980, PMID:7440508, PMID:7204330, PMID:19460428 | <i>B. thetaiotaomicron</i> is well known to produce iso- and anteiso-branched fatty acids besides straight-chain fatty acids.                                                                               | 2.3.1.41         |
| KAS6               | b-ketoacyl synthetase (Iso-C16:0)                          | ((BT_0122 and BT_3358) or (BT_3358 and BT_3834))                            | Glycerophospholipid Metabolism           | Evidence from literature                      | PMID:6102980, PMID:7440508, PMID:7204330, PMID:19460428 | <i>B. thetaiotaomicron</i> is well known to produce iso- and anteiso-branched fatty acids besides straight-chain fatty acids.                                                                               | 2.3.1.41         |
| KAS8               | b-ketoacyl synthetase (palmitate, n-C16:0)                 | ((BT_0122 and BT_3358) or (BT_3358 and BT_3834))                            | Glycerophospholipid Metabolism           | Evidence from literature                      | PMID:6102980, PMID:7440508, PMID:7204330, PMID:19460428 | <i>B. thetaiotaomicron</i> is well known to produce iso- and anteiso-branched fatty acids besides straight-chain fatty acids.                                                                               | 2.3.1.41         |
| KDNH               | 2-keto-3deoxy-D-glycero-D-galactonic acid phosphohydrolase | BT_1713                                                                     | Capsular Polysaccharide Biosynthesis     | Evidence from literature                      | PMID:18804026                                           | <i>B. thetaiotaomicron</i> forms and cytidylates 2-keto-3-deoxy-D-glycero-D-galacto-nononic acid (KDN), most likely for inclusion in its capsular polysaccharides.                                          |                  |
| KDOCT2             | 3-deoxy-manno-octulosonate cytidyltransferase              | BT_0745                                                                     | Lipopolysaccharide Biosynthesis          | Manually added gene annotation from databases |                                                         |                                                                                                                                                                                                             | 3.6.1.1, T3.A.10 |
| KDUI               | 5-keto-4-deoxyuronate isomerase                            | (BT_3231 or BT_4106)                                                        | Pentose and Glucuronate Interconversions | Manually added gene annotation from databases |                                                         | Added based on annotation from KEGG Pathway                                                                                                                                                                 | 5.3.1.17         |
| KESTOASEe          | Beta-2-1 fructan degradation, extracellular                | (BT_1759 or BT_3082)                                                        | Plant Polysaccharide Degradation         | Evidence from literature                      | PMID:20603004                                           | <i>B. thetaiotaomicron</i> grows well on short chain beta-2-1 fructans.                                                                                                                                     |                  |
| KESTOPTASEe        | Beta-2-1 fructan degradation, extracellular                | (BT_1759 or BT_3082)                                                        | Plant Polysaccharide Degradation         | Evidence from literature                      | PMID:20603004                                           | <i>B. thetaiotaomicron</i> grows well on short chain beta-2-1 fructans.                                                                                                                                     |                  |
| KESTOTTRASEe       | Beta-2-1 fructan degradation, extracellular                | (BT_1759 or BT_3082)                                                        | Plant Polysaccharide Degradation         | Evidence from literature                      | PMID:20603004                                           | <i>B. thetaiotaomicron</i> grows well on short chain beta-2-1 fructans.                                                                                                                                     |                  |
| LACDFUCTTR_FUCASEe | alpha-fucosidase, Lactodifucotetraose (extracellular)      | ((BT_1625 or BT_4136) and ((BT_4134 and BT_4135) or (BT_1630 and BT_1631))) | HMO Degradation                          | Evidence from literature                      | PMID: 22036470                                          | <i>B. thetaiotaomicron</i> grows on human milk oligosaccharides (HMOs); numerous glycosidase hydrolases are upregulated during growth on HMOs. Involves alpha-fucosidase and susC/ SusD (binding proteins). |                  |

| <b>BIGG Rxn ID</b> | <b>Function</b>                                                                               | <b>GPR</b>                                                                                                                                                                                                                                                                                                                                                    | <b>Subsystem</b>            | <b>Reason for addition</b> | <b>Reference</b> | <b>Notes</b>                                                                                                                                                                                                                               | <b>EC Number</b> |
|--------------------|-----------------------------------------------------------------------------------------------|---------------------------------------------------------------------------------------------------------------------------------------------------------------------------------------------------------------------------------------------------------------------------------------------------------------------------------------------------------------|-----------------------------|----------------------------|------------------|--------------------------------------------------------------------------------------------------------------------------------------------------------------------------------------------------------------------------------------------|------------------|
| LACNDFUCHX_FUCASEe | alpha-fucosidase, Lacto-N-difucohexaose (extracellular)                                       | ((BT_1625 or BT_4136) and ((BT_4134 and BT_4135) or (BT_1630 and BT_1631)))                                                                                                                                                                                                                                                                                   | HMO Degradation             | Evidence from literature   | PMID: 22036470   | B. thetaiotaomicron grows on human milk oligosaccharides (HMOs); numerous glycosidase hydrolases are upregulated during growth on HMOs. Involves alpha-fucosidase and susC/ SusD (binding proteins).                                       |                  |
| LACNFUCPT_FUCASEe  | alpha-fucosidase, Lacto-N-fucopentaose (extracellular)                                        | ((BT_1625 or BT_4136) and ((BT_4134 and BT_4135) or (BT_1630 and BT_1631)))                                                                                                                                                                                                                                                                                   | HMO Degradation             | Evidence from literature   | PMID: 22036470   | B. thetaiotaomicron grows on human milk oligosaccharides (HMOs); numerous glycosidase hydrolases are upregulated during growth on HMOs. Involves alpha-fucosidase and susC/ SusD (binding proteins).                                       |                  |
| LACNTTR_DEGe       | Lacto-N-tetraose degradation by beta-galactosidase and N-acetylglucosaminidase, extracellular | ((BT_1626 or BT_0461) and (BT_1627 or BT_1632 or BT_4132 or BT_0459 or BT_0460 or BT_1038 or BT_1044 or BT_1048 or BT_1051 or BT_4295 or BT_2825) and ((BT_1630 and BT_1631) or (BT_4134 and BT_4135) or (BT_1039 and BT_1040) or (BT_1042 and BT_1043) or (BT_1046 and BT_1047) or (BT_4297 and BT_4298) or (BT_2818 and BT_2819) or (BT_2820 and BT_2821))) | HMO Degradation             | Evidence from literature   | MID: 22036470    | Growth on this human milk oligosaccharide is very slow and inefficient, but detectable. No information on growth on Lacto-N-neotetraose is available. Involves beta-galactosidase, N-acetylglucosaminidase, susC, susD (binding proteins). |                  |
| LACZe              | b-galactosidase, extracellular                                                                | (BT_1626 or BT_4050)                                                                                                                                                                                                                                                                                                                                          | Alternate Carbon Metabolism | Evidence from literature   | PMID:16968696    | Genes are upregulated in the presence of lactose from mothers milk.                                                                                                                                                                        | 3.2.1.23         |

| BIGG Rxn ID | Function                                                                 | GPR                                                                                               | Subsystem                   | Reason for addition                           | Reference     | Notes                                                                                                                                                                                                                                                                                                  | EC Number |
|-------------|--------------------------------------------------------------------------|---------------------------------------------------------------------------------------------------|-----------------------------|-----------------------------------------------|---------------|--------------------------------------------------------------------------------------------------------------------------------------------------------------------------------------------------------------------------------------------------------------------------------------------------------|-----------|
| LCAR2       | Lactaldehyde reductase (glycolaldehyde)                                  | BT_3767                                                                                           | Alternate Carbon Metabolism | Evidence from literature                      | PMID:3308886  | Lactaldehyde dehydrogenase accepts glycolaldehyde as substrate (also shown in KEGG Pathway).                                                                                                                                                                                                           | 1.1.1.77  |
| LDH_L       | L-lactate dehydrogenase                                                  | (BT_4455 and BT_4456 and BT_4457)                                                                 | Central Metabolism          | Evidence from literature                      | PMID:148460   | Gene annotation was proposed by The SEED Viewer, however, the reaction was not included in the draft model generated by Model SEED. No other genome database confirms this annotation. However, L-lactate dehydrogenase was demonstrated in the closely related organism <i>Bacteroides fragilis</i> . | 1.1.1.27  |
| LEUGLY1c    | Hydrolysis of L-Leucylglycine                                            | (BT_3464 or BT_3926 or BT_3996 or BT_0149 or BT_4193 or BT_3254 or BT_1260 or BT_1261 or BT_1314) | Peptide Degradation         | Manually added gene annotation from databases |               |                                                                                                                                                                                                                                                                                                        |           |
| LEUGLYLAPe  | hydrolysis of Leucylglycine by predicted non-cytosolic leucine peptidase | BT_2548                                                                                           | Peptide Degradation         | Evidence from literature                      | PMID:12663928 | Predicted non-cytosolic by Xu et al. (2003): "A Genomic View of the Human-B. thetaiotaomicron Symbiosis.". Assumed to be extracellular for modeling purposes.                                                                                                                                          |           |
| LEUGLYt     | L-Leucylglycine transport via proton symport                             | (BT_0580 or BT_4385 or BT_1086)                                                                   | Transport, Extracellular    | Manually added gene annotation from databases |               | Genes added based on TransportDB (last consulted 06.06.12).                                                                                                                                                                                                                                            |           |
| LEULEU1c    | Hydrolysis of L-leucyl-L-leucine                                         | (BT_3464 or BT_3926 or BT_3996 or BT_0149 or BT_4193 or BT_3254 or BT_1260 or BT_1261 or BT_1314) | Peptide Degradation         | Manually added gene annotation from databases |               |                                                                                                                                                                                                                                                                                                        |           |

| BIGG Rxn ID | Function                                                                 | GPR                             | Subsystem                                  | Reason for addition                           | Reference                                                                                                                                          | Notes                                                                                                                                                                                                                                                                                                                                                                                                                                                                                                            | EC Number |
|-------------|--------------------------------------------------------------------------|---------------------------------|--------------------------------------------|-----------------------------------------------|----------------------------------------------------------------------------------------------------------------------------------------------------|------------------------------------------------------------------------------------------------------------------------------------------------------------------------------------------------------------------------------------------------------------------------------------------------------------------------------------------------------------------------------------------------------------------------------------------------------------------------------------------------------------------|-----------|
| LEULEULAPe  | hydrolysis of Leucylleucine by predicted non-cytosolic leucine peptidase | BT_2548                         | Peptide Degradation                        | Evidence from literature                      | PMID:12663928                                                                                                                                      | Predicted non-cytosolic by Xu et al. (2003): "A Genomic View of the Human- <i>B. thetaiotaomicron</i> Symbiosis.". Assumed to be extracellular for modeling purposes.                                                                                                                                                                                                                                                                                                                                            | 3.4.11.15 |
| LEULEUt     | L-leucyl-L-leucine transport via proton symport                          | (BT_0580 or BT_4385 or BT_1086) | Transport, Extracellular                   | Manually added gene annotation from databases |                                                                                                                                                    | Genes added based on TransportDB (last consulted 06.06.12).                                                                                                                                                                                                                                                                                                                                                                                                                                                      |           |
| LEUO        | Leucine oxidation by gut bacteria                                        |                                 | Valine, Leucine, and Isoleucine Metabolism | Evidence from literature                      | PMID:1541601, PMID:3572204, PMID:16887608, Krieg, N. R. (2010). Bergey's manual of systematic bacteriology, 2nd ed., volume 4. New York, Springer. | Valine and leucine are oxidized by gut bacteria to BCFA (branched-chain fatty acids) with one less carbon atom (isobutyrate and isovalerate, respectively), CO2 and ammonia. Isocaproate is also formed in the large intestine by reduction of leucine. This reaction formula is hypothetical, no information on exact pathway and involved enzymes is available. KEGG does not provide any pathway information either. Isobutyrate and isovalerate are known secretion products of <i>B. thetaiotaomicron</i> . |           |
| LEUt2r      | L-leucine reversible transport via proton symport                        |                                 | Transport, Extracellular                   | Evidence from literature                      | PMID:7462155                                                                                                                                       | <i>B. thetaiotaomicron</i> incorporates leucine, valine and isoleucine into its phospholipids, which suggests the presence of a transporter.                                                                                                                                                                                                                                                                                                                                                                     |           |
| LEVANASE_1e | Extracellular levanase                                                   | BT_1760                         | Plant Polysaccharide Degradation           | Evidence from literature                      | PMID:20603004                                                                                                                                      | <i>B. thetaiotaomicron</i> utilizes levan from hosts diet as carbon source.                                                                                                                                                                                                                                                                                                                                                                                                                                      | 3.2.1.65  |
| LEVANASE_2e | Extracellular levanase                                                   | (BT_1759 or BT_3082 or BT_1760) | Plant Polysaccharide Degradation           | Evidence from literature                      | PMID:20603004                                                                                                                                      | <i>B. thetaiotaomicron</i> utilizes levanoligosaccharides.                                                                                                                                                                                                                                                                                                                                                                                                                                                       | 3.2.1.65  |
| LEVANASE_3e | Extracellular levanase                                                   | (BT_1759 or BT_3082 or BT_1760) | Plant Polysaccharide Degradation           | Evidence from literature                      | PMID:20603004                                                                                                                                      | <i>B. thetaiotaomicron</i> utilizes levanoligosaccharides.                                                                                                                                                                                                                                                                                                                                                                                                                                                       | 3.2.1.65  |
| LEVANASE_4e | Extracellular levanase                                                   | (BT_1759 or BT_3082 or BT_1760) | Plant Polysaccharide Degradation           | Evidence from literature                      | PMID:20603004                                                                                                                                      | <i>B. thetaiotaomicron</i> utilizes levanoligosaccharides.                                                                                                                                                                                                                                                                                                                                                                                                                                                       | 3.2.1.65  |
| LEVANB_ABC  | levanbiose transport                                                     |                                 | Plant Polysaccharide Degradation           | Evidence from literature                      | PMID:20603004                                                                                                                                      | <i>B. thetaiotaomicron</i> has an intracellular levanbiose-degrading fructanase, therefore presence of a transport reaction is assumed.                                                                                                                                                                                                                                                                                                                                                                          |           |

| BIGG Rxn ID | Function                                                        | GPR                             | Subsystem                        | Reason for addition                           | Reference                                                           | Notes                                                                                                                                                                                                                                                                                 | EC Number |
|-------------|-----------------------------------------------------------------|---------------------------------|----------------------------------|-----------------------------------------------|---------------------------------------------------------------------|---------------------------------------------------------------------------------------------------------------------------------------------------------------------------------------------------------------------------------------------------------------------------------------|-----------|
| LMN2e       | laminaribiase (extracellular)                                   | (BT_2550 or BT_2824 or BT_3683) | Plant Polysaccharide Degradation | Evidence from literature                      | PMID:879772, PMID:9178362                                           | <i>B. thetaiotaomicron</i> grows on laminaran, products are laminaribiose and glucose.                                                                                                                                                                                                | 3.2.1.6   |
| LMNe        | Laminarinase (extracellular)                                    | (BT_2550 or BT_2824 or BT_3683) | Plant Polysaccharide Degradation | Evidence from literature                      | PMID:879772, PMID:9178362                                           | <i>B. thetaiotaomicron</i> grows on laminaran, products are laminaribiose and glucose.                                                                                                                                                                                                | 3.2.1.6   |
| LPADSS_BT   | lipidA_bt disaccaride synthase                                  | BT_4004                         | Lipopolysaccharide Biosynthesis  | Evidence from literature                      | PMID:18931137, PMID:19460428, PMID:20974832                         | Based on <i>H. pylori</i> LPS biosynthesis (BIGG database), as in the <i>P. gingivalis</i> reconstruction (PMID:18931137). <i>P. gingivalis</i> LPS is similar in structure to the <i>Bacteroides</i> LPS. Based on structural information taken from (PMID:19460428, PMID:20974832). | 2.4.1.182 |
| LPS_BTabc   | Lipopolysaccharide transport out via ABC system                 |                                 | Transport, Extracellular         | Evidence from literature                      | PMID:18931137, PMID:19460428, PMID:20974832                         | Based on <i>H. pylori</i> LPS biosynthesis (BIGG database), as in the <i>P. gingivalis</i> reconstruction (PMID:18931137). <i>P. gingivalis</i> LPS is similar in structure to the <i>Bacteroides</i> LPS.                                                                            |           |
| LPSSYN_BT   | Formation for LPS from Core oligosaccharide-Lipid A and O-chain |                                 | Lipopolysaccharide Biosynthesis  | Evidence from literature                      | PMID:18931137, PMID:19460428, PMID:20974832. See also PMID:15774760 | Based on <i>H. pylori</i> LPS biosynthesis (BIGG database), as in the <i>P. gingivalis</i> reconstruction (PMID:18931137). <i>P. gingivalis</i> LPS is similar in structure to the <i>Bacteroides</i> LPS. Based on structural information taken from (PMID:19460428, PMID:20974832). |           |
| LYSDC       | lysine decarboxylase                                            | BT_3307                         | Threonine and Lysine Metabolism  | Manually added gene annotation from databases |                                                                     | Added based on annotation from KEGG Pathway                                                                                                                                                                                                                                           | 4.1.1.18  |
| MALCOACD    | Malonyl-CoA condensation catalyzed by FabH                      | (BT_0122 or BT_3834)            | Biotin Metabolism                | Evidence from literature                      | PMID:20693992                                                       | Based on biotin synthesis described in PMID:20693992 for <i>E. coli</i> .                                                                                                                                                                                                             |           |
| MALCOAMT    | Malonyl-CoA methyltransferase BioC                              | BT_1445                         | Biotin Metabolism                | Evidence from literature                      | PMID:20693992                                                       | Based on biotin synthesis described in PMID:20693992 for <i>E. coli</i> . Malonyl-CoA is considered the most likely substrate.                                                                                                                                                        |           |
| MALTe       | alpha-glucosidase, extracellular                                | (BT_3704 or BT_3703)            | Plant Polysaccharide Degradation | Evidence from literature                      | PMID:18981178, PMID:18611383, PMID:10986238                         | The starch and maltooligosaccharide utilization system of <i>B. thetaiotaomicron</i> is well characterized.                                                                                                                                                                           | 3.2.1.20  |

| BIGG Rxn ID | Function                                             | GPR                                                   | Subsystem                        | Reason for addition                           | Reference      | Notes                                                                                                                                                       | EC Number |
|-------------|------------------------------------------------------|-------------------------------------------------------|----------------------------------|-----------------------------------------------|----------------|-------------------------------------------------------------------------------------------------------------------------------------------------------------|-----------|
| MALt2r      | maltose transport in via proton symport reversible   |                                                       | Transport, Extracellular         | Evidence from literature                      | PMID: 10986238 | <i>B. thetaiotaomicron</i> grows on maltose.                                                                                                                |           |
| MANA1e      | beta-mannosidase, mannobiose degradation             | (BT_0458 or BT_2855 or BT_4074 or BT_2432 or BT_3599) | Plant Polysaccharide Degradation | Evidence from literature                      | PMID:17287210  | BT_0458 gene product was purified and characterized. Shown to have high activity on mannobiose and especially mannotriose, mannotetraose and mannopentaose. | 3.2.1.25  |
| MANA2e      | beta-mannosidase, mannotriose degradation            | (BT_0458 or BT_2855 or BT_4074 or BT_2432 or BT_3599) | Plant Polysaccharide Degradation | Evidence from literature                      | PMID:17287210  | BT_0458 gene product was purified and characterized. Shown to have high activity on mannobiose and especially mannotriose, mannotetraose and mannopentaose. | 3.2.1.25  |
| MANA3e      | beta-mannosidase, mannotetraose degradation          | (BT_0458 or BT_2855 or BT_4074 or BT_2432 or BT_3599) | Plant Polysaccharide Degradation | Evidence from literature                      | PMID:17287210  | BT_0458 gene product was purified and characterized. Shown to have high activity on mannobiose and especially mannotriose, mannotetraose and mannopentaose. | 3.2.1.25  |
| MANA4e      | beta-mannosidase, mannopentaose degradation          | (BT_0458 or BT_2855 or BT_4074 or BT_2432 or BT_3599) | Plant Polysaccharide Degradation | Evidence from literature                      | PMID:17287210  | BT_0458 gene product was purified and characterized. Shown to have high activity on mannobiose and especially mannotriose, mannotetraose and mannopentaose. | 3.2.1.25  |
| MANabc      | mannose transport via ABC transporter                | BT_1536                                               | Transport, Extracellular         | Evidence from literature                      | PMID: 22205877 | <i>B. thetaiotaomicron</i> grows on mannose and alpha-mannan. The ABC transporter BT_1536 is upregulated during growth on alpha-mannan.                     |           |
| MANt2r      | D-mannose transport in via proton symport reversible |                                                       | Transport, Extracellular         | Evidence from literature                      | PMID: 16887504 | GPR is not not known, but <i>B. thetaiotaomicron</i> was demonstrated to grow on mannose as sole carbon source.                                             |           |
| MANTRabc    | mannotriose transport via ABC transporter            |                                                       | Transport, Extracellular         | Evidence from literature                      | PMID:17287210  | <i>B. thetaiotaomicron</i> grows on mannotriose.                                                                                                            |           |
| MELIBabc    | melibiose transport via ABC system (import)          |                                                       | Transport, Extracellular         | Evidence from literature                      | PMID:2557798   | <i>B. thetaiotaomicron</i> grows on melibiose.                                                                                                              |           |
| MEOHt2      | Methanol diffusion                                   |                                                       | Transport, Extracellular         | Evidence from literature                      | PMID:20693992  | Biotin synthesis pathway as proposed by PMID:20693992 produces methanol.                                                                                    |           |
| METALat     | L-methionyl-L-alanine transport via proton symport   | (BT_0580 or BT_4385 or BT_1086)                       | Transport, Extracellular         | Manually added gene annotation from databases |                | Genes added based on TransportDB (last consulted 06.06.12).                                                                                                 | 4.2.99.9  |

| BIGG Rxn ID | Function                                              | GPR                  | Subsystem                        | Reason for addition      | Reference                                                 | Notes                                                                                                                                                                                                                           | EC Number |
|-------------|-------------------------------------------------------|----------------------|----------------------------------|--------------------------|-----------------------------------------------------------|---------------------------------------------------------------------------------------------------------------------------------------------------------------------------------------------------------------------------------|-----------|
| METOX1s     | methionine oxidation (spontaneous)                    |                      | Methionine Metabolism            | Based on BIGG database   |                                                           |                                                                                                                                                                                                                                 |           |
| METt2r      | L-methionine reversible transport via proton symport  | BT_1270              | Transport, Extracellular         | Evidence from literature | PMID:10867063                                             | Gut microbiota contribute to host amino acid homeostasis. Methionine is an essential amino acid for humans. This annotation (Methionine transporter MetT) is only supported by The SEED.                                        |           |
| MK10t       | Menaquinone secretion/uptake (menaquinone 10)         |                      | Transport, Extracellular         | Evidence from literature | PMID: 18841274                                            | Gut microbiota, in particular Bacteroides, produce menaquinone, which contributes to host vitamin K homeostasis. AH                                                                                                             |           |
| MK11t       | Menaquinone secretion/uptake (menaquinone 11)         |                      | Transport, Extracellular         | Evidence from literature | PMID: 18841274                                            | Gut microbiota, in particular Bacteroides, produce menaquinone, which contributes to host vitamin K homeostasis. AH                                                                                                             |           |
| MK7t        | Menaquinone secretion/uptake (menaquinone 7)          |                      | Transport, Extracellular         | Evidence from literature | PMID: 18841274                                            | Gut microbiota, in particular Bacteroides, produce menaquinone, which contributes to host vitamin K homeostasis. AH                                                                                                             |           |
| MK8t        | Menaquinone secretion/uptake (menaquinone 8)          |                      | Transport, Extracellular         | Evidence from literature | PMID: 18841274                                            | Gut microbiota, in particular Bacteroides, produce menaquinone, which contributes to host vitamin K homeostasis. AH                                                                                                             |           |
| MK9t        | Menaquinone secretion/uptake (menaquinone 9)          |                      | Transport, Extracellular         | Evidence from literature | PMID: 18841274                                            | Gut microbiota, in particular Bacteroides, produce menaquinone, which contributes to host vitamin K homeostasis. AH                                                                                                             |           |
| MLTG1       | Maltodextrin glucosidase (maltotriose)                | BT_4690              | Plant Polysaccharide Degradation | Evidence from literature | PMID:848954                                               | Added based on annotation from NCBI Gene. There may also be other cytoplasmatic enzymes carrying out this reaction. The starch and maltooligosaccharide utilization system of <i>B. thetaiotaomicron</i> is well characterized. | 3.2.1.1   |
| MLTG1e      | Maltodextrin glucosidase (maltotriose), extracellular | (BT_3703 or BT_3704) | Plant Polysaccharide Degradation | Evidence from literature | PMID:10986238, PMID:2722747, PMID:18981178, PMID:18611383 | The starch and maltooligosaccharide utilization system of <i>B. thetaiotaomicron</i> is well characterized.                                                                                                                     | 3.2.1.1   |

| BIGG Rxn ID | Function                                                | GPR                                                                                                           | Subsystem                        | Reason for addition      | Reference                                                                | Notes                                                                                                                                                                                                                           | EC Number |
|-------------|---------------------------------------------------------|---------------------------------------------------------------------------------------------------------------|----------------------------------|--------------------------|--------------------------------------------------------------------------|---------------------------------------------------------------------------------------------------------------------------------------------------------------------------------------------------------------------------------|-----------|
| MLTG2       | Maltodextrin glucosidase (maltotetraose)                | BT_4690                                                                                                       | Plant Polysaccharide Degradation | Evidence from literature | PMID:848954                                                              | Added based on annotation from NCBI Gene. There may also be other cytoplasmatic enzymes carrying out this reaction. The starch and maltooligosaccharide utilization system of <i>B. thetaiotaomicron</i> is well characterized. | 3.2.1.1   |
| MLTG2e      | Maltodextrin glucosidase (maltotetraose), extracellular | (BT_3703 or BT_3704)                                                                                          | Plant Polysaccharide Degradation | Evidence from literature | PMID: 18981178, PMID:18611383                                            | The starch and maltooligosaccharide utilization system of <i>B. thetaiotaomicron</i> is well characterized.                                                                                                                     | 3.2.1.1   |
| MLTG3       | Maltodextrin glucosidase (maltopentaose)                | BT_4690                                                                                                       | Plant Polysaccharide Degradation | Evidence from literature | PMID:848954                                                              | Added based on annotation from NCBI Gene. There may also be other cytoplasmatic enzymes carrying out this reaction. The starch and maltooligosaccharide utilization system of <i>B. thetaiotaomicron</i> is well characterized. | 3.2.1.1   |
| MLTG3e      | Maltodextrin glucosidase (maltopentaose), extracellular | (BT_3703 or BT_3704)                                                                                          | Plant Polysaccharide Degradation | Evidence from literature | PMID: 18981178, PMID:18611383                                            | The starch and maltooligosaccharide utilization system of <i>B. thetaiotaomicron</i> is well characterized.                                                                                                                     | 3.2.1.1   |
| MLTG4       | Maltodextrin glucosidase (maltohexaose)                 | BT_4690                                                                                                       | Plant Polysaccharide Degradation | Evidence from literature | PMID:848954                                                              | Added based on annotation from NCBI Gene. There may also be other cytoplasmatic enzymes carrying out this reaction. The starch and maltooligosaccharide utilization system of <i>B. thetaiotaomicron</i> is well characterized. | 3.2.1.1   |
| MLTG4e      | Maltodextrin glucosidase (maltohexaose), extracellular  | ((BT_3698 and BT_3701 and BT_3702) or (BT_0773 and BT_3701 and BT_3702) or (BT_4305 and BT_3701 and BT_3702)) | Plant Polysaccharide Degradation | Evidence from literature | PMID:10986238, PMID:2722747, PMID:8955399, PMID: 18981178, PMID:18611383 | The starch and maltooligosaccharide utilization system of <i>B. thetaiotaomicron</i> is well characterized.                                                                                                                     | 3.2.1.1   |

| BIGG Rxn ID | Function                                                | GPR                                                                                                                                                                 | Subsystem                        | Reason for addition      | Reference                                                               | Notes                                                                                                                                                                                                                                                                                 | EC Number |
|-------------|---------------------------------------------------------|---------------------------------------------------------------------------------------------------------------------------------------------------------------------|----------------------------------|--------------------------|-------------------------------------------------------------------------|---------------------------------------------------------------------------------------------------------------------------------------------------------------------------------------------------------------------------------------------------------------------------------------|-----------|
| MLTG5       | Maltodextrin glucosidase (maltoheptaose)                | BT_4690                                                                                                                                                             | Plant Polysaccharide Degradation | Evidence from literature | PMID:848954                                                             | Added based on annotation from NCBI Gene. There may also be other cytoplasmatic enzymes carrying out this reaction. The starch and maltooligosaccharide utilization system of <i>B. thetaiotaomicron</i> is well characterized.                                                       | 3.2.1.1   |
| MLTG5e      | Maltodextrin glucosidase (maltoheptaose), extracellular | ((BT_3698 and BT_3701 and BT_3702) or (BT_0773 and BT_3701 and BT_3702) or (BT_4305 and BT_3701 and BT_3702))                                                       | Plant Polysaccharide Degradation | Evidence from literature | PMID:10986238, PMID:2722747, PMID:8955399, PMID:18981178, PMID:18611383 | The starch and maltooligosaccharide utilization system of <i>B. thetaiotaomicron</i> is well characterized.                                                                                                                                                                           | 3.2.1.1   |
| MOAT_BT     | 3-deoxy-D-manno-octulosonic acid transferase            | BT_2747                                                                                                                                                             | Lipopolysaccharide Biosynthesis  | Evidence from literature | PMID:18931137, PMID:19460428, PMID:20974832                             | Based on <i>H. pylori</i> LPS biosynthesis (BIGG database), as in the <i>P. gingivalis</i> reconstruction (PMID:18931137). <i>P. gingivalis</i> LPS is similar in structure to the <i>Bacteroides</i> LPS. Based on structural information taken from (PMID:19460428, PMID:20974832). | 2.4.99.12 |
| MTHGXLt     | Methylglyoxal transport (cytosol to extracellular)      |                                                                                                                                                                     | Transport, Extracellular         | Evidence from literature | PMID:11260473                                                           | <i>B. thetaiotaomicron</i> produces weak amounts of methylglyoxal.                                                                                                                                                                                                                    |           |
| NACHEX27e   | beta-N-acetylhexosaminidase, hyaluronan degradation     | (BT_4394 or BT_4395 or BT_4337 or BT_3598 or BT_1627 or BT_3868 or BT_0459 or BT_0460 or BT_0506 or BT_4681 or BT_1621 or BT_3178 or BT_0456 or BT_1051 or BT_2459) | Glycosaminoglycan Degradation    | Evidence from literature | PMID:16565725, PMID:20689974, PMID:848954                               | BT_4395 gene product was purified and characterized. <i>B. thetaiotaomicron</i> ferments hyaluronan.                                                                                                                                                                                  | 3.2.1.52  |

| BIGG Rxn ID      | Function                                             | GPR                                                                                                                                              | Subsystem                                        | Reason for addition                                                           | Reference                                                                                                                                                                   | Notes                                                                                                                                                                                                                                                                                                                                                                  | EC Number |
|------------------|------------------------------------------------------|--------------------------------------------------------------------------------------------------------------------------------------------------|--------------------------------------------------|-------------------------------------------------------------------------------|-----------------------------------------------------------------------------------------------------------------------------------------------------------------------------|------------------------------------------------------------------------------------------------------------------------------------------------------------------------------------------------------------------------------------------------------------------------------------------------------------------------------------------------------------------------|-----------|
| NACt             | Nicotinate secretion/<br>uptake                      |                                                                                                                                                  | Transport,<br>Extracellular                      | Evidence from<br>literature                                                   | PMID: 19748469                                                                                                                                                              | B. thetaiotaomicron mutants in NAD biosynthesis are not essential in vitro on tryptone-yeast extract-glucose medium, suggesting that B. thetaiotaomicron can uptake nicotinate from yeast extract.                                                                                                                                                                     |           |
| NADDP            | NAD diphosphatase                                    | BT_1544                                                                                                                                          | Cofactor and<br>Prosthetic Group<br>Biosynthesis | Manually added gene<br>annotation from<br>databases                           |                                                                                                                                                                             | Added based on KEGG Pathway                                                                                                                                                                                                                                                                                                                                            | 3.6.1.22  |
| NADH17           | NADH dehydrogenase<br>(menaquinone-8 & 3<br>protons) | (BT_4058 and<br>BT_4059 and<br>BT_4060 and<br>BT_4061 and<br>BT_4062 and<br>BT_4063 and<br>BT_4064 and<br>BT_4065 and<br>BT_4066 and<br>BT_4067) | Central Metabolism                               | Evidence from<br>literature, based on<br>existing metabolic<br>reconstruction | PMID:12777495                                                                                                                                                               | The reaction is linked to fumarate reductase. The exact stoichiometry is unknown, formula was putatively added based on <i>E. coli</i> iAF1260.                                                                                                                                                                                                                        | 1.6.5.3   |
| NARK             | Nitrite transport in                                 |                                                                                                                                                  | ROS Detoxification                               | Evidence from<br>literature                                                   | Dworkin, M. and S.<br>Falkow (2006). The<br>prokaryotes : a handbook<br>on the biology of<br>bacteria. New York ;<br>[London], Springer,<br>PMID:14665678,<br>PMID:16183308 | Nitrite appears to be produced from NH <sub>4</sub> by nitrite reductase (the reaction does not seem to go the other way since nitrite does not serve as nitrogen source). Nitrite does not react further to nitric oxide (or only in very slight amounts) (PMID:16183308). It is assumed that nitrite is transported out via diffusion through porin (PMID:14665678). |           |
| NBAHH_ir         | Nalpa-(beta-alanyl)-L-<br>histidine hydrolase IR     | (BT_4045 or<br>BT_1615)                                                                                                                          | Histidine Metabolism                             | Evidence from<br>literature                                                   | PMID:3543210                                                                                                                                                                | Added based on KEGG Pathway. <i>B. thetaiotaomicron</i> has weak proteolytic activity (cell-bound). The enzyme is possibly involved in degrading host-derived peptides.                                                                                                                                                                                                | 3.4.13.3  |
| NEULACNTTR_SIASe | sialidase, Sialyllacto-N-<br>tetraose                | BT_0455 or<br>BT_2194 or<br>BT_2892                                                                                                              | HMO Degradation                                  | Evidence from<br>literature                                                   | PMID: 22036470                                                                                                                                                              | B. thetaiotaomicron liberates sialic acid from human milk oligosaccharides, though it cannot use it. Lacto-N-tetraose is poorly metabolized and accumulates if BT is grown on HMOs.                                                                                                                                                                                    |           |
| NMNt2r           | NMN transport via proton<br>symport reversible       | BT_2396                                                                                                                                          | Transport,<br>Extracellular                      | Manually added gene<br>annotation from<br>databases                           |                                                                                                                                                                             | Annotation from NCBI Gene (last updated 01.01.11)                                                                                                                                                                                                                                                                                                                      |           |

| BIGG Rxn ID  | Function                                                            | GPR                                                                      | Subsystem                                          | Reason for addition                           | Reference                                                               | Notes                                                                                                                                                                                                                                                                                          | EC Number |
|--------------|---------------------------------------------------------------------|--------------------------------------------------------------------------|----------------------------------------------------|-----------------------------------------------|-------------------------------------------------------------------------|------------------------------------------------------------------------------------------------------------------------------------------------------------------------------------------------------------------------------------------------------------------------------------------------|-----------|
| O16G2e       | oligo-1,6-glucosidase (strch2 ->strch3), extracellular              | BT_3299                                                                  | Plant Polysaccharide Degradation                   | Evidence from literature                      | PMID:10986238, PMID:2722747, PMID:8955399, PMID:18981178, PMID:18611383 | Starch utilization by <i>B. thetaiotaomicron</i> as sole carbon source is well established.                                                                                                                                                                                                    | 3.2.1.10  |
| OGALURLe     | Oligogalacturonate lyase (extracellular)                            | (BT_4115 or BT_4116)                                                     | Plant Polysaccharide Degradation                   | Manual gapfilling                             | PMID:3968032                                                            | Oligogalacturonate lyase is not annotated in the <i>B. thetaiotaomicron</i> genome. Is assumed to also be carried out by pectate lyase to allow complete degradation of pectin.                                                                                                                | 4.2.2.6   |
| OIVD2        | 2-oxoisovalerate dehydrogenase (acylating; 3-methyl-2-oxobutanoate) |                                                                          | Valine, Leucine, and Isoleucine Metabolism         | Manual gapfilling                             |                                                                         | Manual_Gapfilling based on reactions OIVD1r and OIVD3 added by Model SEED. Required for lipid metabolism.                                                                                                                                                                                      | 1.2.1.25  |
| OLIGOFRUASEe | Oligofructose degradation by extracellular fructanase               | (BT_1759 or BT_3082)                                                     | Plant Polysaccharide Degradation                   | Evidence from literature                      | PMID:16461642, PMID:20603004                                            | <i>B. thetaiotaomicron</i> grows on the prebiotic oligofructose. Degradation is carried out by exo-acting periplasmatic fructosidases (extracellular for modeling purposes).                                                                                                                   |           |
| OORr         | 2-oxoglutarate synthase (reversible)                                | ((BT_0329 and BT_0330 and BT_0331 and BT_0333) or (BT_2836 and BT_2837)) | TCA Cycle                                          | Manual gapfilling                             | PMID: 533772, PMID:11880608                                             | Demonstrated for several <i>Bacteroides</i> species. Necessary for heme-dependent 2-oxoglutarate synthesis from oxaloacetate. OORr is an additional reaction catalyzed by 2-oxoglutarate synthase apart from OOR2r. Necessary to allow IOR2 to run. Not sure which form of ferredoxin is used. | 1.2.7.3   |
| ORNabc       | ornithine transport via ABC system                                  | BT_4049                                                                  | Transport, Extracellular                           | Manually added gene annotation from databases |                                                                         | Annotation from NCBI Gene (last updated 01.01.11)                                                                                                                                                                                                                                              |           |
| ORNTA        | ornithine transaminase                                              | BT_3758                                                                  | Arginine and Proline Metabolism                    | Evidence from literature                      | PMID:238949                                                             | Acetylornithine transaminase catalyzes the transamination of N-2-acetyl-L-ornithine (ACOTA) as well as of L-ornithine (this reaction) with 2-oxoglutarate.                                                                                                                                     | 2.6.1.13  |
| PACCOALr     | phenylacetate-CoA ligase                                            | (BT_0428 or BT_0571)                                                     | Tyrosine, Tryptophan, and Phenylalanine Metabolism | Evidence from literature                      | PMID:18396344, PMID:16887608                                            | <i>B. thetaiotaomicron</i> produces phenylacetate as a minor fermentation product (PMID:18396344). Phenylacetate is also formed in the gut from aromatic acid metabolism (PMID:16887608).                                                                                                      | 6.2.1.30  |

| <b>BIGG Rxn ID</b> | <b>Function</b>                                                   | <b>GPR</b> | <b>Subsystem</b>                           | <b>Reason for addition</b>                    | <b>Reference</b>                                                                        | <b>Notes</b>                                                                                                      | <b>EC Number</b> |
|--------------------|-------------------------------------------------------------------|------------|--------------------------------------------|-----------------------------------------------|-----------------------------------------------------------------------------------------|-------------------------------------------------------------------------------------------------------------------|------------------|
| PACt2r             | phenylacetate transport in via proton symporter                   |            | Transport, Extracellular                   | Evidence from literature                      | PMID:18396344                                                                           | <i>B. thetaiotaomicron</i> produces phenylacetate as a minor fermentation product during growth on carbohydrates. |                  |
| PANTS              | pantothenate synthase                                             | BT_4308    | Cofactor and Prosthetic Group Biosynthesis | Evidence from literature                      | PMID:4853401                                                                            | Annotation from KEGG Pathway. <i>B. thetaiotaomicron</i> does not require pantothenate.                           | 6.3.2.1          |
| PDHa               | pyruvate dehydrogenase (lipoamide)                                | BT_0311    | Glycolysis/Gluconeogenesis                 | Manually added gene annotation from databases |                                                                                         |                                                                                                                   |                  |
| PE_CER1_BTt        | Ceramide phosphoethanolamine (B.thetaiotaomicron specific) export |            | Sphingolipid Metabolism                    | Evidence from literature                      | PMID:16887518, PMID:20855611, Anaerobe (2001) 07, 103–112<br>doi:10.1006/anae.2001.0376 | <i>Bacteroides</i> species are well established to produce sphingolipids.                                         |                  |

| <b>BIGG Rxn ID</b> | <b>Function</b>                                                                               | <b>GPR</b>                                                                                                                                                                                                                                                                                                                                                                                                                                     | <b>Subsystem</b>                 | <b>Reason for addition</b> | <b>Reference</b> | <b>Notes</b>                                                                                                                                                                                                                                                                            | <b>EC Number</b> |
|--------------------|-----------------------------------------------------------------------------------------------|------------------------------------------------------------------------------------------------------------------------------------------------------------------------------------------------------------------------------------------------------------------------------------------------------------------------------------------------------------------------------------------------------------------------------------------------|----------------------------------|----------------------------|------------------|-----------------------------------------------------------------------------------------------------------------------------------------------------------------------------------------------------------------------------------------------------------------------------------------|------------------|
| PECTICGALASEe      | Pectic galactan (potato) degradation, extracellular                                           | ((BT_0348 or BT_0360 or BT_0367 or BT_0368 or BT_0369) and (BT_4667 or BT_4668 or BT_4152) and (BT_4146 or BT_4149 or BT_4153 or BT_4155 or BT_4160 or BT_4170 or BT_4183 or BT_4115 or BT_4116 or BT_4119 or BT_4123) and (BT_4150 or BT_4173) and BT_4175 and (BT_4109 or BT_4110) and ((BT_0361 and BT_0362) or (BT_0363 and BT_0364) or (BT_4670 and BT_4671) or (BT_4164 and BT_4165) or (BT_4113 and BT_4114) or (BT_4121 and BT_4122))) | Plant Polysaccharide Degradation | Evidence from literature   | PMID: 22205877   | B. thetaiotaomicron grows on pectic galactan. The genes included in the GPR are upregulated during growth. Enzymes/ proteins assumed to be involved: arabinosidase, galactosidase, galacturonisidase, rhamnogalactorunan esterase, rhamnogalacturonan lyase, pectinesterase, susC/ SusD |                  |
| PECTIN_DEG2e       | Pectin degradation by extracellular pectate lyase and pectinesterase, gut microbiota specific | ((BT_4115 or BT_4116) and BT_4110)                                                                                                                                                                                                                                                                                                                                                                                                             | Plant Polysaccharide Degradation | Evidence from literature   | PMID:3968032     | Purified and characterized by enzyme assay in B. thetaiotaomicron. Genome annotation from NCBI Gene. Appears to be located in periplasm (extracellular for modeling purposes).                                                                                                          |                  |

| BIGG Rxn ID | Function                                                                                              | GPR                                                                 | Subsystem                            | Reason for addition      | Reference                                                                            | Notes                                                                                                                                                                                                                     | EC Number |
|-------------|-------------------------------------------------------------------------------------------------------|---------------------------------------------------------------------|--------------------------------------|--------------------------|--------------------------------------------------------------------------------------|---------------------------------------------------------------------------------------------------------------------------------------------------------------------------------------------------------------------------|-----------|
| PECTIN_DEGe | Pectin degradation by extracellular endopolygalacturonase and pectinesterase, gut microbiota specific | ((BT_1018 or BT_2378 or BT_4123 or BT_4155 or BT_4187) and BT_4110) | Plant Polysaccharide Degradation     | Evidence from literature | PMID:3968032                                                                         | Purified and characterized by enzyme assay. Genome annotation from NCBI Gene. Appears to be located in periplasm (extracellular for modeling purposes).                                                                   |           |
| PECTLe      | Pectate lyase (extracellular)                                                                         | (BT_4115 or BT_4116)                                                | Plant Polysaccharide Degradation     | Evidence from literature | PMID:3968032                                                                         | Purified and characterized by enzyme assay. Genome annotation from NCBI Gene. Appears to be located in periplasm (extracellular for modeling purposes).                                                                   | 4.2.2.2   |
| PEPM        | phosphoenolpyruvate mutase                                                                            | BT_1720                                                             | Capsular Polysaccharide Biosynthesis | Evidence from literature | PMID:12904299                                                                        | PEPM, 3OPDC and 2AMEPHPAT form the biosynthetic pathway of 2-aminoethylphosphonate, a component of the capsular polysaccharide complex of <i>Bacteroides fragilis</i> , and most likely other <i>Bacteroides</i> species. | 5.4.2.9   |
| PEPT160     | ethanolamine phosphotransferase (n-C16:0)                                                             |                                                                     | Sphingolipid Metabolism              | Manual gapfilling        | PMID:16887518, PMID:20855611, Anaerobe (2001) 07, 103–112 doi:10.1006/anae.2001.0376 | Reaction required for sphingolipid synthesis. The pathway mechanism may be different.                                                                                                                                     |           |
| PGAMT       | phosphoglucosamine mutase                                                                             | BT_3950                                                             | Cell Envelope Biosynthesis           | Evidence from literature | PMID:18931137, PMID:19460428, PMID:20974832.                                         | Reaction is needed for LPS biosynthesis, based on <i>H. pylori</i> LPS biosynthesis (BIGG database). Annotation from The SEED.                                                                                            | 5.4.2.10  |
| PHCHGS      | L-1-Pyrroline-3-hydroxy-5-carboxylate spontaneous conversion to L-4-Hydroxyglutamate semialdehyde     |                                                                     | Arginine and Proline Metabolism      | Based on BIGG database   |                                                                                      | BIGG database suggests that this reaction occurs spontaneously.                                                                                                                                                           |           |
| PHEARG1c    | Hydrolysis of L-phenylalanyl-L-arginine                                                               | BT_1846                                                             | Peptide Degradation                  | Evidence from literature | PMID: 22628297                                                                       | B. thetaiotaomicron peptidase M49 was characterized and shown to hydrolyze Arg-Arg and Phe-Arg specifically.                                                                                                              | 3.2.1.31  |
| PHEARGt     | L-phenylalanyl-L-arginine transport via proton symport                                                | (BT_0580 or BT_4385 or BT_1086)                                     | Transport, Extracellular             | Evidence from literature | PMID: 22628297                                                                       | B. thetaiotaomicron peptidase M49 was characterized and shown to hydrolyze Arg-Arg and Phe-Arg specifically.                                                                                                              |           |

| BIGG Rxn ID | Function                                                        | GPR                                                                                                           | Subsystem                        | Reason for addition                           | Reference                                                               | Notes                                                                                                                                                                                                                               | EC Number |
|-------------|-----------------------------------------------------------------|---------------------------------------------------------------------------------------------------------------|----------------------------------|-----------------------------------------------|-------------------------------------------------------------------------|-------------------------------------------------------------------------------------------------------------------------------------------------------------------------------------------------------------------------------------|-----------|
| PMACPME     | Cleavage of ester from pimeloyl-ACP methyl ester (BioH)         |                                                                                                               | Biotin Metabolism                | Evidence from literature                      | PMID:20693992, PMID:4853401                                             | Based on biotin synthesis described in PMID:20693992 for <i>E. coli</i> . Gene is not known, but the gap was filled to complete biotin synthesis pathway (biotin is not required by <i>B. thetaiotaomicron</i> , see PMID:4853401). |           |
| PMANM       | phosphomannomutase                                              | (BT_3950 or BT_1548)                                                                                          | Alternate Carbon Metabolism      | Manually added gene annotation from databases |                                                                         | Based on annotation from NCBI Gene (last updated 21.05.11)                                                                                                                                                                          | 5.4.2.8   |
| PNTOr2      | Pantothenate reversible transport via proton symport            |                                                                                                               | Transport, Extracellular         | Evidence from literature                      | PMID: 19748469                                                          | <i>B. thetaiotaomicron</i> mutants in pantothenate biosynthesis are not essential in vitro on tryptone-yeast extract-glucose medium, suggesting that <i>B. thetaiotaomicron</i> can uptake pantothenate from yeast extract.         |           |
| PPAtr       | Propionate transport, diffusion                                 |                                                                                                               | Transport, Extracellular         | Evidence from literature                      | PMID:19321416, PMID:12740060                                            | <i>Bacteroides</i> species are well established to produce short-chain fatty acids (SCFAs).                                                                                                                                         |           |
| PPK2        | polyphosphate kinase                                            | (BT_0541 or BT_2019)                                                                                          | Central Metabolism               | Manually added gene annotation from databases |                                                                         | Added based on annotation from NCBI Gene.                                                                                                                                                                                           | 2.7.4.1   |
| PROGLYt     | L-prolylglycine transport via proton symport                    | (BT_0580 or BT_4385 or BT_1086)                                                                               | Transport, Extracellular         | Manually added gene annotation from databases |                                                                         | Genes added based on TransportDB (last consulted 06.06.12).                                                                                                                                                                         | 2.1.3.11  |
| PTRCtex2    | putrescine excretion (cytosol to extracellular)                 |                                                                                                               | Transport, Extracellular         | Evidence from literature                      | PMID:10801923                                                           | <i>B. thetaiotaomicron</i> secretes putrescine and spermidine.                                                                                                                                                                      |           |
| PULLe       | pullulane hydrolysis by alpha-1,6 pullulanase and alpha-amylase | ((BT_3698 and BT_3701 and BT_3702) or (BT_3701 and BT_3702 and BT_4689) or (BT_1663 and BT_3701 and BT_3702)) | Plant Polysaccharide Degradation | Evidence from literature                      | PMID:10986238, PMID:2722747, PMID:8955399, PMID:18981178, PMID:18611383 | The starch utilization system of <i>B. thetaiotaomicron</i> is well characterized.                                                                                                                                                  |           |
| PYDXNO      | pyridoxine oxidase                                              | BT_1577                                                                                                       | Vitamin B6 Metabolism            | Manually added gene annotation from databases |                                                                         |                                                                                                                                                                                                                                     | 1.4.3.5   |

| BIGG Rxn ID | Function                                         | GPR                   | Subsystem                       | Reason for addition                           | Reference                                   | Notes                                                                                                                                                                                                                                                                                       | EC Number |
|-------------|--------------------------------------------------|-----------------------|---------------------------------|-----------------------------------------------|---------------------------------------------|---------------------------------------------------------------------------------------------------------------------------------------------------------------------------------------------------------------------------------------------------------------------------------------------|-----------|
| PYDXNtr     | pyridoxine transport via diffusion               |                       | Transport, Extracellular        | Evidence from literature                      | PMID:894368, PMID:9167138, PMID:9562034     | It is well established that the gut microbiota produces B vitamins in mammals. Germ-free rats fed a pyridoxine-free diet suffer far more severe deficiency symptoms than conventional rats (PMID:894368). Pyridoxine transport by <i>B. thetaiotaomicron</i> is therefore assumed to occur. |           |
| PYDXO       | pyridoxal oxidase                                | BT_1577               | Vitamin B6 Metabolism           | Manually added gene annotation from databases |                                             |                                                                                                                                                                                                                                                                                             | 1.4.3.5   |
| PYRt2r      | pyruvate reversible transport via proton symport |                       | Transport, Extracellular        | Evidence from literature                      | PMID:11260473                               | No gene found, but <i>B. thetaiotaomicron</i> was shown to secrete pyruvate.                                                                                                                                                                                                                |           |
| QMO3        | quinol monooxygenase (menaquinol 8)              | (BT_3054 and BT_3055) | Central Metabolism              | Evidence from literature                      | PMID:7649986, PMID:11260473                 | The reaction seems to be carried out by fumarate reductase. When it is exposed to air, fumarate reductase generates oxygen free radicals through autooxidation. The electrons seem to pass from reduced menaquinone via Fe-S clusters and a flavin to oxygen.                               |           |
| RAFFabc     | raffinose transport via ABC system (import)      |                       | Transport, Extracellular        | Evidence from literature                      | PMID:2557798                                | <i>B. thetaiotaomicron</i> can use raffinose as carbon source.                                                                                                                                                                                                                              |           |
| RFA_BT      | Formation of lipidA and sugar core for LPS       |                       | Lipopolysaccharide Biosynthesis | Evidence from literature                      | PMID:18931137, PMID:19460428, PMID:20974832 | Based on <i>H. pylori</i> LPS biosynthesis (BIGG database), as in the <i>P. gingivalis</i> reconstruction (PMID:18931137). <i>P. gingivalis</i> LPS is similar in structure to the <i>Bacteroides</i> LPS. Based on structural information taken from (PMID:19460428, PMID:20974832).       |           |
| RFAC_HP     | RFAC HP                                          |                       | Lipopolysaccharide Biosynthesis | Based on existing metabolic reconstruction    | PMID:18931137, PMID:19460428, PMID:20974832 | Based on <i>H. pylori</i> LPS biosynthesis (BIGG database), as in the <i>P. gingivalis</i> reconstruction (PMID:18931137). <i>P. gingivalis</i> LPS is similar in structure to the <i>Bacteroides</i> LPS. Based on structural information taken from (PMID:19460428, PMID:20974832).       |           |

| <b>BIGG Rxn ID</b> | <b>Function</b>                                 | <b>GPR</b>                                                                                                                                                                                                                                                                                                                                                                                                                                       | <b>Subsystem</b>                 | <b>Reason for addition</b> | <b>Reference</b> | <b>Notes</b>                                                                                                                                                                                                                                                                                           | <b>EC Number</b> |
|--------------------|-------------------------------------------------|--------------------------------------------------------------------------------------------------------------------------------------------------------------------------------------------------------------------------------------------------------------------------------------------------------------------------------------------------------------------------------------------------------------------------------------------------|----------------------------------|----------------------------|------------------|--------------------------------------------------------------------------------------------------------------------------------------------------------------------------------------------------------------------------------------------------------------------------------------------------------|------------------|
| RHAMNOGALURASE_I   | Rhamnogalacturonan I degradation, extracellular | (BT_1021 and BT_3662 and (BT_4152 or BT_0983 or BT_0992 or BT_0993 or BT_0996) and (BT_1001 or BT_1013 or BT_1019) and (BT_4146 or BT_4149 or BT_4153 or BT_4155 or BT_4183 or BT_4115 or BT_4116 or BT_1011 or BT_1018) and (BT_4150 or BT_4173) and BT_4175 and (BT_4109 or BT_4110) and ((BT_4670 and BT_4671) or (BT_4164 and BT_4165) or (BT_4113 and BT_4114) or (BT_1028 and BT_1029) or (BT_1683 and BT_1683) or (BT_3670 and BT_3671))) | Plant Polysaccharide Degradation | Evidence from literature   | PMID: 22205877   | B. thetaiotaomicron grows on rhamnogalacturonan I. The genes included in the GPR are upregulated during growth. Enzymes/ proteins assumed to be involved: arabinosidase, xylosidase, galactosidase, galacturonidase, rhamnogalacturonan esterase, rhamnogalacturonan lyase, pectinesterase, susC/ SusD |                  |

| <b>BIGG Rxn ID</b> | <b>Function</b>                                       | <b>GPR</b>                                                                                                                                                                                                                                                                                                                                                                                                                                                                                                                 | <b>Subsystem</b>                 | <b>Reason for addition</b> | <b>Reference</b> | <b>Notes</b>                                                                                                                                                                                                                                                                                                                                                                                                        | <b>EC Number</b> |
|--------------------|-------------------------------------------------------|----------------------------------------------------------------------------------------------------------------------------------------------------------------------------------------------------------------------------------------------------------------------------------------------------------------------------------------------------------------------------------------------------------------------------------------------------------------------------------------------------------------------------|----------------------------------|----------------------------|------------------|---------------------------------------------------------------------------------------------------------------------------------------------------------------------------------------------------------------------------------------------------------------------------------------------------------------------------------------------------------------------------------------------------------------------|------------------|
| RHAMNOGALURASEe_II | Rhamnogalacturonan II degradation, extracellular      | (BT_1021 or BT_0348) and (BT_3662 or BT_3663) and BT_1011 and BT_3664 and BT_3665 and (BT_4152 or BT_0983 or BT_0992 or BT_0993 or BT_0996) and (BT_1001 or BT_1013 or BT_1019) and (BT_4146 or BT_4149 or BT_4153 or BT_4155 or BT_4183 or BT_4115 or BT_4116 or BT_1018) and (BT_4150 or BT_4173) and BT_4175 and (BT_4109 or BT_4110) and ((BT_4670 and BT_4671) or (BT_4164 and BT_4165) or (BT_4113 and BT_4114) or (BT_1028 and BT_1029) or (BT_1683 and BT_1683) or (BT_3670 and BT_3671) or (BT_1024 and BT_1025)) | Plant Polysaccharide Degradation | Evidence from literature   | PMID: 22205877   | B. thetaiotaomicron grows on rhamnogalacturonan I. I'm not sure what happens to the rare sugars included in RGII. The genes included in the GPR are upregulated during growth. Enzymes/ proteins assumed to be involved: arabinosidase, xylosidase, galactosidase, fucosidase, beta-glucosidase, galacturonisidase, glucuronidase rhamnogalactorunan esterase, rhamnogalacturonan lyase, pectinesterase, susC/ SusD |                  |
| RIBFLVt2r          | riboflavin transport in via proton symport reversible |                                                                                                                                                                                                                                                                                                                                                                                                                                                                                                                            | Transport, Extracellular         | Evidence from literature   | PMID:9167138     | Riboflavin is synthesized by the gut bacterial flora of the colon.                                                                                                                                                                                                                                                                                                                                                  |                  |

| BIGG Rxn ID      | Function                                             | GPR                           | Subsystem                | Reason for addition                           | Reference                                    | Notes                                                                                                                                                                                                                                                                                                                                                                                                                                                                                                                                                    | EC Number |
|------------------|------------------------------------------------------|-------------------------------|--------------------------|-----------------------------------------------|----------------------------------------------|----------------------------------------------------------------------------------------------------------------------------------------------------------------------------------------------------------------------------------------------------------------------------------------------------------------------------------------------------------------------------------------------------------------------------------------------------------------------------------------------------------------------------------------------------------|-----------|
| RIBt2r           | ribose transport in via proton symporter, reversible |                               | Transport, Extracellular | Evidence from literature                      | PMID: 17579514                               | <i>Bacteroides thetaiotaomicron</i> grows on D-ribose.                                                                                                                                                                                                                                                                                                                                                                                                                                                                                                   |           |
| SERPT            | serine C-palmitoyltransferase                        | BT_0870                       | Sphingolipid Metabolism  | Evidence from literature                      | PMID:16887518, PMID:20855611                 | <i>Bacteroides</i> are well established to produce sphingolipids. Homologs of human serine palmitoyl transferase were found in <i>Bacteroides</i> and related species. In <i>B. thetaiotaomicron</i> , BLASTP of human serine palmitoyl transferase subunit 1 returns BT_0870, 8-amino-7-oxononanoate synthase, as homolog. It is unclear if this gene really encodes SERPT. Presence of this enzyme is supported by inhibition of sphingolipid synthesis in <i>B. fragilis</i> if cultures are exposed to the SERPT inhibitor myriocin (PMID:20855611). | 2.3.1.50  |
| SHSL2r           | O-succinylhomoserine lyase (H2S)                     | (BT_1923 or BT_2387)          | Methionine Metabolism    | Manually added gene annotation from databases |                                              |                                                                                                                                                                                                                                                                                                                                                                                                                                                                                                                                                          |           |
| SIAASE_OGLYCAN1e | Sialidase, mucin-type O-glycans, extracellular       | BT_0455 or BT_2194 or BT_2892 | O-Glycan Degradation     | Evidence from literature                      | PMID: 18996345, PMID: 10430883, PMID: 848954 | <i>B. thetaiotaomicron</i> is well known to degrade mucin. The subsystem "O-Glycan Biosynthesis" in Recon1 represents mucin biosynthesis.                                                                                                                                                                                                                                                                                                                                                                                                                |           |
| SIAASE_OGLYCAN2e | Sialidase, mucin-type O-glycans, extracellular       | BT_0455 or BT_2194 or BT_2892 | O-Glycan Degradation     | Evidence from literature                      | PMID: 18996345, PMID: 10430883, PMID: 848954 | <i>B. thetaiotaomicron</i> is well known to degrade mucin. The subsystem "O-Glycan Biosynthesis" in Recon1 represents mucin biosynthesis.                                                                                                                                                                                                                                                                                                                                                                                                                |           |
| SIAASE_OGLYCAN3e | Sialidase, mucin-type O-glycans, extracellular       | BT_0455 or BT_2194 or BT_2892 | O-Glycan Degradation     | Evidence from literature                      | PMID: 18996345, PMID: 10430883, PMID: 848954 | <i>B. thetaiotaomicron</i> is well known to degrade mucin. The subsystem "O-Glycan Biosynthesis" in Recon1 represents mucin biosynthesis.                                                                                                                                                                                                                                                                                                                                                                                                                |           |
| SIAASEe          | sialidase, extracellular                             | BT_0455                       | N-Glycan Degradation     | Evidence from literature                      | PMID:7463468, PMID:15790854, PMID:19304853   | <i>B. thetaiotaomicron</i> has sialidase activity. However, it does not grow on N-acetyl neuraminic acid as sole carbon source (PMID:19304853).                                                                                                                                                                                                                                                                                                                                                                                                          | 3.2.1.18  |
| sink_chols       | sink_reaction_choline sulfate                        |                               | exchange/demand reaction | Manual gapfilling                             |                                              |                                                                                                                                                                                                                                                                                                                                                                                                                                                                                                                                                          |           |

| BIGG Rxn ID | Function                                            | GPR                  | Subsystem                        | Reason for addition      | Reference                                                                                                                            | Notes                                                                                                                                                                                                                      | EC Number |
|-------------|-----------------------------------------------------|----------------------|----------------------------------|--------------------------|--------------------------------------------------------------------------------------------------------------------------------------|----------------------------------------------------------------------------------------------------------------------------------------------------------------------------------------------------------------------------|-----------|
| sink_s      | sink_reaction_sulfur[c]                             |                      | exchange/demand reaction         | Manual gapfilling        |                                                                                                                                      |                                                                                                                                                                                                                            |           |
| SPHMYLN_BTt | Sphingomyelin (B.thetaiotaomicron specific) export  |                      | Sphingolipid Metabolism          | Evidence from literature | PMID:16887518, PMID:20855611, Anaerobe (2001) 07, 103–112 doi:10.1006/anae.2001.0376                                                 | <i>Bacteroides</i> species are well established to produce sphingolipids.                                                                                                                                                  |           |
| SPMDtex2    | spermidine excretion (cytosol to extracellular)     |                      | Transport, Extracellular         | Evidence from literature | PMID:10801923                                                                                                                        | <i>B. thetaiotaomicron</i> secretes putrescine and spermidine.                                                                                                                                                             |           |
| STYSabc     | stachyose transport via ABC system (import)         |                      | Transport, Extracellular         | Evidence from literature | PMID:2557798                                                                                                                         | <i>B. thetaiotaomicron</i> can utilize stachyose as carbon source.                                                                                                                                                         |           |
| SUCCITRDSs  | N-succinyl-L-citrulline desuccinylase (spontaneous) |                      | Arginine and Proline Metabolism  | Manual gapfilling        | PMID:16704984                                                                                                                        | The product of this reaction is used for arginine biosynthesis by <i>B. thetaiotaomicron</i> . It is not known if this reaction happens spontaneously or enzymatically.                                                    |           |
| SUCCt2r     | succinate transport via proton symport              | BT_2756              | Transport, Extracellular         | Evidence from literature | PMID:19321416, PMID:12740060, PMID:11880608                                                                                          | <i>Bacteroides</i> species are well established to produce succinate. Also, growth of <i>B. fragilis</i> is stimulated by uptake of succinate in heme-resitricated culture (PMID:11880608). Annotation based on NCBI Gene. |           |
| SUCR        | sucrose hydrolyzing enzyme                          | BT_1765              | Plant Polysaccharide Degradation | Evidence from literature | PMID:20603004                                                                                                                        | <i>B. thetaiotaomicron</i> can utilize sucrose as carbon source.                                                                                                                                                           | 3.2.1.26  |
| SUCRt2      | sucrose transport in via proton symport             |                      | Transport, Extracellular         | Evidence from literature | PMID:20603004                                                                                                                        | <i>B. thetaiotaomicron</i> can utilize sucrose as carbon source.                                                                                                                                                           |           |
| T2DECAI     | trans-2-decenoyl-ACP isomerase                      |                      | Cell Envelope Biosynthesis       | Manual gapfilling        | PMID:6102980                                                                                                                         | This reaction is carried out by FabA. <i>B. thetaiotaomicron</i> does not have this enzyme. However, production of monounsaturated fatty acids in <i>B. thetaiotaomicron</i> is confirmed.                                 |           |
| TAURtex2    | taurine transport via diffusion                     |                      | Transport, Extracellular         | Evidence from literature | PMID: 14665678                                                                                                                       | Diffusion through a porine assumed due to metabolites small size.                                                                                                                                                          |           |
| TCHOLAH     | Bile acid hydrolase (taurocholate)                  | (BT_1259 or BT_2086) | Bile Acid Metabolism             | Evidence from literature | PMID:10993, Dworkin, M. and S. Falkow (2006). The prokaryotes : a handbook on the biology of bacteria. New York ; [London], Springer | This enzyme was demonstrated in <i>B. thetaiotaomicron</i> (PMID:10993). Growth is stimulated by 20 % bile (textbook The Prokaryotes).                                                                                     | 3.5.1.24  |

| BIGG Rxn ID | Function                                            | GPR     | Subsystem                       | Reason for addition                           | Reference                                                                                                                            | Notes                                                                                                                                                                                                                                                                                 | EC Number |
|-------------|-----------------------------------------------------|---------|---------------------------------|-----------------------------------------------|--------------------------------------------------------------------------------------------------------------------------------------|---------------------------------------------------------------------------------------------------------------------------------------------------------------------------------------------------------------------------------------------------------------------------------------|-----------|
| TCHOLAt2    | taurocholate transport via sodium cotransport       |         | Transport, Extracellular        | Evidence from literature                      | PMID:10993                                                                                                                           | <i>B. thetaiotaomicron</i> metabolizes glycocholate and taurocholate. A bile acid/ sodium symporter is annotated for <i>Bacteroides salanitronis</i> (NCBI Gene, last updated 18.05.11).                                                                                              |           |
| TGBPA       | Tagatose-bisphosphate aldolase                      |         | Alternate Carbon Metabolism     | Evidence from literature                      | PMID:2845859, PMID:10931310                                                                                                          | <i>B. thetaiotaomicron</i> grows on N-acetyl-galactosamine (PMID:2845859), but the utilization pathway is poorly studied. In <i>E. coli</i> , this enzyme is involved in GalNAc utilization (PMID:10931310).                                                                          | 4.1.2.40  |
| THMDP       | thiamin diphosphatase                               | BT_3017 | Thiamine Metabolism             | Manually added gene annotation from databases |                                                                                                                                      | The enzyme is an acid phosphatase with wide specificity. Added based on annotation from The SEED Viewer (last checked 01.07.11)                                                                                                                                                       | 3.1.3.2   |
| THRt2r      | L-threonine reversible transport via proton symport |         | Transport, Extracellular        | Evidence from literature                      | Dworkin, M. and S. Falkow (2006). The prokaryotes : a handbook on the biology of bacteria. New York ; [London], Springer             | <i>B. thetaiotaomicron</i> is weakly proteolytic, so a transport reaction for all amino acids is assumed to be present.                                                                                                                                                               |           |
| TREHe       | alpha, alpha-trehalase                              |         | Alternate Carbon Metabolism     | Evidence from literature                      | PMID:10993, Dworkin, M. and S. Falkow (2006). The prokaryotes : a handbook on the biology of bacteria. New York ; [London], Springer | <i>B. thetaiotaomicron</i> grows on trehalose. The reaction may be carried out by another enzyme, no annotation available.                                                                                                                                                            | 3.2.1.28  |
| U23GAAT_BT  | UDP-3-O-(anteiso-C17)glycosamine acyltransferase    | BT_4207 | Lipopolysaccharide Biosynthesis | Evidence from literature                      | PMID:18931137, PMID:19460428, PMID:20974832                                                                                          | Based on <i>H. pylori</i> LPS biosynthesis (BIGG database), as in the <i>P. gingivalis</i> reconstruction (PMID:18931137). <i>P. gingivalis</i> LPS is similar in structure to the <i>Bacteroides</i> LPS. Based on structural information taken from (PMID:19460428, PMID:20974832). |           |

| BIGG Rxn ID | Function                                  | GPR                  | Subsystem                            | Reason for addition                        | Reference                                   | Notes                                                                                                                                                                                                                                                                                 | EC Number |
|-------------|-------------------------------------------|----------------------|--------------------------------------|--------------------------------------------|---------------------------------------------|---------------------------------------------------------------------------------------------------------------------------------------------------------------------------------------------------------------------------------------------------------------------------------------|-----------|
| U2GAAT_BT   | u2gaat                                    |                      | Lipopolysaccharide Biosynthesis      | Evidence from literature                   | PMID:18931137, PMID:19460428, PMID:20974832 | Based on <i>H. pylori</i> LPS biosynthesis (BIGG database), as in the <i>P. gingivalis</i> reconstruction (PMID:18931137). <i>P. gingivalis</i> LPS is similar in structure to the <i>Bacteroides</i> LPS. Based on structural information taken from (PMID:19460428, PMID:20974832). |           |
| U2GAAT2_BT  | u2gaat2                                   |                      | Lipopolysaccharide Biosynthesis      | Evidence from literature                   | PMID:18931137, PMID:19460428, PMID:20974832 | Based on <i>H. pylori</i> LPS biosynthesis (BIGG database), as in the <i>P. gingivalis</i> reconstruction (PMID:18931137). <i>P. gingivalis</i> LPS is similar in structure to the <i>Bacteroides</i> LPS. Based on structural information taken from (PMID:19460428, PMID:20974832). |           |
| UACMAMO     | UDP-N-acetyl-D-mannosamine oxidoreductase | BT_0602              | Capsular Polysaccharide Biosynthesis | Evidence from literature                   | PMID:17579514                               | Annotation taken from PMID:17579514, Table S5                                                                                                                                                                                                                                         |           |
| UAGAAT_HP   | UDP-N-acetylglucosamine acyltransferase   | (BT_3336 or BT_4205) | Lipopolysaccharide Biosynthesis      | Based on existing metabolic reconstruction | PMID:18931137, PMID:19460428, PMID:20974832 | Based on <i>H. pylori</i> LPS biosynthesis (BIGG database), as in the <i>P. gingivalis</i> reconstruction (PMID:18931137). <i>P. gingivalis</i> LPS is similar in structure to the <i>Bacteroides</i> LPS. Based on structural information taken from (PMID:19460428, PMID:20974832). |           |
| UAGDP       | UDP-N-acetylglucosamine diphosphorylase   |                      | Aminosugar Metabolism                | Manual gapfilling                          | PMID:7240086                                | Manually filled in based on KEGG Pathway to to make N-acetylglucosamine, a substrate known to support growth, usable.                                                                                                                                                                 | 2.7.7.23  |
| UAGDP2      | UDP-glucosamine diphosphorylase           |                      | Aminosugar Metabolism                | Based on existing metabolic reconstruction | PMID:18931137, PMID:19460428, PMID:20974832 | Based on <i>H. pylori</i> LPS biosynthesis (BIGG database), as in the <i>P. gingivalis</i> reconstruction (PMID:18931137). <i>P. gingivalis</i> LPS is similar in structure to the <i>Bacteroides</i> LPS. Based on structural information taken from (PMID:19460428, PMID:20974832). | 2.7.7.23  |

| BIGG Rxn ID | Function                                           | GPR                             | Subsystem                                  | Reason for addition                           | Reference                                                                                                                        | Notes                                                                                                                                                                                                                                                                                                                                                                                                                                 | EC Number |
|-------------|----------------------------------------------------|---------------------------------|--------------------------------------------|-----------------------------------------------|----------------------------------------------------------------------------------------------------------------------------------|---------------------------------------------------------------------------------------------------------------------------------------------------------------------------------------------------------------------------------------------------------------------------------------------------------------------------------------------------------------------------------------------------------------------------------------|-----------|
| UDPGLCURE   | UDP-glucuronate 5-epimerase                        | (BT_0600 or BT_1342 or BT_0380) | Pentose and Glucuronate Interconversions   | Manually added gene annotation from databases |                                                                                                                                  | Annotation taken from The SEED. This reaction is probably involved in chondroitin sulfate degradation, but the exact pathway is unknown.                                                                                                                                                                                                                                                                                              | 5.1.3.12  |
| UDPGLCD     | UDP-D-glucuronate decarboxylase                    | BT_1059                         | Capsular Polysaccharide Biosynthesis       | Evidence from literature                      | PMID:21804000                                                                                                                    | The product is likely a precursor for capsule polysaccharide biosynthesis, but the exact function is unknown.                                                                                                                                                                                                                                                                                                                         | 4.1.1.35  |
| UGLT        | UDPglucose--hexose-1-phosphate uridylyltransferase |                                 | Alternate Carbon Metabolism                | Manual gapfilling                             | PMID:16887504                                                                                                                    | The reaction is needed for galactose utilization.                                                                                                                                                                                                                                                                                                                                                                                     | 2.7.7.12  |
| UHGADA_HP   | UDP-3-O-acetylglucosamine deacetylase              |                                 | Lipopolysaccharide Biosynthesis            | Based on existing metabolic reconstruction    | PMID:18931137, PMID:19460428, PMID:20974832                                                                                      | Based on <i>H. pylori</i> LPS biosynthesis (BIGG database), as in the <i>P. gingivalis</i> reconstruction (PMID:18931137). <i>P. gingivalis</i> LPS is similar in structure to the <i>Bacteroides</i> LPS. Based on structural information taken from (PMID:19460428, PMID:20974832).                                                                                                                                                 |           |
| USHD_BT     | UDP-sugar hydrolase                                | BT_3697                         | Lipopolysaccharide Biosynthesis            | Evidence from literature                      | PMID:18931137, PMID:19460428, PMID:20974832                                                                                      | Based on <i>H. pylori</i> LPS biosynthesis (BIGG database), as in the <i>P. gingivalis</i> reconstruction (PMID:18931137). <i>P. gingivalis</i> LPS is similar in structure to the <i>Bacteroides</i> LPS. Based on structural information taken from (PMID:19460428, PMID:20974832).                                                                                                                                                 |           |
| VALO        | Valine oxidation by gut bacteria                   |                                 | Valine, Leucine, and Isoleucine Metabolism | Evidence from literature                      | PMID:3572204, PMID:16887608, Krieg NR (2010) Bergey's manual of systematic bacteriology, 2nd ed., volume 4 (Springer, New York). | Valine and leucine are oxidized by gut bacteria to BCFA (branched-chain fatty acids) with one less carbon atom (isobutyrate and isovalerate, respectively), CO2 and ammonia. This reaction formula is hypothetical, no information on exact pathway and involved enzymes is available. KEGG does not provide any pathway information either. Isobutyrate and isovalerate are known secretion products of <i>B. thetaiotaomicron</i> . |           |

| BIGG Rxn ID | Function                                         | GPR | Subsystem                | Reason for addition      | Reference    | Notes                                                                                                                                                                                                                            | EC Number |
|-------------|--------------------------------------------------|-----|--------------------------|--------------------------|--------------|----------------------------------------------------------------------------------------------------------------------------------------------------------------------------------------------------------------------------------|-----------|
| VALt2r      | L-valine reversible transport via proton symport |     | Transport, Extracellular | Evidence from literature | PMID:7462155 | <i>B. thetaiotaomicron</i> incorporates leucine, valine and isoleucine into its phospholipids, which suggests the presence of a transporter for these amino acids. However, it is not known which gene encodes this transporter. |           |

Table S10f: Reactions which underwent a change in directionality during manual curation based on directionalities found in other reconstructions (BIGG Database).

| SEED Rxn ID | BIGG Rxn ID | Function                          | Directionality in iAH991 | Directionality in <i>Bθ Seed v1</i> |
|-------------|-------------|-----------------------------------|--------------------------|-------------------------------------|
| rxn00020    | BGLA        | 1,4-beta-D-Glucan glucohydrolase  | Irreversible             | Reversible                          |
| rxn00022    | MALT        | alpha-glucosidase                 | Irreversible             | Reversible                          |
| rxn00056    | FERO        | ferroxidase                       | Irreversible             | Reversible                          |
| rxn00077    | NADK        | NAD kinase                        | Irreversible             | Reversible                          |
| rxn00085    | GLUSy       | glutamate synthase (NADPH)        | Irreversible             | Reversible                          |
| rxn00119    | URIDK1      | uridylate kinase (UMP)            | Irreversible             | Reversible                          |
| rxn00124    | PYDXK       | pyridoxal kinase                  | Irreversible             | Reversible                          |
| rxn00131    | AMPN        | AMP nucleosidase                  | Irreversible             | Reversible                          |
| rxn00148    | PYK         | pyruvate kinase                   | Irreversible             | Reversible                          |
| rxn00151    | PPDK        | Pyruvate phosphate dikinase       | Irreversible             | Reversible                          |
| rxn00157    | PFL         | pyruvate formate lyase            | Irreversible             | Reversible                          |
| rxn00179    | GLU5K       | glutamate 5-kinase                | Irreversible             | Reversible                          |
| rxn00182    | GLUDxi      | glutamate dehydrogenase (NAD)     | Irreversible             | Reversible                          |
| rxn00183    | PUTA3       | puta3                             | Irreversible             | Reversible                          |
| rxn00216    | HEX1        | hexokinase (D-glucose:ATP)        | Irreversible             | Reversible                          |
| rxn00247    | PPCKr       | phosphoenolpyruvate carboxykinase | Reversible               | Irreversible                        |
| rxn00250    | PC          | pyruvate carboxylase              | Irreversible             | Reversible                          |
| rxn00303    | GTPDPK      | GTP diphosphokinase               | Irreversible             | Reversible                          |
| rxn00347    | ASPT        | L-aspartase                       | Irreversible             | Reversible                          |
| rxn00361    | ADSK        | adenylyl-sulfate kinase           | Irreversible             | Reversible                          |
| rxn00365    | CYTDK1      | ATPcytidine 5-phosphotransferase  | Irreversible             | Reversible                          |
| rxn00368    | CYTDK4      | UTPcytidine 5-phosphotransferase  | Irreversible             | Reversible                          |
| rxn00369    | CYTDK2      | cytidine kinase (GTP)             | Irreversible             | Reversible                          |

| SEED Rxn ID | BIGG Rxn ID | Function                                                                             | Directionality in iAH991 | Directionality in <i>Bθ Seed v1</i> |
|-------------|-------------|--------------------------------------------------------------------------------------|--------------------------|-------------------------------------|
| rxn00379    | SADT        | sulfate adenyltransferase                                                            | Irreversible             | Reversible                          |
| rxn00392    | RBFK        | riboflavin kinase                                                                    | Irreversible             | Reversible                          |
| rxn00394    | ARGN        | arginase                                                                             | Irreversible             | Reversible                          |
| rxn00410    | CTPS1       | CTP synthase (NH <sub>3</sub> )                                                      | Irreversible             | Reversible                          |
| rxn00440    | TMDPK       | Thiamin pyrophosphokinase (EC 2.7.6.2)                                               | Irreversible             | Reversible                          |
| rxn00469    | ACODA       | acetylornithine deacetylase                                                          | Irreversible             | Reversible                          |
| rxn00473    | TRPAS2      | Tryptophanase (L-tryptophan)                                                         | Reversible               | Irreversible                        |
| rxn00474    | TRPS2       | tryptophan synthase (indole)                                                         | Irreversible             | Reversible                          |
| rxn00503    | P5CD        | 1-pyrroline-5-carboxylate dehydrogenase                                              | Irreversible             | Reversible                          |
| rxn00533    | ACCOAC      | acetyl-CoA carboxylase                                                               | Irreversible             | Reversible                          |
| rxn00545    | PFK         | phosphofructokinase                                                                  | Irreversible             | Reversible                          |
| rxn00547    | HEX7        | hexokinase (D-fructose:ATP)                                                          | Irreversible             | Reversible                          |
| rxn00551    | PFK(ppi)    | Pyrophosphate--fructose 6-phosphate 1-phosphotransferase, beta subunit (EC 2.7.1.90) | Irreversible             | Reversible                          |
| rxn00609    | MI1PS       | myo-Inositol-1-phosphate synthase                                                    | Irreversible             | Reversible                          |
| rxn00650    | AMPTASECG   | alanyl aminopeptidase (cys-gly)                                                      | Irreversible             | Reversible                          |
| rxn00670    | PTA2        | Phosphate acetyltransferase                                                          | Irreversible             | Reversible                          |
| rxn00690    | FTHFLi      | formate-tetrahydrofolate ligase                                                      | Irreversible             | Reversible                          |
| rxn00707    | CYTDK3      | ITPcytidine 5-phosphotransferase                                                     | Irreversible             | Reversible                          |
| rxn00709    | URIK1       | uridine kinase (ATP:Uridine)                                                         | Irreversible             | Reversible                          |
| rxn00713    | URIK2       | uridine kinase (GTP:Uridine)                                                         | Irreversible             | Reversible                          |
| rxn00715    | URIK3       | uridine kinase (ITP:Uridine)                                                         | Irreversible             | Reversible                          |
| rxn00758    | GPDDA1      | Glycerophosphodiester phosphodiesterase (Glycerophosphocholine)                      | Irreversible             | Reversible                          |
| rxn00772    | RBK         | ribokinase                                                                           | Irreversible             | Reversible                          |
| rxn00808    | GALK        | galactokinase                                                                        | Irreversible             | Reversible                          |
| rxn00817    | GALS3       | α-galactosidase (melibiose)                                                          | Irreversible             | Reversible                          |

| SEED Rxn ID | BIGG Rxn ID | Function                                                                | Directionality in iAH991 | Directionality in <i>BØ Seed v1</i> |
|-------------|-------------|-------------------------------------------------------------------------|--------------------------|-------------------------------------|
| rxn00818    | RAFGH       | Raffinose galactohydrolase                                              | Irreversible             | Reversible                          |
| rxn00834    | IMPD        | IMP dehydrogenase                                                       | Irreversible             | Reversible                          |
| rxn00892    | ACGAMK      | N-acetylglucosamine kinase                                              | Irreversible             | Reversible                          |
| rxn00910    | MTHFR3      | 5,10-methylenetetrahydrofolatereductase (NADPH)                         | Irreversible             | Reversible                          |
| rxn00912    | MOHMT       | 3-methyl-2-oxobutanoate hydroxymethyltransferase                        | Irreversible             | Reversible                          |
| rxn00927    | ADNUC       | adenosine hydrolase                                                     | Irreversible             | Reversible                          |
| rxn00929    | PRO1x       | L-ProlineNAD+ 5-oxidoreductase                                          | Irreversible             | Reversible                          |
| rxn00947    | FACOAL160   | fatty-acid--CoA ligase (hexadecanoate)                                  | Reversible               | Irreversible                        |
| rxn01021    | MTAN        | methylthioadenosine nucleosidase                                        | Irreversible             | Reversible                          |
| rxn01068    | THRD        | L-threonine dehydrogenase                                               | Irreversible             | Reversible                          |
| rxn01073    | GPDDA2      | Glycerophosphodiester phosphodiesterase<br>(Glycerophosphoethanolamine) | Irreversible             | Reversible                          |
| rxn01102    | GLYCK       | glycerate kinase                                                        | Irreversible             | Reversible                          |
| rxn01114    | RBK_D       | D-ribulokinase                                                          | Irreversible             | Reversible                          |
| rxn01143    | TMDK1       | thymidine kinase (ATP:thymidine)                                        | Irreversible             | Reversible                          |
| rxn01169    | HEXb        | ATPD-glucose 6-phosphotransferase                                       | Irreversible             | Reversible                          |
| rxn01217    | DCMPDA      | dCMP deaminase                                                          | Reversible               | Irreversible                        |
| rxn01226    | GNNUC       | gnnuc                                                                   | Irreversible             | Reversible                          |
| rxn01236    | BUTK        | Butyrate kinase                                                         | Irreversible             | Reversible                          |
| rxn01257    | PABB        | Chorismate L-glutamine aminotransferase                                 | Irreversible             | Reversible                          |
| rxn01265    | NAMNPP      | nicotinic acid mononucleotide pyrophosphorylase                         | Irreversible             | Reversible                          |
| rxn01299    | INSH        | Inosine hydrolase                                                       | Irreversible             | Reversible                          |
| rxn01300    | HSK         | homoserine kinase                                                       | Irreversible             | Reversible                          |
| rxn01301    | HSDxi2      | homoserine dehydrogenase (NADH), irreversible                           | Irreversible             | Reversible                          |
| rxn01302    | HSDyi2      | homoserine dehydrogenase (NADPH), irreversible                          | Irreversible             | Reversible                          |
| rxn01343    | PFK_3       | ATPSedoheptulose 7-phosphate 1-phosphotransferase                       | Irreversible             | Reversible                          |

| SEED Rxn ID | BIGG Rxn ID | Function                                                             | Directionality in iAH991 | Directionality in <i>Bθ Seed v1</i> |
|-------------|-------------|----------------------------------------------------------------------|--------------------------|-------------------------------------|
| rxn01362    | ORPT        | orotate phosphoribosyltransferase                                    | Reversible               | Irreversible                        |
| rxn01396    | PYDXNK      | pyridoxine kinase                                                    | Irreversible             | Reversible                          |
| rxn01476    | PGL         | 6-phosphogluconolactonase                                            | Irreversible             | Reversible                          |
| rxn01484    | AGDC        | N-acetylglucosamine-6-phosphate deacetylase                          | Irreversible             | Reversible                          |
| rxn01518    | DURIK1      | deoxyuridine kinase (ATP:Deoxyuridine)                               | Irreversible             | Reversible                          |
| rxn01545    | XTSNH       | Xanthosine hydrolase                                                 | Irreversible             | Reversible                          |
| rxn01675    | G1PTT       | glucose-1-phosphate thymidyltransferase                              | Irreversible             | Reversible                          |
| rxn01737    | RAFH        | raffinose hydrolyzing enzyme                                         | Irreversible             | Reversible                          |
| rxn01739    | SHKK        | shikimate kinase                                                     | Irreversible             | Reversible                          |
| rxn01763    | RBK_L1      | L-ribulokinase (L-ribulose)                                          | Irreversible             | Reversible                          |
| rxn01790    | DPR         | 2-dehydropantoate 2-reductase                                        | Irreversible             | Reversible                          |
| rxn01807    | PYDAMK      | pyridoxamine kinase                                                  | Irreversible             | Reversible                          |
| rxn01834    | LGTHL       | lactoylglutathione lyase                                             | Irreversible             | Reversible                          |
| rxn01917    | ACGK        | acetylglutamate kinase                                               | Irreversible             | Reversible                          |
| rxn01964    | TRPS1       | tryptophan synthase (indoleglycerol phosphate)                       | Irreversible             | Reversible                          |
| rxn02000    | TDPDRE      | dTDP-4-dehydrorhamnose 3,5-epimerase                                 | Irreversible             | Reversible                          |
| rxn02003    | TDPDRR      | dTDP-4-dehydrorhamnose reductase                                     | Irreversible             | Reversible                          |
| rxn02085    | URCN        | urocanase                                                            | Irreversible             | Reversible                          |
| rxn02160    | HISTP       | histidinol-phosphatase                                               | Irreversible             | Reversible                          |
| rxn02161    | RMK         | rhamnulokinase                                                       | Irreversible             | Reversible                          |
| rxn02200    | DHPS        | dihydropteroate synthase                                             | Irreversible             | Reversible                          |
| rxn02269    | OIVD3       | 2-oxoisovalerate dehydrogenase (acylating; 3-methyl-2-oxopentanoate) | Irreversible             | Reversible                          |
| rxn02297    | AOXSr       | 8-amino-7-oxononanoate synthase                                      | Reversible               | Irreversible                        |
| rxn02305    | TMPPP       | thiamine-phosphate diphosphorylase                                   | Irreversible             | Reversible                          |
| rxn02314    | PFK_2       | Phosphofructokinase                                                  | Irreversible             | Reversible                          |

| SEED Rxn ID | BIGG Rxn ID        | Function                                                                                                          | Directionality in iAH991 | Directionality in <i>Bθ Seed v1</i> |
|-------------|--------------------|-------------------------------------------------------------------------------------------------------------------|--------------------------|-------------------------------------|
| rxn02319    | FCLK               | L-fuculokinase                                                                                                    | Irreversible             | Reversible                          |
| rxn02339    | EHGLAT             | L-erythro-4-Hydroxyglutamate:2-oxoglutarate aminotransferase                                                      | Irreversible             | Reversible                          |
| rxn02374    | G5SADs             | L-glutamate 5-semialdehyde dehydratase (spontaneous)                                                              | Reversible               | Irreversible                        |
| rxn02465    | AGPR               | N-acetyl-g-glutamyl-phosphate reductase                                                                           | Reversible               | Irreversible                        |
| rxn02474    | APRAUR             | 5-amino-6-(5-phosphoribosylamino)uracil reductase                                                                 | Irreversible             | Reversible                          |
| rxn02503    | HPPK               | 2-amino-4-hydroxy-6-hydroxymethyldihydropteridine diphosphokinase                                                 | Irreversible             | Reversible                          |
| rxn02504    | DHNPA              | dihydroneopterin aldolase                                                                                         | Irreversible             | Reversible                          |
| rxn02835    | PRAMPC             | phosphoribosyl-AMP cyclohydrolase                                                                                 | Irreversible             | Reversible                          |
| rxn02875    | AMAA               | N-acetylmuramoyl-L-alanine amidase                                                                                | Irreversible             | Reversible                          |
| rxn02929    | DHDPRy             | dihydrodipicolinate reductase (NADPH)                                                                             | Irreversible             | Reversible                          |
| rxn02937    | PRAIS              | phosphoribosylaminoimidazole synthase                                                                             | Irreversible             | Reversible                          |
| rxn02938    | AIRC <sub>r</sub>  | phosphoribosylaminoimidazole carboxylase                                                                          | Reversible               | Irreversible                        |
| rxn03004    | GARFT <sub>i</sub> | phosphoribosylglycinamide formyltransferase, irreversible                                                         | Irreversible             | Reversible                          |
| rxn03108    | PMPK               | phosphomethylpyrimidine kinase                                                                                    | Irreversible             | Reversible                          |
| rxn03395    | OHPHM              | 2-octaprenyl-6-hydroxyphenol methylase                                                                            | Irreversible             | Reversible                          |
| rxn03408    | UAGPT3             | UDP-N-acetylglucosamine-N-acetylmuramyl-(pentapeptide)pyrophosphoryl-undecaprenol N-acetylglucosamine transferase | Irreversible             | Reversible                          |
| rxn03903    | PAPPT2             | phospho-N-acetylmuramoyl-pentapeptide-transferase (gamma-glutamate)                                               | Irreversible             | Reversible                          |
| rxn03904    | PAPPT3             | phospho-N-acetylmuramoyl-pentapeptide-transferase (meso-2,6-diaminopimelate)                                      | Irreversible             | Reversible                          |
| rxn03907    | MEPCT              | 2-C-methyl-D-erythritol 4-phosphate cytidyltransferase                                                            | Irreversible             | Reversible                          |
| rxn03908    | CDPMEK             | 4-(cytidine 5-diphospho)-2-C-methyl-D-erythritol kinase                                                           | Irreversible             | Reversible                          |
| rxn03910    | MECDPS             | 2-C-methyl-D-erythritol 2,4-cyclodiphosphate synthase                                                             | Irreversible             | Reversible                          |
| rxn03933    | UAGPT2             | UDP-N-acetylglucosamine-N-acetylmuramyl-(pentapeptide)pyrophosphoryl-undecaprenol N-acetylglucosamine transferase | Irreversible             | Reversible                          |
| rxn03958    | DXPRI <sub>i</sub> | 1-deoxy-D-xylulose reductoisomerase                                                                               | Irreversible             | Reversible                          |

| SEED Rxn ID | BIGG Rxn ID | Function                                                   | Directionality in iAH991 | Directionality in <i>Bθ Seed v1</i> |
|-------------|-------------|------------------------------------------------------------|--------------------------|-------------------------------------|
| rxn03962    | GFUCS       | GDP-L-fucose synthase                                      | Irreversible             | Reversible                          |
| rxn04794    | OBTFL       | 2-Oxobutanoate formate lyase                               | Irreversible             | Reversible                          |
| rxn04954    | MTHFR2      | 5,10-methylenetetrahydrofolate reductase (NADH)            | Irreversible             | Reversible                          |
| rxn05144    | PLPS        | Pyridoxine biosynthesis glutamine amidotransferase         | Irreversible             | Reversible                          |
| rxn05145    | Plabc       | phosphate transport via ABC system                         | Irreversible             | Reversible                          |
| rxn05200    | THMDt2      | thymidine transport in via proton symport                  | Irreversible             | Reversible                          |
| rxn05247    | FACOALI14   | fatty-acid--CoA ligase (ISO14)                             | Reversible               | Irreversible                        |
| rxn05248    | FACOALAI15  | fatty-acid--CoA ligase (ANTEISO15)                         | Reversible               | Irreversible                        |
| rxn05249    | FACOALI15   | fatty-acid--CoA ligase (ISO15)                             | Reversible               | Irreversible                        |
| rxn05250    | FACOALI16   | fatty-acid--CoA ligase (ISO16)                             | Reversible               | Irreversible                        |
| rxn05251    | FACOALAI17  | fatty-acid--CoA ligase (ANTEISO17)                         | Reversible               | Irreversible                        |
| rxn05252    | FACOALI17   | fatty-acid--CoA ligase (ISO17)                             | Reversible               | Irreversible                        |
| rxn05313    | Plt8i       | phosphate transport in via Na+ symporter, irreversible     | Irreversible             | Reversible                          |
| rxn05318    | ADNt2       | adenosine transport in via proton symport                  | Irreversible             | Reversible                          |
| rxn05319    | H2Ot        | H2O transport via diffusion                                | Reversible               | Irreversible                        |
| rxn05329    | 3HAD40      | 3-hydroxyacyl-[acyl-carrier-protein] dehydratase (n-C4:0)  | Irreversible             | Reversible                          |
| rxn05330    | 3HAD60      | 3-hydroxyacyl-[acyl-carrier-protein] dehydratase (n-C6:0)  | Irreversible             | Reversible                          |
| rxn05331    | 3HAD120     | 3-hydroxyacyl-[acyl-carrier-protein] dehydratase (n-C12:0) | Irreversible             | Reversible                          |
| rxn05332    | 3HAD160     | 3-hydroxyacyl-[acyl-carrier-protein] dehydratase (n-C16:0) | Irreversible             | Reversible                          |
| rxn05333    | 3HAD100     | 3-hydroxyacyl-[acyl-carrier-protein] dehydratase (n-C10:0) | Irreversible             | Reversible                          |
| rxn05334    | 3HAD80      | 3-hydroxyacyl-[acyl-carrier-protein] dehydratase (n-C8:0)  | Irreversible             | Reversible                          |
| rxn05335    | 3HAD140     | 3-hydroxyacyl-[acyl-carrier-protein] dehydratase (n-C14:0) | Irreversible             | Reversible                          |
| rxn05361    | 3HAD4M6     | 4-methyl-3-hydroxy-hexanoyl-ACP hydro-lyase                | Irreversible             | Reversible                          |
| rxn05365    | 3HAD6M8     | 6-methyl-3-hydroxy-octanoyl-ACP hydro-lyase                | Irreversible             | Reversible                          |
| rxn05369    | 3HAD8M10    | 8-methyl-3-hydroxy-decanoyl-ACP hydro-lyase                | Irreversible             | Reversible                          |

| SEED Rxn ID | BIGG Rxn ID | Function                                                     | Directionality in iAH991 | Directionality in <i>Bθ Seed v1</i> |
|-------------|-------------|--------------------------------------------------------------|--------------------------|-------------------------------------|
| rxn05373    | 3HAD10M12   | 10-methyl-3-hydroxy-dodecanoyl-ACP hydro-lyase               | Irreversible             | Reversible                          |
| rxn05377    | 3HAD12M14   | 12-methyl-3-hydroxy-tetra-decanoyl-ACP hydro-lyase           | Irreversible             | Reversible                          |
| rxn05381    | 3HAD14M16   | 14-methyl-3-hydroxy-hexa-decanoyl-ACP hydro-lyase            | Irreversible             | Reversible                          |
| rxn05386    | 3HAD5M6     | 5-methyl-3-hydroxy-hexanoyl-ACP hydro-lyase                  | Irreversible             | Reversible                          |
| rxn05390    | 3HAD7M8     | 7-methyl-3-hydroxy-octanoyl-ACP hydro-lyase                  | Irreversible             | Reversible                          |
| rxn05394    | 3HAD9M10    | 9-methyl-3-hydroxy-decanoyl-ACP hydro-lyase                  | Irreversible             | Reversible                          |
| rxn05398    | 3HAD11M12   | 11-methyl-3-hydroxy-dodecanoyl-ACP hydro-lyase               | Irreversible             | Reversible                          |
| rxn05402    | 3HAD13M14   | 13-methyl-3-hydroxy-tetra-decanoyl-ACP hydro-lyase           | Irreversible             | Reversible                          |
| rxn05406    | 3HAD15M16   | 15-methyl-3-hydroxy-hexa-decanoyl-ACP hydro-lyase            | Irreversible             | Reversible                          |
| rxn05411    | 3HAD4M5     | 4-methyl-3-hydroxy-pentanoyl-ACP hydro-lyase                 | Irreversible             | Reversible                          |
| rxn05415    | 3HAD6M7     | 6-methyl-3-hydroxy-heptanoyl-ACP hydro-lyase                 | Irreversible             | Reversible                          |
| rxn05419    | 3HAD8M9     | 8-methyl-3-hydroxy-nonanoyl-ACP hydro-lyase                  | Irreversible             | Reversible                          |
| rxn05423    | 3HAD10M11   | 10-methyl-3-hydroxy-undecanoyl-ACP hydro-lyase               | Irreversible             | Reversible                          |
| rxn05427    | 3HAD12M13   | 12-methyl-3-hydroxy-tridecanoyl-ACP hydro-lyase              | Irreversible             | Reversible                          |
| rxn05431    | 3HAD14M15   | 14-methyl-3-hydroxy-pentadecanoyl-ACP hydro-lyase            | Irreversible             | Reversible                          |
| rxn05462    | 3HAD180     | 3-hydroxyacyl-[acyl-carrier-protein] dehydratase (n-C18:0)   | Irreversible             | Reversible                          |
| rxn05616    | MGt5        | magnesium transport in/out via permease (no H <sup>+</sup> ) | Reversible               | Irreversible                        |
| rxn05646    | RMNt        | L-rhamnose transport via proton symport                      | Irreversible             | Reversible                          |
| rxn05671    | XYLt2       | D-xylose transport in via proton symport                     | Irreversible             | Reversible                          |
| rxn05736    | FACOAL140   | fatty-acid--CoA ligase (tetradecanoate)                      | Reversible               | Irreversible                        |
| rxn05740    | GLCP        | glycogen phosphorylase                                       | Irreversible             | Reversible                          |
| rxn06023    | ACPS1       | acyl-carrier protein synthase                                | Irreversible             | Reversible                          |
| rxn06077    | METSOXR1    | L-methionine-S-oxide reductase                               | Irreversible             | Reversible                          |
| rxn06493    | GCCc        | glycine-cleavage complex                                     | Irreversible             | Reversible                          |
| rxn06673    | BTNPL       | holocarboxylase synthetase (biotin protein ligase)           | Irreversible             | Reversible                          |

| SEED Rxn ID | BIGG Rxn ID | Function                                                                                   | Directionality in iAH991 | Directionality in <i>BØ Seed v1</i> |
|-------------|-------------|--------------------------------------------------------------------------------------------|--------------------------|-------------------------------------|
| rxn07441    | 26DAPLLATi  | L,L-diaminopimelate aminotransferase (irreversible)                                        | Irreversible             | Reversible                          |
| rxn08040    | ACGAMT      | UDP-N-acetylglucosamine:undecaprenylphosphate N-acetylglucosamine -1-phosphate transferase | Irreversible             | Reversible                          |
| rxn08126    | AMALT1      | Amylomaltase (maltotriose)                                                                 | Irreversible             | Reversible                          |
| rxn08127    | AMALT2      | Amylomaltase (maltotetraose)                                                               | Irreversible             | Reversible                          |
| rxn08128    | AMALT3      | Amylomaltase (maltopentaose)                                                               | Irreversible             | Reversible                          |
| rxn08129    | AMALT4      | Amylomaltase (maltohexaose)                                                                | Irreversible             | Reversible                          |
| rxn08306    | DASYN120    | CDP-diacylglycerol synthetase (n-C12:0)                                                    | Irreversible             | Reversible                          |
| rxn08307    | DASYN140    | CDP-diacylglycerol synthetase (n-C14:0)                                                    | Irreversible             | Reversible                          |
| rxn08309    | DASYN160    | CDP-diacylglycerol synthetase (n-C16:0)                                                    | Irreversible             | Reversible                          |
| rxn08311    | DASYN180    | CDP-diacylglycerol synthetase (n-C18:0)                                                    | Irreversible             | Reversible                          |
| rxn08312    | DASYN181    | CDP-diacylglycerol synthetase (n-C18:1)                                                    | Irreversible             | Reversible                          |
| rxn08527    | FRD2        | fumarate reductase                                                                         | Irreversible             | Reversible                          |
| rxn08528    | FRD3        | fumarate reductase                                                                         | Irreversible             | Reversible                          |
| rxn08669    | GPDDA4      | Glycerophosphodiester phosphodiesterase (Glycerophosphoglycerol)                           | Irreversible             | Reversible                          |
| rxn09108    | PGSA120     | Phosphatidylglycerol synthase (n-C12:0)                                                    | Irreversible             | Reversible                          |
| rxn09109    | PGSA140     | Phosphatidylglycerol synthase (n-C14:0)                                                    | Irreversible             | Reversible                          |
| rxn09111    | PGSA160     | Phosphatidylglycerol synthase (n-C16:0)                                                    | Irreversible             | Reversible                          |
| rxn09113    | PGSA180     | Phosphatidylglycerol synthase (n-C18:0)                                                    | Irreversible             | Reversible                          |
| rxn09114    | PGSA181     | Phosphatidylglycerol synthase (n-C18:1)                                                    | Irreversible             | Reversible                          |
| rxn09188    | PROD2       | Proline dehydrogenase                                                                      | Irreversible             | Reversible                          |
| rxn09197    | PSD120      | Phosphatidylserine decarboxylase (n-C12:0)                                                 | Irreversible             | Reversible                          |
| rxn09198    | PSD140      | Phosphatidylserine decarboxylase (n-C14:0)                                                 | Irreversible             | Reversible                          |
| rxn09200    | PSD160      | Phosphatidylserine decarboxylase (n-C16:0)                                                 | Irreversible             | Reversible                          |
| rxn09202    | PSD180      | Phosphatidylserine decarboxylase (n-C18:0)                                                 | Irreversible             | Reversible                          |
| rxn09203    | PSD181      | Phosphatidylserine decarboxylase (n-C18:1)                                                 | Irreversible             | Reversible                          |

| SEED Rxn ID | BIGG Rxn ID | Function                                              | Directionality in iAH991 | Directionality in <i>Bθ Seed v1</i> |
|-------------|-------------|-------------------------------------------------------|--------------------------|-------------------------------------|
| rxn09240    | SADT2       | Sulfate adenylyltransferase                           | Irreversible             | Reversible                          |
| rxn09272    | SUCDi       | succinate dehydrogenase (irreversible)                | Irreversible             | Reversible                          |
| rxn09448    | FACOAL181   | fatty-acid--CoA ligase (octadecenoate)                | Reversible               | Irreversible                        |
| rxn09449    | FACOAL180   | fatty-acid--CoA ligase (octadecanoate)                | Reversible               | Irreversible                        |
| rxn09450    | FACOAL161   | fatty-acid--CoA ligase (hexadecenoate)                | Reversible               | Irreversible                        |
| rxn09657    | THMt2       | Thiamine transport in via proton antiport             | Reversible               | Irreversible                        |
| rxn09685    | DURIt2      | deoxyuridine transport in via proton symport          | Irreversible             | Reversible                          |
| rxn09687    | DINSi2      | deoxyinosine transport in via proton symport          | Irreversible             | Reversible                          |
| rxn09688    | DGSNi2      | deoxyguanosine transport in via proton symport        | Irreversible             | Reversible                          |
| rxn09997    | AHMMPS      | 4-amino-5-hydroxymethyl-2-methylpyrimidine synthetase | Irreversible             | Reversible                          |
| rxn10042    | ATPS4       | ATP synthase (four protons for one ATP)               | Irreversible             | Reversible                          |
| rxn10060    | NADK2       | NAD kinase (dTTP)                                     | Irreversible             | Reversible                          |
| rxn10199    | PPTGS       | Peptidoglycan subunit synthesis                       | Irreversible             | Reversible                          |
| rxn10220    | DASYNI17    | isoheptadecanoyl-phosphatidate cytidyltransferase     | Irreversible             | Reversible                          |
| rxn10221    | DASYNAI17   | anteisoheptadecanoyl-phosphatidate cytidyltransferase | Irreversible             | Reversible                          |
| rxn10222    | DASYNI14    | isotetradecanoyl-phosphatidate cytidyltransferase     | Irreversible             | Reversible                          |
| rxn10223    | DASYNI15    | isopentadecanoyl-phosphatidate cytidyltransferase     | Irreversible             | Reversible                          |
| rxn10224    | DASYNAI15   | anteisopentadecanoyl-phosphatidate cytidyltransferase | Irreversible             | Reversible                          |
| rxn10225    | DASYNI16    | isohexadecanoyl-phosphatidate cytidyltransferase      | Irreversible             | Reversible                          |
| rxn10232    | PSDI17      | isoheptadecanoyl-phosphatidylserine decarboxylase     | Irreversible             | Reversible                          |
| rxn10233    | PSDAI17     | anteisoheptadecanoyl-phosphatidylserine decarboxylase | Irreversible             | Reversible                          |
| rxn10234    | PSDI14      | isotetradecanoyl-phosphatidylserine decarboxylase     | Irreversible             | Reversible                          |
| rxn10235    | PSDI15      | isopentadecanoyl-phosphatidylserine decarboxylase     | Irreversible             | Reversible                          |
| rxn10236    | PSDAI15     | anteisopentadecanoyl-phosphatidylserine decarboxylase | Irreversible             | Reversible                          |
| rxn10237    | PSDI16      | isohexadecanoyl-phosphatidylserine decarboxylase      | Irreversible             | Reversible                          |

| SEED Rxn ID | BIGG Rxn ID | Function                                                                                | Directionality in iAH991 | Directionality in <i>BØ Seed v1</i> |
|-------------|-------------|-----------------------------------------------------------------------------------------|--------------------------|-------------------------------------|
| rxn10259    | PGSAI17     | isoheptadecanoyl-CDPdiacylglycerolsn-glycerol-3-phosphate 3-phosphatidyltransferase     | Irreversible             | Reversible                          |
| rxn10260    | PGSAAI17    | anteisoheptadecanoyl-CDPdiacylglycerolsn-glycerol-3-phosphate 3-phosphatidyltransferase | Irreversible             | Reversible                          |
| rxn10261    | PGSAI14     | isotetradecanoyl-CDPdiacylglycerolsn-glycerol-3-phosphate 3-phosphatidyltransferase     | Irreversible             | Reversible                          |
| rxn10262    | PGSAI15     | isopentadecanoyl-CDPdiacylglycerolsn-glycerol-3-phosphate 3-phosphatidyltransferase     | Irreversible             | Reversible                          |
| rxn10263    | PGSAAI15    | anteisopentadecanoyl-CDPdiacylglycerolsn-glycerol-3-phosphate 3-phosphatidyltransferase | Irreversible             | Reversible                          |
| rxn10264    | PGSAI16     | isohexadecanoyl-CDPdiacylglycerolsn-glycerol-3-phosphate 3-phosphatidyltransferase      | Irreversible             | Reversible                          |
| rxn10474    | COBALIt5    | cobalt transport in/out via permease (no H <sup>+</sup> )                               | Reversible               | Irreversible                        |
| rxn11946    | DMQMT       | 3-Dimethylubiquinol 3-methyltransferase                                                 | Irreversible             | Reversible                          |
| rxn12510    | PNTK        | pantothenate kinase                                                                     | Irreversible             | Reversible                          |

Table S10g: Changes in gene-protein-reaction (GPR) association based on manual inspection of the automated reconstruction.

**Falsely annotated genes**

| Gene                                        | SEED annotation            | SEED Rxn ID SEED annotation | BIGG Rxn ID SEED annotation | Curated annotation                                                   | BIGG Rxn ID curated annotation              | Source        |
|---------------------------------------------|----------------------------|-----------------------------|-----------------------------|----------------------------------------------------------------------|---------------------------------------------|---------------|
| BT_4151, BT_3292                            | beta-galactosidase         | rxn00816                    | LACZ                        | beta-glucuronidase                                                   | GLCAASEe, GLCAASE8e, GLCAASE9e, GLCAASE_HSe | NCBI Gene     |
| BT_1780, BT_1872, BT_4714, BT_2854, BT_3567 | cytosolic beta-glucosidase | rxn00020                    | BGLA                        | periplasmatic beta-glucosidase (extracellular for modeling purposes) | BGLAe                                       | NCBI Gene     |
| BT_4315                                     | Inorganic pyrophosphatase  | rxn00001                    | PPA                         | Phosphoglycolate phosphatase                                         | PGLYCP                                      | KEGG database |

**Manually updated GPR associations**

| Reaction                                                       | SEED Rxn ID | BIGG Rxn ID | SEED GPR association                                                                   | Curated GPR association                                                                                                 | Source                     |
|----------------------------------------------------------------|-------------|-------------|----------------------------------------------------------------------------------------|-------------------------------------------------------------------------------------------------------------------------|----------------------------|
| 1,4-dihydroxy-2-naphthoate octaprenyltransferase (EC 2.5.1.74) | rxn08333    | DHNAOT4     | BT_2015                                                                                | BT_2014 or BT_2015                                                                                                      | NCBI Gene                  |
| Phosphoglucomutase (5.4.2.2)                                   | rxn00704    | PGMT        | BT_1548                                                                                | BT_1548 or BT_3950                                                                                                      | NCBI Gene                  |
| Phosphoglycolate phosphatase (EC 3.1.3.18)                     | rxn00980    | PGLYCP      | BT_4184                                                                                | (BT_4184 or BT_4315)                                                                                                    | KEGG database              |
| Glutamine synthetase (6.3.1.2)                                 | rxn00187    | GLNS        | (BT_0785 or BT_0453 or BT_4339)                                                        | (BT_0785 or BT_0453 or BT_4339 or BT_0543)                                                                              | NCBI Gene                  |
| N-acetylmuramoyl-L-alanine amidase (EC 3.5.1.28)               | rxn02875    | AMAA        | (BT_0402 or BT_1641 or BT_1706 or BT_4031)                                             | (BT_1991 or BT_2027 or BT_2141 or BT_3200 or BT_4736 or BT_0706 or BT_1168 or BT_1519 or BT_1641 or BT_1706 or BT_4031) | NCBI Gene                  |
| Alpha-glucosidase (EC 3.2.1.20)                                | rxn00022    | MALT        | (BT_0132 or BT_0683 or BT_2620 or BT_3163 or BT_3169 or BT_3294 or BT_3299 or BT_3664) | (BT_0132 or BT_0683 or BT_2620 or BT_3163 or BT_3169 or BT_3294 or BT_3299 or BT_3664 or BT_4581)                       | NCBI Gene                  |
| Peptidoglycan synthetase (EC 2.4.1.129)                        | rxn10199    | PPTGS       | (BT_0162 or BT_2501)                                                                   | (BT_3453 or BT_0943 or BT_0162 or BT_2501)                                                                              | NCBI Gene, The SEED Viewer |

**Table S11a: All reactions included in mouse reconstruction iSS1393.**

Rev = Reversibility (1 = reversible, 0 = irreversible), CS = Confidence score, LB = Lower bound, UB = Upper Bound







|                |                                                                                                                                                        |                                                                                                                                                                                                    |   |                                                                                        |       |      |   |                                           |                                                                                                                                                                                                                                                                                                                                                                                                                                                                                                                                                                                                                                                                                                                                                                         |
|----------------|--------------------------------------------------------------------------------------------------------------------------------------------------------|----------------------------------------------------------------------------------------------------------------------------------------------------------------------------------------------------|---|----------------------------------------------------------------------------------------|-------|------|---|-------------------------------------------|-------------------------------------------------------------------------------------------------------------------------------------------------------------------------------------------------------------------------------------------------------------------------------------------------------------------------------------------------------------------------------------------------------------------------------------------------------------------------------------------------------------------------------------------------------------------------------------------------------------------------------------------------------------------------------------------------------------------------------------------------------------------------|
| AGTPPg         | N-acetylglucosaminide beta-1,5-N-acetylglucosaminyltransferase, Golgi apparatus                                                                        | $\text{acetylgluc} + \text{bet\_psylactig} \rightarrow \text{Hgl} + \text{acetylgluc} + \text{bet\_psylactig}$                                                                                     | 0 | 22084.1 or 22087.1 or 33623.1 or 231727.1 or 22084.1 or 22127.1 or 53625.2 or 100802.1 | 0     | 1000 |   | Keratan sulfate biosynthesis              |                                                                                                                                                                                                                                                                                                                                                                                                                                                                                                                                                                                                                                                                                                                                                                         |
| AGDC           | N-acetylglucosamine-6-phosphate deaminase                                                                                                              | $\text{h2dc} + \text{acetylgluc} \rightarrow \text{acetylgluc} + \text{ac}(\text{gluc})$                                                                                                           | 0 | 245447.1                                                                               | 0     | 1000 |   | Anticancer Metabolism                     |                                                                                                                                                                                                                                                                                                                                                                                                                                                                                                                                                                                                                                                                                                                                                                         |
| AGLPC          | alkyl-acylglycerol phosphocholine transferase                                                                                                          | $\text{alkyl\_phol} + \text{acylglycerol} \rightarrow \text{h2dc} + \text{Hgl} + \text{alkylphol\_h2dc}$                                                                                           | 0 |                                                                                        | 0     | 1000 |   | Glycerophospholipid Metabolism            |                                                                                                                                                                                                                                                                                                                                                                                                                                                                                                                                                                                                                                                                                                                                                                         |
| AGLPED         | alkyl-acyl glycerophosphocholine transferase                                                                                                           | $\text{ac}(\text{gluc}) + \text{Hgl} + \text{acetylgluc} \rightarrow \text{alkyl\_phol\_h2dc} + 2 \text{h2dc}(\text{gluc}) + \text{acetylgluc\_h2dc}$                                              | 0 |                                                                                        | 0     | 1000 |   | Glycerophospholipid Metabolism            |                                                                                                                                                                                                                                                                                                                                                                                                                                                                                                                                                                                                                                                                                                                                                                         |
| AGLPE1         | alkyl-acylglycerol phosphocholine transferase                                                                                                          | $\text{Hgl} + \text{acylglycerol} \rightarrow \text{acylglycerol} + \text{h2dc}(\text{gluc}) + \text{acetylgluc} + \text{h2dc\_h2dc}$                                                              | 0 |                                                                                        | 0     | 1000 |   | Glycerophospholipid Metabolism            |                                                                                                                                                                                                                                                                                                                                                                                                                                                                                                                                                                                                                                                                                                                                                                         |
| AGLPT1         | alkyl glycerol phosphocholine transferase                                                                                                              | $\text{h2dc}(\text{gluc}) + \text{alkyl\_phol} \rightarrow \text{phol}(\text{gluc}) + \text{h2dc\_h2dc}$                                                                                           | 0 |                                                                                        | 0     | 1000 |   | Glycerophospholipid Metabolism            |                                                                                                                                                                                                                                                                                                                                                                                                                                                                                                                                                                                                                                                                                                                                                                         |
| AGLPR          | alkyl glycerol phosphocholine transferase                                                                                                              | $\text{Hgl} + \text{phol}(\text{gluc}) + \text{alkyl\_phol} \rightarrow \text{acetylgluc} + \text{alkyl\_phol\_h2dc}$                                                                              | 0 |                                                                                        | 0     | 1000 |   | Glycerophospholipid Metabolism            |                                                                                                                                                                                                                                                                                                                                                                                                                                                                                                                                                                                                                                                                                                                                                                         |
| AGLPT          | alkyl glycerol phosphocholine transferase                                                                                                              | $\text{Hgl} + \text{phol}(\text{gluc}) + \text{Bosall}(\text{gluc}) \rightarrow \text{h2dc}(\text{gluc}) + \text{alkyl\_phol\_h2dc}$                                                               | 0 |                                                                                        | 0     | 1000 |   | Glycerophospholipid Metabolism            |                                                                                                                                                                                                                                                                                                                                                                                                                                                                                                                                                                                                                                                                                                                                                                         |
| AGMTm          | aspartase (mt)                                                                                                                                         | $\text{h2dc}(\text{gluc}) + \text{aspartic} \rightarrow \text{pyruvic} + \text{acetylgluc}$                                                                                                        | 0 | 79986.1                                                                                | 0     | 1000 |   | Aspartate and Pyruvate Metabolism         |                                                                                                                                                                                                                                                                                                                                                                                                                                                                                                                                                                                                                                                                                                                                                                         |
| AGPAT1         | 1-acylglycerol-3-phosphate O-acyltransferase 1                                                                                                         | $\text{Bosall}(\text{gluc}) + \text{alkyl\_phol}(\text{gluc}) \rightarrow \text{acetylgluc} + \text{phol\_phol}$                                                                                   | 0 | 52123.1 or 20308.1 or 20349.2 or 30979.1 or 47521.1 or 60252.1 or 102247.1             | 0     | 1000 |   | Triacylglycerol Synthesis                 |                                                                                                                                                                                                                                                                                                                                                                                                                                                                                                                                                                                                                                                                                                                                                                         |
| AGP6m          | N-acetyl-g-glutamyl-phosphocholine transferase, mitochondrial                                                                                          | $\text{Hgl} + \text{acetylgluc} + \text{acetylgluc} \rightarrow \text{acetylgluc} + \text{phol}(\text{gluc}) + \text{acetylgluc}$                                                                  | 0 | 56484.1                                                                                | 0     | 1000 |   | Urea cycle/urea cycle metabolism          |                                                                                                                                                                                                                                                                                                                                                                                                                                                                                                                                                                                                                                                                                                                                                                         |
| AGP6a          | alkylglycerone phosphocholine transferase                                                                                                              | $\text{alkyl\_phol\_h2dc} + \text{alkylphol}(\text{gluc}) \rightarrow \text{Hgl} + \text{Bosall}(\text{gluc}) + \text{alkyl\_phol\_h2dc}$                                                          | 0 | 22896.1                                                                                | 0     | 1000 |   | Glycerophospholipid Metabolism            |                                                                                                                                                                                                                                                                                                                                                                                                                                                                                                                                                                                                                                                                                                                                                                         |
| AGP6a          | alkyl glycerol phosphocholine transferase                                                                                                              | $\text{alkyl\_phol\_h2dc} \rightarrow \text{alkylphol\_h2dc}$                                                                                                                                      | 1 |                                                                                        | -1000 | 1000 |   | Transport, Pericentriolar                 |                                                                                                                                                                                                                                                                                                                                                                                                                                                                                                                                                                                                                                                                                                                                                                         |
| AGTm           | alkaline glyoxalase transaminase (transaminase, mitochondrial)                                                                                         | $\text{ala}(\text{gluc}) + \text{phol}(\text{gluc}) \rightarrow \text{pyruvic} + \text{phol}(\text{gluc})$                                                                                         | 0 | 246782.1 or 717360.1                                                                   | 0     | 1000 |   | Alanine and Aspartate Metabolism          |                                                                                                                                                                                                                                                                                                                                                                                                                                                                                                                                                                                                                                                                                                                                                                         |
| AGTm           | alkaline glyoxalase transaminase (transaminase, mitochondrial)                                                                                         | $\text{ala}(\text{gluc}) + \text{phol}(\text{gluc}) \rightarrow \text{pyruvic} + \text{phol}(\text{gluc})$                                                                                         | 0 | 11681.1                                                                                | 0     | 1000 |   | Alanine and Aspartate Metabolism          |                                                                                                                                                                                                                                                                                                                                                                                                                                                                                                                                                                                                                                                                                                                                                                         |
| AHNEMOSTANGLCw | glucuronidated compound transport                                                                                                                      | $\text{h2dc}(\text{gluc}) + \text{myel}(\text{gluc}) + \text{ahdnemostangl}(\text{gluc}) \rightarrow \text{acetylgluc} + \text{Hgl} + \text{ala}(\text{gluc}) + \text{ahdnemostangl}(\text{gluc})$ | 0 | 17295.1                                                                                | 0     | 1000 |   | Transport, Extracellular                  |                                                                                                                                                                                                                                                                                                                                                                                                                                                                                                                                                                                                                                                                                                                                                                         |
| AHNEMOSTANGLCw | glucuronidated compound transport                                                                                                                      | $\text{ahdnemostangl}(\text{gluc}) \rightarrow \text{ahdnemostangl}(\text{gluc})$                                                                                                                  | 1 |                                                                                        | -1000 | 1000 |   | Transport, Endoplasmic Reticulum          |                                                                                                                                                                                                                                                                                                                                                                                                                                                                                                                                                                                                                                                                                                                                                                         |
| ABC            | adenosine/adenosine                                                                                                                                    | $\text{h2dc}(\text{gluc}) + \text{h2dc}(\text{gluc}) \rightarrow \text{acetylgluc} + \text{h2dc\_h2dc}$                                                                                            | 1 | 227500.1 or 227509.2 or 30979.1                                                        | -1000 | 1000 |   | Metabolism Metabolism                     |                                                                                                                                                                                                                                                                                                                                                                                                                                                                                                                                                                                                                                                                                                                                                                         |
| ABCYm          | 5-adenosyl-L-homocysteine nucleic transport                                                                                                            | $\text{acetylgluc}(\text{gluc}) \rightarrow \text{acetylgluc}$                                                                                                                                     | 1 |                                                                                        | -1000 | 1000 |   | Transport, Nucleus                        |                                                                                                                                                                                                                                                                                                                                                                                                                                                                                                                                                                                                                                                                                                                                                                         |
| ABCYm          | 5-Adenosyl-L-homocysteine intracellular efflux                                                                                                         | $\text{acetylgluc}(\text{gluc}) \rightarrow \text{acetylgluc}$                                                                                                                                     | 1 |                                                                                        | -1000 | 1000 |   | Transport, Endoplasmic Reticulum          |                                                                                                                                                                                                                                                                                                                                                                                                                                                                                                                                                                                                                                                                                                                                                                         |
| AHEXASR2y      | beta-N-acetylglucosaminidase, lysosomal                                                                                                                | $3 \text{h2dc}(\text{gluc}) + \text{ahexasr2y}(\text{gluc}) \rightarrow 3 \text{acetylgluc} + \text{acetylgluc}$                                                                                   | 0 | 15211.1 or 15212.1 or 15212.1 and 15213.1                                              | 0     | 1000 |   | N-Glycan Degradation                      |                                                                                                                                                                                                                                                                                                                                                                                                                                                                                                                                                                                                                                                                                                                                                                         |
| AHEXASR2y      | beta-N-acetylglucosaminidase, lysosomal                                                                                                                | $2 \text{h2dc}(\text{gluc}) + \text{ahexasr2y}(\text{gluc}) \rightarrow 2 \text{acetylgluc} + \text{acetylgluc}$                                                                                   | 0 | 15211.1 or 15212.1 or 15212.1 and 15213.1                                              | 0     | 1000 |   | N-Glycan Degradation                      |                                                                                                                                                                                                                                                                                                                                                                                                                                                                                                                                                                                                                                                                                                                                                                         |
| AIACAT         | phosphocholine/aminocarbonylcarbamate transferase                                                                                                      | $\text{phol}(\text{gluc}) + \text{acetylgluc} \rightarrow \text{phol}(\text{gluc}) + \text{Hgl}(\text{gluc})$                                                                                      | 1 | 108147.1                                                                               | -1000 | 1000 |   | IMP Biosynthesis                          |                                                                                                                                                                                                                                                                                                                                                                                                                                                                                                                                                                                                                                                                                                                                                                         |
| AIACAT         | phosphocholine/aminocarbonylcarbamate transferase                                                                                                      | $\text{acetylgluc} + \text{acetylgluc} \rightarrow \text{Hgl} + \text{h2dc}(\text{gluc})$                                                                                                          | 1 | 47084.1                                                                                | -1000 | 1000 |   | IMP Biosynthesis                          |                                                                                                                                                                                                                                                                                                                                                                                                                                                                                                                                                                                                                                                                                                                                                                         |
| AKGLCHOL1      | 1 alkyl 2 lysophosphatidyl 3-phosphocholine (theta repeat) transport                                                                                   | $\text{alkylphol\_h2dc}(\text{gluc}) \rightarrow \text{alkylphol\_h2dc}$                                                                                                                           | 1 |                                                                                        | -1000 | 1000 |   | Transport, Extracellular                  |                                                                                                                                                                                                                                                                                                                                                                                                                                                                                                                                                                                                                                                                                                                                                                         |
| AKG2m          | 2-oxoglutarate dehydrogenase                                                                                                                           | $\text{acetylgluc} + \text{acetylgluc} + \text{malic}(\text{gluc}) \rightarrow \text{acetylgluc} + \text{malic}(\text{gluc}) + \text{succinyl}(\text{gluc})$                                       | 0 | 73020.1 or 15201.1 or 27462.1 and 15202.1 or 142925.1                                  | 0     | 1000 |   | Citric Acid Cycle                         |                                                                                                                                                                                                                                                                                                                                                                                                                                                                                                                                                                                                                                                                                                                                                                         |
| AKOMAm         | alkali-komamycin nucleic transport                                                                                                                     | $\text{acetylgluc} + \text{mal}(\text{gluc}) \rightarrow \text{acetylgluc} + \text{mal}(\text{gluc})$                                                                                              | 1 | 47083.1                                                                                | -1000 | 1000 |   | Transport, Mitochondrial                  |                                                                                                                                                                                                                                                                                                                                                                                                                                                                                                                                                                                                                                                                                                                                                                         |
| AKO4_3         | AKO transport via sodium co-transport                                                                                                                  | $3 \text{mal}(\text{gluc}) + \text{acetylgluc} \rightarrow \text{acetylgluc} + 3 \text{mal}(\text{gluc})$                                                                                          | 1 | 114444.1 or 144444.2                                                                   | -1000 | 1000 |   | Transport, Extracellular                  |                                                                                                                                                                                                                                                                                                                                                                                                                                                                                                                                                                                                                                                                                                                                                                         |
| AKOp           | AKO transport, glutamine                                                                                                                               | $\text{acetylgluc} \rightarrow \text{acetylgluc}$                                                                                                                                                  | 1 |                                                                                        | -1000 | 1000 |   | Transport, Pericentriolar                 |                                                                                                                                                                                                                                                                                                                                                                                                                                                                                                                                                                                                                                                                                                                                                                         |
| AKRC1          | alkali-komamycin family 1, member C1 (chloride ion reduction, 1-alkali-komamycin dehydrogenase, type 1, dihydrofolate dehydrogenase)                   | $\text{Hgl} + \text{acetylgluc} + \text{acetylgluc} \rightarrow \text{acetylgluc} + \text{acetylgluc}$                                                                                             | 0 | 77377.1                                                                                | 0     | 1000 |   | Steroid Metabolism                        |                                                                                                                                                                                                                                                                                                                                                                                                                                                                                                                                                                                                                                                                                                                                                                         |
| AKRC141        | alkali-komamycin family 1, member C4 (chloride ion reduction, 1-alkali-komamycin dehydrogenase, type 1, dihydrofolate dehydrogenase)                   | $\text{Hgl} + \text{malic}(\text{gluc}) + \text{malic}(\text{gluc}) \rightarrow \text{malic}(\text{gluc}) + \text{malic}(\text{gluc})$                                                             | 0 | 87922.1                                                                                | 0     | 1000 |   | Bile Acid Biosynthesis                    |                                                                                                                                                                                                                                                                                                                                                                                                                                                                                                                                                                                                                                                                                                                                                                         |
| AKRC142        | alkali-komamycin family 1, member C4 (chloride ion reduction, 1-alkali-komamycin dehydrogenase, type 1, dihydrofolate dehydrogenase)                   | $\text{Hgl} + \text{malic}(\text{gluc}) + \text{malic}(\text{gluc}) \rightarrow \text{malic}(\text{gluc}) + \text{malic}(\text{gluc})$                                                             | 0 | 87922.1                                                                                | 0     | 1000 |   | Bile Acid Biosynthesis                    |                                                                                                                                                                                                                                                                                                                                                                                                                                                                                                                                                                                                                                                                                                                                                                         |
| AKR1D          | alkali-komamycin family 1, member D1 (delta 4-5 ketoreductase 5 beta reduction)                                                                        | $\text{Hgl} + \text{acetylgluc} \rightarrow \text{malic}(\text{gluc}) + \text{malic}(\text{gluc})$                                                                                                 | 0 | 200405.1                                                                               | 0     | 1000 |   | Bile Acid Biosynthesis                    |                                                                                                                                                                                                                                                                                                                                                                                                                                                                                                                                                                                                                                                                                                                                                                         |
| AKR1D2         | alkali-komamycin family 1, member D1 (delta 4-5 ketoreductase 5 beta reduction)                                                                        | $\text{Hgl} + \text{acetylgluc} + \text{malic}(\text{gluc}) \rightarrow \text{malic}(\text{gluc}) + \text{malic}(\text{gluc})$                                                                     | 0 | 200405.1                                                                               | 0     | 1000 |   | Bile Acid Biosynthesis                    |                                                                                                                                                                                                                                                                                                                                                                                                                                                                                                                                                                                                                                                                                                                                                                         |
| ALAALACN       | ALAALACN                                                                                                                                               | $\text{h2dc}(\text{gluc}) + \text{alaalacn}(\text{gluc}) \rightarrow 2 \text{ala}(\text{gluc})$                                                                                                    | 1 | (334001.1 or 60004.1)                                                                  | -1000 | 1000 | 4 | Dipeptide Degradation                     | Dipeptides and tripeptides enter the brush border of the intestinal mucosal cells, where they are hydrolyzed for four amino acids, which are then transported into hepatic portal vein. Peptides entering by transcellular or paracellular mechanisms elicit allergic reactions in food (Buller, R. Murray, David A. Bonner, Kathleen M. Buller, Peter J. Kennedy, Victor W. Ruchaud, P. Anthony Weil (2001) 26th edition, Harper's Illustrated Biochemistry, 3rd edn, page 662). Enzymes and hydrolysis of dipeptides is a reversible process (David L. Nelson, Michael M. Cox, Lehninger principles of biochemistry (2005), 3rd edition, worth publishers, page 69, Figure 36.1 CNI) is expressed in brain where an ODC is more abundantly expressed (EMBL: 1471076). |
| ALAALAPPT1n    | transport of Alanine by the apical PEPT1 amino acid transporter across the brush border cells of the enterocytes of the intestine and renal cells      | $\text{alaalacn} + \text{Hgl} \rightarrow \text{Hgl} + \text{alaalacn}$                                                                                                                            | 0 | 215335.1                                                                               | 0     | 1000 | 3 | Transport, Lumen                          | PEPT1 appears to transport all di- and tri- peptides across the brush border of the intestinal cells (Ginsberg, R. Groppe, Jack L. Smith, James L. Goff (2000) Advanced nutrition and human metabolism, Wile-Interscience, 5th edition, page 193). PEPT1 is expressed highly in intestinal cells where as PEPT2 is localized to renal cells (PMID: 10103047).                                                                                                                                                                                                                                                                                                                                                                                                           |
| ALASNNGLa      | L-alanine L-serine Na-dependent exchange (ABC-Lin)                                                                                                     | $\text{mal}(\text{gluc}) + \text{ser}(\text{gluc}) + \text{ala}(\text{gluc}) \rightarrow \text{mal}(\text{gluc}) + \text{ala}(\text{gluc}) + \text{ser}(\text{gluc})$                              | 0 | 20514.1                                                                                | 0     | 1000 |   | Transport, Extracellular                  |                                                                                                                                                                                                                                                                                                                                                                                                                                                                                                                                                                                                                                                                                                                                                                         |
| ALAATBm        | transport of L-Alanine into the intestinal cells by ATB0 transporter                                                                                   | $2 \text{mal}(\text{gluc}) + \text{c}(\text{gluc}) + \text{ala}(\text{gluc}) \rightarrow 2 \text{mal}(\text{gluc}) + \text{c}(\text{gluc}) + \text{ala}(\text{gluc})$                              | 0 | 56774.1                                                                                | 0     | 1000 | 3 | Transport, Lumen                          | ATB0 is both sodium and chloride coupled, with reactive mechanism 2Na+:1cl- limited acid. The transporter is localized to the intestine, has a broad substrate specificity both neutral and cationic amino acids, but is not involved in the transport of aspartate, glutamate and proline (PMID: 1015008).                                                                                                                                                                                                                                                                                                                                                                                                                                                             |
| ALACYDmGLa     | L-alanine-L-serine Na-dependent exchange (ABC-Lin)                                                                                                     | $\text{mal}(\text{gluc}) + \text{ala}(\text{gluc}) + \text{cys}(\text{gluc}) \rightarrow \text{mal}(\text{gluc}) + \text{ala}(\text{gluc}) + \text{cys}(\text{gluc})$                              | 0 | 20514.1 or 59963.1                                                                     | 0     | 1000 |   | Transport, Extracellular                  |                                                                                                                                                                                                                                                                                                                                                                                                                                                                                                                                                                                                                                                                                                                                                                         |
| ALACDYNm       | L-alanine-glutamate reversible exchange                                                                                                                | $\text{phol}(\text{gluc}) + \text{ala}(\text{gluc}) \rightarrow \text{phol}(\text{gluc}) + \text{ala}(\text{gluc})$                                                                                | 1 | 53995.1 or 17254.1                                                                     | -1000 | 1000 |   | Transport, Extracellular                  |                                                                                                                                                                                                                                                                                                                                                                                                                                                                                                                                                                                                                                                                                                                                                                         |
| ALACDYNm       | D-alanine-glutamate reversible exchange                                                                                                                | $\text{ala}(\text{gluc}) + \text{phol}(\text{gluc}) \rightarrow \text{ala}(\text{gluc}) + \text{phol}(\text{gluc})$                                                                                | 1 | 53995.1 or 17254.1                                                                     | -1000 | 1000 |   | Transport, Extracellular                  |                                                                                                                                                                                                                                                                                                                                                                                                                                                                                                                                                                                                                                                                                                                                                                         |
| ALADPATn       | transport of D-Alanine by the apical PAT2 or PAT1 amino acid transporter in kidney and intestine                                                       | $\text{Hgl} + \text{ala}(\text{gluc}) \rightarrow \text{Hgl} + \text{ala}(\text{gluc})$                                                                                                            | 0 | 215335.1                                                                               | 0     | 1000 | 3 | Transport, Lumen                          | PAT2 is strongly expressed in heart and lung and more weakly in kidney and muscle (PMID: 1015008, PMID: 1040002, PMID: 1040002). PAT2 does not strongly discriminate between L and D isomers (PMID: 1040002). PAT2 protein amino acid co-transporter with 1:1 stoichiometry, does not discriminate between L and D isomers, located on the apical membrane of kidney and intestine (PMID: 1040002, PMID: 1015008).                                                                                                                                                                                                                                                                                                                                                      |
| ALAGENNGLa     | L-alanine-L-glutamate Na-dependent exchange (ABC-Lin)                                                                                                  | $\text{mal}(\text{gluc}) + \text{ala}(\text{gluc}) + \text{phol}(\text{gluc}) \rightarrow \text{mal}(\text{gluc}) + \text{ala}(\text{gluc}) + \text{phol}(\text{gluc})$                            | 0 | 24014.1                                                                                | 0     | 1000 |   | Transport, Extracellular                  |                                                                                                                                                                                                                                                                                                                                                                                                                                                                                                                                                                                                                                                                                                                                                                         |
| ALAGENNGLa     | L-alanine-glutamate reversible exchange                                                                                                                | $\text{ala}(\text{gluc}) + \text{phol}(\text{gluc}) \rightarrow \text{ala}(\text{gluc}) + \text{phol}(\text{gluc})$                                                                                | 1 | 53995.1 or 17254.1                                                                     | -1000 | 1000 |   | Transport, Extracellular                  |                                                                                                                                                                                                                                                                                                                                                                                                                                                                                                                                                                                                                                                                                                                                                                         |
| ALAGLYm        | L-alanine-glutamate reversible exchange                                                                                                                | $\text{ala}(\text{gluc}) + \text{phol}(\text{gluc}) \rightarrow \text{ala}(\text{gluc}) + \text{phol}(\text{gluc})$                                                                                | 1 | 53995.1 or 17254.1                                                                     | -1000 | 1000 |   | Transport, Extracellular                  |                                                                                                                                                                                                                                                                                                                                                                                                                                                                                                                                                                                                                                                                                                                                                                         |
| ALAEALATn      | transport of L-Alanine into the cell and efflux of L-Alanine out of the cell by LAT2 or LAT1 in the brush border surface of kidney and intestine       | $\text{ala}(\text{gluc}) + \text{ala}(\text{gluc}) \rightarrow \text{ala}(\text{gluc}) + \text{ala}(\text{gluc})$                                                                                  | 0 | (20579.1 or 17254.1)                                                                   | 0     | 1000 | 3 | Transport, Lumen                          | Phages Arch-Eur J Physiol (2000) 440:503-512 DOI: 10.1007/s000300000074, PMID: 1015008, J Am Soc Nephrol 14: 817-847, 200, Phages Arch-Eur J Physiol (2003) 445:529-531 DOI: 10.1007/s000300000074, PMID: 1015008, Am J Physiol (2001) 281:C1077-C1085.                                                                                                                                                                                                                                                                                                                                                                                                                                                                                                                 |
| ALALPATn       | transport of L-Alanine by the apical PAT2 or PAT1 amino acid transporter in kidney and intestine                                                       | $\text{Hgl} + \text{ala}(\text{gluc}) \rightarrow \text{Hgl} + \text{ala}(\text{gluc})$                                                                                                            | 0 | 215335.1                                                                               | 0     | 1000 | 3 | Transport, Lumen                          | PAT2 is strongly expressed in heart and lung and more weakly in kidney and muscle (PMID: 1040002). PAT2 does not strongly discriminate between L and D isomers (PMID: 1040002). PAT2 protein amino acid co-transporter with 1:1 stoichiometry, does not discriminate between L and D isomers, located on the apical membrane of kidney and intestine (PMID: 1040002, PMID: 1015008).                                                                                                                                                                                                                                                                                                                                                                                    |
| ALAPHELATn     | transport of L-Alanine into the cell and efflux of L-Phenylalanine out of the cell by LAT2 or LAT1 in the brush border surface of kidney and intestine | $\text{ala}(\text{gluc}) + \text{phe}(\text{gluc}) \rightarrow \text{ala}(\text{gluc}) + \text{phe}(\text{gluc})$                                                                                  | 0 | (20579.1 or 17254.1)                                                                   | 0     | 1000 | 3 | Transport, Extracellular                  | Phages Arch-Eur J Physiol (2000) 440:503-512 DOI: 10.1007/s000300000074, PMID: 1015008, J Am Soc Nephrol 14: 817-847, 200, Phages Arch-Eur J Physiol (2003) 445:529-531 DOI: 10.1007/s000300000074, PMID: 1015008, Am J Physiol (2001) 281:C1077-C1085.                                                                                                                                                                                                                                                                                                                                                                                                                                                                                                                 |
| ALAR           | alanine racemase                                                                                                                                       | $\text{ala}(\text{gluc}) \rightarrow \text{ala}(\text{gluc})$                                                                                                                                      | 1 | 114063.1                                                                               | -1000 | 1000 |   | Alanine and Aspartate Metabolism          |                                                                                                                                                                                                                                                                                                                                                                                                                                                                                                                                                                                                                                                                                                                                                                         |
| ALASERNGLa     | L-alanine-L-serine Na-dependent exchange (ABC-Lin)                                                                                                     | $\text{mal}(\text{gluc}) + \text{ala}(\text{gluc}) + \text{ser}(\text{gluc}) \rightarrow \text{mal}(\text{gluc}) + \text{ala}(\text{gluc}) + \text{ser}(\text{gluc})$                              | 0 | 20514.1 or 59963.1                                                                     | 0     | 1000 |   | Transport, Extracellular                  |                                                                                                                                                                                                                                                                                                                                                                                                                                                                                                                                                                                                                                                                                                                                                                         |
| ALANm          | N-acetylserine synthase                                                                                                                                | $\text{Hgl} + \text{cys}(\text{gluc}) + \text{acetylgluc} \rightarrow \text{acetylgluc} + \text{cys}(\text{gluc}) + \text{h2dc}(\text{gluc})$                                                      | 0 | 20512.1 or 11405.1 or 114063.1 or 11405.2                                              | 0     | 1000 |   | Glycine, Serine, and Threonine Metabolism |                                                                                                                                                                                                                                                                                                                                                                                                                                                                                                                                                                                                                                                                                                                                                                         |
| ALATA_L        | L-alanine transaminase                                                                                                                                 | $\text{acetylgluc} + \text{ala}(\text{gluc}) \rightarrow \text{pyruvic} + \text{phol}(\text{gluc})$                                                                                                | 1 | 808652.1 or 76282.1                                                                    | -1000 | 1000 |   | Glucone metabolism                        |                                                                                                                                                                                                                                                                                                                                                                                                                                                                                                                                                                                                                                                                                                                                                                         |
| ALATBmGLa      | L-alanine-L-serine Na-dependent exchange (ABC-Lin)                                                                                                     | $\text{mal}(\text{gluc}) + \text{ala}(\text{gluc}) + \text{ser}(\text{gluc}) \rightarrow \text{mal}(\text{gluc}) + \text{ala}(\text{gluc}) + \text{ser}(\text{gluc})$                              | 0 | 20514.1 or 59963.1                                                                     | 0     | 1000 |   | Transport, Extracellular                  |                                                                                                                                                                                                                                                                                                                                                                                                                                                                                                                                                                                                                                                                                                                                                                         |
| ALAD2          | L-alanine reversible transport via proton symporter                                                                                                    | $\text{Hgl} + \text{ala}(\text{gluc}) \rightarrow \text{Hgl} + \text{ala}(\text{gluc})$                                                                                                            | 1 | 215335.1                                                                               | -1000 | 1000 |   | Transport, Extracellular                  |                                                                                                                                                                                                                                                                                                                                                                                                                                                                                                                                                                                                                                                                                                                                                                         |
| ALACSL         | L-alanine reversible transport via proton symporter (Proton)                                                                                           | $\text{Hgl} + \text{ala}(\text{gluc}) \rightarrow \text{Hgl} + \text{ala}(\text{gluc})$                                                                                                            | 1 | 215335.1                                                                               | -1000 | 1000 |   | Transport, Lysosomal                      |                                                                                                                                                                                                                                                                                                                                                                                                                                                                                                                                                                                                                                                                                                                                                                         |
| ALAM           | Alanine-Sodium symporter                                                                                                                               | $\text{mal}(\text{gluc}) + \text{ala}(\text{gluc}) \rightarrow \text{mal}(\text{gluc}) + \text{ala}(\text{gluc})$                                                                                  | 0 | 107277.1 or 67661.1 or 40594.1 or 56774.1 or 17980.1 or 17980.1 or 17987.1             | 0     | 1000 |   | Transport, Extracellular                  |                                                                                                                                                                                                                                                                                                                                                                                                                                                                                                                                                                                                                                                                                                                                                                         |
| ALAMa          | transport of L-Alanine by the apical neutral amino acid transporter in kidney and intestine                                                            | $\text{mal}(\text{gluc}) + \text{ala}(\text{gluc}) \rightarrow \text{mal}(\text{gluc}) + \text{ala}(\text{gluc})$                                                                                  | 0 | (70083.1 or 74318.1 or 73704.1)                                                        | 0     | 1000 | 3 | Transport, Lumen                          | Transports all the neutral amino acids with preference for methionine, leucine and valine. Reaction stoichiometry is 1:1. Regulates transmembrane transport with cells expressing for increased affinity. Found in kidney and intestine, however also reported to be expressed in skin. Regulates association with ALC2 for expression in intestine, but with cell surface expression in kidney.                                                                                                                                                                                                                                                                                                                                                                        |
| ALAMU          | Alanine transport (Na, H coupled)                                                                                                                      | $\text{Hgl} + 2 \text{ala}(\text{gluc}) + \text{ala}(\text{gluc}) \rightarrow \text{Hgl} + 2 \text{ala}(\text{gluc}) + \text{ala}(\text{gluc})$                                                    | 1 | 200875.1 or 76257.1                                                                    | -1000 | 1000 |   | Transport, Extracellular                  |                                                                                                                                                                                                                                                                                                                                                                                                                                                                                                                                                                                                                                                                                                                                                                         |
| ALALATn        | transport of L-Alanine by y-LAT1 or y-LAT2 transporters in renal intestine and kidney                                                                  | $\text{mal}(\text{gluc}) + \text{ala}(\text{gluc}) + \text{arg}(\text{gluc}) \rightarrow \text{mal}(\text{gluc}) + \text{ala}(\text{gluc}) + \text{arg}(\text{gluc})$                              | 0 | (20540.1 or 130836.1 or 17254.1)                                                       | 0     | 1000 | 3 | Transport, Extracellular                  | y-LAT1 and y-LAT2 transporters regulate CD98 for upregulation in the plasma membrane. Act as an anionic acid exchanger, with efflux of neutral amino acids and efflux of cationic amino acid, requires Na+ for optimal activity. Can also operate with Na+ in absence of Na+ (PMID: 1146663).                                                                                                                                                                                                                                                                                                                                                                                                                                                                           |
| ALALATn        | transport of Alanine by y-LAT1 or y-LAT2 with co-transporter of Na small intestine and kidney                                                          | $\text{Hgl} + \text{ala}(\text{gluc}) + \text{arg}(\text{gluc}) \rightarrow \text{Hgl} + \text{ala}(\text{gluc}) + \text{arg}(\text{gluc})$                                                        | 0 | (20540.1 or 130836.1 or 17254.1)                                                       | 0     | 1000 | 3 | Transport, Extracellular                  | y-LAT1 and y-LAT2 transporters regulate CD98 for upregulation in the plasma membrane. Act as an anionic acid exchanger, with efflux of neutral amino acids and efflux of cationic amino acid, requires Na+ for optimal activity. Can also operate with Na+ in absence of Na+ (PMID: 1146663).                                                                                                                                                                                                                                                                                                                                                                                                                                                                           |









|             |                                                                                                                                                                |                                                                                                      |   |                                                                                          |       |      |   |                                              |                                                                                                                                                                                                                                           |
|-------------|----------------------------------------------------------------------------------------------------------------------------------------------------------------|------------------------------------------------------------------------------------------------------|---|------------------------------------------------------------------------------------------|-------|------|---|----------------------------------------------|-------------------------------------------------------------------------------------------------------------------------------------------------------------------------------------------------------------------------------------------|
| CARD9       | beta-carotene transport via diffusion                                                                                                                          | $card9[c] \leftrightarrow card9[c]$                                                                  | 1 |                                                                                          | -1000 | 1000 |   | Transport, Extracellular                     |                                                                                                                                                                                                                                           |
| CARDPPT1c   | transport of L-Carnitine by the apical PPT1<br>amino acid transporters across the brush border<br>cells of the enterocytes of the intestine and renal<br>cells | $h[c] + carn[c] \rightarrow h[c] + carn[c]$                                                          | 0 | 215338.1                                                                                 | 0     | 1000 | 3 | Transport, Lumen                             | PMID: 15888466, PMID: 14965522,<br>PMID: 14977407, PMID: 10133047                                                                                                                                                                         |
| CARDPPT1a   | neurotrophic transport                                                                                                                                         | $cardp[cl] \leftrightarrow cardp[cl]$                                                                | 1 |                                                                                          | -1000 | 1000 |   | Transport, Extracellular                     |                                                                                                                                                                                                                                           |
| CARDP1c     | transport of L-Carnitine by MPT1 or MPT4<br>peptide transporter                                                                                                | $carn[c] \rightarrow h[c] + carn[c]$                                                                 | 0 | 105221.1 or 105961.1                                                                     | 0     | 1000 | 3 | Transport, Lysosomal                         | PMID: 14285571, PMID: 1268526,<br>PMID: 17641807                                                                                                                                                                                          |
| CAT2c       | cathepsin A, intracellular (absent)                                                                                                                            | $h2cat[c] + cat[c] \rightarrow cat[c] + 2 h2cat[c]$                                                  | 0 | 12399.1                                                                                  | 0     | 1000 |   | Glycocalyx/Glycosaminoglycan                 |                                                                                                                                                                                                                                           |
| CAT2a       | cathepsin A                                                                                                                                                    | $2 h2cat[c] \leftrightarrow cat[c] + 2 h2cat[c]$                                                     | 0 | 12399.1                                                                                  | 0     | 1000 |   | BCN Degradation                              |                                                                                                                                                                                                                                           |
| CAT3c       | cathepsin A, intracellular                                                                                                                                     | $2 h2cat[c] \rightarrow cat[c] + 2 h2cat[c]$                                                         | 0 | 12399.1                                                                                  | 0     | 1000 |   | Mitochondrion                                |                                                                                                                                                                                                                                           |
| CAT5        | calcium - sodium transporter (3-5), reversible                                                                                                                 | $1 na[c] + cat5[c] \leftrightarrow 3 na[c] + cat5[c]$                                                | 1 | 110891.1 or 110891.2<br>or 110891.1 or 20641.1<br>or 110891.4 or 110891.5<br>or 110891.6 | -1000 | 1000 |   | Transport, Extracellular                     |                                                                                                                                                                                                                                           |
| CEL2OR      | Na/K/ATPase/Bioluminescence                                                                                                                                    | $h[c] + na[c] + 2 k[c] + cel2[c] \rightarrow 2 h2cat[c] + na[c] + 2 k[c]$                            | 0 |                                                                                          | 0     | 1000 |   | Vitamin B12 Metabolism                       |                                                                                                                                                                                                                                           |
| CEL2ac      | Catecholamine transport, intracellular                                                                                                                         | $cel2ac[c] \leftrightarrow cel2ac[c]$                                                                | 0 | 109136.1                                                                                 | 0     | 1000 |   | Transport, Mitochondrial                     |                                                                                                                                                                                                                                           |
| CEL31m      | catecholamine adrenergic transmission, intracellular                                                                                                           | $h[c] + ep[cl] + cel31[m] \leftrightarrow adrenergic + ep[cl]$                                       | 1 | 109136.1                                                                                 | -1000 | 1000 |   | Vitamin B12 Metabolism                       |                                                                                                                                                                                                                                           |
| CHT1Dc_r    | release of B12 by simple diffusion, reversible                                                                                                                 | $adsh[c] \leftrightarrow adsh[c]$                                                                    | 1 |                                                                                          | -1000 | 1000 | 1 | Transport, Extracellular                     | Sauer S, Gressner Jack L, Smith<br>James L, Groll (2005) Advanced<br>nutrition and human metabolism,<br>Wiley-Blackwell company, London, 5th<br>edition, page 159-160, AB: Made<br>this one irreversible for my<br>model's functionality. |
| CHD6a       | transport of Adrenycholobolins into the intestine                                                                                                              | $adsh[c] \rightarrow adsh[c]$                                                                        | 0 | 144031.1 or 40969.1 or<br>50083.1                                                        | 0     | 1000 | 3 | Transport, Lumen                             | PMID: 15820139, Sauer<br>Zephora, Robert B, Becker, Donald<br>B, McCannick, John W, Smith<br>(2005) Handbook of nutrition, CRC<br>press, chapter 13, page 418-422                                                                         |
| CHP1a       | Carbonate phosphate phosphatransferase,<br>mitochondrial, catalase                                                                                             | $h[c] + chp1[c] + phs-[cl] \rightarrow cat[c] + php[c] + chp1[c]$                                    | 0 | 14378.1 or 14377.1 or<br>46813.1                                                         | 0     | 1000 |   | Glycolysis/Gluconeogenesis                   |                                                                                                                                                                                                                                           |
| CHP2c       | carbonate phosphate cytochrome (phospho-<br>hydrolyase)                                                                                                        | $h2cat[c] + 2 php[c] + hsc-[cl] + phs-[cl] \rightarrow 2 h2cat[c] + 2 h2cat[c] + phs-[cl] + chp1[c]$ | 0 | 46779.1                                                                                  | 0     | 1000 |   | Pyridoxine Metabolism                        |                                                                                                                                                                                                                                           |
| CHP2m       | carbonate phosphate cytochrome (cytochrome<br>catalase)                                                                                                        | $2 na[c] + hsc-[cl] + h2cat[c] + 2 h2cat[c] + 2 h2cat[c] + phs-[cl] + chp1[c]$                       | 0 | 227233.1 or 227233.2                                                                     | 0     | 1000 |   | Glutamine metabolism                         |                                                                                                                                                                                                                                           |
| CHP3a       | carbonate phosphate transporter, cytoplasmic<br>catalase                                                                                                       | $phs[c] + php[c] + chp3[c] \leftrightarrow php[c] + phs[c] + php[c]$                                 | 1 |                                                                                          | -1000 | 1000 |   | Transport, Endoplasmic Reticulum             |                                                                                                                                                                                                                                           |
| CHB1        | Carbonol reductase (NADPH1)                                                                                                                                    | $h[c] + na[c] + chb1[c] \rightarrow prp[cl] + na[c] + prp[cl]$                                       | 0 | 12406.1                                                                                  | 0     | 1000 |   | Ecumenical Metabolism                        |                                                                                                                                                                                                                                           |
| CHB2        | Carbonol reductase (NADPH2)                                                                                                                                    | $h[c] + na[c] + chb2[c] \rightarrow prp[cl] + na[c] + prp[cl]$                                       | 0 | 12406.1                                                                                  | 0     | 1000 |   | Ecumenical Metabolism                        |                                                                                                                                                                                                                                           |
| CCA1Dn      | Calcitonin acid transport from cytosol                                                                                                                         | $cca1Dn[c] \rightarrow cca1Dn[c]$                                                                    | 0 |                                                                                          | 0     | 1000 |   | Transport, Extracellular                     |                                                                                                                                                                                                                                           |
| CCA1Dm      | Calcitonin acid transport from mitochondria                                                                                                                    | $cca1Dm[c] \rightarrow cca1Dm[c]$                                                                    | 0 |                                                                                          | 0     | 1000 |   | Transport, Mitochondrial                     |                                                                                                                                                                                                                                           |
| CHP1P       | phosphatidylcholine transporter (from cytosol)                                                                                                                 | $chp1p[c] + na[c] \rightarrow h[c] + na[c] + chp1p[c]$                                               | 1 | 52009.1 or 52009.2                                                                       | -1000 | 1000 |   | Glycerophospholipid Metabolism               |                                                                                                                                                                                                                                           |
| CHP1aCm     | phosphatidylcholine transporter                                                                                                                                | $chp1aCm[c] \leftrightarrow chp1aCm[c]$                                                              | 1 |                                                                                          | -1000 | 1000 |   | Transport, Mitochondrial                     |                                                                                                                                                                                                                                           |
| CHN         | phosphatidylcholine cytochrome                                                                                                                                 | $h2c[c] + chn[c] \rightarrow chn[c] + h2c[c]$                                                        | 0 | 74590.1                                                                                  | 0     | 1000 |   | Glycerophospholipid Metabolism               |                                                                                                                                                                                                                                           |
| CHNn        | phosphatidylcholine cytochrome                                                                                                                                 | $h2c[c] + chn[n] + ps-[cl] \rightarrow chn[n] + ps-[cl]$                                             | 0 | 110991.1                                                                                 | 0     | 1000 |   | Glycerophospholipid Metabolism               |                                                                                                                                                                                                                                           |
| CHPC        | cholesterol phosphatransferase                                                                                                                                 | $chpc[c] + dug-[cl] + h2c[c] \rightarrow h2c[c] + chpc[c]$                                           | 0 | 212662.1 or 997512.1                                                                     | 0     | 1000 |   | Glycerophospholipid Metabolism               |                                                                                                                                                                                                                                           |
| CHPE        | cholesterol phosphatransferase                                                                                                                                 | $chpe[c] + dug-[cl] + h2c[c] \rightarrow ps-[cl] + h2c[c]$                                           | 0 | 997512.1                                                                                 | 0     | 1000 |   | Glycerophospholipid Metabolism               |                                                                                                                                                                                                                                           |
| CHB3        | cholesterol kinase                                                                                                                                             | $php[c] + chb3[c] \rightarrow php[c] + h2c[c] + chp1p[c]$                                            | 0 | 223753.1 or 223753.2                                                                     | 0     | 1000 |   | Sphingolipid Metabolism                      |                                                                                                                                                                                                                                           |
| CHRT1a      | ceramide transporter protein                                                                                                                                   | $cmh-[cl] \leftrightarrow cmh-[cl]$                                                                  | 1 | 46818.1                                                                                  | -1000 | 1000 |   | Transport, Golgi Apparatus                   |                                                                                                                                                                                                                                           |
| CHRT1a      | ceramide transporter protein                                                                                                                                   | $cmh-[cl] \leftrightarrow cmh-[cl]$                                                                  | 1 | 46818.1                                                                                  | -1000 | 1000 |   | Transport, Endoplasmic Reticulum             |                                                                                                                                                                                                                                           |
| CHRT1a      | ceramide transporter protein                                                                                                                                   | $glash-[cl] \leftrightarrow glash-[cl]$                                                              | 1 | 46818.1                                                                                  | -1000 | 1000 |   | Transport, Golgi Apparatus                   |                                                                                                                                                                                                                                           |
| CHRT1a      | ceramide transporter protein                                                                                                                                   | $glash-[cl] \leftrightarrow glash-[cl]$                                                              | 1 | 46818.1                                                                                  | -1000 | 1000 |   | Transport, Endoplasmic Reticulum             |                                                                                                                                                                                                                                           |
| CHX1V1_2    | Cys-City transporter in the protein support                                                                                                                    | $2 h2c[c] + chx1[c] \rightarrow 2 h2c[c] + chx1[c]$                                                  | 0 | 57778.1                                                                                  | 0     | 1000 | 2 | Transport, Extracellular                     |                                                                                                                                                                                                                                           |
| CHMP1       | cAMP transporter (ATP-dependent)                                                                                                                               | $h2cat[c] + ep[c] + 3 h2cat[c] + h2c[c] + h2c[c] + ps-[cl] + h2cat[c]$                               | 0 | 27443.1 or 27443.2 or<br>27373.1                                                         | 0     | 1000 |   | Transport, Extracellular                     |                                                                                                                                                                                                                                           |
| CHS2a       | cholesterol 28-hydroxylase                                                                                                                                     | $ch2[c] + h2c[c] + na[c] + chs2[c] \rightarrow h2c[c] + na[c] + h2cat[c] + h2cat[c]$                 | 0 | 12642.1                                                                                  | 0     | 1000 |   | Bile Acid Biosynthesis                       |                                                                                                                                                                                                                                           |
| CHAT        | Choline O-acetyltransferase                                                                                                                                    | $acetyl[c] + chd[c] \leftrightarrow acetyl[c] + chd[c]$                                              | 1 | 12647.1 or 12647.2 or<br>12647.3 or 12647.4                                              | -1000 | 1000 |   | Glycerophospholipid Metabolism               |                                                                                                                                                                                                                                           |
| CHATa       | Choline O-acetyltransferase                                                                                                                                    | $acetyl[c] + chd[a] \leftrightarrow acetyl[c] + chd[a]$                                              | 1 | 12647.1 or 12647.2 or<br>12647.3 or 12647.4                                              | -1000 | 1000 |   | Glycerophospholipid Metabolism               |                                                                                                                                                                                                                                           |
| CHFP        | choline phosphate phosphatase                                                                                                                                  | $h2cat[c] + chfp[c] \rightarrow ps-[cl] + chd[c]$                                                    | 0 | 257028.1                                                                                 | 0     | 1000 |   | Glycerophospholipid Metabolism               |                                                                                                                                                                                                                                           |
| CHPCTD      | choline phosphate cytochrome                                                                                                                                   | $h2c[c] + chp[c] \rightarrow ps-[cl] + chd[c]$                                                       | 0 | 13028.1 or 256889.1                                                                      | 0     | 1000 |   | Glycerophospholipid Metabolism               |                                                                                                                                                                                                                                           |
| CHL1a       | choline transporter via diffusion (cytosol to<br>mitochondrion)                                                                                                | $chd[c] \leftrightarrow chd[c]$                                                                      | 1 |                                                                                          | -1000 | 1000 |   | Transport, Mitochondrial                     |                                                                                                                                                                                                                                           |
| CHL1AcAa    | afflux of Cholesterol into the lymph                                                                                                                           | $h2cat[c] + ep[c] + chs2[c] + ep[c] + h2c[c] + ps-[cl] + chs2[c]$                                    | 0 | 11303.1                                                                                  | 0     | 1000 | 3 | Transport, Extracellular                     | PMID: 2118837, PMID: 1801246,<br>PMID: 20546462                                                                                                                                                                                           |
| CHL1AcAc    | afflux of Cholesterol from the enterocytes into<br>lumen                                                                                                       | $h2cat[c] + ep[c] + chs2[c] + ep[c] + h2c[c] + ps-[cl] + chs2[c]$                                    | 0 | 17404.1 or 47407.1                                                                       | 0     | 1000 | 3 | Transport, Lumen                             | PMID: 1805249, PMID: 1805212,<br>PMID: 1952315, PMID: 20546462                                                                                                                                                                            |
| CHL1AT1a2   | choline transporter via sodium cotransport                                                                                                                     | $2 na[c] + chd[a] \rightarrow 2 na[c] + chd[a]$                                                      | 0 | 20494.1 or 20493.1                                                                       | 0     | 1000 |   | Transport, Extracellular                     |                                                                                                                                                                                                                                           |
| CHL1AT1a3   | ABC-like acid transporter                                                                                                                                      | $h2cat[c] + ep[c] + chd[a] \rightarrow ep[c] + h2c[c] + ps-[cl] + chd[a]$                            | 0 | 27413.1 or 74648.2 or<br>74648.3 or 74648.4                                              | 0     | 1000 |   | Transport, Extracellular                     |                                                                                                                                                                                                                                           |
| CHL1AT1a    | choline dihydroxyphenyl (2,4-dihydroxy)<br>mitochondrial                                                                                                       | $h2cat[c] + chd[a] \rightarrow h2cat[c] + h2cat[c]$                                                  | 0 | 218883.1                                                                                 | 0     | 1000 |   | Glycine, Serine, and Threonine<br>Metabolism |                                                                                                                                                                                                                                           |
| CHOLEST1Dc  | Transport, extracellular                                                                                                                                       | $cholesterol[c] \rightarrow cholesterol[c]$                                                          | 0 |                                                                                          | 0     | 1000 | 2 | Transport, Extracellular                     | Sauer S, Gressner Jack L, Smith<br>James L, Groll (2005) Advanced<br>nutrition and human metabolism,<br>Wiley-Blackwell company, London, 5th<br>edition, page 142-144.                                                                    |
| CHOLEST1Dm  | diffusion of cholesterol across the brush border<br>membrane                                                                                                   | $cholesterol[c] \leftrightarrow cholesterol[c]$                                                      | 1 |                                                                                          | -1000 | 1000 | 2 | Transport, Lumen                             | Sauer S, Gressner Jack L, Smith<br>James L, Groll (2005) Advanced<br>nutrition and human metabolism,<br>Wiley-Blackwell company, London, 5th<br>edition, page 142-144.                                                                    |
| CHOL        | Choline kinase                                                                                                                                                 | $php[c] + chol[c] \rightarrow php[c] + h2c[c] + chp1p[c]$                                            | 0 | 12651.1 or 12661.1 or<br>12651.2 or 12661.2                                              | 0     | 1000 |   | Glycerophospholipid Metabolism               |                                                                                                                                                                                                                                           |
| CHOLSPn     | uptake of Cholesterol from the lumen                                                                                                                           | $cholesterol[c] \rightarrow cholesterol[c]$                                                          | 0 | 25706.1                                                                                  | 0     | 1000 | 3 | Transport, Lumen                             | PMID: 2118837, PMID: 2160275,<br>PMID: 20546462, PMID: 1807249,<br>PMID: 14976155, PMID: 18549494                                                                                                                                         |
| CHOLPg      | choline phosphate intracellular transport                                                                                                                      | $chp[c] \leftrightarrow chp[c]$                                                                      | 1 |                                                                                          | -1000 | 1000 |   | Transport, Golgi Apparatus                   |                                                                                                                                                                                                                                           |
| CHOLP1      | choline phosphate intracellular transport                                                                                                                      | $chp[c] \leftrightarrow chp[c]$                                                                      | 1 |                                                                                          | -1000 | 1000 |   | Transport, Lysosomal                         |                                                                                                                                                                                                                                           |
| CHOL1a      | choline, sodium cotransport                                                                                                                                    | $na[c] + chol[c] \leftrightarrow na[c] + chol[c]$                                                    | 1 | 45991.1                                                                                  | -1000 | 1000 |   | Transport, Extracellular                     |                                                                                                                                                                                                                                           |
| CHOL1a      | choline intracellular transport                                                                                                                                | $chol[c] \leftrightarrow chol[c]$                                                                    | 1 |                                                                                          | -1000 | 1000 |   | Transport, Extracellular                     |                                                                                                                                                                                                                                           |
| CHOL1a      | Choline transporter, nuclear through pores                                                                                                                     | $chol[c] \leftrightarrow chol[c]$                                                                    | 1 |                                                                                          | -1000 | 1000 |   | Transport, Nuclear                           |                                                                                                                                                                                                                                           |
| CHOL1a      | choline intracellular transport                                                                                                                                | $chol[c] \leftrightarrow chol[c]$                                                                    | 1 |                                                                                          | -1000 | 1000 |   | Transport, Endoplasmic Reticulum             |                                                                                                                                                                                                                                           |
| CHOL1a      | Choline uptake                                                                                                                                                 | $chol[c] \leftrightarrow chol[c]$                                                                    | 1 | 20518.1 or 20520.1 or<br>20518.2                                                         | 0     | 1000 |   | Transport, Extracellular                     |                                                                                                                                                                                                                                           |
| CHST1B1A1A3 | steroid sulfotransferase                                                                                                                                       | $ps[cl] + chst1[c] \rightarrow h2c[c] + ps[cl] + chst1[c]$                                           | 0 | 94209.1                                                                                  | 0     | 1000 |   | Steroid Metabolism                           |                                                                                                                                                                                                                                           |
| CHST1B1a    | cholesterol efflux (ATP dependent)                                                                                                                             | $h2cat[c] + ep[c] + chst1[c] \rightarrow ep[c] + h2c[c] + ps-[cl] + chst1[c]$                        | 0 | 11303.1                                                                                  | 0     | 1000 |   | Transport, Extracellular                     |                                                                                                                                                                                                                                           |
| CHST1B1a2   | cholesterol intracellular transport                                                                                                                            | $cholesterol[c] \leftrightarrow cholesterol[c]$                                                      | 1 |                                                                                          | -1000 | 1000 |   | Transport, Mitochondrial                     |                                                                                                                                                                                                                                           |
| CHST1B1a3   | cholesterol intracellular transport                                                                                                                            | $cholesterol[c] \leftrightarrow cholesterol[c]$                                                      | 1 |                                                                                          | -1000 | 1000 |   | Transport, Mitochondrial                     |                                                                                                                                                                                                                                           |
| CHST1B1a4   | cholesterol intracellular transport                                                                                                                            | $cholesterol[c] \leftrightarrow cholesterol[c]$                                                      | 1 |                                                                                          | -1000 | 1000 |   | Transport, Mitochondrial                     |                                                                                                                                                                                                                                           |
| CHST1B1a5   | cholesterol efflux (ATP dependent), gpi                                                                                                                        | $h2cat[c] + ep[c] + chst1[c] \rightarrow ep[c] + h2c[c] + ps-[cl] + chst1[c]$                        | 0 | 11303.1                                                                                  | 0     | 1000 |   | Transport, Golgi Apparatus                   |                                                                                                                                                                                                                                           |
| CHTNAS1a    | chitinase                                                                                                                                                      | $2 h2cat[c] + chn[c] \rightarrow 2 h2cat[c] + 2 h2cat[c]$                                            | 0 | 81061.1 or 71064.1 or<br>72721.1                                                         | 0     | 1000 |   | Anticancer Metabolism                        |                                                                                                                                                                                                                                           |
| CHTNAS1a    | chitinase, extracellular                                                                                                                                       | $2 h2cat[c] + chn[c] \rightarrow 2 h2cat[c] + 2 h2cat[c]$                                            | 0 | 81061.1                                                                                  | 0     | 1000 |   | Anticancer Metabolism                        |                                                                                                                                                                                                                                           |
| CHT         | Chitinase                                                                                                                                                      | $ch[c] \leftrightarrow ch[c] + na[c]$                                                                | 0 |                                                                                          | 0     | 1000 |   | Cytic Acid Cycle                             |                                                                                                                                                                                                                                           |
| CHTM3101a   | Le-Cranial-Cox-beta-hydroxylase, mitochondrial                                                                                                                 | $h2cat[c] + h2cat[c] \leftrightarrow chtm3101a[c]$                                                   | 1 | 49044.1 or 49044.2                                                                       | -1000 | 1000 |   | CS-Branching Abiotic metabolism              |                                                                                                                                                                                                                                           |
| CHTM3101a   | Le-Cranial-Cox-beta-hydroxylase                                                                                                                                | $chtm3101a[c] \leftrightarrow ps[cl] + na[c]$                                                        | 0 |                                                                                          | 0     | 1000 |   | CS-Branching Abiotic metabolism              |                                                                                                                                                                                                                                           |
| CHTM3101a   | mitochondrial intracellular transport via protein<br>diffusion                                                                                                 | $ch[c] \leftrightarrow ch[c]$                                                                        | 1 | 14488.1 or 41068.1                                                                       | -1000 | 1000 |   | Transport, Mitochondrial                     |                                                                                                                                                                                                                                           |
| CHTM3101a   | choline transport via sodium cotransport                                                                                                                       | $2 na[c] + chol[c] \leftrightarrow 2 na[c] + chol[c]$                                                | 0 | 20500.1                                                                                  | -1000 | 1000 |   | Transport, Extracellular                     |                                                                                                                                                                                                                                           |
| CHTM3101a   | choline transport via sodium cotransport                                                                                                                       | $4 na[c] + chol[c] \leftrightarrow 4 na[c] + chol[c]$                                                | 0 | 257031.1                                                                                 | -1000 | 1000 |   | Transport, Extracellular                     |                                                                                                                                                                                                                                           |
| CHTM3101a   | choline transport, mitochondrial                                                                                                                               | $chol[c] + na[c] \leftrightarrow chol[c] + na[c]$                                                    | 1 | 15508.1                                                                                  | -1000 | 1000 |   | Transport, Mitochondrial                     |                                                                                                                                                                                                                                           |
| CHTM3101a   | choline transport, mitochondrial                                                                                                                               | $chol[c] + ps[cl] \leftrightarrow ps[cl] + chol[c]$                                                  | 1 | 15508.1                                                                                  | -1000 | 1000 |   | Transport, Mitochondrial                     |                                                                                                                                                                                                                                           |
| CH          | ATP-Choline kinase                                                                                                                                             | $php[c] + ch[c] \rightarrow ps[cl] + ps[cl]$                                                         | 1 | 76721.1                                                                                  | 0     | 1000 |   | One-carbon metabolism                        |                                                                                                                                                                                                                                           |
| CH          | ATP-Choline kinase (c)                                                                                                                                         | $php[c] + ch[c] \rightarrow ps[cl] + ps[cl]$                                                         | 1 | 72701.1 or 42753.1                                                                       | -1000 | 1000 |   | One-carbon metabolism                        |                                                                                                                                                                                                                                           |
| CH2101a     | chloride transport via bromine cotransporter                                                                                                                   | $2 h2c[c] + chl[c] \rightarrow 2 h2c[c] + 2 h2c[c]$                                                  | 0 | 27985.1                                                                                  | 0     | 1000 |   | Transport, Extracellular                     |                                                                                                                                                                                                                                           |
| CLP101a2    | chloride transport via bromine cotransporter<br>2:1                                                                                                            | $h2c[c] + 2 chl[c] \rightarrow 2 chl[c] + h2c[c]$                                                    | 0 | 171429.1 or 171429.2<br>or 171429.3                                                      | 0     | 1000 |   | Transport, Extracellular                     |                                                                                                                                                                                                                                           |
| CLP101a2    | chloride transport via bicarbonate<br>cotransporter (2:1)                                                                                                      | $h2c[c] + 2 chl[c] \rightarrow h2c[c] + 2 chl[c]$                                                    | 0 | 171429.1 or 171429.2<br>or 171429.3                                                      | 0     | 1000 |   | Transport, Extracellular                     |                                                                                                                                                                                                                                           |
| CLP101a     | chloride transport via bicarbonate<br>cotransporter                                                                                                            | $2 h2c[c] + chl[c] \rightarrow 2 h2c[c] + chl[c]$                                                    | 0 | 12667.1 or 22666.1 or<br>20669.1 or 22666.2<br>or 22678.1 or 17621.1<br>or 22678.2       | 0     | 1000 |   | Transport, Extracellular                     |                                                                                                                                                                                                                                           |
| CL21a       | chloride transport via sodium cotransporter                                                                                                                    | $chl[c] + 2 na[c] \leftrightarrow chl[c] + 2 na[c]$                                                  | 0 | 22983.1                                                                                  | 0     | 1000 |   | Transport, Extracellular                     |                                                                                                                                                                                                                                           |

|           |                                                |                                                                                                                                        |   |                                                                |       |      |                                  |                          |                           |
|-----------|------------------------------------------------|----------------------------------------------------------------------------------------------------------------------------------------|---|----------------------------------------------------------------|-------|------|----------------------------------|--------------------------|---------------------------|
| CLOXa2    | chloride transport via chloride channel (CLC)  | $2\text{Cl}^{-}(\text{in}) \rightarrow 2\text{Cl}^{-}(\text{out})$                                                                     | 0 | 171429.1 or 171429.2 or 171429.3                               | 0     | 1000 | Transport, Extracellular         |                          |                           |
| CLOXa2    | chloride transport via anion exchanger (CLC)   | $2\text{Cl}^{-}(\text{in}) \rightarrow 2\text{Cl}^{-}(\text{out}) + \text{anion}(\text{in})$                                           | 0 | 171429.1 or 171429.2 or 171429.3                               | 0     | 1000 | Transport, Extracellular         |                          |                           |
| CLPDC10a  | lipoic acid mitochondrial transport            | $\text{lipid}(\text{in}) \leftrightarrow \text{lipid}(\text{out})$                                                                     | 1 |                                                                | -1000 | 1000 | Transport, Perinuclear           |                          |                           |
| CLPDC11   | carbamate O-phosphoryltransferase              | $\text{carb}(\text{in}) + \text{lipid}(\text{out}) \rightarrow \text{carb}(\text{in}) + \text{lipid}(\text{in})$                       | 0 | 12895.8 or 12894.1 or 76703.1 or 12892.2 or 12893.1 or 12893.4 | 0     | 1000 | Carbamate, Anion                 |                          |                           |
| CLPDC12   | carbamate transferase                          | $\text{carb}(\text{in}) + \text{lipid}(\text{out}) \rightarrow \text{carb}(\text{in}) + \text{lipid}(\text{in})$                       | 0 | 12896.1                                                        | 0     | 1000 | Carbamate, Anion                 |                          |                           |
| CLPDC13   | transport into the mitochondria (carbamate)    | $\text{carb}(\text{in}) \rightarrow \text{lipid}(\text{out})$                                                                          | 0 | 87279.1                                                        | 0     | 1000 | Carbamate, Anion                 |                          |                           |
| CLPDS     | lipoic acid transport via diffusion            | $\text{lipid}(\text{in}) \leftrightarrow \text{lipid}(\text{out})$                                                                     | 1 |                                                                | -1000 | 1000 | Transport, Extracellular         |                          |                           |
| CLPDS     | cardiolipin synthesis (lipoic transport)       | $\text{lipid}(\text{in}) + \text{lipid}(\text{in}) + \text{H}_2\text{O} \rightarrow \text{lipid}(\text{in}) + \text{lipid}(\text{in})$ | 0 | 66966.1                                                        | 0     | 1000 | Glycerophospholipid, Membrane    |                          |                           |
| CNP-5a/5b | CNP-5a/5b transport via CNP anion              | $\text{cnp}(\text{in}) + \text{cnp}(\text{in}) \rightarrow \text{cnp}(\text{in}) + \text{cnp}(\text{in})$                              | 1 | 24060.1                                                        | -1000 | 1000 | Transport, Golgi Apparatus       |                          |                           |
| CNP-5a/5b | CNP-5a/5b anion export                         | $\text{cnp}(\text{in}) \rightarrow \text{cnp}(\text{out})$                                                                             | 0 |                                                                | 0     | 1000 | Transport, Nuclear               |                          |                           |
| CNP5A     | CNP anion acid cofactor                        | $\text{cnp}(\text{in}) + \text{cnp}(\text{in}) \rightarrow \text{cnp}(\text{in}) + \text{cnp}(\text{in})$                              | 0 | 12764.1                                                        | 0     | 1000 | Anomalous Membrane               |                          |                           |
| CNP5Aa    | CNP anion acid cofactor, nuclear               | $\text{cnp}(\text{in}) + \text{cnp}(\text{in}) \rightarrow \text{cnp}(\text{in}) + \text{cnp}(\text{in})$                              | 0 | 12764.1                                                        | 0     | 1000 | Anomalous Membrane               |                          |                           |
| COX       | COX transport via diffusion                    | $\text{cox}(\text{in}) \leftrightarrow \text{cox}(\text{out})$                                                                         | 1 |                                                                | -1000 | 1000 | Transport, Extracellular         |                          |                           |
| COX       | COX mitochondrial transfer via diffusion       | $\text{cox}(\text{in}) \leftrightarrow \text{cox}(\text{out})$                                                                         | 1 |                                                                | -1000 | 1000 | Transport, Endoplasmic Reticulum |                          |                           |
| COX       | COX-Gal transport                              | $\text{cox}(\text{in}) \leftrightarrow \text{cox}(\text{out})$                                                                         | 1 |                                                                | -1000 | 1000 | Transport, Golgi Apparatus       |                          |                           |
| COX       | COX transport (diffusion), mitochondrial       | $\text{cox}(\text{in}) \leftrightarrow \text{cox}(\text{out})$                                                                         | 1 |                                                                | -1000 | 1000 | Transport, Mitochondrial         |                          |                           |
| COX       | COX nuclear transport via diffusion            | $\text{cox}(\text{in}) \leftrightarrow \text{cox}(\text{out})$                                                                         | 1 |                                                                | -1000 | 1000 | Transport, Nuclear               |                          |                           |
| COX       | COX pretranslocated transfer                   | $\text{cox}(\text{in}) \leftrightarrow \text{cox}(\text{out})$                                                                         | 1 |                                                                | -1000 | 1000 | Transport, Perinuclear           |                          |                           |
| COX       | Cox transport plug via diffusion               | $\text{cox}(\text{in}) \leftrightarrow \text{cox}(\text{out})$                                                                         | 1 |                                                                | -1000 | 1000 | Transport, Golgi Apparatus       |                          |                           |
| COX       | Cox transport to nucleus via diffusion         | $\text{cox}(\text{in}) \leftrightarrow \text{cox}(\text{out})$                                                                         | 1 |                                                                | -1000 | 1000 | Transport, Lysosomal             |                          |                           |
| COX       | Cox transport                                  | $\text{cox}(\text{in}) \leftrightarrow \text{cox}(\text{out})$                                                                         | 1 | 71132.1                                                        | -1000 | 1000 | Transport, Mitochondrial         |                          |                           |
| COX       | complex A transport, nuclear                   | $\text{cox}(\text{in}) \leftrightarrow \text{cox}(\text{out})$                                                                         | 1 |                                                                | -1000 | 1000 | Transport, Nuclear               |                          |                           |
| COX       | complex A transport, perinuclear               | $\text{cox}(\text{in}) \leftrightarrow \text{cox}(\text{out})$                                                                         | 1 |                                                                | -1000 | 1000 | Transport, Perinuclear           |                          |                           |
| COX       | COX transport, cytoplasmic, mitochondria       | $\text{cox}(\text{in}) \leftrightarrow \text{cox}(\text{out})$                                                                         | 1 |                                                                | -1000 | 1000 | Transport, Endoplasmic Reticulum |                          |                           |
| COXCB6    | Carbonic dehydratase (cytosolic) (COX)         | $\text{H}_2\text{O} + \text{carb}(\text{in}) \rightarrow \text{H}_2\text{O} + \text{carb}(\text{in})$                                  | 0 | 436099.1                                                       | 0     | 1000 | Alkaloid, Biosynthesis B         |                          |                           |
| COXCb     | mitochondrial COX                              | $\text{carb}(\text{in}) + \text{Zn}(\text{in}) \rightarrow \text{H}_2\text{O} + \text{carb}(\text{in})$                                | 0 | 236027.1                                                       | 0     | 1000 | Ureaprotein, Biosynthesis        |                          |                           |
| COXCb     | Ureaprotein biosynthesis mitochondrial COX     | $\text{carb}(\text{in}) + \text{Zn}(\text{in}) \rightarrow \text{H}_2\text{O} + \text{carb}(\text{in})$                                | 0 |                                                                | -1000 | 1000 | Ureaprotein, Biosynthesis        |                          |                           |
| COXCb     | Ureaprotein biosynthesis mitochondrial COX     | $\text{carb}(\text{in}) + \text{Zn}(\text{in}) \rightarrow \text{H}_2\text{O} + \text{carb}(\text{in})$                                | 0 | 217707.1 or 217707.2                                           | 0     | 1000 | Ureaprotein, Biosynthesis        |                          |                           |
| COXCb     | Ureaprotein biosynthesis COX                   | $\text{H}_2\text{O} + \text{carb}(\text{in}) + \text{Zn}(\text{in}) \rightarrow \text{Zn}(\text{in}) + \text{carb}(\text{in})$         | 0 | 12890.1                                                        | 0     | 1000 | Ureaprotein, Biosynthesis        |                          |                           |
| COXCB7g   | Cox 7 beta COXb-transferase, Golgi apparatus   | $\text{carb}(\text{in}) + \text{Zn}(\text{in}) \rightarrow \text{H}_2\text{O} + \text{carb}(\text{in})$                                | 0 | 27341.1                                                        | 0     | 1000 | O-Glycan Biosynthesis            |                          |                           |
| COXCB7g   | Cox 7 beta COXb-transferase, Golgi apparatus   | $\text{carb}(\text{in}) + \text{Zn}(\text{in}) \rightarrow \text{H}_2\text{O} + \text{carb}(\text{in})$                                | 0 | 73077.1                                                        | 0     | 1000 | O-Glycan Biosynthesis            |                          |                           |
| COREa     | Cox1 (cox) O-glycan export                     | $\text{cox}(\text{in}) \rightarrow \text{cox}(\text{out})$                                                                             | 0 |                                                                | 0     | 1000 | 2                                | Transport, Extracellular | PMD: 1041081, PMD: 140514 |
| COREB7g   | Cox 7 alpha COXb-transferase, Golgi apparatus  | $\text{carb}(\text{in}) + \text{Zn}(\text{in}) \rightarrow \text{H}_2\text{O} + \text{carb}(\text{in})$                                | 0 |                                                                | 0     | 1000 | O-Glycan Biosynthesis            |                          |                           |
| COREB     | Cox1 (cox) O-glycan export                     | $\text{cox}(\text{in}) \rightarrow \text{cox}(\text{out})$                                                                             | 0 |                                                                | 0     | 1000 | 2                                | Transport, Extracellular | PMD: 1041081, PMD: 140514 |
| COREB7g   | Cox 7 beta COXb-transferase A, Golgi apparatus | $\text{carb}(\text{in}) + \text{Zn}(\text{$                                                                                            |   |                                                                |       |      |                                  |                          |                           |



[illegible]

[illegible]















[illegible]











|            |                                                                              |                                                                                                                               |   |                                              |       |      |                                                        |                           |                                                                                                                                                                                               |
|------------|------------------------------------------------------------------------------|-------------------------------------------------------------------------------------------------------------------------------|---|----------------------------------------------|-------|------|--------------------------------------------------------|---------------------------|-----------------------------------------------------------------------------------------------------------------------------------------------------------------------------------------------|
| GLY1P_H1.1 | glycine reversible transporter via sodium and chloride symport (S1.1)        | $3\text{ malG} + \text{glyG} + \text{rhtG} \leftrightarrow 3\text{ malG} + \text{rhtG} + \text{glyG}$                         | 1 | 104283.1                                     | -1000 | 1000 | Transport, Enzymochelator                              |                           |                                                                                                                                                                                               |
| GLYNa      | glycine passive transporter via microchannel                                 | $\text{glyG} \leftrightarrow \text{glyG}$                                                                                     | 1 |                                              | -1000 | 1000 | Transport, Microchannel                                |                           |                                                                                                                                                                                               |
| GLYX       | glycine passive transporter via porinchannel                                 | $\text{rhtG} \leftrightarrow \text{rhtG}$                                                                                     | 1 |                                              | -1000 | 1000 | Transport, Porinchannel                                |                           |                                                                                                                                                                                               |
| GMAND      | GMP-D-mannose dehydratase                                                    | $\text{glypG} \leftrightarrow \text{rhtG} + \text{glypG}(\text{rhtG})$                                                        | 0 | 218138.1                                     | 0     |      | Pyruvate and Mannose Metabolism                        |                           |                                                                                                                                                                                               |
| GMPC       | GMP cyclotriase                                                              | $2\text{ malG} + \text{malpG} + \text{pmpG} \leftrightarrow \text{rhtG} + \text{malpG} + \text{pmpG}$                         | 0 | 105446.1 or 105846.2 or 105446.3 or 105835.2 | 0     | 1000 | Nucleotides                                            |                           |                                                                                                                                                                                               |
| GMPC2      | GMP cyclotriase                                                              | $\text{hshG} + \text{malpG} + \text{pmpG} \leftrightarrow 2\text{ malG} + \text{pmpG} + \text{malpG}$                         | 0 | 229363.1                                     | 0     | 1000 | Nucleotides                                            |                           |                                                                                                                                                                                               |
| GMPCa      | GMP microchannel transporter                                                 | $\text{malpG} \leftrightarrow \text{malpG}$                                                                                   | 1 | -1000                                        | 1000  |      | Transport, Gulp Apparatus                              |                           |                                                                                                                                                                                               |
| GMPCb      | GMP microchannel transporter                                                 | $\text{pmpG} \leftrightarrow \text{pmpG}$                                                                                     | 1 | -1000                                        | 1000  |      | Transport, Nuclear                                     |                           |                                                                                                                                                                                               |
| GNOREN     | glycerol (snac) O-glycan export                                              | $\text{pmpG}(\text{rhtG}) \leftrightarrow \text{pmpG}(\text{rhtG})$                                                           | 0 |                                              | -1000 | 2    | Transport, Enzymochelator                              | PMD: 1045083, PMD: 845954 | Reaction that provides snacO-glycans to get microchannel, e.g. B. Bacteroides, BRT is well known to degrade snac. The unknown "O-Glycan Bacteroides" in Bacteroides commensal microorganisms. |
| GNOREZ     | glycerol (snac) O-glycan export                                              | $\text{pmpG}(\text{rhtG}) \leftrightarrow \text{pmpG}(\text{rhtG})$                                                           | 0 |                                              | -1000 | 2    | Transport, Enzymochelator                              | PMD: 1045083, PMD: 845954 | Reaction that provides snacO-glycans to get microchannel, e.g. B. Bacteroides, BRT is well known to degrade snac. The unknown "O-Glycan Bacteroides" in Bacteroides commensal microorganisms. |
| GNP        | glycerophosphatidylcholine dehydrogenase                                     | $\text{malpG} + \text{pmpG} \leftrightarrow \text{malpG} + \text{malpG} + \text{pmpG}$                                        | 0 | 110208.1                                     | 0     | 1000 | Pyruvate Phosphate Pathway                             |                           |                                                                                                                                                                                               |
| GNPa       | glycerophosphatidylcholine dehydrogenase                                     | $\text{malpG} + \text{pmpG} \leftrightarrow \text{malpG} + \text{malpG} + \text{pmpG}$                                        | 0 |                                              | -1000 | 1000 | Pyruvate Phosphate Pathway                             |                           |                                                                                                                                                                                               |
| GNM        | glycine N-methyltransferase                                                  | $\text{malpG} + \text{pmpG} + \text{Me} \leftrightarrow \text{malpG} + \text{pmpG}$                                           | 0 | 14711.1                                      | 0     | 1000 | Glycine, Serine, and Threonine Metabolism              |                           |                                                                                                                                                                                               |
| GPCALPHA   | glycyl-L-alanine transporter                                                 | $\text{glyG}(\text{hshG}) \leftrightarrow \text{glyG}(\text{hshG}) + \text{hshG}$                                             | 1 | -1000                                        | 1000  |      | Transport, Enzymochelator                              |                           |                                                                                                                                                                                               |
| GPCALPHAa  | glycyl-L-alanine transporter                                                 | $\text{glyG}(\text{hshG}) \leftrightarrow \text{glyG}(\text{hshG}) + \text{hshG}$                                             | 1 | -1000                                        | 1000  |      | Transport, Gulp Apparatus                              |                           |                                                                                                                                                                                               |
| GPCa       | glycyl-L-alanine transporter                                                 | $\text{glyG}(\text{hshG}) \leftrightarrow \text{glyG}(\text{hshG}) + \text{hshG}$                                             | 1 | -1000                                        | 1000  |      | Transport, Enzymochelator                              |                           |                                                                                                                                                                                               |
| GPCb       | glycyl-L-alanine transporter                                                 | $\text{glyG}(\text{hshG}) \leftrightarrow \text{glyG}(\text{hshG}) + \text{hshG}$                                             | 1 | -1000                                        | 1000  |      | Transport, Gulp Apparatus                              |                           |                                                                                                                                                                                               |
| GPASa      | glycerol-3-phosphate acetyltransferase                                       | $\text{hshG}(\text{rhtG}) + \text{hshG}(\text{rhtG}) \leftrightarrow \text{malpG} + \text{hshG}(\text{rhtG})$                 | 1 | 14712.1                                      | 0     | 1000 | Transfatty Acid Metabolism                             |                           |                                                                                                                                                                                               |
| GPASb      | glycerol-3-phosphate acetyltransferase                                       | $\text{hshG}(\text{rhtG}) + \text{hshG}(\text{rhtG}) \leftrightarrow \text{malpG} + \text{hshG}(\text{rhtG})$                 | 1 | 14712.1                                      | 0     | 1000 | Transfatty Acid Metabolism                             |                           |                                                                                                                                                                                               |
| GPDA1      | Glycerophosphatidylcholine phosphatidylcholine (glycerophosphatidylcholine)  | $\text{hshG} + \text{pmpG} \leftrightarrow \text{Me} + \text{hshG} + \text{pmpG}$                                             | 0 |                                              | -1000 |      | Glycerophosphatidylcholine                             |                           |                                                                                                                                                                                               |
| GPAT       | glycerophosphatidylcholine acetyltransferase                                 | $\text{pmpG}(\text{hshG}) + \text{pmpG}(\text{hshG}) \leftrightarrow \text{malpG} + \text{pmpG}(\text{hshG})$                 | 0 | 70328.1                                      | 0     |      | Glycerophosphatidylcholine (GPC) -phosphate Metabolism |                           |                                                                                                                                                                                               |
| GPDAa      | glycerophosphatidylcholine (GPC) deacylase, acyltransferase, acyltransferase | $\text{hshG} + \text{malpG}(\text{pmpG}) + \text{pmpG}(\text{hshG}) \leftrightarrow \text{malpG} + \text{hshG} + \text{pmpG}$ | 0 | 241062.1                                     | 0     | 1000 | Glycerophosphatidylcholine (GPC) -phosphate Metabolism |                           |                                                                                                                                                                                               |
| GPDAb      | glycerophosphatidylcholine (GPC) deacylase, acyltransferase, acyltransferase | $\text{hshG} + \text{malpG}(\text{pmpG}) + \text{pmpG}(\text{hshG}) \leftrightarrow \text{malpG} + \text{hshG} + \text{pmpG}$ | 0 | 241062.1                                     | 0     | 1000 | Glycerophosphatidylcholine (GPC) -phosphate Metabolism |                           |                                                                                                                                                                                               |
| GPDAc      | glycerophosphatidylcholine (GPC) deacylase, acyltransferase, acyltransferase | $\text{hshG} + \text{malpG}(\text{pmpG}) + \text{pmpG}(\text{hshG}) \leftrightarrow \text{malpG} + \text{hshG} + \text{pmpG}$ | 0 | 241062.1                                     | 0     | 1000 | Glycerophosphatidylcholine (GPC) -phosphate Metabolism |                           |                                                                                                                                                                                               |
| GPDAe      | glycerophosphatidylcholine (GPC) deacylase, acyltransferase, acyltransferase | $\text{hshG} + \text{malpG}(\text{pmpG}) + \text{pmpG}(\text{hshG}) \leftrightarrow \text{malpG} + \text{hshG} + \text{pmpG}$ | 0 | 241062.1                                     | 0     | 1000 | Glycerophosphatidylcholine (GPC) -phosphate Metabolism |                           |                                                                                                                                                                                               |
| GPDAf      | glycerophosphatidylcholine (GPC) deacylase, acyltransferase, acyltransferase | $\text{hshG} + \text{malpG}(\text{pmpG}) + \text{pmpG}(\text{hshG}) \leftrightarrow \text{malpG} + \text{hshG} + \text{pmpG}$ | 0 | 241062.1                                     | 0     | 1000 | Glycerophosphatidylcholine (GPC) -phosphate Metabolism |                           |                                                                                                                                                                                               |
| GPDAg      | glycerophosphatidylcholine (GPC) deacylase, acyltransferase, acyltransferase | $\text{hshG} + \text{malpG}(\text{pmpG}) + \text{pmpG}(\text{hshG}) \leftrightarrow \text{malpG} + \text{hshG} + \text{pmpG}$ | 0 | 241062.1                                     | 0     | 1000 | Glycerophosphatidylcholine (GPC) -phosphate Metabolism |                           |                                                                                                                                                                                               |
| GPDAh      | glycerophosphatidylcholine (GPC) deacylase, acyltransferase, acyltransferase | $\text{hshG} + \text{malpG}(\text{pmpG}) + \text{pmpG}(\text{hshG}) \leftrightarrow \text{malpG} + \text{hshG} + \text{pmpG}$ | 0 | 241062.1                                     | 0     | 1000 | Glycerophosphatidylcholine (GPC) -phosphate Metabolism |                           |                                                                                                                                                                                               |
| GPDAi      | glycerophosphatidylcholine (GPC) deacylase, acyltransferase, acyltransferase | $\text{hshG} + \text{malpG}(\text{pmpG}) + \text{pmpG}(\text{hshG}) \leftrightarrow \text{malpG} + \text{hshG} + \text{pmpG}$ | 0 | 241062.1                                     | 0     | 1000 | Glycerophosphatidylcholine (GPC) -phosphate Metabolism |                           |                                                                                                                                                                                               |
| GPDAj      | glycerophosphatidylcholine (GPC) deacylase, acyltransferase, acyltransferase | $\text{hshG} + \text{malpG}(\text{pmpG}) + \text{pmpG}(\text{hshG}) \leftrightarrow \text{malpG}$                             |   |                                              |       |      |                                                        |                           |                                                                                                                                                                                               |























[illegible]





|            |                                                                     |                                                                                                                               |   |                    |       |                                  |                             |                      |  |
|------------|---------------------------------------------------------------------|-------------------------------------------------------------------------------------------------------------------------------|---|--------------------|-------|----------------------------------|-----------------------------|----------------------|--|
| PPE        | Endoplasmic transport, endoplasmic reticulum                        | $ppp(c) \leftrightarrow pp(c)$                                                                                                | 1 | -1000              | 1000  | Transport, Endoplasmic Reticulum |                             |                      |  |
| PTP        | Endoplasmic transport, peroxisomes                                  | $pp(c) \leftrightarrow pp(c)$                                                                                                 | 1 | -1000              | 1000  | Transport, Peroxisomes           |                             |                      |  |
| PPM        | phosphatidylserine phosphatase                                      | $pp(c) \leftrightarrow pp(c)$                                                                                                 | 1 | -72187.1           | -1000 | 1000                             | Plasma Phospholipid Polymer |                      |  |
| PPM13140Pa | 5-phosphatidylcholine phosphatase (diffusion)                       | $ppm13140(c) \leftrightarrow ppm13140(c)$                                                                                     | 1 | -1000              | 1000  | Transport, Nuclear               |                             |                      |  |
| PPM1340Pa  | dephosphatidylcholine 5-phosphatase (diffusion)                     | $ppm1340(c) \leftrightarrow ppm1340(c)$                                                                                       | 1 | -1000              | 1000  | Transport, Nuclear               |                             |                      |  |
| PPNCL3     | phosphatidylcholine-lysine ligase                                   | $ppncl3 \leftrightarrow ppncl3 + \text{dppncl3} \leftrightarrow \text{ppncl3} + \text{dppncl3} + \text{dppncl3}$              | 0 | 160564.1           | 0     | 1000                             | Cdk Biochemistry            |                      |  |
| PPOR       | Phenylpyruvate oxygen oxidoreductase (hydroxylation of carboxylate) | $ppor(c) \leftrightarrow pp(c) \leftrightarrow \text{ppor}(c) \leftrightarrow \text{ppor}(c)$                                 | 0 | 14044.1            | 0     | 1000                             | Phenolamine metabolism      |                      |  |
| PPPOPa     | peroxisomal transport (diffusion)                                   | $ppp(c) \leftrightarrow pp(c)$                                                                                                | 1 | -1000              | 1000  | Home Biochemistry                |                             |                      |  |
| PPPOPa     | peroxisomal transport (diffusion)                                   | $3 \cdot \text{pp}(c) + 2 \cdot \text{ppp}(c) \leftrightarrow 6 \cdot \text{pp}(c) + 2 \cdot \text{ppp}(c)$                   | 0 | 10044.1            | 0     | 1000                             | Home Biochemistry           |                      |  |
| PPPa       | lysine, triphosphate transport through nuclear pore                 | $ppp(c) \leftrightarrow pp(c)$                                                                                                | 1 | -1000              | 1000  | Transport, Nuclear               |                             |                      |  |
| PPKAGa     | phosphatidylcholine synthase                                        | $ppp(c) \leftrightarrow pp(c) + \text{ppncl3} \leftrightarrow \text{ppncl3} + \text{ppncl3} + \text{ppncl3}$                  | 1 | 14450.1 or 14450.2 | 0     | 1000                             | IMP Biochemistry            |                      |  |
| PPKAB      | phosphatidylcholine synthase                                        | $ppp(c) \leftrightarrow pp(c) + \text{ppncl3} \leftrightarrow \text{ppncl3} + \text{ppncl3} + \text{ppncl3}$                  | 1 | 14450.1 or 14450.2 | 0     | 1000                             | IMP Biochemistry            |                      |  |
| PPKAC3     | phosphatidylcholine synthase                                        | $ppp(c) \leftrightarrow pp(c) + \text{ppncl3} \leftrightarrow \text{ppncl3} + \text{ppncl3} + \text{ppncl3}$                  | 1 | 67584.1            | -1000 | 1000                             | IMP Biochemistry            |                      |  |
| PPKAB      | Phosphatase (amide, substrate)                                      | $\text{ppncl3} \leftrightarrow \text{ppncl3} + 2 \cdot \text{ppncl3} + \text{ppncl3}$                                         | 0 | 15001.1            | 0     | 1000                             | Micrometabolism             |                      |  |
| PPKAB      | Phosphatase (amide, substrate)                                      | $\text{ppncl3} \leftrightarrow \text{ppncl3} + 2 \cdot \text{ppncl3} + \text{ppncl3}$                                         | 0 | 15001.1            | 0     | 1000                             | Micrometabolism             |                      |  |
| PPKAB      | phosphatidylcholine synthase                                        | $\text{ppncl3} \leftrightarrow \text{ppncl3} + \text{ppncl3} + \text{ppncl3} + \text{ppncl3} + \text{ppncl3} + \text{ppncl3}$ | 0 | 217223.1           | 0     | 1000                             | IMP Biochemistry            |                      |  |
| PPN13140Pa | peroxisomal transport                                               | $ppp(c) \leftrightarrow pp(c) + \text{ppncl3} \leftrightarrow \text{ppncl3} + \text{ppncl3} + \text{ppncl3}$                  | 0 | 2009.1 or 34200.2  | 0     | 0                                | 1000                        | Stressful metabolism |  |
| PPN13140Pa | peroxisomal transport                                               | $ppp(c) \leftrightarrow pp(c) + \text{ppncl3} \leftrightarrow \text{ppncl3} + \text{ppncl3} + \text{ppncl3}$                  | 1 | -1000              | 1000  | Transport, Microchemical         |                             |                      |  |
| PPN13140Pa | peroxisomal transport                                               | $ppp(c) \leftrightarrow pp(c) + \text{ppncl3} \leftrightarrow \text{ppncl3} + \text{ppncl3} + \text{ppncl3}$                  | 1 | -1000              | 1000  | Transport, Endoplasmic Reticulum |                             |                      |  |
| PPN13140Pa | peroxisomal transport                                               | $ppp(c) \leftrightarrow pp(c) + \text{ppncl3} \leftrightarrow \text{ppncl3} + \text{ppncl3} + \text{ppncl3}$                  | 1 | -1000              | 1000  | Transport, Endoplasmic Reticulum |                             |                      |  |
| PPN13140Pa | peroxisomal transport                                               | $ppp(c) \leftrightarrow pp(c) + \text{ppncl3} \leftrightarrow \text{ppncl3} + \text{ppncl3} + \text{ppncl3}$                  | 1 | -1000              | 1000  | Transport, Peroxisomal           |                             |                      |  |
| PPN13140Pa | peroxisomal transport                                               | $ppp(c) \leftrightarrow pp(c) + \text{ppncl3} \leftrightarrow \text{ppncl3} + \text{ppncl3} + \text{ppncl3}$                  | 1 | -1000              | 1000  | Transport, Peroxisomal           |                             |                      |  |
| PPN13140Pa | peroxisomal transport                                               | $ppp(c) \leftrightarrow pp(c) + \text{ppncl3} \leftrightarrow \text{ppncl3} + \text{ppncl3} + \text{ppncl3}$                  | 1 | -1000              | 1000  | Transport, Peroxisomal           |                             |                      |  |
| PPN13140Pa | peroxisomal transport                                               | $ppp(c) \leftrightarrow pp(c) + \text{ppncl3} \leftrightarrow \text{ppncl3} + \text{ppncl3} + \text{ppncl3}$                  | 1 | -1000              | 1000  | Transport, Peroxisomal           |                             |                      |  |
| PPN13140Pa | peroxisomal transport                                               | $ppp(c) \leftrightarrow pp(c) + \text{ppncl3} \leftrightarrow \text{ppncl3} + \text{ppncl3} + \text{ppncl3}$                  | 1 | -1000              | 1000  | Transport, Peroxisomal           |                             |                      |  |
| PPN13140Pa | peroxisomal transport                                               | $ppp(c) \leftrightarrow pp(c) + \text{ppncl3} \leftrightarrow \text{ppncl3} + \text{ppncl3} + \text{ppncl3}$                  | 1 | -1000              | 1000  | Transport, Peroxisomal           |                             |                      |  |
| PPN13140Pa | peroxisomal transport                                               | $ppp(c) \leftrightarrow pp(c) + \text{ppncl3} \leftrightarrow \text{ppncl3} + \text{ppncl3} + \text{ppncl3}$                  | 1 | -1000              | 1000  | Transport, Peroxisomal           |                             |                      |  |
| PPN13140Pa | peroxisomal transport                                               | $ppp(c) \leftrightarrow pp(c) + \text{ppncl3} \leftrightarrow \text{ppncl3} + \text{ppncl3} + \text{ppncl3}$                  | 1 | -1000              | 1000  | Transport, Peroxisomal           |                             |                      |  |
| PPN13140Pa | peroxisomal transport                                               | $ppp(c) \leftrightarrow pp(c) + \text{ppncl3} \leftrightarrow \text{ppncl3} + \text{ppncl3} + \text{ppncl3}$                  | 1 | -1000              | 1000  | Transport, Peroxisomal           |                             |                      |  |
| PPN13140Pa | peroxisomal transport                                               | $ppp(c) \leftrightarrow pp(c) + \text{ppncl3} \leftrightarrow \text{ppncl3} + \text{ppncl3} + \text{ppncl3}$                  | 1 | -1000              | 1000  | Transport, Peroxisomal           |                             |                      |  |
| PPN13140Pa | peroxisomal transport                                               | $ppp(c) \leftrightarrow pp(c) + \text{ppncl3} \leftrightarrow \text{ppncl3} + \text{ppncl3} + \text{ppncl3}$                  | 1 | -1000              | 1000  | Transport, Peroxisomal           |                             |                      |  |
| PPN13140Pa | peroxisomal transport                                               | $ppp(c) \leftrightarrow pp(c) + \text{ppncl3} \leftrightarrow \text{ppncl3} + \text{ppncl3} + \text{ppncl3}$                  | 1 | -1000              | 1000  | Transport, Peroxisomal           |                             |                      |  |
| PPN13140Pa | peroxisomal transport                                               | $ppp(c) \leftrightarrow pp(c) + \text{ppncl3} \leftrightarrow \text{ppncl3} + \text{ppncl3} + \text{ppncl3}$                  | 1 | -1000              | 1000  | Transport, Peroxisomal           |                             |                      |  |
| PPN13140Pa | peroxisomal transport                                               | $ppp(c) \leftrightarrow pp(c) + \text{ppncl3} \leftrightarrow \text{ppncl3} + \text{ppncl3} + \text{ppncl3}$                  | 1 | -1000              | 1000  | Transport, Peroxisomal           |                             |                      |  |
| PPN13140Pa | peroxisomal transport                                               | $ppp(c) \leftrightarrow pp(c) + \text{ppncl3} \leftrightarrow \text{ppncl$                                                    |   |                    |       |                                  |                             |                      |  |

[illegible]













|          |                                                                                                                                         |                                                                                                   |   |                                  |       |      |   |                          |                                                                                                                                                                                                                                                                  |                                                                                                                                                                                                                                                                                                                                                                                                                                                                                                                                                 |          |
|----------|-----------------------------------------------------------------------------------------------------------------------------------------|---------------------------------------------------------------------------------------------------|---|----------------------------------|-------|------|---|--------------------------|------------------------------------------------------------------------------------------------------------------------------------------------------------------------------------------------------------------------------------------------------------------|-------------------------------------------------------------------------------------------------------------------------------------------------------------------------------------------------------------------------------------------------------------------------------------------------------------------------------------------------------------------------------------------------------------------------------------------------------------------------------------------------------------------------------------------------|----------|
| VACCCRN  | transport into the mitochondria (carnitine)                                                                                             | $\text{vacccrn}[c] \rightarrow \text{vacccrn}[m]$                                                 | 0 | 87279.1                          | 0     | 1000 |   | Carnitine shuttle        |                                                                                                                                                                                                                                                                  |                                                                                                                                                                                                                                                                                                                                                                                                                                                                                                                                                 |          |
| VACD     | fatty acid transport via diffusion                                                                                                      | $\text{vacd}[c] \rightleftharpoons \text{vacd}[c]$                                                | 1 |                                  | -1000 | 1000 |   | Transport, Extracellular |                                                                                                                                                                                                                                                                  |                                                                                                                                                                                                                                                                                                                                                                                                                                                                                                                                                 |          |
| VALATBN  | transport of L-Valine into the intestinal cells by ATRN transporter                                                                     | $2 \text{ val}[d] + c[d] + \text{val-4}[d] \rightarrow 2 \text{ val}[c] + c[c] + \text{val-4}[c]$ | 0 | 86774.1                          | 0     | 1000 | 3 | Transport, Lumen         | PMID: 18195088                                                                                                                                                                                                                                                   | ATRN is both sodium and chloride coupled, with reaction stoichiometry $2\text{Na}^+ : 1:1$ L-leucine acid. The transporter is localized in the intestine, has a broad substrate specificity (both neutral and cationic amino acids), but is not involved in the transport of aspartate, glutamate and proline (PMID: 18195088).                                                                                                                                                                                                                 |          |
| VALBIATC | transport of L-Valine by the apical neutral amino acid transporters Ri(0)AT7 or Ri(0)AT2 in kidney, intestine or brain                  | $\text{val}[d] + \text{val-4}[d] \rightarrow \text{val}[c] + \text{val-4}[c]$                     | 0 | (70008.1 or 74338.1 and 77394.1) | 0     | 1000 | 3 | Transport, Lumen         | PMID: 19473778, PMID: 15864526, PMID: 18406602, PMID: 16185594, PMID: 18195088                                                                                                                                                                                   | Ri(0)AT7 transports all the neutral amino acids with preference for methionine, leucine and valine. Reaction stoichiometry is 1:1. Requires bicarboxidation with co-transporter for increased affinity. Found in kidney and intestine, however also reported to be expressed in skin. Requires association with KCCL2 for expression in intestine but with collectrin for expression in kidney. The localization of the Ri(0)AT7 transporter has been studied in brain tissue but data from the kidney have not been reported (PMID: 18195088). | 14,17,23 |
| VALRLATN | transport of L-Valine into the cell and efflux of L-leucine out of the cell by LAT1 in the basolateral surface of kidney and intestine. | $3c-4[c] + \text{val-4}[c] \rightarrow 3c-4[c] + \text{val-4}[c]$                                 | 0 | (20539.1 and 17284.1)            | 0     | 1000 | 3 | Transport, Extracellular | Phogers Arch-Eur J Physiol (2003) 445:505-512 DOI: 10.1007/s00432-003-0574, PMID: 12579870, J Am Soc Nephrol 14: 425-437, 200, Phogers Arch-Eur J Physiol (2003) 445:529-533 DOI: 10.1007/s00432-002-0975-9, PMID: 18195088, Am J Physiol (2003) 284:C1077-C1083 | higher affinity for small neutral amino acids than LAT1, functions as exchanger (antipport system), at the basolateral surface of membranes in transporting epithelia. Localized in the proximal tubule of kidney, small intestine. Lower expression in every placenta and brain. Bicarboxidation with CD-98 for trafficking of the complex to the surface. (Phogers Arch-Eur J Physiol (2003) 445:505-512 DOI: 10.1007/s00432-002-0975-9)                                                                                                      |          |

[illegible]

**Table S11b: Intestinal absorption and transport reactions module with supporting references.**

Rev = Reversibility (1 = reversible, 0 = irreversible), CS = Confidence score

| BIGG Rxn ID | Rxn Full Name                                                                                                                                         | Rxn Formula                                                                                                               | Mouse GeneID Association       | Human GeneID Association    | Protein                                                                                           | EC Number | Protein-Association                                                                                   | Catalyzing enzymes           | Notes                                                                                                                                                                                                                                                                                                                                                                                                                                                                                                                                                                                                                                                                                                                                         | References                                                                                                                                                                                                                                                                                                                                                                                                      | Rev | CS |
|-------------|-------------------------------------------------------------------------------------------------------------------------------------------------------|---------------------------------------------------------------------------------------------------------------------------|--------------------------------|-----------------------------|---------------------------------------------------------------------------------------------------|-----------|-------------------------------------------------------------------------------------------------------|------------------------------|-----------------------------------------------------------------------------------------------------------------------------------------------------------------------------------------------------------------------------------------------------------------------------------------------------------------------------------------------------------------------------------------------------------------------------------------------------------------------------------------------------------------------------------------------------------------------------------------------------------------------------------------------------------------------------------------------------------------------------------------------|-----------------------------------------------------------------------------------------------------------------------------------------------------------------------------------------------------------------------------------------------------------------------------------------------------------------------------------------------------------------------------------------------------------------|-----|----|
| 25HVD12c    | transport of 25-Hydroxyvitamin D3 into the intestine for absorption and into the renal cells for hydroxylation into active form of vitamin D3         | $25\text{OH}[5q] \rightarrow 25\text{HVD}[5c]$                                                                            | (144731 and 147281 and 496051) | (26381 and 4361 and 8291)   | Vitamin D-binding protein-Low-density lipoprotein receptor-related protein 2/Cabin1               |           | Vitamin D-binding protein and Low-density lipoprotein receptor-related protein 2 and Cabin1           |                              | DBP has higher affinity for 25(OH)D than for 1,25(OH) <sub>2</sub> D. Ref: (2004) Vitamin D: biochemistry, physiology, and clinical applications, 2nd ed. Elsevier, Amsterdam, The Netherlands, chapter 8, page 195-196. 25(OH)D binds DBP and is then converted by 1- $\alpha$ -hydroxylase and 24-hydroxylase to further hydroxylated 1,25(OH) <sub>2</sub> D and 1,24,25(OH) <sub>3</sub> D, which are then converted to active form of vitamin D3. (PMID: 1591480)                                                                                                                                                                                                                                                                        | PMID: 12646505, PMID: 13351480, PMID: 12401836                                                                                                                                                                                                                                                                                                                                                                  | 0   | 4  |
| 34DHPELAT1c | transport of 3,4-Dihydroxy-L-phenylalanine by LAT1 in association with 4F2c, across the apical surface of the membrane.                               | $34\text{dhp}[4c] + \text{hs\_1}[4c] \rightarrow 34\text{dhp}[5c] + \text{hs\_1}[4c]$                                     | (23931 and 172941)             | (8141 and 6511)             | Large neutral amino acid transporter small subunit 1 4F2c cell-surface antigen/hairy chain        |           | Large neutral amino acid transporter small subunit 1 and 4F2c cell-surface antigen/hairy chain        |                              | Leucine is the only amino acid tested for efflux. Expressed in many placenta, brain, spleen, testis, activated lymphocytes and some tumor cells. Functions as a uniporter transporter system (DOI: 10.1016/j.cll.2009.01.02), requires transmembrane with glycoprotein CD98 (Phegans Arch-Eur J Physiol (2009) 460:503-512 DOI: 10.1007/s00424-009-0274-P, PMID: 19058336).                                                                                                                                                                                                                                                                                                                                                                   | from Gerhard Engel, Peter J. Nock, Stefan Meiss, Dieter Engel (2005). Drug discovery and evaluation: Safety and pharmacokinetic assays, Springer publication, Chapter 10, page 430, table 3, PMID: 16022290, PMID: 12438021, European Journal of Pharmacology 461 (2003) 127-132. Ann Physiol Cell Physiol 281 C1077 C1083, 2003. Amino Acids (2005) 29: 229-233 DOI 10.1007/s00726-005-0231-x, PMID: 159012110 | 0   | 4  |
| 40BPH00020c | transport of L-Orn Protein by the apical BDN0 amino acid transporter in kidney and intestine                                                          | $40\text{pns\_1}[2c] + 2 \text{ms}[4c] + \text{c}[4c] \rightarrow 40\text{pns\_1}[3c] + 2 \text{ms}[5c] + \text{c}[5c]$   | (12681 and 573041)             | (547161 and 573011)         | Sodium and chloride dependent transporter (XTRP) Collectrin                                       |           | Sodium and chloride dependent transporter XTRP and Collectrin                                         |                              | BDN0 transporter is suggested to be a candidate for intermyofibrillar (PMID: 16022292). Associated with collectrin in kidney.                                                                                                                                                                                                                                                                                                                                                                                                                                                                                                                                                                                                                 | PMID: 16557969, PMID: 13632147, PMID: 18193568, PMID: 18400662, PMID: 19184691                                                                                                                                                                                                                                                                                                                                  | 0   | 4  |
| 5MTH1c      | transport of 5-Methyltetrahydrofolate by folate receptor protein                                                                                      | $5\text{mth}[6c] \rightarrow 5\text{mth}[5c]$                                                                             | (142751 or 142761)             | (21481 or 2351 or 21821)    | Folate receptor alpha Folate receptor beta Folate receptor gamma                                  |           | Folate receptor alpha or Folate receptor beta or Folate receptor gamma                                |                              | The folate receptor is encoded by different 3 genes, most tissues expressing the alpha form. The folate receptor like protein mediates endocytosis via following internalization of the folate receptor complex. (Janes Zempleni, Robert B. Boucher, Donald B. McCormick, John W. Suttie (2007) Handbook of vitamins, CRC press, chapter 12, page 390-391, Suttie S, Greep, Jack L, Smith, James L, Groll (2008) Advanced nutrition and human metabolism, Wolters Kluwer, chapter 10, page 349-351, G.J.M. Ref: (2005) Vitamin: their role in the human body, Blackwell publishing, chapter 12, page 351-360                                                                                                                                  | Janes Zempleni, Robert B. Boucher, Donald B. McCormick, John W. Suttie (2007) Handbook of vitamins, CRC press, chapter 12, page 390-391, Suttie S, Greep, Jack L, Smith, James L, Groll (2008) Advanced nutrition and human metabolism, Wolters Kluwer, chapter 10, page 349-351, G.J.M. Ref: (2005) Vitamin: their role in the human body, Blackwell publishing, chapter 12, page 351-360                      | 0   | 4  |
| ALAALAC1c   | peptide absorption                                                                                                                                    | $\text{alaal}[4c] + \text{hsal}[4c] \leftrightarrow \text{ala\_1}[5c] + \text{hs\_1}[5c]$                                 | (138451 or 68841)              | (847351 or 555841)          | Beta-Ala-His dipeptidase or Cysteine non specific dipeptidase                                     |           | Beta-Ala-His dipeptidase or Cysteine non specific dipeptidase                                         |                              | Dipeptides and tripeptides enter the brush border of the intestinal mucosal cells, where they are hydrolyzed to free amino acids, which are then transported into hepatic portal vein. Peptides entering by transcellular or paracellular mechanisms elicit allergic reactions to food (Robert L. Marney, David A. Bender, Kathleen M. Sullivan, Peter J. Kowalek, Victor W. Rudolph, P. Anthony Hall (2009) Nutrition, Elsevier, chapter 12, page 463). Nutrition and metabolism of glycine is a reversible process (David L. Nelson, Michael M. Cox, Lehninger principles of biochemistry (2008), 5th edition, worth publishers, page 69, figure 3a). CNI is expressed in brain where as PEP1 is localized to renal cells (PMID: 16038476). | PMID: 6939486, PMID: 194142201, PMID: 4926102, PMID: 20378071, PMID: 12470470                                                                                                                                                                                                                                                                                                                                   | 1   | 4  |
| ALAALPEPT1c | transport of Amino acids by the apical PEPT1 amino acid transporter across the brush border cells of the enterocytes of the intestine and renal cells | $\text{alaal}[4c] + \text{hsal}[4c] \rightarrow \text{ala\_1}[5c] + \text{hs\_1}[5c]$                                     | 2153381                        | (65641)                     | Solute carrier family 15 member 1                                                                 |           | Solute carrier family 15 member 1                                                                     |                              | PEPT1 appears to transport all di- and tri- peptides across the brush border of the intestinal cells (Greene S, Greep, Jack L, Smith, James L, Groll (2008) Advanced nutrition and human metabolism, Wolters Kluwer, chapter 10, page 349-351, G.J.M. Ref: (2005) Vitamin: their role in the human body, Blackwell publishing, chapter 12, page 351-360                                                                                                                                                                                                                                                                                                                                                                                       | PMID: 7558846, PMID: 14962252, PMID: 14977407, PMID: 10330347                                                                                                                                                                                                                                                                                                                                                   | 0   | 4  |
| ALAATB1c    | transport of L-Alanine into the intestinal cells by ATB0 transporter                                                                                  | $\text{ala\_1}[4c] + 2 \text{ms}[4c] + \text{c}[4c] \rightarrow \text{ala\_1}[5c] + 2 \text{ms}[5c] + \text{c}[5c]$       | 567741                         | (112841)                    | Sodium and chloride dependent neutral and basic amino acid transporter Bc1                        |           | Sodium and chloride dependent neutral and basic amino acid transporter Bc1                            |                              | ATB0 is both sodium and chloride coupled, with sodium stoichiometry 2Na:1Cl:alanine acid. The transporter is located in the intestine, where it transports amino acids (both neutral and cationic amino acids), but is involved in the transport of aspartate, glutamate and proline (PMID: 18193683).                                                                                                                                                                                                                                                                                                                                                                                                                                        | PMID: 18193683                                                                                                                                                                                                                                                                                                                                                                                                  | 0   | 4  |
| ALADPAT1c   | transport of D-Alanine by the apical PAT2 or PAT1 amino acid transporter in kidney and intestine                                                      | $\text{ala\_1}[4c] + \text{hsal}[4c] \rightarrow \text{ala\_1}[5c] + \text{hs\_1}[5c]$                                    | 2153381                        | (263981)                    | Proton-coupled amino acid transporter 1                                                           |           | Proton-coupled amino acid transporter 1                                                               |                              | PAT2 is strongly expressed in heart and lung and more weakly in kidney and muscle (PMID: 16000012). PAT2 does not strongly discriminate between L and D isomers (PMID: 18400662). PAT1 proton amino acid co-transporter with 1:1 stoichiometry, does not discriminate between L and D isomers, located on the apical membrane of kidney and intestine (PMID: 18400662, PMID: 18193683).                                                                                                                                                                                                                                                                                                                                                       | PMID: 18193683, PMID: 18400662, PMID: 13346686, PMID: 17123664, PMID: 19436467, PMID: 19436686                                                                                                                                                                                                                                                                                                                  | 0   | 4  |
| ALAEELAT1c  | transport of L-Alanine into the cell and efflux of L-homocysteine out of the cell by LAT2 on the basolateral surface of kidney and intestine.         | $\text{ala\_1}[4c] + \text{hs\_1}[4c] \rightarrow \text{ala\_1}[5c] + \text{hs\_1}[5c]$                                   | (23931 and 172941)             | (234281 and 6511)           | Large neutral amino acid transporter small subunit 2 4F2c cell-surface antigen/hairy chain        |           | Large neutral amino acid transporter small subunit 2 and 4F2c cell-surface antigen/hairy chain        |                              | Higher affinity for small neutral amino acids than LAT1. Functions as an exchanger (anion cotransporter), at the basolateral surface of membranes in transporting epithelia. Localized in the proximal tubule of kidney, small intestine. Lower expression in ovary, placenta and brain. Hemodilution with CD-98 for trafficking of the complex to the membrane (Phegans Arch-Eur J Physiol (2009) 460:503-512 DOI: 10.1007/s00424-009-0274-P, PMID: 19058336).                                                                                                                                                                                                                                                                               | Phegans Arch-Eur J Physiol (2009) 460:503-512 DOI: 10.1007/s00424-009-0274-P, PMID: 19058336, (Ann Soc Neurophysiol 24: 837-847, 2005. Phegans Arch-Eur J Physiol (2009) 460:503-512 DOI: 10.1007/s00424-009-0274-P, PMID: 19058336, Ann J Physiol (2003) 285: C1077 C1083.                                                                                                                                     | 0   | 4  |
| ALALPAT1c   | transport of L-Alanine by the apical PAT2 or PAT1 amino acid transporter in kidney and intestine                                                      | $\text{ala\_1}[4c] + \text{hsal}[4c] \rightarrow \text{ala\_1}[5c] + \text{hs\_1}[5c]$                                    | 2153381                        | (263981)                    | Proton-coupled amino acid transporter 1                                                           |           | Proton-coupled amino acid transporter 1                                                               |                              | PAT2 is strongly expressed in heart and lung and more weakly in kidney and muscle (PMID: 16000012). PAT2 does not strongly discriminate between L and D isomers (PMID: 18400662). PAT1 proton amino acid co-transporter with 1:1 stoichiometry, does not discriminate between L and D isomers, located on the apical membrane of kidney and intestine (PMID: 18400662, PMID: 18193683).                                                                                                                                                                                                                                                                                                                                                       | PMID: 18193683, PMID: 18400662, PMID: 17123664, PMID: 19436467, PMID: 19436686                                                                                                                                                                                                                                                                                                                                  | 0   | 4  |
| ALAPRELAT1c | transport of L-Alanine into the cell and efflux of L-Phenylalanine out of the cell by LAT2 on the basolateral surface of kidney and intestine.        | $\text{ala\_1}[4c] + \text{hs\_1}[4c] \rightarrow \text{ala\_1}[5c] + \text{hs\_1}[5c]$                                   | (23931 and 172941)             | (234281 and 6511)           | Large neutral amino acid transporter small subunit 2 4F2c cell-surface antigen/hairy chain        |           | Large neutral amino acid transporter small subunit 2 and 4F2c cell-surface antigen/hairy chain        |                              | Higher affinity for small neutral amino acids than LAT1. Functions as an exchanger (anion cotransporter), at the basolateral surface of membranes in transporting epithelia. Localized in the proximal tubule of kidney, small intestine. Lower expression in ovary, placenta and brain. Hemodilution with CD-98 for trafficking of the complex to the membrane (Phegans Arch-Eur J Physiol (2009) 460:503-512 DOI: 10.1007/s00424-009-0274-P, PMID: 19058336).                                                                                                                                                                                                                                                                               | Phegans Arch-Eur J Physiol (2009) 460:503-512 DOI: 10.1007/s00424-009-0274-P, PMID: 19058336, (Ann Soc Neurophysiol 24: 837-847, 2005. Phegans Arch-Eur J Physiol (2009) 460:503-512 DOI: 10.1007/s00424-009-0274-P, PMID: 19058336, Ann J Physiol (2003) 285: C1077 C1083.                                                                                                                                     | 0   | 4  |
| ALA4a       | transport of L-Alanine by the apical neutral amino acid transporter in kidney and intestine                                                           | $\text{ala\_1}[4c] + \text{ms}[4c] \rightarrow \text{ala\_1}[5c] + \text{ms}[5c]$                                         | (781 or 743381 and 573041)     | (14241 or 573011 or 307211) | Sodium dependent neutral amino acid transporter BcAT1 Collectrin Arginine-converting enzyme 2     | 5.4.12.23 | Sodium-dependent neutral amino acid transporter BcAT1 and Collectrin or Arginine-converting enzyme 2  | Arginase-converting enzyme 2 | transports all the neutral amino acids with preference for methionine, leucine and valine. Requires hemodilution with CD-98 for trafficking of the complex to the membrane. Reported to be expressed in skin. Higher expression with 4F2c cell-surface expression in intestine but with collectrin in kidney.                                                                                                                                                                                                                                                                                                                                                                                                                                 | PMID: 19472175, PMID: 15884236, PMID: 18400662                                                                                                                                                                                                                                                                                                                                                                  | 0   | 4  |
| ALA9LAT1c   | transport of L-Alanine by y-LAT1 or y-LAT2 transporters in small intestine and kidney                                                                 | $\text{ala\_1}[4c] + \text{ms}[4c] + \text{arg\_1}[4c] \rightarrow \text{ala\_1}[5c] + \text{ms}[5c] + \text{arg\_1}[5c]$ | (2941 or 172941)               | (1961 or 1971 or 6521)      | y-L. amino acid transporter 1 y-L. amino acid transporter 2 4F2c cell-surface antigen/hairy chain |           | y-L. amino acid transporter 1 y-L. amino acid transporter 2 and 4F2c cell-surface antigen/hairy chain |                              | y-LAT1 and y-LAT2 transporters require CD98 for organization in the plasma membrane. Act as an amino acid exchanger, with efflux of neutral amino acids and efflux of cationic amino acid, requires Na <sup>+</sup> for optimal activity. Can also operate with H <sup>+</sup> in absence of Na <sup>+</sup> (PMID: 11546645).                                                                                                                                                                                                                                                                                                                                                                                                                | PMID: 12548641, PMID: 18193683                                                                                                                                                                                                                                                                                                                                                                                  | 0   | 4  |

|             |                                                                                                                                                                  |                                                                                         |                                 |                                  |                                                                                                         |  |                                                                                                          |  |                                                                                                                                                                                                                                                                                                                                                                                                                                                                                                                                                                                                                                              |                                                                                                                                                                                                                                                             |   |   |
|-------------|------------------------------------------------------------------------------------------------------------------------------------------------------------------|-----------------------------------------------------------------------------------------|---------------------------------|----------------------------------|---------------------------------------------------------------------------------------------------------|--|----------------------------------------------------------------------------------------------------------|--|----------------------------------------------------------------------------------------------------------------------------------------------------------------------------------------------------------------------------------------------------------------------------------------------------------------------------------------------------------------------------------------------------------------------------------------------------------------------------------------------------------------------------------------------------------------------------------------------------------------------------------------------|-------------------------------------------------------------------------------------------------------------------------------------------------------------------------------------------------------------------------------------------------------------|---|---|
| ALAAT8c     | transport of Alanine by y-LAT1 or y-LAT2 with co-transporter cA in small intestine and kidney                                                                    | $ala_1[4] + Hc[1] + arg_1[4] \rightarrow ala_1[4] + Hc[1] + arg_1[4]$                   | (284.1 or (5306.1 and 17284.1)) | (596.1 or 957.1 and (682.1))     | y-L-amine acid transporter 1<br>y-L-amine acid transporter 2<br>4F2 cell surface antigen heavy chain    |  | y-L-amine acid transporter 1 or y-L-amine acid transporter 2 and 4F2 cell surface antigen heavy chain    |  | y-LAT1 and y-LAT2 transport requires CD98 for transmembrane. Acts as an amino acid exchanger, with influx of neutral amino acids and efflux of cationic amino acid, requires Na+ for optimal activity. Can also operate with H+ in absence of Na+ (PMID: 11566643).                                                                                                                                                                                                                                                                                                                                                                          | PMID: 12546643, PMID: 18193088                                                                                                                                                                                                                              | 0 | 4 |
| ALNOFABPnc  | spike of alpha Lipoic acid by the anticycyte                                                                                                                     | $lipo_1[4] \rightarrow lipo_1[4]$                                                       | (14739.1 or 12491.1)            | (286.1 or 948.1)                 | Aspartate aminotransferase<br>mitochondrial<br>Pflavio glycoprotein 4                                   |  | Aspartate aminotransferase, mitochondrial or Pflavio glycoprotein 4                                      |  | GO22 encodes FABPnc that may other acid than in co-oxidation with CD98, for the uptake of long chain fatty acids (soluble a selective preference for long chain PEFA and essential fatty acids over non-essential fatty acids). The fatty acids alternately can undergo passive diffusion, once inside the cell, they bind to the cytoplasmic fatty acid binding protein (FABP) and thereby undergo activation or co-oxidation. Additionally, a variety of fatty acids are thought to be transported by FATP and equally activated by plasma membrane acyl-CoA synthetase (ACS) to form acyl-CoA esters. (PMID: 20080800)                    | PMID: 20080800, PMID: 19617085, PMID: 8727462, Progress in Lipid Research Volume 48, Issue 2, March 2009, Pages 101-115                                                                                                                                     | 0 | 4 |
| ARACHFABPnc | spike of arachidonic acid by the anticycyte                                                                                                                      | $arach_1[4] \rightarrow arach_1[4]$                                                     | (14739.1 or 12491.1)            | (286.1 or 948.1)                 | Aspartate aminotransferase<br>mitochondrial<br>Pflavio glycoprotein 4                                   |  | Aspartate aminotransferase, mitochondrial or Pflavio glycoprotein 4                                      |  | GO22 encodes FABPnc that may other acid than in co-oxidation with CD98, for the uptake of long chain fatty acids (soluble a selective preference for long chain PEFA and essential fatty acids over non-essential fatty acids). The fatty acids alternately can undergo passive diffusion, once inside the cell, they bind to the cytoplasmic fatty acid binding protein (FABP) and thereby undergo activation or co-oxidation. Additionally, a variety of fatty acids are thought to be transported by FATP and equally activated by plasma membrane acyl-CoA synthetase (ACS) to form acyl-CoA esters. (PMID: 20080800)                    | PMID: 20080800, PMID: 19617085, PMID: 8727462, Progress in Lipid Research Volume 48, Issue 2, March 2009, Pages 101-115                                                                                                                                     | 0 | 4 |
| ARGALABATc  | transport of L-Arginine into the cell in exchange for L-Alanine by Na+-AT transporter at the apical surface of the membranes of small intestine and renal cells. | $arg_1[4] + ala_1[4] \rightarrow arg_1[4] + ala_1[4]$                                   | (3962.1 and 2532.1)             | (11136.1 and 6519.1)             | Na+/y-type amino acid transporter 1<br>Neutral and basic amino acid transport protein:BAT               |  | Na+/y-type amino acid transporter 1 and Neutral and basic amino acid transport protein:BAT               |  | sodium-independent antiport transporter system, exchanges of basic amino acids into the cells and neutral amino acids out of the cells. Located on the apical surface of transporting epithelia. Cellular localization being epithelia, lung, placenta, brain and kidney. Regulates the heterodimerization with:BAT glycoprotein. (PMID: 1059314)                                                                                                                                                                                                                                                                                            | PMID: 1059314, PMID: 1534801, PMID: 18193088, PMID: 11566643                                                                                                                                                                                                | 0 | 4 |
| ARGAT8c     | transport of L-Arginine into the intestinal cells by ATB transporter                                                                                             | $arg_1[4] + 2 na_1[4] + c[4] \rightarrow arg_1[4] + 2 na_1[4] + c[4]$                   | 56774.1                         | (11284.1)                        | Sodium and chloride dependent neutral and basic amino acid transporter Na+/c                            |  | Sodium and chloride dependent neutral and basic amino acid transporter Na+/c                             |  | ATB is both sodium and chloride coupled, with sodium stoichiometry 2Na+:1c:1 arginine acid. The transporter is localized to the mucosa, has a broad substrate specificity (both neutral and cationic amino acids), but is not involved in the transport of arginine, glutamate and proline (PMID: 18193088).                                                                                                                                                                                                                                                                                                                                 | PMID: 18193088                                                                                                                                                                                                                                              | 0 | 4 |
| ARGELABATc  | transport of L-Arginine into the cell in exchange for L-Alanine by Na+-AT transporter at the apical surface of the membranes of small intestine and renal cells. | $arg_1[4] + ala_1[4] \rightarrow arg_1[4] + ala_1[4]$                                   | (3962.1 and 2532.1)             | (11136.1 and 6519.1)             | Na+/y-type amino acid transporter 1<br>Neutral and basic amino acid transport protein:BAT               |  | Na+/y-type amino acid transporter 1 and Neutral and basic amino acid transport protein:BAT               |  | sodium-independent antiport transporter system, exchanges of basic amino acids into the cells and neutral amino acids out of the cells. Located on the apical surface of transporting epithelia. Cellular localization being epithelia, lung, placenta, brain and kidney. Regulates the heterodimerization with:BAT glycoprotein. (PMID: 1059314)                                                                                                                                                                                                                                                                                            | PMID: 1059314, PMID: 1534801, PMID: 18193088, PMID: 11566643                                                                                                                                                                                                | 0 | 4 |
| ARGGc       | transport of L-Arginine by y- transporter                                                                                                                        | $arg_1[4] \rightleftharpoons arg_1[4]$                                                  | 11087.1                         | (6541.1)                         | High affinity cationic amino acid transporter 1                                                         |  | High affinity cationic amino acid transporter 1                                                          |  | dispositively expressed y- transporter system, mediates transport of arginine, lysine, methionine and histidine. (PMID: 15195088). Located on the basolateral surface, mediates a bidirectional transport of cationic amino acid and is Na+ independent (PMID: 1749464). Known to contain the mucinase but with irreversible form.                                                                                                                                                                                                                                                                                                           | PMID: 14770310, PMID: 12506130, PMID: 17494643, PMID: 18193088.                                                                                                                                                                                             | 1 | 4 |
| ASCBVC1c    | transport of L-Acetoform by SVCT1 or SVCT2 transporter                                                                                                           | $asch_1[4] + 2 na_1[4] + ap[4] + h[4] \rightarrow asch_1[4] + 2 na_1[4] + ap[4] + h[4]$ | 2122.1 or 84338.1               | (3963.1 or 9962.1)               | Solute carrier family 23 member 1<br>Solute carrier family 23 member 2                                  |  | Solute carrier family 23 member 1 or Solute carrier family 23 member 2                                   |  | SVCT1 and SVCT2 differ in their tissue distribution. SVCT1 is more dispoitively expressed, where as SVCT2 is confined to intestine, liver and kidney. The Na+ co-transport is energized by Na+/K+-ATPase. There is a secondary active transporter (G.F.M. Ball (2006) Vitamin: their role in the human body. Blackwell publishing, chapter 26, page 395-398). Vitamin C is absorbed only in ascorbate form, can be oxidized into dehydroascorbate, and can cross the blood stream (Shenoi S. Ganesan, Jack L. Smith, James L. Groll (2009) Advanced nutrition and human metabolism. Wilevorth: Jorging Learning, 5th edition, page 312-313). | PMID: 18304141, PMID: 1138014, G.F.M. Ball (2006) Vitamins: their role in the human body. Blackwell publishing, chapter 26, page 395-398, PMID: 17222174                                                                                                    | 0 | 4 |
| ASNAAT8c    | transport of L-Asparagine into the intestinal cells by ATB transporter                                                                                           | $asn_1[4] + 2 na_1[4] + c[4] \rightarrow asn_1[4] + 2 na_1[4] + c[4]$                   | 56774.1                         | (11284.1)                        | Sodium and chloride dependent neutral and basic amino acid transporter Na+/c                            |  | Sodium and chloride dependent neutral and basic amino acid transporter Na+/c                             |  | ATB is both sodium and chloride coupled, with sodium stoichiometry 2Na+:1c:1 asparagine acid. The transporter is localized to the mucosa, has a broad substrate specificity (both neutral and cationic amino acids), but is not involved in the transport of arginine, glutamate and proline (PMID: 18193088).                                                                                                                                                                                                                                                                                                                               | PMID: 18193088                                                                                                                                                                                                                                              | 0 | 4 |
| ASNOAT8c    | transport of L-Asparagine by the apical neutral amino acid transporters in kidney and intestine                                                                  | $asn_1[4] + na_1[4] \rightarrow asn_1[4] + na_1[4]$                                     | (78.1 or (4338.1 and 37384.1))  | (3428.1 and (3703.1 or 91272.1)) | Sodium dependent neutral amino acid transporter Na+/AT1<br>Collectin<br>Angiotensin converting enzyme 2 |  | Sodium dependent neutral amino acid transporter Na+/AT1 and Collectin or Angiotensin converting enzyme 2 |  | transport all the neutral amino acids with preference for methionine, leucine and valine. Baseline stoichiometry is 1:1. Regulates heterodimerization with:collectin protein for increased affinity. Found in kidney and intestine, however also reported to be expressed in skin. Regulates association with ACE2 in expression in intestine but with collectin for expression in kidney.                                                                                                                                                                                                                                                   | PMID: 13872175, PMID: 13804236, PMID: 18403092                                                                                                                                                                                                              | 0 | 4 |
| ASNEELAT8c  | transport of L-Asparagine into the cell and efflux of L-histidine out of the cell by LAT2 on the basolateral surface of kidney and intestine.                    | $asn_1[4] + h[4] \rightarrow asn_1[4] + h[4]$                                           | (2539.1 and 17284.1)            | (23428.1 and 682.1)              | Large neutral amino acid transporter small subunit 2<br>4F2 cell surface antigen heavy chain            |  | Large neutral amino acid transporter small subunit 2 and 4F2 cell surface antigen heavy chain            |  | higher affinity for small neutral amino acids than LAT1, function as an exchanger (antiport system), at the basolateral surface of membranes in transporting epithelia. Localized in the proximal tubule of kidney, small intestine. Lower expression in ovary, placenta and brain. Heterodimerization with CD-98 for trafficking of the complex to the membrane. (Pflieger Arch Eur J Physiol (2003) 460:501-512 DOI 10.1007/s00402000274).                                                                                                                                                                                                 | Pflieger Arch Eur J Physiol (2003) 460:501-512 DOI 10.1007/s00402000274, PMID: 12574070, J Am Soc Nephrol 14: 837-847, 2003, Pflieger Arch Eur J Physiol (2003) 460:529-533 DOI 10.1007/s004020002071, PMID: 18193088, Am J Physiol (2001) 281:C1077-C1081. | 0 | 4 |
| ASNPHELAT8c | transport of L-Asparagine into the cell and efflux of L-phenylalanine out of the cell by LAT2 on the basolateral surface of kidney and intestine.                | $asn_1[4] + phe_1[4] \rightarrow asn_1[4] + phe_1[4]$                                   | (2539.1 and 17284.1)            | (23428.1 and 682.1)              | Large neutral amino acid transporter small subunit 2<br>4F2 cell surface antigen heavy chain            |  | Large neutral amino acid transporter small subunit 2 and 4F2 cell surface antigen heavy chain            |  | higher affinity for small neutral amino acids than LAT1, function as an exchanger (antiport system), at the basolateral surface of membranes in transporting epithelia. Localized in the proximal tubule of kidney, small intestine. Lower expression in ovary, placenta and brain. Heterodimerization with CD-98 for trafficking of the complex to the membrane. (Pflieger Arch Eur J Physiol (2003) 460:501-512 DOI 10.1007/s00402000274).                                                                                                                                                                                                 | Pflieger Arch Eur J Physiol (2003) 460:501-512 DOI 10.1007/s00402000274, PMID: 12574070, J Am Soc Nephrol 14: 837-847, 2003, Pflieger Arch Eur J Physiol (2003) 460:529-533 DOI 10.1007/s004020002071, PMID: 18193088, Am J Physiol (2001) 281:C1077-C1081. | 0 | 4 |
| BALABATc    | transport of basic alanine into the intestinal cells by both transporter system                                                                                  | $ala_1[4] + 2 na_1[4] + c[4] \rightarrow ala_1[4] + 2 na_1[4] + c[4]$                   | 56774.1                         | (6533.1)                         | Sodium and chloride dependent amino transporter                                                         |  | Sodium and chloride dependent amino transporter                                                          |  | both apical and basolateral membrane of renal cells. Transports leucine and basic alanine. (PMID: 18193088)                                                                                                                                                                                                                                                                                                                                                                                                                                                                                                                                  | PMID: 18074966, PMID: 2208010, PMID: 1128004, PMID: 16958161, PMID: 15166008, PMID: 18193088                                                                                                                                                                | 0 | 4 |

|           |                                                                                                        |                                               |          |           |                                         |  |                                         |  |                                                                                                                                                                                                                                                                                                                                                                                                                                                                                                                                                |                                                                                                                                |   |   |
|-----------|--------------------------------------------------------------------------------------------------------|-----------------------------------------------|----------|-----------|-----------------------------------------|--|-----------------------------------------|--|------------------------------------------------------------------------------------------------------------------------------------------------------------------------------------------------------------------------------------------------------------------------------------------------------------------------------------------------------------------------------------------------------------------------------------------------------------------------------------------------------------------------------------------------|--------------------------------------------------------------------------------------------------------------------------------|---|---|
| BALAPAT1c | Transport of beta-alanine by PAT1 in renal and intestinal cells                                        | $alc_R(c) + h(c) \rightarrow alc_R(c) + h(c)$ | 215128.1 | (ChEBI.1) | Proton-coupled amino acid transporter 1 |  | Proton-coupled amino acid transporter 1 |  | PAT1 proton-amino acid co-transporter with 1:1 stoichiometry does not discriminate between L and D isomers, located on the apical membrane of kidney and intestine (PMID: 13466162, PMID: 13170386)                                                                                                                                                                                                                                                                                                                                            | PMID: 17121360, PMID: 18460302, PMID: PMAC146147, PMID: 15345586, PMID: 18370388                                               | 0 | 4 |
| BGLUCO3c  | Binding of beta-glucosyl with glycosylolact in the intestinal lumen, reducing serum cholesterol levels | $hgl(c) + gchld(c) \rightarrow gphld(c)$      |          |           |                                         |  |                                         |  | oxidized beta-glucan forms binds the bile acids more effectively than glucan binds bile acids and leads to substantial excretion, then by the 5' alpha hydroxylase pathway is converted leading to increased cholesterol catabolism for synthesis of more bile acids (replaces cholesterol metabolism). However the decreased serum cholesterol levels are brought about by many other cumulative effects (water potential action of dietary fibres, glycemic index etc) (PMID: 15352566, Gannon P-Galley-MD (2010) Food & Function 1: 149-55) | Park SH, Bae H, Lee S, Lee HG (2009). Journal of Agricultural and Food Chemistry 57: 439-43, PMID: PMAC1843451, PMID: 17251929 | 0 | 3 |

|            |                                                                                                                                                       |                                                                                                                                                                                                                                                                                          |                                 |                                 |                                                                                                  |                                                                                                  |                                                                                                                                                                                                                                                                                                                                                                                                                                                                                                                                                                                                                                                                                                                                                                                                                                   |                                                                                                                                                        |   |   |
|------------|-------------------------------------------------------------------------------------------------------------------------------------------------------|------------------------------------------------------------------------------------------------------------------------------------------------------------------------------------------------------------------------------------------------------------------------------------------|---------------------------------|---------------------------------|--------------------------------------------------------------------------------------------------|--------------------------------------------------------------------------------------------------|-----------------------------------------------------------------------------------------------------------------------------------------------------------------------------------------------------------------------------------------------------------------------------------------------------------------------------------------------------------------------------------------------------------------------------------------------------------------------------------------------------------------------------------------------------------------------------------------------------------------------------------------------------------------------------------------------------------------------------------------------------------------------------------------------------------------------------------|--------------------------------------------------------------------------------------------------------------------------------------------------------|---|---|
| BGLYCHLs   | binding of homocysteine with intracellular, in the intestinal lumen, reducing serum cholesterol levels.                                               | $\text{hcy}[\text{c}] + \text{chole}[\text{c}] \rightarrow \text{pho}[\text{c}]\text{c}[\text{c}]$                                                                                                                                                                                       |                                 |                                 |                                                                                                  |                                                                                                  | oxidized form glucose forms binds the bile acids more effectively, hence glucose binds bile acids and leads to cholesterol excretion, then by the $\gamma$ -alpha hydroxylase pathway is activated leading to increased cholesterol catabolism for synthesis of new bile acids (regulates cholesterol metabolism). However the decreased serum cholesterol levels are brought about by many other cumulative effects (water neutral action of dietary fibres, glycaemic index etc) (PMID: 15327066, Ganesan P, Gidley MJ. (2010). Food & Function 1: 149-55).                                                                                                                                                                                                                                                                     | Park SY, Bae W, Lee S, Lee HG. (2008). Journal of Agricultural and Food Chemistry 57: 439-43. PMID: PMC2634351, PMID: 17251929                         | 0 | 3 |
| BGLYDECHNs | Binding of homocysteine with transhomocysteine in the intestinal lumen, reducing serum cholesterol levels.                                            | $\text{hcy}[\text{c}] + \text{chole}[\text{c}] \rightarrow \text{pho}[\text{c}]\text{c}[\text{c}]\text{c}[\text{c}]$                                                                                                                                                                     |                                 |                                 |                                                                                                  |                                                                                                  | oxidized form glucose forms binds the bile acids more effectively, hence glucose binds bile acids and leads to cholesterol excretion, then by the $\gamma$ -alpha hydroxylase pathway is activated leading to increased cholesterol catabolism for synthesis of new bile acids (regulates cholesterol metabolism). However the decreased serum cholesterol levels are brought about by many other cumulative effects (water neutral action of dietary fibres, glycaemic index etc) (PMID: 15327066, Ganesan P, Gidley MJ. (2010). Food & Function 1: 149-55).                                                                                                                                                                                                                                                                     | Park SY, Bae W, Lee S, Lee HG. (2008). Journal of Agricultural and Food Chemistry 57: 439-43. PMID: PMC2634351, PMID: 17251929                         | 0 | 3 |
| BTNTs      | release of histone across the brush border membrane                                                                                                   | $\text{hst}[\text{c}] \rightarrow \text{hst}[\text{c}]\text{c}[\text{c}]$                                                                                                                                                                                                                |                                 |                                 |                                                                                                  |                                                                                                  | histone released from the interaction along the brush border membrane is carrier protein mediated. Not independent and cholesterol oxidized protein mediated needs to be further investigated. However pancreatic acid seems to compete with histone for uptake, also in the presence of pancreatic, more amount of histone uptake (PMID: 15564315), with antacids (PMID: 15564315).                                                                                                                                                                                                                                                                                                                                                                                                                                              | PMID: 15564315, PMID: 21705221, G.F.M. Ball (2008) Vitamins: their role in the human body, Blackwell publishing, chapter 35, page 339-340.             | 0 | 1 |
| CARPTs     | transport of L-Carnitine by MPT3 or MPT4 peptide transporter.                                                                                         | $\text{car}[\text{c}] + \text{hst}[\text{c}] \rightarrow \text{car}[\text{c}]\text{c}[\text{c}] + \text{hst}[\text{c}]\text{c}[\text{c}]$                                                                                                                                                | 27416.1 or 27416.2 or 29273.1   | (3126.1 or 12126.1)             | Solute carrier family 15 member 3<br>Solute carrier family 15 member 4                           | Solute carrier family 15 member 3<br>Solute carrier family 15 member 4                           | MPT3 (human peptide transporter 3) transports histone and di-peptides from the lumen into the cytosol. Co-transporter protein, expressed in lung, thymus, spleen and fat in brain, placenta, liver, adrenal gland and heart (PMID: 12565252). MPT4 expressed in brain, placenta and ovary. Transports carnitine and histidine in a proton-coupled mechanism. (PMID: 12565252).                                                                                                                                                                                                                                                                                                                                                                                                                                                    | PMID: 16289537, PMID: 12565252, PMID: 17681807                                                                                                         | 1 | 4 |
| CARNICs    | hydrolysis of L-Carnitine for uptake                                                                                                                  | $\text{car}[\text{c}] + \text{hst}[\text{c}] \rightarrow \text{ala}[\text{c}]\text{c}[\text{c}] + \text{hst}[\text{c}]\text{c}[\text{c}]$                                                                                                                                                | (31843.1 or 6684.1)             | (64735.1 or 55748.1)            | Beta-Ala-His dipeptidase<br>Cytosolic, non-specific dipeptidase                                  | Beta-Ala-His dipeptidase or<br>Cytosolic, non-specific dipeptidase                               | Dipeptides and tripeptides enter the brush border of the intestinal mucosal cells, where they are hydrolyzed to the amino acids, which are then transported into hepatic portal vein. Peptides entering by transcellular or paracellular mechanisms elicit allergic reactions to food (Baker R, Murray, David A, Bender, Kathleen M, Brenner, Peter J, Kennedy, Victor W, Roelandt, P, Anthony, Neil) (2009) Nutrition, Elsevier, Elsevier, chapter 10, page 462). Histamine and hydrolysis of dipeptides is a reversible process (David L, Nelson, Michael M, Cox, Lehninger principles of biochemistry (2008), 3rd edition, worth publishers, page 49). Epinephrine CNI is expressed in brain where as CNI2 is more abundantly expressed (PMID: 12473676). Beta-1 is known to be involved in NADPH, which needs to be replaced. | PMID: 6955046, PMID: PMC1412251, PMID: 1935201, PMID: 20378671, PMID: 12473676                                                                         | 1 | 4 |
| CARPEPTs   | transport of L-Carnitine by the apical PEPT1 amino acid transporter across the brush border cells of the enterocytes of the intestine and renal cells | $\text{car}[\text{c}] + \text{hst}[\text{c}] \rightarrow \text{car}[\text{c}]\text{c}[\text{c}] + \text{hst}[\text{c}]\text{c}[\text{c}]$                                                                                                                                                | (61221.1 or 1364.1)             | (6564.1)                        | Solute carrier family 15 member 1                                                                | Solute carrier family 15 member 1                                                                | PEPT1 appears to transport all di- and tri- peptides across the brush border of the intestinal cells (Shenoy S, Groll, Jack L, Smith, James L, Groll (2009) Advanced nutrition and human metabolism, 5th edition, page 142-148). PEPT1 is expressed highly in intestinal cells, where as PEPT2 is localized to renal cells (PMID: 1655845).                                                                                                                                                                                                                                                                                                                                                                                                                                                                                       | PMID: 7803846, PMID: 14963252, PMID: 14977407, PMID: 10330547                                                                                          | 0 | 4 |
| CHTDS_1    | release of B12 by simple diffusion, reversible                                                                                                        | $\text{adv}[\text{c}]\text{c}[\text{c}] \rightarrow \text{adv}[\text{c}]\text{c}[\text{c}]\text{c}[\text{c}]$                                                                                                                                                                            |                                 |                                 |                                                                                                  |                                                                                                  | binds to transcobalamin II within the enterocyte before release into the portal blood.                                                                                                                                                                                                                                                                                                                                                                                                                                                                                                                                                                                                                                                                                                                                            | Soren S, Grogger, Jack L, Smith, James L, Groll (2009) Advanced nutrition and human metabolism, Blackwell-cengage learning, 5th edition, page 355-360. | 0 | 1 |
| CHLAs      | transport of Adenosine/cholesterol into the intestine                                                                                                 | $\text{adv}[\text{c}]\text{c}[\text{c}] \rightarrow \text{adv}[\text{c}]\text{c}[\text{c}]\text{c}[\text{c}]$                                                                                                                                                                            | (14013.1 or 49568.1 or 10382.1) | (2094.1 and 8291.1 or 8489.1)   | Gastric intrinsic factor<br>Cobalamin<br>Protein<br>intrinsic factor                             | Gastric intrinsic factor<br>Cobalamin<br>Protein<br>intrinsic factor                             | Cobalamin binds intrinsic factor and then the complex binds cobalamin and translocates (that serves as a vehicle for the receptor). Even though megalin (AMG) and receptor-associated protein (RAP) can interact with CUB, the precise role of any of these proteins in CUB mediated absorption of CUB has not been determined (PMID: PMC269119). Absorption of cobalamin can be enhanced by simple diffusion along the entire small intestine, this accounts for 3-7% of the dietary vitamins, however significant role under pharmacological doses (G.F.M. Ball (2008) Vitamins their role in the human body, Blackwell publishing, chapter 18, page 386).                                                                                                                                                                      | PMID: PMC269119, Jones Drenth, Robert R, Rucker, Donald D, McCormick, John W, Soren (2007) Handbook of vitamins, CRC press, chapter 31, page 118-122   | 0 | 4 |
| CHOLAICAs  | efflux of Cholesterol into the lymph                                                                                                                  | $\text{cho}[\text{c}]\text{c}[\text{c}] + \text{adv}[\text{c}]\text{c}[\text{c}] + \text{cho}[\text{c}]\text{c}[\text{c}]\text{c}[\text{c}] + \text{adv}[\text{c}]\text{c}[\text{c}]\text{c}[\text{c}] + \text{pg}[\text{c}]\text{c}[\text{c}] + \text{hst}[\text{c}]\text{c}[\text{c}]$ | 1133.1                          | (19.1)                          | ATP-binding cassette sub-family A member 1                                                       | ATP-binding cassette sub-family A member 1                                                       | ABCA1 is responsible for the efflux of cholesterol from the enterocytes into the lymph, for incorporation into nascent HDL, accounts for 30% of reverse cholesterol transfer (PMID: 21438575).                                                                                                                                                                                                                                                                                                                                                                                                                                                                                                                                                                                                                                    | PMID: 21185557, PMID: 18852846, PMID: 20454462                                                                                                         | 0 | 4 |
| CHOLABAs   | efflux of Cholesterol from the enterocytes into lumen                                                                                                 | $\text{cho}[\text{c}]\text{c}[\text{c}] + \text{adv}[\text{c}]\text{c}[\text{c}] + \text{cho}[\text{c}]\text{c}[\text{c}]\text{c}[\text{c}] + \text{adv}[\text{c}]\text{c}[\text{c}]\text{c}[\text{c}] + \text{pg}[\text{c}]\text{c}[\text{c}] + \text{hst}[\text{c}]\text{c}[\text{c}]$ | (2740.1 and 6747.1)             | (6424.1 and 6424.1)             | ATP-binding cassette sub-family G member 4<br>ATP-binding cassette sub-family G member 5         | ATP-binding cassette sub-family G member 4<br>ATP-binding cassette sub-family G member 5         | ABCA1 and ABCA2 are heterodimers, expressed in the enterocytes, involved in the efflux of the cholesterol from small intestine (i.e. Enterocytes) into the lumen (cells of the small intestine, to reduce cholesterol uptake).                                                                                                                                                                                                                                                                                                                                                                                                                                                                                                                                                                                                    | PMID: 18852846, PMID: 18852127, PMID: 15952510, PMID: 20454462                                                                                         | 0 | 4 |
| CHOLESTDs  | Transport, extracellular                                                                                                                              | $\text{cho}[\text{c}]\text{c}[\text{c}] \rightarrow \text{cho}[\text{c}]\text{c}[\text{c}]\text{c}[\text{c}]$                                                                                                                                                                            |                                 |                                 |                                                                                                  |                                                                                                  | transported in chylomicrons into lymph.                                                                                                                                                                                                                                                                                                                                                                                                                                                                                                                                                                                                                                                                                                                                                                                           | Soren S, Grogger, Jack L, Smith, James L, Groll (2009) Wadsworth cengage learning, Advanced nutrition and human metabolism, 5th edition, page 142-148. | 0 | 2 |
| CHOLETDs   | diffusion of cholesterol across the brush border membrane                                                                                             | $\text{cho}[\text{c}]\text{c}[\text{c}] \rightarrow \text{cho}[\text{c}]\text{c}[\text{c}]\text{c}[\text{c}]$                                                                                                                                                                            |                                 |                                 |                                                                                                  |                                                                                                  |                                                                                                                                                                                                                                                                                                                                                                                                                                                                                                                                                                                                                                                                                                                                                                                                                                   | Soren S, Grogger, Jack L, Smith, James L, Groll (2009) Wadsworth cengage learning, Advanced nutrition and human metabolism, 5th edition, page 142-148. | 1 | 2 |
| CHOLNPs    | uptake of Cholesterol from the lumen                                                                                                                  | $\text{cho}[\text{c}]\text{c}[\text{c}] \rightarrow \text{cho}[\text{c}]\text{c}[\text{c}]\text{c}[\text{c}]$                                                                                                                                                                            | 25706.1                         | (2988.1)                        | Niemann-Pick C3-like protein 1                                                                   | Niemann-Pick C3-like protein 1                                                                   | Niemann-Pick C3-like protein 1 is indispensable for internal uptake of cholesterol from the intestinal mucosa. SR-BI has an apparent role in the internal uptake of cholesterol and that NPC3L1 is mainly responsible (PMID: 14945966).                                                                                                                                                                                                                                                                                                                                                                                                                                                                                                                                                                                           | PMID: 21185557, PMID: 21022275, PMID: 20454462, PMID: 18852846, PMID: 14970316, PMID: 14945966                                                         | 0 | 4 |
| CYSATBAs   | transport of L-Cysteine into the intestinal cells by cATB transporter                                                                                 | $\text{cys}[\text{c}]\text{c}[\text{c}] + 2 \text{ na}[\text{c}]\text{c}[\text{c}] \rightarrow \text{cys}[\text{c}]\text{c}[\text{c}]\text{c}[\text{c}] + 2 \text{ na}[\text{c}]\text{c}[\text{c}]\text{c}[\text{c}] + \text{c}[\text{c}]\text{c}[\text{c}]$                             | 56794.1                         | (11284.1)                       | Sodium and chloride-dependent neutral and basic amino acid transporter Bc1                       | Sodium and chloride-dependent neutral and basic amino acid transporter Bc1                       | ATB1 is both sodium and chloride coupled, with sodium stoichiometry 2Na <sup>+</sup> :1Cl <sup>-</sup> :L-histidine acid. The transporter is located in the intestine, has a broad substrate specificity (both neutral and cationic amino acids), but is not involved in the transport of aspartate, glutamate and proline (PMID: 15155586).                                                                                                                                                                                                                                                                                                                                                                                                                                                                                      | PMID: 14970316                                                                                                                                         | 0 | 4 |
| CYSBATHAs  | transport of L-Cysteine by the apical neutral amino acid transporter cBATH and cBATH                                                                  | $\text{cys}[\text{c}]\text{c}[\text{c}] + \text{na}[\text{c}]\text{c}[\text{c}] \rightarrow \text{cys}[\text{c}]\text{c}[\text{c}]\text{c}[\text{c}] + \text{na}[\text{c}]\text{c}[\text{c}]\text{c}[\text{c}]$                                                                          | (78.1 or 4538.1 or 37564.1)     | (3424.1 and 37561.1 or 39272.1) | Sodium-dependent neutral amino acid transporter BcAT1 and CbAT1 or Aspartate-converting enzyme 2 | Sodium-dependent neutral amino acid transporter BcAT1 and CbAT1 or Aspartate-converting enzyme 2 | Transports all the neutral amino acids with preference for methionine, leucine and valine. Reaction heterodimeric with co-receptor protein for increased affinity. Found in kidney and intestine. However also reported to be expressed in skin. Regulates association with ABCG2 in expression in intestine but with co-receptor for expression in kidney.                                                                                                                                                                                                                                                                                                                                                                                                                                                                       | PMID: 19472176, PMID: 13842426, PMID: 18400892                                                                                                         | 0 | 4 |

|             |                                                                                                                                                                                   |                                                                            |                             |                      |                                                                                              |                                                                                                  |                                                                                                                                                                                                                                                                                                                                                                                                                                                                                                                                                                                                                       |                                                                                                                                                                                                                                                             |   |   |
|-------------|-----------------------------------------------------------------------------------------------------------------------------------------------------------------------------------|----------------------------------------------------------------------------|-----------------------------|----------------------|----------------------------------------------------------------------------------------------|--------------------------------------------------------------------------------------------------|-----------------------------------------------------------------------------------------------------------------------------------------------------------------------------------------------------------------------------------------------------------------------------------------------------------------------------------------------------------------------------------------------------------------------------------------------------------------------------------------------------------------------------------------------------------------------------------------------------------------------|-------------------------------------------------------------------------------------------------------------------------------------------------------------------------------------------------------------------------------------------------------------|---|---|
| CYGLX1c     | L-lysine/lysine exchanger                                                                                                                                                         | $cys\_14c1 + gblc1 > cys\_14c1 + gblc1$                                    | 8934.1 or 17284.1 or 8934.2 | (23428.1 and 692.1)  | Large neutral amino acid transporter small substrate 2 4F2 cells surface antigen heavy chain | Large neutral amino acid transporter small substrate 2 and 4F2 cells surface antigen heavy chain | Higher affinity for small neutral amino acids than LAT1, function as exchanger (transport system), at the basolateral surface of membranes in transporting epithelia. Localized in the proximal tubule of kidney, small intestine. Lower expression in ovary, placenta and brain.                                                                                                                                                                                                                                                                                                                                     | Phloges Arch-Bur J Physiol (2003) 440:503-512 DOI 10.1007/s00400000274, PMID: 12074070, J Am Soc Nephrol 14: 837-847, 200, Phloges Arch-Bur J Physiol (2003) 445:529-533 DOI 10.1007/s00400-003-0071-4, PMID: 18193068, Am J Physiol (2002) 281:C1077-C1081 | 0 | 4 |
| CYSRELAT2c  | transport of L-Cystine into the cell and efflux of L-homocysteine out of the cell by LAT2 on the basolateral surface of kidney and intestine.                                     | $cys\_14d1 + hc\_14c1 > cys\_14d1 + hc\_14c1$                              | (23593.1 and 17284.1)       | (23428.1 and 692.1)  | Large neutral amino acid transporter small substrate 2 4F2 cells surface antigen heavy chain | Large neutral amino acid transporter small substrate 2 and 4F2 cells surface antigen heavy chain | Higher affinity for small neutral amino acids than LAT1, function as exchanger (transport system), at the basolateral surface of membranes in transporting epithelia. Localized in the proximal tubule of kidney, small intestine. Lower expression in ovary, placenta and brain.                                                                                                                                                                                                                                                                                                                                     | Phloges Arch-Bur J Physiol (2003) 440:503-512 DOI 10.1007/s00400000274, PMID: 12074070, J Am Soc Nephrol 14: 837-847, 200, Phloges Arch-Bur J Physiol (2003) 445:529-533 DOI 10.1007/s00400-003-0071-4, PMID: 18193068, Am J Physiol (2002) 281:C1077-C1081 | 0 | 4 |
| CYSRELAT1c  | transport of L-Cystine into the cell and efflux of L-homocysteine out of the cell by LAT1 on the basolateral surface of kidney and intestine.                                     | $cys\_14d1 + phe\_14c1 > cys\_14d1 + phe\_14c1$                            | (23593.1 and 17284.1)       | (23428.1 and 692.1)  | Large neutral amino acid transporter small substrate 2 4F2 cells surface antigen heavy chain | Large neutral amino acid transporter small substrate 2 and 4F2 cells surface antigen heavy chain | Higher affinity for small neutral amino acids than LAT1, function as exchanger (transport system), at the basolateral surface of membranes in transporting epithelia. Localized in the proximal tubule of kidney, small intestine. Lower expression in ovary, placenta and brain.                                                                                                                                                                                                                                                                                                                                     | Phloges Arch-Bur J Physiol (2003) 440:503-512 DOI 10.1007/s00400000274, PMID: 12074070, J Am Soc Nephrol 14: 837-847, 200, Phloges Arch-Bur J Physiol (2003) 445:529-533 DOI 10.1007/s00400-003-0071-4, PMID: 18193068, Am J Physiol (2002) 281:C1077-C1081 | 0 | 4 |
| CYSNAT1c    | transport of L-Cystine into the cell coupled with co-transport with sodium and counter transport with protons by SNAAT transporter.                                               | $cys\_14d1 + na14c1 + hc1 > cys\_14d1 + na14c1 + hc1$                      | 28637.1                     | (92785.1)            | Sodium coupled neutral amino acid transporter 5                                              | Sodium coupled neutral amino acid transporter 5                                                  | SNAAT performs both co-transport with sodium and counter with protons, for the net transport of neutral amino acids into the cell. Cellular localization has been reported in stomach, brain, liver, lung, small intestine, spleen, colon and kidney. (PMID: 12845334)                                                                                                                                                                                                                                                                                                                                                | PMID: 12845334, PMCID: PMC1605133, PMID:18193068                                                                                                                                                                                                            | 1 | 4 |
| CYSTASRAT1c | transport of L-Cystine into the cell in exchange for L-homocysteine by Na <sup>+</sup> -AT transporter at the apical surface of the membranes of small intestine and renal cells. | $lysine1d1 + ala\_14c1 > lysine1d1 + ala\_14c1$                            | (3962.1 and 2932.1)         | (11136.1 and 6593.1) | BL<3>-type amino acid transporter 1 and Neutral and basic amino acid transport protein dRAT  | BL<3>-type amino acid transporter 1 and Neutral and basic amino acid transport protein dRAT      | sodium-independent antiport transport system, exchange of basic amino acids into the cells and neutral amino acids out of the cell. Localized on the apical surface of transporting epithelia. Cellular localization being small intestine, kidney (proximal tubule), lung, placenta, brain and thymus. Requires the heterodimerization with dRAT glycoprotein. (PMID: 10598334)                                                                                                                                                                                                                                      | PMID: 10598334, PMID: 19348071, PMID: 18193068, PMID: 11546643                                                                                                                                                                                              | 0 | 4 |
| CYSTSARAT1c | transport of L-Cystine into the cell in exchange for L-homocysteine by Na <sup>+</sup> -AT transporter at the apical surface of the membranes of small intestine and renal cells. | $lysine1d1 + his\_14c1 > lysine1d1 + his\_14c1$                            | (3962.1 and 2932.1)         | (11136.1 and 6593.1) | BL<3>-type amino acid transporter 1 and Neutral and basic amino acid transport protein dRAT  | BL<3>-type amino acid transporter 1 and Neutral and basic amino acid transport protein dRAT      | sodium-independent antiport transport system, exchange of basic amino acids into the cells and neutral amino acids out of the cell. Localized on the apical surface of transporting epithelia. Cellular localization being small intestine, kidney (proximal tubule), lung, placenta, brain and thymus. Requires the heterodimerization with dRAT glycoprotein. (PMID: 10598334)                                                                                                                                                                                                                                      | PMID: 10598334, PMID: 19348071, PMID: 18193068, PMID: 11546643                                                                                                                                                                                              | 0 | 4 |
| DACRST1d    | diffusion of D-acyl glycerol across the brush border membrane                                                                                                                     | $dag\_hs1d <== dag\_hs1d$                                                  |                             |                      |                                                                                              |                                                                                                  | 0                                                                                                                                                                                                                                                                                                                                                                                                                                                                                                                                                                                                                     | Sargent S, Grogger, Jack L, Smith, James L, Groll (2005) Wadsworth copyright learning, Advanced nutrition and human metabolism, 5th edition, page 145-146.                                                                                                  | 1 | 2 |
| EFADABP1c   | spike of dicarboxylate anion and by the anionocytes                                                                                                                               | $malic1d1 > malic1d1$                                                      | (14719.1 or 12491.1)        | (26.1 or 948.1)      | Aspartate aminotransferase, mitochondrial, Pantoic glyoxysome 4                              | Aspartate aminotransferase, mitochondrial or Pantoic glyoxysome 4                                | GEF2 encodes FABPins that may either act alone or in co-ordination with CD36, for the uptake of long chain fatty acids (confers a selective preference for long chain PFA and essential fatty acids over non-essential fatty acids). The fatty acids themselves can undergo peroxidation, once inside the cell, they bind to the cytoplasmic fatty acid binding protein (FABP) and thereby undergo activation or esterification. Additionally, a variety of fatty acids are thought to be transported by FATP1 and equally activated by plasmalogen acyl-CoA synthetase (ACS1) in form of Co-enzyme. (PMID: 20080080) | PMID: 20080080, PMID: 12817080, PMID: 8724621, Progress in Lipid Research Volume 48, Issue 2, March 2005, Pages 105-115                                                                                                                                     | 0 | 4 |
| FOCT1d      | folate uptake into the anionocytes                                                                                                                                                | $fol1d > fol1d$                                                            |                             |                      |                                                                                              |                                                                                                  | spike by diffusion.                                                                                                                                                                                                                                                                                                                                                                                                                                                                                                                                                                                                   | G.F.M. Ball (2006) Vitamins their role in the human body, Blackwell publishing, chapter 17, issue 39.                                                                                                                                                       | 0 | 3 |
| FOCT1c      | folate uptake into the anionocytes                                                                                                                                                | $fol1d + fol1c > fol1d + fol1c$                                            | 299.1 or 299.2              | (11325.1)            | Proton coupled folate transporter                                                            | Proton coupled folate transporter                                                                | cancer protein-mediated, H <sup>+</sup> transport. Maximum in this gene is associated with hereditary folate malabsorption syndrome (HFM) (PMID: 10762435)                                                                                                                                                                                                                                                                                                                                                                                                                                                            | G.F.M. Ball (2006) Vitamins their role in the human body, Blackwell publishing, chapter 17, page 321, PMID: 19724412.                                                                                                                                       | 0 | 3 |
| GABAPAT1c   | transport of GABA by PAT1 in renal and intestinal cells.                                                                                                                          | $gab1d1 + hba1 > gab1d1 + hba1$                                            | 215338.1                    | (26588.1)            | Proton coupled amino acid transporter 1                                                      | Proton coupled amino acid transporter 1                                                          | PAT1 proton amino acid co-transporter with 11 transmembranes, does not discriminate between L and D-isomers, based on the apical membrane of kidney and intestine (PMID: 14840052, PMID: 18193068)                                                                                                                                                                                                                                                                                                                                                                                                                    | PMID: 17123464, PMID: 18400502, PMCID: PMC146477, PMID: 15456586, PMID: 13205808                                                                                                                                                                            | 0 | 4 |
| GALSGLT1d   | transport of D-Galactose from extracellular space to cytosol of mucosal cells in small intestine                                                                                  | $gal1d1 + 2 na14c1 + sglc1 > gal1d1 + 2 na14c1 + sglc1 + p1c1 + hc1$       | 2937.1                      | (6523.1)             | Sodium/glucose cotransporter 1                                                               | Sodium/glucose cotransporter 1                                                                   | SGLT-1 can also transport sugars coupled with H <sup>+</sup> (instead of Na <sup>+</sup> , only condition of decreased extra-cellular pH. However, the affinity for glucose decreases with H <sup>+</sup> coupled transport. (PMID: 17462201). The transport system is regulated by Na <sup>+</sup> /ATPase activity (PMID: 7750875). Journal of animal science (2003) volume 95. (E supply) EMB 8723. Reversible transport in SGLT-1 has been suggested in a 6-site model in PMCID: PMC3000213.                                                                                                                      | PMID: 20522896, PMID: 16642895, Sargent S, Grogger, Jack L, Smith, James L, Groll (2005) Advanced nutrition and human metabolism, Wadsworth copyright learning, 5th edition, page 71-72                                                                     | 0 | 4 |
| GLCSGLT1d   | transport of D-glucose from lumen to cytosol of mucosal cells in small intestine                                                                                                  | $glc\_14d1 + 2 na14c1 + sglc1 > glc\_14d1 + 2 na14c1 + sglc1 + p1c1 + hc1$ | 2937.1                      | (6523.1)             | Sodium/glucose cotransporter 1                                                               | Sodium/glucose cotransporter 1                                                                   | SGLT-1 can also transport sugars coupled with H <sup>+</sup> (instead of Na <sup>+</sup> , only condition of decreased extra-cellular pH. However, the affinity for glucose decreases with H <sup>+</sup> coupled transport. (PMID: 17462201). The transport system is regulated by Na <sup>+</sup> /ATPase activity (PMID: 7750875). Journal of animal science (2003) volume 95. (E supply) EMB 8723. Reversible transport in SGLT-1 has been suggested in a 6-site model in PMCID: PMC3000213.                                                                                                                      | PMID: 20522896, PMID: 16642895, Sargent S, Grogger, Jack L, Smith, James L, Groll (2005) Advanced nutrition and human metabolism, Wadsworth copyright learning, 5th edition, page 71-72                                                                     | 0 | 4 |
| GLNDFABP1c  | spike of gamma lipoic acid and by the anionocytes                                                                                                                                 | $lipo1d1 > lipo1d1$                                                        | (14719.1 or 12491.1)        | (26.1 or 948.1)      | Aspartate aminotransferase, mitochondrial, Pantoic glyoxysome 4                              | Aspartate aminotransferase, mitochondrial or Pantoic glyoxysome 4                                | GEF2 encodes FABPins that may either act alone or in co-ordination with CD36, for the uptake of long chain fatty acids (confers a selective preference for long chain PFA and essential fatty acids over non-essential fatty acids). The fatty acids themselves can undergo peroxidation, once inside the cell, they bind to the cytoplasmic fatty acid binding protein (FABP) and thereby undergo activation or esterification. Additionally, a variety of fatty acids are thought to be transported by FATP1 and equally activated by plasmalogen acyl-CoA synthetase (ACS1) in form of Co-enzyme. (PMID: 20080080) | PMID: 20080080, PMID: 12817080, PMID: 8724621, Progress in Lipid Research Volume 48, Issue 2, March 2005, Pages 105-115                                                                                                                                     | 0 | 4 |
| GLNAT10c    | transport of L-Glutamine into the intestinal cells by ATRB transporter                                                                                                            | $gln\_14d1 + 2 na14c1 + c14d1 > gln\_14d1 + 2 na14c1 + c14c1$              | 56774.1                     | (11254.1)            | Sodium and chloride dependent neutral and basic amino acid transporter Bc1                   | Sodium and chloride dependent neutral and basic amino acid transporter Bc1                       | ATRB is both sodium and chloride coupled, with reaction mechanism 2Na <sup>+</sup> -1Cl <sup>-</sup> latter acid. The transporter is localized in the mucosa, has a broad substrate specificity (both neutral and cationic amino acids), but is not involved in the transport of arginine, glutamine and proline (PMID 18193068).                                                                                                                                                                                                                                                                                     | PMID:18193068                                                                                                                                                                                                                                               | 0 | 4 |

|            |                                                                                                                                                   |                                                              |                                  |                                 |                                                                                                       |           |                                                                                                        |                                   |                                                                                                                                                                                                                                                                                                                                                                                                                                                   |                                                                                                                                                                                                                                                                                                                                                                                                               |   |   |
|------------|---------------------------------------------------------------------------------------------------------------------------------------------------|--------------------------------------------------------------|----------------------------------|---------------------------------|-------------------------------------------------------------------------------------------------------|-----------|--------------------------------------------------------------------------------------------------------|-----------------------------------|---------------------------------------------------------------------------------------------------------------------------------------------------------------------------------------------------------------------------------------------------------------------------------------------------------------------------------------------------------------------------------------------------------------------------------------------------|---------------------------------------------------------------------------------------------------------------------------------------------------------------------------------------------------------------------------------------------------------------------------------------------------------------------------------------------------------------------------------------------------------------|---|---|
| GLN8ATNc   | transport of L-Glutamine by the apical neutral amino acid transporters in kidney and intestine                                                    | $gh_1Ldc + m1dc \rightarrow gh_1Lc + m1c$                    | (78.1 or (1438.1 and 17384.1))   | (1428.1 and (17391.1 or 19272)) | Sodium dependent neutral amino acid transporter B/LAT1<br>Collective Arginine/serine co-transporter 2 | 3.4.17.23 | Sodium-dependent neutral amino acid transporter B/LAT1 and Collective Arginine/serine co-transporter 2 | Aspartic acid-converting enzyme 2 | transport all the neutral amino acids with preference for methionine, leucine and valine. Regulate methioninemia in L1. Regulate homeostasis with collecting protein for increased affinity. Found in kidney and intestine, however also reported to be expressed in skin. Regulates association with AC32 for expression in intestine but with collecting for expression in kidney.                                                              | PMID:13947275, PMID:15854236, PMID:18490092                                                                                                                                                                                                                                                                                                                                                                   | 0 | 4 |
| GLN9ELATNc | transport of L-Glutamine into the cell and efflux of L-leucine out of the cell by LAT2 on the basolateral surfaces of kidney and intestine.       | $gh_1Ldc + l6c_1Lc \rightarrow gh_1Lc + l6c_1$               | (2599.1 and 17254.1)             | (23428.1 and 692.1)             | Large neutral amino acid transporter small subunit 2 402 cell-surface antigen heavy chain             |           | Large neutral amino acid transporter small subunit 2 and 402 cell-surface antigen heavy chain          |                                   | Higher affinity for small neutral amino acids than LAT1. function as exchanger (anion/serine) at the basolateral surface of membranes in transporting epithelia. Localized in the proximal tubule of kidney, small intestine. Lower expression in ovary, placenta and brain. Homodimerization with CD-98 for trafficking of the complex to the membrane. (Pflieger Arch Eur J Physiol (2003) 440:503-512 DOI 10.1007/s00424000274). PMID:12074070 | Pflieger Arch Eur J Physiol (2003) 440:503-512 DOI 10.1007/s0042400000274, PMID:12074070, J Am Soc Nephrol 14: 827-841, 2003, Pflieger Arch Eur J Physiol (2003) 440:529-533 DOI 10.1007/s00424-002-0071-x, PMID:18193088, Am J Physiol (2003) 285:C1077-C1081.                                                                                                                                               | 0 | 4 |
| GLN1LATNc  | transport of L-Glutamine by LAT1 in association with 4F2c, across the apical surface of the membrane.                                             | $gh_1Ldc + l6c_1Lc \rightarrow gh_1Lc + l6c_1$               | (2599.1 and 17294.1)             | (614.1 and 692.1)               | Large neutral amino acid transporter small subunit 1 402 cell-surface antigen heavy chain             |           | Large neutral amino acid transporter small subunit 1 and 402 cell-surface antigen heavy chain          |                                   | Arginine is the only amino acid tested for efflux. Expressed in ovary, placenta, brain, spleen, testis, activated lymphocytes and cancer tumor cells. Function as a symport transporter system (DOI: 10.1016/j.cll.2009.01.02), requires homodimerization with Rhopropin CD98 (Pflieger Arch Eur J Physiol (2003) 440:503-512, DOI 10.1007/s00424000274, PMID:12074070).                                                                          | Hans Gerhard Vogel, Peter J. Mock, Jochem Meas, Dieter Mayer (2006). Drug discovery and evaluation: Safety and pharmacokinetic assays, Springer publication, Chapter II D, page 656, table 2, PMID:16972320, PMID:12310421, European Journal of Pharmacology 441 (2002) 127-132, Am J Physiol Cell Physiol 281:C1077-C1081, 2003, Amino Acids (2002) 29: 229-233 DOI 10.1007/s00726-005-0221-x, PMID:11903210 | 0 | 4 |
| GLN9ELATNc | transport of L-Glutamine into the cell and efflux of L-Phenylalanine out of the cell by LAT2 on the basolateral surfaces of kidney and intestine. | $gh_1Ldc + ph_1Lc \rightarrow gh_1Lc + ph_1Lc$               | (2599.1 and 17294.1)             | (23428.1 and 692.1)             | Large neutral amino acid transporter small subunit 2 402 cell-surface antigen heavy chain             |           | Large neutral amino acid transporter small subunit 2 and 402 cell-surface antigen heavy chain          |                                   | Higher affinity for small neutral amino acids than LAT1. function as exchanger (anion/serine) at the basolateral surface of membranes in transporting epithelia. Localized in the proximal tubule of kidney, small intestine. Lower expression in ovary, placenta and brain. Homodimerization with CD-98 for trafficking of the complex to the membrane. (Pflieger Arch Eur J Physiol (2003) 440:503-512 DOI 10.1007/s00424000274).               | Pflieger Arch Eur J Physiol (2003) 440:503-512 DOI 10.1007/s004240000274, PMID:12074070, J Am Soc Nephrol 14: 827-841, 2003, Pflieger Arch Eur J Physiol (2003) 440:529-533 DOI 10.1007/s00424-002-0071-x, PMID:18193088, Am J Physiol (2003) 285:C1077-C1081.                                                                                                                                                | 0 | 4 |
| GLN1LATNc  | transport of L-Glutamine by y-LAT1 or y-LAT2 transporters in small intestine and kidney                                                           | $gh_1Ldc + m1c + arg_1Lc \rightarrow gh_1Lc + m1c + arg_1Lc$ | (284.1 or (13836.1 and 17284.1)) | (958.1 or 957.1 and (692.1))    | Y-L amino acid transporter 1 Y-L amino acid transporter 2 402 cell-surface antigen heavy chain        |           | Y-L amino acid transporter 1 or Y-L amino acid transporter 2 and 402 cell-surface antigen heavy chain  |                                   | y-LAT1 and y-LAT2 transporters require CD98 for transport/trafficking to the plasma membrane. Act as an anion acid exchanger, with efflux of neutral amino acids and efflux of anionic amino acid, requires Na+ for optimal activity. Can also operate with H+ in absence of Na+ (PMID:11546645).                                                                                                                                                 | PMID:11546645, PMID:18193088                                                                                                                                                                                                                                                                                                                                                                                  | 0 | 4 |
| GLN1LATNc  | transport of Glutamine by y-LAT1 or y-LAT2 with co-transport of H in small intestine and kidney                                                   | $gh_1Ldc + Hc + arg_1Lc \rightarrow gh_1Lc + Hc + arg_1Lc$   | (284.1 or (13836.1 and 17284.1)) | (958.1 or 957.1 and (692.1))    | Y-L amino acid transporter 1 Y-L amino acid transporter 2 402 cell-surface antigen heavy chain        |           | Y-L amino acid transporter 1 or Y-L amino acid transporter 2 and 402 cell-surface antigen heavy chain  |                                   | y-LAT1 and y-LAT2 transporters require CD98 for transport/trafficking to the plasma membrane. Act as an anion acid exchanger, with efflux of neutral amino acids and efflux of anionic amino acid, requires Na+ for optimal activity. Can also operate with H+ in absence of Na+ (PMID:11546645).                                                                                                                                                 | PMID:11546645, PMID:18193088                                                                                                                                                                                                                                                                                                                                                                                  | 0 | 4 |
| GLYAT8Nc   | transport of Glycine into the intestinal cells by ATB9 transporter                                                                                | $gh1dc + 2 m1dc + c1dc \rightarrow gh1c + 2 m1c + c1c$       | 56774.1                          | (11284.1)                       | Sodium and chloride dependent neutral and basic amino acid transporter B(-)                           |           | Sodium and chloride dependent neutral and basic amino acid transporter B(-)                            |                                   | ATB9 is both sodium and chloride co-transport, with sodium stoichiometry 2Na+:1c1:histidine acid. The transporter is localized in the vacuoles, has a broad substrate specificity (both neutral and anionic amino acids) but is not involved in the transport of aspartate, glutamate and proline (PMID:18193088).                                                                                                                                | PMID:18193088                                                                                                                                                                                                                                                                                                                                                                                                 | 0 | 4 |

|             |                                                                                                                                                                   |                                                   |                                |                                   |                                                                                                            |                        |                                                                                                                |                                   |                                                                                                                                                                                                                                                                                                                                                                                                                                                                                                                                                                                                                                                                                                                                                                             |                                                                                                                                                                                                                         |   |   |
|-------------|-------------------------------------------------------------------------------------------------------------------------------------------------------------------|---------------------------------------------------|--------------------------------|-----------------------------------|------------------------------------------------------------------------------------------------------------|------------------------|----------------------------------------------------------------------------------------------------------------|-----------------------------------|-----------------------------------------------------------------------------------------------------------------------------------------------------------------------------------------------------------------------------------------------------------------------------------------------------------------------------------------------------------------------------------------------------------------------------------------------------------------------------------------------------------------------------------------------------------------------------------------------------------------------------------------------------------------------------------------------------------------------------------------------------------------------------|-------------------------------------------------------------------------------------------------------------------------------------------------------------------------------------------------------------------------|---|---|
| GLYT8ATn    | transport of Glycine by the apical neutral amino acid transporters in kidney and intestine                                                                        | $gly[6] + na[1q] > gly[6] + na[1c]$               | (78.1 or (4438.1 and 57384.1)) | (3428.1 and (57393.1 or 59272.1)) | Sodium dependent neutral amino acid transporter B <sub>0</sub> AT1/Collective Arginine-converting enzyme 2 | 3.4.17.23              | Sodium-dependent neutral amino acid transporter B <sub>0</sub> AT1 and Collective Arginine-converting enzyme 2 | Aspartic acid-converting enzyme 2 | transport all the neutral amino acids with preference for methionine, leucine and valine. Reaction mechanism is 1:1. Requires internalization with collecting process for increased affinity. Found in kidney and intestine, however also reported to be expressed in skin. Requires association with AC32 for expression in intestine but with collectin for expression in kidney.                                                                                                                                                                                                                                                                                                                                                                                         | PMID: 19472175, PMID: 15854236, PMID: 18400892                                                                                                                                                                          | 0 | 4 |
| GLYGLYCn    | hydrolysis of glycylglycine for uptake                                                                                                                            | $gly[6c] + h2o[c] <=> gly[6] + h2o[c]$            | (37843.1 or 6654.1)            | (84735.1 or 55758.1)              | Beta-Ala-His dipeptidase Cytosolic non-specific dipeptidase                                                | 3.4.13.2 or 3.4.13.18  | Beta-Ala-His dipeptidase or Cytosolic non-specific dipeptidase                                                 |                                   | Dipeptides and tripeptides enter the brush border of the intestinal mucosal cells, where they are hydrolyzed to free amino acids, which are then transported into hepatic portal vein. Peptides entering by transcellular or paracellular mechanism elicit allergic reactions in food (Rohrer & Merry, David A. Bender, Kathleen M. Bolton, Peter J. Isenhardt, Victor W. Rodwell, P. Anthony Weil (2009) 2nd edition, Elsevier, Molecular Biochemistry, Mc Graw Hill, page 462). Intestine and hydrolysis of glycylglycine is a controlled process (David L. Nelson, Michael M. Cox, Lehninger principles of biochemistry (2005), 3rd edition, worth publishers page 69). Epine has CNI is expressed in brain where as CNI2 is more abundantly expressed (PMID: 12473676). | PMID: 8593848, PMID: PMIC1412501, PMID: 46520261, PMID: 20176071, PMID: 12473676                                                                                                                                        | 1 | 4 |
| GLYGLYPEPTn | transport of Glycyl-glycine by the apical PEPT1 amino acid transporters across the brush border cells of the enterocytes of the intestine and renal cells         | $gly[6c] + h2o > gly[6c] + h2o$                   | 215338.1                       | (6564.1)                          | Solute carrier family 15 member 1                                                                          |                        | Solute carrier family 15 member 1                                                                              |                                   | PEPT1 appears to transport all di-and tri- peptides across the brush border of the intestinal cells (Shenon S. Groppe, Jack L. Smith, James L. Goff (2009) Advanced nutrition and human metabolism, Wileys-Blackwell, 5th edition, page 191). PEPT1 is expressed highly in intestinal cells where as PEPT2 is localized to renal cells (PMID: 10330047).                                                                                                                                                                                                                                                                                                                                                                                                                    | PMID: 7658846, PMID: 14963252, PMID: 14977407, PMID: 10330047                                                                                                                                                           | 0 | 4 |
| GLYGLYHYDRA | hydrolysis of Glycylhistidine in renal small intestine for cellular uptake                                                                                        | $gly[6c] + h2o[c] <=> gly[6] + his_2[c]$          | (13479.1 or 6654.1)            | (18.1 or 55748.1)                 | membrane dipeptidase cytosolic non-specific dipeptidase                                                    | 3.4.13.19 or 3.4.13.18 | membrane dipeptidase or cytosolic non-specific dipeptidase                                                     |                                   | BRENDA also lists beta-Ala-His dipeptidase (E.C. 3.4.13.2) as another enzyme catalyzing this reaction, but no literature evidence found.                                                                                                                                                                                                                                                                                                                                                                                                                                                                                                                                                                                                                                    | PMID: 4674031, PMID: 654683                                                                                                                                                                                             | 1 | 4 |
| GLYGLYPEPTn | transport of Glycylglycine by the apical PEPT1 amino acid transporters across the brush border cells of the enterocytes of the intestine and renal cells          | $gly[6c] + h2o > gly[6c] + h2o$                   | 215338.1                       | (6564.1)                          | Solute carrier family 15 member 1                                                                          |                        | Solute carrier family 15 member 1                                                                              |                                   | PEPT1 appears to transport all di-and tri- peptides across the brush border of the intestinal cells (Shenon S. Groppe, Jack L. Smith, James L. Goff (2009) Advanced nutrition and human metabolism, Wileys-Blackwell, 5th edition, page 191). PEPT1 is expressed highly in intestinal cells where as PEPT2 is localized to renal cells (PMID: 10330047).                                                                                                                                                                                                                                                                                                                                                                                                                    | PMID: 7658846, PMID: 14963252, PMID: 14977407, PMID: 10330047                                                                                                                                                           | 0 | 4 |
| GLYPA1n     | transport of Glycine by the apical PAT2 or PAT1 amino acid transporters in kidney and intestine                                                                   | $gly[6] + h2o > gly[6] + h2o$                     | 215338.1                       | (26384.1)                         | Proton-coupled amino acid transporter 1                                                                    |                        | Proton-coupled amino acid transporter 1                                                                        |                                   | PAT2 is strongly expressed in heart and lung and more weakly in kidney and muscle (PMID: 14960602). PAT2 co-also transport glycine bidirectionally, depending on the membrane potential and substrate: proton gradient (PMID: 14960603). PAT1 proton-coupled amino acid co-transporter with 1:1 stoichiometry, does not discriminate between L- and D-isomers, located on the apical membrane of kidney and intestine (PMID: 14406062, PMID: 14959886).                                                                                                                                                                                                                                                                                                                     | PMID: 18139288, PMID: 18400892, PMID: 17223466, PMID: PMIC146647, PMID: 15345688                                                                                                                                        | 0 | 4 |
| GLYTRPEPTn  | transport of Glycylphenylalanine by the apical PEPT1 amino acid transporters across the brush border cells of the enterocytes of the intestine and renal cells    | $gly[6c] + h2o > gly[6c] + h2o$                   | 215338.1                       | (6564.1)                          | Solute carrier family 15 member 1                                                                          |                        | Solute carrier family 15 member 1                                                                              |                                   | PEPT1 appears to transport all di-and tri- peptides across the brush border of the intestinal cells (Shenon S. Groppe, Jack L. Smith, James L. Goff (2009) Advanced nutrition and human metabolism, Wileys-Blackwell, 5th edition, page 191). PEPT1 is expressed highly in intestinal cells where as PEPT2 is localized to renal cells (PMID: 10330047).                                                                                                                                                                                                                                                                                                                                                                                                                    | PMID: 7658846, PMID: 14963252, PMID: 14977407, PMID: 10330047                                                                                                                                                           | 0 | 4 |
| GLYTRPEPTn  | transport of Glycylphenylalanine by the apical PEPT1 amino acid transporters across the brush border cells of the enterocytes of the intestine and renal cells    | $gly[6c] + h2o > gly[6c] + h2o$                   | 215338.1                       | (6564.1)                          | Solute carrier family 15 member 1                                                                          |                        | Solute carrier family 15 member 1                                                                              |                                   | PEPT1 appears to transport all di-and tri- peptides across the brush border of the intestinal cells (Shenon S. Groppe, Jack L. Smith, James L. Goff (2009) Advanced nutrition and human metabolism, Wileys-Blackwell, 5th edition, page 191). PEPT1 is expressed highly in intestinal cells where as PEPT2 is localized to renal cells (PMID: 10330047).                                                                                                                                                                                                                                                                                                                                                                                                                    | PMID: 7658846, PMID: 14963252, PMID: 14977407, PMID: 10330047                                                                                                                                                           | 0 | 4 |
| GLYTRPROG   | hydrolysis of Prolylglycine in the small intestine for cellular uptake                                                                                            | $gly[6c] + h2o[c] <=> gly[6] + pro_2[c]$          | 18624.1                        | (5184.1)                          | Xaa-Pro dipeptidase                                                                                        | 3.4.13.9               | Xaa-Pro dipeptidase                                                                                            |                                   | proline 1 and 2 both have same E.C. Number, proline 1 has a substrate preference for glycylproline where as proline 2 catalyzes very slowly this reaction (PMID: 14960546).                                                                                                                                                                                                                                                                                                                                                                                                                                                                                                                                                                                                 | PMID: 14960546, PMID: 20176203, PMID: 14963804, Rubino A, Pierre M, Torretta GL, Vetralla M, Martino SD, Aurilio S. (2008) Pediatric Research 3: 313-9. 14960546.                                                       | 1 | 4 |
| GLYSARCn    | hydrolysis of glycylsarcosine for uptake                                                                                                                          | $gly[6c] + h2o[c] <=> gly[6] + sarc[c]$           | 12751.1                        | (12.1)                            | Tripeptidyl-peptidase 1                                                                                    | 3.4.14.9               | Tripeptidyl-peptidase 1                                                                                        |                                   | Glycine sarcosine is resistant to hydrolysis and the only enzyme to catalyze hydrolysis is proline or other enzyme (PMID: 14960546). Further glycine sarcosine and glycylsarcosine have been assumed to have a common transport system, B may also maintain them (PMID: 3293467).                                                                                                                                                                                                                                                                                                                                                                                                                                                                                           | PMID: 4746551, PMID: 4778546, PMID: 7172221, PMID: 1029467                                                                                                                                                              | 1 | 3 |
| GLYSARPEPTn | transport of Glycylsarcosine by the apical PEPT1 amino acid transporters across the brush border cells of the enterocytes of the intestine, renal cells and brain | $gly[6c] + h2o > gly[6c] + h2o$                   | 215338.1                       | (6564.1)                          | Solute carrier family 15 member 1                                                                          |                        | Solute carrier family 15 member 1                                                                              |                                   | PEPT1 appears to transport all di-and tri- peptides across the brush border of the intestinal cells (Shenon S. Groppe, Jack L. Smith, James L. Goff (2009) Advanced nutrition and human metabolism, Wileys-Blackwell, 5th edition, page 191). PEPT1 is expressed highly in intestinal cells where as PEPT2 is localized to renal cells (PMID: 10330047). glycine sarcosine is also transported across the brain specifically by PEPT1 (PMID: 20971825).                                                                                                                                                                                                                                                                                                                     | PMID: 7658846, PMID: 14963252, PMID: 14977407, PMID: 10330047                                                                                                                                                           | 0 | 4 |
| GLYSNATn    | transport of Glycine into the cell coupled with co-transport with sodium and counter transport with protons by SNAT5 transporter                                  | $gly[6] + na[1q] + h2o <=> gly[6] + na[1c] + h2o$ | 28637.1                        | (92743.1)                         | Sodium coupled neutral amino acid transporter 5                                                            |                        | Sodium-coupled neutral amino acid transporter 5                                                                |                                   | SNAT5 performs both co-transport with sodium and transport with protons, for the net transport of neutral amino acid into the cell. Cellular localization has been reported in stomach, brain, liver, lung, small intestine, spleen, colon and kidney (PMID: 12445536).                                                                                                                                                                                                                                                                                                                                                                                                                                                                                                     | PMID: 12445536, PMID: PMIC1465113, PMID: 18139288                                                                                                                                                                       | 1 | 4 |
| GUMCHLa     | Handling of gut gases with dimethylsulphonic acid in the intestinal lumen, reducing serum cholesterol levels.                                                     | $gut[6] + h2o[c] > gut[6] + h2o[c]$               |                                |                                   |                                                                                                            |                        |                                                                                                                |                                   | gut gases handle bile acids and leads to enhanced excretion, done by the 1- alpha hydroxylase pathway is activated leading to increased cholesterol catabolism for synthesis of more bile acids (regulates cholesterol metabolism). However the decreased serum-cholesterol levels are brought about by many other cumulative effects (water mediated action of dietary fibres, glyceric acids etc) (PMID: 15327046, Gnanap P. Gidley ME (2010). Food & Function 1: 149-55).                                                                                                                                                                                                                                                                                                | PMID: 23811870, PMID: 7825234, McFadden B, Dicks P, Groeneweyer G, Harris R, O'Connor C. (2011). Minerals Engineering 24: 463-9. 7. Pandolf and F.M. Caplanide (1992) Journal of food science, vol 57, no 5, 1242-1245. | 0 | 3 |
| GUMCHLa     | Handling of gut gases with glycerolulphonic acid in the intestinal lumen, reducing serum cholesterol levels.                                                      | $gut[6] + h2o[c] > gut[6] + h2o[c]$               |                                |                                   |                                                                                                            |                        |                                                                                                                |                                   | gut gases handle bile acids and leads to enhanced excretion, done by the 1- alpha hydroxylase pathway is activated leading to increased cholesterol catabolism for synthesis of more bile acids (regulates cholesterol metabolism). However the decreased serum-cholesterol levels are brought about by many other cumulative effects (water mediated action of dietary fibres, glyceric acids etc) (PMID: 15327046, Gnanap P. Gidley ME (2010). Food & Function 1: 149-55).                                                                                                                                                                                                                                                                                                | PMID: 23811870, PMID: 7825234, McFadden B, Dicks P, Groeneweyer G, Harris R, O'Connor C. (2011). Minerals Engineering 24: 463-9. 7. Pandolf and F.M. Caplanide (1992) Journal of food science, vol 57, no 5, 1242-1245. | 0 | 3 |

|           |                                                                                                                                                  |                                                                                     |                                 |                                 |                                                                                                            |                                                                                                               |                                                                                                                                                                                                                                                                                                                                                                                                                                                                                                                                                                                                                                     |                                                                                                                                                                                                                                                                                                                                                                                                                |   |   |
|-----------|--------------------------------------------------------------------------------------------------------------------------------------------------|-------------------------------------------------------------------------------------|---------------------------------|---------------------------------|------------------------------------------------------------------------------------------------------------|---------------------------------------------------------------------------------------------------------------|-------------------------------------------------------------------------------------------------------------------------------------------------------------------------------------------------------------------------------------------------------------------------------------------------------------------------------------------------------------------------------------------------------------------------------------------------------------------------------------------------------------------------------------------------------------------------------------------------------------------------------------|----------------------------------------------------------------------------------------------------------------------------------------------------------------------------------------------------------------------------------------------------------------------------------------------------------------------------------------------------------------------------------------------------------------|---|---|
| GATMCKRL  | binding of <i>gene gata</i> with <i>intermediate</i> in the intestinal lumen, reducing serum cholesterol levels.                                 | $gata(c) + chole(c) \rightarrow gata(b)(c)$                                         |                                 |                                 |                                                                                                            |                                                                                                               | gene gata binds acids and leads to enhanced excretion, then by the 1. alpha hydroxylase pathway is activated leading to increased cholesterol metabolism, however the decreased serum cholesterol levels are brought about by many other compensatory effects (water retention, action of dietary fibre, glycemic index, etc.) (PMID: 15122466, Ganes P, Gidley ME (2010). Food & Function 1: 149-55)                                                                                                                                                                                                                               | PMID: 23611380, PMID: 18292324, McAllister S, Dicks F, Greenberger G, Harris R, O'Connor C (2011). Minerals Engineering 24: 469-9, T Penderel and F.M. Clydesdale (1992) Journal of Food Science, vol 57, no.3, 1243-1245.                                                                                                                                                                                     | 0 | 3 |
| HSCAT1    | transport of L-Histidine by <i>yo</i> transporter                                                                                                | $hs_{-}L(c) \rightleftharpoons hs_{-}L(d)$                                          | 11987.1                         | (6541.1)                        | High affinity cationic amino acid transporter 1                                                            | High affinity cationic amino acid transporter 1                                                               | abnormally expressed <i>yo</i> transporter system, mediate import/transport of arginine, lysine, ornithine and histidine. (PMID: 16159588). Located on the basolateral surface, mediates a bidirectional transport of histidine, arginine and lysine (PMID: 17046154). Basolateral membrane contains the structure but with irreversible force.                                                                                                                                                                                                                                                                                     | PMID: 14770102, PMID: 12505130, PMID: 17464854/PMID:18195886.                                                                                                                                                                                                                                                                                                                                                  | 1 | 4 |
| HSPATc    | transport of L-Histidine by <i>hPT1</i> or <i>hPT4</i> peptide transporters.                                                                     | $hs_{-}L(d) + H_2O \rightarrow hs_{-}L(c) + H_2O$                                   | 15186.1 or 13195.1              | (51261.1 or 12126.1)            | Solute carrier family 15 member 3 Solute carrier family 15 member 4                                        | Solute carrier family 15 member 3 Solute carrier family 15 member 4                                           | hPT1 (human peptide transporter 1) transports histidine and di-peptides from the basolateral membrane into the cytosol. Co-transporter protein, expressed in lung, thymus, spleen and kidney in brain, placenta, liver, adrenal gland and bone (PMID: 12505235). hPT4 expressed in brain, placenta and ovine. Transports carnosine and histidine in a proton symport mechanism. (PMID: 12505235)                                                                                                                                                                                                                                    | PMID: 16289527, PMID: 12505235, PMID: 17681807                                                                                                                                                                                                                                                                                                                                                                 | 0 | 4 |
| HSLLELATc | transport of L-Histidine into the cell and efflux of L-Phenylalanine out of the cell by LAT1 on the basolateral surface of kidney and intestine. | $hs_{-}L(c) + le_{-}L(c) \rightarrow hs_{-}L(c) + le_{-}L(d)$                       | (2391.1 and 17294.1)            | (23428.1 and 652.1)             | Large neutral amino acid transporter small subunit 2 4F2 cell-surface antigen/heavy chain                  | Large neutral amino acid transporter small subunit 2 and 4F2 cell-surface antigen/heavy chain                 | Higher affinity for small neutral amino acids than LAT1. Functions as an exchanger (transport system), at the basolateral surface of membranes in transporting cytosolic. Located in the proximal tubule of kidney, small intestine. Lower expression in liver, placenta and brain. Fluorescently labeled with CD-98 for trafficking of the complex to the membrane. (Pflugers Arch Eur J Physiol (2003) 446:503-512 DOI 10.1007/s004020030274, PMID: 12571675, J Am Soc Nephrol 14: 837-847, 2003, Pflugers Arch Eur J Physiol (2003) 445:529-533 DOI 10.1007/s004020030274, PMID: 14935986, Am J Physiol (2001) 281:C1077-C1081). | Pflugers Arch Eur J Physiol (2003) 446:503-512 DOI 10.1007/s004020030274, PMID: 12571675, J Am Soc Nephrol 14: 837-847, 2003, Pflugers Arch Eur J Physiol (2003) 445:529-533 DOI 10.1007/s004020030274, PMID: 14935986, Am J Physiol (2001) 281:C1077-C1081.                                                                                                                                                   | 0 | 4 |
| HSLATc    | transport of L-Histidine by LAT1 in association with 4F2c, across the apical surface of the membrane.                                            | $hs_{-}L(d) + le_{-}L(c) \rightarrow hs_{-}L(c) + le_{-}L(d)$                       | (2391.1 and 17294.1)            | (654.1 and 652.1)               | Large neutral amino acid transporter small subunit 1 4F2 cell-surface antigen/heavy chain                  | Large neutral amino acid transporter small subunit 1 and 4F2 cell-surface antigen/heavy chain                 | Isletin is the only amino acid tested for efflux. Expressed in many placenta, brain, spleen, testis, activated lymphocytes and some tumor cells. Functions as a symport transport system (DOI: 10.1093/cell/200/1/62). requires heterodimerization with phenylalanine CD98 (Pflugers Arch Eur J Physiol (2003) 446:503-512, DOI: 10.1007/s004020030274, PMID: 12571675).                                                                                                                                                                                                                                                            | Hans Gerhard Vogel, Franz J. Meck, Inchen Maas, Dieter Mayer (2006). Drug discovery and evaluation: Safety and pharmacokinetic assays, Springer publications, Chapter 10, page 49, table 3, PMID: 16952290, PMID: 12343422, European Journal of Pharmacology 441 (2002) 127-132, Am J Physiol Cell Physiol 285:C1077-C1081, 2003, Annals Acad (2002) 26: 129-203 DOI 10.1080/00036810208559214, PMID: 11932110 | 0 | 4 |
| HSPLELATc | transport of L-Histidine into the cell and efflux of L-Phenylalanine out of the cell by LAT1 on the basolateral surface of kidney and intestine. | $hs_{-}L(c) + phe_{-}L(c) \rightarrow hs_{-}L(c) + phe_{-}L(d)$                     | (2391.1 and 17294.1)            | (23428.1 and 652.1)             | Large neutral amino acid transporter small subunit 2 4F2 cell-surface antigen/heavy chain                  | Large neutral amino acid transporter small subunit 2 and 4F2 cell-surface antigen/heavy chain                 | Higher affinity for small neutral amino acids than LAT1. Functions as an exchanger (transport system), at the basolateral surface of membranes in transporting cytosolic. Located in the proximal tubule of kidney, small intestine. Lower expression in liver, placenta and brain. Fluorescently labeled with CD-98 for trafficking of the complex to the membrane. (Pflugers Arch Eur J Physiol (2003) 446:503-512 DOI 10.1007/s004020030274, PMID: 12571675).                                                                                                                                                                    | Pflugers Arch Eur J Physiol (2003) 446:503-512 DOI 10.1007/s004020030274, PMID: 12571675, J Am Soc Nephrol 14: 837-847, 2003, Pflugers Arch Eur J Physiol (2003) 445:529-533 DOI 10.1007/s004020030274, PMID: 14935986, Am J Physiol (2001) 281:C1077-C1081.                                                                                                                                                   | 0 | 4 |
| HSSNATc   | transport of L-Histidine into the cell coupled with co-transport with sodium and counter transport with protons by SNAT3 transporter.            | $hs_{-}L(d) + na(c) + H_2O \rightarrow hs_{-}L(c) + na(c) + H_2O$                   | 28677.1                         | (92746.1)                       | Sodium coupled neutral amino acid transporter 3                                                            | Sodium coupled neutral amino acid transporter 3                                                               | SNAT3 performs both symport with sodium and antiport with protons, for the net transport of neutral amino acid into the cell. Cellular localization varies from reported in stomach, brain, liver, lung, small intestine, spleen, colon and kidney. (PMID: 12645534)                                                                                                                                                                                                                                                                                                                                                                | PMID: 12645534, PMCID: PMC1485113, PMID:18195886                                                                                                                                                                                                                                                                                                                                                               | 1 | 4 |
| HSLATc    | transport of L-Histidine by <i>y-LAT1</i> or <i>y-LAT2</i> transporters in small intestine and kidney                                            | $hs_{-}L(d) + na(c) + arg_{-}L(c) \rightarrow hs_{-}L(c) + na(c) + arg_{-}L(d)$     | (284.1 or (43836.1 and 17294.1) | (956.1 or 957.1 and 652.1)      | Y-L-amine acid transporter 1 Y-L-amine acid transporter 2 4F2 cell-surface antigen/heavy chain             | Y-L-amine acid transporter 1 or Y-L-amine acid transporter 2 and 4F2 cell-surface antigen/heavy chain         | y-LAT1 and y-LAT2 transporters transport CD98 for heterodimerization to the plasma membrane. Acts as an amino acid exchanger, with influx of neutral amino acids and efflux of cationic amino acid, requires Na+ for optimal activity. Can also operate with H+ in absence of Na+ (PMID: 11566615).                                                                                                                                                                                                                                                                                                                                 | PMID: 11566615, PMID: 18195886                                                                                                                                                                                                                                                                                                                                                                                 | 0 | 4 |
| HSLATc    | transport of L-Histidine by <i>y-LAT1</i> or <i>y-LAT2</i> transporters in small intestine and kidney                                            | $hs_{-}L(d) + na(c) + arg_{-}L(c) \rightarrow hs_{-}L(c) + na(c) + arg_{-}L(d)$     | (284.1 or (43836.1 and 17294.1) | (956.1 or 957.1 and 652.1)      | Y-L-amine acid transporter 1 Y-L-amine acid transporter 2 4F2 cell-surface antigen/heavy chain             | Y-L-amine acid transporter 1 or Y-L-amine acid transporter 2 and 4F2 cell-surface antigen/heavy chain         | y-LAT1 and y-LAT2 transporters transport CD98 for heterodimerization to the plasma membrane. Acts as an amino acid exchanger, with influx of neutral amino acids and efflux of cationic amino acid, requires Na+ for optimal activity. Can also operate with H+ in absence of Na+ (PMID: 11566615).                                                                                                                                                                                                                                                                                                                                 | PMID: 11566615, PMID: 18195886                                                                                                                                                                                                                                                                                                                                                                                 | 0 | 4 |
| HPETABPc  | transport of 5-HPETE into the endosomes                                                                                                          | $2\text{-HPETE}(c) \rightleftharpoons 2\text{-HPETE}(d)$                            | 148.1                           | (2168.1)                        | Fatty acid-binding protein, liver                                                                          | Fatty acid-binding protein, liver                                                                             | crystal structure of LFAB revealed 2 binding sites (in contrast to BFAB which has 1). mechanism for the release (PMID: 9554495). LFAB is expressed in kidney, kidney, intestine, placenta, stomach and lung (PMID: 12671675). Once the fatty acid enters the E.R., the transporter into the E.R. to reconstitute mono-phospholipids (PMID: 10822299, PMID: 12587775).                                                                                                                                                                                                                                                               | PMID: 9555585, PMCID: PMC1821027, PMID: 9554495, PMID: 9382452, PMCID: PMC1875558, <a href="http://med3.library.utoronto.ca/Dr/TW9/volgen-HB_20136-RP-1.pdf">http://med3.library.utoronto.ca/Dr/TW9/volgen-HB_20136-RP-1.pdf</a>                                                                                                                                                                               | 1 | 4 |
| RLATRc    | transport of L-Histidine into the intestinal cells by ATB transporter                                                                            | $le_{-}L(c) + 2\text{-na}(c) + H_2O \rightarrow le_{-}L(c) + 2\text{-na}(c) + H_2O$ | 50754.1                         | (11284.1)                       | Sodium and chloride-dependent neutral and basic amino acid transporter B(c)                                | Sodium and chloride-dependent neutral and basic amino acid transporter B(c)                                   | ATB is both sodium and chloride coupled, with reaction stoichiometry 2Na+:1:1:1 histidine acid. The transporter is localized in the intestine, has a broad substrate specificity (both neutral and cationic amino acids), but is not involved in the transport of arginine, glutamine and proline (PMID: 16195886).                                                                                                                                                                                                                                                                                                                 | PMID:18195886                                                                                                                                                                                                                                                                                                                                                                                                  | 0 | 4 |
| REBATc    | transport of L-Histidine by the apical neutral amino acid transporter B(c)AT1 or B(c)AT2 in kidney, intestine or brain                           | $le_{-}L(c) + na(c) \rightarrow le_{-}L(c) + na(c)$                                 | (78.1 or (43836.1 and 9784.1)   | (5428.1 or (37953.1 or 91272.1) | Sodium-dependent neutral amino acid transporter B(c)AT1 Collectin or Argininosuccinate-converting enzyme 2 | Sodium-dependent neutral amino acid transporter B(c)AT1 or Collectin or Argininosuccinate-converting enzyme 2 | B(c)AT1 transports all the neutral amino acids with preference for methionine, leucine and threonine. Reaction stoichiometry is 1:1. Requires heterodimerization with collectin protein for increased affinity. Found in kidney and intestine, however also reported to be expressed in placenta. Reported expression in intestine but with controversy for expression in kidney. The localization of the B(c)AT2 transporter has been studied in brain tissue but data from the kidney have not been reported (PMID: 16195886).                                                                                                    | PMID: 19673176, PMID: 12684236, PMID: 18148851, PMID: 16181934, PMID: 18195886                                                                                                                                                                                                                                                                                                                                 | 0 | 4 |
| RLATc     | transport of L-Histidine by LAT1 in association with 4F2c, across the apical surface of the membrane.                                            | $le_{-}L(c) + le_{-}L(c) \rightarrow le_{-}L(c) + le_{-}L(d)$                       | (2391.1 and 17294.1)            | (654.1 and 652.1)               | Large neutral amino acid transporter small subunit 1 4F2 cell-surface antigen/heavy chain                  | Large neutral amino acid transporter small subunit 1 and 4F2 cell-surface antigen/heavy chain                 | Isletin is the only amino acid tested for efflux. Expressed in many placenta, brain, spleen, testis, activated lymphocytes and some tumor cells. Functions as a symport transport system (DOI: 10.1093/cell/200/1/62). requires heterodimerization with phenylalanine CD98 (Pflugers Arch Eur J Physiol (2003) 446:503-512, DOI: 10.1007/s004020030274, PMID: 12571675).                                                                                                                                                                                                                                                            | Hans Gerhard Vogel, Franz J. Meck, Inchen Maas, Dieter Mayer (2006). Drug discovery and evaluation: Safety and pharmacokinetic assays, Springer publications, Chapter 10, page 49, table 3, PMID: 16952290, PMID: 12343422, European Journal of Pharmacology 441 (2002) 127-132, Am J Physiol Cell Physiol 285:C1077-C1081, 2003, Annals Acad (2002) 26: 129-203 DOI 10.1080/00036810208559214, PMID: 11932110 | 0 | 4 |

|            |                                                                                                                                                               |                                                                             |                                  |                                   |                                                                                                       |           |                                                                                                                                                                                                                                                                                                                                                                                                                                             |                                                                                                                                                                                                                                                                                                                                                                                                                                                                                                                                          |                                                                           |   |   |
|------------|---------------------------------------------------------------------------------------------------------------------------------------------------------------|-----------------------------------------------------------------------------|----------------------------------|-----------------------------------|-------------------------------------------------------------------------------------------------------|-----------|---------------------------------------------------------------------------------------------------------------------------------------------------------------------------------------------------------------------------------------------------------------------------------------------------------------------------------------------------------------------------------------------------------------------------------------------|------------------------------------------------------------------------------------------------------------------------------------------------------------------------------------------------------------------------------------------------------------------------------------------------------------------------------------------------------------------------------------------------------------------------------------------------------------------------------------------------------------------------------------------|---------------------------------------------------------------------------|---|---|
| LEPHPELATn | transport of L-histidine into the cell and efflux of L-phenylalanine out of the cell by LAT2 on the basolateral surface of kidney and intestine.              | $bc_1L_1d + phe_1L_1c \rightleftharpoons bc_1L_1c + phe_1L_1d$              | (2393.1 and 17294.1)             | (23428.1 and 652.1)               | Large neutral amino-acid transporter small subunit 2 and 407 cell-surface antigen/heavy chain         |           | Higher affinity for small neutral amino acids than LAT1. function as an exchanger (transport system, at the basolateral surface of mitochondria in transporting cytochrome. Located in the proximal tubule of kidney, small intestine. Lower expression in ivary) placenta and brain.<br>Hemodistillation with CS-9K for studying of the complex to the membrane. (Phlegens Arch-Rur J Physiol (2000) 440:503-512 DOI 10.1007/s00400000274) | Phlegens Arch-Rur J Physiol (2000) 440:503-512 DOI 10.1007/s00400000274, PMID: 10576070, J Am Soc Nephrol 14: 837-847, 200, Phlegens Arch-Rur J Physiol (2000) 440:529-531 DOI 10.1007/s00400-000-0071-4, PMID: 18193088, Am J Physiol (2001) 281:C1077-C1081.                                                                                                                                                                                                                                                                           | 0                                                                         | 4 |   |
| LEUAT0n    | transport of L-leucine into the intestinal cells by ATB0 transporter                                                                                          | $leu_1L_1d + 2 na_1[a] + c_1[a] \rightarrow leu_1L_1c + 2 na_1[c] + c_1[c]$ | 56794.1                          | (11284.1)                         | Sodium and chloride-dependent neutral and basic amino-acid transporter Bc(-)                          |           | ATB0 is both sodium and chloride coupled, with reaction stoichiometry 2Na+:1Lc Luminic acid. The transporter is localized in the intestine, has a broad substrate specificity (both neutral and cationic amino acids), but is not involved in the transport of arginine, glutamine and proline. (PMID:10105086).                                                                                                                            | PMID:18193088                                                                                                                                                                                                                                                                                                                                                                                                                                                                                                                            | 0                                                                         | 4 |   |
| LEUBATn    | transport of L-leucine by the apical neutral amino acid transporter B0LAT1 or B0LAT2 in kidney, intestine or brain                                            | $leu_1L_1d + na_1[a] \rightarrow leu_1L_1c + na_1[a]$                       | (78.1 or (14338.1 and 57384.1))  | (5428.1 and (57393.1 or 93272.1)) | Sodium-dependent neutral amino-acid transporter B0LAT1<br>Collects Argininos-converting enzyme 2      | 3.4.17.23 | Asparticase-converting enzyme 2                                                                                                                                                                                                                                                                                                                                                                                                             | transports all the neutral amino acids with preference for methionine, leucine and valine. Reaction stoichiometry is 1:1. Requires hemodistillation with collection protein for increased affinity. Found in kidney and intestine, however also reported to be expressed in skin. Requires association with AC12 for expression in intestine but with differences for expression in kidney. The localization of the B0LAT2 transporter has been studied in brain tissue but data from the kidney have not been reported (PMID:18193088). | PMID:19472175, PMID:13804238, PMID:18400052, PMID:18181394, PMID:18193088 | 0 | 4 |
| LEUCATn    | hydrolysis of leucylphenylalanine                                                                                                                             | $leu[a] + leu[b]c \rightarrow leu_1L_1c + phe_1L_1c$                        |                                  |                                   |                                                                                                       |           | most probable reaction                                                                                                                                                                                                                                                                                                                                                                                                                      | 0                                                                                                                                                                                                                                                                                                                                                                                                                                                                                                                                        | 1                                                                         | 1 |   |
| LEUCPEPTn  | transport of Leucylphenylalanine by the apical PEPT1 amino acid transporter across the brush border cells of the enterocytes of the intestine and renal cells | $leu[a]d + leu[b]c \rightarrow leu_1L_1c + leu_1L_1c$                       | 215338.1                         | (6564.1)                          | Solute carrier family 15 member 1                                                                     |           | PEPT1 appears to transport all di- and tri-peptides across the brush border of the intestinal cells (Shenoy S, Groppe, Jack L, Smith, James L, Groll (2009) Advanced nutrition and human metabolism, Wileysworth copyright learning, 5th edition, page 101). PEPT1 is expressed highly in intestinal cells where as PEPT2 is localized to renal cells (PMID:1033047).                                                                       | PMID:7808848, PMID:14960252, PMID:14977407, PMID:10330407                                                                                                                                                                                                                                                                                                                                                                                                                                                                                | 0                                                                         | 4 |   |
| LEUHELATn  | transport of L-leucine into the cell and efflux of L-histidine out of the cell by LAT2 on the basolateral surface of kidney and intestine                     | $leu_1L_1d + bc_1L_1c \rightleftharpoons leu_1L_1c + bc_1L_1d$              | (2393.1 and 17294.1)             | (23428.1 and 652.1)               | Large neutral amino-acid transporter small subunit 2 and 407 cell-surface antigen/heavy chain         |           | Higher affinity for small neutral amino acids than LAT1. function as an exchanger (transport system, at the basolateral surface of mitochondria in transporting cytochrome. Located in the proximal tubule of kidney, small intestine. Lower expression in ivary) placenta and brain.<br>Hemodistillation with CS-9K for studying of the complex to the membrane. (Phlegens Arch-Rur J Physiol (2000) 440:503-512 DOI 10.1007/s00400000274) | Phlegens Arch-Rur J Physiol (2000) 440:503-512 DOI 10.1007/s00400000274, PMID: 10576070, J Am Soc Nephrol 14: 837-847, 200, Phlegens Arch-Rur J Physiol (2000) 440:529-531 DOI 10.1007/s00400-000-0071-4, PMID: 18193088, Am J Physiol (2001) 281:C1077-C1081.                                                                                                                                                                                                                                                                           | 1                                                                         | 4 |   |
| LEULELAPn  | hydrolysis of Leucylphenylalanine in the small intestine for cellular uptake                                                                                  | $leu[a]d + leu[b]c \rightleftharpoons leu_1L_1c + leu_1L_1c$                | 46988.1                          | (5156.1)                          | leucyl aminopeptidase                                                                                 | 3.4.11.1  | leucyl aminopeptidase                                                                                                                                                                                                                                                                                                                                                                                                                       | leu[a]d[E.C. 3.4.11.1] and leucine (3.4.11.1) amino-peptidase have similar amino acid sequence and catalytic properties (PMID:1780230).                                                                                                                                                                                                                                                                                                                                                                                                  | PMID:15052138, PMID:1831152                                               | 1 | 4 |
| LEULEPEPTn | transport of Leucylphenylalanine by the apical PEPT1 amino acid transporter across the brush border cells of the enterocytes of the intestine and renal cells | $leu[a]d + leu[b]c \rightarrow leu_1L_1c + leu_1L_1c$                       | 215338.1                         | (6564.1)                          | Solute carrier family 15 member 1                                                                     |           | PEPT1 appears to transport all di- and tri-peptides across the brush border of the intestinal cells (Shenoy S, Groppe, Jack L, Smith, James L, Groll (2009) Advanced nutrition and human metabolism, Wileysworth copyright learning, 5th edition, page 101). PEPT1 is expressed highly in intestinal cells where as PEPT2 is localized to renal cells (PMID:1033047).                                                                       | PMID:7808848, PMID:14960252, PMID:14977407, PMID:10330407                                                                                                                                                                                                                                                                                                                                                                                                                                                                                | 0                                                                         | 4 |   |
| LEUPELATn  | transport of L-leucine into the cell and efflux of L-phenylalanine out of the cell by LAT2 on the basolateral surface of kidney and intestine.                | $leu_1L_1d + phe_1L_1c \rightleftharpoons leu_1L_1c + phe_1L_1d$            | (2393.1 and 17294.1)             | (23428.1 and 652.1)               | Large neutral amino-acid transporter small subunit 2 and 407 cell-surface antigen/heavy chain         |           | Higher affinity for small neutral amino acids than LAT1. function as an exchanger (transport system, at the basolateral surface of mitochondria in transporting cytochrome. Located in the proximal tubule of kidney, small intestine. Lower expression in ivary) placenta and brain.<br>Hemodistillation with CS-9K for studying of the complex to the membrane. (Phlegens Arch-Rur J Physiol (2000) 440:503-512 DOI 10.1007/s00400000274) | Phlegens Arch-Rur J Physiol (2000) 440:503-512 DOI 10.1007/s00400000274, PMID: 10576070, J Am Soc Nephrol 14: 837-847, 200, Phlegens Arch-Rur J Physiol (2000) 440:529-531 DOI 10.1007/s00400-000-0071-4, PMID: 18193088, Am J Physiol (2001) 281:C1077-C1081.                                                                                                                                                                                                                                                                           | 1                                                                         | 4 |   |
| LEUPELATn  | transport of leucine by y-LAT1 or y-LAT2 with co-transporter of its small intestine and kidney                                                                | $leu_1L_1d + le_1c \rightarrow arg_1L_1c + le_1c + arg_1L_1c$               | (284.1 or (33808.1 and 17294.1)) | (956.1 or 957.1 and 652.1)        | Y-L amino-acid transporter 1<br>Y-L amino-acid transporter 2 and 407 cell-surface antigen/heavy chain |           | y-LAT1 and y-LAT2 transporters requires CD98 for upregulation to the plasma membrane. Act as an amino acid exchanger, with influx of neutral amino acids and efflux of cationic amino acid, requires Na+ for optimal activity. Can also operate with 10:1 stoichiometry of Na+ (PMID:11546045).                                                                                                                                             | PMID:12546641, PMID:18193088                                                                                                                                                                                                                                                                                                                                                                                                                                                                                                             | 0                                                                         | 4 |   |

[illegible]

|             |                                                                                                                                                                  |                                                               |                                 |                              |                                                                                                  |        |                                                                                                       |  |                                                                                                                                                                                                                                                                                                                                                                                                                                                                                                                              |                                                                                                                                                                                                                                                                  |   |   |
|-------------|------------------------------------------------------------------------------------------------------------------------------------------------------------------|---------------------------------------------------------------|---------------------------------|------------------------------|--------------------------------------------------------------------------------------------------|--------|-------------------------------------------------------------------------------------------------------|--|------------------------------------------------------------------------------------------------------------------------------------------------------------------------------------------------------------------------------------------------------------------------------------------------------------------------------------------------------------------------------------------------------------------------------------------------------------------------------------------------------------------------------|------------------------------------------------------------------------------------------------------------------------------------------------------------------------------------------------------------------------------------------------------------------|---|---|
| MEYLA7b     | transport of Methionine by y-LATI or y-LAT2 with co-transporter of 3 small intestine and kidney                                                                  | $met\_h[4] + h[4] + arg\_h[4] > met\_h[4] + h[4] + arg\_h[4]$ | (284.1 or (3306.1 and 17284.1)) | (956.1 or 957.1 and (882.1)) | Y-L-amine acid transporter 1<br>Y-L-amine acid transporter 2<br>497 cells<br>antigen heavy chain |        | Y-L-amine acid transporter 1 or Y-L-amine acid transporter 2 and 497 cell surface antigen heavy chain |  | y-LATI and y-LAT2 transporter requires CD98 for translocation to the plasma membrane. Acts as an amino acid exchanger, with influx of neutral amino acids and efflux of cationic amino acid, requires Na+ for optimal activity. Can also operate with H+ in absence of Na+ (PMID: 11566615).                                                                                                                                                                                                                                 | PMID: 17546641, PMID: 18193088                                                                                                                                                                                                                                   | 0 | 4 |
| MTBPTc      | transport of TBP into the perial blood                                                                                                                           | $5mb[4] < 5mb[4]$                                             |                                 |                              |                                                                                                  |        |                                                                                                       |  | 5-methylfolate is found in the perial circulation, as the reaction was added as folate exit from the enterocyte. The transporter is a carrier protein-mediated, Na+-independent and electro-neutral.                                                                                                                                                                                                                                                                                                                         | James S. Groggier, Jack S. Smith, James L. Groll (2009) Advanced nutrition and human metabolism, Wadsworth cengage learning, 5th edition, page 350, 5.F.M. Ball (2008) illustrates their role in the human body, Blackwell publishing, chapter 17, page 211-254. | 0 | 2 |
| NACDa       | release of nicotinate at the basolateral surface                                                                                                                 | $nic[4] > nic[4]$                                             |                                 |                              |                                                                                                  |        |                                                                                                       |  | diffusion process. Hypothetically created. Nothing much is known about acute exit from the enterocyte.                                                                                                                                                                                                                                                                                                                                                                                                                       | PMID: 21749321                                                                                                                                                                                                                                                   | 0 | 1 |
| NACHORCTL3a | absorption of nicotinate at the brush border of enterocyte                                                                                                       | $nic[4] + h[4] < nic[4] + h[4]$                               | 1287.1                          | (939.1)                      | Solute carrier family 22 member 13                                                               |        |                                                                                                       |  | nicotinate is essential for life organisms, needs to be re-absorbed. Can be either chlorotransferase, from tryptophan or breakdown of proteins. Low pH is required for an efficient uptake. The cytoplasm transporter is highly operative in PCV cell kidneys. Some authors have also suggested involvement of RBCAM in nicotinic uptake when it is administered at high physiological doses (PMID: 21749321).                                                                                                               | PMID: 18411304, PMID: 15728713                                                                                                                                                                                                                                   | 0 | 2 |
| NCAMEn      | release of nicotinate at the basolateral surface                                                                                                                 | $nic[4] < nic[4]$                                             |                                 |                              |                                                                                                  |        |                                                                                                       |  | diffusion process. Hypothetically created. Nothing much is known about acute exit from the enterocyte.                                                                                                                                                                                                                                                                                                                                                                                                                       | PMID: 21749321                                                                                                                                                                                                                                                   | 0 | 1 |
| OCFAAFAP7a  | transport of acylcarnitine/ carn into the enterocyte                                                                                                             | $2 carn[4] < 2 carn[4]$                                       | 148.1                           | (2148.1)                     | Fatty acid-binding protein, liver                                                                |        | Fatty acid-binding protein, liver                                                                     |  | crystal structure of LFAB revealed 2 binding sites (in contrast to IFAB which has 1) (necessary) for oleate (PMID: 19544970). LFAB is expressed in liver, kidney, intestine, pancreas, stomach and lung (PMID: PMC2675063). Once the long chain fatty acids enter the enterocyte, they lead to the FAAP assembly, for transport into the E.R. to aceto carnitine triacylglycerols (PMID: 20522896, PMID: 19280779).                                                                                                          | PMID: 9555861, PMCID: PMC2621027, PMID: 9054403, PMID: 9882452, PMCID: PMC2376938, <a href="http://med3.libraries.oxford.edu/doi/10.1093/pcp/1.1.pdf">http://med3.libraries.oxford.edu/doi/10.1093/pcp/1.1.pdf</a>                                               | 1 | 4 |
| OLEFA7ATPc  | uptake of acylcarnitine by the enterocyte                                                                                                                        | $olec[4] + ap[4] + carn[4] > olec[4] + ap[4] + carn[4]$       | 26869.1                         | (1999.1)                     | Long-chain fatty acid transporter protein 4                                                      | 6.2.1. | Long-chain fatty acid transporter protein 4                                                           |  | major intestinal fatty acid transporter protein, may also act in co-ordination with co-L carnitine. The transporter is ATP driven, further the transporter itself is fatty acid-activating enzyme: propionates (PMID: 12861836).                                                                                                                                                                                                                                                                                             | PMID: 10518211, PMID: 20880808, PMID: 12865581, Iversen, Ender, & Metab. Agents in Med. Chem., 2009, 5, 11-17.                                                                                                                                                   | 0 | 4 |
| ORNAALa7ATc | transport of L-Glutamine into the cell in exchange for L-Alanine by Na+-AT transporter at the apical surface of the membrane of small intestine and renal cells. | $orn[4] + ala\_h[4] < orn[4] + ala\_h[4]$                     | (3962.1 and 2552.1)             | (11136.1 and 6519.1)         | Na+-type amino acid transporter 1<br>Neutral and basic amino acid transporter protein 1BAT       |        | Na+-type amino acid transporter 1 and Neutral and basic amino acid transporter protein 1BAT           |  | sodium-independent antiporter transport system, exchanges 4 basic amino acids into the cells and neutral amino acids out of the cell. Located on the apical surface of transporting epithelia. Cellular localization being small intestine, kidney (proximal tubule), lung, placenta, brain and kidney. Regulates the heterodimerization with BAT glycoprotein. (PMID: 10958134).                                                                                                                                            | PMID: 10958134, PMID: 15348071, PMID: 18195088, PMID: 11546643                                                                                                                                                                                                   | 0 | 4 |
| ORNAELa7ATc | transport of L-Glutamine into the cell in exchange for L-Alanine by Na+-AT transporter at the apical surface of the membrane of small intestine and renal cells. | $orn[4] + ala\_h[4] < orn[4] + ala\_h[4]$                     | (3962.1 and 2552.1)             | (11136.1 and 6519.1)         | Na+-type amino acid transporter 1<br>Neutral and basic amino acid transporter protein 1BAT       |        | Na+-type amino acid transporter 1 and Neutral and basic amino acid transporter protein 1BAT           |  | sodium-independent antiporter transport system, exchanges 4 basic amino acids into the cells and neutral amino acids out of the cell. Located on the apical surface of transporting epithelia. Cellular localization being small intestine, kidney (proximal tubule), lung, placenta, brain and kidney. Regulates the heterodimerization with BAT glycoprotein. (PMID: 10958134).                                                                                                                                            | PMID: 10958134, PMID: 15348071, PMID: 18195088, PMID: 11546643                                                                                                                                                                                                   | 0 | 4 |
| ORNa        | transport of ornithine by y- transporter                                                                                                                         | $orn[4] < orn[4]$                                             | 11987.1                         | (6541.1)                     | High-affinity cationic amino acid transporter 1                                                  |        | High-affinity cationic amino acid transporter 1                                                       |  | dispositively regulated y- transporter system, mediates transport of arginine, lysine, ornithine and histidine. (PMID: 15155588). Located on the basolateral surface, mediates a bidirectional transport of cationic amino acid and is Na+-independent (PMID: 17494614). Racoon 1 contains this mutation but with reversible form.                                                                                                                                                                                           | PMID: 14770310, PMID: 12506130, PMID: 17494614, PMID: 18195088.                                                                                                                                                                                                  | 1 | 4 |
| PALEFA7ATPc | uptake of 3-hydroxybutyrate by the enterocyte                                                                                                                    | $3hb[4] + ap[4] + carn[4] > 3hb[4] + ap[4] + carn[4]$         | 26869.1                         | (1999.1)                     | Long-chain fatty acid transporter protein 4                                                      | 6.2.1. | Long-chain fatty acid transporter protein 4                                                           |  | major intestinal fatty acid transporter protein, may also act in co-ordination with co-L carnitine. The transporter is ATP driven, further the transporter itself is fatty acid-activating enzyme: propionates (PMID: 12861836).                                                                                                                                                                                                                                                                                             | PMID: 10518211, PMID: 20880808, PMID: 12865581, Iversen, Ender, & Metab. Agents in Med. Chem., 2009, 5, 11-17.                                                                                                                                                   | 0 | 4 |
| PCBHLJSTDa  | Transport, extracellular                                                                                                                                         | $pcb[4]_b[4] < pcb[4]_b[4]$                                   |                                 |                              |                                                                                                  |        |                                                                                                       |  | transported in chylomicron into lymph                                                                                                                                                                                                                                                                                                                                                                                                                                                                                        | James S. Groggier, Jack S. Smith, James L. Groll (2009) Wadsworth cengage learning, Advanced nutrition and human metabolism, 5th edition, page 142-148.                                                                                                          | 0 | 2 |
| PCDCHa      | binding of pectin with deoxycholic acid in the intestinal lumen, reducing serum cholesterol levels.                                                              | $pec[4] + dech[4] + h[4] < pec[4]_b[4]$                       |                                 |                              |                                                                                                  |        |                                                                                                       |  | pectin binds bile acid and leads to enhanced excretion, then by the 3- alpha hydroxylase pathway is activated leading to increased cholesterol catabolism for synthesis of more bile acids (regulates cholesterol metabolism). However the decreased serum-cholesterol levels are brought about by many other compensative effects (lower neutral action of dietary fibres, glycemic index etc) (PMID: 18320968, Gnanapavan P, Gladys ME. (2010) Food & Function 1: 149-55). pectin also binds more efficiently cholic acid. | PMID: 18925468, PMID: 12517466, PMID: 9808447, 7.Pandolf and F.M. Clydesdale (1992) Journal of food science, vol.57, no.3, 1242-1245.                                                                                                                            | 0 | 3 |
| PCDCHLa     | binding of pectin with glycocholate in the intestinal lumen, reducing serum cholesterol levels.                                                                  | $pec[4] + gch[4] + h[4] < pec[4]_b[4]$                        |                                 |                              |                                                                                                  |        |                                                                                                       |  | pectin binds bile acid and leads to enhanced excretion, then by the 3- alpha hydroxylase pathway is activated leading to increased cholesterol catabolism for synthesis of more bile acids (regulates cholesterol metabolism). However the decreased serum-cholesterol levels are brought about by many other compensative effects (lower neutral action of dietary fibres, glycemic index etc) (PMID: 18320968, Gnanapavan P, Gladys ME. (2010) Food & Function 1: 149-55). pectin also binds more efficiently cholic acid. | PMID: 18925468, PMID: 12517466, PMID: 9808447, 7.Pandolf and F.M. Clydesdale (1992) Journal of food science, vol.57, no.3, 1242-1245.                                                                                                                            | 0 | 3 |
| PECTCHLa    | binding of pectin with taurocholate in the intestinal lumen, reducing serum cholesterol levels.                                                                  | $pec[4] + tch[4] + h[4] < pec[4]_b[4]$                        |                                 |                              |                                                                                                  |        |                                                                                                       |  | pectin binds bile acid and leads to enhanced excretion, then by the 3- alpha hydroxylase pathway is activated leading to increased cholesterol catabolism for synthesis of more bile acids (regulates cholesterol metabolism). However the decreased serum-cholesterol levels are brought about by many other compensative effects (lower neutral action of dietary fibres, glycemic index etc) (PMID: 18320968, Gnanapavan P, Gladys ME. (2010) Food & Function 1: 149-55). pectin also binds more efficiently cholic acid. | PMID: 18925468, PMID: 12517466, PMID: 9808447, 7.Pandolf and F.M. Clydesdale (1992) Journal of food science, vol.57, no.3, 1242-1245.                                                                                                                            | 0 | 3 |
| PF2HFA7ATPc | transport of 1-phosphatidylcholine into the enterocyte                                                                                                           | $2 pc\_h[4] < 2 pc\_h[4]$                                     | 148.1                           | (2148.1)                     | Fatty acid-binding protein, liver                                                                |        | Fatty acid-binding protein, liver                                                                     |  | crystal structure of LFAB revealed 2 binding sites (in contrast to IFAB which has 1) (necessary) for oleate (PMID: 19544970). LFAB is expressed in liver, kidney, intestine, pancreas, stomach and lung (PMID: PMC2675063). Once the long chain fatty acids enter the enterocyte, they lead to the FAAP assembly, for transport into the E.R. to aceto carnitine triacylglycerols (PMID: 20522896, PMID: 19280779).                                                                                                          | PMID: 9555861, PMCID: PMC2621027, PMID: 9054403, PMID: 9882452, PMCID: PMC2376938, <a href="http://med3.libraries.oxford.edu/doi/10.1093/pcp/1.1.pdf">http://med3.libraries.oxford.edu/doi/10.1093/pcp/1.1.pdf</a>                                               | 1 | 4 |

|             |                                                                                                                                                    |                                                                                   |                                  |                                   |                                                                                                        |                                                                                                        |           |                                                                                                                                                                                                                                                                                                                                                                                                                                                                                                                                                                      |                                                                                                                                                                                                                                                                   |   |   |
|-------------|----------------------------------------------------------------------------------------------------------------------------------------------------|-----------------------------------------------------------------------------------|----------------------------------|-----------------------------------|--------------------------------------------------------------------------------------------------------|--------------------------------------------------------------------------------------------------------|-----------|----------------------------------------------------------------------------------------------------------------------------------------------------------------------------------------------------------------------------------------------------------------------------------------------------------------------------------------------------------------------------------------------------------------------------------------------------------------------------------------------------------------------------------------------------------------------|-------------------------------------------------------------------------------------------------------------------------------------------------------------------------------------------------------------------------------------------------------------------|---|---|
| PIE1ATNc    | transport of L-Phenylalanine into the interstitial cells by ATRB transporter                                                                       | $phs\_1[4] + 2\ m[4] + \text{c}[4] \rightarrow phs\_1[4] + 2\ m[4] + \text{c}[4]$ | 9674.1                           | (11284.1)                         | Sodium and chloride-dependent neutral and basic amino acid transporter (Bc.)                           | Sodium and chloride-dependent neutral and basic amino acid transporter (Bc.)                           |           | ATRB is both sodium and chloride coupled, with sodium stoichiometry 2:phs-1:1:1:1:1. The transporter is localized in the intestine, has a broad substrate specificity (both neutral and cationic amino acids), but is not involved in the transport of arginine, glutamine and proline (PMID:18195986).                                                                                                                                                                                                                                                              | PMID:18195988                                                                                                                                                                                                                                                     | 0 | 4 |
| PIE1B1ATc   | transport of L-Phenylalanine by the apical neutral amino acid transporter in kidney and intestine                                                  | $phs\_1[4] + m[4] \rightarrow phs\_1[4] + m[4]$                                   | (78.1 or (44388.1 and 57394.1))  | (5424.1 and (57393.1 or 59272.1)) | Sodium-dependent neutral amino acid transporter Bc(AT) Collectin Argininosuccinate-converting enzyme 2 | Sodium-dependent neutral amino acid transporter Bc(AT) Collectin Argininosuccinate-converting enzyme 2 | 3.4.17.23 | transport all the neutral amino acids with preference for methionine, threonine and valine. Regulates endocytosis in L1. Regulates homeostasis with collective protein for increased affinity. Found in kidney and intestine, however also reported to be expressed in skin. Regulates association with AC22 for expression in intestine but with collectin for expression in kidney.                                                                                                                                                                                | PMID:19472175, PMID:15854236, PMID:18408092                                                                                                                                                                                                                       | 0 | 4 |
| PIE1ELATNc  | transport of L-Phenylalanine into the cell and efflux of L-homocysteine out of the cell by LAT2 on the basolateral surface of kidney and intestine | $phs\_1[4] + 4e\_1[4] \rightarrow phs\_1[4] + 4e\_1[4]$                           | (2599.1 and 17294.1)             | (23428.1 and 652.1)               | Large neutral amino acid transporter small subunit 2 4F2 cell-surface antigen/heavy chain              | Large neutral amino acid transporter small subunit 2 and 4F2 cell-surface antigen/heavy chain          |           | Higher affinity for small neutral amino acids than LAT1. Functions as an exchanger (coupled transport) at the basolateral surface of membranes in transporting epithelia. Localized in the proximal tubule of kidney, small intestine. Lower expression in testis, placenta and brain. Homodimerization with CD36 for trafficking of the complex to the membrane. (Pflieger Arch Biochem Biophys (2003) 446:503-511; IJKB 10.1007/s004400002746). LAT2 carries both influx and efflux of phenylalanine, leucine and isoleucine, hence such reactions are reversible. | Pflieger Arch Biochem Biophys (2003) 446:503-511; IJKB 10.1007/s004400002746, PMID:12574070, J Am Soc Nephrol 14: 887-891, 2003, Pflieger Arch Biochem Biophys (2003) 446:529-533; IJKB 10.1007/s004400002746 > PMID:18195986, Am J Physiol (2001) 282:C377-C389. | 1 | 4 |
| PIE1ELATNc  | transport of L-Phenylalanine by LAT1 in association with CD36, across the apical surface of the membrane                                           | $phs\_1[4] + 4e\_1[4] \rightarrow phs\_1[4] + 4e\_1[4]$                           | (2599.1 and 17294.1)             | (654.1 and 652.1)                 | Large neutral amino acid transporter small subunit 1 4F2 cell-surface antigen/heavy chain              | Large neutral amino acid transporter small subunit 1 and 4F2 cell-surface antigen/heavy chain          |           | function is the only system acid used for efflux. Expressed in many placenta, brain, spleen, ovary, activated lymphocytes and some tumor cells. Functions as a symporter (coupled transport). CD36 (IJKB 10.1007/s004400002746) requires homodimerization with phenylalanine CD36 (Pflieger Arch Biochem Biophys (2003) 446:503-511; IJKB 10.1007/s004400002746, PMID:10908330).                                                                                                                                                                                     | Pflieger Arch Biochem Biophys (2003) 446:503-511; IJKB 10.1007/s004400002746, PMID:12574070, J Am Soc Nephrol 14: 887-891, 2003, Pflieger Arch Biochem Biophys (2003) 446:529-533; IJKB 10.1007/s004400002746 > PMID:18195986, Am J Physiol (2001) 282:C377-C389. | 0 | 4 |
| PIE1ELATNc  | transport of phenylalanine by LAT1 in intestinal cells                                                                                             | $phs\_1[4] \rightarrow phs\_1[4]$                                                 | 7241.1                           | (851.1)                           | Large neutral amino acid transporter small subunit 3                                                   | Large neutral amino acid transporter small subunit 3                                                   |           | LAT1 transports neutral amino acids and is Na+ independent. The transport mechanism is facilitated diffusion (PMID:12703836). The substrate specificity is for leucine, isoleucine, methionine and phenylalanine (PMID:18195986).                                                                                                                                                                                                                                                                                                                                    | PMID:18195986, PMID:12703836, PMID:18195988                                                                                                                                                                                                                       | 1 | 4 |
| PIE1ELATNc  | transport of L-Phenylalanine by y-LAT1 or y-LAT2 transporter in small intestine and kidney                                                         | $phs\_1[4] + m[4] + arg\_1[4] \rightarrow phs\_1[4] + m[4] + arg\_1[4]$           | (254.1 or (53836.1 and 17294.1)) | (596.1 or 957.1) and (652.1)      | Y-L-amine acid transporter 1 Y-L-amine acid transporter 2 4F2 cell-surface antigen/heavy chain         | Y-L-amine acid transporter 1 or Y-L-amine acid transporter 2 and 4F2 cell-surface antigen/heavy chain  |           | y-LAT1 and y-LAT2 transporters requires CD98 for upregulation to the plasma membrane. Acts as an amino acid exchanger, with influx of neutral amino acids and efflux of cationic amino acid, requires Na+ for optimal activity. Can also operate with H+ in absence of Na+ (PMID:11566615).                                                                                                                                                                                                                                                                          | PMID:12546641, PMID:18195988                                                                                                                                                                                                                                      | 0 | 4 |
| PIE1ELATNc  | transport of Phenylalanine by y-LAT1 or y-LAT2 transporter in small intestine and kidney                                                           | $phs\_1[4] + m[4] + arg\_1[4] \rightarrow phs\_1[4] + m[4] + arg\_1[4]$           | (254.1 or (53836.1 and 17294.1)) | (596.1 or 957.1) and (652.1)      | Y-L-amine acid transporter 1 Y-L-amine acid transporter 2 4F2 cell-surface antigen/heavy chain         | Y-L-amine acid transporter 1 or Y-L-amine acid transporter 2 and 4F2 cell-surface antigen/heavy chain  |           | y-LAT1 and y-LAT2 transporters requires CD98 for upregulation to the plasma membrane. Acts as an amino acid exchanger, with influx of neutral amino acids and efflux of cationic amino acid, requires Na+ for optimal activity. Can also operate with H+ in absence of Na+ (PMID:11566615).                                                                                                                                                                                                                                                                          | PMID:12546641, PMID:18195988                                                                                                                                                                                                                                      | 0 | 4 |
| PIE1COMAFNc | transport of palmitoyl coA into the enterocytes                                                                                                    | $2\ p[4] + c[4] \rightarrow 2\ p[4] + c[4]$                                       | 148.1                            | (2168.1)                          | Fatty acid-binding protein, liver                                                                      | Fatty acid-binding protein, liver                                                                      |           | crystal structure of LFAB revealed 2 binding sites (in contrast to BFAB which has 1) (acknowledged for others (PMID:1054495). LFAB is expressed in liver, kidney, intestine, pancreas, ovum and lung (PMID:12574070). Once the long chain fatty acids enter the enterocytes, they are the B.E. to be converted to acylglycerols (PMID:12522498, PMID:12522498, PMID:12522498).                                                                                                                                                                                       | PMID:10550051, PMID:12522498, PMID:1054495, PMID:1054495, PMID:1054495, http://med3.library.utoronto.ca/7047/vol9no10_2018.pdf                                                                                                                                    | 1 | 4 |
| PIE1COMAFNc | release of pyruvate across the basolateral membrane                                                                                                | $p[4] + c[4] \rightarrow p[4] + c[4]$                                             |                                  |                                   |                                                                                                        |                                                                                                        |           | not much is known about the pyruvate acid exit across the basolateral membrane. Different reactions in hepatocytes. However, uptake of pyruvate by B.E. takes place by simple diffusion (J.F.A. Biol. Chem. (2003) 278:10000-10000). In the human body, Blackwell publishing, chapter 15, page 125.                                                                                                                                                                                                                                                                  | PMID:12574070                                                                                                                                                                                                                                                     | 0 | 1 |
| PIE1B1ATNc  | transport of L-Proline by the apical neutral amino acid transporter Bc(AT) or Bc(AT)2 in kidney, intestine or brain                                | $pro\_1[4] + m[4] \rightarrow pro\_1[4] + m[4]$                                   | (78.1 or (44388.1 and 57394.1))  | (5424.1 and (57393.1 or 59272.1)) | Sodium-dependent neutral amino acid transporter Bc(AT) Collectin Argininosuccinate-converting enzyme 2 | Sodium-dependent neutral amino acid transporter Bc(AT) Collectin Argininosuccinate-converting enzyme 2 | 3.4.17.23 | Bc(AT) transports all the neutral amino acids with preference for methionine, threonine and valine. Regulates endocytosis in L1. Regulates homeostasis with collective protein for increased affinity. Found in kidney and intestine, however also reported to be expressed in skin. Regulates association with AC22 for expression in intestine but with collectin for expression in kidney. The localization of the Bc(AT)2 transporter has been studied in brain mouse but data from the kidney have not been reported (PMID:18195986).                           | PMID:19472175, PMID:15854236, PMID:18408092, PMID:18195986, PMID:18195988                                                                                                                                                                                         | 0 | 4 |
| PIE1COMAFNc | transport of D-Proline by the apical PAT2 or PAT1 amino acid transporter in kidney and intestine                                                   | $pro\_1[4] + 4e\_1[4] \rightarrow pro\_1[4] + 4e\_1[4]$                           | 215338.1                         | (26358.1)                         | Proton-coupled amino acid transporter 1                                                                | Proton-coupled amino acid transporter 1                                                                |           | PAT2 is strongly expressed in heart and lung and more weakly in kidney and muscle (PMID:18408092). PAT2 does not strongly discriminate between L and D isomers (PMID:18408092). PAT1 proton amino acid co-transporter with L1 (PMID:18408092). Does not discriminate between L and D isomers, located on the apical membrane of kidney and intestine (PMID:18408092, PMID:18195986).                                                                                                                                                                                 | PMID:18195986, PMID:18408092, PMID:15854236, PMID:17123464, PMID:18195986, PMID:18195988                                                                                                                                                                          | 0 | 4 |
| PIE1COMAFNc | transport of D-Proline by the apical PAT2 or PAT1 amino acid transporter in kidney and intestine                                                   | $pro\_1[4] + 4e\_1[4] \rightarrow pro\_1[4] + 4e\_1[4]$                           | 215338.1                         | (26358.1)                         | Proton-coupled amino acid transporter 1                                                                | Proton-coupled amino acid transporter 1                                                                |           | PEPT1 appears to transport all di- and tri-peptides across the brush border of the intestinal cells (Chen et al., 1999; J. Biol. Chem., 274: 10000-10000). Groll (2003) Advanced nutrition and human metabolism, Wiley-Blackwell, chapter 10, 10th edition, page 100. PEPT1 is expressed highly in intestinal cells where as PEPT2 is localized in renal cells (PMID:10130447).                                                                                                                                                                                      | PMID:18195986, PMID:18408092, PMID:15854236, PMID:14977407, PMID:10130447                                                                                                                                                                                         | 0 | 4 |
| PIE1COMAFNc | hydrolysis of glycolipids in the small intestine for cellular uptake                                                                               | $glycolipid + m[4] \rightarrow glycolipid + m[4]$                                 | 18024.1                          | (5184.1)                          | Non-Pro-disaccharide                                                                                   | Non-Pro-disaccharide                                                                                   | 3.4.13.9  | 0                                                                                                                                                                                                                                                                                                                                                                                                                                                                                                                                                                    | PMID:12522498                                                                                                                                                                                                                                                     | 1 | 4 |
| PIE1COMAFNc | transport of L-Proline by the apical BMD9 amino acid transporter in kidney and intestine                                                           | $pro\_1[4] + 2\ m[4] + \text{c}[4] \rightarrow pro\_1[4] + 2\ m[4] + \text{c}[4]$ | (1308.1 and 57394.1)             | (54716.1 and 57393.1)             | Sodium and chloride-dependent transporter NTRP1 Collectin                                              | Sodium and chloride-dependent transporter NTRP1 Collectin                                              |           | BMD9 transporter is suggested to be a candidate for transporters (PMID:18022362). Associated with collectin in kidney.                                                                                                                                                                                                                                                                                                                                                                                                                                               | PMID:18022362, PMID:15854236, PMID:18195986, PMID:18408092                                                                                                                                                                                                        | 0 | 4 |
| PIE1COMAFNc | transport of L-Proline by the apical PAT2 or PAT1 amino acid transporter in kidney and intestine                                                   | $pro\_1[4] + 4e\_1[4] \rightarrow pro\_1[4] + 4e\_1[4]$                           | 215338.1                         | (26358.1)                         | Proton-coupled amino acid transporter 1                                                                | Proton-coupled amino acid transporter 1                                                                |           | PAT2 is strongly expressed in heart and lung and more weakly in kidney and muscle (PMID:18408092). PAT2 does not strongly discriminate between L and D isomers (PMID:18408092). PAT1 proton amino acid co-transporter with L1 (PMID:18408092). Does not discriminate between L and D isomers, located on the apical membrane of kidney and intestine (PMID:18408092, PMID:18195986).                                                                                                                                                                                 | PMID:18195986, PMID:18408092, PMID:15854236, PMID:17123464, PMID:18195986, PMID:18195988                                                                                                                                                                          | 0 | 4 |



|             |                                                                                                                                                  |                                                                                                                                                                     |                                 |                                   |           |                                                                                                                     |                                                                                                                                                                                                                                                                                                                                                                                                                                                                                                                                                                                                                                      |                                                                                                                                                                                                                                                                                                                                                                                                          |   |   |
|-------------|--------------------------------------------------------------------------------------------------------------------------------------------------|---------------------------------------------------------------------------------------------------------------------------------------------------------------------|---------------------------------|-----------------------------------|-----------|---------------------------------------------------------------------------------------------------------------------|--------------------------------------------------------------------------------------------------------------------------------------------------------------------------------------------------------------------------------------------------------------------------------------------------------------------------------------------------------------------------------------------------------------------------------------------------------------------------------------------------------------------------------------------------------------------------------------------------------------------------------------|----------------------------------------------------------------------------------------------------------------------------------------------------------------------------------------------------------------------------------------------------------------------------------------------------------------------------------------------------------------------------------------------------------|---|---|
| TALPATN:    | transport of taurine into the interstitial cells by PAT1                                                                                         | $\text{taur}[c] + \text{Na}[c] \rightarrow \text{taur}[c] + \text{Na}[c]$                                                                                           | 215338.1                        | (26398.1)                         |           | Proton-coupled amino acid transporter 2                                                                             | PAT1 is strongly expressed in heart and lung and more weakly in kidney and muscle (PMID 18409002). PAT1 does not strongly discriminate between L and D isomers (PMID 18409002). PAT1 protein is a dual cotransporter with L1 (SLC36A1), does not discriminate between L and D isomers, located on the apical membrane of kidney and intestine (PMID 18409002, PMID 18409003).                                                                                                                                                                                                                                                        | PMID 18070966, PMID 18195988, PMID 18409002, PMID 15345686, PMID 17124464, PMID 18434848                                                                                                                                                                                                                                                                                                                 | 0 | 4 |
| TDMATN:     | flumequine exit from the enterocytes                                                                                                             | $\text{flum}[c] + \text{ap}[c] + \text{Na}[c] \rightarrow \text{flum}[c] + \text{ap}[c] + \text{Na}[c]$                                                             |                                 |                                   |           |                                                                                                                     | flumequine exit from the enterocytes, depends on sodium and energy mediated by Na <sup>+</sup> /ATPase. Flumequine exit is directly coupled to ATP hydrolysis (PMID 12457066).                                                                                                                                                                                                                                                                                                                                                                                                                                                       | PMID 12064239, PMID 12345123, G.F. M. Bal (2006) Viarensin: their role in the human body, Blackwell publishing, chapter 31, page 275.                                                                                                                                                                                                                                                                    | 0 | 3 |
| TIBRATN:    | transport of L-Threonine into the interstitial cells by ATRB transporter                                                                         | $\text{thr}_L[\text{Aid}] + 2 \text{Na}[\text{Aid}] + \text{Cl}[\text{Aid}] \rightarrow \text{thr}_L[\text{Aid}] + 2 \text{Na}[\text{Aid}] + \text{Cl}[\text{Aid}]$ | 56774.1                         | (11284.1)                         |           | Sodium and chloride dependent neutral and basic amino acid transporter (B <sub>0</sub> )                            | ATRB is both sodium and chloride coupled, with sodium stoichiometry 2Na <sup>+</sup> :1L-threonine acid. The transporter is localized in the intestine, has a broad substrate specificity (both neutral and cationic amino acids), but is not involved in the transport of aspartate, glutamate and proline (PMID 18195988).                                                                                                                                                                                                                                                                                                         | PMID 18195988                                                                                                                                                                                                                                                                                                                                                                                            | 0 | 4 |
| TIBRIATN:   | transport of L-Threonine by the apical neutral amino acid transporter in kidney and intestine                                                    | $\text{thr}_L[\text{Aid}] + \text{Na}[\text{Aid}] \rightarrow \text{thr}_L[\text{Aid}] + \text{Na}[\text{Aid}]$                                                     | (78.1 or (74338.1 and 57394.1)) | (5424.1 and (57393.1 or 59272.1)) | 3.4.17.23 | Sodium-dependent neutral amino acid transporter B <sub>0</sub> AT1 and Collectives or Aspartate-converting enzyme 2 | transports all the neutral amino acids with preference for methionine, leucine and valine. Regulates interconversion with collectives protein for increased affinity. Found on kidney and intestine, however also reported to be expressed in skin. Regulates association with ACE2 for expression in intestine but with collectives for expression in kidney.                                                                                                                                                                                                                                                                       | PMID 10472175, PMID 15804236, PMID 18409002                                                                                                                                                                                                                                                                                                                                                              | 0 | 4 |
| TIBRELATN:  | transport of L-Threonine into the cell and efflux of L-Phenylalanine out of the cell by LAT1 on the basolateral surface of kidney and intestine. | $\text{thr}_L[\text{Aid}] + \text{phe}_L[\text{Aid}] \rightarrow \text{thr}_L[\text{Aid}] + \text{phe}_L[\text{Aid}]$                                               | (2539.1 and 17294.1)            | (23428.1 and 652.1)               |           | Large neutral amino acid transporter small substrate 2 4F2 cell surface antigen/heavy chain                         | higher affinity for small neutral amino acids than LAT1, function as an exchanger (anaplerotic system), at the basolateral surface of membranes in transporting epithelia. Localized in the proximal tubule of kidney, small intestine. Lower expression in ovary, placenta and brain. Homodimerization with CD-98 for trafficking of the complex to the membrane (Pflieger Arch Eur J Physiol (2003) 440:503-512 DOI 10.1007/s00400000274, PMID 12074070, J Am Soc Nephrol 14: 837-847, 2003, Pflieger Arch Eur J Physiol (2003) 440:529-533 DOI 10.1007/s0040004-002-0071-9, PMID 18195988, Am J Physiol (2003) 285: C1077-C1081). | Pflieger Arch Eur J Physiol (2003) 440:503-512 DOI 10.1007/s00400000274, PMID 12074070, J Am Soc Nephrol 14: 837-847, 2003, Pflieger Arch Eur J Physiol (2003) 440:529-533 DOI 10.1007/s0040004-002-0071-9, PMID 18195988, Am J Physiol (2003) 285: C1077-C1081.                                                                                                                                         | 0 | 4 |
| TIBRELATN:  | transport of L-Threonine into the cell and efflux of L-Phenylalanine out of the cell by LAT1 on the basolateral surface of kidney and intestine. | $\text{thr}_L[\text{Aid}] + \text{phe}_L[\text{Aid}] \rightarrow \text{thr}_L[\text{Aid}] + \text{phe}_L[\text{Aid}]$                                               | (2539.1 and 17294.1)            | (23428.1 and 652.1)               |           | Large neutral amino acid transporter small substrate 2 4F2 cell surface antigen/heavy chain                         | higher affinity for small neutral amino acids than LAT1, function as an exchanger (anaplerotic system), at the basolateral surface of membranes in transporting epithelia. Localized in the proximal tubule of kidney, small intestine. Lower expression in ovary, placenta and brain. Homodimerization with CD-98 for trafficking of the complex to the membrane (Pflieger Arch Eur J Physiol (2003) 440:503-512 DOI 10.1007/s00400000274, PMID 12074070, J Am Soc Nephrol 14: 837-847, 2003, Pflieger Arch Eur J Physiol (2003) 440:529-533 DOI 10.1007/s0040004-002-0071-9, PMID 18195988, Am J Physiol (2003) 285: C1077-C1081). | Pflieger Arch Eur J Physiol (2003) 440:503-512 DOI 10.1007/s00400000274, PMID 12074070, J Am Soc Nephrol 14: 837-847, 2003, Pflieger Arch Eur J Physiol (2003) 440:529-533 DOI 10.1007/s0040004-002-0071-9, PMID 18195988, Am J Physiol (2003) 285: C1077-C1081.                                                                                                                                         | 0 | 4 |
| TIBRATN:    | transport of L-Tyrosine into the interstitial cells by ATRB transporter                                                                          | $\text{tyr}_L[\text{Aid}] + 2 \text{Na}[\text{Aid}] + \text{Cl}[\text{Aid}] \rightarrow \text{tyr}_L[\text{Aid}] + 2 \text{Na}[\text{Aid}] + \text{Cl}[\text{Aid}]$ | 56774.1                         | (11284.1)                         |           | Sodium and chloride dependent neutral and basic amino acid transporter (B <sub>0</sub> )                            | ATRB is both sodium and chloride coupled, with sodium stoichiometry 2Na <sup>+</sup> :1L-threonine acid. The transporter is localized in the intestine, has a broad substrate specificity (both neutral and cationic amino acids), but is not involved in the transport of aspartate, glutamate and proline (PMID 18195988).                                                                                                                                                                                                                                                                                                         | PMID 18195988                                                                                                                                                                                                                                                                                                                                                                                            | 0 | 4 |
| TIBRIATN:   | transport of L-Tyrosine by the apical neutral amino acid transporter in kidney and intestine                                                     | $\text{tyr}_L[\text{Aid}] + \text{Na}[\text{Aid}] \rightarrow \text{tyr}_L[\text{Aid}] + \text{Na}[\text{Aid}]$                                                     | (78.1 or (74338.1 and 57394.1)) | (5424.1 and (57393.1 or 59272.1)) | 3.4.17.23 | Sodium-dependent neutral amino acid transporter B <sub>0</sub> AT1 and Collectives or Aspartate-converting enzyme 2 | transports all the neutral amino acids with preference for methionine, leucine and valine. Regulates interconversion with collectives protein for increased affinity. Found on kidney and intestine, however also reported to be expressed in skin. Regulates association with ACE2 for expression in intestine but with collectives for expression in kidney.                                                                                                                                                                                                                                                                       | PMID 10472175, PMID 15804236, PMID 18409002                                                                                                                                                                                                                                                                                                                                                              | 0 | 4 |
| TIBRELATN:  | transport of L-Tyrosine into the cell and efflux of L-Phenylalanine out of the cell by LAT1 on the basolateral surface of kidney and intestine.  | $\text{tyr}_L[\text{Aid}] + \text{phe}_L[\text{Aid}] \rightarrow \text{tyr}_L[\text{Aid}] + \text{phe}_L[\text{Aid}]$                                               | (2539.1 and 17294.1)            | (23428.1 and 652.1)               |           | Large neutral amino acid transporter small substrate 2 4F2 cell surface antigen/heavy chain                         | higher affinity for small neutral amino acids than LAT1, function as an exchanger (anaplerotic system), at the basolateral surface of membranes in transporting epithelia. Localized in the proximal tubule of kidney, small intestine. Lower expression in ovary, placenta and brain. Homodimerization with CD-98 for trafficking of the complex to the membrane (Pflieger Arch Eur J Physiol (2003) 440:503-512 DOI 10.1007/s00400000274, PMID 12074070, J Am Soc Nephrol 14: 837-847, 2003, Pflieger Arch Eur J Physiol (2003) 440:529-533 DOI 10.1007/s0040004-002-0071-9, PMID 18195988, Am J Physiol (2003) 285: C1077-C1081). | Pflieger Arch Eur J Physiol (2003) 440:503-512 DOI 10.1007/s00400000274, PMID 12074070, J Am Soc Nephrol 14: 837-847, 2003, Pflieger Arch Eur J Physiol (2003) 440:529-533 DOI 10.1007/s0040004-002-0071-9, PMID 18195988, Am J Physiol (2003) 285: C1077-C1081.                                                                                                                                         | 0 | 4 |
| TIBPLATN:   | transport of L-Tyrosine by LAT1 in association with 4F2hc, across the apical surface of the membrane.                                            | $\text{tyr}_L[\text{Aid}] + \text{leu}_L[\text{Aid}] \rightarrow \text{tyr}_L[\text{Aid}] + \text{leu}_L[\text{Aid}]$                                               | (2539.1 and 17294.1)            | (614 and 652.1)                   |           | Large neutral amino acid transporter small substrate 1 4F2 cell surface antigen/heavy chain                         | leucine is the only amino acid tested for efflux. Expressed in ovary, placenta, brain, spleen, testis, adrenal medulla and some tumor cells. Functions as a uniporter transporter system (J Biol Chem (2004) 279(10):10161-10166, PMID 15092402, requires homodimerization with the glycoprotein CD98 (Pflieger Arch Eur J Physiol (2003) 440:503-512 DOI 10.1007/s00400000274, PMID 10958373).                                                                                                                                                                                                                                      | Hans Gerhard Vogel, Thore J. Rock, Ingham, Dieter Mayer (2006), Drug discovery and evaluation: Safety and pharmaceuticals review, Springer publications, Chapter 15, page 456, table 3, PMID 12052295, PMID 12049292, European Journal of Pharmacology 441 (2002) 127-132, Am J Physiol Cell Physiol 281: C1077-C1081, 2003, Amino Acids (2005) 29: 229-233 DOI 10.1007/s00726-005-0221-8, PMID 15932210 | 0 | 4 |
| TIBREPLATN: | transport of L-Tyrosine into the cell and efflux of L-Phenylalanine out of the cell by LAT1 on the basolateral surface of kidney and intestine.  | $\text{tyr}_L[\text{Aid}] + \text{phe}_L[\text{Aid}] \rightarrow \text{tyr}_L[\text{Aid}] + \text{phe}_L[\text{Aid}]$                                               | (2539.1 and 17294.1)            | (23428.1 and 652.1)               |           | Large neutral amino acid transporter small substrate 2 4F2 cell surface antigen/heavy chain                         | higher affinity for small neutral amino acids than LAT1, function as an exchanger (anaplerotic system), at the basolateral surface of membranes in transporting epithelia. Localized in the proximal tubule of kidney, small intestine. Lower expression in ovary, placenta and brain. Homodimerization with CD-98 for trafficking of the complex to the membrane (Pflieger Arch Eur J Physiol (2003) 440:503-512 DOI 10.1007/s00400000274, PMID 12074070, J Am Soc Nephrol 14: 837-847, 2003, Pflieger Arch Eur J Physiol (2003) 440:529-533 DOI 10.1007/s0040004-002-0071-9, PMID 18195988, Am J Physiol (2003) 285: C1077-C1081). | Pflieger Arch Eur J Physiol (2003) 440:503-512 DOI 10.1007/s00400000274, PMID 12074070, J Am Soc Nephrol 14: 837-847, 2003, Pflieger Arch Eur J Physiol (2003) 440:529-533 DOI 10.1007/s0040004-002-0071-9, PMID 18195988, Am J Physiol (2003) 285: C1077-C1081.                                                                                                                                         | 0 | 4 |
| TIBRATN:    | transport of L-Tyrosine into the interstitial cells by ATRB transporter                                                                          | $\text{tyr}_L[\text{Aid}] + 2 \text{Na}[\text{Aid}] + \text{Cl}[\text{Aid}] \rightarrow \text{tyr}_L[\text{Aid}] + 2 \text{Na}[\text{Aid}] + \text{Cl}[\text{Aid}]$ | 56774.1                         | (11284.1)                         |           | Sodium and chloride dependent neutral and basic amino acid transporter (B <sub>0</sub> )                            | ATRB is both sodium and chloride coupled, with sodium stoichiometry 2Na <sup>+</sup> :1L-threonine acid. The transporter is localized in the intestine, has a broad substrate specificity (both neutral and cationic amino acids), but is not involved in the transport of aspartate, glutamate and proline (PMID 18195988).                                                                                                                                                                                                                                                                                                         | PMID 18195988                                                                                                                                                                                                                                                                                                                                                                                            | 0 | 4 |
| TIBRIATN:   | transport of L-Tyrosine by the apical neutral amino acid transporter B <sub>0</sub> AT1 in kidney and intestine                                  | $\text{tyr}_L[\text{Aid}] + \text{Na}[\text{Aid}] \rightarrow \text{tyr}_L[\text{Aid}] + \text{Na}[\text{Aid}]$                                                     | (78.1 or (74338.1 and 57394.1)) | (5424.1 and (57393.1 or 59272.1)) | 3.4.17.23 | Sodium-dependent neutral amino acid transporter B <sub>0</sub> AT1 and Collectives or Aspartate-converting enzyme 2 | transports all the neutral amino acids with preference for methionine, leucine and valine. Regulates interconversion with collectives protein for increased affinity. Found on kidney and intestine, however also reported to be expressed in skin. Regulates association with ACE2 for expression in intestine but with collectives for expression in kidney.                                                                                                                                                                                                                                                                       | PMID 10472175, PMID 15804236, PMID 18409002                                                                                                                                                                                                                                                                                                                                                              | 0 | 4 |
| TIBREPLATN: | transport of L-Tyrosine into the cell and efflux of L-Phenylalanine out of the cell by LAT1 on the basolateral surface of kidney and intestine.  | $\text{tyr}_L[\text{Aid}] + \text{phe}_L[\text{Aid}] \rightarrow \text{tyr}_L[\text{Aid}] + \text{phe}_L[\text{Aid}]$                                               | (2539.1 and 17294.1)            | (23428.1 and 652.1)               |           | Large neutral amino acid transporter small substrate 2 4F2 cell surface antigen/heavy chain                         | higher affinity for small neutral amino acids than LAT1, function as an exchanger (anaplerotic system), at the basolateral surface of membranes in transporting epithelia. Localized in the proximal tubule of kidney, small intestine. Lower expression in ovary, placenta and brain. Homodimerization with CD-98 for trafficking of the complex to the membrane (Pflieger Arch Eur J Physiol (2003) 440:503-512 DOI 10.1007/s00400000274, PMID 12074070, J Am Soc Nephrol 14: 837-847, 2003, Pflieger Arch Eur J Physiol (2003) 440:529-533 DOI 10.1007/s0040004-002-0071-9, PMID 18195988, Am J Physiol (2003) 285: C1077-C1081). | Pflieger Arch Eur J Physiol (2003) 440:503-512 DOI 10.1007/s00400000274, PMID 12074070, J Am Soc Nephrol 14: 837-847, 2003, Pflieger Arch Eur J Physiol (2003) 440:529-533 DOI 10.1007/s0040004-002-0071-9, PMID 18195988, Am J Physiol (2003) 285: C1077-C1081.                                                                                                                                         | 0 | 4 |





[illegible]

LB = lower bound, UB = upper bound



|              |                                                                                              |       |      |                                                                                                                                                                                                                                                                                                                         |                                                         |
|--------------|----------------------------------------------------------------------------------------------|-------|------|-------------------------------------------------------------------------------------------------------------------------------------------------------------------------------------------------------------------------------------------------------------------------------------------------------------------------|---------------------------------------------------------|
| BTAGPAT120   | BTIdaaACP[c] + BTIdacg[p]c -> BTACP[c] + BTpa120[c]                                          | 0     | 1000 | (BT_0243 or BT_4462)                                                                                                                                                                                                                                                                                                    | R. thelatoaomicron metabo-<br>transport demand reaction |
| BTAGPAT140   | BTmpaACP[c] + BTIdacg[p]c -> BTACP[c] + BTpa140[c]                                           | 0     | 1000 | (BT_0243 or BT_4462)                                                                                                                                                                                                                                                                                                    | R. thelatoaomicron metabo-<br>transport demand reaction |
| BTAGPAT160   | BTpabaACP[c] + BTIdacg[p]c -> BTACP[c] + BTpa160[c]                                          | 0     | 1000 | (BT_0243 or BT_4462)                                                                                                                                                                                                                                                                                                    | R. thelatoaomicron metabo-<br>transport demand reaction |
| BTAGPAT180   | BTIdacg[p]c + BTocdaACP[c] -> BTACP[c] + BTpa180[c]                                          | 0     | 1000 | (BT_0243 or BT_4462)                                                                                                                                                                                                                                                                                                    | R. thelatoaomicron metabo-<br>transport demand reaction |
| BTAGPAT181   | BTIdoc11eg[p]c + BTocdaACP[c] -> BTACP[c] + BTpa181[c]                                       | 0     | 1000 | (BT_0243 or BT_4462)                                                                                                                                                                                                                                                                                                    | R. thelatoaomicron metabo-<br>transport demand reaction |
| BTACFR       | BTadp[c] + BTp[c] + BTacg5ac[c] <=> BTd[c] + BTadp[c] + BTacg5[c]                            | -1000 | 1000 | BT_3759                                                                                                                                                                                                                                                                                                                 | R. thelatoaomicron metabo-<br>transport demand reaction |
| BTABC        | BTb2[c] + BTacy[c] <=> BTad[c] + BTacy-L[c]                                                  | -1000 | 1000 | BT_2797                                                                                                                                                                                                                                                                                                                 | R. thelatoaomicron metabo-<br>transport demand reaction |
| BTAKYSSS_1   | BTb2[c] + BTacy[c] <=> BTad[c] + BTacy[c]                                                    | -1000 | 1000 | BT_4451                                                                                                                                                                                                                                                                                                                 | R. thelatoaomicron metabo-<br>transport demand reaction |
| BTAHXASE2e   | BTb2[c] + BTc2da2m2[c] -> BTacgm[c] + BTc2da2m2m[c]                                          | 0     | 1000 | (BT_4394 or BT_4395 or BT_4337 or BT_3598 or BT_1627 or BT_3868 or BT_0459 or BT_0460 or BT_0506 or BT_4681 or BT_1621 or BT_3178 or BT_0456 or BT_1051 or BT_2459)                                                                                                                                                     | R. thelatoaomicron metabo-<br>transport demand reaction |
| BTAHXASE3e   | BTb2[c] + BTc2m[c] -> 2 BTacgm[c]                                                            | 0     | 1000 | (BT_4394 or BT_4395 or BT_4337 or BT_3598 or BT_1627 or BT_3868 or BT_0459 or BT_0460 or BT_0506 or BT_4681 or BT_1621 or BT_3178 or BT_0456 or BT_1051 or BT_2459)                                                                                                                                                     | R. thelatoaomicron metabo-<br>transport demand reaction |
| BTAHXASE5e   | 2 BTb2[c] + BTc2m2m[c] -> 2 BTacgm[c] + BTc2m[c]                                             | 0     | 1000 | (BT_4394 or BT_4395 or BT_4337 or BT_3598 or BT_1627 or BT_3868 or BT_0459 or BT_0460 or BT_0506 or BT_4681 or BT_1621 or BT_3178 or BT_0456 or BT_1051 or BT_2459)                                                                                                                                                     | R. thelatoaomicron metabo-<br>transport demand reaction |
| BTAHMMP5     | 2 BTd[c] + BTac[c] -> BTp[c] + BTad4mmp[c] + BTacm[c]                                        | 0     | 1000 | BT_0650                                                                                                                                                                                                                                                                                                                 | R. thelatoaomicron metabo-<br>transport demand reaction |
| BTAHSEB2     | BTacm[c] + BTb2[c] -> BTd[c] + BTac[c] + BTacy-L[c]                                          | 0     | 1000 | (BT_1923 or BT_2387)                                                                                                                                                                                                                                                                                                    | R. thelatoaomicron metabo-<br>transport demand reaction |
| BTAHSEB3     | BTacm[c] + BTad[c] + BTad[c] <=> BTd[c] + BTac[c] + BTacy-L[c] + BTad[c] + BTad[c] + BTad[c] | -1000 | 1000 | (BT_1923 or BT_2387)                                                                                                                                                                                                                                                                                                    | R. thelatoaomicron metabo-<br>transport demand reaction |
| BTACART      | BTacm[c] + BT100H[c] <=> BTp[c] + BTd[c]                                                     | -1000 | 1000 | BT_3812                                                                                                                                                                                                                                                                                                                 | R. thelatoaomicron metabo-<br>transport demand reaction |
| BTAPDCOATA   | BTac[c] + BT14mpaACP[c] <=> BTACP[c] + BTadpdc[c]                                            | -1000 | 1000 | BT_0789                                                                                                                                                                                                                                                                                                                 | R. thelatoaomicron metabo-<br>transport demand reaction |
| BTAPDCOATA   | BTac[c] + BT12mpaACP[c] <=> BTACP[c] + BTadpdc[c]                                            | -1000 | 1000 | BT_0789                                                                                                                                                                                                                                                                                                                 | R. thelatoaomicron metabo-<br>transport demand reaction |
| BTARC2       | BTap[c] + BTc3[c] + BTac[c] -> BTd[c] + BTp[c] + BTadp[c] + BTacm[c]                         | 0     | 1000 | BT_2518                                                                                                                                                                                                                                                                                                                 | R. thelatoaomicron metabo-<br>transport demand reaction |
| BTARC3       | BTacm[c] <=> BTacm[c]                                                                        | -1000 | 1000 | BT_2518                                                                                                                                                                                                                                                                                                                 | R. thelatoaomicron metabo-<br>transport demand reaction |
| BTARcy       | BTc2[c] + BTac[c] <=> BTd[c] + BTacm[c]                                                      | -1000 | 1000 | BT_2518                                                                                                                                                                                                                                                                                                                 | R. thelatoaomicron metabo-<br>transport demand reaction |
| BTAKP1       | 3 BTb2[c] + BTad[c] -> 2 BTd[c] + 3 BTp[c] + BTadp[c]                                        | 0     | 1000 | (BT_0028 or BT_3708 or BT_4363)                                                                                                                                                                                                                                                                                         | R. thelatoaomicron metabo-<br>transport demand reaction |
| BTALALA      | BTap[c] + 2 BTab-D[c] -> BTd[c] + BTp[c] + BTadp[c] + BTadp[c]                               | 0     | 1000 | BT_3713                                                                                                                                                                                                                                                                                                                 | R. thelatoaomicron metabo-<br>transport demand reaction |
| BTALALAd     | BTb2[c] + BTadab[c] -> 2 BTab-D[c]                                                           | 0     | 1000 | (BT_3007 or BT_3187)                                                                                                                                                                                                                                                                                                    | R. thelatoaomicron metabo-<br>transport demand reaction |
| BTALAAP1c    | BTb2[c] + BTadap[c] <=> BTab-L[c] + BTap-L[c]                                                | -1000 | 1000 | (BT_3464 or BT_3926 or BT_3996 or BT_0149 or BT_4193 or BT_3254 or BT_1260 or BT_1261 or BT_1314 or BT_1838)                                                                                                                                                                                                            | R. thelatoaomicron metabo-<br>transport demand reaction |
| BTALAAPb     | BTd[c] + BTadap[c] -> BTd[c] + BTadp[c]                                                      | 0     | 1000 | (BT_0580 or BT_4385 or BT_1086)                                                                                                                                                                                                                                                                                         | R. thelatoaomicron metabo-<br>transport demand reaction |
| BTALAD_R     | BTb2[c] + BTab-L[c] -> BTad[c] <=> BTd[c] + BTp[c] + BTadp[c] + BTadp[c]                     | -1000 | 1000 | BT_1554                                                                                                                                                                                                                                                                                                                 | R. thelatoaomicron metabo-<br>transport demand reaction |
| BTALAGL1c    | BTb2[c] + BTadp[c] <=> BTab-L[c] + BTd-L[c]                                                  | -1000 | 1000 | (BT_3464 or BT_3926 or BT_3996 or BT_0149 or BT_4193 or BT_3254 or BT_1260 or BT_1261 or BT_1314 or BT_1838)                                                                                                                                                                                                            | R. thelatoaomicron metabo-<br>transport demand reaction |
| BTALAGL2c    | BTd[c] + BTadp[c] -> BTd[c] + BTadp[c]                                                       | 0     | 1000 | (BT_0580 or BT_4385 or BT_1086)                                                                                                                                                                                                                                                                                         | R. thelatoaomicron metabo-<br>transport demand reaction |
| BTALAGL3c    | BTb2[c] + BTadp[c] <=> BTab-L[c] + BTab-L[c]                                                 | -1000 | 1000 | (BT_3464 or BT_3926 or BT_3996 or BT_0149 or BT_4193 or BT_3254 or BT_1260 or BT_1261 or BT_1314 or BT_1838)                                                                                                                                                                                                            | R. thelatoaomicron metabo-<br>transport demand reaction |
| BTALAGL3b    | BTd[c] + BTadp[c] -> BTd[c] + BTadp[c]                                                       | 0     | 1000 | (BT_0580 or BT_4385 or BT_1086)                                                                                                                                                                                                                                                                                         | R. thelatoaomicron metabo-<br>transport demand reaction |
| BTALAGL4c    | BTb2[c] + BTadp[c] <=> BTab-L[c] + BTd-L[c]                                                  | -1000 | 1000 | (BT_3464 or BT_3926 or BT_3996 or BT_0149 or BT_4193 or BT_3254 or BT_1260 or BT_1261 or BT_1314 or BT_1838)                                                                                                                                                                                                            | R. thelatoaomicron metabo-<br>transport demand reaction |
| BTALAGL5c    | BTd[c] + BTadp[c] -> BTd[c] + BTadp[c]                                                       | 0     | 1000 | (BT_0580 or BT_4385 or BT_1086)                                                                                                                                                                                                                                                                                         | R. thelatoaomicron metabo-<br>transport demand reaction |
| BTALAHSc     | BTb2[c] + BTadp[c] <=> BTab-L[c] + BTab-L[c]                                                 | -1000 | 1000 | (BT_3464 or BT_3926 or BT_3996 or BT_0149 or BT_4193 or BT_3254 or BT_1260 or BT_1261 or BT_1314 or BT_1838)                                                                                                                                                                                                            | R. thelatoaomicron metabo-<br>transport demand reaction |
| BTALAHb      | BTd[c] + BTadp[c] -> BTd[c] + BTadp[c]                                                       | 0     | 1000 | (BT_0580 or BT_4385 or BT_1086)                                                                                                                                                                                                                                                                                         | R. thelatoaomicron metabo-<br>transport demand reaction |
| BTALAJ1c     | BTb2[c] + BTadp[c] <=> BTab-L[c] + BTad-L[c]                                                 | -1000 | 1000 | (BT_3464 or BT_3926 or BT_3996 or BT_0149 or BT_4193 or BT_3254 or BT_1260 or BT_1261 or BT_1314 or BT_1838)                                                                                                                                                                                                            | R. thelatoaomicron metabo-<br>transport demand reaction |
| BTALAJ3      | BTd[c] + BTadp[c] -> BTd[c] + BTadp[c]                                                       | 0     | 1000 | (BT_0580 or BT_4385 or BT_1086)                                                                                                                                                                                                                                                                                         | R. thelatoaomicron metabo-<br>transport demand reaction |
| BTALATH1c    | BTb2[c] + BTadp[c] <=> BTab-L[c] + BTd-L[c]                                                  | -1000 | 1000 | (BT_3464 or BT_3926 or BT_3996 or BT_0149 or BT_4193 or BT_3254 or BT_1260 or BT_1261 or BT_1314 or BT_1838)                                                                                                                                                                                                            | R. thelatoaomicron metabo-<br>transport demand reaction |
| BTALATHb     | BTd[c] + BTadp[c] -> BTd[c] + BTadp[c]                                                       | 0     | 1000 | (BT_0580 or BT_4385 or BT_1086)                                                                                                                                                                                                                                                                                         | R. thelatoaomicron metabo-<br>transport demand reaction |
| BTALAw       | BTad[c] + BTad-L[c] <=> BTab-L[c] + BTad[c]                                                  | -1000 | 1000 | BT_4476                                                                                                                                                                                                                                                                                                                 | R. thelatoaomicron metabo-<br>transport demand reaction |
| BTALCD19     | BTd[c] + BTadp[c] + BTadp[c] <=> BTadp[c] + BTd[c]                                           | -1000 | 1000 | (BT_0535 or BT_4512)                                                                                                                                                                                                                                                                                                    | R. thelatoaomicron metabo-<br>transport demand reaction |
| BTALCD2a     | BTad[c] + BTadp[c] <=> BTd[c] + BTadp[c] + BTadp[c]                                          | -1000 | 1000 | (BT_0535 or BT_4512)                                                                                                                                                                                                                                                                                                    | R. thelatoaomicron metabo-<br>transport demand reaction |
| BTALKP       | BTb2[c] + BTadp[c] -> BTp[c] + BTadp[c]                                                      | 0     | 1000 | (BT_0028 or BT_3708 or BT_4363)                                                                                                                                                                                                                                                                                         | R. thelatoaomicron metabo-<br>transport demand reaction |
| BTALR2       | BTd[c] + BTadp[c] + BTadp[c] -> BTadp[c] + BTacm[c]                                          | 0     | 1000 |                                                                                                                                                                                                                                                                                                                         | R. thelatoaomicron metabo-<br>transport demand reaction |
| BTALR4a      | BTd[c] + BTadp[c] + BTacm[c] -> BT2p2d-R[c] + BTadp[c]                                       | 0     | 1000 | (BT_3617 or BT_4424)                                                                                                                                                                                                                                                                                                    | R. thelatoaomicron metabo-<br>transport demand reaction |
| BTALRH       | BTad[c] -> BTb2[c] + BTadp[c]                                                                | 0     | 1000 | BT_0486                                                                                                                                                                                                                                                                                                                 | R. thelatoaomicron metabo-<br>transport demand reaction |
| BTAMAA       | BTb2[c] + BTacm[c] -> BTab-L[c] + BTacm[c]                                                   | 0     | 1000 | (BT_1991 or BT_2027 or BT_2141 or BT_3200 or BT_4736 or BT_0706 or BT_1168 or BT_1519 or BT_1641 or BT_1706 or BT_4021)                                                                                                                                                                                                 | R. thelatoaomicron metabo-<br>transport demand reaction |
| BTAMAL1      | BTad[c] + BTadp[c] -> BTd-L[c] + BTadp[c]                                                    | 0     | 1000 | BT_2146                                                                                                                                                                                                                                                                                                                 | R. thelatoaomicron metabo-<br>transport demand reaction |
| BTAMAL2      | BTad[c] + BTadp[c] -> BTd-L[c] + BTadp[c]                                                    | 0     | 1000 | BT_2146                                                                                                                                                                                                                                                                                                                 | R. thelatoaomicron metabo-<br>transport demand reaction |
| BTAMAL3      | BTad[c] + BTadp[c] -> BTd-L[c] + BTadp[c]                                                    | 0     | 1000 | BT_2146                                                                                                                                                                                                                                                                                                                 | R. thelatoaomicron metabo-<br>transport demand reaction |
| BTAMAL4      | BTad[c] + BTadp[c] -> BTd-L[c] + BTadp[c]                                                    | 0     | 1000 | BT_2146                                                                                                                                                                                                                                                                                                                 | R. thelatoaomicron metabo-<br>transport demand reaction |
| BTAMANNANase | 139 BTb2[c] + BTannun140[c] <=> 140 BTadp[c]                                                 | -1000 | 1000 | (BT_3990 or BT_2629 or BT_2199 or BT_3784 or BT_3962 or BT_4092) and (BT_3991 or BT_3858 or BT_1769 or BT_1878 or BT_3130 or BT_3773) and (BT_3994 or BT_3792 or BT_2623 or BT_2949 or BT_3801 or BT_1883 or BT_3524 or BT_3301 or BT_3521) and (BT_2625 and BT_2626) or (BT_3788 and BT_3789) or (BT_3854 and BT_3855) | R. thelatoaomicron metabo-<br>transport demand reaction |
| BTAMAG7b     | BTadp[c] + BTadp[c] <=> BTadp[c] + BTadp[c]                                                  | -1000 | 1000 | BT_1442                                                                                                                                                                                                                                                                                                                 | R. thelatoaomicron metabo-<br>transport demand reaction |
| BTAMMQ18     | BTadp[c] + BT2dmq8[c] -> BTd[c] + BTacy[c] + BTmq8[c]                                        | 0     | 1000 | (BT_0853 or BT_4216)                                                                                                                                                                                                                                                                                                    | R. thelatoaomicron metabo-<br>transport demand reaction |
| BTAMMQ10     | BTd[c] + BTadp[c] + BT2dmq10[c] -> BTacy[c] + BTmq10[c]                                      | 0     | 1000 | (BT_0853 or BT_4216)                                                                                                                                                                                                                                                                                                    | R. thelatoaomicron metabo-<br>transport demand reaction |
| BTAMMQ11     | BTd[c] + BTadp[c] + BT2dmq11[c] -> BTacy[c] + BTmq11[c]                                      | 0     | 1000 | (BT_0853 or BT_4216)                                                                                                                                                                                                                                                                                                    | R. thelatoaomicron metabo-<br>transport demand reaction |
| BTAMMQ7      | BTd[c] + BTadp[c] + BT2dmq7[c] -> BTacy[c] + BTmq7[c]                                        | 0     | 1000 | (BT_0853 or BT_4216)                                                                                                                                                                                                                                                                                                    | R. thelatoaomicron metabo-<br>transport demand reaction |
| BTAMMQ8      | BTd[c] + BTadp[c] + BT2dmq8[c] -> BTacy[c] + BTmq8[c]                                        | 0     | 1000 | (BT_0853 or BT_4216)                                                                                                                                                                                                                                                                                                    | R. thelatoaomicron metabo-<br>transport demand reaction |
| BTAMMQ9      | BTd[c] + BTadp[c] + BT2dmq9[c] -> BTacy[c] + BTmq9[c]                                        | 0     | 1000 | (BT_0853 or BT_4216)                                                                                                                                                                                                                                                                                                    | R. thelatoaomicron metabo-<br>transport demand reaction |
| BTAMPN       | BTb2[c] + BTmp[c] -> BTd[c] + BTmp[c]                                                        | 0     | 1000 | BT_0888                                                                                                                                                                                                                                                                                                                 | R. thelatoaomicron metabo-<br>transport demand reaction |
| BTAMPTASECG  | BTb2[c] + BTgby[c] -> BTd[c] + BTcy-L[c]                                                     | 0     | 1000 | (BT_0638 or BT_1615 or BT_2706 or BT_4045)                                                                                                                                                                                                                                                                              | R. thelatoaomicron metabo-<br>transport demand reaction |
| BTAMPTASEPG  | BTb2[c] + BTpogby[c] -> BTd[c] + BTpro-L[c]                                                  | 0     | 1000 | (BT_3464 or BT_3926 or BT_3996 or BT_0149 or BT_4193 or BT_3254 or BT_1260 or BT_1261 or BT_1314)                                                                                                                                                                                                                       | R. thelatoaomicron metabo-<br>transport demand reaction |
| BTAMPTASEPGc | BTb2[c] + BTpogby[c] -> BTpro-L[c] + BTgby[c]                                                | 0     | 1000 | BT_0587                                                                                                                                                                                                                                                                                                                 | R. thelatoaomicron metabo-<br>transport demand reaction |
| BTAMY1c      | 8 BTb2[c] + BTach1[c] -> 8 BTg-L[c] + BTad2[c]                                               | 0     | 1000 | (BT_3698 and BT_3701 and BT_3702) or (BT_0773 and BT_3701 and BT_3702) or (BT_4305 and BT_3701 and BT_3702)                                                                                                                                                                                                             | R. thelatoaomicron metabo-<br>transport demand reaction |
| BTAMYLe      | 199 BTb2[c] + BTamy300[c] -> 100 BTg-L[c] + 100 BTadp[c] + 100 BTadp[c]                      | 0     | 1000 | (BT_3698 and BT_3701 and BT_3702) or (BT_0773 and BT_3701 and BT_3702) or (BT_4305 and BT_3701 and BT_3702)                                                                                                                                                                                                             | R. thelatoaomicron metabo-<br>transport demand reaction |
| BTAMYc       | 499 BTb2[c] + BTach1200[c] -> 100 BTg-L[c] + 100 BTadp[c] + 100 BTadp[c]                     | 0     | 1000 | (BT_3698 and BT_3701 and BT_3702) or (BT_0773 and BT_3701 and BT_3702) or (BT_4305 and BT_3701 and BT_3702)                                                                                                                                                                                                             | R. thelatoaomicron metabo-<br>transport demand reaction |
| BTANPRT      | BTpp[c] + BTad[c] -> BTp[c] + BTadp[c]                                                       | 0     | 1000 | BT_0530                                                                                                                                                                                                                                                                                                                 | R. thelatoaomicron metabo-<br>transport demand reaction |
| BTANS        | BTg-L[c] + BTcho[c] -> BTd[c] + BTg-L[c] + BTp[c] + BTadp[c]                                 | 0     | 1000 | (BT_0531 and BT_0532)                                                                                                                                                                                                                                                                                                   | R. thelatoaomicron metabo-<br>transport demand reaction |
| BTANS2       | BTad[c] + BTcho[c] -> BTb2[c] + BTd[c] + BTp[c] + BTadp[c]                                   | 0     | 1000 | (BT_0531 and BT_0532)                                                                                                                                                                                                                                                                                                   | R. thelatoaomicron metabo-<br>transport demand reaction |
| BTAGOUTd     | BTd[c] + BTadp[c] -> BTc2[c] + BTac[c]                                                       | 0     | 1000 |                                                                                                                                                                                                                                                                                                                         | R. thelatoaomicron metabo-<br>transport demand reaction |
| BTAXSs       | BTd[c] + BTab-L[c] + BTpoc[c] <=> BToc[c] + BTc2[c] + BTacm[c]                               | -1000 | 1000 | (BT_0870 or BT_1443)                                                                                                                                                                                                                                                                                                    | R. thelatoaomicron metabo-<br>transport demand reaction |
| BTAXS2r      | BTd[c] + BTab-L[c] + BTpocACP[c] <=> BTACP[c] + BTc2[c] + BTacm[c]                           | -1000 | 1000 | (BT_0870 or BT_1443)                                                                                                                                                                                                                                                                                                    | R. thelatoaomicron metabo-<br>transport demand reaction |
| BTAPRALR     | BTd[c] + BTadp[c] + BTap[c] -> BTadp[c] + BTap[c]                                            | 0     | 1000 | BT_3728                                                                                                                                                                                                                                                                                                                 | R. thelatoaomicron metabo-<br>transport demand reaction |

|                 |                                                                                                                                                                             |       |      |                                                                                                                                                                                                                                                                |                                                            |
|-----------------|-----------------------------------------------------------------------------------------------------------------------------------------------------------------------------|-------|------|----------------------------------------------------------------------------------------------------------------------------------------------------------------------------------------------------------------------------------------------------------------|------------------------------------------------------------|
| BTARBASE3e      | $2 \text{ BThb2}[e] + \text{BTarbase}[e] \rightarrow 2 \text{ BThb-L}[e]$                                                                                                   | 0     | 1000 | (BT_0348 or BT_3096 or BT_3657)                                                                                                                                                                                                                                | <i>R. shetaiastrum</i> meibohi / transport demand reaction |
| BTARBINANAS1e   | $100 \text{ BThb2}[e] + \text{BTarbinan0}[e] \rightarrow 97 \text{ BThb-L}[e] + \text{BThp}[e] + \text{BTrame}[e] + 2 \text{ BThp}[e]$                                      | -1000 | 1000 | (BT_0360 or BT_0367 or BT_0368 or BT_0369) and (BT_4152 or BT_4667 or BT_4668) and (BT_4153 or BT_4170 and BT_4175 or BT_4176) and (BT_0361 and BT_0362) and (BT_4164 and BT_4165) and (BT_0363 and BT_0364) or (BT_4670 and BT_4671) or (BT_3080 and BT_3681) | <i>R. shetaiastrum</i> meibohi / transport demand reaction |
| BTARBINOGALAS1e | $659 \text{ BThb2}[e] + \text{BTarbinogale}[e] \rightarrow 15 \text{ BThp}[e] + 92 \text{ BThb-L}[e] + 552 \text{ BThp}[e] + 15 \text{ BThp}[e]$                            | 0     | 1000 | (BT_0348 or BT_0326 or BT_3675 or BT_3685) and BT_0290 and BT_3087 and (BT_3045 and BT_3046) or (BT_0268 and BT_0269) or (BT_0272 and BT_0273) or (BT_3680 and BT_3681)                                                                                        | <i>R. shetaiastrum</i> meibohi / transport demand reaction |
| BTARAI          | $\text{BThab-L}[e] \leftrightarrow \text{BThm-L}[e]$                                                                                                                        | -1000 | 1000 | BT_0351                                                                                                                                                                                                                                                        | <i>R. shetaiastrum</i> meibohi / transport demand reaction |
| BTARBIg2        | $\text{BTh}[e] + \text{BThab-L}[e] \leftrightarrow \text{BTh}[e] + \text{BThab-L}[e]$                                                                                       | -1000 | 1000 | BT_0454                                                                                                                                                                                                                                                        | <i>R. shetaiastrum</i> meibohi / transport demand reaction |
| BTARGAB1c       | $\text{BThb2}[e] + \text{BThargab}[e] \leftrightarrow 2 \text{ BThg-L}[e]$                                                                                                  | -1000 | 1000 | BT_1846                                                                                                                                                                                                                                                        | <i>R. shetaiastrum</i> meibohi / transport demand reaction |
| BTARGARG        | $\text{BTh}[e] + \text{BTharg}[e] \leftrightarrow \text{BTh}[e] + \text{BTharg}[e]$                                                                                         | -1000 | 1000 | (BT_0580 or BT_4385 or BT_1086)                                                                                                                                                                                                                                | <i>R. shetaiastrum</i> meibohi / transport demand reaction |
| BTARGIC         | $\text{BTh}[e] + \text{BTharg-L}[e] \leftrightarrow \text{BTh2ol}[e] + \text{BTharg}[e]$                                                                                    | 0     | 1000 | BT_3394                                                                                                                                                                                                                                                        | <i>R. shetaiastrum</i> meibohi / transport demand reaction |
| BTARGIN         | $\text{BThb2}[e] + \text{BTharg-L}[e] \rightarrow \text{BThm}[e] + \text{BTharg}[e]$                                                                                        | 0     | 1000 | BT_1099                                                                                                                                                                                                                                                        | <i>R. shetaiastrum</i> meibohi / transport demand reaction |
| BTARGSL         | $\text{BTharg}[e] \leftrightarrow \text{BThm}[e] + \text{BThg-L}[e]$                                                                                                        | -1000 | 1000 | BT_3733                                                                                                                                                                                                                                                        | <i>R. shetaiastrum</i> meibohi / transport demand reaction |
| BTARGSSr        | $\text{BTharg}[e] + \text{BTharg-L}[e] \leftrightarrow \text{BThg-L}[e] + \text{BTharg}[e] + \text{BTh2ol}[e] + \text{BTharg}[e]$                                           | -1000 | 1000 | BT_3760                                                                                                                                                                                                                                                        | <i>R. shetaiastrum</i> meibohi / transport demand reaction |
| BTARGube        | $\text{BThb2}[e] + \text{BTharg}[e] + \text{BThg-L}[e] \rightarrow \text{BTh}[e] + \text{BThp}[e] + \text{BThp}[e] + \text{BThab-L}[e]$                                     | 0     | 1000 | BT_4049                                                                                                                                                                                                                                                        | <i>R. shetaiastrum</i> meibohi / transport demand reaction |
| BTAROH          | $\text{BTharg}[e] \rightarrow \text{BThb2}[e] + \text{BTh2ol}[e] + \text{BThp-L}[e]$                                                                                        | 0     | 1000 | BT_3936                                                                                                                                                                                                                                                        | <i>R. shetaiastrum</i> meibohi / transport demand reaction |
| BTAS1AS1e_HIS1  | $\text{BThb2}[e] + \text{BTharg\_deg\_3e}[e] \rightarrow \text{BTh}[e] + \text{BThg\_deg\_3e}[e] + \text{BTh2ol}[e]$                                                        | 0     | 1000 |                                                                                                                                                                                                                                                                | <i>R. shetaiastrum</i> meibohi / transport demand reaction |
| BTAS1AS1e_HIS2  | $\text{BThb2}[e] + \text{BThg\_deg\_3e}[e] \rightarrow \text{BThp}[e] + \text{BTh2ol}[e] + \text{BThg\_deg\_10e}[e]$                                                        | 0     | 1000 | (BT_4656 and BT_0238)                                                                                                                                                                                                                                          | <i>R. shetaiastrum</i> meibohi / transport demand reaction |
| BTAS1AS1e_HIS3  | $2 \text{ BThb2}[e] + \text{BThg\_deg\_3e}[e] \rightarrow 2 \text{ BTh}[e] + \text{BThg\_deg\_4e}[e] + 2 \text{ BTh2ol}[e]$                                                 | 0     | 1000 | (BT_4656 and BT_0238)                                                                                                                                                                                                                                          | <i>R. shetaiastrum</i> meibohi / transport demand reaction |
| BTAS1AS2e_HIS2  | $\text{BThb2}[e] + \text{BThg\_deg\_3e}[e] \rightarrow \text{BTh}[e] + \text{BThg\_deg\_4e}[e] + \text{BTh2ol}[e]$                                                          | 0     | 1000 | (BT_4656 and BT_0238)                                                                                                                                                                                                                                          | <i>R. shetaiastrum</i> meibohi / transport demand reaction |
| BTASAD          | $\text{BTh}[e] + \text{BThad}[e] + \text{BTharg}[e] \rightarrow \text{BThab}[e] + \text{BThp}[e] + \text{BThm}[e]$                                                          | 0     | 1000 | BT_3636                                                                                                                                                                                                                                                        | <i>R. shetaiastrum</i> meibohi / transport demand reaction |
| BTASNN          | $\text{BThb2}[e] + \text{BThaa-L}[e] \rightarrow \text{BThp-L}[e] + \text{BThab}[e]$                                                                                        | 0     | 1000 | (BT_0526 or BT_2404 or BT_2577)                                                                                                                                                                                                                                | <i>R. shetaiastrum</i> meibohi / transport demand reaction |
| BTASNS1         | $\text{BThb2}[e] + \text{BThap}[e] + \text{BThap-L}[e] + \text{BThg-L}[e] \rightarrow \text{BTh}[e] + \text{BThg-L}[e] + \text{BThap}[e] + \text{BThp}[e] + \text{BThm}[e]$ | 0     | 1000 | BT_0551                                                                                                                                                                                                                                                        | <i>R. shetaiastrum</i> meibohi / transport demand reaction |
| BTASNS2         | $\text{BThap}[e] + \text{BThg-L}[e] + \text{BThab}[e] \rightarrow \text{BThb2}[e] + \text{BTharg}[e] + \text{BThm}[e]$                                                      | 0     | 1000 |                                                                                                                                                                                                                                                                | <i>R. shetaiastrum</i> meibohi / transport demand reaction |
| BTASNS2r        | $\text{BThp}[e] + \text{BThaa-L}[e] \rightarrow \text{BTh}[e] + \text{BThaa-L}[e]$                                                                                          | -1000 | 1000 |                                                                                                                                                                                                                                                                | <i>R. shetaiastrum</i> meibohi / transport demand reaction |
| BTASPIDC        | $\text{BTh}[e] + \text{BThap-L}[e] \rightarrow \text{BTh2ol}[e] + \text{BThab-L}[e]$                                                                                        | 0     | 1000 | BT_4309                                                                                                                                                                                                                                                        | <i>R. shetaiastrum</i> meibohi / transport demand reaction |
| BTASPT          | $\text{BThap-L}[e] + \text{BThp}[e] \rightarrow \text{BTh}[e] + \text{BThp}[e] + \text{BThap}[e]$                                                                           | 0     | 1000 | (BT_0741 and BT_0742)                                                                                                                                                                                                                                          | <i>R. shetaiastrum</i> meibohi / transport demand reaction |
| BTASPK          | $\text{BThap}[e] + \text{BThap-L}[e] \leftrightarrow \text{BThp}[e] + \text{BThap}[e]$                                                                                      | -1000 | 1000 | (BT_1375 or BT_1901 or BT_2403)                                                                                                                                                                                                                                | <i>R. shetaiastrum</i> meibohi / transport demand reaction |
| BTASPO1         | $\text{BThb2}[e] + \text{BThap-L}[e] + \text{BTh2ol}[e] \rightarrow \text{BThab}[e] + \text{BThb2ol}[e] + \text{BThaa}[e]$                                                  | 0     | 1000 | BT_3184                                                                                                                                                                                                                                                        | <i>R. shetaiastrum</i> meibohi / transport demand reaction |
| BTASPO5         | $\text{BThab}[e] + \text{BThap-L}[e] \rightarrow \text{BTh}[e] + \text{BThp}[e] + \text{BTh2ol}[e]$                                                                         | 0     | 1000 | BT_3184                                                                                                                                                                                                                                                        | <i>R. shetaiastrum</i> meibohi / transport demand reaction |
| BTASPO6         | $\text{BThap-L}[e] + \text{BTh2ol}[e] \rightarrow \text{BTh}[e] + \text{BThb2ol}[e] + \text{BThap}[e]$                                                                      | 0     | 1000 | BT_3184                                                                                                                                                                                                                                                        | <i>R. shetaiastrum</i> meibohi / transport demand reaction |
| BTASPT          | $\text{BThap-L}[e] \rightarrow \text{BThm}[e] + \text{BThab}[e]$                                                                                                            | 0     | 1000 | BT_2755                                                                                                                                                                                                                                                        | <i>R. shetaiastrum</i> meibohi / transport demand reaction |
| BTASPTA         | $\text{BThab}[e] + \text{BThap-L}[e] \leftrightarrow \text{BThg-L}[e] + \text{BThaa}[e]$                                                                                    | -1000 | 1000 | (BT_3935 or BT_3720 or BT_3375 or BT_0666 or BT_1077 or BT_1476 or BT_3415)                                                                                                                                                                                    | <i>R. shetaiastrum</i> meibohi / transport demand reaction |
| BTASPD2         | $\text{BTh}[e] + \text{BThap-L}[e] \leftrightarrow \text{BTh}[e] + \$                                                                                                       |       |      |                                                                                                                                                                                                                                                                |                                                            |



|             |                                                                                                    |       |      |                                             |                                                                                 |
|-------------|----------------------------------------------------------------------------------------------------|-------|------|---------------------------------------------|---------------------------------------------------------------------------------|
| BTDSNAOT10  | $\neg B7ha2[c] \vee B7ac3p[c] \rightarrow B7hc1 \vee 2 \cdot B7co2[c] \vee B7tp[c] \vee B7dmm1[a]$ | 0     | 1000 |                                             | $R$ <i>Serializability</i> <i>serializable</i> <i>transport demand reaction</i> |
| BTDSNAOT11  | $B7ha2[c] \vee B7ac3p[c] \rightarrow B7hc1 \vee 8 \cdot B7co2[c] \vee B7tp[c] \vee B7dmm1[a]$      | 0     | 1000 |                                             | $R$ <i>Serializability</i> <i>serializable</i> <i>transport demand reaction</i> |
| BTDSNAOT14  | $B7ha2[c] \vee B7ac3p[c] \rightarrow B7hc1 \vee B7co2[c] \vee B7tp[c] \vee B7dmm1[a]$              | 0     | 1000 | (BT_2014 or BT_2015)                        | $R$ <i>Serializability</i> <i>serializable</i> <i>transport demand reaction</i> |
| BTDSNAOT7   | $B7ha2[c] \vee B7ac3p[c] \rightarrow B7hc1 \vee B7co2[c] \vee B7tp[c] \vee B7dmm1[a]$              | 0     | 1000 | (BT_2014 or BT_2015)                        | $R$ <i>Serializability</i> <i>serializable</i> <i>transport demand reaction</i> |
| BTDSNAOT9   | $B7ha2[c] \vee B7ac3p[c] \rightarrow B7hc1 \vee B7co2[c] \vee B7tp[c] \vee B7dmm1[a]$              | 0     | 1000 | (BT_2014 or BT_2015)                        | $R$ <i>Serializability</i> <i>serializable</i> <i>transport demand reaction</i> |
| BTDSINPA    | $B7ha2p[c] \rightarrow B7hc1 \vee B7ac3p[c] \vee B7ah2ap[c]$                                       | 0     | 1000 | BT_2149                                     | $R$ <i>Serializability</i> <i>serializable</i> <i>transport demand reaction</i> |
| BTDSIORdan  | $B7ha2[c] \vee B7ah2c[S] \rightarrow B7hc1[c] \vee B7atoc[c]$                                      | 0     | 1000 | (BT_1009 or BT_1091 and BT_0892)            | $R$ <i>Serializability</i> <i>serializable</i> <i>transport demand reaction</i> |
| BTDSIORda   | $B7ha2[c] \vee B7ah2c[S] \rightarrow B7hc1[c] \vee B7atoc[c]$                                      | 0     | 1000 | (BT_1009 or BT_1091 and BT_0892)            | $R$ <i>Serializability</i> <i>serializable</i> <i>transport demand reaction</i> |
| BTDSIORTS   | $B7ha2[c] \vee B7ah2c[S] \leftrightarrow B7hc1 \vee B7ac3p[c]$                                     | -1000 | 1000 | BT_0250                                     | $R$ <i>Serializability</i> <i>serializable</i> <i>transport demand reaction</i> |
| BTDSHPYA    | $B7ha2[c] \vee B7hc1 \vee B7Z5app[c] \rightarrow B7ha2[c] \vee B7Z5app[c]$                         | 0     | 1000 | BT_3728                                     | $R$ <i>Serializability</i> <i>serializable</i> <i>transport demand reaction</i> |
| BTDSHPB     | $B7ha2[c] \vee B7Zahapp[c] \rightarrow B7ha2[c] \vee B7Zahapp[c]$                                  | 0     | 1000 | BT_3646                                     | $R$ <i>Serializability</i> <i>serializable</i> <i>transport demand reaction</i> |
| BTDSHP33    | $B7ha2apppp[c] \vee B7Zahapp[c] \rightarrow B7tp[c] \vee B7Zahapp[c]$                              | 0     | 1000 | BT_1410                                     | $R$ <i>Serializability</i> <i>serializable</i> <i>transport demand reaction</i> |
| BTDSHQ5     | $B7Zahapp[c] \rightarrow B7tp[c] \vee B7Zahapp[c]$                                                 | 0     | 1000 | BT_3975                                     | $R$ <i>Serializability</i> <i>serializable</i> <i>transport demand reaction</i> |
| BTDSHOT1    | $B7Zahapp[c] \rightarrow B7ha2[c] \vee B7Zahapp[c]$                                                | 0     | 1000 | BT_2842                                     | $R$ <i>Serializability</i> <i>serializable</i> <i>transport demand reaction</i> |
| BTDSINS2    | $B7hc1 \vee B7atoc[c] \rightarrow B7hc1 \vee B7atoc[c]$                                            | 0     | 1000 | BT_4330                                     | $R$ <i>Serializability</i> <i>serializable</i> <i>transport demand reaction</i> |
| BTDSMAT7    | $B7Zapp[c] \vee B7tp[c] \rightarrow B7tp[c] \vee B7Zapp[c]$                                        | 0     | 1000 | (BT_3261 or BT_2058)                        | $R$ <i>Serializability</i> <i>serializable</i> <i>transport demand reaction</i> |
| BTDSMP5     | $B7hc1 \vee B7atoc[c] \rightarrow B7ha2p[c] \rightarrow B7ha2[c] \vee B7atoc[c] \vee B7atocp[c]$   | 0     | 1000 | BT_2061                                     | $R$ <i>Serializability</i> <i>serializable</i> <i>transport demand reaction</i> |
| BTDSMP52    | $B7hc1 \vee B7atocp[c] \rightarrow B7ha2p[c] \rightarrow B7ha2[c] \vee B7atocp[c] \vee B7atoc[c]$  | 0     | 1000 | BT_2061                                     | $R$ <i>Serializability</i> <i>serializable</i> <i>transport demand reaction</i> |
| BTDSMQMT    | $B7atoc[c] \vee B7Zomahp[c] \rightarrow B7hc1[c] \vee B7ac3p[c] \vee B7q8h2[c]$                    | 0     | 1000 | BT_3209                                     | $R$ <i>Serializability</i> <i>serializable</i> <i>transport demand reaction</i> |
| BTDSM_48BA  | $B7ha2[c] \rightarrow$                                                                             | 0     | 1000 |                                             | $R$ <i>Serializability</i> <i>serializable</i> <i>transport demand reaction</i> |
| BTDSM_SIRB  | $B7Zahapp[c] \rightarrow$                                                                          | 0     | 1000 |                                             | $R$ <i>Serializability</i> <i>serializable</i> <i>transport demand reaction</i> |
| BTDSM_AMOB  | $B7amob[c] \rightarrow$                                                                            | 0     | 1000 |                                             | $R$ <i>Serializability</i> <i>serializable</i> <i>transport demand reaction</i> |
| BTDSPCOAK   | $B7atp[c] \vee B7apoc[c] \rightarrow B7hc1[c] \vee B7co2[c] \vee B7adp[c]$                         | 0     | 1000 | BT_4594                                     | $R$ <i>Serializability</i> <i>serializable</i> <i>transport demand reaction</i> |
| BTDSPR      | $B7hc1 \vee B7adp[c] \vee B7Zahp[c] \rightarrow B7adp[c] \vee B7anp[S] \vee B7hc1[c]$              | 0     | 1000 | (BT_2074 or BT_3117)                        | $R$ <i>Serializability</i> <i>serializable</i> <i>transport demand reaction</i> |
| BTDSRKB     | $B7hc1 \vee B7Zahp[c] \vee B7Zahp[c] \rightarrow B7ha2[c] \vee B7ha2p[c]$                          | -1000 | 1000 | (BT_2799 or BT_3576 or BT_2803 and BT_2804) | $R$ <i>Serializability</i> <i>serializable</i> <i>transport demand reaction</i> |
| BTDSRPA     | $B7Zahp[c] \leftrightarrow B7ac3p[c] \vee B7Zhp[c]$                                                | -1000 | 1000 | (BT_3263 or BT_4425)                        | $R$ <i>Serializability</i> <i>serializable</i> <i>transport demand reaction</i> |
| BTDS7SISU2K | $B7hc1 \vee B7Zahapp[c] \leftrightarrow B7hc1 \vee B7Zahapp[c]$                                    | -1000 | 1000 | BT_4105                                     | $R$ <i>Serializability</i> <i>serializable</i> <i>transport demand reaction</i> |
| BTDS7MPK    | $B7atp[c] \vee B7atpoc[c] \leftrightarrow B7adp[c] \vee B7ahp[c]$                                  | -1000 | 1000 |                                             | $R$ <i>Serializability</i> <i>serializable</i> <i>transport demand reaction</i> |
| BTDS7R1K1   | $B7atp[c] \vee B7atoc[c] \rightarrow B7hc1 \vee B7adp[c] \vee B7atpoc[c]$                          | 0     | 1000 | BT_2275                                     | $R$ <i>Serializability</i> <i>serializable</i> <i>transport demand reaction</i> |
| BTDS7R1PP   | $B7tp[c] \vee B7atoc[c] \leftrightarrow B7Zahp[c] \vee B7atoc[c]$                                  | -1000 | 1000 | (BT_1881 or BT_4554)                        | $R$ <i>Serializability</i> <i>serializable</i> <i>transport demand reaction</i> |
| BTDS7R1R2   | $B7hc1 \vee B7atoc[c] \rightarrow B7hc1 \vee B7atoc[c]$                                            | 0     | 1000 | BT_4330                                     | $R$ <i>Serializability</i> <i>serializable</i> <i>transport demand reaction</i> |
| BTDS7T1P    | $B7ha2[c] \vee B7atp[c] \rightarrow B7hc1 \vee B7tp[c] \vee B7atpoc[c]$                            | 0     | 1000 | (BT_3461 or BT_4350)                        | $R$ <i>Serializability</i> <i>serializable</i> <i>transport demand reaction</i> |
| BTDSAPR8    | $B7hc1 \vee B7atpoc[c] \vee B7Zahp[c] \rightarrow B7adp[c] \vee B7Zahp[c]$                         | 0     | 1000 | BT_2002                                     | $R$ <i>Serializability</i> <i>serializable</i> <i>transport demand reaction</i> |
| BTDSNPS     | $B7hc1 \vee B7tp[c] \vee B7Zhp[c] \rightarrow B7co2[c] \vee B7Zahp[c]$                             | 0     | 1000 | (BT_1403 or BT_4099)                        | $R$ <i>Serializability</i> <i>serializable</i> <i>transport demand reaction</i> |
|             |                                                                                                    |       |      |                                             |                                                                                 |

|                       |                                                                                                                               |       |      |                                                                                                                                                                                                                                                                                                                                                                                                                         |                                                                 |
|-----------------------|-------------------------------------------------------------------------------------------------------------------------------|-------|------|-------------------------------------------------------------------------------------------------------------------------------------------------------------------------------------------------------------------------------------------------------------------------------------------------------------------------------------------------------------------------------------------------------------------------|-----------------------------------------------------------------|
| BTBRA                 | $BTb4p[e] \Leftrightarrow BTb4p[e] + BTg3p[e]$                                                                                | -1000 | 1000 | (BT_1106 or BT_1659 or BT_1691)                                                                                                                                                                                                                                                                                                                                                                                         | <i>R. thetaiotaomicron</i> metabolite/transport demand reaction |
| BTBRA2                | $BTb1p[e] \Leftrightarrow BTg4a4[e] + BTb4p[e]$                                                                               | -1000 | 1000 | (BT_1106 or BT_1659 or BT_1691)                                                                                                                                                                                                                                                                                                                                                                                         | <i>R. thetaiotaomicron</i> metabolite/transport demand reaction |
| BTBRA3                | $BTs17b[e] \Leftrightarrow BTb4p[e] + BTs4p[e]$                                                                               | -1000 | 1000 | (BT_1106 or BT_1659 or BT_1691)                                                                                                                                                                                                                                                                                                                                                                                         | <i>R. thetaiotaomicron</i> metabolite/transport demand reaction |
| BTBFP                 | $BTb2a[e] + BTb4p[e] \rightarrow BTp[e] + BTb6p[e]$                                                                           | 0     | 1000 | BT_1228                                                                                                                                                                                                                                                                                                                                                                                                                 | <i>R. thetaiotaomicron</i> metabolite/transport demand reaction |
| BTFC1                 | $BTb6c-L[e] \Leftrightarrow BTb3c-L[e]$                                                                                       | -1000 | 1000 | BT_1273                                                                                                                                                                                                                                                                                                                                                                                                                 | <i>R. thetaiotaomicron</i> metabolite/transport demand reaction |
| BTCLK                 | $BTap[e] + BTb4-L[e] \rightarrow BTb[e] + BTb4p[e] + BTb3p[e]$                                                                | 0     | 1000 | BT_1275                                                                                                                                                                                                                                                                                                                                                                                                                 | <i>R. thetaiotaomicron</i> metabolite/transport demand reaction |
| BTCLPA                | $BTb3c[e] \Leftrightarrow BTb4p[e] + BTb4-L[e]$                                                                               | -1000 | 1000 | BT_1274                                                                                                                                                                                                                                                                                                                                                                                                                 | <i>R. thetaiotaomicron</i> metabolite/transport demand reaction |
| BTFNADOX              | $BTb4a[e] + BTb4a[e] \Leftrightarrow BTb[e] + BTb4a[e] + BTb4a[e]$                                                            | -1000 | 1000 |                                                                                                                                                                                                                                                                                                                                                                                                                         | <i>R. thetaiotaomicron</i> metabolite/transport demand reaction |
| BTFLab                | $BTb2a[e] + BTap[e] + BTb2[e] \rightarrow BTb[e] + BTp[e] + BTb4p[e] + BTb3c[e]$                                              | 0     | 1000 | (BT_1592 or BT_2098 and BT_2099) or (BT_1950 and BT_1952)                                                                                                                                                                                                                                                                                                                                                               | <i>R. thetaiotaomicron</i> metabolite/transport demand reaction |
| BTFECDTAb             | $BTb2a[e] + BTap[e] + BTb3a[e] \rightarrow BTb[e] + BTp[e] + BTap[e] + 2 BTb3c[e] + BTb3c[e]$                                 | 0     | 1000 | BT_1951                                                                                                                                                                                                                                                                                                                                                                                                                 | <i>R. thetaiotaomicron</i> metabolite/transport demand reaction |
| BTFLab                | $BTb2a[e] + BTap[e] + BTb3a[e] \rightarrow BTb[e] + BTp[e] + BTb4p[e] + BTb3c[e]$                                             | 0     | 1000 | ((BT_2098 and BT_2099) or (BT_1950 and BT_1952))                                                                                                                                                                                                                                                                                                                                                                        | <i>R. thetaiotaomicron</i> metabolite/transport demand reaction |
| BTFLCAb               | $BTb2a[e] + BTap[e] + 2 BTb3a[e] + BTb3e[e] \rightarrow BTb[e] + BTp[e] + BTb4p[e] + 2 BTb3c[e] + BTb3c[e]$                   | 0     | 1000 | BT_1951                                                                                                                                                                                                                                                                                                                                                                                                                 | <i>R. thetaiotaomicron</i> metabolite/transport demand reaction |
| BTFR2                 | $4 BTb[e] + BTb2[e] + 4 BTb2[e] \rightarrow 2 BTb2a[e] + 4 BTb3e[e]$                                                          | 0     | 1000 | BT_4715                                                                                                                                                                                                                                                                                                                                                                                                                 | <i>R. thetaiotaomicron</i> metabolite/transport demand reaction |
| BTFK                  | $BTap[e] + BTb6c-L[e] \rightarrow BTb[e] + BTb4p[e] + BTb3c-L[e]$                                                             | 0     | 1000 | BT_2128                                                                                                                                                                                                                                                                                                                                                                                                                 | <i>R. thetaiotaomicron</i> metabolite/transport demand reaction |
| BTMNAT                | $BTb[e] + BTap[e] + BTb4a[e] \rightarrow BTp[e] + BTb4a[e]$                                                                   | 0     | 1000 | BT_2543                                                                                                                                                                                                                                                                                                                                                                                                                 | <i>R. thetaiotaomicron</i> metabolite/transport demand reaction |
| BTOLD3                | $BTb4a[e] + BTb4a4a[e] \rightarrow BTp[e] + BTb4a[e]$                                                                         | 0     | 1000 | BT_3646                                                                                                                                                                                                                                                                                                                                                                                                                 | <i>R. thetaiotaomicron</i> metabolite/transport demand reaction |
| BTOLR                 | $2 BTb4p[e] + BTb4a[e] \Leftrightarrow BTb[e] + 2 BTb4p[e] + BTb3c[e]$                                                        | -1000 | 1000 | (BT_0106 or BT_2048)                                                                                                                                                                                                                                                                                                                                                                                                    | <i>R. thetaiotaomicron</i> metabolite/transport demand reaction |
| BTOLA                 | $BTb[e] + BTb4a[e] \Leftrightarrow BTb[e] + BTb4a[e]$                                                                         | -1000 | 1000 |                                                                                                                                                                                                                                                                                                                                                                                                                         | <i>R. thetaiotaomicron</i> metabolite/transport demand reaction |
| BTOMETR               | $BTb[e] + BTb4a[e] \Leftrightarrow BTb2a[e] + BTb4a[e]$                                                                       | -1000 | 1000 | BT_4584                                                                                                                                                                                                                                                                                                                                                                                                                 | <i>R. thetaiotaomicron</i> metabolite/transport demand reaction |
| BTOR                  | $BTb[e] \Leftrightarrow BTb4a[e]$                                                                                             | 0     | 1000 |                                                                                                                                                                                                                                                                                                                                                                                                                         | <i>R. thetaiotaomicron</i> metabolite/transport demand reaction |
| BTORG7                | $4 BTb3c-L[e] + 4 BTap[e] + BTb10a[e] \rightarrow 4 BTb[e] + 4 BTp[e] + 4 BTb4a[e] + BTb10a[e]$                               | 0     | 1000 | BT_1335                                                                                                                                                                                                                                                                                                                                                                                                                 | <i>R. thetaiotaomicron</i> metabolite/transport demand reaction |
| BTORG_m               | $BTb3c-L[e] + BTap[e] + BTb4a[e] \rightarrow BTb[e] + BTp[e] + BTb4a[e] + BTb4a[e]$                                           | 0     | 1000 | BT_1335                                                                                                                                                                                                                                                                                                                                                                                                                 | <i>R. thetaiotaomicron</i> metabolite/transport demand reaction |
| BTORD0                | $BTb4a[e] + BTb4a4a[e] \rightarrow BTb4a[e] + BTb4a4a[e]$                                                                     | 0     | 1000 | (BT_3054 and BT_3055)                                                                                                                                                                                                                                                                                                                                                                                                   | <i>R. thetaiotaomicron</i> metabolite/transport demand reaction |
| BTORD1                | $BTb4a[e] + BTb4a4a[e] \rightarrow BTb4a[e] + BTb4a4a[e]$                                                                     | 0     | 1000 | (BT_3054 and BT_3055)                                                                                                                                                                                                                                                                                                                                                                                                   | <i>R. thetaiotaomicron</i> metabolite/transport demand reaction |
| BTORD2                | $BTb4a[e] + BTb4a4a[e] \rightarrow BTb4a[e] + BTb4a4a[e]$                                                                     | 0     | 1000 | (BT_3054 and BT_3055)                                                                                                                                                                                                                                                                                                                                                                                                   | <i>R. thetaiotaomicron</i> metabolite/transport demand reaction |
| BTORD3                | $BTb4a[e] + BTb4a4a4a[e] \rightarrow BTb4a[e] + BTb4a4a[e]$                                                                   | 0     | 1000 | (BT_3054 and BT_3055)                                                                                                                                                                                                                                                                                                                                                                                                   | <i>R. thetaiotaomicron</i> metabolite/transport demand reaction |
| BTORD8                | $BTb4a[e] + BTb4a4a[e] \rightarrow BTb4a[e] + BTb4a4a[e]$                                                                     | 0     | 1000 | (BT_3054 and BT_3055)                                                                                                                                                                                                                                                                                                                                                                                                   | <i>R. thetaiotaomicron</i> metabolite/transport demand reaction |
| BTORD9                | $BTb4a[e] + BTb4a4a[e] \rightarrow BTb4a[e] + BTb4a4a[e]$                                                                     | 0     | 1000 | (BT_3054 and BT_3055)                                                                                                                                                                                                                                                                                                                                                                                                   | <i>R. thetaiotaomicron</i> metabolite/transport demand reaction |
| BTORTT                | $BTb4p[e] + BTb4p[e] \rightarrow BTp[e] + BTb4p[e]$                                                                           | 0     | 1000 | (BT_3261 or BT_2058)                                                                                                                                                                                                                                                                                                                                                                                                    | <i>R. thetaiotaomicron</i> metabolite/transport demand reaction |
| BTFLASE3              | $BTb2a[e] + BTb4a4a[e] \rightarrow 2 BTb[e]$                                                                                  | 0     | 1000 | BT_1765                                                                                                                                                                                                                                                                                                                                                                                                                 | <i>R. thetaiotaomicron</i> metabolite/transport demand reaction |
| BTFLU2                | $BTb[e] + BTb4a[e] \Leftrightarrow BTb[e] + BTb4a[e]$                                                                         | -1000 | 1000 | BT_1758                                                                                                                                                                                                                                                                                                                                                                                                                 | <i>R. thetaiotaomicron</i> metabolite/transport demand reaction |
| BTFLCD_r              | $2 BTb[e] + BTb4a4a[e] \Leftrightarrow BTb4a[e] + BTb4a4a[e]$                                                                 | -1000 | 1000 | BT_2691                                                                                                                                                                                                                                                                                                                                                                                                                 | <i>R. thetaiotaomicron</i> metabolite/transport demand reaction |
| BTFLHCL               | $BTap[e] + BTb4a[e] \rightarrow BTp[e] + BTb4a[e] + BTb4a4a[e]$                                                               | 0     | 1000 | BT_4258                                                                                                                                                                                                                                                                                                                                                                                                                 | <i>R. thetaiotaomicron</i> metabolite/transport demand reaction |
| BTFLHFD               | $BTb2a[e] + BTb10a4a[e] \rightarrow BTb[e] + BTb4a[e] + BTb3c[e]$                                                             | 0     | 1000 | BT_1381                                                                                                                                                                                                                                                                                                                                                                                                                 | <i>R. thetaiotaomicron</i> metabolite/transport demand reaction |
| BTFLHFL               | $BTap[e] + BTb4a[e] + BTb3c[e] \rightarrow BTp[e] + BTb4p[e] + BTb10a4a[e]$                                                   | 0     | 1000 | BT_6737                                                                                                                                                                                                                                                                                                                                                                                                                 | <i>R. thetaiotaomicron</i> metabolite/transport demand reaction |
| BTFLASLr              | $BTb2a[e] + BTb2a2a2a2a[e] \rightarrow BTb4c-L[e] + BTb2a2a2a2a[e]$                                                           | 0     | 1000 | (BT_1842 or BT_2970 or BT_3665)                                                                                                                                                                                                                                                                                                                                                                                         | <i>R. thetaiotaomicron</i> metabolite/transport demand reaction |
| BTFCUNELNACNHX_DEG    | $8 BTb2a[e] + 2 BTb4a4a4a4a[e] \rightarrow 2 BTb4c-L[e] + 2 BTa4a4a[e] + 2 BTa4a4a[e] + 2 BTa4a[e] + BTa4a4a[e] + BTa4a4a[e]$ | 0     | 1000 | ((BT_1625 or BT_4136) and (BT_0455 or BT_2194 or BT_2892) and (BT_1626 or BT_0461) and (BT_1627 or BT_1632 or BT_4132 or BT_0459 or BT_0460 or BT_1038 or BT_1044 or BT_1048 or BT_1051 or BT_4258 or BT_2825) and (BT_1630 and BT_1631) or (BT_4134 and BT_4135) or (BT_1039 and BT_1040) or (BT_1042 and BT_1043) or (BT_1046 and BT_1047) or (BT_4257 or BT_4258) or (BT_2818 and BT_2819) or (BT_2820 and BT_2821)) | <i>R. thetaiotaomicron</i> metabolite/transport demand reaction |
| BTFCU                 | $BTb4c-L[e] + BTb[e] \Leftrightarrow BTb[e] + BTb4c-L[e]$                                                                     | -1000 | 1000 | (BT_1277 or BT_3616)                                                                                                                                                                                                                                                                                                                                                                                                    | <i>R. thetaiotaomicron</i> metabolite/transport demand reaction |
| BTFLM                 | $BTb2a[e] + BTb4a[e] \Leftrightarrow BTb4a-L[e]$                                                                              | -1000 | 1000 | BT_2256                                                                                                                                                                                                                                                                                                                                                                                                                 | <i>R. thetaiotaomicron</i> metabolite/transport demand reaction |
| BTFLM2r               | $BTb[e] + BTb4a[e] \Leftrightarrow BTb[e] + BTb4a[e]$                                                                         | -1000 | 1000 | BT_2756                                                                                                                                                                                                                                                                                                                                                                                                                 | <i>R. thetaiotaomicron</i> metabolite/transport demand reaction |
| BTGPACT               | $BTa4a4a[e] + BTa4a4a[e] \rightarrow BTb[e] + BTa4a[e] + BTa4a4a[e]$                                                          | 0     | 1000 |                                                                                                                                                                                                                                                                                                                                                                                                                         | <i>R. thetaiotaomicron</i> metabolite/transport demand reaction |
| BTGPACT               | $BTb[e] + BTp[e] + BTg3p[e] \Leftrightarrow BTp[e] + BTg3p[e]$                                                                | -1000 | 1000 | BT_1351                                                                                                                                                                                                                                                                                                                                                                                                                 | <i>R. thetaiotaomicron</i> metabolite/transport demand reaction |
| BTGPFTT               | $BTb[e] + BTb4p[e] + BTg3p[e] \rightarrow BTp[e] + BTb4p[e]$                                                                  | 0     | 1000 | (BT_0463 or BT_2017)                                                                                                                                                                                                                                                                                                                                                                                                    | <i>R. thetaiotaomicron</i> metabolite/transport demand reaction |
| BTGPAT120             | $BTb4a4a4a[e] + BTg3c3p[e] \rightarrow BTACp[e] + BTb4a4a4a[e]$                                                               | 0     | 1000 |                                                                                                                                                                                                                                                                                                                                                                                                                         | <i>R. thetaiotaomicron</i> metabolite/transport demand reaction |
| BTGPAT140             | $BTb4a4a4a[e] + BTg3c3p[e] \rightarrow BTACp[e] + BTb4a4a4a[e]$                                                               | 0     | 1000 |                                                                                                                                                                                                                                                                                                                                                                                                                         | <i>R. thetaiotaomicron</i> metabolite/transport demand reaction |
| BTGPAT160             | $BTb4a4a4a[e] + BTg3c3p[e] \rightarrow BTACp[e] + BTb4a4a4a[e]$                                                               | 0     | 1000 |                                                                                                                                                                                                                                                                                                                                                                                                                         | <i>R. thetaiotaomicron</i> metabolite/transport demand reaction |
| BTGPAT180             | $BTb4a4a4a[e] + BTg3c3p[e] \rightarrow BTACp[e] + BTb4a4a4a[e]$                                                               | 0     | 1000 |                                                                                                                                                                                                                                                                                                                                                                                                                         | <i>R. thetaiotaomicron</i> metabolite/transport demand reaction |
| BTGPAT181             | $BTb4a4a4a[e] + BTg3c3p[e] \rightarrow BTACp[e] + BTb4a4a4a[e]$                                                               | 0     | 1000 |                                                                                                                                                                                                                                                                                                                                                                                                                         | <i>R. thetaiotaomicron</i> metabolite/transport demand reaction |
| BTGPAT185             | $BTb[e] + BTa4a4a4a[e] + BTg3c3p[e] \rightarrow BTa4a4a4a[e] + BTa4a4a4a[e]$                                                  | 0     | 1000 |                                                                                                                                                                                                                                                                                                                                                                                                                         | <i>R. thetaiotaomicron</i> metabolite/transport demand reaction |
| BTGPAT17              | $BTb4a4a4a[e] + BTg3c3p[e] \rightarrow BTa4a4a4a[e] + BTb4a4a4a[e]$                                                           | 0     | 1000 |                                                                                                                                                                                                                                                                                                                                                                                                                         | <i>R. thetaiotaomicron</i> metabolite/transport demand reaction |
| BTGPAT14              | $BTb[e] + BTa4a4a4a[e] + BTg3c3p[e] \rightarrow BTa4a4a4a[e] + BTb4a4a4a[e]$                                                  | 0     | 1000 |                                                                                                                                                                                                                                                                                                                                                                                                                         | <i>R. thetaiotaomicron</i> metabolite/transport demand reaction |
| BTGPAT15              | $BTb[e] + BTa4a4a4a[e] + BTg3c3p[e] \rightarrow BTa4a4a4a[e] + BTb4a4a4a[e]$                                                  | 0     | 1000 |                                                                                                                                                                                                                                                                                                                                                                                                                         | <i>R. thetaiotaomicron</i> metabolite/transport demand reaction |
| BTGPAT16              | $BTb[e] + BTa4a4a4a[e] + BTg3c3p[e] \rightarrow BTa4a4a4a[e] + BTb4a4a4a[e]$                                                  | 0     | 1000 |                                                                                                                                                                                                                                                                                                                                                                                                                         | <i>R. thetaiotaomicron</i> metabolite/transport demand reaction |
| BTGPAT17              | $BTb4a4a4a[e] + BTg3c3p[e] \rightarrow BTa4a4a4a[e] + BTb4a4a4a[e]$                                                           | 0     | 1000 |                                                                                                                                                                                                                                                                                                                                                                                                                         | <i>R. thetaiotaomicron</i> metabolite/transport demand reaction |
| BTGPFD1               | $BTb4a[e] + BTg3c3p[e] \Leftrightarrow BTb[e] + BTb4a[e] + BTb4p[e]$                                                          | -1000 | 1000 | BT_2123                                                                                                                                                                                                                                                                                                                                                                                                                 | <i>R. thetaiotaomicron</i> metabolite/transport demand reaction |
| BTGSADs               | $BTb4a4a[e] \Leftrightarrow BTb2a[e] + BTb[e] + BTg3p[e]$                                                                     | -1000 | 1000 |                                                                                                                                                                                                                                                                                                                                                                                                                         | <i>R. thetaiotaomicron</i> metabolite/transport demand reaction |
| BTGSd                 | $BTb[e] + BTb4a4a[e] + BTg3p[e] \rightarrow BTb4a[e] + BTp[e] + BTb4a4a[e]$                                                   | 0     | 1000 | BT_3718                                                                                                                                                                                                                                                                                                                                                                                                                 | <i>R. thetaiotaomicron</i> metabolite/transport demand reaction |
| BTGPRDH               | $BTb4p[e] + BTg3p-B[e] \Leftrightarrow BTb4a[e] + BTa4p[e] + BTg3p[e]$                                                        | -1000 | 1000 | BT_1221                                                                                                                                                                                                                                                                                                                                                                                                                 | <i>R. thetaiotaomicron</i> metabolite/transport demand reaction |
| BTGPDA                | $BTb2a[e] + BTa4a4p[e] \rightarrow BTb4a[e] + BTb4p[e]$                                                                       | 0     | 1000 | (BT_0258 or BT_3587 or BT_3601 or BT_4127)                                                                                                                                                                                                                                                                                                                                                                              | <i>R. thetaiotaomicron</i> metabolite/transport demand reaction |
| BTGPDMr               | $BTb4a4a[e] + BTp[e] \Leftrightarrow BTb[e] + BTb4a4a[e] + BTb4p[e]$                                                          | -1000 | 1000 | BT_1221                                                                                                                                                                                                                                                                                                                                                                                                                 | <i>R. thetaiotaomicron</i> metabolite/transport demand reaction |
| BTGPR                 | $BTg3p[e] \Leftrightarrow BTg3p-B[e]$                                                                                         | -1000 | 1000 | BT_2124                                                                                                                                                                                                                                                                                                                                                                                                                 | <i>R. thetaiotaomicron</i> metabolite/transport demand reaction |
| BTGPR1                | $BTg3p-B[e] \Leftrightarrow BTb4p[e]$                                                                                         | -1000 | 1000 | BT_2124                                                                                                                                                                                                                                                                                                                                                                                                                 | <i>R. thetaiotaomicron</i> metabolite/transport demand reaction |
| BTGACPCD              | $BTb[e] + BTb4a4a4a[e] + BTg3a4a4a[e] \rightarrow BTACp[e] + BTb4a4a4a[e] + BTg3a4a4a[e]$                                     | 0     | 1000 | BT_3358                                                                                                                                                                                                                                                                                                                                                                                                                 | <i>R. thetaiotaomicron</i> metabolite/transport demand reaction |
| BTGALAM6FDA           | $BTb2a[e] + BTg4a4a4a[e] \rightarrow BTb4a[e] + BTg4p-B[e]$                                                                   | 0     | 1000 |                                                                                                                                                                                                                                                                                                                                                                                                                         | <i>R. thetaiotaomicron</i> metabolite/transport demand reaction |
| BTGALAMr              | $BTb[e] + BTg4a4a[e] \Leftrightarrow BTb[e] + BTg4a4a[e]$                                                                     | -1000 | 1000 |                                                                                                                                                                                                                                                                                                                                                                                                                         | <i>R. thetaiotaomicron</i> metabolite/transport demand reaction |
| BTGALASE1e            | $2 BTb2a[e] + BTb2a2a2a2a[e] \rightarrow BTb2a2a2a2a[e] + 2 BTa4a[e]$                                                         | 0     | 1000 | (BT_0290 or BT_0461 or BT_0757 or BT_0983 or BT_0992 or BT_0993 or BT_0996 or BT_1626 or BT_2190 or BT_2880 or BT_2922 or BT_2969 or BT_3092 or BT_3114 or BT_3179 or BT_3293 or BT_3340 or BT_3513 or BT_3654 or BT_4050 or BT_4152 or BT_4156 or BT_4160 or BT_4181 or BT_4241 or BT_4667 or BT_4684)                                                                                                                 | <i>R. thetaiotaomicron</i> metabolite/transport demand reaction |
| BTGALASE_Hs           | $2 BTb2a[e] + BTb2a2a2a2a[e] \rightarrow 2 BTa4a[e] + BTb2a2a2a2a[e]$                                                         | 0     | 1000 | (BT_0290 or BT_0461 or BT_0757 or BT_0983 or BT_0992 or BT_0993 or BT_0996 or BT_1626 or BT_2190 or BT_2880 or BT_2922 or BT_2969 or BT_3092 or BT_3114 or BT_3179 or BT_3293 or BT_3340 or BT_3513 or BT_3654 or BT_4050 or BT_4152 or BT_4156 or BT_4160 or BT_4181 or BT_4241 or BT_4667 or BT_4684)                                                                                                                 | <i>R. thetaiotaomicron</i> metabolite/transport demand reaction |
| BTGALASE_OGLYCAN1e    | $BTb2a[e] + BTb4a[e] \rightarrow BTa4a[e] + BTb4a4a[e]$                                                                       | 0     | 1000 | BT_4241 and BT_4246 and BT_4247                                                                                                                                                                                                                                                                                                                                                                                         | <i>R. thetaiotaomicron</i> metabolite/transport demand reaction |
| BTGALASE_OGLYCAN2e    | $BTb2a[e] + BTb_4a4a4a[e] \rightarrow BTa4a[e] + BTb_4a4a4a[e]$                                                               | 0     | 1000 | BT_4241 and BT_4246 and BT_4247                                                                                                                                                                                                                                                                                                                                                                                         | <i>R. thetaiotaomicron</i> metabolite/transport demand reaction |
| BTGALASE_OGLYCAN3e    | $BTb2a[e] + BTb4a4a4a[e] \rightarrow BTa4a[e] + BTb_4a4a4a[e]$                                                                | 0     | 1000 | BT_4241 and BT_4246 and BT_4247                                                                                                                                                                                                                                                                                                                                                                                         | <i>R. thetaiotaomicron</i> metabolite/transport demand reaction |
| BTGALK                | $BTap[e] + BTg3a[e] \rightarrow BTb[e] + BTa4p[e] + BTg3a4p[e]$                                                               | 0     | 1000 | BT_0370                                                                                                                                                                                                                                                                                                                                                                                                                 | <i>R. thetaiotaomicron</i> metabolite/transport demand reaction |
| BTGALMr               | $BTg3a-B[e] \Leftrightarrow BTg3a-D[e]$                                                                                       | -1000 | 1000 | (BT_0372 or BT_0356 or BT_2849 or BT_3529 or BT_3532)                                                                                                                                                                                                                                                                                                                                                                   | <i>R. thetaiotaomicron</i> metabolite/transport demand reaction |
| BTGALNACASE_OGLYCAN1e | $BTb2a[e] + BTb_4a4a4a[e] \rightarrow BTa4a[e] + BTb_4a4a4a[e]$                                                               | 0     | 1000 | BT_0065                                                                                                                                                                                                                                                                                                                                                                                                                 | <i>R. thetaiotaomicron</i> metabolite/transport demand reaction |
| BTGALNACASE_OGLYCAN2e | $BTb2a[e] + BTb4a4a[e] \rightarrow BTa4a[e] + BTb_4a4a4a[e]$                                                                  | 0     | 1000 | BT_0065                                                                                                                                                                                                                                                                                                                                                                                                                 | <i>R. thetaiotaomicron</i> metabolite/transport demand reaction |
| BTGALNACASE_OGLYCAN3e | $BTb2a[e] + BTb4a4a4a[e] \rightarrow BTa4a[e] + BTb_4a4a4a[e]$                                                                | 0     | 1000 | BT_0065                                                                                                                                                                                                                                                                                                                                                                                                                 | <i>R. thetaiotaomicron</i> metabolite/transport demand reaction |
| BTGALOX               | $BTb2a[e] + BTb2a[e] + BTg3a[e] \Leftrightarrow BTb[e] + BTb2a2a[e] + BTb4a4a[e]$                                             | -1000 | 1000 | BT_4040 or BT_4632                                                                                                                                                                                                                                                                                                                                                                                                      | <i>R. thetaiotaomicron</i> metabolite/transport demand reaction |

|                       |                                                                                         |       |      |                                                                                                                                                                                                                                                                                                                                                                                                                                                                |                                                                 |
|-----------------------|-----------------------------------------------------------------------------------------|-------|------|----------------------------------------------------------------------------------------------------------------------------------------------------------------------------------------------------------------------------------------------------------------------------------------------------------------------------------------------------------------------------------------------------------------------------------------------------------------|-----------------------------------------------------------------|
| BTGALS3               | $BTb2o[c] + BTaueh[c] \rightarrow BTgk-D[e] + BTgpk[c]$                                 | 0     | 1000 | (BT_1871 or BT_2851 or BT_3065 or BT_3131 or BT_3133 or BT_3410)                                                                                                                                                                                                                                                                                                                                                                                               | <i>R. thermotomacron</i> metabolite/ transport/ demand reaction |
| BTGALL3R2r            | $BTn[c] + BTgpk[c] \leftrightarrow BTn[e] + BTgpk[e]$                                   | -1000 | 1000 | BT_4105                                                                                                                                                                                                                                                                                                                                                                                                                                                        | <i>R. thermotomacron</i> metabolite/ transport/ demand reaction |
| BTGALL3               | $BTn[c] + BTap[c] + BTgpk[c] \rightarrow BTpp[c] + BTgpk[e]$                            | 0     | 1000 |                                                                                                                                                                                                                                                                                                                                                                                                                                                                | <i>R. thermotomacron</i> metabolite/ transport/ demand reaction |
| BTGAL2_2              | $BTn[e] + BTgpk[e] \leftrightarrow BTn[c] + BTgpk[c]$                                   | -1000 | 1000 | (BT_3589 or BT_1758 or BT_0371 or BT_4311 or BT_4653)                                                                                                                                                                                                                                                                                                                                                                                                          | <i>R. thermotomacron</i> metabolite/ transport/ demand reaction |
| BTGAM2TASE_H81        | $2\ BTb2o[c] + BTgum2o[c] \rightarrow BTn[e] + 2\ BTa4o[e] + BTgum[e]$                  | 0     | 1000 | (BT_1624 and BT_0238) or (BT_3796 and BT_0238)                                                                                                                                                                                                                                                                                                                                                                                                                 | <i>R. thermotomacron</i> metabolite/ transport/ demand reaction |
| BTGAM2TASE_H82        | $2\ BTb2o[c] + BTgpg\_deg\_5[e] \rightarrow 2\ BTn[e] + 2\ BTa4o[e] + BTgpg\_deg\_6[e]$ | 0     | 1000 | (BT_1624 and BT_0238) or (BT_3796 and BT_0238)                                                                                                                                                                                                                                                                                                                                                                                                                 | <i>R. thermotomacron</i> metabolite/ transport/ demand reaction |
| BTGAM2TASE_H83        | $BTb2o[c] + BTgpg\_deg\_11[e] \rightarrow BTn[e] + 2\ BTa4o[e] + BTgpg\_deg\_11[e]$     | 0     | 1000 | (BT_1624 and BT_0238) or (BT_3796 and BT_0238)                                                                                                                                                                                                                                                                                                                                                                                                                 | <i>R. thermotomacron</i> metabolite/ transport/ demand reaction |
| BTGAM2r               | $BTn[c] + BTgum[c] \leftrightarrow BTn[e] + BTgum[e]$                                   | -1000 | 1000 |                                                                                                                                                                                                                                                                                                                                                                                                                                                                | <i>R. thermotomacron</i> metabolite/ transport/ demand reaction |
| BTGAPD                | $BTpk[c] + BTaueh[c] + BTgpk[c] \leftrightarrow BTn[c] + BTaueh[c] + BT13gpk[c]$        | -1000 | 1000 | BT_4263                                                                                                                                                                                                                                                                                                                                                                                                                                                        | <i>R. thermotomacron</i> metabolite/ transport/ demand reaction |
| BTGARFT1              | $BT10n[c] + BTgpc[c] \rightarrow BTn[c] + BTn[e] + BTgum[c]$                            | 0     | 1000 | (BT_2883 or BT_3360)                                                                                                                                                                                                                                                                                                                                                                                                                                           | <i>R. thermotomacron</i> metabolite/ transport/ demand reaction |
| BTGARF                | $BTap[c] + BTn[c] + BTgpc[c] \rightarrow BTn[c] + BTpk[c] + BTadp[c] + BTgum[c]$        | 0     | 1000 | BT_0704                                                                                                                                                                                                                                                                                                                                                                                                                                                        | <i>R. thermotomacron</i> metabolite/ transport/ demand reaction |
| BTGCCa                | $BTn[c] + BTgk[c] + BTpco[c] \rightarrow BTco2[c] + BTgpk[c]$                           | 0     | 1000 | BT_1147                                                                                                                                                                                                                                                                                                                                                                                                                                                        | <i>R. thermotomacron</i> metabolite/ transport/ demand reaction |
| BTGCCb                | $BTn[c] + BTgpk[c] \rightarrow BTn[e] + BTgpk[e] + BTn[e] + BTgpk[e]$                   | 0     | 1000 | (BT_2519 and BT_4584)                                                                                                                                                                                                                                                                                                                                                                                                                                          | <i>R. thermotomacron</i> metabolite/ transport/ demand reaction |
| BTGCCc                | $BTn[e] + BTgpk[c] \rightarrow BTn[c] + BTaueh[c] + BTpco[c]$                           | 0     | 1000 | (BT_2519 or BT_3186 or BT_1147 and BT_2519)                                                                                                                                                                                                                                                                                                                                                                                                                    | <i>R. thermotomacron</i> metabolite/ transport/ demand reaction |
| BTGCHOLAH             | $BTb2o[c] + BTgpk[c] \rightarrow BTn[c] + BTaueh[c] + BTgpk[c]$                         | 0     | 1000 | (BT_1259 or BT_2086)                                                                                                                                                                                                                                                                                                                                                                                                                                           | <i>R. thermotomacron</i> metabolite/ transport/ demand reaction |
| BTGCHOLAg2            | $2\ BTn[e] + BTgpk[c] \rightarrow 2\ BTn[c] + BTgpk[c]$                                 | 0     | 1000 |                                                                                                                                                                                                                                                                                                                                                                                                                                                                | <i>R. thermotomacron</i> metabolite/ transport/ demand reaction |
| BTGCRPTAr             | $BTgk-L[c] + BTgpk[c] \leftrightarrow BTgk-L[c] + BTgum[c]$                             | -1000 | 1000 | BT_0554                                                                                                                                                                                                                                                                                                                                                                                                                                                        | <i>R. thermotomacron</i> metabolite/ transport/ demand reaction |
| BTGFCUS               | $BTn[c] + BTadp[c] + BTgpk[c] \rightarrow BTgum[c] + BTgpk[c]$                          | 0     | 1000 | BT_1225                                                                                                                                                                                                                                                                                                                                                                                                                                                        | <i>R. thermotomacron</i> metabolite/ transport/ demand reaction |
| BTGGT                 | $BTgpk[c] + BTgpk[c] \rightarrow BTpp[c] + BTpend[c]$                                   | 0     | 1000 | (BT_3261 or BT_2058)                                                                                                                                                                                                                                                                                                                                                                                                                                           | <i>R. thermotomacron</i> metabolite/ transport/ demand reaction |
| BTGBMTz               | $BTn[c] + BTn-L[c] \leftrightarrow BTn[c] + BTgk[c] + BTn[e] + BTn[e]$                  | -1000 | 1000 | BT_0738                                                                                                                                                                                                                                                                                                                                                                                                                                                        | <i>R. thermotomacron</i> metabolite/ transport/ demand reaction |
| BTGK1                 | $BTap[c] + BTgum[c] \leftrightarrow BTadp[c] + BTgpk[c]$                                | -1000 | 1000 | BT_2009                                                                                                                                                                                                                                                                                                                                                                                                                                                        | <i>R. thermotomacron</i> metabolite/ transport/ demand reaction |
| BTGK2                 | $BTadp[c] + BTgum[c] \leftrightarrow BTgpk[c] + BTadp[c]$                               | -1000 | 1000 | BT_2009                                                                                                                                                                                                                                                                                                                                                                                                                                                        | <i>R. thermotomacron</i> metabolite/ transport/ demand reaction |
| BTGLCAASE8e           | $BTb2o[c] + BTn[c] \rightarrow BTgum[c] + BTn\_deg1[e]$                                 | 0     | 1000 | (BT_3292 or BT_4151)                                                                                                                                                                                                                                                                                                                                                                                                                                           | <i>R. thermotomacron</i> metabolite/ transport/ demand reaction |
| BTGLCAASE9e           | $2\ BTb2o[c] + BTn\_pse1[e] \rightarrow BTgum[c] + BTgum[c]$                            | 0     | 1000 | (BT_3292 or BT_4151)                                                                                                                                                                                                                                                                                                                                                                                                                                           | <i>R. thermotomacron</i> metabolite/ transport/ demand reaction |
| BTGLCAASE_H8e         | $BTb2o[c] + BTgpg\_deg\_12[e] \rightarrow BTgum[c] + BTgpg\_deg\_13[e]$                 | 0     | 1000 | (BT_3292 or BT_4151)                                                                                                                                                                                                                                                                                                                                                                                                                                           | <i>R. thermotomacron</i> metabolite/ transport/ demand reaction |
| BTGLCAASEi            | $BTb2o[c] + BTgpk[c] \rightarrow BTgum[c] + BTgum[c]$                                   | 0     | 1000 | (BT_3292 or BT_4151 or BT_3350)                                                                                                                                                                                                                                                                                                                                                                                                                                | <i>R. thermotomacron</i> metabolite/ transport/ demand reaction |
| BTGLNCACASE_H81       | $2\ BTb2o[c] + 2\ BTn[e] + BTgpg\_deg\_4[e] \rightarrow 2\ BTgum[c] + BTgum[c]$         | 0     | 1000 | (BT_0438 or BT_3590 or BT_4359)                                                                                                                                                                                                                                                                                                                                                                                                                                | <i>R. thermotomacron</i> metabolite/ transport/ demand reaction |
| BTGLNCACASE_H82       | $BTb2o[c] + BTn[e] + BTgpg\_deg\_11[e] \rightarrow BTgum[c] + BTgpg\_deg\_12[e]$        | 0     | 1000 | (BT_0438 or BT_3590 or BT_4359)                                                                                                                                                                                                                                                                                                                                                                                                                                | <i>R. thermotomacron</i> metabolite/ transport/ demand reaction |
| BTGLNCACASE_H83       | $BTb2o[c] + BTgpg\_deg\_13[e] + BTgum[c] + BTgpg\_deg\_14[e]$                           | 0     | 1000 | (BT_0438 or BT_3590 or BT_4359)                                                                                                                                                                                                                                                                                                                                                                                                                                | <i>R. thermotomacron</i> metabolite/ transport/ demand reaction |
| BTGLNCACASE_OGLYCAN1e | $BTb2o[c] + BTcon2[e] \rightarrow BTgum[c] + BTn\_antigen[e]$                           | 0     | 1000 | (BT_2825 or BT_1038 or BT_1044 or BT_1048 or BT_0865 or BT_1282 or BT_3753 or BT_4132 or BT_4406 or BT_3985 or BT_3987) and ((BT_1039 and BT_1040) or (BT_1042 and BT_1043) or (BT_1046 and BT_1047) or (BT_4134 and BT_4135) or (BT_4404 and BT_4405) or (BT_3983 and BT_3984) or BT_0866 and BT_0867) or (BT_3751 and BT_3752) or (BT_1280 and BT_1281) or (BT_3958 and BT_3959) or (BT_4633 and BT_4634) or (BT_2818 and BT_2819) or (BT_2820 and BT_2821)) | <i>R. thermotomacron</i> metabolite/ transport/ demand reaction |
| BTGLNCACASE_OGLYCAN2e | $BTb2o[c] + BTcon2[e] \rightarrow BTgum[c] + BTcon2[e]$                                 | 0     | 1000 | (BT_2825 or BT_1038 or BT_1044 or BT_1048 or BT_0865 or BT_1282 or BT_3753 or BT_4132 or BT_4406 or BT_3985 or BT_3987) and ((BT_1039 and BT_1040) or (BT_1042 and BT_1043) or (BT_1046 and BT_1047) or (BT_4134 and BT_4135) or (BT_4404 and BT_4405) or (BT_3983 and BT_3984) or BT_0866 and BT_0867) or (BT_3751 and BT_3752) or (BT_1280 and BT_1281) or (BT_3958 and BT_3959) or (BT_4633 and BT_4634) or (BT_2818 and BT_2819) or (BT_2820 and BT_2821)) | <i>R. thermotomacron</i> metabolite/ transport/ demand reaction |
| BTGLNCACASE_OGLYCAN3e | $BTb2o[c] + BTcon2[e] \rightarrow BTgum[c] + BTn\_antigen[e]$                           | 0     | 1000 | (BT_2825 or BT_1038 or BT_1044 or BT_1048 or BT_0865 or BT_1282 or BT_3753 or BT_4132 or BT_4406 or BT_3985 or BT_3987) and ((BT_1039 and BT_1040) or (BT_1042 and BT_1043) or (BT_1046 and BT_1047) or (BT_4134 and BT_4135) or (BT_4404 and BT_4405) or (BT_3983 and BT_3984) or BT_0866 and BT_0867) or (BT_3751 and BT_3752) or (BT_1280 and BT_1281) or (BT_3958 and BT_3959) or (BT_4633 and BT_4634) or (BT_2818 and BT_2819) or (BT_2820 and BT_2821)) | <i>R. thermotomacron</i> metabolite/ transport/ demand reaction |
| BTGLNCACASE_OGLYCAN4e | $BTb2o[c] + BTcon2[e] \rightarrow BTgum[c] + BTn\_antigen[e]$                           | 0     | 1000 | (BT_2825 or BT_1038 or BT_1044 or BT_1048 or BT_0865 or BT_1282 or BT_3753 or BT_4132 or BT_4406 or BT_3985 or BT_3987) and ((BT_1039 and BT_1040) or (BT_1042 and BT_1043) or (BT_1046 and BT_1047) or (BT_4134 and BT_4135) or (BT_4404 and BT_4405) or (BT_3983 and BT_3984) or BT_0866 and BT_0867) or (BT_3751 and BT_3752) or (BT_1280 and BT_1281) or (BT_3958 and BT_3959) or (BT_4633 and BT_4634) or (BT_2818 and BT_2819) or (BT_2820 and BT_2821)) | <i>R. thermotomacron</i> metabolite/ transport/ demand reaction |
| BTGLNCACASE_OGLYCAN5e | $BTb2o[c] + BTcon3[e] \rightarrow BTgum[c] + BTcon3[e]$                                 | 0     | 1000 | (BT_2825 or BT_1038 or BT_1044 or BT_1048 or BT_0865 or BT_1282 or BT_3753 or BT_4132 or BT_4406 or BT_3985 or BT_3987) and ((BT_1039 and BT_1040) or (BT_1042 and BT_1043) or (BT_1046 and BT_1047) or (BT_4134 and BT_4135) or (BT_4404 and BT_4405) or (BT_3983 and BT_3984) or BT_0866 and BT_0867) or (BT_3751 and BT_3752) or (BT_1280 and BT_1281) or (BT_3958 and BT_3959) or (BT_4633 and BT_4634) or (BT_2818 and BT_2819) or (BT_2820 and BT_2821)) | <i>R. thermotomacron</i> metabolite/ transport/ demand reaction |
| BTGLNCACASE_OGLYCAN6e | $BTb2o[c] + BTcon3[e] \rightarrow BTgum[c] + BTn\_antigen[e]$                           | 0     | 1000 | (BT_2825 or BT_1038 or BT_1044 or BT_1048 or BT_0865 or BT_1282 or BT_3753 or BT_4132 or BT_4406 or BT_3985 or BT_3987) and ((BT_1039 and BT_1040) or (BT_1042 and BT_1043) or (BT_1046 and BT_1047) or (BT_4134 and BT_4135) or (BT_4404 and BT_4405) or (BT_3983 and BT_3984) or BT_0866 and BT_0867) or (BT_3751 and BT_3752) or (BT_1280 and BT_1281) or (BT_3958 and BT_3959) or (BT_4633 and BT_4634) or (BT_2818 and BT_2819) or (BT_2820 and BT_2821)) | <i>R. thermotomacron</i> metabolite/ transport/ demand reaction |
| BTGLCP                | $BTpk[c] + BTgycogen[c] \rightarrow BTgpk[c]$                                           | 0     | 1000 | (BT_1100 or BT_1293)                                                                                                                                                                                                                                                                                                                                                                                                                                           | <i>R. thermotomacron</i> metabolite/ transport/ demand reaction |
| BTGLCS2               | $BTadp[c] \rightarrow BTn[c] + BTadp[c] + BTgycogen[c]$                                 | 0     | 1000 | (BT_1294 or BT_4307)                                                                                                                                                                                                                                                                                                                                                                                                                                           | <i>R. thermotomacron</i> metabolite/ transport/ demand reaction |
| BTGLCUR2r             | $BTn[c] + BTguk[c] \leftrightarrow BTn[e] + BTguk[e]$                                   | -1000 | 1000 | BT_4105                                                                                                                                                                                                                                                                                                                                                                                                                                                        | <i>R. thermotomacron</i> metabolite/ transport/ demand reaction |
| BTGLC2r               | $BTn[c] + BTgk-D[e] \leftrightarrow BTn[e] + BTgk-D[e]$                                 | -1000 | 1000 | (BT_3589 or BT_1758 or BT_0371 or BT_4311 or BT_4653)                                                                                                                                                                                                                                                                                                                                                                                                          | <i>R. thermotomacron</i> metabolite/ transport/ demand reaction |
| BTGLC4                | $BTn[e] + BTgk-D[e] \leftrightarrow BTn[c] + BTgk-D[e]$                                 | -1000 | 1000 | BT_0355                                                                                                                                                                                                                                                                                                                                                                                                                                                        | <i>R. thermotomacron</i> metabolite/ transport/ demand reaction |
| BTGLNS                | $BTgk-L[c] + BTap[c] + BTn[e] + BTn[e] + BTpk[c] + BTadp[c] + BTgk-L[c]$                | 0     | 1000 | (BT_0453 or BT_0543 or BT_0785 or BT_4339)                                                                                                                                                                                                                                                                                                                                                                                                                     | <i>R. thermotomacron</i> metabolite/ transport/ demand reaction |
| BTGLN2r               | $BTn[e] + BTgk-L[c] \leftrightarrow BTn[c] + BTgk-L[c]$                                 | -1000 | 1000 |                                                                                                                                                                                                                                                                                                                                                                                                                                                                | <i>R. thermotomacron</i> metabolite/ transport/ demand reaction |
| BTGLUSK               | $BTgk-L[c] + BTap[c] \rightarrow BTadp[c] + BTgpk[c]$                                   | 0     | 1000 | BT_3719                                                                                                                                                                                                                                                                                                                                                                                                                                                        | <i>R. thermotomacron</i> metabolite/ transport/ demand reaction |
| BTGLLIABU707          | $BTgk-L[c] + BTn[e] \leftrightarrow BTgk-L[c] + BTn[e]$                                 | -1000 | 1000 | BT_2573                                                                                                                                                                                                                                                                                                                                                                                                                                                        | <i>R. thermotomacron</i> metabolite/ transport/ demand reaction |
| BTGLUDC               | $BTn[c] + BTgk-L[c] \rightarrow BTco2[c] + BTn[e]$                                      | 0     | 1000 | BT_2570                                                                                                                                                                                                                                                                                                                                                                                                                                                        | <i>R. thermotomacron</i> metabolite/ transport/ demand reaction |
| BTGLUDa               | $BTb2o[c] + BTgk-L[c] + BTn[e] + BTgk-L[c] + BTn[e] + BTn[e]$                           | 0     | 1000 | (BT_1970 or BT_1973)                                                                                                                                                                                                                                                                                                                                                                                                                                           | <i>R. thermotomacron</i> metabolite/ transport/ demand reaction |
| BTGLUDy               | $BTb2o[c] + BTgk-L[c] + BTn[e] \leftrightarrow BTn[c] + BTgk-L[c] + BTn[e] + BTn[e]$    | -1000 | 1000 | BT_1970                                                                                                                                                                                                                                                                                                                                                                                                                                                        | <i>R. thermotomacron</i> metabolite/ transport/ demand reaction |
| BTGLUFORT             | $BTgk-L[c] + BTn[e] \leftrightarrow BTn[c] + BTn[e] + BTgk-L[c]$                        | -1000 | 1000 | BT_2693                                                                                                                                                                                                                                                                                                                                                                                                                                                        | <i>R. thermotomacron</i> metabolite/ transport/ demand reaction |
| BTGLUN                | $BTb2o[c] + BTgk-L[c] \rightarrow BTgk-L[c] + BTn[e]$                                   | 0     | 1000 | BT_2571                                                                                                                                                                                                                                                                                                                                                                                                                                                        | <i>R. thermotomacron</i> metabolite/ transport/ demand reaction |
| BTGLUPRT              | $BTb2o[c] + BTpp[c] + BTgk-L[c] \rightarrow BTgk-L[c] + BTpp[c] + BTn[e]$               | 0     | 1000 | (BT_0555 or BT_4582)                                                                                                                                                                                                                                                                                                                                                                                                                                           | <i>R. thermotomacron</i> metabolite/ transport/ demand reaction |
| BTGLJLR               | $BTgk-L[c] \leftrightarrow BTgk-L[c]$                                                   | -1000 | 1000 | BT_3722                                                                                                                                                                                                                                                                                                                                                                                                                                                        | <i>R. thermotomacron</i> metabolite/ transport/ demand reaction |
| BTGLUSy               | $BTn[c] + BTgk-L[c] + BTn[e] + BTgk-L[c] \rightarrow 2\ BTgk-L[c] + BTn[e]$             | 0     | 1000 | (BT_0552 and BT_0553)                                                                                                                                                                                                                                                                                                                                                                                                                                          | <i>R. thermotomacron</i> metabolite/ transport/ demand reaction |
| BTGLYASN1c            | $BTb2o[c] + BTgum[c] \leftrightarrow BTgk[c] + BTn-L[c]$                                | -1000 | 1000 | (BT_3464 or BT_3926 or BT_3996 or BT_0149 or BT_4193 or BT_3254 or BT_1260 or BT_1261 or BT_1314)                                                                                                                                                                                                                                                                                                                                                              | <i>R. thermotomacron</i> metabolite/ transport/ demand reaction |
| BTGLYASNv             | $BTn[e] + BTgum[c] \rightarrow BTn[c] + BTgum[c]$                                       | 0     | 1000 |                                                                                                                                                                                                                                                                                                                                                                                                                                                                | <i>R. thermotomacron</i> metabolite/ transport/ demand reaction |
| BTGLYASP1c            | $BTb2o[c] + BTgum[c] \leftrightarrow BTgk-L[c] + BTgk[c]$                               | -1000 | 1000 | (BT_3464 or BT_3926 or BT_3996 or BT_0149 or BT_4193 or BT_3254 or BT_1260 or BT_1261 or BT_1314)                                                                                                                                                                                                                                                                                                                                                              | <i>R. thermotomacron</i> metabolite/ transport/ demand reaction |
| BTGLYASPh             | $BTn[c] + BTgum[c] \rightarrow BTn[c] + BTgum[c]$                                       | 0     | 1000 |                                                                                                                                                                                                                                                                                                                                                                                                                                                                | <i>R. thermotomacron</i> metabolite/ transport/ demand reaction |
| BTGLYAT               | $BTn[e] + BTgk[c] \leftrightarrow BTn[c] + BTgk[c]$                                     | -1000 | 1000 | BT_1371                                                                                                                                                                                                                                                                                                                                                                                                                                                        | <i>R. thermotomacron</i> metabolite/ transport/ demand reaction |
| BTGLYbabc             | $BTb2o[c] + BTap[c] + BTgk-L[c] \rightarrow BTn[c] + BTpk[c] + BTn[e] + BTgk-L[c]$      | 0     | 1000 | (BT_1749 and BT_1750 and BT_1751)                                                                                                                                                                                                                                                                                                                                                                                                                              | <i>R. thermotomacron</i> metabolite/ transport/ demand reaction |
| BTGLYCK               | $BTap[c] + BTgk-R[c] \rightarrow BTn[c] + BTadp[c] + BTgpk[c]$                          | 0     | 1000 | BT_1437                                                                                                                                                                                                                                                                                                                                                                                                                                                        | <i>R. thermotomacron</i> metabolite/ transport/ demand reaction |
| BTGLYCOs              | $1124\ BTb2o[c] + BTgycogen1500[c] \rightarrow 750\ BTgk-D[e] + 375\ BTn[e]$            | 0     | 1000 | (BT_3698 and BT_3701 and BT_3702)                                                                                                                                                                                                                                                                                                                                                                                                                              | <i>R. thermotomacron</i> metabolite/ transport/ demand reaction |

|                |                                                                                                     |       |      |                                                                                                                                                                                                                                                                                             |                                                     |
|----------------|-----------------------------------------------------------------------------------------------------|-------|------|---------------------------------------------------------------------------------------------------------------------------------------------------------------------------------------------------------------------------------------------------------------------------------------------|-----------------------------------------------------|
| BTGLYD         | $BTb[c] + BTaadh[c] + BTgpy[c] \leftrightarrow BTaadh[c] + BTgpy-R[c]$                              | -1000 | 1000 | BT_1207                                                                                                                                                                                                                                                                                     | R. thelatoaomicron metabo/transport demand reaction |
| BTGLYGLN1c     | $BTb2o[c] + BTgphb[c] \leftrightarrow BTgls-L[c] + BTgph[c]$                                        | -1000 | 1000 | (BT_3464 or BT_3926 or BT_3996 or BT_0149 or BT_4193 or BT_3254 or BT_1260 or BT_1261 or BT_1314)                                                                                                                                                                                           | R. thelatoaomicron metabo/transport demand reaction |
| BTGLYGLN1      | $BTb[c] + BTgphb[c] \rightarrow BTb[c] + BTgphb[c]$                                                 | 0     | 1000 | (BT_0580 or BT_4385 or BT_1086)                                                                                                                                                                                                                                                             | R. thelatoaomicron metabo/transport demand reaction |
| BTGLYGLU1c     | $BTb2o[c] + BTgphb[c] \leftrightarrow BTgls-L[c] + BTgph[c]$                                        | -1000 | 1000 | (BT_3464 or BT_3926 or BT_3996 or BT_0149 or BT_4193 or BT_3254 or BT_1260 or BT_1261 or BT_1314)                                                                                                                                                                                           | R. thelatoaomicron metabo/transport demand reaction |
| BTGLYGLU1      | $BTb[c] + BTgphb[c] \rightarrow BTb[c] + BTgphb[c]$                                                 | 0     | 1000 | (BT_0580 or BT_4385 or BT_1086)                                                                                                                                                                                                                                                             | R. thelatoaomicron metabo/transport demand reaction |
| BTGLYGLYb1     | $BTb2o[c] + BTgphb[c] \rightarrow 2 BTgph[c]$                                                       | 0     | 1000 | (BT_3464 or BT_3926 or BT_3996 or BT_0149 or BT_4193 or BT_3254 or BT_1260 or BT_1261 or BT_1314)                                                                                                                                                                                           | R. thelatoaomicron metabo/transport demand reaction |
| BTGLYGLY1      | $BTb[c] + BTgphb[c] \leftrightarrow BTb[c] + BTgphb[c]$                                             | -1000 | 1000 | (BT_0580 or BT_4385 or BT_1086)                                                                                                                                                                                                                                                             | R. thelatoaomicron metabo/transport demand reaction |
| BTGLYKc        | $BTarp[c] + BTgph[c] \leftrightarrow BTb[c] + BTadp[c] + BTgph-cp[c]$                               | -1000 | 1000 |                                                                                                                                                                                                                                                                                             | R. thelatoaomicron metabo/transport demand reaction |
| BTGLYLEUHYDROc | $BTb2o[c] + BTgphb[c] \leftrightarrow BTgph[c] + BTksu-L[c]$                                        | -1000 | 1000 | (BT_3464 or BT_3926 or BT_3996 or BT_0149 or BT_4193 or BT_3254 or BT_1260 or BT_1261 or BT_1314)                                                                                                                                                                                           | R. thelatoaomicron metabo/transport demand reaction |
| BTGLYLEUHYDROe | $BTb2o[c] + BTgphb[c] \rightarrow BTgph[c] + BTksu-L[c]$                                            | 0     | 1000 | BT_2548                                                                                                                                                                                                                                                                                     | R. thelatoaomicron metabo/transport demand reaction |
| BTGLYLEUPEPT1  | $BTb[c] + BTgphb[c] \rightarrow BTb[c] + BTgphb[c]$                                                 | 0     | 1000 | (BT_0580 or BT_4385 or BT_1086)                                                                                                                                                                                                                                                             | R. thelatoaomicron metabo/transport demand reaction |
| BTGLYMET1c     | $BTb2o[c] + BTgphb[c] \leftrightarrow BTgph[c] + BTmet-L[c]$                                        | -1000 | 1000 | (BT_3464 or BT_3926 or BT_3996 or BT_0149 or BT_4193 or BT_3254 or BT_1260 or BT_1261 or BT_1314)                                                                                                                                                                                           | R. thelatoaomicron metabo/transport demand reaction |
| BTGLYMETb      | $BTb[c] + BTgphb[c] \rightarrow BTb[c] + BTgphb[c]$                                                 | 0     | 1000 | (BT_0580 or BT_4385 or BT_1086)                                                                                                                                                                                                                                                             | R. thelatoaomicron metabo/transport demand reaction |
| BTGLYPHEH1     | $BTb2o[c] + BTgphb[c] \rightarrow BTgph[c] + BTphs-L[c]$                                            | 0     | 1000 | (BT_3464 or BT_3926 or BT_3996 or BT_0149 or BT_4193 or BT_3254 or BT_1260 or BT_1261 or BT_1314)                                                                                                                                                                                           | R. thelatoaomicron metabo/transport demand reaction |
| BTGLYPHEb      | $BTb[c] + BTgphb[c] \leftrightarrow BTb[c] + BTgphb[c]$                                             | -1000 | 1000 | (BT_0580 or BT_4385 or BT_1086)                                                                                                                                                                                                                                                             | R. thelatoaomicron metabo/transport demand reaction |
| BTGLYPROP1c    | $BTb2o[c] + BTgphb[c] \leftrightarrow BTgph[c] + BTpro-L[c]$                                        | -1000 | 1000 | (BT_3464 or BT_3926 or BT_3996 or BT_0149 or BT_4193 or BT_3254 or BT_1260 or BT_1261 or BT_1314)                                                                                                                                                                                           | R. thelatoaomicron metabo/transport demand reaction |
| BTGLYPROP1e    | $BTb2o[c] + BTgphb[c] \rightarrow BTpro-L[c] + BTgph[c]$                                            | 0     | 1000 | BT_0587                                                                                                                                                                                                                                                                                     | R. thelatoaomicron metabo/transport demand reaction |
| BTGLYPROc      | $BTb[c] + BTgphb[c] \rightarrow BTb[c] + BTgphb[c]$                                                 | 0     | 1000 | (BT_0580 or BT_4385 or BT_1086)                                                                                                                                                                                                                                                             | R. thelatoaomicron metabo/transport demand reaction |
| BTGLYTYR1c     | $BTb2o[c] + BTgphb[c] \leftrightarrow BTgph[c] + BTtyr-L[c]$                                        | -1000 | 1000 | (BT_3464 or BT_3926 or BT_3996 or BT_0149 or BT_4193 or BT_3254 or BT_1260 or BT_1261 or BT_1314)                                                                                                                                                                                           | R. thelatoaomicron metabo/transport demand reaction |
| BTGLYTYRb      | $BTb[c] + BTgphb[c] \rightarrow BTb[c] + BTgphb[c]$                                                 | 0     | 1000 | (BT_0580 or BT_4385 or BT_1086)                                                                                                                                                                                                                                                             | R. thelatoaomicron metabo/transport demand reaction |
| BTGLYDc        | $BTb[c] + BTgph[c] \leftrightarrow BTb[c] + BTgph[c]$                                               | -1000 | 1000 |                                                                                                                                                                                                                                                                                             | R. thelatoaomicron metabo/transport demand reaction |
| BTGMAND        | $BTgdmam[c] \rightarrow BTb2o[c] + BTgdmam-c[c]$                                                    | 0     | 1000 | BT_1224                                                                                                                                                                                                                                                                                     | R. thelatoaomicron metabo/transport demand reaction |
| BTGMHEPAT      | $BTb[c] + BTarp[c] + BTgmpb-tp[c] \rightarrow BTp[c] + BTadpshp-DD[c]$                              | 0     | 1000 |                                                                                                                                                                                                                                                                                             | R. thelatoaomicron metabo/transport demand reaction |
| BTGMHEPc       | $BTarp[c] + BTgmpb-tp[c] \rightarrow BTb[c] + BTadp[c] + BTgmpb-tp[c]$                              | 0     | 1000 |                                                                                                                                                                                                                                                                                             | R. thelatoaomicron metabo/transport demand reaction |
| BTGMHEPPA      | $BTb2o[c] + BTgmpb-tp[c] \rightarrow BTp[c] + BTgmpb-tp[c]$                                         | 0     | 1000 | BT_0477                                                                                                                                                                                                                                                                                     | R. thelatoaomicron metabo/transport demand reaction |
| BTGMPs2        | $BTb2o[c] + BTarp[c] + BTgls-L[c] + BTamp[c] \rightarrow 2 BTb[c] + BTgls-L[c] + BTarp[c] + BTp[c]$ | 0     | 1000 | (BT_2419 or BT_4265)                                                                                                                                                                                                                                                                        | R. thelatoaomicron metabo/transport demand reaction |
| BTGND          | $BTadp[c] + BTpge[c] \rightarrow BTadp[c] + BTcon[c] + BTndp-D[c]$                                  | 0     | 1000 | BT_1222                                                                                                                                                                                                                                                                                     | R. thelatoaomicron metabo/transport demand reaction |
| BTGNNUC        | $BTb2o[c] + BTgac[c] \rightarrow BTb-D[c] + BTgac[c]$                                               | 0     | 1000 | BT_2808                                                                                                                                                                                                                                                                                     | R. thelatoaomicron metabo/transport demand reaction |
| BTGPDDA1       | $BTb2o[c] + BTgph[c] \rightarrow BTb[c] + BTbsh[c] + BTgph-3p[c]$                                   | 0     | 1000 | (BT_0442 or BT_0550 or BT_0195 or BT_3162 or BT_4727)                                                                                                                                                                                                                                       | R. thelatoaomicron metabo/transport demand reaction |
| BTGPDDA2       | $BTb2o[c] + BTgph[c] \rightarrow BTb[c] + BTgph-3p[c] + BTbsh[c]$                                   | 0     | 1000 | (BT_0442 or BT_0550 or BT_0195 or BT_3162 or BT_4727)                                                                                                                                                                                                                                       | R. thelatoaomicron metabo/transport demand reaction |
| BTGPDDA4       | $BTb2o[c] + BTgph[c] \rightarrow BTb[c] + BTgph[c] + BTgph-3p[c]$                                   | 0     | 1000 | (BT_0442 or BT_0550 or BT_0195 or BT_3162 or BT_4727)                                                                                                                                                                                                                                       | R. thelatoaomicron metabo/transport demand reaction |
| BTGRTT         | $BTpdp[c] + BTgph[c] \rightarrow BTp[c] + BTpdp[c]$                                                 | 0     | 1000 | (BT_3261 or BT_2058)                                                                                                                                                                                                                                                                        | R. thelatoaomicron metabo/transport demand reaction |
| BTGSNGc        | $BTb[c] + BTgac[c] \leftrightarrow BTb[c] + BTgac[c]$                                               | -1000 | 1000 | BT_4330                                                                                                                                                                                                                                                                                     | R. thelatoaomicron metabo/transport demand reaction |
| BTGTPC1        | $BTb2o[c] + BTgpc[c] \rightarrow BTb[c] + BTbsh[c] + BTgpc[c]$                                      | 0     | 1000 | BT_3931                                                                                                                                                                                                                                                                                     | R. thelatoaomicron metabo/transport demand reaction |
| BTGTPC2        | $2 BTb2o[c] + BTgpc[c] \rightarrow 2 BTb[c] + BTp[c] + BTadp[c] + BT2shdp[c]$                       | 0     | 1000 | BT_2416                                                                                                                                                                                                                                                                                     | R. thelatoaomicron metabo/transport demand reaction |
| BTGTPDPOP      | $BTb2o[c] + BTgphb[c] \rightarrow BTb[c] + BTp[c] + BTpmp[c]$                                       | 0     | 1000 | BT_0540                                                                                                                                                                                                                                                                                     | R. thelatoaomicron metabo/transport demand reaction |
| BTGTPDPK       | $BTarp[c] + BTgpc[c] \rightarrow BTb[c] + BTarp[c] + BTgphb[c]$                                     | 0     | 1000 | (BT_0700 or BT_3998)                                                                                                                                                                                                                                                                        | R. thelatoaomicron metabo/transport demand reaction |
| BTGLAPKT       | $BTpmp[c] + BTgac[c] \rightarrow BTp[c] + BTgmp[c]$                                                 | 0     | 1000 | BT_4386                                                                                                                                                                                                                                                                                     | R. thelatoaomicron metabo/transport demand reaction |
| BTGLU1         | $BTgkur[c] \leftrightarrow BTaadh[c]$                                                               | -1000 | 1000 | BT_0823                                                                                                                                                                                                                                                                                     | R. thelatoaomicron metabo/transport demand reaction |
| BTGLU2         | $BTgahr[c] \leftrightarrow BTgpc[c]$                                                                | -1000 | 1000 | BT_0823                                                                                                                                                                                                                                                                                     | R. thelatoaomicron metabo/transport demand reaction |
| BTDOc          | $BTb2o[c] \leftrightarrow BTb2o[c]$                                                                 | -1000 | 1000 | BT_4718                                                                                                                                                                                                                                                                                     | R. thelatoaomicron metabo/transport demand reaction |
| BTDSb          | $BTb2o[c] \leftrightarrow BTb2o[c]$                                                                 | -1000 | 1000 |                                                                                                                                                                                                                                                                                             | R. thelatoaomicron metabo/transport demand reaction |
| BTDO3E         | $BTb2o[c] + BTco2[c] \leftrightarrow BTb[c] + BTcoo[c]$                                             | -1000 | 1000 | BT_1681                                                                                                                                                                                                                                                                                     | R. thelatoaomicron metabo/transport demand reaction |
| BTDCYSMT       | $BTbys-L[c] + BTmet[c] \rightarrow BTb[c] + BTbacy[c] + BTmet-L[c]$                                 | 0     | 1000 | BT_0180                                                                                                                                                                                                                                                                                     | R. thelatoaomicron metabo/transport demand reaction |
| BTDEMEb        | $BTb2o[c] + BTarp[c] + BTpmet[c] + BTb[c] + BTp[c] + BTadp[c] + BTpmet[c]$                          | 0     | 1000 | (BT_0491 and BT_0492 and BT_0493 and BT_0494 and BT_0495 and BT_0496 and BT_0497 and BT_0498 and BT_0499) or (BT_1950 and BT_1951 and BT_1952)                                                                                                                                              | R. thelatoaomicron metabo/transport demand reaction |
| BTDEPARL4_e    | $2 BTb2o[c] + BTgph[c] \rightarrow 2 BTb[c] + BTgpm2o[c] + BTgpc-deg-1[c] + BTgpc-deg-2[c]$         | 0     | 1000 | BT_4675                                                                                                                                                                                                                                                                                     | R. thelatoaomicron metabo/transport demand reaction |
| BTDETT         | $BTpdp[c] + BTpdp[c] \rightarrow BTp[c] + BTpdp[c]$                                                 | 0     | 1000 | (BT_3261 or BT_2058)                                                                                                                                                                                                                                                                        | R. thelatoaomicron metabo/transport demand reaction |
| BTDEX1         | $BTarp[c] + BTgls-D[c] \rightarrow BTb[c] + BTadp[c] + BTgph[c]$                                    | 0     | 1000 | (BT_2430 or BT_2493 or BT_4654)                                                                                                                                                                                                                                                             | R. thelatoaomicron metabo/transport demand reaction |
| BTDEX10        | $BTarp[c] + BTgpm[c] \rightarrow BTb[c] + BTadp[c] + BTgmpdp[c]$                                    | 0     | 1000 | BT_2430                                                                                                                                                                                                                                                                                     | R. thelatoaomicron metabo/transport demand reaction |
| BTDEX11        | $BTarp[c] + BTgahr[c] \rightarrow BTb[c] + BTadp[c] + BTgahrmp[c]$                                  | 0     | 1000 |                                                                                                                                                                                                                                                                                             | R. thelatoaomicron metabo/transport demand reaction |
| BTDEX4         | $BTarp[c] + BTgpm[c] \rightarrow BTb[c] + BTadp[c] + BTgmpdp[c]$                                    | 0     | 1000 | (BT_2430 or BT_2493 or BT_4654)                                                                                                                                                                                                                                                             | R. thelatoaomicron metabo/transport demand reaction |
| BTDEX7         | $BTarp[c] + BTbsh[c] \rightarrow BTb[c] + BTadp[c] + BTgpc[c]$                                      | 0     | 1000 | (BT_1757 or BT_3305)                                                                                                                                                                                                                                                                        | R. thelatoaomicron metabo/transport demand reaction |
| BTDEXTT        | $BTpdp[c] + BTadp[c] \rightarrow BTp[c] + BTpdp[c]$                                                 | 0     | 1000 | (BT_3261 or BT_2058)                                                                                                                                                                                                                                                                        | R. thelatoaomicron metabo/transport demand reaction |
| BTDEXb         | $BTarp[c] + BTgls-bD[c] \rightarrow BTb[c] + BTadp[c] + BTgph-b[c]$                                 | 0     | 1000 | (BT_2430 or BT_2493 or BT_4654)                                                                                                                                                                                                                                                             | R. thelatoaomicron metabo/transport demand reaction |
| BTDC2ab        | $BTb2o[c] + BTarp[c] + BTg2[c] \rightarrow BTb[c] + BTp[c] + BTadp[c] + BTg2[c]$                    | 0     | 1000 | BT_1091                                                                                                                                                                                                                                                                                     | R. thelatoaomicron metabo/transport demand reaction |
| BTDSID         | $BTb-L[c] \rightarrow BTbsh[c] + BTacac[c]$                                                         | 0     | 1000 | BT_2690                                                                                                                                                                                                                                                                                     | R. thelatoaomicron metabo/transport demand reaction |
| BTDSIDT        | $BTb2o[c] + 2 BTaadh[c] + BTaadh[c] \rightarrow 3 BTb[c] + 2 BTaadh[c] + BTb-L[c]$                  | 0     | 1000 | BT_0201                                                                                                                                                                                                                                                                                     | R. thelatoaomicron metabo/transport demand reaction |
| BTDSITP        | $BTb2o[c] + BTarp[c] \rightarrow BTp[c] + BTaadh[c]$                                                | 0     | 1000 | (BT_0203 or BT_1478 or BT_4257)                                                                                                                                                                                                                                                             | R. thelatoaomicron metabo/transport demand reaction |
| BTDSGr         | $BTb[c] + BTb-L[c] \leftrightarrow BTb[c] + BTb-L[c]$                                               | -1000 | 1000 |                                                                                                                                                                                                                                                                                             | R. thelatoaomicron metabo/transport demand reaction |
| BTDMPK1        | $BTarp[c] + BTgahmp[c] \rightarrow BTb[c] + BTadp[c] + BTgahmp[c]$                                  | 0     | 1000 | BT_0790                                                                                                                                                                                                                                                                                     | R. thelatoaomicron metabo/transport demand reaction |
| BTDOMOGALase   | $100 BTb2o[c] + BTgongap[c] \rightarrow 20 BTac[c] + 100 BTgahr[c] + 20 BTaadh[c]$                  | 0     | 1000 | (BT_4146 or BT_4149 or BT_4153 or BT_4155 or BT_4170 or BT_4183 or BT_4115 or BT_4116 or BT_4119 or BT_4123) and BT_4150 and BT_4175 and (BT_4109 or BT_4110) and (BT_4670 or BT_4671) or (BT_4164 and BT_4165) or (BT_4113 and BT_4114) or (BT_4121 and BT_4122) or (BT_3680 and BT_3681)) | R. thelatoaomicron metabo/transport demand reaction |
| BTDP9K         | $BTarp[c] + BT2ahmp[c] \rightarrow BTb[c] + BTarp[c] + BT2ahmd[c]$                                  | 0     | 1000 | BT_3216                                                                                                                                                                                                                                                                                     | R. thelatoaomicron metabo/transport demand reaction |
| BTDSDa2        | $BTb[c] + BTaadh[c] + BTasp[c] \rightarrow BTaadh[c] + BTbom-L[c]$                                  | 0     | 1000 | BT_2403                                                                                                                                                                                                                                                                                     | R. thelatoaomicron metabo/transport demand reaction |
| BTDSDa2        | $BTb[c] + BTaadh[c] + BTasp[c] \rightarrow BTaadh[c] + BTbom-L[c]$                                  | 0     | 1000 | BT_2403                                                                                                                                                                                                                                                                                     | R. thelatoaomicron metabo/transport demand reaction |
| BTDSK          | $BTarp[c] + BTbom-L[c] \rightarrow BTb[c] + BTadp[c] + BTgpm[c]$                                    | 0     | 1000 |                                                                                                                                                                                                                                                                                             | R. thelatoaomicron metabo/transport demand reaction |
| BTDSST         | $BTbom-L[c] + BTacac[c] \rightarrow BTcon[c] + BTacacm[c]$                                          | 0     | 1000 | BT_2413                                                                                                                                                                                                                                                                                     | R. thelatoaomicron metabo/transport demand reaction |
| BTDSSTPb       | $BTgls[c] + BTgph[c] \leftrightarrow BTgls-L[c] + BTgmp[c]$                                         | -1000 | 1000 | BT_0202                                                                                                                                                                                                                                                                                     | R. thelatoaomicron metabo/transport demand reaction |
| BTDPNPT        | $BTpmp[c] + BTbacc[c] \rightarrow BTp[c] + BTarp[c]$                                                | 0     | 1000 | BT_4386                                                                                                                                                                                                                                                                                     | R. thelatoaomicron metabo/transport demand reaction |
| BTDYD1         | $2 BTb[c] + BTgls[c] + BTb2[c] \rightarrow 2 BTb[c] + BTgls2[c]$                                    | 0     | 1000 | (BT_1210 or BT_0124 or BT_1834)                                                                                                                                                                                                                                                             | R. thelatoaomicron metabo/transport demand reaction |
| BTDYD4         | $BTbsh[c] \leftrightarrow BTbacc[c] + BTb2[c]$                                                      | -1000 | 1000 | (BT_1210 or BT_0124 or BT_1834)                                                                                                                                                                                                                                                             | R. thelatoaomicron metabo/transport demand reaction |
| BTDPYUCORNS    | $BTcon[c] + BTacc[c] \rightarrow BTb2o[c] + BTacon[c]$                                              | 0     | 1000 |                                                                                                                                                                                                                                                                                             | R. thelatoaomicron metabo/transport demand reaction |
| BTDCOATA       | $BTACFP[c] + BTbacc[c] \leftrightarrow BTcon[c] + BT2mpropACP[c]$                                   | -1000 | 1000 | BT_0789                                                                                                                                                                                                                                                                                     | R. thelatoaomicron metabo/transport demand reaction |
| BTCDHr         | $BTaadh[c] + BTac[c] \leftrightarrow BTgls[c] + BTaadh[c] + BTco2[c]$                               | -1000 | 1000 | BT_2071                                                                                                                                                                                                                                                                                     | R. thelatoaomicron metabo/transport demand reaction |
| BTDMRS         | $BTchor[c] \leftrightarrow BTchor[c]$                                                               | -1000 | 1000 | BT_4700                                                                                                                                                                                                                                                                                     | R. thelatoaomicron metabo/transport demand reaction |
| BTDCURASE      | $BTb2o[c] + BTacpaldou[c] \rightarrow BTarp[c] + BTbsh[c]$                                          | 0     | 1000 |                                                                                                                                                                                                                                                                                             | R. thelatoaomicron metabo/transport demand reaction |
| BTDCURASE_HS1  | $BTb2o[c] + BTgpc-deg-1[c] \rightarrow BTgpc-deg-3[c] + BTbsh[c]$                                   | 0     | 1000 |                                                                                                                                                                                                                                                                                             | R. thelatoaomicron metabo/transport demand reaction |
| BTDCURASE_HS2  | $BTb2o[c] + BTgpc-deg-7[c] \rightarrow BTgpc-deg-8[c] + BTbsh[c]$                                   | 0     | 1000 |                                                                                                                                                                                                                                                                                             | R. thelatoaomicron metabo/transport demand reaction |

|                    |                                                                                                                             |       |      |                                                                                                                                                                                                                                                                                                                                                        |                                                                 |
|--------------------|-----------------------------------------------------------------------------------------------------------------------------|-------|------|--------------------------------------------------------------------------------------------------------------------------------------------------------------------------------------------------------------------------------------------------------------------------------------------------------------------------------------------------------|-----------------------------------------------------------------|
| BTIDOURASE_H83     | $BTb2a[c] + BThpg\_dgr\_14[e] \rightarrow BThpg\_dgr\_15[e] + BTha[nf]$                                                     | 0     | 1000 |                                                                                                                                                                                                                                                                                                                                                        | <i>R. thermotomasicron</i> metabolite/transport demand reaction |
| BTIGPS             | $BTgls-L[c] + BTgpf[c] \rightarrow BTg[c] + BTgls-L[c] + BTacm[c] + BTgls[c]$                                               | 0     | 1000 | (BT_1378 and BT_1380)                                                                                                                                                                                                                                                                                                                                  | <i>R. thermotomasicron</i> metabolite/transport demand reaction |
| BTIGPDH            | $BTgsp[c] \rightarrow BTb2a[c] + BTacp[c]$                                                                                  | 0     | 1000 | BT_0203                                                                                                                                                                                                                                                                                                                                                | <i>R. thermotomasicron</i> metabolite/transport demand reaction |
| BTIGPS             | $BTb[c] + BTgpc5p[c] \rightarrow BTb2a[c] + BTg2[c] + BTgls[c]$                                                             | 0     | 1000 | BT_0529                                                                                                                                                                                                                                                                                                                                                | <i>R. thermotomasicron</i> metabolite/transport demand reaction |
| BTIDCOATA          | $BTcoai[c] + BT14apndcACP[c] \leftrightarrow BTACp[c] + BTh2a[c]$                                                           | -1000 | 1000 | BT_0789                                                                                                                                                                                                                                                                                                                                                | <i>R. thermotomasicron</i> metabolite/transport demand reaction |
| BTBPOCOATA         | $BTcoai[c] + BT15apndcACP[c] \leftrightarrow BTACp[c] + BTh2a[c]$                                                           | -1000 | 1000 | BT_0789                                                                                                                                                                                                                                                                                                                                                | <i>R. thermotomasicron</i> metabolite/transport demand reaction |
| BTLETA             | $BTahg[c] + BTle-L[c] \leftrightarrow BTgls-L[c] + BTlmp[c]$                                                                | -1000 | 1000 | BT_3892                                                                                                                                                                                                                                                                                                                                                | <i>R. thermotomasicron</i> metabolite/transport demand reaction |
| BTLEL2r            | $BTb[c] + BTle-L[c] \leftrightarrow BTb[c] + BTle-L[c]$                                                                     | -1000 | 1000 |                                                                                                                                                                                                                                                                                                                                                        | <i>R. thermotomasicron</i> metabolite/transport demand reaction |
| BTIMPC             | $BTb2a[c] + BTlmp[c] \leftrightarrow BTlpc[c]$                                                                              | -1000 | 1000 | BT_3812                                                                                                                                                                                                                                                                                                                                                | <i>R. thermotomasicron</i> metabolite/transport demand reaction |
| BTIMP0             | $BTb2a[c] + BTlmp[c] \rightarrow BTb[c] + BTlmp[c] + BTlmp[c]$                                                              | 0     | 1000 | BT_3845                                                                                                                                                                                                                                                                                                                                                | <i>R. thermotomasicron</i> metabolite/transport demand reaction |
| BTINSH             | $BTb2a[c] + BTlmp[c] \rightarrow BTb-L[c] + BTlmp[c]$                                                                       | 0     | 1000 | BT_2808                                                                                                                                                                                                                                                                                                                                                | <i>R. thermotomasicron</i> metabolite/transport demand reaction |
| BTINS2             | $BTb[c] + BTlmp[c] \leftrightarrow BTb[c] + BTlmp[c]$                                                                       | -1000 | 1000 | BT_4330                                                                                                                                                                                                                                                                                                                                                | <i>R. thermotomasicron</i> metabolite/transport demand reaction |
| BTNCLINASE         | $25 BTb2a[c] + BTlmp[c] \rightarrow 25 BTb[c] + BTlmp[c]$                                                                   | 0     | 1000 | (BT_1759 or BT_3082)                                                                                                                                                                                                                                                                                                                                   | <i>R. thermotomasicron</i> metabolite/transport demand reaction |
| BTIOR2             | $BTcoai[c] + 2 BTb2a[c] + BTgpc5p[c] \leftrightarrow BTb[c] + BTb2a[c] + 2 BTlmp[c] + BTlmp[c]$                             | -1000 | 1000 | (BT_0429 and BT_0430)                                                                                                                                                                                                                                                                                                                                  | <i>R. thermotomasicron</i> metabolite/transport demand reaction |
| BTPOCOATA          | $BTcoai[c] + BT13apndcACP[c] \leftrightarrow BTACp[c] + BTh2a[c]$                                                           | -1000 | 1000 | BT_0789                                                                                                                                                                                                                                                                                                                                                | <i>R. thermotomasicron</i> metabolite/transport demand reaction |
| BTIPDH             | $BTlpc[c] \leftrightarrow BTlmp[c]$                                                                                         | -1000 | 1000 | BT_3972                                                                                                                                                                                                                                                                                                                                                | <i>R. thermotomasicron</i> metabolite/transport demand reaction |
| BTIPDS             | $BTb[c] + BTlmp[c] + BTb2a[c] \rightarrow BTb2a[c] + BTlmp[c] + BTlmp[c]$                                                   | 0     | 1000 | BT_2061                                                                                                                                                                                                                                                                                                                                                | <i>R. thermotomasicron</i> metabolite/transport demand reaction |
| BTIPDS2            | $BTb[c] + BTlmp[c] + BTb2a[c] \rightarrow BTb2a[c] + BTlmp[c] + BTlmp[c]$                                                   | 0     | 1000 | BT_2061                                                                                                                                                                                                                                                                                                                                                | <i>R. thermotomasicron</i> metabolite/transport demand reaction |
| BTIPM2             | $BTlmp[c] + BTlmp[c] \rightarrow BTb2a[c] + BTlmp[c] + BTb2a[c]$                                                            | 0     | 1000 | BT_1857                                                                                                                                                                                                                                                                                                                                                | <i>R. thermotomasicron</i> metabolite/transport demand reaction |
| BTIPM2r            | $BTlmp[c] + BTlmp[c] \leftrightarrow BTb[c] + BTlmp[c] + BTlmp[c]$                                                          | -1000 | 1000 | BT_1857                                                                                                                                                                                                                                                                                                                                                | <i>R. thermotomasicron</i> metabolite/transport demand reaction |
| BTIPM4r            | $BTlmp[c] \leftrightarrow BTb2a[c] + BTlmp[c]$                                                                              | -1000 | 1000 | (BT_1859 and BT_1860)                                                                                                                                                                                                                                                                                                                                  | <i>R. thermotomasicron</i> metabolite/transport demand reaction |
| BTIPM4b            | $BTb2a[c] + BTlmp[c] \leftrightarrow BTb[c] + BTlmp[c]$                                                                     | -1000 | 1000 | (BT_1859 and BT_1860)                                                                                                                                                                                                                                                                                                                                  | <i>R. thermotomasicron</i> metabolite/transport demand reaction |
| BTIPPS             | $BTb2a[c] + BTlmp[c] + BTlmp[c] \rightarrow BTb[c] + BTlmp[c] + BTlmp[c]$                                                   | 0     | 1000 | BT_1861                                                                                                                                                                                                                                                                                                                                                | <i>R. thermotomasicron</i> metabolite/transport demand reaction |
| BTIS2ASE           | $BTb2a[c] + BTlmp[c] + BTlmp[c] \rightarrow BTb[c] + BTlmp[c] + BTlmp[c]$                                                   | 0     | 1000 | (BT_0238 and BT_0756) or (BT_0238 and BT_2914)                                                                                                                                                                                                                                                                                                         | <i>R. thermotomasicron</i> metabolite/transport demand reaction |
| BTIS2ASE_H81       | $2 BTb2a[c] + BTlmp\_dgr\_2[c] \rightarrow 4 BTb[c] + BTlmp[c] + BTlmp\_dgr\_7[c]$                                          | 0     | 1000 | (BT_0238 and BT_0756) or (BT_0238 and BT_2914)                                                                                                                                                                                                                                                                                                         | <i>R. thermotomasicron</i> metabolite/transport demand reaction |
| BTISUBU2r          | $BTb[c] + BTlmp[c] \leftrightarrow BTb[c] + BTlmp[c]$                                                                       | -1000 | 1000 |                                                                                                                                                                                                                                                                                                                                                        | <i>R. thermotomasicron</i> metabolite/transport demand reaction |
| BTISOCAPR2r        | $BTb[c] + BTlmp[c] \leftrightarrow BTb[c] + BTlmp[c]$                                                                       | -1000 | 1000 |                                                                                                                                                                                                                                                                                                                                                        | <i>R. thermotomasicron</i> metabolite/transport demand reaction |
| BTISOVAL2r         | $BTb[c] + BTlmp[c] \leftrightarrow BTb[c] + BTlmp[c]$                                                                       | -1000 | 1000 |                                                                                                                                                                                                                                                                                                                                                        | <i>R. thermotomasicron</i> metabolite/transport demand reaction |
| BTITDCOATA         | $BTcoai[c] + BT12apndcACP[c] \leftrightarrow BTACp[c] + BTh2a[c]$                                                           | -1000 | 1000 | BT_0789                                                                                                                                                                                                                                                                                                                                                | <i>R. thermotomasicron</i> metabolite/transport demand reaction |
| BTIVCOATA          | $BTACp[c] + BTlmp[c] \leftrightarrow BTcoai[c] + BTlmp[c]$                                                                  | -1000 | 1000 | BT_0789                                                                                                                                                                                                                                                                                                                                                | <i>R. thermotomasicron</i> metabolite/transport demand reaction |
| BTIPZN             | $BTb2a[c] + BTlmp[c] \rightarrow BTb[c] + BTlmp[c]$                                                                         | 0     | 1000 | BT_2692                                                                                                                                                                                                                                                                                                                                                | <i>R. thermotomasicron</i> metabolite/transport demand reaction |
| BTIKAR1            | $BTlmp[c] + BT23dub[c] \leftrightarrow BTb[c] + BTlmp[c] + BTlmp[c]$                                                        | -1000 | 1000 | BT_2074                                                                                                                                                                                                                                                                                                                                                | <i>R. thermotomasicron</i> metabolite/transport demand reaction |
| BTIKAR2            | $BTb[c] + BTlmp[c] + BTlmp[c] \rightarrow BTb[c] + BTlmp[c] + BTlmp[c]$                                                     | -1000 | 1000 | BT_2074                                                                                                                                                                                                                                                                                                                                                | <i>R. thermotomasicron</i> metabolite/transport demand reaction |
| BTKAS1             | $14 BTb[c] + 10 BTlmp[c] + 5 BTlmp[c] + BTlmp[c] \rightarrow 4 BTb2a[c] + 6 BTlmp[c] + 10 BTlmp[c] + 5 BTlmp[c] + BTlmp[c]$ | 0     | 1000 | (BT_0122 and BT_3358) or (BT_3358 and BT_3834)                                                                                                                                                                                                                                                                                                         | <i>R. thermotomasicron</i> metabolite/transport demand reaction |
| BTKAS11            | $17 BTb[c] + 12 BTlmp[c] + 6 BTlmp[c] + BTlmp[c] \rightarrow 5 BTb2a[c] + 7 BTlmp[c] + 12 BTlmp[c] + 6 BTlmp[c] + BTlmp[c]$ | 0     | 1000 | (BT_0122 and BT_3358) or (BT_3358 and BT_3834)                                                                                                                                                                                                                                                                                                         | <i>R. thermotomasicron</i> metabolite/transport demand reaction |
| BTKAS12            | $17 BTb[c] + BTlmp[c] + 12 BTlmp[c] + 5 BTlmp[c] \rightarrow 5 BTb2a[c] + 7 BTlmp[c] + 12 BTlmp[c] + 6 BTlmp[c] + BTlmp[c]$ | 0     | 1000 | (BT_0122 and BT_3358) or (BT_3358 and BT_3834)                                                                                                                                                                                                                                                                                                         | <i>R. thermotomasicron</i> metabolite/transport demand reaction |
| BTKAS13            | $23 BTb[c] + 16 BTlmp[c] + BTlmp[c] + 8 BTlmp[c] \rightarrow 7 BTb2a[c] + 9 BTlmp[c] + 16 BTlmp[c] + 8 BTlmp[c] + BTlmp[c]$ | 0     | 1000 | (BT_0122 and BT_3358) or (BT_3358 and BT_3834)                                                                                                                                                                                                                                                                                                         | <i>R. thermotomasicron</i> metabolite/transport demand reaction |
| BTKAS14            | $BTb[c] + BTlmp[c] + BTlmp[c] + BTlmp[c] \rightarrow BTlmp[c] + BTlmp[c] + BTlmp[c] + BTlmp[c]$                             | 0     | 1000 | (BT_0122 and BT_3358) or (BT_3358 and BT_3834)                                                                                                                                                                                                                                                                                                         | <i>R. thermotomasicron</i> metabolite/transport demand reaction |
| BTKAS2             | $17 BTb[c] + 12 BTlmp[c] + BTlmp[c] + 6 BTlmp[c] \rightarrow 5 BTb2a[c] + 7 BTlmp[c] + 12 BTlmp[c] + 6 BTlmp[c] + BTlmp[c]$ | 0     | 1000 | (BT_0122 and BT_3358) or (BT_3358 and BT_3834)                                                                                                                                                                                                                                                                                                         | <i>R. thermotomasicron</i> metabolite/transport demand reaction |
| BTKAS3             | $14 BTb[c] + 10 BTlmp[c] + 5 BTlmp[c] + BTlmp[c] \rightarrow 4 BTb2a[c] + 6 BTlmp[c] + 10 BTlmp[c] + 5 BTlmp[c] + BTlmp[c]$ | 0     | 1000 | (BT_0122 and BT_3358) or (BT_3358 and BT_3834)                                                                                                                                                                                                                                                                                                         | <i>R. thermotomasicron</i> metabolite/transport demand reaction |
| BTKAS4             | $14 BTb[c] + BTlmp[c] + 10 BTlmp[c] + 5 BTlmp[c] \rightarrow 4 BTb2a[c] + 6 BTlmp[c] + 10 BTlmp[c] + 5 BTlmp[c] + BTlmp[c]$ | 0     | 1000 | (BT_0122 and BT_3358) or (BT_3358 and BT_3834)                                                                                                                                                                                                                                                                                                         | <i>R. thermotomasicron</i> metabolite/transport demand reaction |
| BTKAS6             | $17 BTb[c] + 12 BTlmp[c] + 6 BTlmp[c] + BTlmp[c] \rightarrow 5 BTb2a[c] + 7 BTlmp[c] + 12 BTlmp[c] + 6 BTlmp[c] + BTlmp[c]$ | 0     | 1000 | (BT_0122 and BT_3358) or (BT_3358 and BT_3834)                                                                                                                                                                                                                                                                                                         | <i>R. thermotomasicron</i> metabolite/transport demand reaction |
| BTKAS8             | $20 BTb[c] + 14 BTlmp[c] + BTlmp[c] + 7 BTlmp[c] \rightarrow 6 BTb2a[c] + 8 BTlmp[c] + 14 BTlmp[c] + 7 BTlmp[c] + BTlmp[c]$ | 0     | 1000 | (BT_0122 and BT_3358) or (BT_3358 and BT_3834)                                                                                                                                                                                                                                                                                                         | <i>R. thermotomasicron</i> metabolite/transport demand reaction |
| BTLDNH             | $BTb2a[c] + BTlmp[c] \rightarrow BTb[c] + BTlmp[c]$                                                                         | 0     | 1000 | BT_1713                                                                                                                                                                                                                                                                                                                                                | <i>R. thermotomasicron</i> metabolite/transport demand reaction |
| BTIDOC72           | $BTlmp[c] + BTlmp[c] \rightarrow BTlmp[c] + BTlmp[c]$                                                                       | 0     | 1000 | BT_0745                                                                                                                                                                                                                                                                                                                                                | <i>R. thermotomasicron</i> metabolite/transport demand reaction |
| BTIDOPP            | $BTb2a[c] + BTlmp[c] \rightarrow BTlmp[c] + BTlmp[c]$                                                                       | 0     | 1000 | (BT_1677 or BT_1713)                                                                                                                                                                                                                                                                                                                                   | <i>R. thermotomasicron</i> metabolite/transport demand reaction |
| BTIDOPS            | $BTb2a[c] + BTlmp[c] + BTlmp[c] \rightarrow BTlmp[c] + BTlmp[c]$                                                            | 0     | 1000 | BT_4321                                                                                                                                                                                                                                                                                                                                                | <i>R. thermotomasicron</i> metabolite/transport demand reaction |
| BTIDU3             | $BTlmp[c] \rightarrow BTlmp[c]$                                                                                             | 0     | 1000 | (BT_3231 or BT_4106)                                                                                                                                                                                                                                                                                                                                   | <i>R. thermotomasicron</i> metabolite/transport demand reaction |
| BTKESTOASfe        | $2 BTb2a[c] + BTlmp[c] \rightarrow BTlmp[c] + BTlmp[c]$                                                                     | 0     | 1000 | (BT_1759 or BT_3082)                                                                                                                                                                                                                                                                                                                                   | <i>R. thermotomasicron</i> metabolite/transport demand reaction |
| BTKESTOPTASfe      | $4 BTb2a[c] + BTlmp[c] \rightarrow BTlmp[c] + BTlmp[c]$                                                                     | 0     | 1000 | (BT_1759 or BT_3082)                                                                                                                                                                                                                                                                                                                                   | <i>R. thermotomasicron</i> metabolite/transport demand reaction |
| BTKESTOTRASfe      | $3 BTb2a[c] + BTlmp[c] \rightarrow BTlmp[c] + BTlmp[c]$                                                                     | 0     | 1000 | (BT_1759 or BT_3082)                                                                                                                                                                                                                                                                                                                                   | <i>R. thermotomasicron</i> metabolite/transport demand reaction |
| BTKabc             | $BTb2a[c] + BTlmp[c] + BTlmp[c] \rightarrow BTb[c] + BTlmp[c] + BTlmp[c]$                                                   | 0     | 1000 | (BT_2423 and BT_2424 and BT_2425)                                                                                                                                                                                                                                                                                                                      | <i>R. thermotomasicron</i> metabolite/transport demand reaction |
| BTKc3r             | $BTb[c] + BTlmp[c] \leftrightarrow BTb[c] + BTlmp[c]$                                                                       | -1000 | 1000 | (BT_4097 and BT_4098) or (BT_4665 and BT_4666)                                                                                                                                                                                                                                                                                                         | <i>R. thermotomasicron</i> metabolite/transport demand reaction |
| BTL2AOD2s          | $BTb2a[c] + BTlmp[c] \rightarrow BTlmp[c]$                                                                                  | 0     | 1000 |                                                                                                                                                                                                                                                                                                                                                        | <i>R. thermotomasicron</i> metabolite/transport demand reaction |
| BTACDFUCTR_FUCAsfe | $BTb2a[c] + BTlmp[c] \rightarrow BTlmp[c] + BTlmp[c]$                                                                       | 0     | 1000 | (BT_1625 or BT_4136) or (BT_4134 and BT_4135) or (BT_1630 and BT_1631)                                                                                                                                                                                                                                                                                 | <i>R. thermotomasicron</i> metabolite/transport demand reaction |
| BTACNFUCH_FUCAsfe  | $BTb2a[c] + BTlmp[c] \rightarrow BTlmp[c] + BTlmp[c]$                                                                       | 0     | 1000 | (BT_1625 or BT_4136) or (BT_4134 and BT_4135) or (BT_1630 and BT_1631)                                                                                                                                                                                                                                                                                 | <i>R. thermotomasicron</i> metabolite/transport demand reaction |
| BTACNFUCPT_FUCAsfe | $BTb2a[c] + BTlmp[c] \rightarrow BTlmp[c] + BTlmp[c]$                                                                       | 0     | 1000 | (BT_1625 or BT_4136) or (BT_4134 and BT_4135) or (BT_1630 and BT_1631)                                                                                                                                                                                                                                                                                 | <i>R. thermotomasicron</i> metabolite/transport demand reaction |
| BTACNTR_DEGe       | $2 BTb2a[c] + BTlmp[c] \rightarrow BTlmp[c] + BTlmp[c]$                                                                     | 0     | 1000 | (BT_1626 or BT_0461) or (BT_1627 or BT_1632 or BT_4132 or BT_0459 or BT_0460 or BT_1038 or BT_1044 or BT_1048 or BT_1051 or BT_4295 or BT_2825) or (BT_1630 and BT_1631) or (BT_4134 and BT_4135) or (BT_1039 and BT_1040) or (BT_1042 and BT_1043) or (BT_1046 and BT_1047) or (BT_4297 or BT_4298) or (BT_2818 and BT_2819) or (BT_2820 and BT_2821) | <i>R. thermotomasicron</i> metabolite/transport demand reaction |
| BTACZe             | $BTb2a[c] + BTlmp[c] \rightarrow BTlmp[c]$                                                                                  | 0     | 1000 | (BT_1626 or BT_4050)                                                                                                                                                                                                                                                                                                                                   | <i>R. thermotomasicron</i> metabolite/transport demand reaction |
| BTARGNAT           | $BTlmp[c] + BTlmp[c] \leftrightarrow BTb[c] + BTlmp[c] + BTlmp[c]$                                                          | -1000 | 1000 | BT_3935                                                                                                                                                                                                                                                                                                                                                | <i>R. thermotomasicron</i> metabolite/transport demand reaction |
| BTLCAR2            | $BTb[c] + BTlmp[c] + BTlmp[c] \leftrightarrow BTlmp[c] + BTlmp[c]$                                                          | -1000 | 1000 | BT_3767                                                                                                                                                                                                                                                                                                                                                | <i>R. thermotomasicron</i> metabolite/transport demand reaction |
| BTLCAR5            | $BTb[c] + BTlmp[c] + BTlmp[c] \leftrightarrow BTlmp[c] + BTlmp[c]$                                                          | -1000 | 1000 | BT_3767                                                                                                                                                                                                                                                                                                                                                | <i>R. thermotomasicron</i> metabolite/transport demand reaction |
| BTLDLD             | $BTlmp[c] + BTlmp[c] \leftrightarrow BTlmp[c] + BTlmp[c]$                                                                   | -1000 | 1000 | BT_1575                                                                                                                                                                                                                                                                                                                                                | <i>R. thermotomasicron</i> metabolite/transport demand reaction |
| BTLDL1             | $BTlmp[c] + BTlmp[c] \leftrightarrow BTlmp[c] + BTlmp[c]$                                                                   | -1000 | 1000 | (BT_4455 and BT_4456 and BT_4457)                                                                                                                                                                                                                                                                                                                      | <i>R. thermotomasicron</i> metabolite/transport demand reaction |
| BTLEGLY1c          | $BTb2a[c] + BTlmp[c] \rightarrow BTlmp[c] + BTlmp[c]$                                                                       | 0     | 1000 | (BT_3464 or BT_3928 or BT_3996 or BT_0149 or BT_4193 or BT_3254 or BT_1260 or BT_1261 or BT_1314)                                                                                                                                                                                                                                                      | <i>R. thermotomasicron</i> metabolite/transport demand reaction |
| BTLEGLYAPc         | $BTb2a[c] + BTlmp[c] \rightarrow BTlmp[c] + BTlmp[c]$                                                                       | 0     | 1000 | BT_2548                                                                                                                                                                                                                                                                                                                                                | <i>R. thermotomasicron</i> metabolite/transport demand reaction |
| BTLEGLY1r          | $BTb[c] + BTlmp[c] \rightarrow BTb[c] + BTlmp[c]$                                                                           | 0     | 1000 | (BT_0580 or BT_4385 or BT_1086)                                                                                                                                                                                                                                                                                                                        | <i>R. thermotomasicron</i> metabolite/transport demand reaction |
| BTLEL1c1c          | $BTb2a[c] + BTlmp[c] \rightarrow 2 BTlmp[c]$                                                                                | 0     | 1000 | (BT_3464 or BT_3928 or BT_3996 or BT_0149 or BT_4193 or BT_3254 or BT_1260 or BT_1261 or BT_1314)                                                                                                                                                                                                                                                      | <i>R. thermotomasicron</i> metabolite/transport demand reaction |
| BTLEL1c1APc        | $BTb2a[c] + BTlmp[c] \rightarrow 2 BTlmp[c]$                                                                                | 0     | 1000 | BT_2548                                                                                                                                                                                                                                                                                                                                                | <i>R. thermotomasicron</i> metabolite/transport demand reaction |
| BTLEL1c1c3         | $BTb[c] + BTlmp[c] \rightarrow BTb[c] + BTlmp[c]$                                                                           | 0     | 1000 | (BT_0580 or BT_4385 or BT_1086)                                                                                                                                                                                                                                                                                                                        | <i>R. thermotomasicron</i> metabolite/transport demand reaction |
| BTLEL1c3           | $2 BTb2a[c] + 3 BTlmp[c] \rightarrow BTlmp[c] + 3 BTlmp[c] + 2 BTlmp[c]$                                                    | 0     | 1000 |                                                                                                                                                                                                                                                                                                                                                        | <i>R. thermotomasicron</i> metabolite/transport demand reaction |
| BTLEL1c3r          | $BTb[c] + BTlmp[c] \leftrightarrow BTb[c] + BTlmp[c]$                                                                       | -1000 | 1000 | BT_3892                                                                                                                                                                                                                                                                                                                                                | <i>R. thermotomasicron</i> metabolite/transport demand reaction |
| BTLEL1c3r          | $BTb[c] + BTlmp[c] \leftrightarrow BTb[c] + BTlmp[c]$                                                                       | -1000 | 1000 |                                                                                                                                                                                                                                                                                                                                                        | <i>R. thermotomasicron</i> metabolite/transport demand reaction |
| BTLEVANASE_1e      | $249 BTb2a[c] + BTlmp[c] \rightarrow 250 BTlmp[c]$                                                                          | 0     | 1000 | (BT_1760 and BT_1762 and BT_1763)                                                                                                                                                                                                                                                                                                                      | <i>R. thermotomasicron</i> metabolite/transport demand reaction |
| BTLEVANASE_2e      | $BTb2a[c] + BTlmp[c] \rightarrow BTlmp[c] + BTlmp[c]$                                                                       | 0     | 1000 | (BT_1759 or BT_3082 or BT_1760)                                                                                                                                                                                                                                                                                                                        | <i>R. thermotomasicron</i> metabolite/transport demand reaction |
| BTLEVANASE_3e      | $BTb2a[c] + BTlmp[c] \rightarrow BTlmp[c] + BTlmp[c]$                                                                       | 0     | 1000 | (BT_1759 or BT_3082 or BT_1760)                                                                                                                                                                                                                                                                                                                        | <i>R. thermotomasicron</i> metabolite/transport demand reaction |

















|                |                                                                      |       |      |                                            |                                                                                         |
|----------------|----------------------------------------------------------------------|-------|------|--------------------------------------------|-----------------------------------------------------------------------------------------|
| BTmbh5qjr      | BTmbh5[e] <=> mbh5[a]                                                | -1000 | 1000 |                                            | Internal exchange reaction R: <a href="#">thermodynamic</a> <=> <a href="#">kinetic</a> |
| BTmbp5qjr      | BTmbp5[e] <=> mbp5[a]                                                | -1000 | 1000 |                                            | Internal exchange reaction R: <a href="#">thermodynamic</a> <=> <a href="#">kinetic</a> |
| BTmhr5qjr      | BTmhr5[e] <=> mhr5[a]                                                | -1000 | 1000 |                                            | Internal exchange reaction R: <a href="#">thermodynamic</a> <=> <a href="#">kinetic</a> |
| BTmsh5qjr      | BTmsh5[e] <=> msh5[a]                                                | -1000 | 1000 |                                            | Internal exchange reaction R: <a href="#">thermodynamic</a> <=> <a href="#">kinetic</a> |
| BTmnp5qjr      | BTmnp5[e] <=> mnp5[a]                                                | -1000 | 1000 |                                            | Internal exchange reaction R: <a href="#">thermodynamic</a> <=> <a href="#">kinetic</a> |
| BTmnn5qjr      | BTmnn5[e] <=> mnn5[a]                                                | -1000 | 1000 |                                            | Internal exchange reaction R: <a href="#">thermodynamic</a> <=> <a href="#">kinetic</a> |
| BTmnt5qjr      | BTmnt5[e] <=> mnt5[a]                                                | -1000 | 1000 |                                            | Internal exchange reaction R: <a href="#">thermodynamic</a> <=> <a href="#">kinetic</a> |
| BTmsh5qjr      | BTmsh5[e] <=> msh5[a]                                                | -1000 | 1000 |                                            | Internal exchange reaction R: <a href="#">thermodynamic</a> <=> <a href="#">kinetic</a> |
| BTmsh5qjr      | BTmsh5[e] <=> msh5[a]                                                | -1000 | 1000 |                                            | Internal exchange reaction R: <a href="#">thermodynamic</a> <=> <a href="#">kinetic</a> |
| BTmet-L1qjr    | BTmet-L1[e] <=> met-L1[a]                                            | -1000 | 1000 |                                            | Internal exchange reaction R: <a href="#">thermodynamic</a> <=> <a href="#">kinetic</a> |
| BTmet5qjr      | BTmet5[e] <=> met5[a]                                                | -1000 | 1000 |                                            | Internal exchange reaction R: <a href="#">thermodynamic</a> <=> <a href="#">kinetic</a> |
| BTmg2qjr       | BTmg2[e] <=> mg2[a]                                                  | -1000 | 1000 |                                            | Internal exchange reaction R: <a href="#">thermodynamic</a> <=> <a href="#">kinetic</a> |
| BTmg3qjr       | BTmg3[e] <=> mg3[a]                                                  | -1000 | 1000 |                                            | Internal exchange reaction R: <a href="#">thermodynamic</a> <=> <a href="#">kinetic</a> |
| BTmq10qjr      | BTmq10[e] <=> mq10[a]                                                | -1000 | 1000 |                                            | Internal exchange reaction R: <a href="#">thermodynamic</a> <=> <a href="#">kinetic</a> |
| BTmq11qjr      | BTmq11[e] <=> mq11[a]                                                | -1000 | 1000 |                                            | Internal exchange reaction R: <a href="#">thermodynamic</a> <=> <a href="#">kinetic</a> |
| BTmq7qjr       | BTmq7[e] <=> mq7[a]                                                  | -1000 | 1000 |                                            | Internal exchange reaction R: <a href="#">thermodynamic</a> <=> <a href="#">kinetic</a> |
| BTmq8qjr       | BTmq8[e] <=> mq8[a]                                                  | -1000 | 1000 |                                            | Internal exchange reaction R: <a href="#">thermodynamic</a> <=> <a href="#">kinetic</a> |
| BTmq9qjr       | BTmq9[e] <=> mq9[a]                                                  | -1000 | 1000 |                                            | Internal exchange reaction R: <a href="#">thermodynamic</a> <=> <a href="#">kinetic</a> |
| BTmqd5qjr      | BTmqd5[e] <=> mqd5[a]                                                | -1000 | 1000 |                                            | Internal exchange reaction R: <a href="#">thermodynamic</a> <=> <a href="#">kinetic</a> |
| BTmcqjr        | BTmc[e] <=> mc[a]                                                    | -1000 | 1000 |                                            | Internal exchange reaction R: <a href="#">thermodynamic</a> <=> <a href="#">kinetic</a> |
| BTmedact5qjr   | BTmedact5[e] <=> medact5[a]                                          | -1000 | 1000 |                                            | Internal exchange reaction R: <a href="#">thermodynamic</a> <=> <a href="#">kinetic</a> |
| BTmb4qjr       | BTmb4[e] <=> mb4[a]                                                  | -1000 | 1000 |                                            | Internal exchange reaction R: <a href="#">thermodynamic</a> <=> <a href="#">kinetic</a> |
| BTmnnqjr       | BTmnn[e] <=> mnn[a]                                                  | -1000 | 1000 |                                            | Internal exchange reaction R: <a href="#">thermodynamic</a> <=> <a href="#">kinetic</a> |
| BTm2qjr        | BTm2[e] <=> m2[a]                                                    | -1000 | 1000 |                                            | Internal exchange reaction R: <a href="#">thermodynamic</a> <=> <a href="#">kinetic</a> |
| BTa2qjr        | BTa2[e] <=> a2[a]                                                    | -1000 | 1000 |                                            | Internal exchange reaction R: <a href="#">thermodynamic</a> <=> <a href="#">kinetic</a> |
| BTogd5qjr      | BTogd5[e] <=> ogd5[a]                                                | -1000 | 1000 |                                            | Internal exchange reaction R: <a href="#">thermodynamic</a> <=> <a href="#">kinetic</a> |
| BTonqjr        | BTon[e] <=> on[a]                                                    | -1000 | 1000 |                                            | Internal exchange reaction R: <a href="#">thermodynamic</a> <=> <a href="#">kinetic</a> |
| BTpac5qjr      | BTpac5[e] <=> pac5[a]                                                | -1000 | 1000 |                                            | Internal exchange reaction R: <a href="#">thermodynamic</a> <=> <a href="#">kinetic</a> |
| BTphqjr        | BTph[e] <=> ph[a]                                                    | -1000 | 1000 |                                            | Internal exchange reaction R: <a href="#">thermodynamic</a> <=> <a href="#">kinetic</a> |
| BTpec5qjr      | BTpec5[e] <=> pec5[a]                                                | -1000 | 1000 |                                            | Internal exchange reaction R: <a href="#">thermodynamic</a> <=> <a href="#">kinetic</a> |
| BTpeck5qjr     | BTpeck5[e] <=> peck5[a]                                              | -1000 | 1000 |                                            | Internal exchange reaction R: <a href="#">thermodynamic</a> <=> <a href="#">kinetic</a> |
| BTphe-L1qjr    | BTphe-L1[e] <=> phe-L1[a]                                            | -1000 | 1000 |                                            | Internal exchange reaction R: <a href="#">thermodynamic</a> <=> <a href="#">kinetic</a> |
| BTphearg5qjr   | BTphearg5[e] <=> phearg5[a]                                          | -1000 | 1000 |                                            | Internal exchange reaction R: <a href="#">thermodynamic</a> <=> <a href="#">kinetic</a> |
| BTphen5qjr     | BTphen5[e] <=> phen5[a]                                              | -1000 | 1000 |                                            | Internal exchange reaction R: <a href="#">thermodynamic</a> <=> <a href="#">kinetic</a> |
| BTp5qjr        | BTp5[e] <=> p5[a]                                                    | -1000 | 1000 |                                            | Internal exchange reaction R: <a href="#">thermodynamic</a> <=> <a href="#">kinetic</a> |
| BTpato-R5qjr   | BTpato-R5[e] <=> pato-R5[a]                                          | -1000 | 1000 |                                            | Internal exchange reaction R: <a href="#">thermodynamic</a> <=> <a href="#">kinetic</a> |
| BTpp5qjr       | BTpp5[e] <=> pp5[a]                                                  | -1000 | 1000 |                                            | Internal exchange reaction R: <a href="#">thermodynamic</a> <=> <a href="#">kinetic</a> |
| BTprc5qjr      | BTprc5[e] <=> prc5[a]                                                | -1000 | 1000 |                                            | Internal exchange reaction R: <a href="#">thermodynamic</a> <=> <a href="#">kinetic</a> |
| BTpukh1-200qjr | BTpukh1-200[e] <=> pukh1-200[a]                                      | -1000 | 1000 |                                            | Internal exchange reaction R: <a href="#">thermodynamic</a> <=> <a href="#">kinetic</a> |
| BTpyd5qjr      | BTpyd5[e] <=> pyd5[a]                                                | -1000 | 1000 |                                            | Internal exchange reaction R: <a href="#">thermodynamic</a> <=> <a href="#">kinetic</a> |
| BTpyr5qjr      | BTpyr5[e] <=> pyr5[a]                                                | -1000 | 1000 |                                            | Internal exchange reaction R: <a href="#">thermodynamic</a> <=> <a href="#">kinetic</a> |
| BTraf5qjr      | BTraf5[e] <=> traf5[a]                                               | -1000 | 1000 |                                            | Internal exchange reaction R: <a href="#">thermodynamic</a> <=> <a href="#">kinetic</a> |
| BTthumgph5qjr  | BTthumgph5[e] <=> thumgph5[a]                                        | -1000 | 1000 |                                            | Internal exchange reaction R: <a href="#">thermodynamic</a> <=> <a href="#">kinetic</a> |
| BTthumgph5qjr  | BTthumgph5[e] <=> thumgph5[a]                                        | -1000 | 1000 |                                            | Internal exchange reaction R: <a href="#">thermodynamic</a> <=> <a href="#">kinetic</a> |
| BTth-L5qjr     | BTth-L5[e] <=> th-L5[a]                                              | -1000 | 1000 |                                            | Internal exchange reaction R: <a href="#">thermodynamic</a> <=> <a href="#">kinetic</a> |
| BTthb5qjr      | BTthb5[e] <=> thb5[a]                                                | -1000 | 1000 |                                            | Internal exchange reaction R: <a href="#">thermodynamic</a> <=> <a href="#">kinetic</a> |
| BTz2Dh2m2m5qjr | BTz2Dh2m2m5[e] <=> z2Dh2m2m5[a]                                      | -1000 | 1000 |                                            | Internal exchange reaction R: <a href="#">thermodynamic</a> <=> <a href="#">kinetic</a> |
| BTz2Dh2m2m5qjr | BTz2Dh2m2m5[e] <=> z2Dh2m2m5[a]                                      | -1000 | 1000 |                                            | Internal exchange reaction R: <a href="#">thermodynamic</a> <=> <a href="#">kinetic</a> |
| BTz_arig5qjr   | BTz_arig5[e] <=> z_arig5[a]                                          | -1000 | 1000 |                                            | Internal exchange reaction R: <a href="#">thermodynamic</a> <=> <a href="#">kinetic</a> |
| BTz_arig5qjr   | BTz_arig5[e] <=> z_arig5[a]                                          | -1000 | 1000 |                                            | Internal exchange reaction R: <a href="#">thermodynamic</a> <=> <a href="#">kinetic</a> |
| BTser-L1qjr    | BTser-L1[e] <=> ser-L1[a]                                            | -1000 | 1000 |                                            | Internal exchange reaction R: <a href="#">thermodynamic</a> <=> <a href="#">kinetic</a> |
| BTsgm5qjr      | BTsgm5[e] <=> sgm5[a]                                                | -1000 | 1000 |                                            | Internal exchange reaction R: <a href="#">thermodynamic</a> <=> <a href="#">kinetic</a> |
| BTsy5qjr       | BTsy5[e] <=> sy5[a]                                                  | -1000 | 1000 |                                            | Internal exchange reaction R: <a href="#">thermodynamic</a> <=> <a href="#">kinetic</a> |
| BTsuc5qjr      | BTsuc5[e] <=> suc5[a]                                                | -1000 | 1000 |                                            | Internal exchange reaction R: <a href="#">thermodynamic</a> <=> <a href="#">kinetic</a> |
| BTsuc5qjr      | BTsuc5[e] <=> suc5[a]                                                | -1000 | 1000 |                                            | Internal exchange reaction R: <a href="#">thermodynamic</a> <=> <a href="#">kinetic</a> |
| BTtar5qjr      | BTtar5[e] <=> tar5[a]                                                | -1000 | 1000 |                                            | Internal exchange reaction R: <a href="#">thermodynamic</a> <=> <a href="#">kinetic</a> |
| BTch5qjr       | BTch5[e] <=> ch5[a]                                                  | -1000 | 1000 |                                            | Internal exchange reaction R: <a href="#">thermodynamic</a> <=> <a href="#">kinetic</a> |
| BTthn5qjr      | BTthn5[e] <=> thn5[a]                                                | -1000 | 1000 |                                            | Internal exchange reaction R: <a href="#">thermodynamic</a> <=> <a href="#">kinetic</a> |
| BTth-L1qjr     | BTth-L1[e] <=> th-L1[a]                                              | -1000 | 1000 |                                            | Internal exchange reaction R: <a href="#">thermodynamic</a> <=> <a href="#">kinetic</a> |
| BTthm5qjr      | BTthm5[e] <=> thm5[a]                                                | -1000 | 1000 |                                            | Internal exchange reaction R: <a href="#">thermodynamic</a> <=> <a href="#">kinetic</a> |
| BTtr5qjr       | BTtr5[e] <=> tr5[a]                                                  | -1000 | 1000 |                                            | Internal exchange reaction R: <a href="#">thermodynamic</a> <=> <a href="#">kinetic</a> |
| BTtp-L1qjr     | BTtp-L1[e] <=> tp-L1[a]                                              | -1000 | 1000 |                                            | Internal exchange reaction R: <a href="#">thermodynamic</a> <=> <a href="#">kinetic</a> |
| BTtp-L1qjr     | BTtp-L1[e] <=> tp-L1[a]                                              | -1000 | 1000 |                                            | Internal exchange reaction R: <a href="#">thermodynamic</a> <=> <a href="#">kinetic</a> |
| BTundgph5qjr   | BTundgph5[e] <=> undgph5[a]                                          | -1000 | 1000 |                                            | Internal exchange reaction R: <a href="#">thermodynamic</a> <=> <a href="#">kinetic</a> |
| BTur5qjr       | BTur5[e] <=> ur5[a]                                                  | -1000 | 1000 |                                            | Internal exchange reaction R: <a href="#">thermodynamic</a> <=> <a href="#">kinetic</a> |
| BTur5qjr       | BTur5[e] <=> ur5[a]                                                  | -1000 | 1000 |                                            | Internal exchange reaction R: <a href="#">thermodynamic</a> <=> <a href="#">kinetic</a> |
| BTur5qjr       | BTur5[e] <=> ur5[a]                                                  | -1000 | 1000 |                                            | Internal exchange reaction R: <a href="#">thermodynamic</a> <=> <a href="#">kinetic</a> |
| BTval-L1qjr    | BTval-L1[e] <=> val-L1[a]                                            | -1000 | 1000 |                                            | Internal exchange reaction R: <a href="#">thermodynamic</a> <=> <a href="#">kinetic</a> |
| BTxar5qjr      | BTxar5[e] <=> xar5[a]                                                | -1000 | 1000 |                                            | Internal exchange reaction R: <a href="#">thermodynamic</a> <=> <a href="#">kinetic</a> |
| BTyx-D5qjr     | BTyx-D5[e] <=> yx-D5[a]                                              | -1000 | 1000 |                                            | Internal exchange reaction R: <a href="#">thermodynamic</a> <=> <a href="#">kinetic</a> |
| BTz2qjr        | BTz2[e] <=> z2[a]                                                    | -1000 | 1000 |                                            | Internal exchange reaction R: <a href="#">thermodynamic</a> <=> <a href="#">kinetic</a> |
| MM10FTHSGLU    | MM10Hb5g[e] -> MM10Hb5g[a]                                           | 0     | 1000 |                                            | Mouse metabolic/transport demand reaction                                               |
| MM10FTHSGLUm   | MM10Hb5g[e] -> MM10Hb5g[a]                                           | 0     | 1000 |                                            | Mouse metabolic/transport demand reaction                                               |
| MM10FTHSGLU    | MM10Hb5g[e] -> MM10Hb5g[a]                                           | 0     | 1000 |                                            | Mouse metabolic/transport demand reaction                                               |
| MM10FTHSGLUm   | MM10Hb5g[e] -> MM10Hb5g[a]                                           | 0     | 1000 |                                            | Mouse metabolic/transport demand reaction                                               |
| MM10FTH7GLU    | MM10Hb7g[e] -> MM10Hb7g[a]                                           | 0     | 1000 |                                            | Mouse metabolic/transport demand reaction                                               |
| MM10FTH7GLUm   | MM10Hb7g[e] -> MM10Hb7g[a]                                           | 0     | 1000 |                                            | Mouse metabolic/transport demand reaction                                               |
| MM10FTHU       | MM10Hb[e] <=> MM10Hb[a]                                              | -1000 | 1000 |                                            | Mouse metabolic/transport demand reaction                                               |
| MM10FTHUm      | MM10Hb[e] <=> MM10Hb[a]                                              | -1000 | 1000 |                                            | Mouse metabolic/transport demand reaction                                               |
| MM11DOCRISLm   | MM11dcsm[e] <=> MM11dcsm[a]                                          | -1000 | 1000 |                                            | Mouse metabolic/transport demand reaction                                               |
| MM11DOCRISLr   | MM11dcsm[e] <=> MM11dcsm[a]                                          | -1000 | 1000 |                                            | Mouse metabolic/transport demand reaction                                               |
| MM11DOCRISTRm  | MM11dcsm[e] <=> MM11dcsm[a]                                          | -1000 | 1000 |                                            | Mouse metabolic/transport demand reaction                                               |
| MM11DOCRISTRNr | MM11dcsm[e] <=> MM11dcsm[a]                                          | -1000 | 1000 |                                            | Mouse metabolic/transport demand reaction                                               |
| MM13DAMPOX     | MM13damp[e] + MMb2s[e] + MMb2s[e] -> MMbamp[a] + MMb2s[e] + MMb2s[e] | 0     | 1000 | 237940.1 or 237940.2 or 11754.1 or 76507.1 | Mouse metabolic/transport demand reaction                                               |
| MM1MNCAMh      | MMb2s[e] + MM1mcam[e] + MMb2s[e] -> MMb2s[e] + MMb2s[e] + MMb2s[e]   | 0     | 1000 |                                            | Mouse metabolic/transport demand reaction                                               |

|                      |                                                                                              |       |      |                                                                 |                                           |
|----------------------|----------------------------------------------------------------------------------------------|-------|------|-----------------------------------------------------------------|-------------------------------------------|
| MM1PDCRp             | MM1ppdc2[s] + MMb[s] + MMnad[s] -> MM1ppccol[s] + MMnad[s]                                   | 0     | 1000 |                                                                 | Mouse metabolic/transport demand reaction |
| MM1a_24_25VITD3hm    | MM2425dswad2[m] + MMb[m] + MMnadp[m] + MMa2[m] -> MM1a2425dswad2[m] + MMb2[m] + MMnadp[m]    | 0     | 1000 |                                                                 | Mouse metabolic/transport demand reaction |
| MM1a_24_25VITD3hm    | MMb[m] + MMnadp[m] + MMa2[m] + MM2425dswad3[m] -> MMb2[m] + MMnadp[m] + MM1a2425dswad3[m]    | 0     | 1000 |                                                                 | Mouse metabolic/transport demand reaction |
| MM1a_25VITD3hm       | MMb[m] + MMnadp[m] + MMa2[m] + MM1a25dswad2[m] -> MM1a2425dswad2[m] + MMb2[m] + MMnadp[m]    | 0     | 1000 |                                                                 | Mouse metabolic/transport demand reaction |
| MM1a_25VITD3hm       | MMb[m] + MMnadp[m] + MMa2[m] + MM1a25dswad3[m] -> MMb2[m] + MMnadp[m] + MM1a2425dswad3[m]    | 0     | 1000 |                                                                 | Mouse metabolic/transport demand reaction |
| MM26NPRb             | MM24upb[c] -> MM24upb[c]                                                                     | 0     | 1000 |                                                                 | Mouse metabolic/transport demand reaction |
| MM24_25DHVITD2i      | MM2425dswad2[c] -> MM2425dswad2[c]                                                           | 0     | 1000 |                                                                 | Mouse metabolic/transport demand reaction |
| MM24_25DHVITD2m      | MM2425dswad2[m] -> MM2425dswad2[c]                                                           | 0     | 1000 |                                                                 | Mouse metabolic/transport demand reaction |
| MM24_25DHVITD3i      | MM2425dswad3[c] -> MM2425dswad3[c]                                                           | 0     | 1000 |                                                                 | Mouse metabolic/transport demand reaction |
| MM24_25DHVITD3m      | MM2425dswad3[m] -> MM2425dswad3[c]                                                           | 0     | 1000 |                                                                 | Mouse metabolic/transport demand reaction |
| MM24_25VITD2hm       | MMb[m] + MMnadp[m] + MMa2[m] + MM25dswad2[m] -> MM2425dswad2[m] + MMb2[m] + MMnadp[m]        | 0     | 1000 | 1308.1                                                          | Mouse metabolic/transport demand reaction |
| MM24_25VITD3hm       | MMb[m] + MMnadp[m] + MMa2[m] + MM25dswad3[m] -> MMb2[m] + MMnadp[m] + MM2425dswad3[m]        | 0     | 1000 | 1308.1                                                          | Mouse metabolic/transport demand reaction |
| MM25HVITD2i          | MM25dswad2[c] -> MM25dswad2[c]                                                               | 0     | 1000 |                                                                 | Mouse metabolic/transport demand reaction |
| MM25HVITD2m          | MM25dswad2[c] -> MM25dswad2[c]                                                               | 0     | 1000 |                                                                 | Mouse metabolic/transport demand reaction |
| MM25HVITD2m          | MM25dswad2[c] -> MM25dswad2[m]                                                               | 0     | 1000 |                                                                 | Mouse metabolic/transport demand reaction |
| MM25HVITD2m          | MM25dswad2[m] -> MM25dswad2[c]                                                               | 0     | 1000 |                                                                 | Mouse metabolic/transport demand reaction |
| MM25HVITD2i          | MM25dswad3[c] -> MM25dswad3[c]                                                               | 0     | 1000 |                                                                 | Mouse metabolic/transport demand reaction |
| MM25HVITD3i          | MM25dswad3[m] -> MM25dswad3[c]                                                               | 0     | 1000 | (14473.1 and 14725.1 and 65969.1)                               | Mouse metabolic/transport demand reaction |
| MM25HVITD3m          | MM25dswad3[c] -> MM25dswad3[c]                                                               | 0     | 1000 |                                                                 | Mouse metabolic/transport demand reaction |
| MM25HVITD3m          | MM25dswad3[m] -> MM25dswad3[c]                                                               | 0     | 1000 |                                                                 | Mouse metabolic/transport demand reaction |
| MM25VITD2hm          | MMb[m] + MMnadp[m] + MMa2[m] + MM25dswad2[m] -> MMb2[m] + MMnadp[m] + MM1a25dswad2[m]        | 0     | 1000 | 13115.1                                                         | Mouse metabolic/transport demand reaction |
| MM25VITD3hm          | MMb[m] + MMnadp[m] + MMa2[m] + MM25dswad3[m] -> MMb2[m] + MMnadp[m] + MM1a25dswad3[m]        | 0     | 1000 | 13115.1                                                         | Mouse metabolic/transport demand reaction |
| MM2AMACHYD           | MMb2o[c] + MM2amc[c] -> MMab4[c] + MMp9[c]                                                   | 0     | 1000 |                                                                 | Mouse metabolic/transport demand reaction |
| MM2AMACHULT          | MM2amc[c] + MMnadp[c] + MMpp9[c] -> MM1cys[c] + MMnadp[c] + MMpp9[c]                         | 0     | 1000 |                                                                 | Mouse metabolic/transport demand reaction |
| MM2AMADPTm           | MM12adp[c] + MMakg[m] -> MMakg[c] + MM12adp[m]                                               | -1000 | 1000 | 217593.1                                                        | Mouse metabolic/transport demand reaction |
| MM2BR1PP             | MMb2o[c] + MM24r1p[c] -> MMp1[c] + MMab4[c]                                                  | 0     | 1000 |                                                                 | Mouse metabolic/transport demand reaction |
| MM2BR1b2             | MM24b1[c] + MMb1e[c] -> MMb1[c] + MM24b1[c]                                                  | 0     | 1000 | 20503.1 or 80879.1 or 20501.1                                   | Mouse metabolic/transport demand reaction |
| MM2HC03_NA           | 2 MMbco3[c] + MMma1[c] -> 2 MMbco3[c] + MMma1[c]                                             | 0     | 1000 | 232156.1 or 232156.2 or 232156.3 or 54403.1 or 232156.4         | Mouse metabolic/transport demand reaction |
| MM2MCTi              | MM2mct[c] -> MM2mct[c]                                                                       | -1000 | 0    |                                                                 | Mouse metabolic/transport demand reaction |
| MM2OXAOXOm           | MM2oxadp[m] + MMcso[m] + MMma[m] -> MMcso2[m] + MMma2o[m] + MMab4o[m]                        | 0     | 1000 | 78920.1 or 18293.1 or (27402.1 and 13382.1) or 18293.2          | Mouse metabolic/transport demand reaction |
| MM2OXADPTm           | MMakg[m] + MM2oxadp[c] -> MMakg[c] + MM2oxadp[m]                                             | -1000 | 1000 | 217593.1                                                        | Mouse metabolic/transport demand reaction |
| MM34DHXPGEt          | MM34dhxpeg[c] -> MM34dhxpeg[c]                                                               | -1000 | 0    |                                                                 | Mouse metabolic/transport demand reaction |
| MM34DHXPGEt          | MM34dhxpeg[c] + MManc[c] -> MMb1[c] + MMakg[c] + MMb2o[c]                                    | 0     | 1000 | 12846.1 or 12846.2                                              | Mouse metabolic/transport demand reaction |
| MM34DHPLAT1c         | MM34dhplc[c] + MMb1o-1[c] -> MM34dhplc[c] + MMb1o-1[m]                                       | 0     | 1000 | (20539.1 and 17254.1)                                           | Mouse metabolic/transport demand reaction |
| MM34DHPLACOX         | MMb2o[c] + MMnad[c] + MM34dhplc[c] -> 2 MMb1[c] + MM34dhplc[c] + MMab4o[m]                   | 0     | 1000 | 11670.1 or 67689.1 or 56847.1                                   | Mouse metabolic/transport demand reaction |
| MM34DHPLACOX_NADP    | MMb2o[c] + MMnad[c] + MM34dhplc[c] -> 2 MMb1[c] + MMnadp[c] + MM34dhplc[c]                   | -1000 | 1000 | 11670.1 or 67689.1 or 56847.1                                   | Mouse metabolic/transport demand reaction |
| MM34DHMANDACOX       | MMb2o[c] + MMnad[c] + MM34dhplc[c] -> 2 MMb1[c] + MMnadp[c] + MM34dhplc[c]                   | 0     | 1000 | 11670.1 or 67689.1 or 56847.1                                   | Mouse metabolic/transport demand reaction |
| MM34DHMANDACOX_NADP  | MMb2o[c] + MMnadp[c] + MM34dhplc[c] -> 2 MMb1[c] + MMnadp[c] + MM34dhplc[c]                  | -1000 | 1000 | 11670.1 or 67689.1 or 56847.1                                   | Mouse metabolic/transport demand reaction |
| MM34HPLFM            | MMb1[m] + MMnadp[m] + MM34hplm[c] -> MMb1o[m] + MMnadp[m]                                    | 0     | 1000 |                                                                 | Mouse metabolic/transport demand reaction |
| MM34HPPOR            | MMb2o[c] + MM34hplp[c] -> MMcso2[c] + MMb2o[m] + MMb2o[c]                                    | 0     | 1000 | 15445.1                                                         | Mouse metabolic/transport demand reaction |
| MM35CCAPm            | MM35capp[c] -> MM35capp[m]                                                                   | -1000 | 1000 |                                                                 | Mouse metabolic/transport demand reaction |
| MM3AIBTm             | MM24mp[m] + MMg1o-1[m] -> MMakg[m] + MM3ab[m]                                                | -1000 | 1000 | 268860.2 or 268860.1                                            | Mouse metabolic/transport demand reaction |
| MM3AIBb              | MM3ab[c] -> MM3ab[c]                                                                         | 0     | 1000 |                                                                 | Mouse metabolic/transport demand reaction |
| MM3AIBm              | MM24mp[m] + MMg1o-1[m] -> MMakg[m] + MM3ab[m]                                                | -1000 | 1000 | 268860.2 or 268860.1                                            | Mouse metabolic/transport demand reaction |
| MM3OPHH1             | MMb1[m] + MMa2[m] + MMnadp[m] + MM34hplm[c] -> MMb2o[m] + MMnadp[m] + MM34hplm[c]            | 0     | 1000 |                                                                 | Mouse metabolic/transport demand reaction |
| MM3OPHH2             | MMb1[m] + MMnadp[m] + MMa2[m] + MM34hplm[c] -> MMb2o[m] + MMnadp[m] + MM34hplm[c]            | 0     | 1000 |                                                                 | Mouse metabolic/transport demand reaction |
| MM3OPPR              | MMb1[c] + MMnadp[c] + MM34hplp[c] -> MMnadp[c] + MMb2o[c] + MMb2o[c]                         | 0     | 1000 | 70750.1                                                         | Mouse metabolic/transport demand reaction |
| MM3H1AO              | MMb2o[c] + MM3h1a[m] -> MMb1[c] + MMcsoa[c]                                                  | 0     | 1000 | 107766.1                                                        | Mouse metabolic/transport demand reaction |
| MM3HBCOm             | MMb2o[m] + MMb3co[m] -> MMb3co-1[m]                                                          | -1000 | 1000 | 52430.1                                                         | Mouse metabolic/transport demand reaction |
| MM3HBCOAEam          | MMb2o[m] + MM3hbcoc[m] -> MMb1[m] + MMcsoa[m] + MM3hbc[m]                                    | 0     | 1000 |                                                                 | Mouse metabolic/transport demand reaction |
| MM3HC03_NA           | 3 MMbco3[c] + MMma1[c] -> 2 MMbco3[c] + MMma1[c]                                             | 0     | 1000 | 232156.1 or 232156.2 or 232156.3 or 54403.1 or 232156.4         | Mouse metabolic/transport demand reaction |
| MM3HKYNAGAT          | MMakg[c] + MMb1cys[c] -> MM24AHP24B1[c] + MMg1o-1[c]                                         | 0     | 1000 | 23923.1 or 70266.1 or 23923.2                                   | Mouse metabolic/transport demand reaction |
| MM3HLYLCL            | MMb1[c] + MM34dhplc[c] -> MMcso2[c] + MMb2o[c]                                               | 0     | 1000 | 13195.1                                                         | Mouse metabolic/transport demand reaction |
| MM3HPCOAHYD          | MMb2o[c] + MM3hpcoc[c] -> MMb1[c] + MM3hpcoc[c] + MMcsoa[c]                                  | 0     | 1000 | 227095.1 or 227095.2                                            | Mouse metabolic/transport demand reaction |
| MM3HPPD              | MMnad[c] + MM3hplp[c] -> MMb1[c] + MMnadp[c] + MMnadp[c]                                     | -1000 | 1000 |                                                                 | Mouse metabolic/transport demand reaction |
| MM3HXYNDCL           | MMb1[c] + MMb1cys[c] -> MMcso2[c] + MMb1cys[m] + MMb1cys[c]                                  | 0     | 1000 | 13195.1                                                         | Mouse metabolic/transport demand reaction |
| MM3HXYNOXD1A         | MMb2o[c] + MM3hxyoc[c] -> MMb2o2[c] + MMab4[c] + MM34dhxpeg[m]                               | 0     | 1000 | 109731.1 or 17161.1                                             | Mouse metabolic/transport demand reaction |
| MM3HXYNDPAC          | MMb2o[c] + MMnad[c] + MM3hxyoc[c] -> 2 MMb1[c] + MMb2o[m] + MMnadp[c]                        | -1000 | 1000 | 11670.1 or 67689.1 or 56847.1                                   | Mouse metabolic/transport demand reaction |
| MM3ML2Au             | MM3mla[c] -> MM3mla[c]                                                                       | -1000 | 0    |                                                                 | Mouse metabolic/transport demand reaction |
| MM3MOR2m             | MMb1[c] + MM3mrb[c] -> MMb1[m] + MM3mrb[m]                                                   | 0     | 1000 |                                                                 | Mouse metabolic/transport demand reaction |
| MM3MOR2m             | MMb1[c] + MM3mrb[c] -> MMb1[m] + MM3mrb[m]                                                   | 0     | 1000 |                                                                 | Mouse metabolic/transport demand reaction |
| MM3MOX4HXPALDOX      | MMb2o[c] + MMnad[c] + MM3mrb[c] -> 2 MMb1[c] + MMnadp[c] + MM3mrb[c]                         | 0     | 1000 | 11670.1 or 67689.1 or 56847.1                                   | Mouse metabolic/transport demand reaction |
| MM3MOX4HXPALDOX_NADP | MMb2o[c] + MMnadp[c] + MM3mrb[c] -> 2 MMb1[c] + MMnadp[c] + MM3mrb[c]                        | -1000 | 1000 | 212647.1 or 212647.2                                            | Mouse metabolic/transport demand reaction |
| MM3MOXYTROX          | MMb2o[c] + MMcso2[c] + MM3mrb[c] -> MMb2o2[c] + MMab4[c] + MM3mrb[c]                         | 0     | 1000 | 109731.1 or 17161.1                                             | Mouse metabolic/transport demand reaction |
| MM3INTD7i            | MM3amp[m] + MMb2o2[m] -> MMadp[m] + MMp9[m]                                                  | 0     | 1000 | 11432.1                                                         | Mouse metabolic/transport demand reaction |
| MM3SALAASPm          | MMamp-1[c] + MM3sal[m] -> MM3sal[c] + MMamp-1[m]                                             | -1000 | 1000 | 78830.1 or 50799.1                                              | Mouse metabolic/transport demand reaction |
| MM3SALACBOX1         | MMb1[c] + MM3salb[c] -> MMcso2[c] + MMb1p9[c]                                                | 0     | 1000 | 246277.1 or 14415.1 or 14417.1 or 14415.2                       | Mouse metabolic/transport demand reaction |
| MM3SALAOX            | MMb2o[c] + 2 MMb1[c] + 2 MM3salb[c] -> 2 MMb1cys[c]                                          | 0     | 1000 |                                                                 | Mouse metabolic/transport demand reaction |
| MM3SALAT1A           | MMb1[c] + MMab4[c] + MM3salb[c] -> MMab4-1[c] + MM3salp[c]                                   | 0     | 1000 | 14718.1                                                         | Mouse metabolic/transport demand reaction |
| MM3SALAT1Am          | MMb1[m] + MMakg[m] + MM3salb[m] -> MMg1o-1[m] + MM3salp[m]                                   | 0     | 1000 | 14719.1                                                         | Mouse metabolic/transport demand reaction |
| MM3SPVRSF            | MMb2o[c] + MM3supp[c] -> MMb1[c] + MMp9[c] + MMab4[c]                                        | 0     | 1000 |                                                                 | Mouse metabolic/transport demand reaction |
| MM3SPVRSpm           | MMb2o[m] + MM3supp[m] -> MMb1[m] + MMp9[m] + MMab4[m]                                        | 0     | 1000 |                                                                 | Mouse metabolic/transport demand reaction |
| MM41R1H2MAI12BOOX    | MMb2o[c] + MMcso2[c] + MMab4[c] -> MMb2o2[c] + MMab4[c] + MM34dhplc[c]                       | 0     | 1000 | 109731.1 or 17161.1                                             | Mouse metabolic/transport demand reaction |
| MM41R2AIH12BOOX      | MMb2o[c] + MMcso2[c] + MMab4[c] -> MMb2o2[c] + MMab4[c] + MM34dhplc[c]                       | 0     | 1000 | 109731.1 or 17161.1                                             | Mouse metabolic/transport demand reaction |
| MM42AI2BOOX          | MMb2o[c] + MMcso2[c] + MMab4[c] -> MMb2o2[c] + MMab4[c] + MM34dhplc[c]                       | 0     | 1000 | 27940.1 or 109731.1 or 17161.1 or 27940.2 or 11754.1 or 76097.1 | Mouse metabolic/transport demand reaction |
| MM4AIBUTm            | MM4ab1[c] -> MM4ab1[m]                                                                       | -1000 | 1000 |                                                                 | Mouse metabolic/transport demand reaction |
| MM4HBCOAFm           | MMb2o[m] + MMcsoa[m] + MMnad[m] + MMcsoa[m] -> MMb1[m] + MMnadp[m] + MM4hbcoc[m] + MMaccu[m] | 0     | 1000 |                                                                 | Mouse metabolic/transport demand reaction |
| MM4HBC2m             | MMb2o[m] + MM4hbcoc[m] -> MMb1[m] + MMcsoa[m] + MM4hbc[m]                                    | 0     | 1000 |                                                                 | Mouse metabolic/transport demand reaction |
| MM4HBC2m             | MM4hbcoc[m] -> MM4hbcoc[m]                                                                   | 0     | 1000 |                                                                 | Mouse metabolic/transport demand reaction |







|                  |                                                                      |       |      |                                                                                                            |                                              |
|------------------|----------------------------------------------------------------------|-------|------|------------------------------------------------------------------------------------------------------------|----------------------------------------------|
| MMALADGLeNoR     | MMgls-L[c] + MMals-D[e] <=> MMals-D[e] + MMgls-L[e]                  | -1000 | 1000 | 53896.1 or 17254.1                                                                                         | Moose metabolic/transport demand<br>reaction |
| MMALADGLeNoR     | MMals-D[e] + MMgls[e] <=> MMals-D[e] + MMgls[e]                      | -1000 | 1000 | 53896.1 or 17254.1                                                                                         | Moose metabolic/transport demand<br>reaction |
| MMALADPAte       | MMh[e] + MMals-D[e] -> MMh[e] + MMals-D[e]                           | 0     | 1000 | 215335.1                                                                                                   | Moose metabolic/transport demand<br>reaction |
| MMALAGLeNoR      | MMm[e] + MMals-L[e] + MMgls-L[e] -> MMm[e] + MMals-L[e] + MMgls-L[e] | 0     | 1000 | 20514.1                                                                                                    | Moose metabolic/transport demand<br>reaction |
| MMALAGLeNoR      | MMals-L[e] + MMgls-L[e] <=> MMals-L[e] + MMgls-L[e]                  | -1000 | 1000 | 53896.1 or 17254.1                                                                                         | Moose metabolic/transport demand<br>reaction |
| MMALAGLeNoR      | MMals-L[e] + MMgls[e] <=> MMals-L[e] + MMgls[e]                      | -1000 | 1000 | 53896.1 or 17254.1                                                                                         | Moose metabolic/transport demand<br>reaction |
| MMALALEAT2c      | MMals-L[e] + MMh-L[e] -> MMals-L[e] + MMh-L[e]                       | 0     | 1000 | (20539.1 and 17254.1)                                                                                      | Moose metabolic/transport demand<br>reaction |
| MMALALPAte       | MMh[e] + MMals-L[e] -> MMh[e] + MMals-L[e]                           | 0     | 1000 | 215335.1                                                                                                   | Moose metabolic/transport demand<br>reaction |
| MMALAPBELAT2c    | MMals-L[e] + MMgls-L[e] -> MMals-L[e] + MMgls-L[e]                   | 0     | 1000 | (20539.1 and 17254.1)                                                                                      | Moose metabolic/transport demand<br>reaction |
| MMALAR           | MMals-L[e] <=> MMals-D[e]                                            | -1000 | 1000 | 114863.1                                                                                                   | Moose metabolic/transport demand<br>reaction |
| MMALASERNaEs     | MMm[e] + MMals-L[e] + MMter-L[e] -> MMm[e] + MMals-L[e] + MMter-L[e] | 0     | 1000 | 20514.1 or 55963.1                                                                                         | Moose metabolic/transport demand<br>reaction |
| MMALASm          | MMh[n] + MMgls[n] + MMscos[n] -> MMscos[n] + MMh[n] + MMscos[n]      | 0     | 1000 | 26912.1 or 11655.1 or 11656.1 or 11655.2                                                                   | Moose metabolic/transport demand<br>reaction |
| MMALATA_L        | MMh[e] + MMals-L[e] <=> MMh[e] + MMals-L[e]                          | -1000 | 1000 | 40882.1 or 76282.1                                                                                         | Moose metabolic/transport demand<br>reaction |
| MMALATHRNaEs     | MMh[e] + MMals-L[e] + MMh-L[e] -> MMh[e] + MMals-L[e] + MMh-L[e]     | 0     | 1000 | 20514.1 or 55963.1                                                                                         | Moose metabolic/transport demand<br>reaction |
| MMALAc2          | MMh[e] + MMals-L[e] <=> MMh[e] + MMals-L[e]                          | 0     | 1000 | 215335.1                                                                                                   | Moose metabolic/transport demand<br>reaction |
| MMALAGL          | MMh[e] + MMals-L[e] <=> MMh[e] + MMals-L[e]                          | -1000 | 1000 | 215335.1                                                                                                   | Moose metabolic/transport demand<br>reaction |
| MMALAA           | MMm[e] + MMals-L[e] -> MMm[e] + MMals-L[e]                           | 0     | 1000 | 105727.1 or 67760.1 or 69354.1 or 56774.1 or 11989.1 or 11988.1 or 11987.1                                 | Moose metabolic/transport demand<br>reaction |
| MMALAAh          | MMm[e] + MMals-L[e] -> MMm[e] + MMals-L[e]                           | 0     | 1000 | (7008.1 or 74338.1 and 57394.1)                                                                            | Moose metabolic/transport demand<br>reaction |
| MMALAN1          | MMh[c] + 2 MMm[e] + MMals-L[e] <=> MMh[c] + 2 MMm[e] + MMals-L[e]    | -1000 | 1000 | 209837.1 or 76257.1                                                                                        | Moose metabolic/transport demand<br>reaction |
| MMALALATb        | MMm[e] + MMals-L[e] + MMarg-L[e] -> MMm[e] + MMals-L[e] + MMarg-L[e] | 0     | 1000 | (20540.1 or 330836.1 and 17254.1)                                                                          | Moose metabolic/transport demand<br>reaction |
| MMALALATb        | MMh[e] + MMals-L[e] + MMarg-L[e] -> MMh[e] + MMals-L[e] + MMarg-L[e] | 0     | 1000 | (20540.1 or 330836.1 and 17254.1)                                                                          | Moose metabolic/transport demand<br>reaction |
| MMALCD3f         | MMm[e] + MMh[e] -> MMh[e] + MMm[e]                                   | 0     | 1000 | 58810.1 or 58810.2                                                                                         | Moose metabolic/transport demand<br>reaction |
| MMALDD19s        | MMh2[e] + MMm[e] + MMscos[e] -> 2 MMh[e] + MMm[e] + MMscos[e]        | 0     | 1000 | 11670.1 or 67689.1 or 56847.1                                                                              | Moose metabolic/transport demand<br>reaction |
| MMALDD19p9       | MMh2[e] + MMm[e] + MMscos[e] -> 2 MMh[e] + MMm[e] + MMscos[e]        | 0     | 1000 | 11670.1 or 67689.1 or 56847.1                                                                              | Moose metabolic/transport demand<br>reaction |
| MMALDD20s        | MMh2[e] + MMm[e] + MMscos[e] -> 2 MMh[e] + MMm[e] + MMscos[e]        | 0     | 1000 | 19378.1 or 56752.1 or 11095.1 or 11668.1 or 11671.1 or 19378.2 or 19378.3                                  | Moose metabolic/transport demand<br>reaction |
| MMALDD20m        | MMh2[e] + MMm[e] + MMscos[e] -> 2 MMh[e] + MMm[e] + MMscos[e]        | 0     | 1000 | 212647.1 or 11669.1 or 212647.2 or 72535.1                                                                 | Moose metabolic/transport demand<br>reaction |
| MMALDD21         | MMh2[e] + MMm[e] + MMscos[e] -> 2 MMh[e] + MMm[e] + MMscos[e]        | 0     | 1000 | 11671.1                                                                                                    | Moose metabolic/transport demand<br>reaction |
| MMALDD2s         | MMh2[e] + MMm[e] + MMscos[e] -> 2 MMh[e] + MMm[e] + MMscos[e]        | 0     | 1000 | 19378.1 or 56752.1 or 11671.1 or 11095.1 or 67689.1 or 56847.1 or 11668.1 or 11671.1 or 19378.2 or 19378.3 | Moose metabolic/transport demand<br>reaction |
| MMALDD2m         | MMh2[e] + MMm[e] + MMscos[e] -> 2 MMh[e] + MMm[e] + MMscos[e]        | 0     | 1000 | 11669.1 or 72535.1                                                                                         | Moose metabolic/transport demand<br>reaction |
| MMALDD2y         | MMh2[e] + MMm[e] + MMscos[e] -> 2 MMh[e] + MMm[e] + MMscos[e]        | 0     | 1000 | 19378.1 or 56752.1 or 11671.1 or 67689.1 or 11671.1 or 19378.2 or 19378.3                                  | Moose metabolic/transport demand<br>reaction |
| MMALDSTRNe       | MMh2[e] <=> MMh2[e]                                                  | -1000 | 0    |                                                                                                            | Moose metabolic/transport demand<br>reaction |
| MMALDSTRNm       | MMh2[e] <=> MMh2[e]                                                  | -1000 | 1000 |                                                                                                            | Moose metabolic/transport demand<br>reaction |
| MMALINOFAPpnt    | MMh2[e] -> MMh2[e]                                                   | 0     | 1000 | (14719.1 or 12491.1)                                                                                       | Moose metabolic/transport demand<br>reaction |
| MMALKP           | MMh2[e] + MMh2[e] -> MMh2[e] + MMh2[e]                               | 0     | 1000 | 11647.1 or 11650.1 or 76768.1                                                                              | Moose metabolic/transport demand<br>reaction |
| MMALOX12         | MMh2[e] + MMh2[e] -> MMh2[e] + MMh2[e]                               | 0     | 1000 | 11684.1                                                                                                    | Moose metabolic/transport demand<br>reaction |
| MMALOX12R        | MMh2[e] + MMh2[e] -> MMh2[e] + MMh2[e]                               | 0     | 1000 | 11686.1                                                                                                    | Moose metabolic/transport demand<br>reaction |
| MMALOX15         | MMh2[e] + MMh2[e] -> MMh2[e] + MMh2[e]                               | 0     | 1000 | 11687.1 or 11688.1                                                                                         | Moose metabolic/transport demand<br>reaction |
| MMALOX5          | MMh2[e] + MMh2[e] -> MMh2[e] + MMh2[e]                               | 0     | 1000 | 11689.1                                                                                                    | Moose metabolic/transport demand<br>reaction |
| MMALOX52         | MMh2[e] + MMh2[e] -> MMh2[e] + MMh2[e]                               | 0     | 1000 | 11689.1                                                                                                    | Moose metabolic/transport demand<br>reaction |
| MMALR            | MMh2[e] + MMh2[e] + MMh2[e] -> 2 MMh2[e] + MMh2[e]                   | 0     | 1000 | 11677.1                                                                                                    | Moose metabolic/transport demand<br>reaction |
| MMALR2           | MMh2[e] + MMh2[e] + MMh2[e] -> 2 MMh2[e] + MMh2[e]                   | 0     | 1000 | 110198.1 or 58810.2 or 11677.1 or 58810.1                                                                  | Moose metabolic/transport demand<br>reaction |
| MMALR3           | MMh2[e] + MMh2[e] + MMh2[e] -> 2 MMh2[e] + MMh2[e]                   | 0     | 1000 | 110198.1 or 58810.2 or 11677.1 or 58810.1                                                                  | Moose metabolic/transport demand<br>reaction |
| MMAM6AD          | MMh2[e] + MMh2[e] + MMh2[e] -> 2 MMh2[e] + MMh2[e]                   | 0     | 1000 |                                                                                                            | Moose metabolic/transport demand<br>reaction |
| MMAMAC2p         | 0.5 MMh2[e] + MMh2[e] + MMh2[e] -> MMh2[e] + MMh2[e] + MMh2[e]       | 0     | 1000 | 17117.1 or 17117.2                                                                                         | Moose metabolic/transport demand<br>reaction |
| MMAMACR2s        | MMh2[e] + MMh2[e] + MMh2[e] -> MMh2[e] + MMh2[e] + MMh2[e]           | 0     | 1000 | 17117.1 or 17117.2                                                                                         | Moose metabolic/transport demand<br>reaction |
| MMAMACRp         | MMh2[e] + MMh2[e] + MMh2[e] -> MMh2[e] + MMh2[e] + MMh2[e]           | 0     | 1000 | 17117.1 or 17117.2                                                                                         | Moose metabolic/transport demand<br>reaction |
| MMAMACRr         | MMh2[e] + MMh2[e] + MMh2[e] -> MMh2[e] + MMh2[e] + MMh2[e]           | 0     | 1000 | 17117.1 or 17117.2                                                                                         | Moose metabolic/transport demand<br>reaction |
| MMAMANK          | MMh2[e] + MMh2[e] -> MMh2[e] + MMh2[e]                               | 0     | 1000 | 50796.1 or 56747.1                                                                                         | Moose metabolic/transport demand<br>reaction |
| MMAMCOXO         | MMh2[e] + MMh2[e] + MMh2[e] -> MMh2[e] + MMh2[e] + MMh2[e]           | 0     | 1000 |                                                                                                            | Moose metabolic/transport demand<br>reaction |
| MMAMETb          | MMh2[e] <=> MMh2[e]                                                  | -1000 | 1000 |                                                                                                            | Moose metabolic/transport demand<br>reaction |
| MMAMET2m         | MMh2[e] + MMh2[e] <=> MMh2[e] + MMh2[e]                              | -1000 | 1000 | 67582.1 or 67582.2 or 67582.3                                                                              | Moose metabolic/transport demand<br>reaction |
| MMAMETm          | MMh2[e] <=> MMh2[e]                                                  | -1000 | 1000 |                                                                                                            | Moose metabolic/transport demand<br>reaction |
| MMAMPDA          | MMh2[e] + MMh2[e] + MMh2[e] -> MMh2[e] + MMh2[e] + MMh2[e]           | 0     | 1000 | 109674.1 or 11717.1 or 109674.2 or 229663.1 or 109674.3                                                    | Moose metabolic/transport demand<br>reaction |
| MMAMPTASECG      | MMh2[e] + MMh2[e] -> MMh2[e] + MMh2[e]                               | 0     | 1000 | 16790.1                                                                                                    | Moose metabolic/transport demand<br>reaction |
| MMAMPTASECGe     | MMh2[e] + MMh2[e] -> MMh2[e] + MMh2[e]                               | 0     | 1000 | 16790.1                                                                                                    | Moose metabolic/transport demand<br>reaction |
| MMAMPp           | MMh2[e] <=> MMh2[e]                                                  | -1000 | 1000 |                                                                                                            | Moose metabolic/transport demand<br>reaction |
| MMAMPp           | MMh2[e] <=> MMh2[e]                                                  | -1000 | 1000 |                                                                                                            | Moose metabolic/transport demand<br>reaction |
| MMAMY1e          | 8 MMh2[e] + MMh2[e] -> 8 MMh2[e] + MMh2[e]                           | 0     | 1000 | 100043684.1 or 20532.1 and 30962.1 or 17254.1 or 11722.1 or 100043684.2                                    | Moose metabolic/transport demand<br>reaction |
| MMAMY2s          | 8 MMh2[e] + MMh2[e] -> 8 MMh2[e] + MMh2[e]                           | 0     | 1000 | 100043684.1 or 20532.1 and 30962.1 or 17254.1 or 11722.1 or 100043684.2                                    | Moose metabolic/transport demand<br>reaction |
| MMANDRSTRNGLCr   | MMh2[e] + MMh2[e] + MMh2[e] -> MMh2[e] + MMh2[e] + MMh2[e]           | 0     | 1000 | 17250.1                                                                                                    | Moose metabolic/transport demand<br>reaction |
| MMANDRSTRNGLCr   | MMh2[e] + MMh2[e] + MMh2[e] -> MMh2[e] + MMh2[e] + MMh2[e]           | -1000 | 1000 |                                                                                                            | Moose metabolic/transport demand<br>reaction |
| MMANDRSTRNe      | MMh2[e] <=> MMh2[e]                                                  | 0     | 1000 |                                                                                                            | Moose metabolic/transport demand<br>reaction |
| MMANDRSTRNm      | MMh2[e] <=> MMh2[e]                                                  | -1000 | 1000 |                                                                                                            | Moose metabolic/transport demand<br>reaction |
| MMANTIPPYR2E2s   | MMh2[e] <=> MMh2[e]                                                  | 0     | 1000 |                                                                                                            | Moose metabolic/transport demand<br>reaction |
| MMAOBU7Dm        | MMh2[e] + MMh2[e] -> MMh2[e] + MMh2[e]                               | 0     | 1000 |                                                                                                            | Moose metabolic/transport demand<br>reaction |
| MMAP4AH          | MMh2[e] + MMh2[e] -> MMh2[e] + MMh2[e]                               | 0     | 1000 | 66401.1 or 66401.2 or 66401.3                                                                              | Moose metabolic/transport demand<br>reaction |
| MMAPAT2m         | MMh2[e] + MMh2[e] -> MMh2[e] + MMh2[e]                               | -1000 | 1000 | 268860.2 or 268860.1                                                                                       | Moose metabolic/transport demand<br>reaction |
| MMAPNNOXs        | MMh2[e] + MMh2[e] -> MMh2[e] + MMh2[e]                               | 0     | 1000 |                                                                                                            | Moose metabolic/transport demand<br>reaction |
| MMAPOCF          | MMh2[e] + MMh2[e] -> MMh2[e] + MMh2[e]                               | 0     | 1000 |                                                                                                            | Moose metabolic/transport demand<br>reaction |
| MMAPOCFm         | MMh2[e] + MMh2[e] -> MMh2[e] + MMh2[e]                               | 0     | 1000 |                                                                                                            | Moose metabolic/transport demand<br>reaction |
| MMAPOC_LYS_BTNP  | MMh2[e] + MMh2[e] -> MMh2[e] + MMh2[e]                               | 0     | 1000 |                                                                                                            | Moose metabolic/transport demand<br>reaction |
| MMAPOC_LYS_BTNPm | MMh2[e] + MMh2[e] -> MMh2[e] + MMh2[e]                               | 0     | 1000 |                                                                                                            | Moose metabolic/transport demand<br>reaction |
| MMAPPNSs         | MMh2[e] <=> MMh2[e]                                                  | 0     | 1000 |                                                                                                            | Moose metabolic/transport demand<br>reaction |
| MMAPRGSTRNe      | MMh2[e] <=> MMh2[e]                                                  | 0     | 1000 |                                                                                                            | Moose metabolic/transport demand<br>reaction |
| MMAPRTO2         | MMh2[e] + MMh2[e] + MMh2[e] -> MMh2[e] + MMh2[e] + MMh2[e]           | 0     | 1000 | 109731.1 or 17161.1                                                                                        | Moose metabolic/transport demand<br>reaction |
| MMAQCOBAL1       | MMh2[e] -> MMh2[e]                                                   | 0     | 1000 |                                                                                                            | Moose metabolic/transport demand<br>reaction |
| MMARABR          | MMh2[e] + MMh2[e] + MMh2[e] -> MMh2[e] + MMh2[e] + MMh2[e]           | 0     | 1000 | 110198.1 or 58810.2 or 11677.1 or 58810.1                                                                  | Moose metabolic/transport demand<br>reaction |
| MMARAB_L1        | MMh2[e] <=> MMh2[e]                                                  | -1000 | 1000 |                                                                                                            | Moose metabolic/transport demand<br>reaction |
| MMARACHCOax      | MMh2[e] <=> MMh2[e]                                                  | -1000 | 1000 |                                                                                                            | Moose metabolic/transport demand<br>reaction |
| MMARACHCPT1      | MMh2[e] + MMh2[e] -> MMh2[e] + MMh2[e]                               | 0     | 1000 | 12895.4 or 12894.1 or 78070.1 or 12895.2 or 12895.3 or 12895.1                                             | Moose metabolic/transport demand<br>reaction |
| MMARACHCPT2      | MMh2[e] + MMh2[e] -> MMh2[e] + MMh2[e]                               | 0     | 1000 | 12896.1                                                                                                    | Moose metabolic/transport demand<br>reaction |
| MMARACHCRN1      | MMh2[e] + MMh2[e] -> MMh2[e] + MMh2[e]                               | 0     | 1000 | 57279.1                                                                                                    | Moose metabolic/transport demand<br>reaction |
| MMARACHDCOax     | MMh2[e] <=> MMh2[e]                                                  | -1000 | 1000 |                                                                                                            | Moose metabolic/transport demand<br>reaction |
| MMARACHD2        | MMh2[e] <=> MMh2[e]                                                  | 0     | 1000 |                                                                                                            | Moose metabolic/transport demand<br>reaction |
| MMARACHDw        | MMh2[e] <=> MMh2[e]                                                  | -1000 | 1000 |                                                                                                            | Moose metabolic/transport demand<br>reaction |

|                  |                                                                                                       |       |      |                                           |                                              |
|------------------|-------------------------------------------------------------------------------------------------------|-------|------|-------------------------------------------|----------------------------------------------|
| MMARACHFABPme    | MMarsch[u] -> MMarsch[c]                                                                              | 0     | 1000 | (14719.1 or 12491.1)                      | Moose metabolic/transport demand<br>reaction |
| MMARACTr         | MMarsch[c] <=> MMarsch[c]                                                                             | 0     | 1000 |                                           | Moose metabolic/transport demand<br>reaction |
| MMARGALaBAtc     | MMab-L[c] + MMarg-L[u] -> MMab-L[u] + MMarg-L[c]                                                      | 0     | 1000 | (30962.1 and 20532.1)                     | Moose metabolic/transport demand<br>reaction |
| MMARGATB0c       | 2 MMbu[n] + MMc[u] + MMarg-L[u] -> 2 MMbu[n] + MMc[c] + MMarg-L[c]                                    | 0     | 1000 | 56774.1                                   | Moose metabolic/transport demand<br>reaction |
| MMARGDCn         | MMb[n] + MMarg-L[m] -> MMc2[m] + MMarg[m]                                                             | 0     | 1000 | 242669.1                                  | Moose metabolic/transport demand<br>reaction |
| MMARGELUBAtc     | MMbw-L[c] + MMarg-L[u] -> MMbw-L[u] + MMarg-L[c]                                                      | 0     | 1000 | (30962.1 and 20532.1)                     | Moose metabolic/transport demand<br>reaction |
| MMARGLYSex       | MMarg-L[c] + MMbys-L[c] -> MMarg-L[c] + MMbys-L[c]                                                    | 0     | 1000 | 330836.1 and 17254.1                      | Moose metabolic/transport demand<br>reaction |
| MMARGN           | MMb2[c] + MMarg-L[c] -> MMb2[c] + MMarg[c]                                                            | 0     | 1000 | 11846.1                                   | Moose metabolic/transport demand<br>reaction |
| MMARGNm          | MMb2[m] + MMarg-L[m] -> MMb2[m] + MMarg[m]                                                            | 0     | 1000 | 11847.1                                   | Moose metabolic/transport demand<br>reaction |
| MMARGSL          | MMargus[c] <=> MMfin[c] + MMarg-L[c]                                                                  | -1000 | 1000 | 109900.1                                  | Moose metabolic/transport demand<br>reaction |
| MMARGSS          | MMarg[c] + MMasp-L[c] + MMcfr-L[c] -> MMb[c] + MMarg[c] + MMarg[c] + MMargus[c]                       | 0     | 1000 | 11898.1 or 11898.2                        | Moose metabolic/transport demand<br>reaction |
| MMARGu4          | MMbu[c] + MMarg-L[c] -> MMbu[c] + MMarg-L[c]                                                          | 0     | 1000 | 56774.1                                   | Moose metabolic/transport demand<br>reaction |
| MMARGz5          | MMarg-L[c] <=> MMarg-L[c]                                                                             | -1000 | 1000 | 11987.1                                   | Moose metabolic/transport demand<br>reaction |
| MMARGz6m         | MMarg-L[c] -> MMarg-L[c]                                                                              | 0     | 1000 | 69354.1 or 11989.1 or 11988.1 or 11987.1  | Moose metabolic/transport demand<br>reaction |
| MMARGcm          | MMb[m] + MMarg-L[c] <=> MMb[c] + MMarg-L[m]                                                           | -1000 | 1000 | 18408.1 or 83885.1                        | Moose metabolic/transport demand<br>reaction |
| MMARSA           | MMb2[m] + MMgubde_hu[] -> MMb[] + MMgubde_hu[] + MMb[]                                                | 0     | 1000 | 11883.1                                   | Moose metabolic/transport demand<br>reaction |
| MMARTCOAL1       | MMcoal[c] + MMbtotal[c] <=> MMbtotal[c]                                                               | -1000 | 1000 |                                           | Moose metabolic/transport demand<br>reaction |
| MMARTCOAL2       | MMcoal[c] + MMbtotal[c] <=> MMbtotal[c]                                                               | -1000 | 1000 |                                           | Moose metabolic/transport demand<br>reaction |
| MMARTCOAL3       | MMcoal[c] + MMbtotal[c] <=> MMbtotal[c]                                                               | -1000 | 1000 |                                           | Moose metabolic/transport demand<br>reaction |
| MMARTFR11        | MMqntco[c] -> MMRLcon_hu[c]                                                                           | 0     | 1000 |                                           | Moose metabolic/transport demand<br>reaction |
| MMARTFR12        | MMfud2[m] + MMbco[c] -> MMfud[m] + MMRLcon_hu[c]                                                      | 0     | 1000 |                                           | Moose metabolic/transport demand<br>reaction |
| MMARTFR13        | MMbco[c] -> 0.875 MMRLcon_hu[c]                                                                       | 0     | 1000 |                                           | Moose metabolic/transport demand<br>reaction |
| MMARTFR202       | MMb[m] + MMbndp[m] + 2 MMfud2[m] + MMbndccco[c] -> MMbndp[m] + 2 MMfud[m] + 1.125 MMRLcon_hu[c]       | 0     | 1000 |                                           | Moose metabolic/transport demand<br>reaction |
| MMARTFR203       | MMb[m] + MMbndp[m] + 2 MMfud2[m] + MMbndccco[c] -> MMbndp[m] + 2 MMfud[m] + 1.125 MMRLcon_hu[c]       | 0     | 1000 |                                           | Moose metabolic/transport demand<br>reaction |
| MMARTFR204       | 2 MMb[m] + 2 MMbndp[m] + 2 MMfud2[m] + MMbndccco[c] -> 2 MMbndp[m] + 2 MMfud[m] + 1.125 MMRLcon_hu[c] | 0     | 1000 |                                           | Moose metabolic/transport demand<br>reaction |
| MMARTFR205       | MMb[m] + MMbndp[m] -> 2 MMfud2[m] + MMbndccco[c] -> MMbndp[m] + 2 MMfud[m] + 1.25 MMRLcon_hu[c]       | 0     | 1000 |                                           | Moose metabolic/transport demand<br>reaction |
| MMARTFR206       | 2 MMb[m] + 2 MMbndp[m] + 2 MMfud2[m] -> MMbndccco[c] -> 2 MMbndp[m] + 2 MMfud[m] + 1.25 MMRLcon_hu[c] | 0     | 1000 |                                           | Moose metabolic/transport demand<br>reaction |
| MMARTFR207       | MMarschco[c] -> 1.25 MMRLcon_hu[c]                                                                    | 0     | 1000 |                                           | Moose metabolic/transport demand<br>reaction |
| MMARTFR208       | 2 MMb[m] + 2 MMbndp[m] + 3 MMfud2[m] + MMbndccco[c] -> 2 MMbndp[m] + 3 MMfud[m] + 1.25 MMRLcon_hu[c]  | 0     | 1000 |                                           | Moose metabolic/transport demand<br>reaction |
| MMARTFR209       | 2 MMb[m] + 2 MMbndp[m] + 2 MMfud2[m] + MMbndccco[c] -> 2 MMbndp[m] + 2 MMfud[m] + 1.375 MMRLcon_hu[c] | 0     | 1000 |                                           | Moose metabolic/transport demand<br>reaction |
| MMARTFR210       | MMb[m] + MMbndp[m] + MMfud2[m] + MMbndccco[c] -> MMbndp[m] + MMfud[m] + 1.125 MMRLcon_hu[c]           | 0     | 1000 |                                           | Moose metabolic/transport demand<br>reaction |
| MMARTFR211       | 2 MMb[m] + 2 MMbndp[m] + 3 MMfud2[m] + MMbndccco[c] -> 2 MMbndp[m] + 3 MMfud[m] + 1.375 MMRLcon_hu[c] | 0     | 1000 |                                           | Moose metabolic/transport demand<br>reaction |
| MMARTFR212       | 2 MMb[m] + 2 MMbndp[m] + 3 MMfud2[m] + MMbndccco[c] -> 2 MMbndp[m] + 3 MMfud[m] + 1.375 MMRLcon_hu[c] | 0     | 1000 |                                           | Moose metabolic/transport demand<br>reaction |
| MMARTFR213       | 3 MMb[m] + 3 MMbndp[m] + 3 MMfud2[m] + MMc22ccco[c] -> 3 MMbndp[m] + 3 MMfud[m] + 1.375 MMRLcon_hu[c] | 0     | 1000 |                                           | Moose metabolic/transport demand<br>reaction |
| MMARTFR31        | MMbco[c] -> 1.125 MMRLcon_hu[c]                                                                       | 0     | 1000 |                                           | Moose metabolic/transport demand<br>reaction |
| MMARTFR32        | MMfud2[m] + MMbndccco[c] -> MMfud[m] + 1.125 MMRLcon_hu[c]                                            | 0     | 1000 |                                           | Moose metabolic/transport demand<br>reaction |
| MMARTFR33        | MMfud2[m] + MMbndccco[c] -> MMfud[m] + 1.125 MMRLcon_hu[c]                                            | 0     | 1000 |                                           | Moose metabolic/transport demand<br>reaction |
| MMARTFR34        | 2 MMfud2[m] + MMbndccco[c] -> 2 MMfud[m] + 1.125 MMRLcon_hu[c]                                        | 0     | 1000 |                                           | Moose metabolic/transport demand<br>reaction |
| MMARTFR41        | MMfud2[m] + MMbndccco[c] -> MMfud[m] + MMRLcon_hu[c]                                                  | 0     | 1000 |                                           | Moose metabolic/transport demand<br>reaction |
| MMARTFR42        | MMfud2[m] + MMbndccco[c] -> MMfud[m] + 1.125 MMRLcon_hu[c]                                            | 0     | 1000 |                                           | Moose metabolic/transport demand<br>reaction |
| MMARTFR43        | MMfud2[m] + MMbndccco[c] -> MMfud[m] + 1.125 MMRLcon_hu[c]                                            | 0     | 1000 |                                           | Moose metabolic/transport demand<br>reaction |
| MMARTFR44        | 2 MMfud2[m] + MMbndccco[c] -> 2 MMfud[m] + 1.125 MMRLcon_hu[c]                                        | 0     | 1000 |                                           | Moose metabolic/transport demand<br>reaction |
| MMARTFR45        | MMfud2[m] + MMbndccco[c] -> MMfud[m] + 1.5 MMRLcon_hu[c]                                              | 0     | 1000 |                                           | Moose metabolic/transport demand<br>reaction |
| MMARTFR46        | MMfud2[m] + MMbndccco[c] -> MMfud[m] + 1.125 MMRLcon_hu[c]                                            | 0     | 1000 |                                           | Moose metabolic/transport demand<br>reaction |
| MMARTFR51        | MMbndccco[c] -> 1.5 MMRLcon_hu[c]                                                                     | 0     | 1000 |                                           | Moose metabolic/transport demand<br>reaction |
| MMARTFR52        | MMbndccco[c] -> 1.625 MMRLcon_hu[c]                                                                   | 0     | 1000 |                                           | Moose metabolic/transport demand<br>reaction |
| MMARTFR53        | 2 MMb[m] + 2 MMbndp[m] + 2 MMfud2[m] + MMc22ccco[c] -> 2 MMbndp[m] + 2 MMfud[m] + 1.25 MMRLcon_hu[c]  | 0     | 1000 |                                           | Moose metabolic/transport demand<br>reaction |
| MMARTFR54        | 2 MMb[m] + 2 MMbndp[m] + 3 MMfud2[m] + MMbndccco[c] -> 2 MMbndp[m] + 3 MMfud[m] + 1.5 MMRLcon_hu[c]   | 0     | 1000 |                                           | Moose metabolic/transport demand<br>reaction |
| MMARTFR55        | 2 MMb[m] + 2 MMbndp[m] + 3 MMfud2[m] + MMbndccco[c] -> 2 MMbndp[m] + 3 MMfud[m] + 1.5 MMRLcon_hu[c]   | 0     | 1000 |                                           | Moose metabolic/transport demand<br>reaction |
| MMARTFR56        | 2 MMb[m] + 2 MMbndp[m] + 2 MMfud2[m] + MMbndccco[c] -> 2 MMbndp[m] + 2 MMfud[m] + 1.5 MMRLcon_hu[c]   | 0     | 1000 |                                           | Moose metabolic/transport demand<br>reaction |
| MMARTFR57        | 3 MMb[m] + 3 MMbndp[m] + 3 MMfud2[m] + MMbndccco[c] -> 3 MMbndp[m] + 3 MMfud[m] + 1.5 MMRLcon_hu[c]   | 0     | 1000 |                                           | Moose metabolic/transport demand<br>reaction |
| MMARTFR61        | MMfud2[m] + MMbndccco[c] -> MMfud[m] + MMRLcon_hu[c]                                                  | 0     | 1000 |                                           | Moose metabolic/transport demand<br>reaction |
| MMARTPLM1        | MMbndccco[c] <=> MMqntco[c]                                                                           | -1000 | 1000 |                                           | Moose metabolic/transport demand<br>reaction |
| MMARTPLM1m       | MMbndccco[m] <=> MMqntco[m]                                                                           | -1000 | 1000 |                                           | Moose metabolic/transport demand<br>reaction |
| MMARTPLM2        | MMbndccco[c] <=> MMqntco[c]                                                                           | -1000 | 1000 |                                           | Moose metabolic/transport demand<br>reaction |
| MMARTPLM2m       | MMbndccco[m] <=> MMqntco[m]                                                                           | -1000 | 1000 |                                           | Moose metabolic/transport demand<br>reaction |
| MMARTPLM3        | MMbndccco[c] <=> MMqntco[c]                                                                           | -1000 | 1000 |                                           | Moose metabolic/transport demand<br>reaction |
| MMARTPLM3m       | MMbndccco[m] <=> MMqntco[m]                                                                           | -1000 | 1000 |                                           | Moose metabolic/transport demand<br>reaction |
| MMASAIH          | MMb2[m] + MMcm_hu[] -> MMb2[m] + MMphing[]                                                            | 0     | 1000 | 11886.1 or 11886.2                        | Moose metabolic/transport demand<br>reaction |
| MMASCB0X         | 2 MMb[c] + MMasb-L[c] + 2 MMb2[c] -> 2 MMb2[c] + MMb2[c]                                              | 0     | 1000 |                                           | Moose metabolic/transport demand<br>reaction |
| MMASCBVCTc       | MMb2[c] + MMarg[c] + 2 MMbu[u] + MMasb-L[u] -> MMb2[c] + MMb[c] + MMarg[c] + 2 MMbu[u] + MMasb-L[c]   | 0     | 1000 | 20522.1 or 54338.1                        | Moose metabolic/transport demand<br>reaction |
| MMASCBr          | MMasb-L[c] <=> MMasb-L[c]                                                                             | 0     | 1000 |                                           | Moose metabolic/transport demand<br>reaction |
| MMASCBu4         | MMbu[c] + MMasb-L[c] <=> MMbu[c] + MMasb-L[c]                                                         | 0     | 1000 | 54338.2 or 20522.1 or 20522.2 or 54338.1  | Moose metabolic/transport demand<br>reaction |
| MMASALANaEx      | MMbu[c] + MMab-L[c] -> MMbu[c] + MMas-L[c] + MMab-L[c]                                                | 0     | 1000 | 20514.1                                   | Moose metabolic/transport demand<br>reaction |
| MMASNATB0c       | 2 MMbu[u] + MMc[u] + MMas-L[u] -> 2 MMbu[u] + MMc[c] + MMas-L[c]                                      | 0     | 1000 | 56774.1                                   | Moose metabolic/transport demand<br>reaction |
| MMASNB0AT3c      | MMbu[m] + MMas-L[u] -> MMbu[m] + MMas-L[c]                                                            | 0     | 1000 | (7008.1 or 74338.1 and 57394.1)           | Moose metabolic/transport demand<br>reaction |
| MMASNCYSNaEx     | MMbu[c] + MMas-L[c] -> MMbu[c] + MMas-L[c]                                                            | 0     | 1000 | 20514.1                                   | Moose metabolic/transport demand<br>reaction |
| MMASNLNaEx       | MMbu[c] + MMas-L[c] -> MMbu[c] + MMas-L[c]                                                            | 0     | 1000 | 20514.1                                   | Moose metabolic/transport demand<br>reaction |
| MMASNLELAT2c     | MMas-L[c] + MMb-L[c] -> MMas-L[c] + MMb-L[c]                                                          | 0     | 1000 | (20539.1 and 17254.1)                     | Moose metabolic/transport demand<br>reaction |
| MMASNNm          | MMb2[m] + MMas-L[m] -> MMarg-L[m] + MMb2[m]                                                           | 0     | 1000 | 66514.1                                   | Moose metabolic/transport demand<br>reaction |
| MMASNPHELAT2c    | MMas-L[c] + MMb-L[c] -> MMas-L[c] + MMb-L[c]                                                          | 0     | 1000 | (20539.1 and 17254.1)                     | Moose metabolic/transport demand<br>reaction |
| MMASNS1          | MMb2[c] + MMarg[c] + MMarg-L[c] + MMb-L[c] -> MMb[c] + MMb-L[c] + MMarg[c] + MMarg-L[c]               | 0     | 1000 | 27053.1 or 27053.2 or 27053.3             | Moose metabolic/transport demand<br>reaction |
| MMASNSERNaEx     | MMbu[c] + MMas-L[c] -> MMbu[c] + MMas-L[c]                                                            | 0     | 1000 | 20514.1                                   | Moose metabolic/transport demand<br>reaction |
| MMASNTBNaEx      | MMbu[c] + MMas-L[c] -> MMbu[c] + MMas-L[c]                                                            | 0     | 1000 | 20514.1                                   | Moose metabolic/transport demand<br>reaction |
| MMASN_X_STR_TB0r | MMas_X_Str_The[] <=> MMas_X_Str_The[]                                                                 | -1000 | 1000 |                                           | Moose metabolic/transport demand<br>reaction |
| MMASNS4          | MMbu[c] + MMas-L[c] -> MMbu[c] + MMas-L[c]                                                            | 0     | 1000 | 105727.1 or 67760.1 or 69354.1 or 56774.1 | Moose metabolic/transport demand<br>reaction |

[illegible]

|               |                                                                                                                |       |      |                                                                            |                                           |
|---------------|----------------------------------------------------------------------------------------------------------------|-------|------|----------------------------------------------------------------------------|-------------------------------------------|
| MMB3GNT11g    | MMacgnt[g] + MMgal[4acgpgshide,hs[g] -> MMh[g] + MMadp[g] + MMacgkall[4acgpgshide,hs[g]                        | 0     | 1000 |                                                                            | Mouse metabolic/transport demand reaction |
| MMB3GNT12g    | MMacgnt[g] + MMgshcpgkall[4acgpgshide,hs[g] -> MMh[g] + MMadp[g] + MMacgk13gshcpgkall[4acgpgshide,hs[g]        | 0     | 1000 | 53625.1                                                                    | Mouse metabolic/transport demand reaction |
| MMB3GNT10h    | MMadp[g] + MMacgkpgshide,hs[g] -> MMh[g] + MMadp[g] + MMgal[4acgpgshide,hs[g]                                  | 0     | 1000 | 53625.1 or 53625.1                                                         | Mouse metabolic/transport demand reaction |
| MMB3GNT11g    | MMadp[g] + MMacgk12gall[4acgpgshide,hs[g] -> MMh[g] + MMadp[g] + MMgshcpgk12gall[4acgpgshide,hs[g]             | 0     | 1000 | 72297.1                                                                    | Mouse metabolic/transport demand reaction |
| MMB3GNT12g    | MMadp[g] + MMacgkpgkall[4acgpgshide,hs[g] -> MMh[g] + MMadp[g] + MMgshcpgkall[4acgpgshide,hs[g]                | 0     | 1000 | 72297.1                                                                    | Mouse metabolic/transport demand reaction |
| MMB3GNT13g    | MMadp[g] + MMacgkpgshcpgkall[4acgpgshide,hs[g] -> MMh[g] + MMadp[g] + MMgshcpgkpgshcpgkall[4acgpgshide,hs[g]   | 0     | 1000 | 72297.1                                                                    | Mouse metabolic/transport demand reaction |
| MMB3GNT14g    | MMadp[g] + MMacgkpgshcpgkall[4acgpgshide,hs[g] -> MMh[g] + MMadp[g] + MMgshcpgkpgshcpgkall[4acgpgshide,hs[g]   | 0     | 1000 | 72297.1                                                                    | Mouse metabolic/transport demand reaction |
| MMB3GNT15g    | MMadp[g] + MMacgk13gshcpgkall[4acgpgshide,hs[g] -> MMh[g] + MMadp[g] + MMgshcpgk13gshcpgkall[4acgpgshide,hs[g] | 0     | 1000 | 72297.1                                                                    | Mouse metabolic/transport demand reaction |
| MMB3GNT13g    | MMadp[g] + MMhchem,hs[g] -> MMh[g] + MMadp[g] + MMgshchem,hs[g]                                                | 0     | 1000 | 72297.1                                                                    | Mouse metabolic/transport demand reaction |
| MMB3GNT32g    | MMadp[g] + MMgshchem,hs[g] -> MMh[g] + MMadp[g] + MMgshchem,hs[g]                                              | 0     | 1000 | 72297.1                                                                    | Mouse metabolic/transport demand reaction |
| MMB3GNT33g    | MMadp[g] + MMgshchem,hs[g] -> MMh[g] + MMadp[g] + MMgshchem,hs[g]                                              | 0     | 1000 | 72297.1                                                                    | Mouse metabolic/transport demand reaction |
| MMB3GNT34g    | MMacgnt[g] + MMgshcpgkall[4acgpgshide,hs[g] -> MMh[g] + MMadp[g] + MMacgkpgshide,hs[g]                         | 0     | 1000 | 72297.1                                                                    | Mouse metabolic/transport demand reaction |
| MMB3GNT35g    | MMadp[g] + MMacgkpgshide,hs[g] -> MMh[g] + MMadp[g] + MMgshcpgkpgshide,hs[g]                                   | 0     | 1000 | 72297.1                                                                    | Mouse metabolic/transport demand reaction |
| MMB3GNT36g    | MMacgnt[g] + MMgshcpgkall[4acgpgshide,hs[g] -> MMh[g] + MMadp[g] + MMgshcpgkpgkall[4acgpgshide,hs[g]           | 0     | 1000 | 72297.1                                                                    | Mouse metabolic/transport demand reaction |
| MMB3GNT37g    | MMadp[g] + MMgnta,hs[g] -> MMh[g] + MMadp[g] + MMgnta,hs[g]                                                    | 0     | 1000 | 72297.1                                                                    | Mouse metabolic/transport demand reaction |
| MMB3GNT39g    | MMadp[g] + MMgshcpgkall[4acgpgshide,hs[g] -> MMh[g] + MMadp[g] + MMgshcpgkpgkall[4acgpgshide,hs[g]             | 0     | 1000 | 72297.1                                                                    | Mouse metabolic/transport demand reaction |
| MMB3GNT51g    | MMgshcpgkall[4acgpgshide,hs[g] + MMacgnt[g] -> MMh[g] + MMadp[g] + MMgshcpgkpgkall[4acgpgshide,hs[g]           | 0     | 1000 | 72297.1                                                                    | Mouse metabolic/transport demand reaction |
| MMBAAT1x      | MMh[g] + MMchokou[s] -> MMcou[s] + MMgshchok[s]                                                                | 0     | 1000 | 108105.1                                                                   | Mouse metabolic/transport demand reaction |
| MMBAAT2x      | MMchokou[s] + MMnu[s] -> MMcou[s] + MMchokou[s]                                                                | 0     | 1000 | 12012.1                                                                    | Mouse metabolic/transport demand reaction |
| MMBAAT3x      | MMh[g] + MMdgshchokou[s] -> MMcou[s] + MMdgshchok[s]                                                           | 0     | 1000 | 12012.1                                                                    | Mouse metabolic/transport demand reaction |
| MMBAAT4x      | MMh[g] + MMchokou[s] -> MMcou[s] + MMgshchok[s]                                                                | 0     | 1000 | 12012.1                                                                    | Mouse metabolic/transport demand reaction |
| MMBAAT5x      | MMnu[s] + MMchokou[s] -> MMcou[s] + MMchokou[s]                                                                | 0     | 1000 | 12012.1                                                                    | Mouse metabolic/transport demand reaction |
| MMBACCL       | MMap[c] + MMh[c] + MMhu[c] -> MMpp[c] + MMhuamp[c]                                                             | 0     | 1000 | 12012.1                                                                    | Mouse metabolic/transport demand reaction |
| MMBACCLm      | MMh[n] + MMmp[n] + MMhu[n] -> MMpp[n] + MMhuamp[n]                                                             | 0     | 1000 | 110948.1                                                                   | Mouse metabolic/transport demand reaction |
| MMBALABETa    | 2 MMhu[1] + MMc[4] + MMab-B[a] -> 2 MMhu[1] + MMc[4] + MMab-B[c]                                               | 0     | 1000 | 110948.1                                                                   | Mouse metabolic/transport demand reaction |
| MMBALAPATb    | MMh[u] + MMab-B[u] -> MMh[c] + MMab-B[c]                                                                       | 0     | 1000 | 56774.1                                                                    | Mouse metabolic/transport demand reaction |
| MMBALAVES3EC  | MMh2[c] + MMap[c] + 3 MMab-B[c] -> MMap[c] + MMh[c] + MMhu[c] + 3 MMab-B[c]                                    | 0     | 1000 | 215335.1                                                                   | Mouse metabolic/transport demand reaction |
| MMBALAmm      | MMab-B[c] <=> MMab-B[m]                                                                                        | -1000 | 1000 | 22348.1                                                                    | Mouse metabolic/transport demand reaction |
| MMBAMPALDOX   | MMh2[c] + MMhuamp[c] <=> MMhu[c] -> 2 MMh[c] + MMhu[c] + MMab-B[c]                                             | 0     | 1000 |                                                                            | Mouse metabolic/transport demand reaction |
| MMBAMPALDOXm  | MMh2[m] + MMhu[m] -> MMhuamp[m] -> 2 MMh[m] + MMhu[m] + MMab-B[m]                                              | 0     | 1000 | 19378.1 or 56752.1 or 110951.1 or 11668.1 or 11671.1 or 19378.2 or 19378.3 | Mouse metabolic/transport demand reaction |
| MMBBHOX       | MMh2[c] + MMh[c] + MMhuamp[c] -> MMcou[c] + MMh[c] + MMhu[c] + MMhu[c]                                         | 0     | 1000 | 11669.1 or 212647.1 or 212647.2 or 72535.1                                 | Mouse metabolic/transport demand reaction |
| MMBCDO        | MMh2[c] + MMcaro[c] -> 2 MMhu[c]                                                                               | 0     | 1000 | 170442.1                                                                   | Mouse metabolic/transport demand reaction |
| MMBDhm        | MMhu[m] + MMhhu[m] <=> MMh[m] + MMhu[m] + MMhu[m]                                                              | -1000 | 1000 | 63857.1                                                                    | Mouse metabolic/transport demand reaction |
| MMBDMT_L      | 0.1 MMh2cpgk1,1[c] + MMgshchem[c] -> MMh[c] + MMh[c]                                                           | 0     | 1000 | 71911.1 or 71911.2 or 71911.3                                              | Mouse metabolic/transport demand reaction |
| MMBDMT_U      | MMh2cpgk1,1[c] + 0.1 MMgshchem[c] -> MMh[c] + MMh[c]                                                           | 0     | 1000 | 208211.1                                                                   | Mouse metabolic/transport demand reaction |
| MMBETALDRh    | MMh2[c] + MMhu[c] + MMhuamp[c] -> 2 MMh[c] + MMhu[c] + MMhu[c]                                                 | 0     | 1000 | 208211.1                                                                   | Mouse metabolic/transport demand reaction |
| MMBETALDRm    | MMh2[m] + MMhu[m] + MMhuamp[m] -> 2 MMh[m] + MMhu[m] + MMhu[m]                                                 | 0     | 1000 | 56752.1                                                                    | Mouse metabolic/transport demand reaction |
| MMBGLC1       | MMh[c] + MMh[c] <=> MMh[c] + MMh[c]                                                                            | -1000 | 1000 |                                                                            | Mouse metabolic/transport demand reaction |
| MMBGLUGCh     | MMh[c] + MMgshchokou[s] -> MMh[c] + MMgshchokou[s]                                                             | 0     | 1000 |                                                                            | Mouse metabolic/transport demand reaction |
| MMBGLUGCh     | MMh[c] + MMgshchokou[s] <=> MMh[c] + MMgshchokou[s]                                                            | -1000 | 1000 |                                                                            | Mouse metabolic/transport demand reaction |
| MMBGLUTCHLz   | MMh[c] + MMgshchokou[s] -> MMh[c] + MMgshchokou[s]                                                             | 0     | 1000 |                                                                            | Mouse metabolic/transport demand reaction |
| MMBGLUTCHL1   | MMh[c] + MMgshchokou[s] <=> MMh[c] + MMgshchokou[s]                                                            | -1000 | 1000 |                                                                            | Mouse metabolic/transport demand reaction |
| MMBGLUTDECH3x | MMh[c] + MMgshchokou[s] -> MMh[c] + MMgshchokou[s]                                                             | 0     | 1000 |                                                                            | Mouse metabolic/transport demand reaction |
| MMBGLUTDECH3m | MMh[c] + MMgshchokou[s] <=> MMh[c] + MMgshchokou[s]                                                            | -1000 | 1000 |                                                                            | Mouse metabolic/transport demand reaction |
| MMBHR         | MMh[c] + MMhhu[c] <=> MMh[c] + MMhhu[c]                                                                        | 0     | 1000 |                                                                            | Mouse metabolic/transport demand reaction |
| MMBHbm        | MMh[c] + MMhhu[c] <=> MMh[m] + MMhhu[m]                                                                        | -1000 | 1000 |                                                                            | Mouse metabolic/transport demand reaction |
| MMBHMT        | MMhcy-L[c] + MMhhu[c] -> MMhhu[c] + MMhcy-L[c]                                                                 | 0     | 1000 |                                                                            | Mouse metabolic/transport demand reaction |
| MMBILDGLCURe  | MMh2[c] + MMap[c] + MMhhu[c] <=> MMap[c] + MMh[c] + MMhhu[c]                                                   | 0     | 0    | 12116.1 or 64918.1                                                         | Mouse metabolic/transport demand reaction |
| MMBILDGLCURm  | MMhhu[c] <=> MMhhu[c]                                                                                          | -1000 | 1000 | 17250.1                                                                    | Mouse metabolic/transport demand reaction |
| MMBILGLCURe   | MMh2[c] + MMap[c] + MMhhu[c] <=> MMap[c] + MMh[c] + MMhhu[c]                                                   | 0     | 0    |                                                                            | Mouse metabolic/transport demand reaction |
| MMBILGLCURm   | MMhhu[c] <=> MMhhu[c]                                                                                          | -1000 | 1000 | 17250.1                                                                    | Mouse metabolic/transport demand reaction |
| MMBILRED      | MMh[c] + MMhuamp[c] + MMhhu[c] -> MMhuamp[c] + MMhhu[c]                                                        | 0     | 1000 |                                                                            | Mouse metabolic/transport demand reaction |
| MMBILRLB2     | MMhhu[c] + MMhhu[c] <=> MMhhu[c] + MMhhu[c]                                                                    | -1000 | 1000 | 233016.1 or 109778.1                                                       | Mouse metabolic/transport demand reaction |
| MMBILRLBm     | MMhhu[c] <=> MMhhu[c]                                                                                          | -1000 | 1000 | 18669.1                                                                    | Mouse metabolic/transport demand reaction |
| MMBIOCYTn     | MMhhu[c] <=> MMhhu[c]                                                                                          | -1000 | 1000 |                                                                            | Mouse metabolic/transport demand reaction |
| MMBMTre_L     | 0.1 MMhhuamp,1[h] + MMhhuamp,1[h] -> 0.1 MMhhu,1[h] + MMhhuamp,1[h]                                            | 0     | 1000 |                                                                            | Mouse metabolic/transport demand reaction |
| MMBMTre_U     | MMhhuamp,1[h] + 0.1 MMhhuamp,1[h] -> MMhhu[c] + MMhhuamp,1[h]                                                  | 0     | 1000 | 55981.1                                                                    | Mouse metabolic/transport demand reaction |
| MMBPNT        | MMh2[c] + MMap[c] -> MMp[c] + MMap[c]                                                                          | 0     | 1000 | 55981.1                                                                    | Mouse metabolic/transport demand reaction |
| MMBPNT2       | MMh2[c] + MMap[c] -> MMp[c] + MMap[c]                                                                          | 0     | 1000 | 23827.1                                                                    | Mouse metabolic/transport demand reaction |
| MMBTND1       | MMh2[c] + MMhhu[c] -> MMhhu-L[c] + MMhhu[c]                                                                    | 0     | 1000 | 23827.1                                                                    | Mouse metabolic/transport demand reaction |
| MMBTND1a      | MMhhu[c] + MMh2[c] -> MMhhu[m] + MMhhu-L[m]                                                                    | 0     | 1000 | 26363.1                                                                    | Mouse metabolic/transport demand reaction |
| MMBTND2       | MMh2[c] + MMhhu[c] -> MMhhu-L[c] + MMhhu[c]                                                                    | 0     | 1000 | 26363.1                                                                    | Mouse metabolic/transport demand reaction |
| MMBTNDm       | MMh2[m] + MMhhu[m] -> MMhhu-L[m] + MMhhu[m]                                                                    | 0     | 1000 | 26363.1                                                                    | Mouse metabolic/transport demand reaction |
| MMBTNPL       | MMhhu-C-Lys[c] + MMhhuamp[c] -> MMhhu[c] + MMhhuamp[c]                                                         | 0     | 1000 | 26363.1                                                                    | Mouse metabolic/transport demand reaction |
| MMBTNPLm      | MMhhu-C-Lys[m] + MMhhuamp[m] -> MMhhu[m] + MMhhuamp[m]                                                         | 0     | 1000 | 110948.1                                                                   | Mouse metabolic/transport demand reaction |
| MMBTNTe       | MMhhu[c] -> MMhhu[c]                                                                                           | 0     | 1000 | 110948.1                                                                   | Mouse metabolic/transport demand reaction |
| MMBTNT2       | MMhhu[c] + MMhhu[c] <=> MMhhu[c] + MMhhu[c]                                                                    | 0     | 1000 |                                                                            | Mouse metabolic/transport demand reaction |
| MMBTNTm       | MMhhu[c] + MMhhu[c] <=> MMhhu[m] + MMhhu[m]                                                                    | -1000 | 1000 | 20501.1                                                                    | Mouse metabolic/transport demand reaction |
| MMBTNT3       | MMh2[c] + MMap[c] + 2 MMhu[c] + MMhhu[c] -> MMhhu[c] + MMhhu[c] + 2 MMhu[c] + MMhu[c]                          | 0     | 1000 | 20501.1                                                                    | Mouse metabolic/transport demand reaction |
| MMBTNT4       | MMhhu[c] + MMhhu[c] -> MMhhu[c] + MMhhu[c]                                                                     | 0     | 1000 | 330064.1                                                                   | Mouse metabolic/transport demand reaction |
| MMBTNTm       | MMhhu[c] <=> MMhhu[m]                                                                                          | -1000 | 1000 | 80721.1                                                                    | Mouse metabolic/transport demand reaction |
| MMBUT2        | MMh2[c] + 2 MMhhu[c] + MMhhu[c] -> MMhhu[c] + MMhhu[c] + MMhhu-L[c]                                            | 0     | 1000 |                                                                            | Mouse metabolic/transport demand reaction |
| MMBUT2m       | MMhhu[c] + MMhhu[c] <=> MMhhu[m] + MMhhu[m]                                                                    | -1000 | 1000 | 103149.1                                                                   | Mouse metabolic/transport demand reaction |
| MMBUT2s       | MMhhu[c] + MMhhu[c] <=> MMhhu[c] + MMhhu[c]                                                                    | 0     | 1000 | 20501.1                                                                    | Mouse metabolic/transport demand reaction |
| MMHVIT1       | MMhhu[c] -> MMhhu[c]                                                                                           | 0     | 1000 | 20501.1                                                                    | Mouse metabolic/transport demand reaction |
| MMBZ          | MMhhu[c] <=> MMhhu[c]                                                                                          | 0     | 1000 |                                                                            | Mouse metabolic/transport demand reaction |
| MMBZr         | MMhhu[c] <=> MMhhu[r]                                                                                          | -1000 | 1000 |                                                                            | Mouse metabolic/transport demand reaction |
| MMB_MANNASEb  | MMh2[m] + MMhu[m] -> MMhuamp[m] + MMhu[m]                                                                      | 0     | 1000 |                                                                            | Mouse metabolic/transport demand reaction |
| MMB10CPT2m    | MMhu[m] + MMhuamp[m] -> MMhu[m] + MMhuamp[m]                                                                   | 0     | 1000 | 110773.1                                                                   | Mouse metabolic/transport demand reaction |

|                |                                                                                                            |       |      |                                                                                             |                                              |
|----------------|------------------------------------------------------------------------------------------------------------|-------|------|---------------------------------------------------------------------------------------------|----------------------------------------------|
| MMC14STR       | $MMHq + MM44inc[r] + MMdup[r] \rightarrow MM44myn[r] + MMdup[r]$                                           | 0     | 1000 |                                                                                             | Mouse metabolic/transport demand<br>reaction |
| MMC16OCP11c    | $MMcsc[c] + MMpmcsc[c] \leftrightarrow MMcsc[c] + MMpmcsc[c]$                                              | -1000 | 1000 | 73166.1                                                                                     | Mouse metabolic/transport demand<br>reaction |
| MMC16OCP2      | $MMcsc[m] + MMpmcsc[m] \rightarrow MMcsc[m] + MMpmcsc[m]$                                                  | 0     | 1000 | 12895.4 or 12894.1 or 78070.1 or 12895.2 or 12895.3 or 12895.1                              | Mouse metabolic/transport demand<br>reaction |
| MMC16OCR2      | $MMpmcsc[c] \rightarrow MMpmcsc[m]$                                                                        | 0     | 1000 | 12896.1                                                                                     | Mouse metabolic/transport demand<br>reaction |
| MMC16ICPT12    | $MMcsc[c] + MMhd2zsc[c] \rightarrow MMcsc[c] + MMhd2zsc[c]$                                                | 0     | 1000 | 57279.1                                                                                     | Mouse metabolic/transport demand<br>reaction |
| MMC16ICPT11c   | $MMcsc[c] + MMhd2zsc[c] \leftrightarrow MMcsc[c] + MMhd2zsc[c]$                                            | -1000 | 1000 | 12895.4 or 12894.1 or 78070.1 or 12895.2 or 12895.3 or 12895.1                              | Mouse metabolic/transport demand<br>reaction |
| MMC16ICPT22    | $MMcsc[m] + MMhd2zsc[m] \rightarrow MMcsc[m] + MMhd2zsc[m]$                                                | 0     | 1000 | 12895.4 or 12894.1 or 78070.1 or 12895.2 or 12895.3 or 12895.1                              | Mouse metabolic/transport demand<br>reaction |
| MMC16ICPT2m    | $MMcsc[m] + MMhd2zsc[m] \leftrightarrow MMcsc[m] + MMhd2zsc[m]$                                            | -1000 | 1000 | 12896.1                                                                                     | Mouse metabolic/transport demand<br>reaction |
| MMC16ICRN2i    | $MMhd2zsc[c] \rightarrow MMhd2zsc[m]$                                                                      | 0     | 1000 | 12896.1                                                                                     | Mouse metabolic/transport demand<br>reaction |
| MMC16ICRN      | $MMhd2zsc[c] \rightarrow MMhd2zsc[m]$                                                                      | 0     | 1000 | 57279.1                                                                                     | Mouse metabolic/transport demand<br>reaction |
| MMC18OCP1      | $MMcsc[c] + MMhsc[c] \rightarrow MMcsc[c] + MMhsc[c]$                                                      | 0     | 1000 | 57279.1                                                                                     | Mouse metabolic/transport demand<br>reaction |
| MMC18OCP2      | $MMcsc[m] + MMhsc[m] \rightarrow MMcsc[m] + MMhsc[m]$                                                      | 0     | 1000 | 12895.4 or 12894.1 or 78070.1 or 12895.2 or 12895.3 or 12895.1                              | Mouse metabolic/transport demand<br>reaction |
| MMC18OCR2      | $MMhsc[c] \rightarrow MMhsc[m]$                                                                            | 0     | 1000 | 12896.1                                                                                     | Mouse metabolic/transport demand<br>reaction |
| MMC18ICPT1c    | $MMcsc[c] + MMhd2zsc[c] \leftrightarrow MMcsc[c] + MMhd2zsc[c]$                                            | -1000 | 1000 | 57279.1                                                                                     | Mouse metabolic/transport demand<br>reaction |
| MMC18ICPT2m    | $MMcsc[m] + MMhd2zsc[m] \leftrightarrow MMcsc[m] + MMhd2zsc[m]$                                            | -1000 | 1000 | 12895.4 or 12894.1 or 78070.1 or 12895.2 or 12895.3 or 12895.1                              | Mouse metabolic/transport demand<br>reaction |
| MMC18ICRN      | $MMhd2zsc[c] \rightarrow MMhd2zsc[m]$                                                                      | 0     | 1000 | 12896.1                                                                                     | Mouse metabolic/transport demand<br>reaction |
| MMC20OCP1      | $MMcsc[c] + MMarchdsc[c] \rightarrow MMcsc[c] + MMarchdsc[c]$                                              | 0     | 1000 | 57279.1                                                                                     | Mouse metabolic/transport demand<br>reaction |
| MMC20OCP2      | $MMcsc[m] + MMarchdsc[m] \rightarrow MMcsc[m] + MMarchdsc[m]$                                              | 0     | 1000 | 12895.4 or 12894.1 or 78070.1 or 12895.2 or 12895.3 or 12895.1                              | Mouse metabolic/transport demand<br>reaction |
| MMC20OCR2      | $MMarchdsc[c] \rightarrow MMarchdsc[m]$                                                                    | 0     | 1000 | 12896.1                                                                                     | Mouse metabolic/transport demand<br>reaction |
| MMC20CPT1      | $MMhsc[c] + MMhsc[c] \rightarrow MMhsc[c] + MMhsc[c]$                                                      | 0     | 1000 |                                                                                             | Mouse metabolic/transport demand<br>reaction |
| MMC22COA4a     | $MMc22csc[c] \leftrightarrow MMc22csc[c]$                                                                  | -1000 | 1000 |                                                                                             | Mouse metabolic/transport demand<br>reaction |
| MMC22CPT1      | $MMhsc[c] + MMc22csc[c] \rightarrow MMhsc[c] + MMc22csc[c]$                                                | 0     | 1000 |                                                                                             | Mouse metabolic/transport demand<br>reaction |
| MMC22CPT2      | $MMcsc[m] + MMc22csc[m] \rightarrow MMcsc[m] + MMc22csc[m]$                                                | 0     | 1000 | 12895.4 or 12894.1 or 78070.1 or 12895.2 or 12895.3 or 12895.1                              | Mouse metabolic/transport demand<br>reaction |
| MMC22OCR2      | $MMc22csc[c] \rightarrow MMc22csc[m]$                                                                      | 0     | 1000 | 12896.1                                                                                     | Mouse metabolic/transport demand<br>reaction |
| MMC2M2SDCOAHLn | $MMh2zsc[m] + MMc2m2sdsc[m] \leftrightarrow MMh2zsdsc[m]$                                                  | -1000 | 1000 |                                                                                             | Mouse metabolic/transport demand<br>reaction |
| MMC2M2SDCOAHLx | $MMh2z[c] + MMc2m2sdsc[c] \leftrightarrow MMh2zsdsc[c]$                                                    | -1000 | 1000 | 11992.1 or 231086.1 or 97212.1                                                              | Mouse metabolic/transport demand<br>reaction |
| MMC3STDHPr     | $MMdup[r] + MM44myn_ar1[r] \rightarrow MMh[r] + MMdup[r] + MM44myn_ar2[r] + MMcsc[r]$                      | 0     | 1000 | 74447.1 or 51798.1                                                                          | Mouse metabolic/transport demand<br>reaction |
| MMC3STDHr      | $MM44myn_ar1[r] + MMdup[r] \rightarrow MMh[r] + MM44myn_ar2[r] + MMcsc[r] + MMdup[r]$                      | 0     | 1000 | 18194.1                                                                                     | Mouse metabolic/transport demand<br>reaction |
| MMC3STR2r      | $MMh[r] + MMdup[r] + MM44myn_ar2[r] \rightarrow MMdup[r] + MM44myn_ar1[r]$                                 | 0     | 1000 | 18194.1                                                                                     | Mouse metabolic/transport demand<br>reaction |
| MMC4STMO1r     | $3 MMc2z[r] + 3 MMh[r] + 3 MMdup[r] + MM44myn_ar1[r] \rightarrow 4 MMh2z[r] + 3 MMdup[r] + MM44myn_ar2[r]$ | 0     | 1000 | 15488.1                                                                                     | Mouse metabolic/transport demand<br>reaction |
| MMC4STMO2p     | $MMc2z[r] + MMdup[r] + MM44myn_ar2[r] \rightarrow MMh[r] + MMdup[r] + MMc2z[r] + MMcsc[m]$                 | 0     | 1000 | 66234.1                                                                                     | Mouse metabolic/transport demand<br>reaction |
| MMC4STMO2r     | $MMc2z[r] + MM44myn_ar2[r] + MMdup[r] \rightarrow MMh[r] + MMc2z[r] + MMdup[r] + MM44myn_ar1[r]$           | 0     | 1000 | 18194.1                                                                                     | Mouse metabolic/transport demand<br>reaction |
| MMC4ATPS       | $MMh2z[c] + MMdup[c] + 2 MMc2z[c] \rightarrow MMdup[c] + MMh[c] + MMh2z[c] + 2 MMc2z[c]$                   | 0     | 1000 | 66234.1 or 18194.1                                                                          | Mouse metabolic/transport demand<br>reaction |
| MMC4AMP        | $MMh2z[c] + MMdup[c] + MMcamp[c] \rightarrow MMh[c] + MMdup[c] + MMh2z[c] + MMcamp[c]$                     | 0     | 1000 | 11941.1 or 67972.1 or 381290.1 or 320707.1                                                  | Mouse metabolic/transport demand<br>reaction |
| MMC4ARNCc      | $MMh2z[c] + MMcamp[c] \leftrightarrow MMh[c] + MMcamp[c]$                                                  | -1000 | 1000 | 27416.1 or 27416.2 or 239273.1                                                              | Mouse metabolic/transport demand<br>reaction |
| MMC4AROr       | $MMcamp[c] \leftrightarrow MMcamp[c]$                                                                      | 0     | 1000 | (338403.1 or 66054.1)                                                                       | Mouse metabolic/transport demand<br>reaction |
| MMC4ARPEPT1c   | $MMh[u] + MMcamp[u] \rightarrow MMh[c] + MMcamp[c]$                                                        | 0     | 1000 |                                                                                             | Mouse metabolic/transport demand<br>reaction |
| MMC4ARVOLA     | $MMcamp[c] \leftrightarrow MMcamp[c]$                                                                      | 0     | 1000 | 215335.1                                                                                    | Mouse metabolic/transport demand<br>reaction |
| MMC4ARPTc      | $MMcamp[c] \rightarrow MMh[c] + MMcamp[c]$                                                                 | 0     | 1000 |                                                                                             | Mouse metabolic/transport demand<br>reaction |
| MMC4ATp        | $MMh2z[c] + MMh2z[c] \rightarrow MMh2z[c] + 2 MMh2z[c]$                                                    | 0     | 1000 | (65221.1 or 100561.1)                                                                       | Mouse metabolic/transport demand<br>reaction |
| MMC4ATm        | $2 MMh2z[m] \rightarrow MMh2z[m] + 2 MMh2z[m]$                                                             | 0     | 1000 | 12359.1                                                                                     | Mouse metabolic/transport demand<br>reaction |
| MMC4ATp        | $2 MMh2z[c] \rightarrow MMh2z[c] + 2 MMh2z[c]$                                                             | 0     | 1000 | 12359.1                                                                                     | Mouse metabolic/transport demand<br>reaction |
| MMC4Ar         | $3 MMh1[c] + MMc2z[c] \rightarrow 3 MMh1[c] + MMc2z[c]$                                                    | 0     | 1000 | 12359.1                                                                                     | Mouse metabolic/transport demand<br>reaction |
| MMC4L2OR       | $MMh[c] + MMh2z[c] + 2 MMh2z[c] \rightarrow 2 MMh2z[c] + MMh2z[c] + 2 MMh2z[c]$                            | 0     | 1000 | 110893.1 or 110893.2 or 110891.1 or 20541.1 or 110893.3 or 110893.4 or 110893.5 or 110893.6 | Mouse metabolic/transport demand<br>reaction |
| MMC4L2m        | $MMh2z[c] \rightarrow MMh2z[m]$                                                                            | 0     | 1000 |                                                                                             | Mouse metabolic/transport demand<br>reaction |
| MMC4L2ATm      | $MMh[m] + MMdup[m] + MMh1[m] \leftrightarrow MMh2z[m] + MMdup[m]$                                          | -1000 | 1000 | 109136.1                                                                                    | Mouse metabolic/transport demand<br>reaction |
| MMC4BLTDc_r    | $MMh2z[c] \leftrightarrow MMh2z[c]$                                                                        | -1000 | 1000 | 109136.1                                                                                    | Mouse metabolic/transport demand<br>reaction |
| MMC4BLda       | $MMh2z[c] \rightarrow MMh2z[c]$                                                                            | 0     | 1000 |                                                                                             | Mouse metabolic/transport demand<br>reaction |
| MMC4BPPr       | $MMh[c] + MMh2z[c] + MMh2z[c] \rightarrow MMh2z[c] + MMh2z[c] + MMh2z[c]$                                  | 0     | 1000 | (14603.1 or 65969.1 or 93835.1)                                                             | Mouse metabolic/transport demand<br>reaction |
| MMC4BPS        | $MMh2z[c] + 2 MMh2z[c] + MMh2z[c] + MMh2z[c] \rightarrow 2 MMh2z[c] + 2 MMh2z[c] + MMh2z[c] + MMh2z[c]$    | 0     | 1000 | 14378.1 or 14377.1 or 68401.1                                                               | Mouse metabolic/transport demand<br>reaction |
| MMC4BPSm       | $2 MMh2z[m] + MMh2z[m] + MMh2z[m] \rightarrow 2 MMh2z[m] + 2 MMh2z[m] + MMh2z[m]$                          | 0     | 1000 | 69719.1                                                                                     | Mouse metabolic/transport demand<br>reaction |
| MMC4BPPr       | $MMh[c] + MMh2z[c] + MMh2z[c] \rightarrow MMh2z[c] + MMh2z[c] + MMh2z[c]$                                  | -1000 | 1000 | 227231.1 or 227231.2                                                                        | Mouse metabolic/transport demand<br>reaction |
| MMC4BR1        | $MMh[c] + MMh2z[c] + MMh2z[c] \rightarrow MMh2z[c] + MMh2z[c] + MMh2z[c]$                                  | 0     | 1000 |                                                                                             | Mouse metabolic/transport demand<br>reaction |
| MMC4BR2        | $MMh[c] + MMh2z[c] + MMh2z[c] \rightarrow MMh2z[c] + MMh2z[c] + MMh2z[c]$                                  | 0     | 1000 | 12408.1                                                                                     | Mouse metabolic/transport demand<br>reaction |
| MMC4A_D3h      | $MMc2z[c] \rightarrow MMc2z[c]$                                                                            | 0     | 1000 | 12408.1                                                                                     | Mouse metabolic/transport demand<br>reaction |
| MMC4A_D3m      | $MMc2z[m] \rightarrow MMc2z[m]$                                                                            | 0     | 1000 |                                                                                             | Mouse metabolic/transport demand<br>reaction |
| MMC4BPTi       | $MMh2z[c] + MMh2z[c] \rightarrow MMh2z[c] + MMh2z[c]$                                                      | -1000 | 1000 |                                                                                             | Mouse metabolic/transport demand<br>reaction |
| MMC4PDAGm      | $MMh2z[c] + MMh2z[c] \rightarrow MMh2z[c] + MMh2z[c]$                                                      | -1000 | 1000 | 52858.1 or 52858.2                                                                          | Mouse metabolic/transport demand<br>reaction |
| MMC4DS         | $MMh[c] + MMh2z[c] + MMh2z[c] \rightarrow MMh2z[c] + MMh2z[c] + MMh2z[c]$                                  | 0     | 1000 |                                                                                             | Mouse metabolic/transport demand<br>reaction |
| MMC4DSm        | $MMh[m] + MMh2z[m] + MMh2z[m] \rightarrow MMh2z[m] + MMh2z[m] + MMh2z[m]$                                  | 0     | 1000 | 74596.1                                                                                     | Mouse metabolic/transport demand<br>reaction |
| MMC4EPTC       | $MMh2z[c] + MMh2z[c] \rightarrow MMh2z[c] + MMh2z[c]$                                                      | 0     | 1000 | 11091.1                                                                                     | Mouse metabolic/transport demand<br>reaction |
| MMC4EPTi       | $MMh2z[c] + MMh2z[c] \rightarrow MMh2z[c] + MMh2z[c]$                                                      | 0     | 1000 | 212662.1 or 99712.1                                                                         | Mouse metabolic/transport demand<br>reaction |
| MMC4ERK        | $MMh2z[c] + MMh2z[c] \rightarrow MMh2z[c] + MMh2z[c]$                                                      | 0     | 1000 | 99712.1                                                                                     | Mouse metabolic/transport demand<br>reaction |
| MMC4ERT1g      | $MMh2z[c] + MMh2z[c] \rightarrow MMh2z[c] + MMh2z[c]$                                                      | -1000 | 1000 | 223753.1 or 223753.2                                                                        | Mouse metabolic/transport demand<br>reaction |
| MMC4ERT1r      | $MMh2z[c] + MMh2z[c] \rightarrow MMh2z[c] + MMh2z[c]$                                                      | -1000 | 1000 | 68018.1                                                                                     | Mouse metabolic/transport demand<br>reaction |
| MMC4ERT2g      | $MMh2z[c] + MMh2z[c] \rightarrow MMh2z[c] + MMh2z[c]$                                                      | -1000 | 1000 | 68018.1                                                                                     | Mouse metabolic/transport demand<br>reaction |
| MMC4ERT2r      | $MMh2z[c] + MMh2z[c] \rightarrow MMh2z[c] + MMh2z[c]$                                                      | -1000 | 1000 | 68018.1                                                                                     | Mouse metabolic/transport demand<br>reaction |
| MMC4GLY2_2     | $2 MMh2z[c] + MMh2z[c] \rightarrow 2 MMh2z[c] + MMh2z[c]$                                                  | 0     | 1000 | 68018.1                                                                                     | Mouse metabolic/transport demand<br>reaction |
| MMC4GMP        | $MMh2z[c] + MMh2z[c] + MMh2z[c] \rightarrow MMh2z[c] + MMh2z[c] + MMh2z[c]$                                | 0     | 1000 | 57738.1                                                                                     | Mouse metabolic/transport demand<br>reaction |
| MMC4H2H        | $MMh2z[c] + MMh2z[c] + MMh2z[c] \rightarrow MMh2z[c] + MMh2z[c] + MMh2z[c]$                                | 0     | 1000 | 27416.1 or 27416.2 or 239273.1                                                              | Mouse metabolic/transport demand<br>reaction |
| MMC4HAT        | $MMh2z[c] + MMh2z[c] \rightarrow MMh2z[c] + MMh2z[c]$                                                      | -1000 | 1000 | 12642.1                                                                                     | Mouse metabolic/transport demand<br>reaction |
| MMC4HATr       | $MMh2z[c] + MMh2z[c] \rightarrow MMh2z[c] + MMh2z[c]$                                                      | -1000 | 1000 | 12647.1 or 12647.2 or 12647.3 or 12647.4                                                    | Mouse metabolic/transport demand<br>reaction |
| MMC4HLP        | $MMh2z[c] + MMh2z[c] \rightarrow MMh2z[c] + MMh2z[c]$                                                      | 0     | 1000 | 12647.1 or 12647.2 or 12647.3 or 12647.4                                                    | Mouse metabolic/transport demand<br>reaction |
| MMC4HPCD       | $MMh2z[c] + MMh2z[c] \rightarrow MMh2z[c] + MMh2z[c]$                                                      | 0     | 1000 | 237928.1                                                                                    | Mouse metabolic/transport demand<br>reaction |
| MMC4Hm         | $MMh2z[c] \leftrightarrow MMh2z[m]$                                                                        | -1000 | 1000 | 13026.1 or 236899.1                                                                         | Mouse metabolic/transport demand<br>reaction |
| MMC4HOLABCAet  | $MMh2z[c] + MMh2z[c] + MMh2z[c] \rightarrow MMh2z[c] + MMh2z[c] + MMh2z[c]$                                | 0     | 1000 |                                                                                             | Mouse metabolic/transport demand<br>reaction |
| MMC4HOLABce    | $MMh2z[c] + MMh2z[c] + MMh2z[c] \rightarrow MMh2z[c] + MMh2z[c] + MMh2z[c]$                                | 0     | 1000 | 11303.1                                                                                     | Mouse metabolic/transport demand<br>reaction |
| MMC4HOLAT2     | $2 MMh2z[c] + MMh2z[c] \rightarrow 2 MMh2z[c] + MMh2z[c]$                                                  | 0     | 1000 | (27499.1 or 67470.1)                                                                        | Mouse metabolic/transport demand<br>reaction |
| MMC4HOLAT3     | $MMh2z[c] + MMh2z[c] + MMh2z[c] \rightarrow MMh2z[c] + MMh2z[c] + MMh2z[c]$                                | 0     | 1000 | 20494.1 or 20495.1                                                                          | Mouse metabolic/transport demand<br>reaction |
| MMC4HOLD2m     | $MMh2z[m] + MMh2z[m] \rightarrow MMh2z[m] + MMh2z[m]$                                                      | 0     | 1000 | 27413.1 or 76408.2 or 76408.3 or 76408.1                                                    | Mouse metabolic/transport demand<br>reaction |
| MMC4HOLESTTDc  | $MMh2z[c] \rightarrow MMh2z[c]$                                                                            | 0     | 1000 | 218865.1                                                                                    | Mouse metabolic/transport demand<br>reaction |
| MMC4HOLETDh    | $MMh2z[c] \leftrightarrow MMh2z[c]$                                                                        | -1000 | 1000 |                                                                                             | Mouse metabolic/transport demand<br>reaction |
| MMC4HOLK       | $MMh2z[c] + MMh2z[c] \rightarrow MMh2z[c] + MMh2z[c]$                                                      | 0     | 1000 |                                                                                             | Mouse metabolic/transport demand<br>reaction |
| MMC4HOLNPc     | $MMh2z[c] \rightarrow MMh2z[c]$                                                                            | 0     | 1000 | 12651.1 or 12660.1 or 12651.2 or 12660.2                                                    | Mouse metabolic/transport demand<br>reaction |

|                 |                                                                                            |       |      |                                                                                                       |                                              |
|-----------------|--------------------------------------------------------------------------------------------|-------|------|-------------------------------------------------------------------------------------------------------|----------------------------------------------|
| MMCHOLPu        | $MMcho[p] \rightleftharpoons MMcho[p]_g$                                                   | -1000 | 1000 | 237636.1                                                                                              | Mouse metabolic/transport demand<br>reaction |
| MMCHOLPi        | $MMcho[p] \rightleftharpoons MMcho[p]_i$                                                   | -1000 | 1000 |                                                                                                       | Mouse metabolic/transport demand<br>reaction |
| MMCHOL4         | $MMfu[i] + MMcho[e] \rightleftharpoons MMfu[i] + MMcho[e]$                                 | 0     | 1000 |                                                                                                       | Mouse metabolic/transport demand<br>reaction |
| MMCHOL4g        | $MMcho[g] \rightleftharpoons MMcho[e]$                                                     | -1000 | 1000 | 63993.1                                                                                               | Mouse metabolic/transport demand<br>reaction |
| MMCHOLm         | $MMcho[e] \rightleftharpoons MMcho[p]$                                                     | -1000 | 1000 |                                                                                                       | Mouse metabolic/transport demand<br>reaction |
| MMCHOLu         | $MMcho[e] \rightleftharpoons MMcho[e]$                                                     | -1000 | 1000 |                                                                                                       | Mouse metabolic/transport demand<br>reaction |
| MMCHOLu         | $MMcho[e] \rightleftharpoons MMcho[e]$                                                     | 0     | 1000 |                                                                                                       | Mouse metabolic/transport demand<br>reaction |
| MMCHOLu         | $MMcho[e] \rightleftharpoons MMcho[e]$                                                     | 0     | 1000 |                                                                                                       | Mouse metabolic/transport demand<br>reaction |
| MMCHSTEROL.SULT | $MMpup[e] + MMchsterol[e] \rightarrow MMb[e] + MMpup[e] + MMchsterol[e]$                   | 0     | 1000 | 20518.1 or 20520.1 or 20518.2                                                                         | Mouse metabolic/transport demand<br>reaction |
| MMCHSTEROL1     | $MMb2[e] + MMapp[e] + MMchsterol[e] \rightarrow MMb[e] + MMb[e] + MMp[e] + MMchsterol[e]$  | 0     | 1000 | 54200.1                                                                                               | Mouse metabolic/transport demand<br>reaction |
| MMCHSTEROL1     | $MMchsterol[i] \rightleftharpoons MMchsterol[m]$                                           | -1000 | 1000 | 11303.1                                                                                               | Mouse metabolic/transport demand<br>reaction |
| MMCHSTEROL2     | $MMchsterol[e] \rightleftharpoons MMchsterol[m]$                                           | -1000 | 1000 | 59045.1                                                                                               | Mouse metabolic/transport demand<br>reaction |
| MMCHSTEROL3     | $MMchsterol[e] \rightleftharpoons MMchsterol[m]$                                           | -1000 | 1000 |                                                                                                       | Mouse metabolic/transport demand<br>reaction |
| MMCHSTEROL4g    | $MMb2[e] + MMpup[e] + MMchsterol[g] \rightarrow MMb[e] + MMb[e] + MMp[e] + MMchsterol[e]$  | 0     | 1000 |                                                                                                       | Mouse metabolic/transport demand<br>reaction |
| MMCHTNASe       | $2 MMb2[e] + MMchm[e] \rightarrow 3 MMacugm[e]$                                            | 0     | 1000 | 11303.1                                                                                               | Mouse metabolic/transport demand<br>reaction |
| MMCHTNASeE      | $2 MMb2[e] + MMchm[e] \rightarrow 3 MMacugm[e]$                                            | 0     | 1000 | 81600.1 or 71884.1 or 67729.1                                                                         | Mouse metabolic/transport demand<br>reaction |
| MMCTTL          | $MMcu[e] \rightarrow MMcu[e] + MMbma[e]$                                                   | 0     | 1000 | 81600.2                                                                                               | Mouse metabolic/transport demand<br>reaction |
| MMCTMCOA8u      | $MMb2[m] + MMfaccu[m] \rightleftharpoons MMchmso-L[m]$                                     | -1000 | 1000 | 69634.1 or 69634.2                                                                                    | Mouse metabolic/transport demand<br>reaction |
| MMCTMCOA8m      | $MMchmso-L[m] \rightarrow MMp[m] + MMfaccu[m]$                                             | 0     | 1000 |                                                                                                       | Mouse metabolic/transport demand<br>reaction |
| MMCTT8m         | $MMcfr-L[m] \rightleftharpoons MMcfr-L[e]$                                                 | -1000 | 1000 |                                                                                                       | Mouse metabolic/transport demand<br>reaction |
| MMCTT4_2        | $2 MMbma[e] + MMb[e] \rightleftharpoons 2 MMbma[e] + MMb[e]$                               | 0     | 1000 | 18408.1 or 83885.1                                                                                    | Mouse metabolic/transport demand<br>reaction |
| MMCTT4_4        | $4 MMbma[e] + MMb[e] \rightleftharpoons 4 MMbma[e] + MMb[e]$                               | 0     | 1000 | 20500.1                                                                                               | Mouse metabolic/transport demand<br>reaction |
| MMCTT4m         | $MMb[e] + MMbma-L[m] \rightleftharpoons MMb[e] + MMbma-L[e]$                               | -1000 | 1000 | 237831.1                                                                                              | Mouse metabolic/transport demand<br>reaction |
| MMCTT8m         | $MMb[e] + MMpup[m] \rightleftharpoons MMpup[e] + MMb[e]m$                                  | -1000 | 1000 | 13358.1                                                                                               | Mouse metabolic/transport demand<br>reaction |
| MMCK            | $MMay[m] + MMcrau[m] \rightleftharpoons MMb[m] + MMpura[m]$                                | 0     | 1000 | 13358.1                                                                                               | Mouse metabolic/transport demand<br>reaction |
| MMCKc           | $MMbup[e] + MMcrau[e] \rightleftharpoons MMbup[e] + MMpura[e]$                             | -1000 | 1000 | 76722.1                                                                                               | Mouse metabolic/transport demand<br>reaction |
| MMCLFORux       | $2 MMb[e] + MMb[e] \rightarrow MMb[e] + 2 MMb[e]$                                          | 0     | 1000 | 12709.1 or 12715.1                                                                                    | Mouse metabolic/transport demand<br>reaction |
| MMCLFORux2      | $MMb[e] + 2 MMb[e] \rightarrow 2 MMb[e] + MMb[e]$                                          | 0     | 1000 | 23985.1                                                                                               | Mouse metabolic/transport demand<br>reaction |
| MMCLJCO3ux2     | $MMbco3[e] + 2 MMb[e] \rightarrow MMbco3[e] + 2 MMb[e]$                                    | 0     | 1000 | 171429.1 or 171429.2 or 171429.3                                                                      | Mouse metabolic/transport demand<br>reaction |
| MMCLHCOux       | $2 MMbco3[e] + MMb[e] \rightarrow 2 MMbco3[e] + MMb[e]$                                    | 0     | 1000 | 171429.1 or 171429.2 or 171429.3                                                                      | Mouse metabolic/transport demand<br>reaction |
| MMCLJ2ux        | $MMb[e] + 2 MMb[e] \rightarrow MMb[e] + 2 MMb[e]$                                          | 0     | 1000 | 13487.1 or 224661.1 or 208890.1 or 224661.2 or 120718.1 or 13521.1 or 23985.1 or 208890.2 or 320718.2 | Mouse metabolic/transport demand<br>reaction |
| MMCLJHux2       | $MMb[e] + 2 MMb[e] \rightarrow 2 MMb[e] + MMb[e]$                                          | 0     | 1000 | 23985.1                                                                                               | Mouse metabolic/transport demand<br>reaction |
| MMCLJXux2       | $2 MMb[e] + MMbco3[e] \rightarrow 2 MMb[e] + MMbco3[e]$                                    | 0     | 1000 | 171429.1 or 171429.2 or 171429.3                                                                      | Mouse metabolic/transport demand<br>reaction |
| MMCLPNDCOAax    | $MMclpndco3[e] \rightleftharpoons MMclpndco3[e]$                                           | -1000 | 1000 | 171429.1 or 171429.2 or 171429.3                                                                      | Mouse metabolic/transport demand<br>reaction |
| MMCLPNDCTP1     | $MMbup[e] + MMclpndco3[e] \rightarrow MMbco3[e] + MMclpndco3[e]$                           | 0     | 1000 |                                                                                                       | Mouse metabolic/transport demand<br>reaction |
| MMCLPNDCTP2     | $MMbco3[m] + MMclpndco3[m] \rightarrow MMbup[m] + MMclpndco3[m]$                           | 0     | 1000 | 12895.4 or 12894.1 or 78070.1 or 12895.2 or 12895.3 or 12895.1                                        | Mouse metabolic/transport demand<br>reaction |
| MMCLPNDCTRN     | $MMclpndco3[e] \rightarrow MMclpndco3[m]$                                                  | 0     | 1000 | 12896.1                                                                                               | Mouse metabolic/transport demand<br>reaction |
| MMCLPNDd        | $MMclpnd[e] \rightleftharpoons MMclpnd[e]$                                                 | 0     | 1000 | 57279.1                                                                                               | Mouse metabolic/transport demand<br>reaction |
| MMCLS_3u        | $MMclpndag_hu[e] + MMpup_hu[e] \rightarrow MMb[e] + MMbup[e] + MMbma_hu[e]$                | 0     | 1000 |                                                                                                       | Mouse metabolic/transport demand<br>reaction |
| MMCMPCACAu      | $MMbupacm[e] + MMbup[e] \rightleftharpoons MMbup[e] + MMbupacm[g]$                         | -1000 | 1000 | 66586.1                                                                                               | Mouse metabolic/transport demand<br>reaction |
| MMCMPCACAu      | $MMbupacm[e] + MMbup[e] \rightleftharpoons MMbup[e] + MMbupacm[g]$                         | 0     | 1000 | 24060.1                                                                                               | Mouse metabolic/transport demand<br>reaction |
| MMCMPSAS        | $MMbupacm[e] + MMbup[e] \rightarrow MMbup[e] + MMbupacm[e]$                                | 0     | 1000 |                                                                                                       | Mouse metabolic/transport demand<br>reaction |
| MMCMPSASu       | $MMbupacm[e] + MMbup[e] \rightarrow MMbupacm[e] + MMbup[e]$                                | 0     | 1000 | 12764.1                                                                                               | Mouse metabolic/transport demand<br>reaction |
| MMCO2u          | $MMco2[e] \rightleftharpoons MMco2[e]$                                                     | 0     | 1000 | 12764.1                                                                                               | Mouse metabolic/transport demand<br>reaction |
| MMCO2er         | $MMco2[e] \rightleftharpoons MMco2[e]$                                                     | -1000 | 1000 |                                                                                                       | Mouse metabolic/transport demand<br>reaction |
| MMCO2g          | $MMco2[e] \rightleftharpoons MMco2[g]$                                                     | -1000 | 1000 |                                                                                                       | Mouse metabolic/transport demand<br>reaction |
| MMCO2m          | $MMco2[e] \rightleftharpoons MMco2[m]$                                                     | -1000 | 1000 |                                                                                                       | Mouse metabolic/transport demand<br>reaction |
| MMCO2u          | $MMco2[m] \rightleftharpoons MMco2[e]$                                                     | -1000 | 1000 |                                                                                                       | Mouse metabolic/transport demand<br>reaction |
| MMCO2p          | $MMco2[e] \rightleftharpoons MMco2[p]$                                                     | -1000 | 1000 |                                                                                                       | Mouse metabolic/transport demand<br>reaction |
| MMCOAg          | $MMco3[e] \rightleftharpoons MMco3[g]$                                                     | -1000 | 1000 |                                                                                                       | Mouse metabolic/transport demand<br>reaction |
| MMCOag          | $MMco3[e] \rightleftharpoons MMco3[g]$                                                     | -1000 | 1000 |                                                                                                       | Mouse metabolic/transport demand<br>reaction |
| MMCOam          | $MMco3[e] \rightleftharpoons MMco3[m]$                                                     | -1000 | 1000 |                                                                                                       | Mouse metabolic/transport demand<br>reaction |
| MMCOAu          | $MMco3[e] \rightleftharpoons MMco3[u]$                                                     | -1000 | 1000 |                                                                                                       | Mouse metabolic/transport demand<br>reaction |
| MMCOAu          | $MMco3[e] \rightleftharpoons MMco3[u]$                                                     | -1000 | 1000 | 73132.1                                                                                               | Mouse metabolic/transport demand<br>reaction |
| MMCOAp          | $MMco3[e] \rightleftharpoons MMco3[u]$                                                     | -1000 | 1000 |                                                                                                       | Mouse metabolic/transport demand<br>reaction |
| MMCOAr          | $MMco3[e] \rightleftharpoons MMco3[u]$                                                     | -1000 | 1000 |                                                                                                       | Mouse metabolic/transport demand<br>reaction |
| MMCORECBES      | $MMb2[e] + MMbco3[e] \rightarrow MMb[e] + MMb[e] + MMbup[e]$                               | 0     | 1000 |                                                                                                       | Mouse metabolic/transport demand<br>reaction |
| MMCOQ3m         | $MMbup[m] + MM2dpmbuq[m] \rightarrow MMb[m] + MMbco3[m] + MMb[e]m$                         | 0     | 1000 | 436059.1                                                                                              | Mouse metabolic/transport demand<br>reaction |
| MMCOQ5m         | $MMbup[m] + MM2dpmbuq[m] \rightarrow MMb[m] + MMbco3[m] + MM2dpmbuq[m]$                    | 0     | 1000 | 238027.1                                                                                              | Mouse metabolic/transport demand<br>reaction |
| MMCOQ6m         | $MMb2[m] + MM2dpmbuq[m] \rightarrow MMb2[m] + MM2dpmbuq[m]$                                | 0     | 1000 |                                                                                                       | Mouse metabolic/transport demand<br>reaction |
| MMCOQ7m         | $MMb[m] + MMbup[m] + MMb2[m] + MM2dpmbuq[m] \rightarrow MMb2[m] + MMbup[m] + MM2dpmbuq[m]$ | 0     | 1000 | 217707.1 or 217707.2                                                                                  | Mouse metabolic/transport demand<br>reaction |
| MMCORE3GTg      | $MMbupacm[g] + MMbup_acm[g] \rightarrow MMb[g] + MMbup[g] + MMburef[g]$                    | 0     | 1000 | 12850.1                                                                                               | Mouse metabolic/transport demand<br>reaction |
| MMCORE3GTg      | $MMbupacm[g] + MMbup_acm[g] \rightarrow MMb[g] + MMbup[g] + MMburef[g]$                    | 0     | 1000 | 272411.1                                                                                              | Mouse metabolic/transport demand<br>reaction |
| MMCORE4u        | $MMbupacm[g] \rightarrow MMbupacm[g]$                                                      | 0     | 1000 | 72077.1                                                                                               | Mouse metabolic/transport demand<br>reaction |
| MMCORE5GTg      | $MMbupacm[g] + MMbup_acm[g] \rightarrow MMb[g] + MMbup[g] + MMburef[g]$                    | 0     | 1000 |                                                                                                       | Mouse metabolic/transport demand<br>reaction |
| MMCORE5u        | $MMbupacm[g] \rightarrow MMbupacm[g]$                                                      | 0     | 1000 |                                                                                                       | Mouse metabolic/transport demand<br>reaction |
| MMCORE5GTg      | $MMbupacm[g] + MMbup_acm[g] \rightarrow MMb[g] + MMbup[g] + MMburef[g]$                    | 0     | 1000 |                                                                                                       | Mouse metabolic/transport demand<br>reaction |
| MMCORE5GTg      | $MMbupacm[g] + MMbup_acm[g] \rightarrow MMb[g] + MMbup[g] + MMburef[g]$                    | 0     | 1000 | 14537.1                                                                                               | Mouse metabolic/transport demand<br>reaction |
| MMCORE7u        | $MMbupacm[g] \rightarrow MMbupacm[g]$                                                      | 0     | 1000 |                                                                                                       | Mouse metabolic/transport demand<br>reaction |
| MMCORE8GTg      | $MMbupacm[g] + MMbup_acm[g] \rightarrow MMb[g] + MMbup[g] + MMburef[g]$                    | 0     | 1000 |                                                                                                       | Mouse metabolic/transport demand<br>reaction |
| MMCORE8u        | $MMbupacm[g] \rightarrow MMbupacm[g]$                                                      | 0     | 1000 |                                                                                                       | Mouse metabolic/transport demand<br>reaction |
| MMCOUCOAFm      | $MMbupacm[m] + MMbup_acm[m] \rightarrow MMbupacm[m] + MMbup_acm[m]$                        | 0     | 1000 |                                                                                                       | Mouse metabolic/transport demand<br>reaction |
| MMCOUMARINe     | $MMbupacm[e] \rightleftharpoons MMbupacm[e]$                                               | 0     | 1000 |                                                                                                       | Mouse metabolic/transport demand<br>reaction |
| MMCOu           | $MMbupacm[e] \rightleftharpoons MMbupacm[e]$                                               | -1000 | 0    |                                                                                                       | Mouse metabolic/transport demand<br>reaction |
| MMCPCTDTX       | $MMb[e] + MMbup[e] + MMbup_acm[e] \rightarrow MMbupacm[e] + MMbupacm[e]$                   | 0     | 1000 |                                                                                                       | Mouse metabolic/transport demand<br>reaction |
| MMCPFFGO        | $MMb2[e] + 2 MMb[e] + MMbupacm[e] \rightarrow 2 MMb2[e] + 2 MMb[e] + MMbupacm[e]$          | 0     | 1000 | 13026.1 or 236899.1                                                                                   | Mouse metabolic/transport demand<br>reaction |
| MMCREATH_2_x    | $2 MMbma[e] + MMbma[e] \rightleftharpoons 2 MMbma[e] + MMbma[e]$                           | 0     | 1000 | 12892.1                                                                                               | Mouse metabolic/transport demand<br>reaction |
| MMCREATHuiffr   | $MMbma[e] \rightarrow MMbma[e]$                                                            | 0     | 1000 | 102857.1                                                                                              | Mouse metabolic/transport demand<br>reaction |
| MMCRMPu         | $MMbupacm_hu[e] \rightleftharpoons MMbupacm_hu[e]$                                         | -1000 | 1000 |                                                                                                       | Mouse metabolic/transport demand<br>reaction |
| MMCRNCAR3p      | $MMbupacm[e] + MMbupacm[s] \rightarrow MMbupacm[e] + MMbupacm[s]$                          | 0     | 1000 |                                                                                                       | Mouse metabolic/transport demand<br>reaction |
| MMCRNCARp       | $MMbupacm[e] + MMbupacm[s] \rightarrow MMbupacm[e] + MMbupacm[s]$                          | 0     | 1000 |                                                                                                       | Mouse metabolic/transport demand<br>reaction |
| MMCRNt          | $MMbupacm[e] \rightleftharpoons MMbupacm[e]$                                               | 0     | 1000 |                                                                                                       | Mouse metabolic/transport demand<br>reaction |
| MMCRN4u         | $MMbupacm[e] + MMbupacm[e] \rightarrow MMbupacm[e] + MMbupacm[e]$                          | 0     | 1000 | 20520.1                                                                                               | Mouse metabolic/transport demand<br>reaction |
| MMCRN4m         | $MMbupacm[e] \rightarrow MMbupacm[e]$                                                      | 0     | 1000 | 30805.1                                                                                               | Mouse metabolic/transport demand<br>reaction |
| MMCRN4R         | $MMbupacm[e] \rightarrow MMbupacm[e]$                                                      | 0     | 1000 | 57279.1                                                                                               | Mouse metabolic/transport demand<br>reaction |
| MMCRN4u         | $MMbupacm[e] + MMbupacm[e] \rightarrow MMbupacm[e] + MMbupacm[e]$                          | 0     | 1000 | 30805.1                                                                                               | Mouse metabolic/transport demand<br>reaction |

|               |                                                                                               |       |      |                                                                                                                                                                                                                                        |                                              |
|---------------|-----------------------------------------------------------------------------------------------|-------|------|----------------------------------------------------------------------------------------------------------------------------------------------------------------------------------------------------------------------------------------|----------------------------------------------|
| MMCRNts       | MMdmnrcn[s] <=> MMdmnrcn[n]                                                                   | -1000 | 1000 | 20520.1                                                                                                                                                                                                                                | Mouse metabolic/transport demand<br>reaction |
| MMCRTNyn      | MMpcra[c] -> MMb[c] + MMp[c] + MMcrn[c]                                                       | 0     | 1000 |                                                                                                                                                                                                                                        | Mouse metabolic/transport demand<br>reaction |
| MMCRTSLi      | MMcrn[c] <=> MMcrn[c]                                                                         | 0     | 1000 |                                                                                                                                                                                                                                        | Mouse metabolic/transport demand<br>reaction |
| MMCRTSLm      | MMcrn[c] <=> MMcrn[m]                                                                         | -1000 | 1000 |                                                                                                                                                                                                                                        | Mouse metabolic/transport demand<br>reaction |
| MMCRTSLr      | MMcrn[c] <=> MMcrn[r]                                                                         | -1000 | 1000 |                                                                                                                                                                                                                                        | Mouse metabolic/transport demand<br>reaction |
| MMCRTSTRN     | MMcrn[c] <=> MMcrn[r]                                                                         | 0     | 1000 |                                                                                                                                                                                                                                        | Mouse metabolic/transport demand<br>reaction |
| MMCRTSTRNm    | MMcrn[c] <=> MMcrn[m]                                                                         | -1000 | 1000 |                                                                                                                                                                                                                                        | Mouse metabolic/transport demand<br>reaction |
| MMCRTSTRNr    | MMcrn[c] <=> MMcrn[r]                                                                         | -1000 | 1000 |                                                                                                                                                                                                                                        | Mouse metabolic/transport demand<br>reaction |
| MMCRVNCu      | MMcrn[c] <=> MMcrn[c]                                                                         | 0     | 1000 |                                                                                                                                                                                                                                        | Mouse metabolic/transport demand<br>reaction |
| MMCSAPASb     | MMb2[c] + MMcspg_a[l] -> MMSer_Gly_Ala_X_Gly[l] + MMcs_a[l]                                   | 0     | 1000 |                                                                                                                                                                                                                                        | Mouse metabolic/transport demand<br>reaction |
| MMCSBPASb     | MMb2[c] + MMcspg_b[l] -> MMSer_Gly_Ala_X_Gly[l] + MMcs_b[l]                                   | 0     | 1000 |                                                                                                                                                                                                                                        | Mouse metabolic/transport demand<br>reaction |
| MMCSCPASb     | MMb2[c] + MMcspg_c[l] -> MMSer_Gly_Ala_X_Gly[l] + MMcs_c[l]                                   | 0     | 1000 |                                                                                                                                                                                                                                        | Mouse metabolic/transport demand<br>reaction |
| MMCSFPASb     | MMb2[c] + MMcspg_d[l] -> MMSer_Gly_Ala_X_Gly[l] + MMcs_d[l]                                   | 0     | 1000 |                                                                                                                                                                                                                                        | Mouse metabolic/transport demand<br>reaction |
| MMCSFPASb     | MMb2[c] + MMcspg_e[l] -> MMSer_Gly_Ala_X_Gly[l] + MMcs_e[l]                                   | 0     | 1000 |                                                                                                                                                                                                                                        | Mouse metabolic/transport demand<br>reaction |
| MMCSNAT2m     | MMcoul[n] + MMpcrn[n] <=> MMppcoul[n] + MMcrn[n]                                              | -1000 | 1000 |                                                                                                                                                                                                                                        | Mouse metabolic/transport demand<br>reaction |
| MMCSNAT2s     | MMcrn[c] + MMdmnrcn[s] <=> MMcrn[c] + MMdmnrcn[s]                                             | -1000 | 1000 | 12908.1                                                                                                                                                                                                                                | Mouse metabolic/transport demand<br>reaction |
| MMCSNAT3s     | MMcrn[c] + MMppcoul[s] <=> MMcoul[s] + MMpcrn[s]                                              | -1000 | 1000 | 12908.2 or 74114.1                                                                                                                                                                                                                     | Mouse metabolic/transport demand<br>reaction |
| MMCSNATr      | MMlaccou[s] + MMcrn[c] <=> MMcoul[r] + MMlacc[r]                                              | -1000 | 1000 | 12908.2                                                                                                                                                                                                                                | Mouse metabolic/transport demand<br>reaction |
| MMCSNATm      | MMcoul[n] + MMpcrn[n] <=> MMcoul[n] + MMpcrn[n]                                               | -1000 | 1000 | 12908.3                                                                                                                                                                                                                                | Mouse metabolic/transport demand<br>reaction |
| MMCSNATp      | MMlaccou[s] + MMcrn[c] <=> MMcoul[p] + MMlacc[p]                                              | -1000 | 1000 | 12908.1                                                                                                                                                                                                                                | Mouse metabolic/transport demand<br>reaction |
| MMCSNATr      | MMlaccou[s] + MMcrn[c] <=> MMcoul[r] + MMlacc[r]                                              | -1000 | 1000 | 12908.2                                                                                                                                                                                                                                | Mouse metabolic/transport demand<br>reaction |
| MMCSND        | MMb2[c] + MMb[c] + MMcoul[c] -> MMb4[c] + MMlacc[c]                                           | 0     | 1000 |                                                                                                                                                                                                                                        | Mouse metabolic/transport demand<br>reaction |
| MMCSNt        | MMcoul[c] <=> MMcoul[c]                                                                       | 0     | 1000 |                                                                                                                                                                                                                                        | Mouse metabolic/transport demand<br>reaction |
| MMCSPG_Ai     | MMcspg_a[g] -> MMcspg_a[e]                                                                    | 0     | 1000 | 13340.1                                                                                                                                                                                                                                | Mouse metabolic/transport demand<br>reaction |
| MMCSPG_Ab     | MMcspg_a[e] -> MMcspg_a[l]                                                                    | 0     | 1000 |                                                                                                                                                                                                                                        | Mouse metabolic/transport demand<br>reaction |
| MMCSPG_Bi     | MMcspg_b[g] -> MMcspg_b[e]                                                                    | 0     | 1000 |                                                                                                                                                                                                                                        | Mouse metabolic/transport demand<br>reaction |
| MMCSPG_Bb     | MMcspg_b[e] -> MMcspg_b[l]                                                                    | 0     | 1000 |                                                                                                                                                                                                                                        | Mouse metabolic/transport demand<br>reaction |
| MMCSPG_Ci     | MMcspg_c[g] -> MMcspg_c[e]                                                                    | 0     | 1000 |                                                                                                                                                                                                                                        | Mouse metabolic/transport demand<br>reaction |
| MMCSPG_Cb     | MMcspg_c[e] -> MMcspg_c[l]                                                                    | 0     | 1000 |                                                                                                                                                                                                                                        | Mouse metabolic/transport demand<br>reaction |
| MMCSPG_Di     | MMcspg_d[g] -> MMcspg_d[e]                                                                    | 0     | 1000 |                                                                                                                                                                                                                                        | Mouse metabolic/transport demand<br>reaction |
| MMCSPG_Db     | MMcspg_d[e] -> MMcspg_d[l]                                                                    | 0     | 1000 |                                                                                                                                                                                                                                        | Mouse metabolic/transport demand<br>reaction |
| MMCSPG_Ei     | MMcspg_e[g] -> MMcspg_e[e]                                                                    | 0     | 1000 |                                                                                                                                                                                                                                        | Mouse metabolic/transport demand<br>reaction |
| MMCSPG_Eb     | MMcspg_e[e] -> MMcspg_e[l]                                                                    | 0     | 1000 |                                                                                                                                                                                                                                        | Mouse metabolic/transport demand<br>reaction |
| MMCSn         | MMb2[c] + MMlaccou[n] + MMcoul[n] -> MMb4[c] + MMlacc[n]                                      | 0     | 1000 |                                                                                                                                                                                                                                        | Mouse metabolic/transport demand<br>reaction |
| MMCTPS1       | MMb4[c] + MMlacc[c] + MMlacc[c] -> MMb4[c] + 2 MMb[c] + MMlacc[c] + MMlacc[c]                 | 0     | 1000 | 12974.1 or 12974.2                                                                                                                                                                                                                     | Mouse metabolic/transport demand<br>reaction |
| MMCTPS2       | MMb2[c] + MMlacc[c] + MMlacc[c] + MMlacc[c] -> MMb4[c] + 2 MMb[c] + MMlacc[c] + MMlacc[c]     | 0     | 1000 | 51797.1                                                                                                                                                                                                                                | Mouse metabolic/transport demand<br>reaction |
| MMCTPm        | MMlacc[c] <=> MMlacc[m]                                                                       | -1000 | 1000 | 55936.1 or 55936.2                                                                                                                                                                                                                     | Mouse metabolic/transport demand<br>reaction |
| MMCYANS1m     | MMcoul[n] + MMlacc[n] -> MMlacc[n] + MMcoul[n] + MMcoul[n]                                    | 0     | 1000 |                                                                                                                                                                                                                                        | Mouse metabolic/transport demand<br>reaction |
| MMCYANi       | MMcoul[c] <=> MMcoul[c]                                                                       | 0     | 1000 | 22117.1                                                                                                                                                                                                                                | Mouse metabolic/transport demand<br>reaction |
| MMCYANm       | MMcoul[n] <=> MMcoul[n]                                                                       | -1000 | 1000 |                                                                                                                                                                                                                                        | Mouse metabolic/transport demand<br>reaction |
| MMCYOOn2      | 8 MMb[n] + MMb2[n] + 4 MMlacc[C]m -> 4 MMb[c] + 2 MMb2[c] + 4 MMlacc[C]m                      | 0     | 1000 |                                                                                                                                                                                                                                        | Mouse metabolic/transport demand<br>reaction |
| MMCYOOn3      | 7.92 MMb[n] + MMb2[n] + 4 MMlacc[C]m -> 4 MMb[c] + 1.96 MMb2[c] + 4 MMlacc[C]m + 0.02 MMb2[c] | 0     | 0    |                                                                                                                                                                                                                                        | Mouse metabolic/transport demand<br>reaction |
| MMCYOR_410m   | 2 MMb[n] + 2 MMlacc[C]m + MMlacc[C]m -> 4 MMb[c] + MMlacc[C]m + 2 MMlacc[C]m                  | 0     | 1000 | 78174.1 or 12864.1 or 11532.1 or 75483.1 or 62998.1 or 331082.1 or 84682.1 or 12647.1 or 110323.1 or 12857.1 or 12865.1 or 12859.1 or 17708.1 or 12868.1 or 12866.1 or 66142.1 or 12858.1 or 12861.1 or 12862.1                        | Mouse metabolic/transport demand<br>reaction |
| MMCYALANaEx   | MMb1[c] + MMb4-L[c] + MMcys-L[c] -> MMb1[c] + MMb4-L[c] + MMcys-L[c]                          | 0     | 1000 | 22273.1 and 100042918.1 and 66152.1 and 66594.1 and 17711.1 and 67003.1 and 66694.1 and 66445.1 and 22272.1 and 67530.1 or 22273.1 and 100042918.1 and 17711.1 and 66594.1 and 67003.1 and 66445.1 and 66694.1 and 22272.1 and 67530.1 | Mouse metabolic/transport demand<br>reaction |
| MMCYASAM0     | MMb2[c] + MMcoul[c] -> 2 MMb[c] + MMlaccou[c]                                                 | 0     | 1000 | 20514.1 or 55963.1                                                                                                                                                                                                                     | Mouse metabolic/transport demand<br>reaction |
| MMCYASANNaEx  | MMb1[c] + MMb4-L[c] + MMcys-L[c] -> MMb1[c] + MMb4-L[c] + MMcys-L[c]                          | 0     | 1000 |                                                                                                                                                                                                                                        | Mouse metabolic/transport demand<br>reaction |
| MMCYATB0c     | 2 MMb1[u] + MMlacc[u] + MMcys-L[c] -> 2 MMb1[u] + MMlacc[u] + MMcys-L[c]                      | 0     | 1000 | 20514.1                                                                                                                                                                                                                                | Mouse metabolic/transport demand<br>reaction |
| MMCYSHOAT1Ac  | MMb1[u] + MMcys-L[c] -> MMb1[u] + MMcys-L[c]                                                  | 0     | 1000 | 56774.1                                                                                                                                                                                                                                | Mouse metabolic/transport demand<br>reaction |
| MMCYSLGNaEx   | MMb1[u] + MMcys-L[c] -> MMb1[u] + MMcys-L[c]                                                  | 0     | 1000 | (7008.1 or 74338.1 and 57394.1)                                                                                                                                                                                                        | Mouse metabolic/transport demand<br>reaction |
| MMCYSGLTH     | MMlaccou[c] + 2 MMlaccou[c] <=> 2 MMcys-L[c] + MMlaccou[c]                                    | -1000 | 1000 | 20514.1                                                                                                                                                                                                                                | Mouse metabolic/transport demand<br>reaction |
| MMCYSLGLUeR   | MMcys-L[c] + MMlacc-L[c] <=> MMcys-L[c] + MMlacc-L[c]                                         | -1000 | 1000 |                                                                                                                                                                                                                                        | Mouse metabolic/transport demand<br>reaction |
| MMCYSGLYe     | MMcys-L[c] + MMlacc-L[c] -> MMcys-L[c] + MMlacc-L[c]                                          | 0     | 1000 | 53896.1 or 17254.1                                                                                                                                                                                                                     | Mouse metabolic/transport demand<br>reaction |
| MMCYSLGLYeR   | MMcys-L[c] + MMlacc-L[c] <=> MMcys-L[c] + MMlacc-L[c]                                         | -1000 | 1000 | 50934.1 or 17254.1 or 50934.2                                                                                                                                                                                                          | Mouse metabolic/transport demand<br>reaction |
| MMCYSILELAT2c | MMcys-L[c] + MMlacc-L[c] -> MMcys-L[c] + MMlacc-L[c]                                          | 0     | 1000 | 53896.1 or 17254.1                                                                                                                                                                                                                     | Mouse metabolic/transport demand<br>reaction |
| MMCYSLYSL     | MMb2[c] + MMlaccou[c] -> MMb4[c] + MMlaccou[c]                                                | 0     | 1000 | (20539.1 and 17254.1)                                                                                                                                                                                                                  | Mouse metabolic/transport demand<br>reaction |
| MMCYSO        | MMb2[c] + MMcys-L[c] -> 2 MMb[c] + MMlaccou[c]                                                | 0     | 1000 |                                                                                                                                                                                                                                        | Mouse metabolic/transport demand<br>reaction |
| MMCYSPHILAT2c | MMcys-L[c] + MMlacc-L[c] -> MMcys-L[c] + MMlacc-L[c]                                          | 0     | 1000 | 12583.1                                                                                                                                                                                                                                | Mouse metabolic/transport demand<br>reaction |
| MMCYSSERNaEx  | MMb1[u] + MMcys-L[c] + MMlacc-L[c] -> MMb1[u] + MMcys-L[c] + MMlacc-L[c]                      | 0     | 1000 | (20539.1 and 17254.1)                                                                                                                                                                                                                  | Mouse metabolic/transport demand<br>reaction |
| MMCYSSNAT5c   | MMb[c] + MMb1[u] + MMcys-L[c] <=> MMb1[u] + MMb[c] + MMcys-L[c]                               | -1000 | 1000 | 20514.1 or 55963.1                                                                                                                                                                                                                     | Mouse metabolic/transport demand<br>reaction |
| MMCYSTA       | MMlacc[c] + MMcys-L[c] <=> MMlacc-L[c] + MMlaccou[c]                                          | -1000 | 1000 | 209637.1                                                                                                                                                                                                                               | Mouse metabolic/transport demand<br>reaction |
| MMCYSTALABATc | MMb4-L[c] + MMlaccou[n] -> MMb4-L[c] + MMlaccou[n]                                            | 0     | 1000 | 14718.1                                                                                                                                                                                                                                | Mouse metabolic/transport demand<br>reaction |
| MMCYSTAm      | MMlaccou[n] + MMcys-L[m] <=> MMlacc-L[m] + MMlaccou[n]                                        | -1000 | 1000 | (30962.1 and 20532.1)                                                                                                                                                                                                                  | Mouse metabolic/transport demand<br>reaction |
| MMCYSTGL      | MMb2[c] + MMcys-L[c] -> MMb4[c] + MMcys-L[c] + MMlaccou[c]                                    | 0     | 1000 | 14719.1                                                                                                                                                                                                                                | Mouse metabolic/transport demand<br>reaction |
| MMCYSTGLLex   | MMb4-L[c] + MMlaccou[n] -> MMlaccou[n] + MMb4-L[c]                                            | 0     | 1000 | 107869.1 or 107869.2                                                                                                                                                                                                                   | Mouse metabolic/transport demand<br>reaction |
| MMCYSTHNaEx   | MMb1[u] + MMcys-L[c] + MMlacc-L[c] -> MMb1[u] + MMcys-L[c] + MMlacc-L[c]                      | 0     | 1000 | 17254.1 and 26570.1                                                                                                                                                                                                                    | Mouse metabolic/transport demand<br>reaction |
| MMCYSTLEIBATc | MMb4-L[c] + MMlaccou[n] -> MMb4-L[c] + MMlaccou[n]                                            | 0     | 1000 | 20514.1 or 55963.1                                                                                                                                                                                                                     | Mouse metabolic/transport demand<br>reaction |
| MMCYSTS       | MMcys-L[c] + MMlacc-L[c] -> MMlaccou[c] + MMcys-L[c]                                          | 0     | 1000 | (30962.1 and 20532.1)                                                                                                                                                                                                                  | Mouse metabolic/transport demand<br>reaction |
| MMCYSTSERes   | MMlacc-L[c] + MMlaccou[n] -> MMlacc-L[c] + MMlaccou[n]                                        | 0     | 1000 | 12411.1                                                                                                                                                                                                                                | Mouse metabolic/transport demand<br>reaction |
| MMCYSD4       | MMb1[u] + MMcys-L[c] -> MMb1[u] + MMcys-L[c]                                                  | 0     | 1000 | 20532.1 and 30962.1                                                                                                                                                                                                                    | Mouse metabolic/transport demand<br>reaction |
| MMCYSec       | MMcys-L[c] <=> MMcys-L[c]                                                                     | 0     | 1000 | 56774.1                                                                                                                                                                                                                                | Mouse metabolic/transport demand<br>reaction |
| MMCYTD        | MMb2[c] + MMb[c] + MMcoul[c] -> MMb4[c] + MMlacc[c]                                           | 0     | 1000 | 215113.1                                                                                                                                                                                                                               | Mouse metabolic/transport demand<br>reaction |
| MMCYTDK1      | MMlacc[c] + MMcoul[c] -> MMlacc[c] + MMcoul[c]                                                | 0     | 1000 | 72269.1 or 11628.1                                                                                                                                                                                                                     | Mouse metabolic/transport demand<br>reaction |
| MMCYTDK2m     | MMlaccou[n] + MMcoul[n] -> MMlaccou[n] + MMcoul[n]                                            | 0     | 1000 | 22245.1 or 80914.1                                                                                                                                                                                                                     | Mouse metabolic/transport demand<br>reaction |
| MMCYTDs       | MMb2[c] + MMcoul[n] + MMlacc[n] -> MMb4[c] + MMlacc[n]                                        | 0     | 1000 |                                                                                                                                                                                                                                        | Mouse metabolic/transport demand<br>reaction |
| MMCYTDr       | MMcoul[c] <=> MMcoul[c]                                                                       | 0     | 1000 | 11628.1                                                                                                                                                                                                                                | Mouse metabolic/transport demand<br>reaction |
| MMCYTDm       | MMb1[u] + MMcoul[c] -> MMb1[u] + MMcoul[c]                                                    | 0     | 1000 | 13340.1 or 63099.1                                                                                                                                                                                                                     | Mouse metabolic/transport demand<br>reaction |
| MMCYTD5       | 2 MMb1[u] + MMcoul[c] -> 2 MMb1[u] + MMcoul[c]                                                | 0     | 1000 | 114304.1 or 434203.1 or 434203.2                                                                                                                                                                                                       | Mouse metabolic/transport demand<br>reaction |
| MMCYTDi       | MMcoul[c] <=> MMcoul[c]                                                                       | -1000 | 1000 | 114304.1                                                                                                                                                                                                                               | Mouse metabolic/transport demand<br>reaction |
| MMCYTDm       | MMcoul[c] <=> MMcoul[c]                                                                       | -1000 | 1000 | 71279.1                                                                                                                                                                                                                                | Mouse metabolic/transport demand<br>reaction |
| MMCYTDm       | MMcoul[c] <=> MMcoul[c]                                                                       | -1000 | 1000 | 63959.1                                                                                                                                                                                                                                | Mouse metabolic/transport demand<br>reaction |
| MMCYTK1       | MMlacc[c] + MMcoul[c] <=> MMlacc[c] + MMcoul[c]                                               | -1000 | 1000 |                                                                                                                                                                                                                                        | Mouse metabolic/transport demand<br>reaction |

|             |                                                                                 |       |      |                      |                                        |
|-------------|---------------------------------------------------------------------------------|-------|------|----------------------|----------------------------------------|
| MMCYTK10    | $MMcnp[e] + MMdnp[e] \Leftrightarrow MMdcnp[e] + MMdnp[e]$                      | -1000 | 1000 | 66588.1              | Moose metabo/transport demand reaction |
| MMCYTK10a   | $MMcnp[n] + MMdnp[n] \Leftrightarrow MMdcnp[n] + MMdnp[n]$                      | -1000 | 1000 | 66588.1              | Moose metabo/transport demand reaction |
| MMCYTK11    | $MMdnp[e] + MMdcnp[e] \Leftrightarrow MMdnp[e] + MMdcnp[e]$                     | -1000 | 1000 | 66588.1              | Moose metabo/transport demand reaction |
| MMCYTK11a   | $MMdnp[n] + MMdcnp[n] \Leftrightarrow MMdnp[n] + MMdcnp[n]$                     | -1000 | 1000 | 66588.1              | Moose metabo/transport demand reaction |
| MMCYTK12    | $MMdcnp[e] + MMdnp[e] \Leftrightarrow 2 MMdcnp[e]$                              | -1000 | 1000 | 66588.1              | Moose metabo/transport demand reaction |
| MMCYTK12a   | $MMdcnp[n] + MMdnp[n] \Leftrightarrow 2 MMdcnp[n]$                              | -1000 | 1000 | 66588.1              | Moose metabo/transport demand reaction |
| MMCYTK13    | $MMdnp[e] + MMdcnp[e] \Leftrightarrow MMdnp[e] + MMdcnp[e]$                     | -1000 | 1000 | 66588.1              | Moose metabo/transport demand reaction |
| MMCYTK13a   | $MMdcnp[n] + MMdnp[n] \Leftrightarrow MMdcnp[n] + MMdnp[n]$                     | -1000 | 1000 | 66588.1              | Moose metabo/transport demand reaction |
| MMCYTK14    | $MMnp[e] + MMdcnp[e] \Leftrightarrow MMdnp[e] + MMdcnp[e]$                      | -1000 | 1000 | 66588.1              | Moose metabo/transport demand reaction |
| MMCYTK14a   | $MMdcnp[n] + MMnp[n] \Leftrightarrow MMdnp[n] + MMdnp[n]$                       | -1000 | 1000 | 66588.1              | Moose metabo/transport demand reaction |
| MMCYTK1m    | $MMdnp[n] + MMcnp[n] \Leftrightarrow MMdnp[n] + MMcnp[n]$                       | -1000 | 1000 | 66588.1              | Moose metabo/transport demand reaction |
| MMCYTK1n    | $MMdnp[n] + MMcnp[n] \Leftrightarrow MMdnp[n] + MMcnp[n]$                       | -1000 | 1000 | 66588.1              | Moose metabo/transport demand reaction |
| MMCYTK2     | $MMnp[e] + MMdcnp[e] \Leftrightarrow MMdnp[e] + MMdcnp[e]$                      | -1000 | 1000 | 66588.1              | Moose metabo/transport demand reaction |
| MMCYTK2a    | $MMdnp[n] + MMdcnp[n] \Leftrightarrow MMdnp[n] + MMdcnp[n]$                     | -1000 | 1000 | 66588.1              | Moose metabo/transport demand reaction |
| MMCYTK3     | $MMnp[e] + MMcnp[e] \Leftrightarrow MMdnp[e] + MMdcnp[e]$                       | -1000 | 1000 | 66588.1              | Moose metabo/transport demand reaction |
| MMCYTK3a    | $MMcnp[n] + MMdcnp[n] \Leftrightarrow MMdcnp[n] + MMdcnp[n]$                    | -1000 | 1000 | 22949.1 or 22949.2   | Moose metabo/transport demand reaction |
| MMCYTK4     | $MMnp[e] + MMdcnp[e] \Leftrightarrow MMdnp[e] + MMdcnp[e]$                      | -1000 | 1000 | 66588.1              | Moose metabo/transport demand reaction |
| MMCYTK4a    | $MMcnp[n] + MMdnp[n] \Leftrightarrow MMdcnp[n] + MMdnp[n]$                      | -1000 | 1000 | 22949.1 or 22949.2   | Moose metabo/transport demand reaction |
| MMCYTK5     | $MMnp[e] + MMdcnp[e] \Leftrightarrow MMdnp[e] + MMdcnp[e]$                      | -1000 | 1000 | 66588.1              | Moose metabo/transport demand reaction |
| MMCYTK5a    | $MMcnp[n] + MMdnp[n] \Leftrightarrow MMdcnp[n] + MMdnp[n]$                      | -1000 | 1000 | 66588.1              | Moose metabo/transport demand reaction |
| MMCYTK6     | $MMcnp[e] + MMcnp[e] \Leftrightarrow 2 MMcnp[e]$                                | -1000 | 1000 | 66588.1              | Moose metabo/transport demand reaction |
| MMCYTK6a    | $MMcnp[n] + MMcnp[n] \Leftrightarrow 2 MMcnp[n]$                                | -1000 | 1000 | 66588.1              | Moose metabo/transport demand reaction |
| MMCYTK7     | $MMcnp[e] + MMdnp[e] \Leftrightarrow MMdnp[e] + MMdcnp[e]$                      | -1000 | 1000 | 66588.1              | Moose metabo/transport demand reaction |
| MMCYTK7a    | $MMcnp[n] + MMdnp[n] \Leftrightarrow MMdnp[n] + MMdnp[n]$                       | -1000 | 1000 | 66588.1              | Moose metabo/transport demand reaction |
| MMCYTK7b    | $MMdnp[e] + MMcnp[e] \Leftrightarrow MMdcnp[e] + MMdnp[e]$                      | -1000 | 1000 | 66588.1              | Moose metabo/transport demand reaction |
| MMCYTK8a    | $MMcnp[n] + MMdnp[n] \Leftrightarrow MMdnp[n] + MMdnp[n]$                       | -1000 | 1000 | 66588.1              | Moose metabo/transport demand reaction |
| MMCYTK9     | $MMcnp[e] + MMdnp[e] \Leftrightarrow MMdcnp[e] + MMdnp[e]$                      | -1000 | 1000 | 66588.1              | Moose metabo/transport demand reaction |
| MMCYTK9a    | $MMcnp[n] + MMdcnp[n] \Leftrightarrow MMdcnp[n] + MMdcnp[n]$                    | -1000 | 1000 | 66588.1              | Moose metabo/transport demand reaction |
| MMCyOne     | $MMdcnp[Cm] \rightarrow MMkcy[Cm] + Mde[Lm]$                                    | 0     | 1000 | 66588.1              | Moose metabo/transport demand reaction |
| MMD1AIBTm   | $MMpy[m] + MM3ab-D[m] \rightarrow MM2znpy[m] + MM3ab-L[m]$                      | -1000 | 1000 | 66588.1              | Moose metabo/transport demand reaction |
| MMDADA      | $MMb2c[e] + MMb[e] + MMd4-2[c] \rightarrow MMb4c[e] + MMd4c[e]$                 | 0     | 1000 | 66588.1              | Moose metabo/transport demand reaction |
| MMDADAE     | $MMb[e] + MMb2c[e] + MMd4-2[e] \rightarrow MMb4c[e] + MMd4c[e]$                 | 0     | 1000 | 11486.1              | Moose metabo/transport demand reaction |
| MMDADLNK    | $MMdnp[e] + MMd4-2[c] \rightarrow MMdnp[c] + MMb[e] + MMd4mp[c]$                | 0     | 1000 | 11486.1              | Moose metabo/transport demand reaction |
| MMDADN4     | $MMd4-2[e] \rightarrow MMd4-2[c]$                                               | 0     | 1000 | 66588.1              | Moose metabo/transport demand reaction |
| MMDAGHSTb   | $MMdng\_hst[e] \Leftrightarrow MMdng\_hst[c]$                                   | -1000 | 1000 | 66588.1              | Moose metabo/transport demand reaction |
| MMDAGRs3a   | $MMdnp[n] + MMdng\_hst[n] \Leftrightarrow MMb[n] + MMdnp[n] + MMrs\_hst[n]$     | -1000 | 1000 | 66588.1              | Moose metabo/transport demand reaction |
| MMDAG_HStcr | $MMdng\_hst[r] \rightarrow MMdng\_hst[c]$                                       | 0     | 1000 | 104418.1 or 320127.1 | Moose metabo/transport demand reaction |
| MMDAGr      | $MMdng\_hst[c] \Leftrightarrow MMdng\_hst[e]$                                   | -1000 | 1000 | 66588.1              | Moose metabo/transport demand reaction |
| MMDALAOXa   | $MMb2z[s] + MMb2c[s] + MM4b-D[s] \rightarrow MMb2z[s] + MMdpy[s] + MMb4b[L]$    | 0     | 1000 | 66588.1              | Moose metabo/transport demand reaction |
| MMDALAGr    | $MMb[e] + MM4b-D[c] \rightarrow MMb[c] + MM4b-D[c]$                             | 0     | 1000 | 13142.1              | Moose metabo/transport demand reaction |
| MMDALAGL    | $MMb[e] + MM4b-D[s] \rightarrow MMb[c] + MM4b-D[c]$                             | -1000 | 1000 | 21533.1              | Moose metabo/transport demand reaction |
| MMDALAat    | $MM4b-D[c] \rightarrow MM4b-D[s]$                                               | 0     | 1000 | 21533.1              | Moose metabo/transport demand reaction |
| MMDARGOp    | $MMb2z[s] + MMb2c[s] + MMdng-D[s] \rightarrow MMb2z[s] + MMb4b[s] + MMd3zwp[s]$ | 0     | 1000 | 66588.1              | Moose metabo/transport demand reaction |
| MMDASCBH    | $MMb2c[c] + MMhdusch[c] \rightarrow MMb[c] + MMd3zwp[c]$                        | 0     | 1000 | 13142.1              | Moose metabo/transport demand reaction |
| MMDASCBR    | $MMb[c] + MMdnp[e] + MMhdusch[c] \rightarrow MMdnp[c] + MM4b[L]$                | 0     | 1000 | 66588.1              | Moose metabo/transport demand reaction |
| MMDASOP1p   | $MMb2z[s] + MMb2c[s] + MMdpy$                                                   |       |      |                      |                                        |

|                   |                                                                                     |       |      |                                                                |                                              |
|-------------------|-------------------------------------------------------------------------------------|-------|------|----------------------------------------------------------------|----------------------------------------------|
| MMDISA724_1       | MMb2[c] + MMh[c] + MMhnd[c] + MMmpentcsu[c] > 2<br>MMb2[c] + MMhnd[c] + MMhndcsu[c] | 0     | 1000 |                                                                | Mouse metabolic/transport demand<br>reaction |
| MMDGAT            | MMRsuatcsu[c] + MMdg_hu[c] > MMco[c] + MMdg_hu[c]                                   | 0     | 1000 | 56473.1                                                        | Mouse metabolic/transport demand<br>reaction |
| MMDGCH3Lr         | MMdg_hu[c] <== MMdg_hu[c]                                                           | -1000 | 1000 | 13350.1 or 67800.1                                             | Mouse metabolic/transport demand<br>reaction |
| MMDGCH3Ls         | MMdg_hu[c] <== MMdg_hu[c]                                                           | -1000 | 1000 |                                                                | Mouse metabolic/transport demand<br>reaction |
| MMDGK1            | MMarp[c] + MMdarp[c] <== MMdyp[c] + MMdyp[c]                                        | -1000 | 1000 |                                                                | Mouse metabolic/transport demand<br>reaction |
| MMDGK2m           | MMdarp[m] + MMdarp[m] <== MMdarp[m] + MMdarp[m]                                     | -1000 | 1000 | 14923.1                                                        | Mouse metabolic/transport demand<br>reaction |
| MMDGNSKm          | MMarp[m] + MMdarp[m] > MMm[c] + MMdarp[m] + MMdarp[m]                               | 0     | 1000 |                                                                | Mouse metabolic/transport demand<br>reaction |
| MMDGNSu           | MMdarp[c] <== MMdarp[c]                                                             | 0     | 1000 | 27369.1 or 27369.2 or 27369.3 or 27369.4 or 27369.5            | Mouse metabolic/transport demand<br>reaction |
| MMDGNSum          | MMdarp[c] <== MMdarp[m]                                                             | -1000 | 1000 |                                                                | Mouse metabolic/transport demand<br>reaction |
| MMDGTPa           | MMdyp[c] <== MMdyp[m]                                                               | -1000 | 1000 |                                                                | Mouse metabolic/transport demand<br>reaction |
| MMDGLIND          | MMh[c] + MMdg_hu[c] <== MMco2[c] + MMhya1c[c]                                       | -1000 | 1000 |                                                                | Mouse metabolic/transport demand<br>reaction |
| MMDHAa1r          | MMhndcsu[c] <== MMhndcsu[c]                                                         | 0     | 1000 |                                                                | Mouse metabolic/transport demand<br>reaction |
| MMDHAPA           | MMdarp[c] + MMRsuatcsu[c] > MMco[c] + MMdarp_hu[c]                                  | 0     | 1000 | 20528.1 or 20527.1 or 20525.1                                  | Mouse metabolic/transport demand<br>reaction |
| MMDHAPAs          | MMRsuatcsu[c] + MMdarp_hu[c] > MMco2[c] + MMdarp_hu[c]                              | 0     | 1000 | 14712.1                                                        | Mouse metabolic/transport demand<br>reaction |
| MMDHCHOLESTANATem | MMhndcsu[em][m] <== MMhndcsu[em][c]                                                 | -1000 | 1000 | 14712.1                                                        | Mouse metabolic/transport demand<br>reaction |
| MMDHCR241r        | MMdarp[m] + MMhndr[m] > MMdarp[m] + MMdarp[m]                                       | 0     | 1000 |                                                                | Mouse metabolic/transport demand<br>reaction |
| MMDHCR24r         | MMhndr[m] + MMhndr[m] > MMdarp[m] + MMhndr[m]                                       | 0     | 1000 | 74754.1                                                        | Mouse metabolic/transport demand<br>reaction |
| MMDHCR24v         | MMhndr[m] + MMhndm[m] > MMhndr[m] + MMhndr[m]                                       | 0     | 1000 | 74754.1                                                        | Mouse metabolic/transport demand<br>reaction |
| MMDHCR1r          | MMh[r] + MMdarp[m] + MMdmsu[m] > MMdarp[m] + MMdarp[m] + MMdmsu[m]                  | 0     | 1000 | 74754.1                                                        | Mouse metabolic/transport demand<br>reaction |
| MMDHCR7r          | MM7dhcsu[m] + MMh[r] + MMdarp[m] > MMdarp[m] + MMhndr[m]                            | 0     | 1000 | 13360.1                                                        | Mouse metabolic/transport demand<br>reaction |
| MMDHCRD1          | MMdarp[c] + MMhndr_hu[c] > MMh[c] + MMdarp[c] + MMern_hu[c]                         | 0     | 1000 | 13360.1                                                        | Mouse metabolic/transport demand<br>reaction |
| MMDHCRD2          | MMhndm_hu[c] + MMhnd[c] > MMern_hu[c] + MMhndh2[c]                                  | 0     | 1000 | 13244.2 or 13244.1                                             | Mouse metabolic/transport demand<br>reaction |
| MMDHDPBM1m        | MMdg_hu[m] + MMdarp[m] > MMh[m] + MMhya1c[m] + MMdg_hu_m[m]                         | 0     | 1000 | 13244.2 or 13244.1                                             | Mouse metabolic/transport demand<br>reaction |
| MMDHAS1LT         | MMdarp[c] + MMdarp[c] > MMh[c] + MMdarp[c] + MMhndcsu[c]                            | 0     | 1000 | 230027.1                                                       | Mouse metabolic/transport demand<br>reaction |
| MMDHASr           | MMdarp[c] <== MMhndcsu[c]                                                           | -1000 | 1000 | 20859.1 or 20860.1                                             | Mouse metabolic/transport demand<br>reaction |
| MMDHFR            | MMhnd[c] <== MMhnd[c]                                                               | -1000 | 1000 |                                                                | Mouse metabolic/transport demand<br>reaction |
| MMDHFR            | MMh[c] + MMdarp[c] + MMhnd[c] <== MMdarp[c] + MMhnd[c]                              | -1000 | 1000 |                                                                | Mouse metabolic/transport demand<br>reaction |
| MMDHFr            | MMhnd[c] <== MMhnd[c]                                                               | -1000 | 1000 | 13361.1                                                        | Mouse metabolic/transport demand<br>reaction |
| MMDHFn            | MMhnd[c] <== MMhnd[c]                                                               | -1000 | 1000 |                                                                | Mouse metabolic/transport demand<br>reaction |
| MMDHORED          | MMh[m] + MMhndcsu[c] > MMh[m] + MMhndcsu[c]                                         | 0     | 1000 |                                                                | Mouse metabolic/transport demand<br>reaction |
| MMDHORTs          | MMh2[c] + MMdhor_S[c] <== MMh[c] + MMharp[c]                                        | -1000 | 1000 | 56749.1                                                        | Mouse metabolic/transport demand<br>reaction |
| MMDHPPM1          | MMh2[c] + MM56darp[c] > MMh[c] + MMhndcsu[c]                                        | 0     | 1000 | 69719.1                                                        | Mouse metabolic/transport demand<br>reaction |
| MMDHPPM2          | MMh2[c] + MM56darp[c] > MMh[c] + MMhndcsu[c]                                        | 0     | 1000 | 22240.1 or 64705.1 or 12934.1                                  | Mouse metabolic/transport demand<br>reaction |
| MMDHPR            | MMh[c] + MMhndcsu[c] + MMhndp[c] > MMhnd[c] + MMhndp[c]                             | 0     | 1000 |                                                                | Mouse metabolic/transport demand<br>reaction |
| MMDHPR2           | MMhndp[c] + MMhndp[c] > MMh[c] + MMhndp[c] + MMhndp[c]                              | 0     | 1000 | 110591.1                                                       | Mouse metabolic/transport demand<br>reaction |
| MMDHPPn           | MMdyp[c] <== MMdyp[m]                                                               | -1000 | 1000 |                                                                | Mouse metabolic/transport demand<br>reaction |
| MMDGALSGALSIDE    | MMdg_hu_hu[c] <== MMdg_hu_hu[c]                                                     | -1000 | 1000 |                                                                | Mouse metabolic/transport demand<br>reaction |
| MMDGALSGALSIDg    | MMdg_hu_hu[c] <== MMdg_hu_hu[c]                                                     | -1000 | 1000 |                                                                | Mouse metabolic/transport demand<br>reaction |
| MMDGALSIDBg       | MMdg_hu_hu[c] <== MMdg_hu_hu[c]                                                     | -1000 | 1000 |                                                                | Mouse metabolic/transport demand<br>reaction |
| MMDGALSIDH        | MMdg_hu_hu[c] <== MMdg_hu_hu[c]                                                     | -1000 | 1000 |                                                                | Mouse metabolic/transport demand<br>reaction |
| MMDIN             | MMdn[c] <== MMdn[c]                                                                 | 0     | 1000 |                                                                | Mouse metabolic/transport demand<br>reaction |
| MMDTPn            | MMdyp[c] <== MMdyp[m]                                                               | -1000 | 1000 |                                                                | Mouse metabolic/transport demand<br>reaction |
| MMDKMPD           | MMb2[c] + MMb2[c] + MMdarp[c] > 2 MMh[c] + MMdyp[c] + MMhndcsu[c] + MMhndcsu[c]     | 0     | 1000 |                                                                | Mouse metabolic/transport demand<br>reaction |
| MMDLNLGGCTP1      | MMdn[c] + MMhndgsu[c] > MMco[c] + MMhndgsu[c]                                       | 0     | 1000 |                                                                | Mouse metabolic/transport demand<br>reaction |
| MMDLNLGGCTP2      | MMco[m] + MMhndgsu[m] > MMern[m] + MMhndgsu[m]                                      | 0     | 1000 | 12895.4 or 12894.1 or 78070.1 or 12895.2 or 12895.3 or 12895.1 | Mouse metabolic/transport demand<br>reaction |
| MMDLNLGGCRN1      | MMhndgsu[c] <== MMhndgsu[m]                                                         | 0     | 1000 | 12896.1                                                        | Mouse metabolic/transport demand<br>reaction |
| MMDLNLGg          | MMhndgsu[c] <== MMhndgsu[c]                                                         | 0     | 1000 | 57279.1                                                        | Mouse metabolic/transport demand<br>reaction |
| MMDMANTYPINRINe   | MMdmantypine[c] <== MMdmantypine[c]                                                 | 0     | 1000 |                                                                | Mouse metabolic/transport demand<br>reaction |
| MMDMATT           | MMdarp[c] + MMdyp[c] > MMdyp[c] + MMdyp[c]                                          | 0     | 1000 |                                                                | Mouse metabolic/transport demand<br>reaction |
| MMDMATTs          | MMdarp[s] + MMdarp[s] > MM                                                          |       |      |                                                                |                                              |

[illegible]

|                 |                                                                                                                                                            |       |      |                                                                                                                                          |                                           |
|-----------------|------------------------------------------------------------------------------------------------------------------------------------------------------------|-------|------|------------------------------------------------------------------------------------------------------------------------------------------|-------------------------------------------|
| MMDOLPP_Ler     | $MMb2z[e] + 0.1 \text{ MMd4dp}_L[Lr] \rightarrow 0.1 \text{ MMd5dp}_L[Lr] + MMb[e] + MMb[e]$                                                               | 0     | 1000 | 2004.1 and 13200.1 and 103963.1 and 13135.1                                                                                              | Mouse metabolic/transport demand reaction |
| MMDOLPP_Uer     | $MMb2z[e] + 0.1 \text{ MMd4dp}_U[Ur] \rightarrow MMb[e] + 0.1 \text{ MMd5dp}_U[Ur] + MMb[e]$                                                               | 0     | 1000 | 57170.1                                                                                                                                  | Mouse metabolic/transport demand reaction |
| MMDOLGLCP_Ler   | $0.1 \text{ MMd4dp}_L[Lr] \rightarrow 0.1 \text{ MMd4dp}_L[Lr]$                                                                                            | 0     | 1000 | 57170.1                                                                                                                                  | Mouse metabolic/transport demand reaction |
| MMDOLGLCP_Uer   | $0.1 \text{ MMd4dp}_U[Ur] \rightarrow 0.1 \text{ MMd4dp}_U[Ur]$                                                                                            | 0     | 1000 |                                                                                                                                          | Mouse metabolic/transport demand reaction |
| MMDOLGPP_Ler    | $MMb2z[e] + 0.1 \text{ MMd4dp}_L[Lr] \rightarrow 0.1 \text{ MMd4dp}_L[Lr] + MMb[e] + MMb[e]$                                                               | 0     | 1000 |                                                                                                                                          | Mouse metabolic/transport demand reaction |
| MMDOLGPP_Uer    | $MMb2z[e] + 0.1 \text{ MMd4dp}_U[Ur] \rightarrow MMb[e] + 0.1 \text{ MMd4dp}_U[Ur] + MMb[e]$                                                               | 0     | 1000 |                                                                                                                                          | Mouse metabolic/transport demand reaction |
| MMDOLCHOL_Ler   | $0.1 \text{ MMd4chol}_L[Lr] \leftrightarrow 0.1 \text{ MMd4chol}_L[Lr]$                                                                                    | -1000 | 1000 |                                                                                                                                          | Mouse metabolic/transport demand reaction |
| MMDOLCHOL_Uer   | $0.1 \text{ MMd4chol}_U[Ur] \leftrightarrow 0.1 \text{ MMd4chol}_U[Ur]$                                                                                    | -1000 | 1000 |                                                                                                                                          | Mouse metabolic/transport demand reaction |
| MMDOLC_L        | $MMd4p[e] + 0.1 \text{ MMd4chol}_L[Lr] \rightarrow MMb[e] + MMd4p[e] + 0.1 \text{ MMd4p}_L[Lr]$                                                            | 0     | 1000 |                                                                                                                                          | Mouse metabolic/transport demand reaction |
| MMDOLC_U        | $MMd4p[e] + 0.1 \text{ MMd4chol}_U[Ur] \rightarrow MMb[e] + MMd4p[e] + 0.1 \text{ MMd4p}_U[Ur]$                                                            | 0     | 1000 |                                                                                                                                          | Mouse metabolic/transport demand reaction |
| MMDOLMANP_Ler   | $0.1 \text{ MMd4dnp}_L[Lr] \rightarrow 0.1 \text{ MMd4dnp}_L[Lr]$                                                                                          | 0     | 1000 |                                                                                                                                          | Mouse metabolic/transport demand reaction |
| MMDOLMANP_Uer   | $0.1 \text{ MMd4dnp}_U[Ur] \rightarrow 0.1 \text{ MMd4dnp}_U[Ur]$                                                                                          | 0     | 1000 |                                                                                                                                          | Mouse metabolic/transport demand reaction |
| MMDOLPGT1_Ler   | $0.1 \text{ MMd4dp}_L[Lr] + 0.1 \text{ MMd4ntrpdp}_L[Lr] \rightarrow 0.1 \text{ MMd4dp}_L[Lr] + MMb[e] + 0.1 \text{ MMd4ntrpdp}_L[Lr]$                     | 0     | 1000 |                                                                                                                                          | Mouse metabolic/transport demand reaction |
| MMDOLPGT1_Uer   | $0.1 \text{ MMd4dp}_U[Ur] + 0.1 \text{ MMd4ntrpdp}_U[Ur] \rightarrow MMb[e] + 0.1 \text{ MMd4dp}_U[Ur] + 0.1 \text{ MMd4ntrpdp}_U[Ur]$                     | 0     | 1000 | 320438.1                                                                                                                                 | Mouse metabolic/transport demand reaction |
| MMDOLPGT2_Ler   | $0.1 \text{ MMd4dp}_L[Lr] + 0.1 \text{ MMd4ntrpdp}_L[Lr] \rightarrow 0.1 \text{ MMd4dp}_L[Lr] + MMb[e] + 0.1 \text{ MMd4ntrpdp}_L[Lr]$                     | 0     | 1000 | 320438.1                                                                                                                                 | Mouse metabolic/transport demand reaction |
| MMDOLPGT2_Uer   | $0.1 \text{ MMd4dp}_U[Ur] + 0.1 \text{ MMd4ntrpdp}_U[Ur] \rightarrow MMb[e] + 0.1 \text{ MMd4dp}_U[Ur] + 0.1 \text{ MMd4ntrpdp}_U[Ur]$                     | 0     | 1000 | 381903.1 or 381903.2 or 381903.3                                                                                                         | Mouse metabolic/transport demand reaction |
| MMDOLPGT3_Ler   | $0.1 \text{ MMd4dp}_L[Lr] + 0.1 \text{ MMd4ntrpdp}_L[Lr] \rightarrow 0.1 \text{ MMd4dp}_L[Lr] + MMb[e] + 0.1 \text{ MMd4ntrpdp}_L[Lr]$                     | 0     | 1000 | 381903.1 or 381903.2 or 381903.3                                                                                                         | Mouse metabolic/transport demand reaction |
| MMDOLPGT3_Uer   | $0.1 \text{ MMd4dp}_U[Ur] + 0.1 \text{ MMd4ntrpdp}_U[Ur] \rightarrow MMb[e] + 0.1 \text{ MMd4dp}_U[Ur] + 0.1 \text{ MMd4ntrpdp}_U[Ur]$                     | 0     | 1000 | 380959.1                                                                                                                                 | Mouse metabolic/transport demand reaction |
| MMDOLPL1_Ler    | $MMb2z[e] + 0.1 \text{ MMd4dp}_L[Lr] \rightarrow MMb[e] + 0.1 \text{ MMd4chol}_L[Lr]$                                                                      | 0     | 1000 | 380959.1                                                                                                                                 | Mouse metabolic/transport demand reaction |
| MMDOLPL1_Uer    | $MMb2z[e] + 0.1 \text{ MMd4dp}_U[Ur] \rightarrow MMb[e] + 0.1 \text{ MMd4chol}_U[Ur]$                                                                      | 0     | 1000 |                                                                                                                                          | Mouse metabolic/transport demand reaction |
| MMDOLPMT1_Ler   | $0.1 \text{ MMd4dnp}_L[Lr] + 0.1 \text{ MMd4ntrpdp}_L[Lr] \rightarrow 0.1 \text{ MMd4dp}_L[Lr] + MMb[e] + 0.1 \text{ MMd4ntrpdp}_L[Lr]$                    | 0     | 1000 |                                                                                                                                          | Mouse metabolic/transport demand reaction |
| MMDOLPMT1_Uer   | $0.1 \text{ MMd4dnp}_U[Ur] + 0.1 \text{ MMd4ntrpdp}_U[Ur] \rightarrow MMb[e] + 0.1 \text{ MMd4dp}_U[Ur] + 0.1 \text{ MMd4ntrpdp}_U[Ur]$                    | 0     | 1000 | 208624.1 or 208624.2 or 208624.3 or 208624.4                                                                                             | Mouse metabolic/transport demand reaction |
| MMDOLPMT2_Ler   | $0.1 \text{ MMd4dnp}_L[Lr] + 0.1 \text{ MMd4ntrpdp}_L[Lr] \rightarrow 0.1 \text{ MMd4dp}_L[Lr] + MMb[e] + 0.1 \text{ MMd4ntrpdp}_L[Lr]$                    | 0     | 1000 | 208624.1 or 208624.2 or 208624.3 or 208624.4                                                                                             | Mouse metabolic/transport demand reaction |
| MMDOLPMT2_Uer   | $0.1 \text{ MMd4dnp}_U[Ur] + 0.1 \text{ MMd4ntrpdp}_U[Ur] \rightarrow MMb[e] + 0.1 \text{ MMd4dp}_U[Ur] + 0.1 \text{ MMd4ntrpdp}_U[Ur]$                    | 0     | 1000 |                                                                                                                                          | Mouse metabolic/transport demand reaction |
| MMDOLPMT3_Ler   | $0.1 \text{ MMd4dnp}_L[Lr] + 0.1 \text{ MMd4ntrpdp}_L[Lr] \rightarrow 0.1 \text{ MMd4dp}_L[Lr] + MMb[e] + 0.1 \text{ MMd4ntrpdp}_L[Lr]$                    | 0     | 1000 |                                                                                                                                          | Mouse metabolic/transport demand reaction |
| MMDOLPMT3_Uer   | $0.1 \text{ MMd4dnp}_U[Ur] + 0.1 \text{ MMd4ntrpdp}_U[Ur] \rightarrow MMb[e] + 0.1 \text{ MMd4dp}_U[Ur] + 0.1 \text{ MMd4ntrpdp}_U[Ur]$                    | 0     | 1000 | 223774.1                                                                                                                                 | Mouse metabolic/transport demand reaction |
| MMDOLPMT4_Ler   | $0.1 \text{ MMd4dnp}_L[Lr] + 0.1 \text{ MMd4ntrpdp}_L[Lr] \rightarrow 0.1 \text{ MMd4dp}_L[Lr] + MMb[e] + 0.1 \text{ MMd4ntrpdp}_L[Lr]$                    | 0     | 1000 | 223774.1                                                                                                                                 | Mouse metabolic/transport demand reaction |
| MMDOLPMT4_Uer   | $0.1 \text{ MMd4dnp}_U[Ur] + 0.1 \text{ MMd4ntrpdp}_U[Ur] \rightarrow MMb[e] + 0.1 \text{ MMd4dp}_U[Ur] + 0.1 \text{ MMd4ntrpdp}_U[Ur]$                    | 0     | 1000 |                                                                                                                                          | Mouse metabolic/transport demand reaction |
| MMDOLPMT_L      | $MMd4p[e] + 0.1 \text{ MMd4dp}_L[Lr] \rightarrow MMd4p[e] + 0.1 \text{ MMd4dnp}_L[Lr]$                                                                     | 0     | 1000 |                                                                                                                                          | Mouse metabolic/transport demand reaction |
| MMDOLPMT_U      | $MMd4p[e] + 0.1 \text{ MMd4dp}_U[Ur] \rightarrow MMd4p[e] + 0.1 \text{ MMd4dnp}_U[Ur]$                                                                     | 0     | 1000 | 68563.1 and 13481.1 and 13480.1 or 68563.2 and 13481.1 and 13480.1 or 13481.2 and 68563.1 and 13480.1 or 13481.2 and 68563.2 and 13480.1 | Mouse metabolic/transport demand reaction |
| MMDOLP_Ler      | $0.1 \text{ MMd4dp}_L[Lr] \rightarrow 0.1 \text{ MMd4dp}_L[Lr]$                                                                                            | 0     | 1000 | 68563.1 and 13481.1 and 13480.1 or 68563.2 and 13481.1 and 13480.1 or 13481.2 and 68563.1 and 13480.1 or 13481.2 and 68563.2 and 13480.1 | Mouse metabolic/transport demand reaction |
| MMDOLP_Uer      | $0.1 \text{ MMd4dp}_U[Ur] \rightarrow 0.1 \text{ MMd4dp}_U[Ur]$                                                                                            | 0     | 1000 |                                                                                                                                          | Mouse metabolic/transport demand reaction |
| MMDOPAIMO       | $MMb2z[e] + MMd4p[e] + MMb2z[e] \rightarrow MMb2z[e] + MMd4p[e] + MMb2z[e]$                                                                                | 0     | 1000 |                                                                                                                                          | Mouse metabolic/transport demand reaction |
| MMDOPACHRMISO   | $MMb2z[e] + 2 \text{ MMd2c23d56dhoai}[e] \rightarrow 2 \text{ MMb2z}[e] + 2 \text{ MMdL}_L[Lr]$                                                            | 0     | 1000 | 5901.2 or 13166.1                                                                                                                        | Mouse metabolic/transport demand reaction |
| MMDOPAMT        | $MMb2z[e] + MMd4p[e] \rightarrow MMb[e] + MMd4p[e] + MMb2z[e]$                                                                                             | 0     | 1000 | 22173.1                                                                                                                                  | Mouse metabolic/transport demand reaction |
| MMDOPAQNISOI    | $MMd4p[e] \leftrightarrow MMb[e] + MMd2c23d56dhoai}[e]$                                                                                                    | -1000 | 1000 | 12846.1 or 12846.2                                                                                                                       | Mouse metabolic/transport demand reaction |
| MMDOPASPI       | $MMd4p[e] \rightarrow MMd4p[e]$                                                                                                                            | 0     | 1000 |                                                                                                                                          | Mouse metabolic/transport demand reaction |
| MMDOPAVESSEC    | $2 \text{ MMb2z}[e] + 2 \text{ MMd4p}[e] + 3 \text{ MMd4p}[e] \rightarrow 2 \text{ MMb2z}[e] + 2 \text{ MMb[e]} + 2 \text{ MMd4p}[e] + 3 \text{ MMd4p}[e]$ | 0     | 1000 |                                                                                                                                          | Mouse metabolic/transport demand reaction |
| MMDOPM4_2_U     | $2 \text{ MMb2z}[e] + MMd4p[e] \leftrightarrow 2 \text{ MMb2z}[e] + MMd4p[e]$                                                                              | 0     | 1000 | 214084.1 or 110877.1                                                                                                                     | Mouse metabolic/transport demand reaction |
| MMDOPAu         | $MMd4p[e] \leftrightarrow MMd4p[e]$                                                                                                                        | 0     | 1000 | 20538.1 or 13162.1                                                                                                                       | Mouse metabolic/transport demand reaction |
| MMDORNOp        | $MMb2z[e] + MMb2z[e] + MMb2z[e] \rightarrow MMb2z[e] + MMb2z[e] + MMb2z[e]$                                                                                | 0     | 1000 | 20518.1 or 20519.1 or 20518.2                                                                                                            | Mouse metabolic/transport demand reaction |
| MMDFCOAK        | $MMd4p[e] + MMd4p[e] \rightarrow 2 \text{ MMd4p}[e] + MMb[e] + MMb2z[e]$                                                                                   | 0     | 1000 | 13142.1                                                                                                                                  | Mouse metabolic/transport demand reaction |
| MMDFCOAP        | $MMb2z[e] + MMd4p[e] \rightarrow 2 \text{ MMd4p}[e] + MMd4p[e] + MMb2z[e]$                                                                                 | 0     | 1000 | 71743.1                                                                                                                                  | Mouse metabolic/transport demand reaction |
| MMDFCOH         | $MMd4p[e] \leftrightarrow MMd4p[e]$                                                                                                                        | -1000 | 1000 |                                                                                                                                          | Mouse metabolic/transport demand reaction |
| MMDFPGM         | $MMb2z[e] \leftrightarrow MMb[e] + MMd2c23d56dhoai}[e]$                                                                                                    | -1000 | 1000 |                                                                                                                                          | Mouse metabolic/transport demand reaction |
| MMDFPGse        | $MMb2z[e] + MMd2c23d56dhoai}[e] \rightarrow MMb[e] + MMd2c23d56dhoai}[e]$                                                                                  | 0     | 1000 | 12183.1 or 56012.1 or 18648.1 or 12183.2 or 56012.2                                                                                      | Mouse metabolic/transport demand reaction |
| MMDFPMBDCu      | $MMb2z[e] + MMd2c23d56dhoai}[e] \rightarrow MMb[e] + MMd2c23d56dhoai}[e]$                                                                                  | 0     | 1000 | 12183.1 or 56012.1 or 18648.1 or 12183.2 or 56012.2                                                                                      | Mouse metabolic/transport demand reaction |
| MMDFPMVds       | $MMd4p[e] + MMd4p[e] \rightarrow MMd4p[e] + MMd4p[e] + MMd4p[e]$                                                                                           | 0     | 1000 |                                                                                                                                          | Mouse metabolic/transport demand reaction |
| MMDFPS          | $7 \text{ MMd4p}[e] + MMd4p[e] \rightarrow 7 \text{ MMd4p}[e] + MMd4p[e]$                                                                                  | 0     | 1000 | 192156.1                                                                                                                                 | Mouse metabolic/transport demand reaction |
| MMDFPROOp       | $MMb2z[e] + MMd4p[e] \rightarrow 2 \text{ MMd4p}[e] + MMb2z[e] + MMd4p[e]$                                                                                 | 0     | 1000 |                                                                                                                                          | Mouse metabolic/transport demand reaction |
| MMDEXIK         | $MMd4p[e] + MMd4p[e] \rightarrow MMd4p[e] + MMd4p[e] + MMd4p[e]$                                                                                           | 0     | 1000 | 13142.1                                                                                                                                  | Mouse metabolic/transport demand reaction |
| MMDEXIR         | $MMd4p[e] \rightarrow MMd4p[e]$                                                                                                                            | -1000 | 1000 | 71336.1                                                                                                                                  | Mouse metabolic/transport demand reaction |
| MMDFPA          | $MMd4p[e] \rightarrow MMd4p[e]$                                                                                                                            | 0     | 1000 |                                                                                                                                          | Mouse metabolic/transport demand reaction |
| MMDSAT          | $MMd4p[e] + MMd4p[e] \rightarrow MMb[e] + MMd4p[e] + MMd4p[e]$                                                                                             | 0     | 1000 |                                                                                                                                          | Mouse metabolic/transport demand reaction |
| MMDIST_ANTIGENi | $MMd4t\_antigen[e] \rightarrow MMd4t\_antigen[e]$                                                                                                          | 0     | 1000 |                                                                                                                                          | Mouse metabolic/transport demand reaction |
| MMDITPn         | $MMd4p[e] \leftrightarrow MMd4p[e]$                                                                                                                        | -1000 | 1000 |                                                                                                                                          | Mouse metabolic/transport demand reaction |
| MMDITMPK        | $MMd4p[e] + MMd4p[e] \leftrightarrow MMd4p[e] + MMd4p[e]$                                                                                                  | -1000 | 1000 |                                                                                                                                          | Mouse metabolic/transport demand reaction |
| MMDITPn         | $MMd4p[e] \leftrightarrow MMd4p[e]$                                                                                                                        | -1000 | 1000 | 21915.1                                                                                                                                  | Mouse metabolic/transport demand reaction |
| MMDUDPn         | $MMd4p[e] \leftrightarrow MMd4p[e]$                                                                                                                        | -1000 | 1000 |                                                                                                                                          | Mouse metabolic/transport demand reaction |
| MMDXMPn         | $MMd4p[e] \leftrightarrow MMd4p[e]$                                                                                                                        | -1000 | 1000 |                                                                                                                                          | Mouse metabolic/transport demand reaction |
| MMDXRAD         | $MMd4p[e] + MMd4p[e] \leftrightarrow MMb[e] + MMd4p[e] + MMd4p[e]$                                                                                         | -1000 | 1000 |                                                                                                                                          | Mouse metabolic/transport demand reaction |
| MMDXRAD2        | $MMd4p[e] + MMd4p[e] \leftrightarrow MMb[e] + MMd4p[e] + MMd4p[e]$                                                                                         | -1000 | 1000 | 99586.1                                                                                                                                  | Mouse metabolic/transport demand reaction |
| MMDXRIK1        | $MMd4p[e] + MMd4p[e] \rightarrow MMd4p[e] + MMd4p[e] + MMd4p[e]$                                                                                           | 0     | 1000 | 99586.1                                                                                                                                  | Mouse metabolic/transport demand reaction |
| MMDXRIK1m       | $MMd4p[e] + MMd4p[e] \rightarrow MMb[e] + MMd4p[e] + MMd4p[e]$                                                                                             | 0     | 1000 | 57813.1 or 619653.1                                                                                                                      | Mouse metabolic/transport demand reaction |
| MMDXRPP         | $MMd4p[e] + MMd4p[e] \leftrightarrow MMd4p[e] + MMd4p[e]$                                                                                                  | -1000 | 1000 | 57813.1                                                                                                                                  | Mouse metabolic/transport demand reaction |
| MMDXURi         | $MMd4p[e] \leftrightarrow MMd4p[e]$                                                                                                                        | 0     | 1000 | 667034.1 or 76654.1                                                                                                                      | Mouse metabolic/transport demand reaction |
| MMDXURm         | $MMd4p[e] \leftrightarrow MMd4p[e]$                                                                                                                        | -1000 | 1000 |                                                                                                                                          | Mouse metabolic/transport demand reaction |
| MMDXUPDPn       | $MMb2z[e] + MMd4p[e] \rightarrow MMb[e] + MMd4p[e] + MMd4p[e]$                                                                                             | 0     | 1000 |                                                                                                                                          | Mouse metabolic/transport demand reaction |
| MMDXUTPPn       | $MMb2z[e] + MMd4p[e] \rightarrow MMd4p[e] + MMd4p[e] + MMd4p[e]$                                                                                           | 0     | 1000 | 110074.1                                                                                                                                 | Mouse metabolic/transport demand reaction |
| MMD_3AIB        | $MMd4p[e] \rightarrow MMd4p[e]$                                                                                                                            | 0     | 1000 | 110074.1                                                                                                                                 | Mouse metabolic/transport demand reaction |
| MMD_LAC2        | $MMb[e] + MMb[e] \rightarrow MMb[e] + MMb[e]$                                                                                                              | 0     | 1000 |                                                                                                                                          | Mouse metabolic/transport demand reaction |
| MMD_LACm        | $MMb[e] + MMb[e] \rightarrow MMb[e] + MMb[e]$                                                                                                              | -1000 | 1000 | 20503.1 or 80879.1 or 20501.1 or 57274.1                                                                                                 | Mouse metabolic/transport demand reaction |
| MMEAFATOXINe    | $MMb2z[e] \leftrightarrow MMb2z[e]$                                                                                                                        | 0     | 1000 | 20501.1                                                                                                                                  | Mouse metabolic/transport demand reaction |
| MMEBASTINEOHs   | $MMb2z[e] \leftrightarrow MMb2z[e]$                                                                                                                        | 0     | 1000 |                                                                                                                                          | Mouse metabolic/transport demand reaction |
| MMEBASTINEOHr   | $MMb2z[e] \leftrightarrow MMb2z[e]$                                                                                                                        | -1000 | 1000 |                                                                                                                                          | Mouse metabolic/transport demand reaction |
| MMEBASTINEb     | $MMb2z[e] \leftrightarrow MMb2z[e]$                                                                                                                        | 0     | 1000 |                                                                                                                                          | Mouse metabolic/transport demand reaction |
| MMEBASTINEr     | $MMb2z[e] \leftrightarrow MMb2z[e]$                                                                                                                        | -1000 | 1000 |                                                                                                                                          | Mouse metabolic/transport demand reaction |
| MMEBP1r         | $MMb2z[e] \rightarrow MMb2z[e]$                                                                                                                            | 0     | 1000 |                                                                                                                                          | Mouse metabolic/transport demand reaction |
| MMEBP2r         | $MMb2z[e] \rightarrow MMb2z[e]$                                                                                                                            | 0     | 1000 | 13595.1                                                                                                                                  | Mouse metabolic/transport demand reaction |
| MMECGISOr       | $MMb2z[e] \leftrightarrow MMb2z[e]$                                                                                                                        | -1000 | 1000 | 13595.1                                                                                                                                  | Mouse metabolic/transport demand reaction |
| MMECOAH12m      | $MMb2z[e] + MMd2c23d56dhoai}[e] \leftrightarrow MMd2c23d56dhoai}[e]$                                                                                       | -1000 | 1000 |                                                                                                                                          | Mouse metabolic/transport demand reaction |
| MMECOAH1m       | $MMd2c23d56dhoai}[e] \leftrightarrow MMb2z[e] + MMd2c23d56dhoai}[e]$                                                                                       | -1000 | 1000 | 231086.1 or 97212.1 or 93747.1                                                                                                           | Mouse metabolic/transport demand reaction |

|                 |                                                                  |       |      |                                                                |                                           |
|-----------------|------------------------------------------------------------------|-------|------|----------------------------------------------------------------|-------------------------------------------|
| MMEOCAH1s       | MMH3co[n] <== MMH2co[n] + MMH2co[n]                              | -1000 | 1000 | 11992.1 or 231086.1 or 97212.1 or 9747.1                       | Moose metabolic/transport demand reaction |
| MMECOAP9n       | MMH2co[n] + MMH2n2co[n] <== MMH3co[n]                            | -1000 | 1000 | 7417.1 or 51798.1                                              | Moose metabolic/transport demand reaction |
| MMEGMEST        | MMH2o[n] + MMegm[er] -> MMHr[n] + MMegm[er] + MMHmso[n]          | 0     | 1000 | 231086.1 or 97212.1 or 9747.1                                  | Moose metabolic/transport demand reaction |
| MMHGLAT         | MMa[n]c + MMH4[n]c <== MMH4[n]c + MMH2o[n]p[c]                   | 0     | 1000 | 67758.1                                                        | Moose metabolic/transport demand reaction |
| MMHGLAT7n       | MMH4h[n]n + MMHm[n] -> MMaP[n] + MMH2o[n]p[n]                    | 0     | 1000 | 14718.1                                                        | Moose metabolic/transport demand reaction |
| MMHGLAT7n       | MMa[n]c + MMH4h[n]n -> MMH4[n]n + MMH2o[n]p[n]                   | 0     | 1000 | 14719.1                                                        | Moose metabolic/transport demand reaction |
| MMECOSTETCP7t   | MMm[n]c + MMHmco[n]c <== MMH2o[n]c + MMHmco[n]c                  | 0     | 1000 | 14719.1                                                        | Moose metabolic/transport demand reaction |
| MMECOSTETCP2T   | MMHco[n] + MMHmco[n]c <== MMHm[n] + MMHmco[n]c                   | 0     | 1000 | 12895.4 or 12894.1 or 78070.1 or 12895.2 or 12895.3 or 12895.1 | Moose metabolic/transport demand reaction |
| MMECOSTETCR8n   | MMHmco[n]c <== MMHmco[n]c                                        | 0     | 1000 | 12896.1                                                        | Moose metabolic/transport demand reaction |
| MMECOSTET       | MMHmco[n]c <== MMHmco[n]c                                        | 0     | 1000 | 57279.1                                                        | Moose metabolic/transport demand reaction |
| MMELADPT7t      | MMm[n]c + MMH2o[n]c <== MMH2o[n]c + MMHm[n]c                     | -1000 | 1000 |                                                                | Moose metabolic/transport demand reaction |
| MMELADPT2       | MMHco[n] + MMHm[n]c <== MMHm[n] + MMH2o[n]n                      | 0     | 1000 | 12895.4 or 12894.1 or 78070.1 or 12895.2 or 12895.3 or 12895.1 | Moose metabolic/transport demand reaction |
| MMELADCR8n      | MMHm[n]c <== MMHm[n]c                                            | 0     | 1000 | 12896.1                                                        | Moose metabolic/transport demand reaction |
| MMELAD8         | MMHm[n]c <== MMHm[n]c                                            | 0     | 1000 | 57279.1                                                        | Moose metabolic/transport demand reaction |
| MMENGA5E        | MMH2o[n] + MMH2D2n2n[n]c <== MMHm[n]c + MMH2D2n2n[n]c            | 0     | 1000 |                                                                | Moose metabolic/transport demand reaction |
| MMENGA5E2       | MMH2o[n] + MMH2n2n[n]c <== MMHm[n]c + MMH2n2n[n]c                | 0     | 1000 | 217364.1                                                       | Moose metabolic/transport demand reaction |
| MMENGA5E2b      | MMH2o[n] + MMH2n2n[n]c <== MMHm[n]c + MMH2n2n[n]c                | 0     | 1000 | 217364.1                                                       | Moose metabolic/transport demand reaction |
| MMENGA5E3       | MMH2o[n] + MMHs_deg[n] <== MMHm[n]c + MMHs_deg[n]                | 0     | 1000 |                                                                | Moose metabolic/transport demand reaction |
| MMENGA5E5       | MMH2o[n] + MMH2D2n2n[n]c <== MMHm[n]c + MMH2D2n2n[n]c            | 0     | 1000 |                                                                | Moose metabolic/transport demand reaction |
| MMENMAN1g       | MMH2o[n] + MMHm[n]mso[n] -> MMHm[n]mso[n]                        | 0     | 1000 |                                                                | Moose metabolic/transport demand reaction |
| MMENMAN2g       | MMH2o[n] + MMH2n2n[n]c <== MMHm[n]mso[n] + MMH2n2n[n]c           | 0     | 1000 |                                                                | Moose metabolic/transport demand reaction |
| MMENMAN3g       | MMH2o[n] + MMH2n2n[n]c <== MMHm[n]mso[n] + MMH2n2n[n]c           | 0     | 1000 |                                                                | Moose metabolic/transport demand reaction |
| MMENMAN4g       | MMH2o[n] + MMHm[n]mso[n]c <== MMHm[n]mso[n]                      | 0     | 1000 |                                                                | Moose metabolic/transport demand reaction |
| MMENMAN5g       | MMH2o[n] + MMHm[n]mso[n]c <== MMHm[n]mso[n]                      | 0     | 1000 |                                                                | Moose metabolic/transport demand reaction |
| MMENMAN6g       | MMH2o[n] + MMHm[n]mso[n]c <== MMHm[n]mso[n]                      | 0     | 1000 |                                                                | Moose metabolic/transport demand reaction |
| MMENO           | MMH2g[n]c <== MMH2o[n]c + MMHm[n]c                               | -1000 | 1000 |                                                                | Moose metabolic/transport demand reaction |
| MMEPAPABP9n     | MMHm[n]c <== MMHm[n]c                                            | 0     | 1000 | 13807.1 or 13808.1 or 13808.2 or 13806.1                       | Moose metabolic/transport demand reaction |
| MMEPCTX         | MMH[n]c + MMHm[n]c + MMH2n2n[n]c <== MMHm[n]c + MMH2n2n[n]c      | 0     | 1000 | (4470.1 or 12491.1)                                            | Moose metabolic/transport demand reaction |
| MMESTRADIOGLC2  | MMH2o[n] + MMa[n]c + MMHm[n]c <== MMHm[n]c + MMH2o[n] + MMHm[n]c | 0     | 1000 | 68671.1                                                        | Moose metabolic/transport demand reaction |
| MMESTRADIOGLC4r | MMHm[n]c <== MMHm[n]c                                            | -1000 | 1000 | 239273.1                                                       | Moose metabolic/transport demand reaction |
| MMESTRADIO4r    | MMHm[n]c <== MMHm[n]c                                            | 0     | 1000 |                                                                | Moose metabolic/transport demand reaction |
| MMESTRADIO4r    | MMHm[n]c <== MMHm[n]c                                            | -1000 | 1000 |                                                                | Moose metabolic/transport demand reaction |
| MMESTRADIOGLC6  | MMH2o[n] + MMa[n]c + MMHm[n]c <== MMHm[n]c + MMH2o[n] + MMHm[n]c | 0     | 1000 |                                                                | Moose metabolic/transport demand reaction |
| MMESTRADIOGLC7r | MMHm[n]c <== MMHm[n]c                                            | -1000 | 1000 | 17250.1                                                        | Moose metabolic/transport demand reaction |
| MMESTRADIO4r    | MMHm[n]c <== MMHm[n]c                                            | -1000 | 1000 |                                                                | Moose metabolic/transport demand reaction |
| MMESTRADIOGLC3  | MMH2o[n] + MMa[n]c + MMHm[n]c <== MMHm[n]c + MMH2o[n] + MMHm[n]c | 0     | 1000 |                                                                | Moose metabolic/transport demand reaction |
| MMESTRADIOGLC4r | MMHm[n]c <== MMHm[n]c                                            | -1000 | 1000 | 76408.1 or 76408.2 or 76408.3                                  | Moose metabolic/transport demand reaction |
| MMESTRONES2     | 2 MMHm[n]c + MMHm[n]c <== 2 MMHm[n]c + MMHm[n]c                  | 0     | 1000 |                                                                | Moose metabolic/transport demand reaction |
| MMESTRONER      | MMHm[n]c <== MMHm[n]c                                            | -1000 | 1000 | 20493.1                                                        | Moose metabolic/transport demand reaction |
| MMESTSULT       | MMHm[n]c + MMHm[n]c <== MMHm[n]c + MMHm[n]c                      | 0     | 1000 |                                                                | Moose metabolic/transport demand reaction |
| MMETP           | MMHm[n]c + MMHm[n]c <== MMHm[n]c + MMHm[n]c                      | 0     | 1000 | 20887.1 or 20887.2 or 20887.3 or 20887.4 or 20860.1 or 20887.5 | Moose metabolic/transport demand reaction |
| MMETPQO         | MMHm[n]c + MMHm[n]c <== MMHm[n]c + MMHm[n]c                      | 0     | 1000 | 110826.1 or 110826.2 or 110842.1                               | Moose metabolic/transport demand reaction |
| MMETHAK         | MMHm[n]c + MMHm[n]c <== MMHm[n]c + MMHm[n]c                      | 0     | 1000 | 68641.1                                                        | Moose metabolic/transport demand reaction |
| MMETHAr         | MMHm[n]c <== MMHm[n]c                                            | 0     | 1000 | 214253.1 or 12660.1 or 75320.1 or 12660.2                      | Moose metabolic/transport demand reaction |
| MMETHP          | MMHm[n]c + MMHm[n]c <== MMHm[n]c + MMHm[n]c                      | 0     | 1000 |                                                                | Moose metabolic/transport demand reaction |
| MMETHORNO       | MMHm[n]c + MMHm[n]c <== MMHm[n]c + MMHm[n]c                      | 0     | 1000 | 237928.1                                                       | Moose metabolic/                          |

[illegible]

[illegible]

[illegible]







|                |                                                                                                                |       |      |                                                      |                                              |
|----------------|----------------------------------------------------------------------------------------------------------------|-------|------|------------------------------------------------------|----------------------------------------------|
| MMGLUPRT       | $MMb2o[c] + MMppp[c] + MMgho-Lic \rightarrow MMgho-Lic + MMmpc[c] + MMgme[c]$                                  | 0     | 1000 | 216456.1 or 14660.1 or 216456.2                      | Mouse metabolic/transport demand<br>reaction |
| MMGLUTCOADhm   | $MMb[n] + MMgho-coa[n] + MMfad[n] \rightarrow MMco2[n] + MMb2o-coa[n] + MMfad2[n]$                             | 0     | 1000 | 231327.1                                             | Mouse metabolic/transport demand<br>reaction |
| MMGLU2m        | $MMb[c] + MMgho-Lic \rightleftharpoons MMb[n] + MMgho-Lin$                                                     | -1000 | 1000 | 270076.1 or 270076.2                                 | Mouse metabolic/transport demand<br>reaction |
| MMGLU36        | $MMb[c] + 3 MMma1[c] + MMb[c] + MMgho-Lic \rightarrow MMb[c] + 3 MMma1[c] + MMgho-Lic + MMb[c]$                | 0     | 1000 | 71803.1 or 68267.1 or 78830.1 or 50799.1             | Mouse metabolic/transport demand<br>reaction |
| MMGLU7l        | $MMgho-Lil \rightarrow MMgho-Lic$                                                                              | 0     | 1000 | 242607.1 or 20511.1 or 20513.1 or 20510.1 or 20512.1 | Mouse metabolic/transport demand<br>reaction |
| MMGLUw         | $MMgho-Lic \rightleftharpoons MMgho-Lil$                                                                       | -1000 | 1000 |                                                      | Mouse metabolic/transport demand<br>reaction |
| MMGLXO2p       | $MMb2[s] + MMb2o[s] + MMgac \rightarrow MMb[c] + MMb2o2[s] + MMmaol$                                           | 0     | 1000 |                                                      | Mouse metabolic/transport demand<br>reaction |
| MMGLXm         | $MMgho[c] \rightleftharpoons MMgho[n]$                                                                         | -1000 | 1000 | 15112.1 or 56185.1 or 56185.2                        | Mouse metabolic/transport demand<br>reaction |
| MMGLXp         | $MMgho[c] \rightleftharpoons MMgho[s]$                                                                         | -1000 | 1000 |                                                      | Mouse metabolic/transport demand<br>reaction |
| MMGLYAMDTrc    | $MMgho[c] + MMarg-Lic \rightleftharpoons MMarg[c] + MMgadc[c]$                                                 | -1000 | 1000 |                                                      | Mouse metabolic/transport demand<br>reaction |
| MMGLYATB0c     | $2 MMma1[n] + MMb[n] + MMgho[n] \rightarrow 2 MMma1[c] + MMb[c] + MMb[n]$                                      | 0     | 1000 | 67092.1                                              | Mouse metabolic/transport demand<br>reaction |
| MMGLYATn       | $MMacco[n] + MMgho[n] \rightleftharpoons MMcco[n] + MMZacob[n]$                                                | -1000 | 1000 | 56774.1                                              | Mouse metabolic/transport demand<br>reaction |
| MMGLYB1ATic    | $MMma[n] + MMgho[n] \rightarrow MMma[c] + MMgho[c]$                                                            | 0     | 1000 | 26912.1                                              | Mouse metabolic/transport demand<br>reaction |
| MMGLYB4_2_r    | $2 MMma1[c] + MMgho[c] \rightleftharpoons 2 MMma1[c] + MMgho[c]$                                               | 0     | 1000 | (7008.1 or 74338.1 and 57394.1)                      | Mouse metabolic/transport demand<br>reaction |
| MMGLYBm        | $MMgho[n] \rightleftharpoons MMgho[c]$                                                                         | -1000 | 1000 | 14411.1                                              | Mouse metabolic/transport demand<br>reaction |
| MMGLYCY3pm     | $MMgho3p[c] \rightarrow MMgho3p[n]$                                                                            | 0     | 1000 |                                                      | Mouse metabolic/transport demand<br>reaction |
| MMGLYCK2       | $MMmap[c] + MMgho-Ric \rightarrow MMadc[c] + MMb[c] + MM2pdc[c]$                                               | 0     | 1000 |                                                      | Mouse metabolic/transport demand<br>reaction |
| MMGLYCLTDy     | $MMb[c] + MMmaup[c] + MMgho[c] \rightarrow MMmaup[c] + MMgho[c]$                                               | 0     | 1000 |                                                      | Mouse metabolic/transport demand<br>reaction |
| MMGLYCLTDm     | $MMb[n] + MMmaup[n] + MMgho[n] \rightarrow MMmaup[n] + MMgho[n]$                                               | 0     | 1000 | 76238.1                                              | Mouse metabolic/transport demand<br>reaction |
| MMGLYCL7ip     | $MMgho[c] \rightarrow MMgho[c]$                                                                                | 0     | 1000 |                                                      | Mouse metabolic/transport demand<br>reaction |
| MMGLYCTO1p     | $MMb2[s] + MMgho[s] \rightarrow MMb2o2[s] + MMgho[s]$                                                          | 0     | 1000 |                                                      | Mouse metabolic/transport demand<br>reaction |
| MMGLYC_Si      | $MMgho-Sic \rightarrow MMgho-Sle$                                                                              | 0     | 1000 | 15112.1 or 56185.1 or 56185.2                        | Mouse metabolic/transport demand<br>reaction |
| MMGLYCY        | $MMgho[c] \rightleftharpoons MMgho[c]$                                                                         | -1000 | 0    |                                                      | Mouse metabolic/transport demand<br>reaction |
| MMGLYcm        | $MMgho[c] \rightleftharpoons MMgho[n]$                                                                         | -1000 | 1000 |                                                      | Mouse metabolic/transport demand<br>reaction |
| MMGLYGLYCNc    | $MMb2o[c] + MMgho[c] \rightleftharpoons 2 MMgho[c]$                                                            | -1000 | 1000 |                                                      | Mouse metabolic/transport demand<br>reaction |
| MMGLYGLYPEPT1c | $MMgho[n] \rightarrow MMb[c] + MMgho[c]$                                                                       | 0     | 1000 | (338403.1 or 66054.1)                                | Mouse metabolic/transport demand<br>reaction |
| MMGLYGYi       | $MMb[c] + MMgho[c] \rightleftharpoons MMb[c] + MMgho[c]$                                                       | -1000 | 1000 | 215335.1                                             | Mouse metabolic/transport demand<br>reaction |
| MMGLYK         | $MMmap[c] + MMgho[c] \rightarrow MMmap[c] + MMb[c] + MMgho3p[c]$                                               | 0     | 1000 |                                                      | Mouse metabolic/transport demand<br>reaction |
| MMGLYKm        | $MMmap[n] + MMgho[n] \rightarrow MMma[n] + MMgho3p[n]$                                                         | 0     | 1000 | 14933.1 or 14933.2 or 14626.1                        | Mouse metabolic/transport demand<br>reaction |
| MMGLYLEUHYDR0c | $MMb2o[c] + MMgho[c] \rightleftharpoons MMma-Lic + MMb[c]$                                                     | -1000 | 1000 | 14933.1 or 14933.2 or 14626.1                        | Mouse metabolic/transport demand<br>reaction |
| MMGLYLEPEPT1c  | $MMb[n] + MMgho[n] \rightarrow MMb[c] + MMgho[c]$                                                              | 0     | 1000 | (13479.1 or 66054.1)                                 | Mouse metabolic/transport demand<br>reaction |
| MMGLYLOX       | $MMb2o[c] + MMip-Sic \rightarrow MMb[c] + MMgma[c] + MMma-Lic$                                                 | 0     | 1000 | 215335.1                                             | Mouse metabolic/transport demand<br>reaction |
| MMGLYOXm       | $MMb2o[n] + MMip-Sic \rightarrow MMb[n] + MMma-Lic + MMma[n]$                                                  | 0     | 1000 | 14651.1 or 68977.2 or 68977.1                        | Mouse metabolic/transport demand<br>reaction |
| MMGLYOp        | $MMb2o[s] + MMb2o[s] + MMgho[s] \rightarrow MMb2o2[s] + MMgho[s] + MMb2o[s]$                                   | 0     | 1000 | 14651.1                                              | Mouse metabolic/transport demand<br>reaction |
| MMGLYPATc      | $MMb[n] + MMgho[n] \rightarrow MMb[c] + MMgho[c]$                                                              | 0     | 1000 |                                                      | Mouse metabolic/transport demand<br>reaction |
| MMGLYPEPEPT1c  | $MMb[n] + MMgho[n] \rightarrow MMb[c] + MMgho[c]$                                                              | 0     | 1000 | 215335.1                                             | Mouse metabolic/transport demand<br>reaction |
| MMGLYPHEi      | $MMb[c] + MMgho[c] \rightleftharpoons MMb[c] + MMgho[c]$                                                       | -1000 | 1000 | 215335.1                                             | Mouse metabolic/transport demand<br>reaction |
| MMGLYPROPEPT1c | $MMb[n] + MMgho[n] \rightarrow MMb[c] + MMgho[c]$                                                              | 0     | 1000 |                                                      | Mouse metabolic/transport demand<br>reaction |
| MMGLYPROPR0c   | $MMb2o[c] + MMgho[c] \rightleftharpoons MMgho[c] + MMpro-Lic$                                                  | -1000 | 1000 | 215335.1                                             | Mouse metabolic/transport demand<br>reaction |
| MMGLYSARCnc    | $MMb2o[c] + MMgho[sic] \rightarrow MMgho[c] + MMmao[c]$                                                        | -1000 | 1000 | 18624.1                                              | Mouse metabolic/transport demand<br>reaction |
| MMGLYSARPEPT1c | $MMb[n] + MMgho[n] \rightarrow MMb[c] + MMgho[n]$                                                              | 0     | 1000 | 12751.1                                              | Mouse metabolic/transport demand<br>reaction |
| MMGLYSARi      | $MMb[c] + MMgho[sic] \rightleftharpoons MMb[c] + MMgho[sic]$                                                   | -1000 | 1000 | 215335.1                                             | Mouse metabolic/transport demand<br>reaction |
| MMGLYSNA7nc    | $MMb[c] + MMma1[n] + MMgho[n] \rightleftharpoons MMma1[c] + MMb[n] + MMgho[c]$                                 | -1000 | 1000 |                                                      | Mouse metabolic/transport demand<br>reaction |
| MMGLYV1SSEC    | $MMb2o[c] + MMmap[c] + 3 MMb[c] \rightarrow MMmap[c] + MMb[c] + MMb[c] + 3 MMb[c]$                             | 0     | 1000 | 209837.1                                             | Mouse metabolic/transport demand<br>reaction |
| MMGLYc2        | $MMb[c] + MMgho[c] \rightleftharpoons MMb[c] + MMgho[c]$                                                       | 0     | 1000 | 22348.1                                              | Mouse metabolic/transport demand<br>reaction |
| MMGLYc4        | $MMb[n] + MMgho[n] \rightleftharpoons MMb[c] + MMgho[c]$                                                       | -1000 | 1000 | 215335.1                                             | Mouse metabolic/transport demand<br>reaction |
| MMGLYyL        | $MMma1[c] + MMgho[c] \rightarrow MMma1[c] + MMgho[c]$                                                          | 0     | 1000 | 215335.1                                             | Mouse metabolic/transport demand<br>reaction |
| MMGLY7_211_r   | $2 MMma1[c] + MMgho[c] + MMb[c] \rightleftharpoons 2 MMma1[c] + MMb[c] + MMb[c]$                               | 0     | 1000 | 105727.1 or 67760.1 or 69354.1 or 56774.1            | Mouse metabolic/transport demand<br>reaction |
| MMGLY7_211_r   | $3 MMma1[c] + MMgho[c] + MMb[c] \rightleftharpoons 3 MMma1[c] + MMb[c] + MMb[c]$                               | 0     | 1000 | 14664.1 or 14664.2                                   | Mouse metabolic/transport demand<br>reaction |
| MMGLYm         | $MMgho[c] \rightleftharpoons MMgho[n]$                                                                         | -1000 | 1000 | 104245.1                                             | Mouse metabolic/transport demand<br>reaction |
| MMGLYp         | $MMgho[c] \rightleftharpoons MMgho[s]$                                                                         | -1000 | 1000 |                                                      | Mouse metabolic/transport demand<br>reaction |
| MMGMAND        | $MMgma[nic] \rightarrow MMb2o[c] + MMgmdma[nic]$                                                               | 0     | 1000 |                                                      | Mouse metabolic/transport demand<br>reaction |
| MMGMFR         | $2 MMb[c] + MMmaup[c] + MMppp[c] \rightarrow MMb[c] + MMmaup[c] + MMmpc[c]$                                    | 0     | 1000 | 218138.1                                             | Mouse metabolic/transport demand<br>reaction |
| MMGMP52        | $MMb2o[c] + MMmap[c] + MMgho-Lic + MMmpc[c] \rightarrow 2 MMb[c] + MMgho-Lic + MMmap[c] + MMppp[c] + MMmpc[c]$ | 0     | 1000 | 105446.1 or 105446.2 or 105446.3 or 66355.1          | Mouse metabolic/transport demand<br>reaction |
| MMGMPg         | $MMgmp[c] \rightleftharpoons MMgmp[g]$                                                                         | -1000 | 1000 | 229363.1                                             | Mouse metabolic/transport demand<br>reaction |
| MMGMPu         | $MMgmp[c] \rightleftharpoons MMgmp[n]$                                                                         | -1000 | 1000 |                                                      | Mouse metabolic/transport demand<br>reaction |
| MMGNCOREi      | $MMgncore[g] \rightarrow MMgncore[e]$                                                                          | 0     | 1000 |                                                      | Mouse metabolic/transport demand<br>reaction |
| MMGNCORE2i     | $MMgncore2[g] \rightarrow MMgncore2[e]$                                                                        | 0     | 1000 |                                                      | Mouse metabolic/transport demand<br>reaction |
| MMGNd          | $MMmap[c] + MMppp[c] \rightarrow MMmaup[c] + MMco2[c] + MMndp-Dic$                                             | 0     | 1000 |                                                      | Mouse metabolic/transport demand<br>reaction |
| MMGNdw         | $MMmap[r] + MMppp[r] \rightarrow MMmaup[r] + MMco2[r] + MMndp-Dic$                                             | 0     | 1000 | 110208.1                                             | Mouse metabolic/transport demand<br>reaction |
| MMGNMT         | $MMma[nic] + MMb[c] \rightarrow MMb[c] + MMma[nic] + MMmao[c]$                                                 | 0     | 1000 |                                                      | Mouse metabolic/transport demand<br>reaction |
| MMGPICALPha    | $MMgplcalpha_hic \rightleftharpoons MMgplcalpha_hic$                                                           | -1000 | 1000 | 14711.1                                              | Mouse metabolic/transport demand<br>reaction |
| MMGPICALPhag   | $MMgplcalpha_hic \rightleftharpoons MMgplcalpha_hic$                                                           | -1000 | 1000 |                                                      | Mouse metabolic/transport demand<br>reaction |
| MMGPICe        | $MMgplc_hic \rightleftharpoons MMgplc_hic$                                                                     | -1000 | 1000 |                                                      | Mouse metabolic/transport demand<br>reaction |
| MMGPICy        | $MMgplc_hic \rightleftharpoons MMgplc_hic$                                                                     | -1000 | 1000 |                                                      | Mouse metabolic/transport demand<br>reaction |
| MMGPAM_h       | $MMBrotacal[c] + MMgho3p[c] \rightarrow MMcco[c] + MMgho_hic$                                                  | 0     | 1000 |                                                      | Mouse metabolic/transport demand<br>reaction |
| MMGPAM_h       | $MMBrotacal[n] + MMgho3p[n] \rightarrow MMcco[n] + MMgho_hic$                                                  | 0     | 1000 | 14732.1                                              | Mouse metabolic/transport demand<br>reaction |
| MMGPDDAI       | $MMb2o[c] + MMgpp[c] \rightarrow MMb[c] + MMcho[c] + MMgho3p[c]$                                               | 0     | 1000 | 14732.1                                              | Mouse metabolic/transport demand<br>reaction |
| MMGPAT         | $MMgual_hic + MMgmao[c] \rightarrow MMcco[c] + MMgual_hic$                                                     | 0     | 1000 |                                                      | Mouse metabolic/transport demand<br>reaction |
| MMGPDA2r       | $MMb2o[r] + MMm2enzapal_prot_hic \rightarrow MMb[r] + MMm2enzapal_prot_hic + MMm2enzapal_prot_hic$             | 0     | 1000 | 70325.1                                              | Mouse metabolic/transport demand<br>reaction |
| MMGPDAr        | $MMb2o[r] + MMgpp_prot_hic \rightarrow MMb[r] + MMgpp_prot_hic + MMm2enzapal_prot_hic$                         | 0     | 1000 | 241062.1                                             | Mouse metabolic/transport demand<br>reaction |
| MMGPMTr_L      | $0.1 MMdohung_Lil + MMgppal_hic \rightarrow 0.1 MMdoh_Lil + MMgppal_hic$                                       | 0     | 1000 | 241062.1                                             | Mouse metabolic/transport demand<br>reaction |
| MMGPMTr_U      | $0.1 MMdohung_Uil + MMgppal_hic \rightarrow MMb[c] + 0.1 MMdoh_Lil + MMgppal_hic$                              | 0     | 1000 | 67556.1 or 72084.1                                   | Mouse metabolic/transport demand<br>reaction |
| MMQ1BALPHa     | $MMgplbalpha_hic \rightleftharpoons MMgplbalpha_hic$                                                           | -1000 | 1000 | 67556.1 or 72084.1                                   | Mouse metabolic/transport demand<br>reaction |
| MMQ1BALPHag    | $MMgplbalpha_hic \rightleftharpoons MMgplbalpha_hic$                                                           | -1000 | 1000 |                                                      | Mouse metabolic/transport demand<br>reaction |
| MMQ1Bb         | $MMgplb_hic \rightleftharpoons MMgplb_hic$                                                                     | -1000 | 1000 |                                                      | Mouse metabolic/transport demand<br>reaction |
| MMQ1Bb         | $MMgplb_hic \rightleftharpoons MMgplb_hic$                                                                     | -1000 | 1000 |                                                      | Mouse metabolic/transport demand<br>reaction |
| MMGRTT         | $MMgpp[c] + MMgpp[c] \rightarrow MMgpp[c] + MMb2p[c]$                                                          | 0     | 1000 |                                                      | Mouse metabolic/transport demand<br>reaction |
| MMGRTx         | $MMgpp[c] + MMgpp[c] \rightarrow MMgpp[c] + MMb2p[c]$                                                          | 0     | 1000 | 14593.1                                              | Mouse metabolic/transport demand<br>reaction |
| MMGSNKm        | $MMmap[n] + MMgma[n] \rightarrow MMb[n] + MMma[n] + MMgma[n]$                                                  | 0     | 1000 | 110196.1                                             | Mouse metabolic/transport demand<br>reaction |
| MMGSn          | $MMgma[n] \rightleftharpoons MMgma[n]$                                                                         | 0     | 1000 |                                                      | Mouse metabolic/transport demand<br>reaction |
| MMGSN4         | $MMma1[c] + MMgma[c] \rightarrow MMma1[c] + MMgma[c]$                                                          | 0     | 1000 | 13340.1 or 63959.1                                   | Mouse metabolic/transport demand<br>reaction |
| MMGSN5         | $2 MMma1[c] + MMgma[c] \rightarrow 2 MMma1[c] + MMgma[c]$                                                      | 0     | 1000 | 114304.1 or 269346.1                                 | Mouse metabolic/transport demand<br>reaction |
| MMGSN6         | $MMgma[n] \rightleftharpoons MMgma[n]$                                                                         | -1000 | 1000 | 114304.1                                             | Mouse metabolic/transport demand<br>reaction |

|              |                                                                    |       |      |                                                                                                                                                                          |                                              |
|--------------|--------------------------------------------------------------------|-------|------|--------------------------------------------------------------------------------------------------------------------------------------------------------------------------|----------------------------------------------|
| MMGNSm       | MMg[a]c <=> MMg[a]n                                                | -1000 | 1000 | 71279.1                                                                                                                                                                  | Mouse metabolic/transport demand<br>reaction |
| MMGT1Au      | MMg1a_h[a]c <=> MMg1a_h[a]                                         | -1000 | 1000 | 63959.1                                                                                                                                                                  | Mouse metabolic/transport demand<br>reaction |
| MMGT1Ag      | MMg1a_h[a]c <=> MMg1a_h[a]                                         | -1000 | 1000 |                                                                                                                                                                          | Mouse metabolic/transport demand<br>reaction |
| MMGTHHb      | MMh4hac[h]c + 2 MMgthn[c] -> MMhac-L[c] + MMgthn[c]                | 0     | 1000 |                                                                                                                                                                          | Mouse metabolic/transport demand<br>reaction |
| MMGTHO       | MMh[c] + MMnadh[c]c <=> MMgthn[c] -> MMnadh[c] + 2 MMh[c]          | 0     | 1000 |                                                                                                                                                                          | Mouse metabolic/transport demand<br>reaction |
| MMGTHbm      | MMh[n] + MMnadh[n] + MMgthn[n] -> MMnadh[n] + 2 MMh[n]             | 0     | 1000 | 14782.1                                                                                                                                                                  | Mouse metabolic/transport demand<br>reaction |
| MMGTHP       | MMh2o2[c] + 2 MMgthn[c] <=> 2 MMh2o[c] + MMgthn[c]                 | -1000 | 1000 | 14782.1                                                                                                                                                                  | Mouse metabolic/transport demand<br>reaction |
| MMGTHPs      | 2 MMgthn[c] + MMh2o2[c] <=> 2 MMh2o[c] + MMgthn[c]                 | -1000 | 1000 | 14776.1 or 14775.1 or 18477.1 or 21672.1 or 21672.2 or 18477.2 or 625249.1 or 18477.3 or 14775.2 or 21672.3                                                              | Mouse metabolic/transport demand<br>reaction |
| MMGTHPn      | MMh2o2[n] + 2 MMgthn[n] <=> 2 MMh2o[n] + MMgthn[n]                 | -1000 | 1000 | 75512.1 or 14778.1                                                                                                                                                       | Mouse metabolic/transport demand<br>reaction |
| MMGTHRD      | MMh2o[c] + MMh[c] + MMgthn[c] <=> MMh[c] + MMh[c] + MMgthn[c]      | -1000 | 1000 | 625249.1 or 11757.1 or 11757.2                                                                                                                                           | Mouse metabolic/transport demand<br>reaction |
| MMGTHRDr     | MMgthn[c] <=> MMgthn[r]                                            | -1000 | 1000 |                                                                                                                                                                          | Mouse metabolic/transport demand<br>reaction |
| MMGTHS       | MMh[c] + MMgthn[c] + MMgthn[c] <=> MMh[c] + MMh[c] + MMgthn[c]     | 0     | 1000 |                                                                                                                                                                          | Mouse metabolic/transport demand<br>reaction |
| MMGTMLe      | MMh-L[c] + MMgthn[c] -> MMgthn[c] + MMh-L[c]                       | 0     | 1000 | 14854.1                                                                                                                                                                  | Mouse metabolic/transport demand<br>reaction |
| MMGTPL       | MMh2o[c] + MMgthn[c] -> MMh[c] + MMh[c] + MMh2o[c]                 | 0     | 1000 | 14598.1 or 14598.2 or 14598.3                                                                                                                                            | Mouse metabolic/transport demand<br>reaction |
| MMGTPLb      | MMh2o[a] + MMgthn[a] -> MMh[c] + MMh[c] + MMh2o[a]                 | 0     | 1000 | 14528.1                                                                                                                                                                  | Mouse metabolic/transport demand<br>reaction |
| MMGTPLn      | MMgthn[c] <=> MMgthn[n]                                            | -1000 | 1000 | 14528.1                                                                                                                                                                  | Mouse metabolic/transport demand<br>reaction |
| MMGUCYC      | MMgthn[c] -> MM35c-gpp[c] + MMgthn[c]                              | 0     | 1000 |                                                                                                                                                                          | Mouse metabolic/transport demand<br>reaction |
| MMGUAD       | MMh2o[c] + MMh[c] + MMgthn[c] -> MMh2o[c] + MMh2o[c]               | 0     | 1000 | (230103.1 or 60596.1 and 239134.1) or 234889.1 and 239134.1 or 14917.1 or (54195.1 and 234889.1) or 14919.1 or 230103.2 or 245680.1 or 18160.1 or (54195.1 and 60596.1)) | Mouse metabolic/transport demand<br>reaction |
| MMGUAPRT     | MMgthn[c] + MMgthn[c] -> MMgthn[c] + MMgthn[c]                     | 0     | 1000 | 14544.1                                                                                                                                                                  | Mouse metabolic/transport demand<br>reaction |
| MMGUa        | MMgthn[c] <=> MMgthn[c]                                            | 0     | 1000 | 15452.1                                                                                                                                                                  | Mouse metabolic/transport demand<br>reaction |
| MMGULLAct    | MMgthn[c] -> MMgthn[c]                                             | 0     | 1000 | 13340.1                                                                                                                                                                  | Mouse metabolic/transport demand<br>reaction |
| MMGULND      | MMh2o[c] + MMgthn[c] <=> MMh[c] + MMh2o[c] + MMgthn[c]             | -1000 | 1000 |                                                                                                                                                                          | Mouse metabolic/transport demand<br>reaction |
| MMGULNDer    | MMh[c] + MMnadh[c] + MMgthn[c] <=> MMnadh[c] + MMgthn[c]           | -1000 | 1000 |                                                                                                                                                                          | Mouse metabolic/transport demand<br>reaction |
| MMGULNer     | MMgthn[c] -> MMgthn[c]                                             | 0     | 1000 |                                                                                                                                                                          | Mouse metabolic/transport demand<br>reaction |
| MMGULNCha    | MMgthn[c] -> MMgthn[c]                                             | 0     | 1000 |                                                                                                                                                                          | Mouse metabolic/transport demand<br>reaction |
| MMGUMDCHa    | MMh[c] + MMgthn[c] <=> MMh[c] + MMgthn[c]                          | -1000 | 1000 |                                                                                                                                                                          | Mouse metabolic/transport demand<br>reaction |
| MMGUMGCHLe   | MMgthn[c] + MMgthn[c] -> MMgthn[c]                                 | 0     | 1000 |                                                                                                                                                                          | Mouse metabolic/transport demand<br>reaction |
| MMGUMGCHL    | MMh[c] + MMgthn[c] <=> MMh[c] + MMgthn[c]                          | -1000 | 1000 |                                                                                                                                                                          | Mouse metabolic/transport demand<br>reaction |
| MMGUMGCHOLe  | MMh2o[c] + MMgthn[c] -> MMgthn[c]                                  | 0     | 1000 |                                                                                                                                                                          | Mouse metabolic/transport demand<br>reaction |
| MMGUMGCHOLi  | MMh[c] + MMgthn[c] <=> MMh[c] + MMgthn[c]                          | -1000 | 1000 |                                                                                                                                                                          | Mouse metabolic/transport demand<br>reaction |
| MMGUMh       | MMh[c] + MMgthn[c] <=> MMh[c] + MMgthn[c]                          | -1000 | 1000 |                                                                                                                                                                          | Mouse metabolic/transport demand<br>reaction |
| MMGURIPP     | MMh2o[c] + MMgthn[c] -> MMgthn[c] + MMgthn[c]                      | 0     | 1000 |                                                                                                                                                                          | Mouse metabolic/transport demand<br>reaction |
| MMGUrTx      | MMh[c] + MMh[c] + MMgthn[c] -> MMh-L[c] + MMgthn[c]                | 0     | 1000 |                                                                                                                                                                          | Mouse metabolic/transport demand<br>reaction |
| MMHCO3D      | MMh2o[c] + MMh2o[c] <=> MMh2o[c]                                   | -1000 | 1000 | 14317.1 or 14317.2                                                                                                                                                       | Mouse metabolic/transport demand<br>reaction |
| MMHCO3D2     | MMh[c] + MMh2o[c] <=> MMh2o[c]                                     | -1000 | 1000 | 12354.1 or 76459.2 or 76459.1 or 12349.1 or 12351.1 or 12580.1 or 12346.1 or 71934.1 or 12354.2 or 23831.1 or 230099.1                                                   | Mouse metabolic/transport demand<br>reaction |
| MMHCO3D2n    | MMh[n] + MMh2o[n] <=> MMh2o[n]                                     | -1000 | 1000 |                                                                                                                                                                          | Mouse metabolic/transport demand<br>reaction |
| MMHCO3Dn     | MMh2o[n] + MMh2o[n] <=> MMh2o[n]                                   | -1000 | 1000 |                                                                                                                                                                          | Mouse metabolic/transport demand<br>reaction |
| MMH2ETer     | MMgthn[c] + MMgthn[c] -> MMgthn[c] + MMgthn[c]                     | 0     | 1000 | 12352.1 or 56078.1                                                                                                                                                       | Mouse metabolic/transport demand<br>reaction |
| MMH2MTer_L   | 0.1 MMh2nump_L[c] + MMgthn_L[c] -> 0.1 MMh2nump_L[c] + MMgthn_L[c] | 0     | 1000 | 27392.1 or 27392.2                                                                                                                                                       | Mouse metabolic/transport demand<br>reaction |
| MMH2MTer_U   | 0.1 MMh2nump_U[c] + MMgthn_U[c] -> 0.1 MMh2nump_U[c] + MMgthn_U[c] | 0     | 1000 | 23080.1                                                                                                                                                                  | Mouse metabolic/transport demand<br>reaction |
| MMH2O2yn     | MMh2o[c] + MMh[c] + MMgthn[c] -> MMh2o[c] + MMgthn[c]              | 0     | 1000 | 23080.1                                                                                                                                                                  | Mouse metabolic/transport demand<br>reaction |
| MMH2O2i      | MMh2o2[c] <=> MMh2o2[c]                                            | 0     | 1000 | 99439.1 or 99439.2 or 214593.1                                                                                                                                           | Mouse metabolic/transport demand<br>reaction |
| MMH2O2y      | MMh2o2[c] <=> MMh2o2[c]                                            | -1000 | 1000 |                                                                                                                                                                          | Mouse metabolic/transport demand<br>reaction |
| MMH2O2m      | MMh2o2[c] <=> MMh2o2[c]                                            | -1000 | 1000 |                                                                                                                                                                          | Mouse metabolic/transport demand<br>reaction |
| MMH2O2n      | MMh2o2[c] <=> MMh2o2[c]                                            | -1000 | 1000 |                                                                                                                                                                          | Mouse metabolic/transport demand<br>reaction |
| MMH2O2p      | MMh2o2[c] <=> MMh2o2[c]                                            | -1000 | 1000 |                                                                                                                                                                          | Mouse metabolic/transport demand<br>reaction |
| MMH2Ox       | MMh2o2[c] <=> MMh2o2[c]                                            | 0     | 1000 |                                                                                                                                                                          | Mouse metabolic/transport demand<br>reaction |
| MMH2Oer      | MMh2o2[c] <=> MMh2o2[c]                                            | -1000 | 1000 | 20537.1                                                                                                                                                                  | Mouse metabolic/transport demand<br>reaction |
| MMH2Og       | MMh2o2[c] <=> MMh2o2[c]                                            | -1000 | 1000 |                                                                                                                                                                          | Mouse metabolic/transport demand<br>reaction |
| MMH2Oy       | MMh2o2[c] <=> MMh2o2[c]                                            | -1000 | 1000 |                                                                                                                                                                          | Mouse metabolic/transport demand<br>reaction |
| MMH2Oon      | MMh2o2[c] <=> MMh2o2[c]                                            | -1000 | 1000 |                                                                                                                                                                          | Mouse metabolic/transport demand<br>reaction |
| MMH2Ow       | MMh2o2[a] <=> MMh2o2[a]                                            | -1000 | 1000 | 11833.1                                                                                                                                                                  | Mouse metabolic/transport demand<br>reaction |
| MMH2Op       | MMh2o2[c] <=> MMh2o2[c]                                            | -1000 | 1000 |                                                                                                                                                                          | Mouse metabolic/transport demand<br>reaction |
| MMH2ETer     | MMgthn[c] + MMh2nump_L[c] -> MMh2nump_L[c] + MMgthn[c]             | 0     | 1000 |                                                                                                                                                                          | Mouse metabolic/transport demand<br>reaction |
| MMH3MTer_L   | 0.1 MMh3nump_L[c] + MMgthn_L[c] -> 0.1 MMh3nump_L[c] + MMgthn_L[c] | 0     | 1000 | 27392.1 or 27392.2                                                                                                                                                       | Mouse metabolic/transport demand<br>reaction |
| MMH3MTer_U   | 0.1 MMh3nump_U[c] + MMgthn_U[c] -> 0.1 MMh3nump_U[c] + MMgthn_U[c] | 0     | 1000 | 55981.1                                                                                                                                                                  | Mouse metabolic/transport demand<br>reaction |
| MMH4ETer     | MMgthn[c] + MMh2nump_L[c] -> MMh2nump_L[c] + MMgthn[c]             | 0     | 1000 | 55981.1                                                                                                                                                                  | Mouse metabolic/transport demand<br>reaction |
| MMH4ETer     | MMgthn[c] + MMh2nump_L[c] -> MMh2nump_L[c] + MMgthn[c]             | 0     | 1000 | 56703.1 or 18701.1 or 18701.2 or 56703.2                                                                                                                                 | Mouse metabolic/transport demand<br>reaction |
| MMH5MTer_L   | 0.1 MMh5nump_L[c] + MMgthn_L[c] -> 0.1 MMh5nump_L[c] + MMgthn_L[c] | 0     | 1000 | 27392.1 or 27392.2                                                                                                                                                       | Mouse metabolic/transport demand<br>reaction |
| MMH5MTer_U   | MMh2nump_L[c] + MMgthn_L[c] -> MMh2nump_L[c] + MMgthn_L[c]         | 0     | 1000 | 23080.1                                                                                                                                                                  | Mouse metabolic/transport demand<br>reaction |
| MMH6ETer     | MMh2nump_L[c] + MMgthn_L[c] -> MMh2nump_L[c] + MMgthn_L[c]         | 0     | 1000 | 23080.1                                                                                                                                                                  | Mouse metabolic/transport demand<br>reaction |
| MMH6MTer_L   | 0.1 MMh6nump_L[c] + MMgthn_L[c] -> 0.1 MMh6nump_L[c] + MMgthn_L[c] | 0     | 1000 | 56703.1 or 18701.1 or 18701.2 or 56703.2                                                                                                                                 | Mouse metabolic/transport demand<br>reaction |
| MMH6MTer_U   | MMh2nump_L[c] + MMgthn_L[c] -> MMh2nump_L[c] + MMgthn_L[c]         | 0     | 1000 | 239827.1                                                                                                                                                                 | Mouse metabolic/transport demand<br>reaction |
| MMH6_ETer    | MMgthn[c] + MMh2nump_L[c] -> MMh2nump_L[c] + MMgthn[c]             | 0     | 1000 | 239827.1                                                                                                                                                                 | Mouse metabolic/transport demand<br>reaction |
| MMH6_ETer    | MMgthn[c] + MMh2nump_L[c] -> MMh2nump_L[c] + MMgthn[c]             | 0     | 1000 | 18701.1 or 433931.1 or 18701.2                                                                                                                                           | Mouse metabolic/transport demand<br>reaction |
| MMH7ETer     | MMgthn[c] + MMh2nump_L[c] -> MMh2nump_L[c] + MMgthn[c]             | 0     | 1000 | 27392.1 or 27392.2                                                                                                                                                       | Mouse metabolic/transport demand<br>reaction |
| MMH7MTer_L   | 0.1 MMh7nump_L[c] + MMgthn_L[c] -> 0.1 MMh7nump_L[c] + MMgthn_L[c] | 0     | 1000 | 18701.1 or 433931.1 or 18701.2                                                                                                                                           | Mouse metabolic/transport demand<br>reaction |
| MMH7MTer_U   | MMh2nump_L[c] + MMgthn_L[c] -> MMh2nump_L[c] + MMgthn_L[c]         | 0     | 1000 | 239827.1                                                                                                                                                                 | Mouse metabolic/transport demand<br>reaction |
| MMH7_ETer    | MMgthn[c] + MMh2nump_L[c] -> MMh2nump_L[c] + MMgthn[c]             | 0     | 1000 | 239827.1                                                                                                                                                                 | Mouse metabolic/transport demand<br>reaction |
| MMH7_TAr     | MMh2nump_L[c] + MMgthn_L[c] -> MMh2nump_L[c] + MMgthn_L[c]         | 0     | 1000 | 27392.1 or 27392.2                                                                                                                                                       | Mouse metabolic/transport demand<br>reaction |
| MMH8MTer_L   | 0.1 MMh8nump_L[c] + MMgthn_L[c] -> 0.1 MMh8nump_L[c] + MMgthn_L[c] | 0     | 1000 | 27846.1 or 78928.1 or 228812.1 or 14731.1 or 329777.1                                                                                                                    | Mouse metabolic/transport demand<br>reaction |
| MMH8MTer_U   | 0.1 MMh8nump_U[c] + MMgthn_U[c] -> 0.1 MMh8nump_U[c] + MMgthn_U[c] | 0     | 1000 | 239827.1                                                                                                                                                                 | Mouse metabolic/transport demand<br>reaction |
| MMH8Ar       | MMgthn[c] + MMh2nump_L[c] -> MMh2nump_L[c] + MMgthn[c]             | 0     | 1000 | 239827.1                                                                                                                                                                 | Mouse metabolic/transport demand<br>reaction |
| MMHACD1m     | MMh[n] + MMh2nump_L[c] -> MMh2nump_L[c] + MMh[n]                   | -1000 | 1000 | 27846.1 or 78928.1 or 228812.1 or 14731.1 or 329777.1                                                                                                                    | Mouse metabolic/transport demand<br>reaction |
| MMHACD1x     | MMh[n] + MMh2nump_L[c] -> MMh2nump_L[c] + MMh[n]                   | -1000 | 1000 | 15107.1 or 231086.1 or 97122.1 or 15108.1                                                                                                                                | Mouse metabolic/transport demand<br>reaction |
| MMHACD9m     | MMh[n] + MMh2nump_L[c] -> MMh2nump_L[c] + MMh[n]                   | -1000 | 1000 | 74447.1 or 15488.1                                                                                                                                                       | Mouse metabolic/transport demand<br>reaction |
| MMHAs1       | MMh2nump_L[c] + MMgthn_L[c] -> MMh2nump_L[c] + MMgthn_L[c]         | 0     | 1000 | 15108.1                                                                                                                                                                  | Mouse metabolic/transport demand<br>reaction |
| MMHAs2       | MMh2nump_L[c] + MMgthn_L[c] -> MMh2nump_L[c] + MMgthn_L[c]         | 0     | 1000 | 15118.1 or 15116.1 or 15117.1 or 15118.2                                                                                                                                 | Mouse metabolic/transport demand<br>reaction |
| MMHAsy       | MMh2nump_L[c] + MMgthn_L[c] -> MMh2nump_L[c] + MMgthn_L[c]         | 0     | 1000 | 15118.1 or 15116.1 or 15117.1 or 15118.2                                                                                                                                 | Mouse metabolic/transport demand<br>reaction |
| MMHBOPT10n   | MMh2nump_L[c] + MMgthn_L[c] -> MMh2nump_L[c] + MMgthn_L[c]         | 0     | 1000 |                                                                                                                                                                          | Mouse metabolic/transport demand<br>reaction |
| MMHCO3_CL    | MMh2o2[c] + MMh2o[c] <=> MMh2o2[c] + MMh2o[c]                      | -1000 | 1000 | 71883.1                                                                                                                                                                  | Mouse metabolic/transport demand<br>reaction |
| MMHCO3_Na    | MMh2o2[c] + MMh2o[c] <=> MMh2o2[c] + MMh2o[c]                      | -1000 | 1000 | 20533.1 or 20535.1 or 20536.1 or 240215.1 or 20536.2                                                                                                                     | Mouse metabolic/transport demand<br>reaction |
| MMHCO3MARIne | MMh2o2nump_L[c] <=> MMh2o2nump_L[c]                                | 0     | 1000 | 218756.1                                                                                                                                                                 | Mouse metabolic/transport demand<br>reaction |

|                            |                                                                                                                                                                                                         |       |      |                                                                                                                            |                                              |
|----------------------------|---------------------------------------------------------------------------------------------------------------------------------------------------------------------------------------------------------|-------|------|----------------------------------------------------------------------------------------------------------------------------|----------------------------------------------|
| MMHDC <sub>Ant</sub>       | MMHdc[s] → MMHdc[s]                                                                                                                                                                                     | 0     | 1000 |                                                                                                                            | Mouse metabolic/transport demand<br>reaction |
| MMHDC <sub>Ar</sub>        | MMHdc[s] ↔ MMHdc[s]                                                                                                                                                                                     | 0     | 1000 |                                                                                                                            | Mouse metabolic/transport demand<br>reaction |
| MMHDC <sub>Ar</sub>        | MMHdc[s] ↔ MMHdc[s]                                                                                                                                                                                     | 0     | 1000 |                                                                                                                            | Mouse metabolic/transport demand<br>reaction |
| MMHDC <sub>COAs</sub>      | MMHdc2co[s] ↔ MMHdc2co[s]                                                                                                                                                                               | -1000 | 1000 |                                                                                                                            | Mouse metabolic/transport demand<br>reaction |
| MMHSTRATRIOL <sub>ae</sub> | MMHestratrl[s] ↔ MMHestratrl[s]                                                                                                                                                                         | -1000 | 0    |                                                                                                                            | Mouse metabolic/transport demand<br>reaction |
| MMHSTRATRIOL <sub>ar</sub> | MMHestratrl[s] ↔ MMHestratrl[s]                                                                                                                                                                         | -1000 | 1000 |                                                                                                                            | Mouse metabolic/transport demand<br>reaction |
| MMH <sub>EX1</sub>         | MMHap[s] + MMH <sub>g</sub> -D[s] → MMHap[s] + MMH[s] + MMH <sub>g</sub> [p]                                                                                                                            | 0     | 1000 |                                                                                                                            | Mouse metabolic/transport demand<br>reaction |
| MMH <sub>EX10</sub>        | MMHap[s] + MMH <sub>g</sub> [n] → MMHap[s] + MMH[s] + MMH <sub>g</sub> [n][p]                                                                                                                           | 0     | 1000 | 15275.1 or 212032.1 or 103988.1 or 15275.2 or 15277.1 or 15275.3 or 103988.2 or 103988.3 or 15275.4 or 216019.1 or 15275.5 | Mouse metabolic/transport demand<br>reaction |
| MMH <sub>EX4</sub>         | MMHap[s] + MMH <sub>g</sub> [n] → MMHap[s] + MMH[s] + MMH <sub>g</sub> [n][p]                                                                                                                           | 0     | 1000 | 15275.1 or 212032.1 or 103988.1 or 15275.2 or 15277.1 or 15275.3 or 103988.2 or 103988.3 or 15275.4 or 216019.1 or 15275.5 | Mouse metabolic/transport demand<br>reaction |
| MMH <sub>EX7</sub>         | MMHap[s] + MMH <sub>g</sub> [n] → MMHap[s] + MMH[s] + MMH <sub>g</sub> [p]                                                                                                                              | 0     | 1000 | 15275.1 or 212032.1 or 103988.1 or 15275.2 or 15277.1 or 15275.3 or 103988.2 or 103988.3 or 15275.4 or 216019.1 or 15275.5 | Mouse metabolic/transport demand<br>reaction |
| MMH <sub>EXCCOAs</sub>     | MMH <sub>ex</sub> co[s] ↔ MMH <sub>ex</sub> co[s]                                                                                                                                                       | -1000 | 1000 |                                                                                                                            | Mouse metabolic/transport demand<br>reaction |
| MMH <sub>EXCCPT1</sub>     | MMH <sub>ex</sub> cp1[s] → MMH <sub>ex</sub> cp1[s]                                                                                                                                                     | 0     | 1000 |                                                                                                                            | Mouse metabolic/transport demand<br>reaction |
| MMH <sub>EXCCPT2</sub>     | MMH <sub>ex</sub> cp2[s] → MMH <sub>ex</sub> cp2[s]                                                                                                                                                     | 0     | 1000 | 12895.4 or 12894.1 or 78070.1 or 12895.2 or 12895.3 or 12895.1                                                             | Mouse metabolic/transport demand<br>reaction |
| MMH <sub>EXCCRN</sub>      | MMH <sub>ex</sub> ccrn[s] → MMH <sub>ex</sub> ccrn[s]                                                                                                                                                   | 0     | 1000 | 12896.1                                                                                                                    | Mouse metabolic/transport demand<br>reaction |
| MMH <sub>EXC1</sub>        | MMH <sub>ex</sub> c1[s] ↔ MMH <sub>ex</sub> c1[s]                                                                                                                                                       | 0     | 1000 | 57279.1                                                                                                                    | Mouse metabolic/transport demand<br>reaction |
| MMH <sub>GNTOR</sub>       | MMH <sub>g</sub> 2[s] + MMH <sub>g</sub> trn[s] → MMH <sub>g</sub> [n] + MMH <sub>g</sub> trn[s]                                                                                                        | 0     | 1000 |                                                                                                                            | Mouse metabolic/transport demand<br>reaction |
| MMH <sub>IBDn</sub>        | MMH <sub>g</sub> [n] + MMH <sub>g</sub> trn[s] → MMH <sub>g</sub> [n] + MMH <sub>g</sub> trn[s]                                                                                                         | -1000 | 1000 | 15233.1                                                                                                                    | Mouse metabolic/transport demand<br>reaction |
| MMH <sub>ISCAT1</sub>      | MMH <sub>g</sub> -L[s] ↔ MMH <sub>g</sub> -L[s]                                                                                                                                                         | -1000 | 1000 | 58875.1                                                                                                                    | Mouse metabolic/transport demand<br>reaction |
| MMH <sub>ISD</sub>         | MMH <sub>g</sub> -L[s] → MMH <sub>g</sub> [n] + MMH <sub>g</sub> trn[s]                                                                                                                                 | 0     | 1000 | 11987.1                                                                                                                    | Mouse metabolic/transport demand<br>reaction |
| MMH <sub>ISDC</sub>        | MMH <sub>g</sub> [n] + MMH <sub>g</sub> -L[s] → MMH <sub>g</sub> 2[s] + MMH <sub>g</sub> trn[s]                                                                                                         | 0     | 1000 | 15109.1                                                                                                                    | Mouse metabolic/transport demand<br>reaction |
| MMH <sub>ISLELAT2c</sub>   | MMH <sub>g</sub> -L[s] + MMH <sub>g</sub> -L[s] → MMH <sub>g</sub> -L[s] + MMH <sub>g</sub> -L[s]                                                                                                       | 0     | 1000 | 15186.1 or 13195.1                                                                                                         | Mouse metabolic/transport demand<br>reaction |
| MMH <sub>ISLAT1c</sub>     | MMH <sub>g</sub> -L[s] + MMH <sub>g</sub> -L[s] → MMH <sub>g</sub> -L[s] + MMH <sub>g</sub> -L[s]                                                                                                       | 0     | 1000 | (20539.1 and 17254.1)                                                                                                      | Mouse metabolic/transport demand<br>reaction |
| MMH <sub>ISPLAT2c</sub>    | MMH <sub>g</sub> -L[s] + MMH <sub>g</sub> -L[s] → MMH <sub>g</sub> -L[s] + MMH <sub>g</sub> -L[s]                                                                                                       | 0     | 1000 | (20539.1 and 17254.1)                                                                                                      | Mouse metabolic/transport demand<br>reaction |
| MMH <sub>ISNSAT3c</sub>    | MMH <sub>g</sub> [n] + MMH <sub>g</sub> [n] + MMH <sub>g</sub> -L[s] ↔ MMH <sub>g</sub> [n] + MMH <sub>g</sub> -L[s]                                                                                    | -1000 | 1000 | (20539.1 and 17254.1)                                                                                                      | Mouse metabolic/transport demand<br>reaction |
| MMH <sub>ISTASE</sub>      | MMH <sub>g</sub> 2[s] + MMH <sub>g</sub> 2[s] + MMH <sub>g</sub> 2[s] → MMH <sub>g</sub> 2[s] + MMH <sub>g</sub> 2[s]                                                                                   | 0     | 1000 | 209837.1                                                                                                                   | Mouse metabolic/transport demand<br>reaction |
| MMH <sub>ISTAVESEC</sub>   | 2 MMH <sub>g</sub> 2[s] + 2 MMH <sub>g</sub> 2[s] + 2 MMH <sub>g</sub> 2[s] → 2 MMH <sub>g</sub> 2[s] + 2 MMH <sub>g</sub> 2[s]                                                                         | 0     | 1000 | 237940.1 or 237940.2 or 76507.1                                                                                            | Mouse metabolic/transport demand<br>reaction |
| MMH <sub>ISTAu</sub>       | MMH <sub>g</sub> 2[s] ↔ MMH <sub>g</sub> 2[s]                                                                                                                                                           | 0     | 1000 | 214084.1 or 110877.1                                                                                                       | Mouse metabolic/transport demand<br>reaction |
| MMH <sub>ISPTc</sub>       | MMH <sub>g</sub> [n] + MMH <sub>g</sub> -L[s] → MMH <sub>g</sub> [n] + MMH <sub>g</sub> -L[s]                                                                                                           | 0     | 1000 | 20518.1 or 20519.1 or 20518.2                                                                                              | Mouse metabolic/transport demand<br>reaction |
| MMH <sub>IS4</sub>         | MMH <sub>g</sub> [n] + MMH <sub>g</sub> -L[s] → MMH <sub>g</sub> [n] + MMH <sub>g</sub> -L[s]                                                                                                           | 0     | 1000 | (65221.1 or 100561.1)                                                                                                      | Mouse metabolic/transport demand<br>reaction |
| MMH <sub>ISN1</sub>        | MMH <sub>g</sub> [n] + 2 MMH <sub>g</sub> [n] + MMH <sub>g</sub> -L[s] ↔ MMH <sub>g</sub> [n] + 2 MMH <sub>g</sub> [n] + MMH <sub>g</sub> -L[s]                                                         | 0     | 1000 | 67760.1 or 56774.1                                                                                                         | Mouse metabolic/transport demand<br>reaction |
| MMH <sub>ISDF</sub>        | MMH <sub>g</sub> -L[s] → MMH <sub>g</sub> -L[s]                                                                                                                                                         | 0     | 1000 | 76257.1                                                                                                                    | Mouse metabolic/transport demand<br>reaction |
| MMH <sub>ISLAtc</sub>      | MMH <sub>g</sub> [n] + MMH <sub>g</sub> -L[s] + MMH <sub>g</sub> -L[s] → MMH <sub>g</sub> [n] + MMH <sub>g</sub> -L[s]                                                                                  | 0     | 1000 | 69354.1                                                                                                                    | Mouse metabolic/transport demand<br>reaction |
| MMH <sub>ISLAtc</sub>      | MMH <sub>g</sub> [n] + MMH <sub>g</sub> -L[s] + MMH <sub>g</sub> -L[s] → MMH <sub>g</sub> [n] + MMH <sub>g</sub> -L[s]                                                                                  | 0     | 1000 | (20540.1 or (330836.1 and 17254.1))                                                                                        | Mouse metabolic/transport demand<br>reaction |
| MMH <sub>ISKYH</sub>       | MMH <sub>g</sub> 2[s] + MMH <sub>g</sub> 2[s] → MMH <sub>g</sub> 2[s] + MMH <sub>g</sub> 2[s]                                                                                                           | 0     | 1000 | (20540.1 or (330836.1 and 17254.1))                                                                                        | Mouse metabolic/transport demand<br>reaction |
| MMH <sub>IK</sub>          | MMH <sub>g</sub> 2[s] + MMH <sub>g</sub> 2[s] → MMH <sub>g</sub> 2[s] + MMH <sub>g</sub> 2[s]                                                                                                           | 0     | 1000 | 70789.1                                                                                                                    | Mouse metabolic/transport demand<br>reaction |
| MMH <sub>IMIS</sub>        | MMH <sub>g</sub> 2[s] + 4 MMH <sub>g</sub> 2[s] → 4 MMH <sub>g</sub> 2[s] + MMH <sub>g</sub> 2[s]                                                                                                       | 0     | 1000 | 11945.1 and 11944.1                                                                                                        | Mouse metabolic/transport demand<br>reaction |
| MMH <sub>IMCCOAr</sub>     | 2 MMH <sub>g</sub> + 2 MMH <sub>g</sub> 2[s] + MMH <sub>g</sub> 2[s] → 2 MMH <sub>g</sub> 2[s] + MMH <sub>g</sub> 2[s]                                                                                  | 0     | 1000 | 15288.1                                                                                                                    | Mouse metabolic/transport demand<br>reaction |
| MMH <sub>IMCCOAr</sub>     | 2 MMH <sub>g</sub> + 2 MMH <sub>g</sub> 2[s] + 2 MMH <sub>g</sub> 2[s] → 2 MMH <sub>g</sub> 2[s] + 2 MMH <sub>g</sub> 2[s]                                                                              | 0     | 1000 | 15357.1                                                                                                                    | Mouse metabolic/transport demand<br>reaction |
| MMH <sub>IMCCOAS</sub>     | MMH <sub>g</sub> 2[s] + MMH <sub>g</sub> 2[s] + MMH <sub>g</sub> 2[s] → MMH <sub>g</sub> 2[s] + MMH <sub>g</sub> 2[s]                                                                                   | 0     | 1000 | 15357.1                                                                                                                    | Mouse metabolic/transport demand<br>reaction |
| MMH <sub>IMCCOASn</sub>    | MMH <sub>g</sub> 2[s] + MMH <sub>g</sub> 2[s] + MMH <sub>g</sub> 2[s] → MMH <sub>g</sub> 2[s] + MMH <sub>g</sub> 2[s]                                                                                   | 0     | 1000 | 208715.1 or 208715.2                                                                                                       | Mouse metabolic/transport demand<br>reaction |
| MMH <sub>IMCCOAm</sub>     | MMH <sub>g</sub> 2[s] ↔ MMH <sub>g</sub> 2[s]                                                                                                                                                           | -1000 | 1000 | 15360.1                                                                                                                    | Mouse metabolic/transport demand<br>reaction |
| MMH <sub>IMCCOAS</sub>     | MMH <sub>g</sub> 2[s] ↔ MMH <sub>g</sub> 2[s]                                                                                                                                                           | -1000 | 1000 |                                                                                                                            | Mouse metabolic/transport demand<br>reaction |
| MMH <sub>IMG2n</sub>       | MMH <sub>g</sub> 2[s] → MMH <sub>g</sub> 2[s] + MMH <sub>g</sub> 2[s]                                                                                                                                   | 0     | 1000 |                                                                                                                            | Mouse metabolic/transport demand<br>reaction |
| MMH <sub>IMG2n</sub>       | MMH <sub>g</sub> 2[s] → MMH <sub>g</sub> 2[s] + MMH <sub>g</sub> 2[s]                                                                                                                                   | 0     | 1000 | 208962.1 or 15356.1                                                                                                        | Mouse metabolic/transport demand<br>reaction |
| MMH <sub>IMM4</sub>        | MMH <sub>g</sub> [n] + MMH <sub>g</sub> -L[s] → MMH <sub>g</sub> [n] + MMH <sub>g</sub> -L[s]                                                                                                           | 0     | 1000 | 15356.1                                                                                                                    | Mouse metabolic/transport demand<br>reaction |
| MMH <sub>IOXG</sub>        | 2 MMH <sub>g</sub> 2[s] + 5 MMH <sub>g</sub> 2[s] + 3 MMH <sub>g</sub> 2[s] + MMH <sub>g</sub> 2[s] → 3 MMH <sub>g</sub> 2[s] + 3 MMH <sub>g</sub> 2[s] + MMH <sub>g</sub> 2[s] + MMH <sub>g</sub> 2[s] | 0     | 1000 | 11989.1 or 11988.1 or 11987.1                                                                                              | Mouse metabolic/transport demand<br>reaction |
| MMH <sub>IPACr</sub>       | MMH <sub>g</sub> 2[s] → MMH <sub>g</sub> 2[s]                                                                                                                                                           | -1000 | 0    | 15368.1 or 15369.1                                                                                                         | Mouse metabolic/transport demand<br>reaction |
| MMH <sub>IPCLx</sub>       | 4 MMH <sub>g</sub> 2[s] + MMH <sub>g</sub> 2[s] → MMH <sub>g</sub> 2[s] + MMH <sub>g</sub> 2[s]                                                                                                         | 0     | 1000 |                                                                                                                            | Mouse metabolic/transport demand<br>reaction |
| MMH <sub>IPDCACNCP1</sub>  | MMH <sub>g</sub> 2[s] → MMH <sub>g</sub> 2[s]                                                                                                                                                           | 0     | 1000 |                                                                                                                            | Mouse metabolic/transport demand<br>reaction |
| MMH <sub>IPDCACNCP2</sub>  | MMH <sub>g</sub> 2[s] → MMH <sub>g</sub> 2[s]                                                                                                                                                           | 0     | 1000 | 12894.1 or 78070.1 or 12895.1 or 12895.2 or 12895.3                                                                        | Mouse metabolic/transport demand<br>reaction |
| MMH <sub>IPDCACRN</sub>    | MMH <sub>g</sub> 2[s] → MMH <sub>g</sub> 2[s]                                                                                                                                                           | 0     | 1000 | 12896.1                                                                                                                    | Mouse metabolic/transport demand<br>reaction |
| MMH <sub>IPDCAr</sub>      | MMH <sub>g</sub> 2[s] ↔ MMH <sub>g</sub> 2[s]                                                                                                                                                           | 0     | 1000 | 57279.1                                                                                                                    | Mouse metabolic/transport demand<br>reaction |
| MMH <sub>IPETARP1c</sub>   | 2 MMH <sub>g</sub> 2[s] ↔ 2 MMH <sub>g</sub> 2[s]                                                                                                                                                       | -1000 | 1000 |                                                                                                                            | Mouse metabolic/transport demand<br>reaction |
| MMH <sub>IPROm</sub>       | MMH <sub>g</sub> 2[s] + MMH <sub>g</sub> 2[s] → 2 MMH <sub>g</sub> 2[s] + MMH <sub>g</sub> 2[s]                                                                                                         | 0     | 1000 | 14080.1                                                                                                                    | Mouse metabolic/transport demand<br>reaction |
| MMH <sub>IPYDC</sub>       | MMH <sub>g</sub> [n] + MMH <sub>g</sub> 2[s] → MMH <sub>g</sub> 2[s] + MMH <sub>g</sub> 2[s]                                                                                                            | 0     | 1000 | 212647.1 or 212647.2                                                                                                       | Mouse metabolic/transport demand<br>reaction |
| MMH <sub>IPYDCn</sub>      | MMH <sub>g</sub> [n] + MMH <sub>g</sub> 2[s] → MMH <sub>g</sub> 2[s] + MMH <sub>g</sub> 2[s]                                                                                                            | 0     | 1000 |                                                                                                                            | Mouse metabolic/transport demand<br>reaction |
| MMH <sub>IPYR2x</sub>      | MMH <sub>g</sub> [n] + MMH <sub>g</sub> 2[s] + MMH <sub>g</sub> 2[s] → MMH <sub>g</sub> 2[s] + MMH <sub>g</sub> 2[s]                                                                                    | 0     | 1000 | 16833.1 or 16832.1 or 106557.1 or 16832.2 or 16832.1 and 16828.1 or 52815.1 or 16828.1 or 52815.2                          | Mouse metabolic/transport demand<br>reaction |
| MMH <sub>IPYRy</sub>       | MMH <sub>g</sub> [n] + MMH <sub>g</sub> 2[s] + MMH <sub>g</sub> 2[s] → MMH <sub>g</sub> 2[s] + MMH <sub>g</sub> 2[s]                                                                                    | 0     | 1000 | 16833.1 or 16832.1 or 106557.1 or 16832.2 or 16832.1 and 16828.1 or 52815.1 or 16828.1 or 52815.2                          | Mouse metabolic/transport demand<br>reaction |
| MMH <sub>IPYRy</sub>       | MMH <sub>g</sub> 2[s] ↔ MMH <sub>g</sub> 2[s]                                                                                                                                                           | -1000 | 1000 | 76238.1                                                                                                                    | Mouse metabolic/transport demand<br>reaction |
| MMH <sub>IRET7Nu</sub>     | MMH <sub>g</sub> 2[s] ↔ MMH <sub>g</sub> 2[s]                                                                                                                                                           | -1000 | 1000 |                                                                                                                            | Mouse metabolic/transport demand<br>reaction |
| MMH <sub>IS1y</sub>        | MMH <sub>g</sub> 2[s] + MMH <sub>g</sub> 2[s] → MMH <sub>g</sub> 2[s] + MMH <sub>g</sub> 2[s]                                                                                                           | 0     | 1000 |                                                                                                                            | Mouse metabolic/transport demand<br>reaction |
| MMH <sub>IS2y</sub>        | MMH <sub>g</sub> 2[s] + MMH <sub>g</sub> 2[s] → MMH <sub>g</sub> 2[s] + MMH <sub>g</sub> 2[s]                                                                                                           | 0     | 1000 | 27029.1                                                                                                                    | Mouse metabolic/transport demand<br>reaction |
| MMH <sub>IS3y</sub>        | MMH <sub>g</sub> 2[s] + MMH <sub>g</sub> 2[s] → MMH <sub>g</sub> 2[s] + MMH <sub>g</sub> 2[s]                                                                                                           | 0     | 1000 | 27029.1                                                                                                                    | Mouse metabolic/transport demand<br>reaction |
| MMH <sub>IS4y</sub>        | MMH <sub>g</sub> 2[s] + MMH <sub>g</sub> 2[s] → MMH <sub>g</sub> 2[s] + MMH <sub>g</sub> 2[s]                                                                                                           | 0     | 1000 | 27029.1                                                                                                                    | Mouse metabolic/transport demand<br>reaction |
| MMH <sub>ISAT7y</sub>      | MMH <sub>g</sub> 2[s] + MMH <sub>g</sub> 2[s] → MMH <sub>g</sub> 2[s] + MMH <sub>g</sub> 2[s]                                                                                                           | 0     | 1000 | 27029.1                                                                                                                    | Mouse metabolic/transport demand<br>reaction |
| MMH <sub>ISAT2y</sub>      | MMH <sub>g</sub> 2[s] + MMH <sub>g</sub> 2[s] → MMH <sub>g</sub> 2[s] + MMH <sub>g</sub> 2[s]                                                                                                           | 0     | 1000 |                                                                                                                            | Mouse metabolic/transport demand<br>reaction |
| MMH <sub>ISAT7y</sub>      | MMH <sub>g</sub> 2[s] + MMH <sub>g</sub> 2[s] → MMH <sub>g</sub> 2[s] + MMH <sub>g</sub> 2[s]                                                                                                           | 0     | 1000 |                                                                                                                            | Mouse metabolic/transport demand<br>reaction |
| MMH <sub>ISAT4y</sub>      | MMH <sub>g</sub> 2[s] + MMH <sub>g</sub> 2[s] → MMH <sub>g</sub> 2[s] + MMH <sub>g</sub> 2[s]                                                                                                           | 0     | 1000 |                                                                                                                            | Mouse metabolic/transport demand<br>reaction |
| MMH <sub>ISD1B1r</sub>     | MMH <sub>g</sub> 2[s] + MMH <sub>g</sub> 2[s] → MMH <sub>g</sub> 2[s] + MMH <sub>g</sub> 2[s]                                                                                                           | -1000 | 1000 |                                                                                                                            | Mouse metabolic/transport demand<br>reaction |
| MMH <sub>ISD1B2r</sub>     | MMH <sub>g</sub> 2[s] + MMH <sub>g</sub> 2[s] → MMH <sub>g</sub> 2[s] + MMH <sub>g</sub> 2[s]                                                                                                           | -1000 | 1000 | 15483.1 or 15483.2                                                                                                         | Mouse metabolic/transport demand<br>reaction |
| MMH <sub>ISD1B1r</sub>     | MMH <sub>g</sub> 2[s] + MMH <sub>g</sub> 2[s] → MMH <sub>g</sub> 2[s] + MMH <sub>g</sub> 2[s]                                                                                                           | -1000 | 1000 | 15484.1                                                                                                                    | Mouse metabolic/transport demand<br>reaction |
| MMH <sub>ISD1B2r</sub>     | MMH <sub>g</sub> 2[s] + MMH <sub>g</sub> 2[s] → MMH <sub>g</sub> 2[s] + MMH <sub>g</sub> 2[s]                                                                                                           | 0     | 1000 | 14979.1 or 15485.1                                                                                                         | Mouse metabolic/transport demand<br>reaction |
| MMH <sub>ISD1B3r</sub>     | MMH <sub>g</sub> 2[s] + MMH <sub>g</sub> 2[s] → MMH <sub>g</sub> 2[s] + MMH <sub>g</sub> 2[s]                                                                                                           | 0     | 1000 | 15486.1                                                                                                                    | Mouse metabolic/transport demand<br>reaction |
| MMH <sub>ISD1B4r</sub>     | MMH <sub>g</sub> 2[s] + MMH <sub>g</sub> 2[s] → MMH <sub>g</sub> 2[s] + MMH <sub>g</sub> 2[s]                                                                                                           | 0     | 1000 | 15487.1                                                                                                                    | Mouse metabolic/transport demand<br>reaction |
| MMH <sub>ISD1B4r</sub>     | MMH <sub>g</sub> 2[s] + MMH <sub>g</sub> 2[s] → MMH <sub>g</sub> 2[s] + MMH <sub>g</sub> 2[s]                                                                                                           | 0     | 1000 | 15488.1                                                                                                                    | Mouse metabolic/transport demand<br>reaction |
| MMH <sub>ISD1B7r</sub>     | MMH <sub>g</sub> 2[s] + MMH <sub>g</sub> 2[s] → MMH <sub>g</sub> 2[s] + MMH <sub>g</sub> 2[s]                                                                                                           | 0     | 1000 | 15488.1                                                                                                                    | Mouse metabolic/transport demand<br>reaction |
| MMH <sub>ISD1B8r</sub>     | MMH <sub>g</sub> 2[s] + MMH <sub>g</sub> 2[s] → MMH <sub>g</sub> 2[s] + MMH <sub>g</sub> 2[s]                                                                                                           | 0     | 1000 | 15490.1                                                                                                                    | Mouse metabolic/transport demand<br>reaction |
| MMH <sub>ISD1B9r</sub>     | 1.5 MMH <sub>g</sub> 2[s] + MMH <sub>g</sub> 2[s] + MMH <sub>g</sub> 2[s] → 2 MMH <sub>g</sub> 2[s] + MMH <sub>g</sub> 2[s]                                                                             | 0     | 1000 | 15486.1                                                                                                                    | Mouse metabolic/transport demand<br>reaction |
| MMH <sub>ISD3A1r</sub>     | MMH <sub>g</sub> 2[s] + MMH <sub>g</sub> 2[s] → MMH <sub>g</sub> 2[s] + MMH <sub>g</sub> 2[s]                                                                                                           | -1000 | 1000 | 15490.1                                                                                                                    | Mouse metabolic/transport demand<br>reaction |
| MMH <sub>ISD3A2r</sub>     | MMH <sub>g</sub> 2[s] + MMH <sub>g</sub> 2[s] → MMH <sub>g</sub> 2[s] + MMH <sub>g</sub> 2[s]                                                                                                           | -1000 | 1000 | 83702.1                                                                                                                    | Mouse metabolic/transport demand<br>reaction |
| MMH <sub>ISD1B11</sub>     | MMH <sub>g</sub> 2[s] + MMH <sub>g</sub> 2[s] → MMH <sub>g</sub> 2[s] + MMH <sub>g</sub> 2[s]                                                                                                           | 0     | 1000 | 83702.1                                                                                                                    | Mouse metabolic/transport demand<br>reaction |

|                |                                                                                                                       |       |      |                                                                                                                                    |                                           |
|----------------|-----------------------------------------------------------------------------------------------------------------------|-------|------|------------------------------------------------------------------------------------------------------------------------------------|-------------------------------------------|
| MMBSDB11c      | $MMnu[n] + MMpgrnole[r] \rightarrow MMh[c] + MMnuh[c] + MMpgrnole[r]$                                                 | 0     | 1000 | 15493.1                                                                                                                            | Mouse metabolic/transport demand reaction |
| MMBSDB12c      | $MMnuh[r] + MMhade[r] \rightarrow MMh[c] + MMnuh[c] + MMhade[r]$                                                      | 0     | 1000 | 15492.1                                                                                                                            | Mouse metabolic/transport demand reaction |
| MMBSDB13       | $MMnuh[c] + MM17alopnole[c] \rightarrow MMh[c] + MMnuh[c] + MM17alopnole[c]$                                          | 0     | 1000 | 15492.1                                                                                                                            | Mouse metabolic/transport demand reaction |
| MMBSDB13c      | $MMnuh[r] + MM17alopnole[r] \rightarrow MMh[c] + MMnuh[c] + MM17alopnole[r]$                                          | 0     | 1000 | 15493.1                                                                                                                            | Mouse metabolic/transport demand reaction |
| MMBSDB13d      | $MMh[c] + MMnuh[r] \rightarrow MMnuh[r] \rightarrow MMh2o[r] + MMnuh[r] + MMnuhade[r]$                                | 0     | 1000 | 15492.1                                                                                                                            | Mouse metabolic/transport demand reaction |
| MMBSDB13e      | $MMh[c] + MMnuh[r] + MMnuhade[r] \rightarrow MMh2o[r] + MMnuh[r] + MMnuhade[r]$                                       | 0     | 1000 | 15492.1                                                                                                                            | Mouse metabolic/transport demand reaction |
| MMBSDB17       | $MMnuh[r] + MMnuhade[r] \rightarrow MMh[c] + MMnuh[c] + MMnuhade[r]$                                                  | 0     | 1000 | 15492.1                                                                                                                            | Mouse metabolic/transport demand reaction |
| MMBSDB18PT     | $MMnuh[r] + MMnuhade[r] \rightarrow MMh[c] + MMnuh[c] + MMnuhade[r]$                                                  | 0     | 1000 | 101502.1                                                                                                                           | Mouse metabolic/transport demand reaction |
| MMHSFASbly     | $MMh2o[r] + MMpup[r] \rightarrow MMSer, Gly, Ala, X, Gly[r] + MMhu[r]$                                                | 0     | 1000 | 101502.1                                                                                                                           | Mouse metabolic/transport demand reaction |
| MMHSFGa        | $MMhsp[gl] \rightarrow MMhsp[gl]$                                                                                     | 0     | 1000 |                                                                                                                                    | Mouse metabolic/transport demand reaction |
| MMHSFGdy       | $MMhsp[gl] \rightarrow MMhsp[gl]$                                                                                     | 0     | 1000 |                                                                                                                                    | Mouse metabolic/transport demand reaction |
| MMHTAXOLa      | $MMhaxol[c] \leftrightarrow MMhaxol[c]$                                                                               | 0     | 1000 |                                                                                                                                    | Mouse metabolic/transport demand reaction |
| MMHFCASd       | $MMhuan[r] \leftrightarrow MMhuan[r]$                                                                                 | -1000 | 1000 |                                                                                                                                    | Mouse metabolic/transport demand reaction |
| MMHCANx        | $MMhuan[c] \rightarrow MMhuan[c]$                                                                                     | 0     | 1000 | 71279.1                                                                                                                            | Mouse metabolic/transport demand reaction |
| MMHXPT         | $MMhsp[c] + MMhuan[c] \rightarrow MMhsp[c] + MMhsp[c]$                                                                | 0     | 1000 |                                                                                                                                    | Mouse metabolic/transport demand reaction |
| MMHYPOE        | $MMh2o[c] + MMpym5p[c] \rightarrow MMh[c] + MMpymuan[c]$                                                              | 0     | 1000 | 15452.1                                                                                                                            | Mouse metabolic/transport demand reaction |
| MMHYPTROX      | $MMa2[c] + 2 MMh[c] + 2 MMhptuar[c] \rightarrow 2 MMhuan[c]$                                                          | 0     | 1000 | 57028.1                                                                                                                            | Mouse metabolic/transport demand reaction |
| MMHYXNt        | $MMhuan[c] \leftrightarrow MMhuan[c]$                                                                                 | 0     | 1000 |                                                                                                                                    | Mouse metabolic/transport demand reaction |
| MMHtg          | $MMh[gl] \leftrightarrow MMh[c]$                                                                                      | -1000 | 1000 | 13340.1                                                                                                                            | Mouse metabolic/transport demand reaction |
| MMHtm          | $MMh[c] \rightarrow MMh[tm]$                                                                                          | 0     | 1000 |                                                                                                                                    | Mouse metabolic/transport demand reaction |
| MMHtr          | $MMh[c] \leftrightarrow MMh[r]$                                                                                       | -1000 | 1000 | 2229.1 or 74011.1 or 2229.2 or 2228.1 or 2227.1 or 20523.1 or 20532.2                                                              | Mouse metabolic/transport demand reaction |
| MMHts          | $MMh[c] \leftrightarrow MMh[s]$                                                                                       | -1000 | 1000 |                                                                                                                                    | Mouse metabolic/transport demand reaction |
| MMICD8tm       | $MMnuh[m] + MMh2o[m] \rightarrow MMakg[m] + MMh2o[m] + MMnuh[m]$                                                      | 0     | 1000 |                                                                                                                                    | Mouse metabolic/transport demand reaction |
| MMICDHy        | $MMnuh[r] + MMh2o[r] \rightarrow MMnuh[r] + MMakg[r] + MMh2o[r]$                                                      | 0     | 1000 | 15929.1 and 67834.1 and 170718.1 or 15929.1 and 67834.1 and 170718.2 or 15929.2 and 67834.1 and 170718.3 and 170718.4 and 170718.5 | Mouse metabolic/transport demand reaction |
| MMICDhp        | $MMnuh[r] + MMh2o[r] \rightarrow MMakg[r] + MMh2o[r] + MMnuh[r]$                                                      | 0     | 1000 | 15926.1                                                                                                                            | Mouse metabolic/transport demand reaction |
| MMICD8rm       | $MMnuh[m] + MMh2o[m] \leftrightarrow MMnuh[m] + MMakg[m] + MMh2o[m]$                                                  | -1000 | 1000 | 15926.1                                                                                                                            | Mouse metabolic/transport demand reaction |
| MMIDHPOXO2b    | $MMh3p[Lc] + MMh2o[c] \rightarrow MMh[c] + MMh[c] + MMh3p[Lc]$                                                        | 0     | 1000 | 269951.1                                                                                                                           | Mouse metabolic/transport demand reaction |
| MMIDHPOXO3     | $MMh2o[c] + MMh3p[Lc] + MMh3p[Lc] \rightarrow 2 MMh2o[c] + MMh3p[Lc] + MMh3p[Lc]$                                     | 0     | 1000 | 22018.1 or 22018.2 or 22018.3 or 22018.4 or 22018.5                                                                                | Mouse metabolic/transport demand reaction |
| MMIDHPOXO3a    | $MMh2o[c] + 2 MMh3p[Lc] \rightarrow 2 MMh2o[c] + MMh3p[Lc] + MMh3p[Lc]$                                               | 0     | 1000 | 22018.1 or 22018.2 or 22018.3 or 22018.4 or 22018.5                                                                                | Mouse metabolic/transport demand reaction |
| MMIDHPOXO3b    | $MMh2o[c] + MMh3p[Lc] \rightarrow MMh[c] + MMh[c] + MMh3p[Lc]$                                                        | 0     | 1000 | 22018.1 or 22018.2 or 22018.3 or 22018.4 or 22018.5                                                                                | Mouse metabolic/transport demand reaction |
| MMIDOAASE1b    | $MMh2o[r] + MMts_deg[r] \rightarrow MMts_deg[r] + MMhuan[r]$                                                          | 0     | 1000 | 22018.1 or 22018.2 or 22018.3 or 22018.4 or 22018.5                                                                                | Mouse metabolic/transport demand reaction |
| MMIDOAASE2b    | $MMh2o[r] + MMts_deg[r] \rightarrow MMhuan[r] + MMts_deg[r]$                                                          | 0     | 1000 | 15932.1                                                                                                                            | Mouse metabolic/transport demand reaction |
| MMIDOAASE3b    | $MMh2o[r] + MMts_deg[r] \rightarrow MMhuan[r] + MMts_deg[r]$                                                          | 0     | 1000 | 15932.1                                                                                                                            | Mouse metabolic/transport demand reaction |
| MMIDOAASE4b    | $MMh2o[r] + MMts_deg[r] \rightarrow MMts_a_deg[r] + MMhuan[r]$                                                        | 0     | 1000 | 15932.1                                                                                                                            | Mouse metabolic/transport demand reaction |
| MMIDOURdy      | $MMh[c] + MMh2o[r] \leftrightarrow MMh[r] + MMh2o[r]$                                                                 | -1000 | 1000 | 15932.1                                                                                                                            | Mouse metabolic/transport demand reaction |
| MMIDPn         | $MMh2p[c] \leftrightarrow MMh2p[c]$                                                                                   | -1000 | 1000 | 235504.1                                                                                                                           | Mouse metabolic/transport demand reaction |
| MMILEAT0b      | $2 MMhuan[r] + MMh2o[r] + MMh2o[r] + MMh2o[r] + MMh2o[r] + MMh2o[r]$                                                  | 0     | 1000 |                                                                                                                                    | Mouse metabolic/transport demand reaction |
| MMILEB0A7c     | $MMhuan[r] + MMh2o[r] \rightarrow MMhuan[r] + MMh2o[r]$                                                               | 0     | 1000 | 56774.1                                                                                                                            | Mouse metabolic/transport demand reaction |
| MMILELAT1c     | $MMhuan[r] + MMh2o[r] \rightarrow MMhuan[r] + MMh2o[r]$                                                               | 0     | 1000 | (70008.1 or 74338.1 and 57394.1)                                                                                                   | Mouse metabolic/transport demand reaction |
| MMILEPHEAT2c   | $MMh2o[r] + MMh2o[r] \rightarrow MMh2o[r] + MMh2o[r]$                                                                 | 0     | 1000 | (20539.1 and 17254.1)                                                                                                              | Mouse metabolic/transport demand reaction |
| MMILETA        | $MMh2o[r] + MMh2o[r] \rightarrow MMh2o[r] + MMh2o[r]$                                                                 | -1000 | 1000 | (20539.1 and 17254.1)                                                                                                              | Mouse metabolic/transport demand reaction |
| MMILETAm       | $MMh2o[r] + MMh2o[r] \rightarrow MMh2o[r] + MMh2o[r]$                                                                 | -1000 | 1000 | 12035.1                                                                                                                            | Mouse metabolic/transport demand reaction |
| MMILEJ4        | $MMhuan[r] + MMh2o[r] \rightarrow MMhuan[r] + MMh2o[r]$                                                               | 0     | 1000 | 12036.1                                                                                                                            | Mouse metabolic/transport demand reaction |
| MMILEJ5m       | $MMhuan[r] + MMh2o[r] \rightarrow MMhuan[r] + MMh2o[r]$                                                               | -1000 | 1000 | 56774.1                                                                                                                            | Mouse metabolic/transport demand reaction |
| MMILEJ6c       | $MMhuan[r] + MMh2o[r] \rightarrow MMhuan[r] + MMh2o[r]$                                                               | 0     | 1000 |                                                                                                                                    | Mouse metabolic/transport demand reaction |
| MMIMACTD       | $MMh2o[c] + MMhuan[c] + MMhuan[c] \rightarrow 2 MMh[c] + MMhuan[c]$                                                   | 0     | 1000 | 215113.1 or 72401.1                                                                                                                | Mouse metabolic/transport demand reaction |
| MMIMACTD_m     | $MMh2o[m] + MMhuan[m] + MMhuan[m] \rightarrow 2 MMh[m] + MMhuan[m]$                                                   | 0     | 1000 | 19378.1 or 56752.1 or 11095.1 or 11668.1 or 11671.1 or 19378.2 or 19378.4                                                          | Mouse metabolic/transport demand reaction |
| MMIMPC         | $MMh2o[c] + MMhuan[c] \rightarrow MMhuan[c] + MMhuan[c]$                                                              | -1000 | 1000 | 11669.1 or 212647.1 or 212647.2 or 72535.1                                                                                         | Mouse metabolic/transport demand reaction |
| MMIMPD         | $MMh2o[c] + MMhuan[c] \rightarrow MMhuan[c] + MMhuan[c]$                                                              | 0     | 1000 | 108147.1                                                                                                                           | Mouse metabolic/transport demand reaction |
| MMINOSTD       | $MMh2o[c] + MMhuan[c] \rightarrow MMhuan[c] + MMhuan[c]$                                                              | 0     | 1000 | 22917.1 or 22918.1 or 22917.2                                                                                                      | Mouse metabolic/transport demand reaction |
| MMINSKm        | $MMhuan[m] + MMhuan[m] \rightarrow MMhuan[m] + MMhuan[m]$                                                             | 0     | 1000 | 56727.1                                                                                                                            | Mouse metabolic/transport demand reaction |
| MMINST2c       | $MMhuan[c] + MMhuan[c] \rightarrow MMhuan[c] + MMhuan[c]$                                                             | 0     | 1000 |                                                                                                                                    | Mouse metabolic/transport demand reaction |
| MMINST4        | $MMhuan[c] + MMhuan[c] \rightarrow MMhuan[c] + MMhuan[c]$                                                             | 0     | 1000 | 239606.1                                                                                                                           | Mouse metabolic/transport demand reaction |
| MMINST4_2      | $2 MMhuan[c] + MMhuan[c] \rightarrow 2 MMhuan[c] + MMhuan[c]$                                                         | 0     | 1000 | 53881.1                                                                                                                            | Mouse metabolic/transport demand reaction |
| MMINSi         | $MMhuan[c] \leftrightarrow MMhuan[c]$                                                                                 | 0     | 1000 | 233836.1                                                                                                                           | Mouse metabolic/transport demand reaction |
| MMINS4         | $MMhuan[c] + MMhuan[c] \rightarrow MMhuan[c] + MMhuan[c]$                                                             | 0     | 1000 | 13340.1 or 63959.1                                                                                                                 | Mouse metabolic/transport demand reaction |
| MMINS5         | $2 MMhuan[c] + MMhuan[c] \rightarrow 2 MMhuan[c] + MMhuan[c]$                                                         | 0     | 1000 | 114304.1 or 269346.1                                                                                                               | Mouse metabolic/transport demand reaction |
| MMINS5d        | $MMhuan[c] \leftrightarrow MMhuan[c]$                                                                                 | -1000 | 1000 | 114304.1                                                                                                                           | Mouse metabolic/transport demand reaction |
| MMINS5m        | $MMhuan[c] \leftrightarrow MMhuan[c]$                                                                                 | -1000 | 1000 | 71279.1                                                                                                                            | Mouse metabolic/transport demand reaction |
| MMIPDDa        | $MMhuan[c] \leftrightarrow MMhuan[c]$                                                                                 | -1000 | 1000 | 63959.1                                                                                                                            | Mouse metabolic/transport demand reaction |
| MMIPDPw        | $MMhuan[c] \leftrightarrow MMhuan[c]$                                                                                 | -1000 | 1000 | 319554.1 or 320581.1                                                                                                               | Mouse metabolic/transport demand reaction |
| MMIPDPs        | $MMhuan[c] \leftrightarrow MMhuan[c]$                                                                                 | -1000 | 1000 |                                                                                                                                    | Mouse metabolic/transport demand reaction |
| MMITCOAL1m     | $MMhuan[m] + MMhuan[m] + MMhuan[m] \rightarrow MMhuan[m] + MMhuan[m] + MMhuan[m]$                                     | -1000 | 1000 |                                                                                                                                    | Mouse metabolic/transport demand reaction |
| MMITCOALm      | $MMhuan[m] + MMhuan[m] + MMhuan[m] \rightarrow MMhuan[m] + MMhuan[m] + MMhuan[m]$                                     | -1000 | 1000 | 20917.1 and 56451.1                                                                                                                | Mouse metabolic/transport demand reaction |
| MMITPa         | $MMhuan[c] \leftrightarrow MMhuan[c]$                                                                                 | -1000 | 1000 | 56451.1 and 20916.1                                                                                                                | Mouse metabolic/transport demand reaction |
| MMIZPN         | $MMhuan[c] + MMhuan[c] \rightarrow MMhuan[c] + MMhuan[c]$                                                             | 0     | 1000 |                                                                                                                                    | Mouse metabolic/transport demand reaction |
| MMh            | $MMh[c] \leftrightarrow MMh[c]$                                                                                       | 0     | 1000 |                                                                                                                                    | Mouse metabolic/transport demand reaction |
| MMKAS8         | $20 MMh[c] + 14 MMhuan[c] + MMhuan[c] + 7 MMhuan[c] \rightarrow 6 MMh2o[c] + 14 MMhuan[c] + 7 MMh2o[c] + 8 MMhuan[c]$ | 0     | 1000 | 216225.1                                                                                                                           | Mouse metabolic/transport demand reaction |
| MMKCC2a        | $MMhuan[c] + MMhuan[c] \rightarrow MMhuan[c] + MMhuan[c]$                                                             | -1000 | 1000 | 14104.1                                                                                                                            | Mouse metabolic/transport demand reaction |
| MMKCC1         | $MMhuan[c] + MMhuan[c] \rightarrow MMhuan[c] + MMhuan[c]$                                                             | -1000 | 1000 | 107723.1 or 20499.1 or 20498.1                                                                                                     | Mouse metabolic/transport demand reaction |
| MMKZNH         | $MMhuan[c] + MMhuan[c] \rightarrow MMhuan[c] + MMhuan[c]$                                                             | 0     | 1000 | 107723.1 or 20499.1 or 57138.1 or 20498.1                                                                                          | Mouse metabolic/transport demand reaction |
| MMKHK          | $MMhuan[c] + MMhuan[c] \rightarrow MMhuan[c] + MMhuan[c]$                                                             | 0     | 1000 |                                                                                                                                    | Mouse metabolic/transport demand reaction |
| MMKH2          | $MMhuan[c] + MMhuan[c] \rightarrow MMhuan[c] + MMhuan[c]$                                                             | 0     | 1000 | 16548.1 or 16548.2                                                                                                                 | Mouse metabolic/transport demand reaction |
| MMKH3          | $MMhuan[c] + MMhuan[c] \rightarrow MMhuan[c] + MMhuan[c]$                                                             | 0     | 1000 | 16548.1 or 16548.2                                                                                                                 | Mouse metabolic/transport demand reaction |
| MMKSII_CORE2c  | $MMhuan[c] + MMhuan[c] \rightarrow MMhuan[c] + MMhuan[c]$                                                             | 0     | 1000 | 16548.1 or 16548.2                                                                                                                 | Mouse metabolic/transport demand reaction |
| MMKSII_CORE2dy | $MMhuan[c] + MMhuan[c] \rightarrow MMhuan[c] + MMhuan[c]$                                                             | 0     | 1000 |                                                                                                                                    | Mouse metabolic/transport demand reaction |
| MMKSII_CORE4c  | $MMhuan[c] + MMhuan[c] \rightarrow MMhuan[c] + MMhuan[c]$                                                             | 0     | 1000 |                                                                                                                                    | Mouse metabolic/transport demand reaction |
| MMKSII_CORE4dy | $MMhuan[c] + MMhuan[c] \rightarrow MMhuan[c] + MMhuan[c]$                                                             | 0     | 1000 |                                                                                                                                    | Mouse metabolic/transport demand reaction |
| MMKSII         | $MMhuan[c] \rightarrow MMhuan[c]$                                                                                     | 0     | 1000 |                                                                                                                                    | Mouse metabolic/transport demand reaction |
| MMKSIIb        | $MMhuan[c] \rightarrow MMhuan[c]$                                                                                     | 0     | 1000 |                                                                                                                                    | Mouse metabolic/transport demand reaction |
| MMKYN          | $MMhuan[c] + MMhuan[c] \rightarrow MMhuan[c] + MMhuan[c]$                                                             | 0     | 1000 |                                                                                                                                    | Mouse metabolic/transport demand reaction |
| MMKYN3OX       | $MMhuan[c] + MMhuan[c] \rightarrow MMhuan[c] + MMhuan[c]$                                                             | 0     | 1000 | 70789.1                                                                                                                            | Mouse metabolic/transport demand reaction |
| MMKYNKAT       | $MMhuan[c] + MMhuan[c] \rightarrow MMhuan[c] + MMhuan[c]$                                                             | 0     | 1000 | 98256.1                                                                                                                            | Mouse metabolic/transport demand reaction |

|                 |                                                                        |       |      |                                                                                                              |                                           |
|-----------------|------------------------------------------------------------------------|-------|------|--------------------------------------------------------------------------------------------------------------|-------------------------------------------|
| MMKYNATESYN     | MM4qubd[h] -> MM2b[c] + MMKynat[c]                                     | 0     | 1000 | 29323.1 or 70266.1 or 29323.2                                                                                | Moose metabolic/transport demand reaction |
| MMKClg          | MMl[g] + MMl[c] -> MMb[c] + MMl[g]                                     | -1000 | 1000 |                                                                                                              | Moose metabolic/transport demand reaction |
| MMlACz6         | MMb2[c] + MMks[c] -> MMg6-D[e] + MMg6[e]                               | 0     | 1000 | 236727.1 or 77031.1                                                                                          | Moose metabolic/transport demand reaction |
| MMlACz9         | MMb2[h] + MMks[h] -> MMg9[e] + MMg6-D[e]                               | 0     | 1000 | 226413.1                                                                                                     | Moose metabolic/transport demand reaction |
| MMlALDD         | MMbnd[c] + MMlald-D[e] -> MMb[c] + MMbndp[c] + MMlald-D[e]             | -1000 | 1000 | 50917.4 or 19025.1 or 12091.1 or 18103.1                                                                     | Moose metabolic/transport demand reaction |
| MMlALDD         | MMbnd[c] + MMlald[e] + MMlald-D[e] -> MMb[c] + MMlald-D[e]             | -1000 | 1000 | 76238.1                                                                                                      | Moose metabolic/transport demand reaction |
| MMlALDD2        | MMb[c] + MMbndp[c] + MMbndp[c] -> MMbndp[c] + MMlald-D[e]              | 0     | 1000 | 11532.1                                                                                                      | Moose metabolic/transport demand reaction |
| MMlALDDz3       | MMb[c] + MMbnd[c] + MMbndp[c] -> MMbnd[c] + MMlald-D[e]                | 0     | 1000 | 110198.1 or 58810.2 or 11677.1 or 58810.1                                                                    | Moose metabolic/transport demand reaction |
| MMlALFOAI       | MMb2[h] + MMfcol[e] -> MMp[h] + MMdcoq[e]                              | 0     | 1000 | 110198.1                                                                                                     | Moose metabolic/transport demand reaction |
| MMlLCAz8        | MMb2[c] + MMbnd[c] + MMlald-D[e] -> 2 MMb[c] + MMbndp[c] + MMlald-D[e] | 0     | 1000 | 11432.1                                                                                                      | Moose metabolic/transport demand reaction |
| MMlLCAzD        | MMb2[c] + MMbnd[c] + MMlald-D[e] -> 2 MMb[c] + MMbndp[c]               | 0     | 1000 | 19378.1 or 56752.1 or 11670.1 or 110695.1 or 61689.1 or 56847.1 or 116683.1 or 11671.1 or 19378.3 or 19379.3 | Moose metabolic/transport demand reaction |
| MMlLCAzDm       | MMb2[m] + MMbnd[m] + MMlald-D[m] -> 2 MMb[m] + MMbndp[m] + MMlald-D[m] | 0     | 1000 | 19378.1 or 56752.1 or 11670.1 or 110695.1 or 61689.1 or 56847.1 or 116683.1 or 11671.1 or 19378.3 or 19379.3 | Moose metabolic/transport demand reaction |
| MMlLCAzDm       | MMb2[m] + MMbnd[m] + MMlald-D[m] -> 2 MMb[m] + MMbndp[m] + MMlald-D[m] | 0     | 1000 | 104776.1 or 11669.1 or 21267.1 or 214579.1 or 56454.1 or 214579.2 or 212647.2 or 72535.1                     | Moose metabolic/transport demand reaction |
| MMlLCAzE        | MMb2[c] + MMbnd[c] + MMlald-D[e] -> 2 MMb[c] + MMbndp[c]               | 0     | 1000 | 104776.1 or 11669.1 or 21267.1 or 214579.1 or 56454.1 or 214579.2 or 212647.2 or 72535.1                     | Moose metabolic/transport demand reaction |
| MMlLCTStg       | MMks[g] -> MMks[c]                                                     | 0     | 1000 | 16816.1                                                                                                      | Moose metabolic/transport demand reaction |
| MMlLCTStl       | MMks[c] -> MMks[h]                                                     | 0     | 1000 |                                                                                                              | Moose metabolic/transport demand reaction |
| MMlLCTSTAT      | MMlLysn[c] + MMak[c] -> MMg6-L[e] + MMlDapn[c]                         | -1000 | 1000 |                                                                                                              | Moose metabolic/transport demand reaction |
| MMlLCTSTATm     | MMak[m] + MMlLysn[m] -> MMg6-L[m] + MMlDapn[m]                         | -1000 | 1000 | 14718.1                                                                                                      | Moose metabolic/transport demand reaction |
| MMlLCTSTBOXL    | MMb[c] + MMlLysn[c] -> MMks2[h] + MMbndp[c]                            | 0     | 1000 | 14719.1                                                                                                      | Moose metabolic/transport demand reaction |
| MMlLDH-D        | MMbnd[c] + MMlald-D[e] -> MMb[c] + MMp[c] + MMbndp[c]                  | -1000 | 1000 | 246277.1 or 14415.1 or 14417.1 or 14415.2                                                                    | Moose metabolic/transport demand reaction |
| MMlLDH_Lm       | MMbnd[m] + MMlald-L[m] -> MMb[m] + MMbndp[m] + MMlald-L[m]             | -1000 | 1000 | 52815.1 or 52815.2                                                                                           | Moose metabolic/transport demand reaction |
| MMlLDHATB0c     | MMbso-L[e] + 2 MMna[e] + MM-L[e] -> 2 MMna[e] + MMbso-L[e] + MM-L[e]   | 0     | 1000 | 16828.1                                                                                                      | Moose metabolic/transport demand reaction |
| MMlLDHATB0c     | MMbso-L[e] + MMna[e] -> MMna[e] + MMbso-L[e]                           | 0     | 1000 | 56774.1                                                                                                      | Moose metabolic/transport demand reaction |
| MMlLDHGLYHY     | MMb2[c] + MMbngly[c] -> MMbso-L[e] + MMbngly[c]                        | -1000 | 1000 | 70008.1 or 41338.1 and 57394.1                                                                               | Moose metabolic/transport demand reaction |
| MMlLDHGLYHYPT1c | MMb[e] + MMbngly[c] -> MMb[e] + MMbngly[c]                             | 0     | 1000 |                                                                                                              | Moose metabolic/transport demand reaction |
| MMlLDHGLY1c     | MMb[e] + MMbngly[c] -> MMb[c] + MMbngly[c]                             | 0     | 1000 | 215335.1                                                                                                     | Moose metabolic/transport demand reaction |
| MMlLDHLEATz6    | MMbso-L[e] + MMbso-L[e] -> MMbso-L[e] + MMbso-L[e]                     | -1000 | 1000 |                                                                                                              | Moose metabolic/transport demand reaction |
| MMlLDHKTzA6     | MMbndp[A[e]] -> MMbndp[A[e]]                                           | 0     | 1000 | 20539.1 and 17254.1                                                                                          | Moose metabolic/transport demand reaction |
| MMlLDHKTzA6r    | MMbndp[A[e]] -> MMbndp[A[e]]                                           | -1000 | 1000 |                                                                                                              | Moose metabolic/transport demand reaction |
| MMlLDHKTzB4     | MMbndp[B4[e]] -> MMbndp[B4[e]]                                         | 0     | 1000 |                                                                                                              | Moose metabolic/transport demand reaction |
| MMlLDHKTzB4r    | MMbndp[B4[e]] -> MMbndp[B4[e]]                                         | -1000 | 1000 |                                                                                                              | Moose metabolic/transport demand reaction |
| MMlLDHKTzD4     | MMbndp[D4[e]] -> MMbndp[D4[e]]                                         | 0     | 1000 |                                                                                                              | Moose metabolic/transport demand reaction |
| MMlLDHKTzD4r    | MMbndp[D4[e]] -> MMbndp[D4[e]]                                         | -1000 | 1000 |                                                                                                              | Moose metabolic/transport demand reaction |
| MMlLDHKTzE6     | MMbndp[E6[e]] -> MMbndp[E6[e]]                                         | 0     | 1000 |                                                                                                              | Moose metabolic/transport demand reaction |
| MMlLDHKTzE6r    | MMbndp[E6[e]] -> MMbndp[E6[e]]                                         | 0     | 1000 |                                                                                                              | Moose metabolic/transport demand reaction |
| MMlLDHLEAPc     | MMb2[c] + MMbndp[c] -> 2 MMbso-L[e]                                    | -1000 | 1000 |                                                                                                              | Moose metabolic/transport demand reaction |
| MMlLDHLEPPT1c   | MMb[e] + MMbndp[c] -> MMb[c] + MMbndp[c]                               | 0     | 1000 | 66988.1                                                                                                      | Moose metabolic/transport demand reaction |
| MMlLDHLEU3      | MMb[c] + MMbndp[c] -> MMb[c] + MMbndp[c]                               | 0     | 1000 | 215335.1                                                                                                     | Moose metabolic/transport demand reaction |
| MMlLDHLEATz6c   | MMbso-L[e] + MMbso-L[e] -> MMbso-L[e] + MMbso-L[e]                     | -1000 | 1000 |                                                                                                              | Moose metabolic/transport demand reaction |
| MMlLDHLEU7A     | MMak[g] + MMbso-L[e] -> MMg6-L[e] + MMbndp[c]                          | -1000 | 1000 | 20539.1 and 17254.1                                                                                          | Moose metabolic/transport demand reaction |
| MMlLDHLEU7Am    | MMak[m] + MMbso-L[m] -> MMg6-L[m] + MMbndp[m]                          | -1000 | 1000 | 12035.1                                                                                                      | Moose metabolic/transport demand reaction |
| MMlLDHLEU34     | MMna[e] + MMbso-L[e] -> MMna[e] + MMbso-L[e]                           | 0     | 1000 | 12036.1                                                                                                      | Moose metabolic/transport demand reaction |
| MMlLDHLEU35m    | MMbso-L[e] -> MMbso-L[m]                                               | -1000 | 1000 | 105727.1 or 67760.1 or 69354.1 or 56774.1 or 11989.1 or 1198                                                 |                                           |

|                |                                                              |       |      |                                                                                                                                        |                                              |
|----------------|--------------------------------------------------------------|-------|------|----------------------------------------------------------------------------------------------------------------------------------------|----------------------------------------------|
| MMLP5          | MMh2o[c] + MMmg_ho[c] -> MMh[c] + MMh2oatl[c] + MMmg_ho[c]   | 0     | 1000 | 19193.1                                                                                                                                | Mouse metabolic/transport demand<br>reaction |
| MMLP52         | MMh2o[c] + MMmg_ho[c] -> MMh[c] + MMh2oatl[c] + MMmg_ho[c]   | 0     | 1000 | 16956.1                                                                                                                                | Mouse metabolic/transport demand<br>reaction |
| MMLP52e        | MMh2o[c] + MMmg_ho[c] -> MMh[c] + MMh2oatl[c] + MMmg_ho[c]   | 0     | 1000 | 16956.1                                                                                                                                | Mouse metabolic/transport demand<br>reaction |
| MMLP53         | MMh2o[c] + MMmg_ho[c] -> MMh[c] + MMh2oatl[c] + MMmg_ho[c]   | 0     | 1000 | 15450.1                                                                                                                                | Mouse metabolic/transport demand<br>reaction |
| MMLP53e        | MMh2o[c] + MMmg_ho[c] -> MMh[c] + MMh2oatl[c] + MMmg_ho[c]   | 0     | 1000 | 23945.1 or 23945.2                                                                                                                     | Mouse metabolic/transport demand<br>reaction |
| MMLP54e        | MMh2o[c] + MMmg_ho[c] -> MMh[c] + MMh2oatl[c] + MMmg_ho[c]   | 0     | 1000 | 15450.1                                                                                                                                | Mouse metabolic/transport demand<br>reaction |
| MMLP5e         | MMh2o[c] + MMmg_ho[c] -> MMh[c] + MMh2oatl[c] + MMmg_ho[c]   | 0     | 1000 | 237625.1                                                                                                                               | Mouse metabolic/transport demand<br>reaction |
| MMLEAT         | MMpchl_ho[c] + MMmeteo_cw[1] -> MMpchl_ho[c] + MMmeteo_cw[1] | 0     | 1000 | 16891.1 or 67717.1 or 69060.1 or 18946.1 or 15450.1 or 18947.1                                                                         | Mouse metabolic/transport demand<br>reaction |
| MMLEAT1        | MMpchl_ho[c] + MMmeteo_cw[1] -> MMpchl_ho[c] + MMmeteo_cw[1] | 0     | 1000 | 79235.1                                                                                                                                | Mouse metabolic/transport demand<br>reaction |
| MMLEAT2        | MMpchl_ho[c] + MMmeteo_cw[1] -> MMpchl_ho[c] + MMmeteo_cw[1] | 0     | 1000 |                                                                                                                                        | Mouse metabolic/transport demand<br>reaction |
| MMLS3          | MMp2[c] -> MMh2o[c]                                          | -1000 | 1000 |                                                                                                                                        | Mouse metabolic/transport demand<br>reaction |
| MMLS101r       | MMh2o[c] + MMh[c] -> MMh2o[c] + MMh[c]                       | 0     | 1000 |                                                                                                                                        | Mouse metabolic/transport demand<br>reaction |
| MMLS102r       | MMh2o[c] + MMh[c] -> MMh2o[c] + MMh[c]                       | 0     | 1000 | 235293.1                                                                                                                               | Mouse metabolic/transport demand<br>reaction |
| MMLETAH        | MMh2o[c] + MMmeteo_cw[1] -> MMh2o[c] + MMmeteo_cw[1]         | 0     | 1000 | 235293.1                                                                                                                               | Mouse metabolic/transport demand<br>reaction |
| MMLETC4CP      | MMh2o[c] + MMmeteo_cw[1] -> MMh2o[c] + MMmeteo_cw[1]         | -1000 | 1000 | 16993.1                                                                                                                                | Mouse metabolic/transport demand<br>reaction |
| MMLETC4Sr      | MMh2o[c] + MMmeteo_cw[1] -> MMh2o[c] + MMmeteo_cw[1]         | 0     | 1000 |                                                                                                                                        | Mouse metabolic/transport demand<br>reaction |
| MMLETD4P       | MMh2o[c] + MMmeteo_cw[1] -> MMh2o[c] + MMmeteo_cw[1]         | -1000 | 1000 | 17001.1 or 17001.2 or 21166.1 or 66447.1                                                                                               | Mouse metabolic/transport demand<br>reaction |
| MMLETDCL       | MMh[c] + MMh[c] -> MMh[c] + MMh[c]                           | 0     | 1000 |                                                                                                                                        | Mouse metabolic/transport demand<br>reaction |
| MMLYSALuBAtc   | MMh[c] + MMh[c] -> MMh[c] + MMh[c]                           | 0     | 1000 | 13195.1                                                                                                                                | Mouse metabolic/transport demand<br>reaction |
| MMLYSATB0u     | 2 MMh[c] + MMh[c] -> 2 MMh[c] + MMh[c]                       | 0     | 1000 | (30962.1 and 20532.1)                                                                                                                  | Mouse metabolic/transport demand<br>reaction |
| MMLYSLuBAtc    | MMh[c] + MMh[c] -> MMh[c] + MMh[c]                           | 0     | 1000 | 56774.1                                                                                                                                | Mouse metabolic/transport demand<br>reaction |
| MMLYSMTF1a     | MMh[c] + MMh[c] -> MMh[c] + MMh[c]                           | 0     | 1000 | (30962.1 and 20532.1)                                                                                                                  | Mouse metabolic/transport demand<br>reaction |
| MMLYSMTF2a     | MMh[c] + MMh[c] -> MMh[c] + MMh[c]                           | 0     | 1000 | 239122.1 or 77683.1 or 110147.1 or 231051.1 or 67956.1 or 73251.1 or 64707.1 or 110147.2 or 208266.1 or 84505.1 or 231051.2 or 20937.1 | Mouse metabolic/transport demand<br>reaction |
| MMLYSMTF3a     | MMh[c] + MMh[c] -> MMh[c] + MMh[c]                           | 0     | 1000 | 239122.1 or 77683.1 or 110147.1 or 231051.1 or 67956.1 or 73251.1 or 64707.1 or 110147.2 or 208266.1 or 84505.1 or 231051.2 or 20937.1 | Mouse metabolic/transport demand<br>reaction |
| MMLYSOXp       | MMh[c] + MMh[c] -> MMh[c] + MMh[c]                           | 0     | 1000 | 239122.1 or 77683.1 or 110147.1 or 231051.1 or 67956.1 or 73251.1 or 64707.1 or 110147.2 or 208266.1 or 84505.1 or 231051.2 or 20937.1 | Mouse metabolic/transport demand<br>reaction |
| MMLYS4         | MMh[c] + MMh[c] -> MMh[c] + MMh[c]                           | 0     | 1000 |                                                                                                                                        | Mouse metabolic/transport demand<br>reaction |
| MMLYS4e        | MMh[c] + MMh[c] -> MMh[c] + MMh[c]                           | -1000 | 1000 | 56774.1 or 20520.1                                                                                                                     | Mouse metabolic/transport demand<br>reaction |
| MMLYS4DF       | MMh[c] + MMh[c] -> MMh[c] + MMh[c]                           | 0     | 1000 | 11987.1                                                                                                                                | Mouse metabolic/transport demand<br>reaction |
| MMLYSip        | MMh[c] + MMh[c] -> MMh[c] + MMh[c]                           | 0     | 1000 | 69354.1 or 11989.1 or 11988.1 or 11987.1                                                                                               | Mouse metabolic/transport demand<br>reaction |
| MMLYSnm        | MMh[c] + MMh[c] -> MMh[c] + MMh[c]                           | -1000 | 1000 |                                                                                                                                        | Mouse metabolic/transport demand<br>reaction |
| MMLYSnm        | MMh[c] + MMh[c] -> MMh[c] + MMh[c]                           | -1000 | 1000 | 18408.1 or 83885.1                                                                                                                     | Mouse metabolic/transport demand<br>reaction |
| MM_LACDcm      | 2 MMh[c] + MMh[c] -> 2 MMh[c] + MMh[c]                       | 0     | 1000 |                                                                                                                                        | Mouse metabolic/transport demand<br>reaction |
| MM_LAC2r       | MMh[c] + MMh[c] -> MMh[c] + MMh[c]                           | 0     | 1000 | 626571.1                                                                                                                               | Mouse metabolic/transport demand<br>reaction |
| MM_LAC4r       | MMh[c] + MMh[c] -> MMh[c] + MMh[c]                           | 0     | 1000 | 20503.1 or 80879.1 or 20501.1 or 57274.1                                                                                               | Mouse metabolic/transport demand<br>reaction |
| MM_LACcm       | MMh[c] + MMh[c] -> MMh[c] + MMh[c]                           | 0     | 0    |                                                                                                                                        | Mouse metabolic/transport demand<br>reaction |
| MM_LACm        | MMh[c] + MMh[c] -> MMh[c] + MMh[c]                           | 0     | 0    | 64008.1                                                                                                                                | Mouse metabolic/transport demand<br>reaction |
| MMM1316Mg      | 2 MMh2o[c] + MMh2oatl[c] -> 2 MMh2o[c] + MMh2oatl[c]         | 0     | 1000 | 20501.1                                                                                                                                | Mouse metabolic/transport demand<br>reaction |
| MMM13N2Tg      | MMh2o[c] + MMh2oatl[c] -> MMh2o[c] + MMh2oatl[c]             | 0     | 1000 | 17158.1 or 140481.1                                                                                                                    | Mouse metabolic/transport demand<br>reaction |
| MMM13N4Tg      | MMh2o[c] + MMh2oatl[c] -> MMh2o[c] + MMh2oatl[c]             | 0     | 1000 | 17308.1                                                                                                                                | Mouse metabolic/transport demand<br>reaction |
| MMM14N2Tg      | MMh2o[c] + MMh2oatl[c] -> MMh2o[c] + MMh2oatl[c]             | 0     | 1000 | 103534.1 or 269181.1 or 103534.2                                                                                                       | Mouse metabolic/transport demand<br>reaction |
| MMM16N4Tg      | MMh2o[c] + MMh2oatl[c] -> MMh2o[c] + MMh2oatl[c]             | 0     | 1000 | 17309.1                                                                                                                                | Mouse metabolic/transport demand<br>reaction |
| MMM16N6Tg      | MMh2o[c] + MMh2oatl[c] -> MMh2o[c] + MMh2oatl[c]             | 0     | 1000 |                                                                                                                                        | Mouse metabolic/transport demand<br>reaction |
| MMM16N8Tg      | MMh2o[c] + MMh2oatl[c] -> MMh2o[c] + MMh2oatl[c]             | 0     | 1000 | 107895.1                                                                                                                               | Mouse metabolic/transport demand<br>reaction |
| MMM14TAer      | MMh2o[c] + MMh2oatl[c] -> MMh2o[c] + MMh2oatl[c]             | 0     | 1000 | 217664.1                                                                                                                               | Mouse metabolic/transport demand<br>reaction |
| MMM4HE72er     | MMh2o[c] + MMh2oatl[c] -> MMh2o[c] + MMh2oatl[c]             | 0     | 1000 | 276846.1 or 228812.1 or 14731.1 or 329777.1                                                                                            | Mouse metabolic/transport demand<br>reaction |
| MMM4BTAr       | MMh2o[c] + MMh2oatl[c] -> MMh2o[c] + MMh2oatl[c]             | 0     | 1000 | 18701.1 or 433931.1 or 18701.2                                                                                                         | Mouse metabolic/transport demand<br>reaction |
| MMM4CT3er      | MMh2o[c] + MMh2oatl[c] -> MMh2o[c] + MMh2oatl[c]             | 0     | 1000 | 276846.1 or 78928.1 or 228812.1 or 14731.1 or 329777.1                                                                                 | Mouse metabolic/transport demand<br>reaction |
| MMM4MPDOL_1ier | MMh2o[c] + MMh2oatl[c] -> MMh2o[c] + MMh2oatl[c]             | 0     | 1000 | 56703.1 or 18701.1 or 18701.2 or 56703.2                                                                                               | Mouse metabolic/transport demand<br>reaction |
| MMM4MPDOL_3ier | MMh2o[c] + MMh2oatl[c] -> MMh2o[c] + MMh2oatl[c]             | 0     | 1000 |                                                                                                                                        | Mouse metabolic/transport demand<br>reaction |
| MMM7MASNBerg   | MMh2o[c] + MMh2oatl[c] -> MMh2o[c] + MMh2oatl[c]             | 0     | 1000 |                                                                                                                                        | Mouse metabolic/transport demand<br>reaction |
| MMM8MASNerg    | MMh2o[c] + MMh2oatl[c] -> MMh2o[c] + MMh2oatl[c]             | 0     | 1000 |                                                                                                                                        | Mouse metabolic/transport demand<br>reaction |
| MMMACACT       | MMh2o[c] + MMh2oatl[c] -> MMh2o[c] + MMh2oatl[c]             | 0     | 1000 |                                                                                                                                        | Mouse metabolic/transport demand<br>reaction |
| MMMACOXO       | MMh2o[c] + MMh2oatl[c] -> MMh2o[c] + MMh2oatl[c]             | 0     | 1000 | 14874.2 or 14874.3 or 14874.1                                                                                                          | Mouse metabolic/transport demand<br>reaction |
| MMMACGSTBh     | MMh2o[c] + MMh2oatl[c] -> MMh2o[c] + MMh2oatl[c]             | -1000 | 1000 | 109731.1 or 11670.1 or 67689.1 or 56847.1                                                                                              | Mouse metabolic/transport demand<br>reaction |
| MMMACr         | MMh2o[c] + MMh2oatl[c] -> MMh2o[c] + MMh2oatl[c]             | -1000 | 1000 |                                                                                                                                        | Mouse metabolic/transport demand<br>reaction |
| MMMALSO3m      | MMh2o[c] + MMh2oatl[c] -> MMh2o[c] + MMh2oatl[c]             | -1000 | 1000 |                                                                                                                                        | Mouse metabolic/transport demand<br>reaction |
| MMMALSO4m      | MMh2o[c] + MMh2oatl[c] -> MMh2o[c] + MMh2oatl[c]             | -1000 | 1000 | 27376.1                                                                                                                                | Mouse metabolic/transport demand<br>reaction |
| MMMALT         | MMh2o[c] + MMh2oatl[c] -> MMh2o[c] + MMh2oatl[c]             | 0     | 1000 | 27376.1                                                                                                                                | Mouse metabolic/transport demand<br>reaction |
| MMMALTSU3m     | MMh2o[c] + MMh2oatl[c] -> MMh2o[c] + MMh2oatl[c]             | -1000 | 1000 | 76051.1                                                                                                                                | Mouse metabolic/transport demand<br>reaction |
| MMMALTe        | MMh2o[c] + MMh2oatl[c] -> MMh2o[c] + MMh2oatl[c]             | 0     | 1000 | 27376.1                                                                                                                                | Mouse metabolic/transport demand<br>reaction |
| MMMALTy        | MMh2o[c] + MMh2oatl[c] -> MMh2o[c] + MMh2oatl[c]             | 0     | 1000 | 232714.1                                                                                                                               | Mouse metabolic/transport demand<br>reaction |
| MMMALTr        | MMh2o[c] + MMh2oatl[c] -> MMh2o[c] + MMh2oatl[c]             | 0     | 1000 | 14387.1                                                                                                                                | Mouse metabolic/transport demand<br>reaction |
| MMMALm         | MMh2o[c] + MMh2oatl[c] -> MMh2o[c] + MMh2oatl[c]             | -1000 | 1000 | 20527.1                                                                                                                                | Mouse metabolic/transport demand<br>reaction |
| MMMAN1PT2      | MMh2o[c] + MMh2oatl[c] -> MMh2o[c] + MMh2oatl[c]             | 0     | 1000 | 27376.1                                                                                                                                | Mouse metabolic/transport demand<br>reaction |
| MMMAN1_6B1er   | MMh2o[c] + MMh2oatl[c] -> MMh2o[c] + MMh2oatl[c]             | 0     | 1000 | 331026.1 or 331026.2 or 69080.1 or 69080.2                                                                                             | Mouse metabolic/transport demand<br>reaction |
| MMMAN1_7B1er   | MMh2o[c] + MMh2oatl[c] -> MMh2o[c] + MMh2oatl[c]             | 0     | 1000 | 227619.1                                                                                                                               | Mouse metabolic/transport demand<br>reaction |
| MMMAN2_6B1er   | MMh2o[c] + MMh2oatl[c] -> MMh2o[c] + MMh2oatl[c]             | 0     | 1000 | 227619.1                                                                                                                               | Mouse metabolic/transport demand<br>reaction |
| MMMAN2_7C1er   | MMh2o[c] + MMh2oatl[c] -> MMh2o[c] + MMh2oatl[c]             | 0     | 1000 |                                                                                                                                        | Mouse metabolic/transport demand<br>reaction |
| MMMAN6P1       | MMh2o[c] + MMh2oatl[c] -> MMh2o[c] + MMh2oatl[c]             | -1000 | 1000 |                                                                                                                                        | Mouse metabolic/transport demand<br>reaction |
| MMMAN6Tr       | MMh2o[c] + MMh2oatl[c] -> MMh2o[c] + MMh2oatl[c]             | 0     | 1000 | 110119.1                                                                                                                               | Mouse metabolic/transport demand<br>reaction |
| MMMAN4N        | MMh2o[c] + MMh2oatl[c] -> MMh2o[c] + MMh2oatl[c]             | -1000 | 1000 | 20527.1 or 20525.1 or 20526.1                                                                                                          | Mouse metabolic/transport demand<br>reaction |
| MMMANer        | MMh2o[c] + MMh2oatl[c] -> MMh2o[c] + MMh2oatl[c]             | 0     | 1000 | 230612.1                                                                                                                               | Mouse metabolic/transport demand<br>reaction |
| MMMANg         | MMh2o[c] + MMh2oatl[c] -> MMh2o[c] + MMh2oatl[c]             | 0     | 1000 |                                                                                                                                        | Mouse metabolic/transport demand<br>reaction |
| MMMANy         | MMh2o[c] + MMh2oatl[c] -> MMh2o[c] + MMh2oatl[c]             | 0     | 1000 |                                                                                                                                        | Mouse metabolic/transport demand<br>reaction |
| MMMACILNOR     | MMh2o[c] + MMh2oatl[c] -> MMh2o[c] + MMh2oatl[c]             | 0     | 1000 |                                                                                                                                        | Mouse metabolic/transport demand<br>reaction |
| MMMAOX         | MMh2o[c] + MMh2oatl[c] -> MMh2o[c] + MMh2oatl[c]             | 0     | 1000 | 109731.1 or 17161.1                                                                                                                    | Mouse metabolic/transport demand<br>reaction |
| MMMACCCm       | MMh2o[c] + MMh2oatl[c] -> MMh2o[c] + MMh2oatl[c]             | -1000 | 1000 | 237940.1 or 237940.2 or 11754.1 or 76507.1                                                                                             | Mouse metabolic/transport demand<br>reaction |
| MMMCD          | MMh2o[c] + MMh2oatl[c] -> MMh2o[c] + MMh2oatl[c]             | 0     | 1000 | 72019.1 and 78038.1                                                                                                                    | Mouse metabolic/transport demand<br>reaction |
| MMMCDm         | MMh2o[c] + MMh2oatl[c] -> MMh2o[c] + MMh2oatl[c]             | 0     | 1000 | 56690.1                                                                                                                                | Mouse metabolic/transport demand<br>reaction |
| MMMCTp         | MMh2o[c] + MMh2oatl[c] -> MMh2o[c] + MMh2oatl[c]             | 0     | 1000 | 56690.1                                                                                                                                | Mouse metabolic/transport demand<br>reaction |
| MMMACTIS       | MMh2o[c] + MMh2oatl[c] -> MMh2o[c] + MMh2oatl[c]             | 0     | 1000 | 56690.1                                                                                                                                | Mouse metabolic/transport demand<br>reaction |
| MMMACTCYSR     | MMh2o[c] + MMh2oatl[c] -> MMh2o[c] + MMh2oatl[c]             | 0     | 1000 |                                                                                                                                        | Mouse metabolic/transport demand<br>reaction |
| MMMACTA        | MMh2o[c] + MMh2oatl[c] -> MMh2o[c] + MMh2oatl[c]             | -1000 | 1000 |                                                                                                                                        | Mouse metabolic/transport demand<br>reaction |

|              |                                                                                                |       |      |                                                                                                      |                                              |
|--------------|------------------------------------------------------------------------------------------------|-------|------|------------------------------------------------------------------------------------------------------|----------------------------------------------|
| MMMCOATAm    | $MMmksa[n] + MMACP[n] \rightleftharpoons MMco[n] + MMmdaCP[n]$                                 | -1000 | 1000 | 14104.1                                                                                              | Mouse metabolic/transport demand<br>reaction |
| MMMCPST      | $MMcys[n] + MMmergpy[c] \rightarrow MMh[c] + MMp[c] + MMvc[n]$                                 | 0     | 1000 | 23722.1 or 23722.2                                                                                   | Mouse metabolic/transport demand<br>reaction |
| MMMDH        | $MMmd[c] + MMmal-Lj[c] \rightleftharpoons MMh[c] + MMmdh[c] + MMoa[c]$                         | -1000 | 1000 | 24622.1                                                                                              | Mouse metabolic/transport demand<br>reaction |
| MMMDHm       | $MMmd[n] + MMmal-Lj[n] \rightleftharpoons MMh[n] + MMmdh[n] + MMoa[n]$                         | -1000 | 1000 | 76668.1 or 17449.1                                                                                   | Mouse metabolic/transport demand<br>reaction |
| MMMDRPD      | $MMmdnp[c] \rightarrow MMbz[c] + MMdnp[c]$                                                     | 0     | 1000 | 17448.1                                                                                              | Mouse metabolic/transport demand<br>reaction |
| MMME1m       | $MMmd[n] + MMmal-Lj[n] \rightarrow MMco2[n] + MMmdh[n] + MMv[n]$                               | 0     | 1000 |                                                                                                      | Mouse metabolic/transport demand<br>reaction |
| MMME2        | $MMmdp[c] + MMmal-Lj[c] \rightarrow MMp[c] + MMmdp[c] + MMco2[c]$                              | 0     | 1000 | 107029.1                                                                                             | Mouse metabolic/transport demand<br>reaction |
| MMME2m       | $MMmdp[n] + MMmal-Lj[n] \rightarrow MMp[n] + MMmdp[n] + MMco2[n] + MMv[n]$                     | 0     | 1000 | 17436.1                                                                                              | Mouse metabolic/transport demand<br>reaction |
| MMMECOALm    | $MMco[n] + MMarg[n] + MMmcsa[n] \rightleftharpoons MMdp[n] + MMp[n] + MMmcsa[n]$               | -1000 | 1000 | 107029.1 or 109264.1                                                                                 | Mouse metabolic/transport demand<br>reaction |
| MMMECOAS1m   | $MMco[n] + MMarg[n] + MMmcsa[n] \rightleftharpoons MMdp[n] + MMdp[n] + MMmcsa[n]$              | -1000 | 1000 | 56451.1 and 20916.1                                                                                  | Mouse metabolic/transport demand<br>reaction |
| MMMLATN2DOX  | $MMbz[c] + MMmeha[c] \rightarrow MMmstam[c]$                                                   | 0     | 1000 | 20917.1 and 56451.1                                                                                  | Mouse metabolic/transport demand<br>reaction |
| MMMLATNOX    | $MMbz[c] + MMh[c] + MMmdp[c] + MMmeha[c] \rightarrow MMbz[c] + MMmdp[c] + MMmstam[c]$          | 0     | 1000 | 15930.1                                                                                              | Mouse metabolic/transport demand<br>reaction |
| MMMEOR2      | $MMmeha[c] \rightleftharpoons MMmeha[c]$                                                       | 0     | 1000 | 404195.1 or 13078.1 or 13077.1 or 13076.1                                                            | Mouse metabolic/transport demand<br>reaction |
| MMMEORHy     | $MMmeha[c] \rightleftharpoons MMmeha[c]$                                                       | -1000 | 1000 |                                                                                                      | Mouse metabolic/transport demand<br>reaction |
| MMMEORHr     | $MMmeha[c] \rightleftharpoons MMmeha[c]$                                                       | -1000 | 1000 |                                                                                                      | Mouse metabolic/transport demand<br>reaction |
| MMMEPVESu    | $2 MMbz[c] + 2 MMarg[c] + 3 MMarg[c] \rightarrow 2 MMdp[c] + 2 MMh[c] + 2 MMp[c] + 3 MMarg[c]$ | 0     | 1000 |                                                                                                      | Mouse metabolic/transport demand<br>reaction |
| MMMERCLACCYS | $MMmergpcy[c] \rightarrow MMmergpcy[c]$                                                        | 0     | 1000 |                                                                                                      | Mouse metabolic/transport demand<br>reaction |
| MMMESCOALm   | $MMbz[n] + MMmcsa[n] \rightarrow MMp[n] + MMmcsa[n]$                                           | 0     | 1000 |                                                                                                      | Mouse metabolic/transport demand<br>reaction |
| MMMETAT      | $MMbz[c] + MMarg[c] + MMmcsa[c] \rightarrow MMp[c] + MMmcsa[c] + MMmetat[c]$                   | 0     | 1000 |                                                                                                      | Mouse metabolic/transport demand<br>reaction |
| MMMETAT90u   | $2 MMmal-Lj + MMc[c] + MMmcsa-Lj[n] \rightarrow 2 MMmal-Lj + MMc[c] + MMmcsa-Lj$               | 0     | 1000 | (232087.1 and 108645.1) or (108645.2 and 232087.1) or 11720.1                                        | Mouse metabolic/transport demand<br>reaction |
| MMMETBATAc   | $MMmal-Lj + MMmet-Lj[n] \rightarrow MMmal-Lj + MMmet-Lj$                                       | 0     | 1000 | 56774.1                                                                                              | Mouse metabolic/transport demand<br>reaction |
| MMMETLJL172u | $MMbz-Lj[c] + MMmet-Lj[c] \rightarrow MMbz-Lj[c] + MMmet-Lj[c]$                                | 0     | 1000 | (7008.1 or 74338.1 and 57394.1)                                                                      | Mouse metabolic/transport demand<br>reaction |
| MMMETLAT1u   | $MMbz-Lj[c] + MMmet-Lj[n] \rightarrow MMbz-Lj[c] + MMmet-Lj[c]$                                | 0     | 1000 | (20339.1 and 17254.1)                                                                                | Mouse metabolic/transport demand<br>reaction |
| MMMETLJL1u   | $MMbz-Lj[c] + MMmet-Lj[c] \rightarrow MMbz-Lj[c] + MMmet-Lj[c]$                                | 0     | 1000 | (20339.1 and 17254.1)                                                                                | Mouse metabolic/transport demand<br>reaction |
| MMMETPHLAT2u | $MMp[c] + MMmet-Lj[c] \rightarrow MMp[c] + MMmet-Lj[c]$                                        | 0     | 1000 | 17254.1 and 20339.1                                                                                  | Mouse metabolic/transport demand<br>reaction |
| MMMETTS      | $MMmeha[c] + MMcys-Lj[c] \rightarrow MMh[c] + MMh[c] + MMmcsa-Lj[c]$                           | 0     | 1000 | (20339.1 and 17254.1)                                                                                | Mouse metabolic/transport demand<br>reaction |
| MMMETW       | $MMmal-Lj + MMmet-Lj[c] \rightarrow MMmal-Lj + MMmet-Lj[c]$                                    | 0     | 1000 | 238505.1                                                                                             | Mouse metabolic/transport demand<br>reaction |
| MMMETWc      | $MMmet-Lj[c] \rightleftharpoons MMmet-Lj[c]$                                                   | 0     | 1000 | 105727.1 or 67760.1 or 56774.1 or 20520.1                                                            | Mouse metabolic/transport demand<br>reaction |
| MMMETYLATu   | $MMmal-Lj + MMarg-Lj[c] + MMmet-Lj[c] \rightarrow MMmal-Lj + MMarg-Lj[c] + MMmet-Lj[c]$        | 0     | 1000 | 215113.1 or 72401.1                                                                                  | Mouse metabolic/transport demand<br>reaction |
| MMMETYLATu   | $MMh[c] + MMarg-Lj[c] + MMmet-Lj[c] \rightarrow MMh[c] + MMarg-Lj[c] + MMmet-Lj[c]$            | 0     | 1000 | (20540.1 or 330836.1 and 17254.1)                                                                    | Mouse metabolic/transport demand<br>reaction |
| MMMEVEX1u    | $MMarg[c] + MMmcsa-Lj[c] \rightarrow MMh[c] + MMmcsa-Lj[c]$                                    | 0     | 1000 | (20540.1 or 330836.1 and 17254.1)                                                                    | Mouse metabolic/transport demand<br>reaction |
| MMMGier      | $MMbz[c] + MMg2mcsa[c] \rightarrow MMg-Dj + MMg2mcsa[c]$                                       | 0     | 1000 | 17855.1                                                                                              | Mouse metabolic/transport demand<br>reaction |
| MMMG2er      | $MMbz[c] + MMg2mcsa[c] \rightarrow MMg-Dj + MMg2mcsa[c]$                                       | 0     | 1000 | 57377.1                                                                                              | Mouse metabolic/transport demand<br>reaction |
| MMMG2er      | $MMbz[c] + MMg2mcsa[c] \rightarrow MMg-Dj + MMg2mcsa[c]$                                       | 0     | 1000 |                                                                                                      | Mouse metabolic/transport demand<br>reaction |
| MMMGACONu    | $MMmcsa-Lj[n] \rightleftharpoons MMbz[n] + MMmcsa[n]$                                          | -1000 | 1000 |                                                                                                      | Mouse metabolic/transport demand<br>reaction |
| MMMGCTm      | $MMbz[n] + MMmcsa[n] \rightleftharpoons MMbz[n] + MMmcsa[n]$                                   | -1000 | 1000 |                                                                                                      | Mouse metabolic/transport demand<br>reaction |
| MMMGSA       | $MMdp[c] \rightarrow MMp[c] + MMmdh[c]$                                                        | 0     | 1000 | 11992.1                                                                                              | Mouse metabolic/transport demand<br>reaction |
| MMMGSA2      | $MMdp[c] \rightarrow MMp[c] + MMmdh[c]$                                                        | 0     | 1000 |                                                                                                      | Mouse metabolic/transport demand<br>reaction |
| MMMHISOR     | $MMbz[c] + MMmcsa[n] \rightleftharpoons MMbz[c] + MMmcsa[n] + MMmcsa[n]$                       | 0     | 1000 |                                                                                                      | Mouse metabolic/transport demand<br>reaction |
| MMMI1345PK   | $MMarg[c] + MMmal345p[c] \rightarrow MMdp[c] + MMh[c] + MMmdh[c]$                              | 0     | 1000 | 237940.1 or 237940.2 or 1754.1 or 76507.1                                                            | Mouse metabolic/transport demand<br>reaction |
| MMMI1345Pm   | $MMmal345p[c] \rightleftharpoons MMmal345p[n]$                                                 | -1000 | 1000 |                                                                                                      | Mouse metabolic/transport demand<br>reaction |
| MMMI1345Pn   | $MMarg[n] + MMmal345p[n] \rightarrow MMh[n] + MMdp[n] + MMmal345p[n]$                          | 0     | 1000 |                                                                                                      | Mouse metabolic/transport demand<br>reaction |
| MMMI1345PP   | $MMbz[c] + MMmal345p[c] \rightarrow MMp[c] + MMmal34p[c]$                                      | 0     | 1000 | 69718.1                                                                                              | Mouse metabolic/transport demand<br>reaction |
| MMMI134PKa   | $MMarg[n] + MMmal34p[n] \rightarrow MMh[n] + MMdp[n] + MMmal34p[n]$                            | 0     | 1000 | 104015.1 or 170835.1 or 170835.1 or 16331.1 or 212111.1 or 64436.1 or 16330.1 or 16332.1 or 104015.2 | Mouse metabolic/transport demand<br>reaction |
| MMMI134Pm    | $MMmal34p[c] \rightleftharpoons MMmal34p[n]$                                                   | -1000 | 1000 | 69718.1                                                                                              | Mouse metabolic/transport demand<br>reaction |
| MMMI134P4P   | $MMbz[c] + MMmal34p[c] \rightarrow MMp[c] + MMmal3p[c]$                                        | 0     | 1000 |                                                                                                      | Mouse metabolic/transport demand<br>reaction |
| MMMI134PK    | $MMarg[c] + MMmal34p[c] \rightarrow MMdp[c] + MMh[c] + MMmal34p[c]$                            | 0     | 1000 |                                                                                                      | Mouse metabolic/transport demand<br>reaction |
| MMMI134PP    | $MMbz[c] + MMmal34p[c] \rightarrow MMp[c] + MMmal34p[c]$                                       | 0     | 1000 | 16329.1                                                                                              | Mouse metabolic/transport demand<br>reaction |
| MMMI134PK    | $MMarg[n] + MMmal34p[n] \rightarrow MMh[n] + MMdp[n] + MMmal34p[n]$                            | 0     | 1000 |                                                                                                      | Mouse metabolic/transport demand<br>reaction |
| MMMI134PKa   | $MMarg[n] + MMmal34p[n] \rightarrow MMh[n] + MMdp[n] + MMmal34p[n]$                            | 0     | 1000 | 69718.1                                                                                              | Mouse metabolic/transport demand<br>reaction |
| MMMI134PKa   | $MMarg[n] + MMmal34p[n] \rightarrow MMh[n] + MMdp[n] + MMmal34p[n]$                            | 0     | 1000 | 228550.1 or 233011.1 or 320404.1                                                                     | Mouse metabolic/transport demand<br>reaction |
| MMMI134PP    | $MMbz[c] + MMmal34p[c] \rightarrow MMp[c] + MMmal34p[c]$                                       | 0     | 1000 | 69718.1                                                                                              | Mouse metabolic/transport demand<br>reaction |
| MMMI14P4P    | $MMbz[c] + MMmal34p[c] \rightarrow MMp[c] + MMmal34p[c]$                                       | 0     | 1000 | 104015.1 or 170835.1 or 170835.1 or 16331.1 or 212111.1 or 64436.1 or 16330.1 or 16332.1 or 104015.2 | Mouse metabolic/transport demand<br>reaction |
| MMMI14PP     | $MMbz[c] + MMmal34p[c] \rightarrow MMp[c] + MMmal34p[c]$                                       | 0     | 1000 |                                                                                                      | Mouse metabolic/transport demand<br>reaction |
| MMMI14Pm     | $MMmal34p[c] \rightleftharpoons MMmal34p[n]$                                                   | -1000 | 1000 | 16329.1                                                                                              | Mouse metabolic/transport demand<br>reaction |
| MMMI1PP      | $MMbz[c] + MMmal34p[c] \rightarrow MMp[c] + MMmal34p[c]$                                       | 0     | 1000 |                                                                                                      | Mouse metabolic/transport demand<br>reaction |
| MMMI1PS      | $MMarg[c] \rightarrow MMmal34p[c]$                                                             | 0     | 1000 | 114663.1 or 55980.1                                                                                  | Mouse metabolic/transport demand<br>reaction |
| MMMI1P-Du    | $MMmal34p[c] \rightleftharpoons MMmal34p[n]$                                                   | -1000 | 1000 | 71780.1                                                                                              | Mouse metabolic/transport demand<br>reaction |
| MMMI1345PK   | $MMarg[c] + MMmal34p[c] \rightarrow MMdp[c] + MMh[c] + MMmal34p[c]$                            | 0     | 1000 |                                                                                                      | Mouse metabolic/transport demand<br>reaction |
| MMMI14PP     | $MMbz[c] + MMmal34p[c] \rightarrow MMp[c] + MMmal34p[c]$                                       | 0     | 1000 |                                                                                                      | Mouse metabolic/transport demand<br>reaction |
| MMMI1PP      | $MMbz[c] + MMmal34p[c] \rightarrow MMp[c] + MMmal34p[c]$                                       | 0     | 1000 | 234515.1 or 269180.1 or 269180.2                                                                     | Mouse metabolic/transport demand<br>reaction |
| MMMI14PP     | $MMbz[c] + MMmal34p[c] \rightarrow MMp[c] + MMmal34p[c]$                                       | 0     | 1000 | 114663.1 or 55980.1                                                                                  | Mouse metabolic/transport demand<br>reaction |
| MMMI1CTD     | $MMbz[c] + MMmcsa[c] \rightleftharpoons MMmcsa[c]$                                             | -1000 | 1000 | 114663.1 or 55980.1                                                                                  | Mouse metabolic/transport demand<br>reaction |
| MMMI1N10Pm   | $MMmal34p[c] \rightleftharpoons MMmal34p[n]$                                                   | -1000 | 1000 |                                                                                                      | Mouse metabolic/transport demand<br>reaction |
| MMMK10       | $MMmal34p[c] \rightleftharpoons MMmal34p[n]$                                                   | -1000 | 1000 |                                                                                                      | Mouse metabolic/transport demand<br>reaction |
| MMMK11u      | $MMmal34p[c] \rightleftharpoons MMmal34p[n]$                                                   | -1000 | 1000 |                                                                                                      | Mouse metabolic/transport demand<br>reaction |
| MMMK11       | $MMmal34p[c] \rightleftharpoons MMmal34p[n]$                                                   | -1000 | 1000 |                                                                                                      | Mouse metabolic/transport demand<br>reaction |
| MMMK1u       | $MMmal34p[c] \rightleftharpoons MMmal34p[n]$                                                   | -1000 | 1000 |                                                                                                      | Mouse metabolic/transport demand<br>reaction |
| MMMK1u       | $MMmal34p[c] \rightleftharpoons MMmal34p[n]$                                                   | -1000 | 1000 |                                                                                                      | Mouse metabolic/transport demand<br>reaction |
| MMMLTGI      | $MMbz[c] + MMmcsa[c] \rightarrow MMg-Dj + MMmcsa[c]$                                           | 0     | 1000 |                                                                                                      | Mouse metabolic/transport demand<br>reaction |
| MMMLTGIc     | $MMbz[c] + MMmcsa[c] \rightarrow MMg-Dj + MMmcsa[c]$                                           | 0     | 1000 | 76051.1                                                                                              | Mouse metabolic/transport demand<br>reaction |
| MMMLTGIh     | $MMbz[c] + MMmcsa[c] \rightarrow MMg-Dj + MMmcsa[c]$                                           | 0     | 1000 | 232714.1                                                                                             | Mouse metabolic/transport demand<br>reaction |
| MMMD5ag      | $MMbz[c] + MMmcsa[c] \rightarrow MMmcsa[c] + MMmcsa[c]$                                        | 0     | 1000 | 14387.1                                                                                              | Mouse metabolic/transport demand<br>reaction |
| MMMD5hg      | $MMbz[c] + MMmcsa[c] \rightarrow MMmcsa[c] + MMmcsa[c]$                                        | 0     | 1000 | 17156.1 or 230815.1 or 17155.1                                                                       | Mouse metabolic/transport demand<br>reaction |
| MMMD5cg      | $MMbz[c] + MMmcsa[c] \rightarrow MMmcsa[c] + MMmcsa[c]$                                        | 0     | 1000 | 17156.1 or 230815.1 or 17155.1                                                                       | Mouse metabolic/transport demand<br>reaction |
| MMMD6B1ag    | $MMbz[c] + MMmcsa[c] \rightarrow MMmcsa[c] + MMmcsa[c]$                                        | 0     | 1000 | 17156.1 or 230815.1 or 17155.1                                                                       | Mouse metabolic/transport demand<br>reaction |
| MMMD6B1hg    | $MMbz[c] + MMmcsa[c] \rightarrow MMmcsa[c] + MMmcsa[c]$                                        | 0     | 1000 | 17156.1 or 230815.1 or 17155.1                                                                       | Mouse metabolic/transport demand<br>reaction |
| MMMD6B2g     | $MMbz[c] + MMmcsa[c] \rightarrow MMmcsa[c] + MMmcsa[c]$                                        | 0     | 1000 | 17156.1 or 230815.1 or 17155.1                                                                       | Mouse metabolic/transport demand<br>reaction |
| MMMD6ag      | $MMbz[c] + MMmcsa[c] \rightarrow MMmcsa[c] + MMmcsa[c]$                                        | 0     | 1000 | 17156.1 or 230815.1 or 17155.1                                                                       | Mouse metabolic/transport demand<br>reaction |
| MMMD6hg      | $MMbz[c] + MMmcsa[c] \rightarrow MMmcsa[c] + MMmcsa[c]$                                        | 0     | 1000 | 230815.1                                                                                             | Mouse metabolic/transport demand<br>reaction |
| MMMD7Ag      | $MMbz[c] + MMmcsa[c] \rightarrow MMmcsa[c] + MMmcsa[c]$                                        | 0     | 1000 | 17156.1 or 230815.1 or 17155.1                                                                       | Mouse metabolic/transport demand<br>reaction |
| MMMD7B1g     | $MMbz[c] + MMmcsa[c] \rightarrow MMmcsa[c] + MMmcsa[c]$                                        | 0     | 1000 | 230815.1                                                                                             | Mouse metabolic/transport demand<br>reaction |
| MMMD7B2g     | $MMbz[c] + MMmcsa[c] \rightarrow MMmcsa[c] + MMmcsa[c]$                                        | 0     | 1000 | 17156.1 or 230815.1 or 17155.1                                                                       | Mouse metabolic/transport demand<br>reaction |

|              |                                                                           |       |      |  |                                                                            |                                           |
|--------------|---------------------------------------------------------------------------|-------|------|--|----------------------------------------------------------------------------|-------------------------------------------|
| MMMT7Cag     | MMb2o[g] + MMdn7msoA[g] -> MMdnmsoC[g] + MMdnm[g]                         | 0     | 1000 |  | 17156.1 or 23081.5 or 17155.1                                              | Moose metabolic/transport demand reaction |
| MMMT7Cbg     | MMb2o[g] + MMdn7msoC[g] -> MMdnmsoC[g] + MMdnm[g]                         | 0     | 1000 |  | 17156.1 or 23081.5 or 17155.1                                              | Moose metabolic/transport demand reaction |
| MMMB8Ag      | MMb2o[g] + MMdnmsoA[g] -> MMdnmsoC[g] + MMdnm[g]                          | 0     | 1000 |  | 17156.1 or 23081.5 or 17155.1                                              | Moose metabolic/transport demand reaction |
| MMMB8Bcr     | MMb2o[f] + MMdnmsoA[m] -> MMdnmsoC[f] + MMdnm[f]                          | 0     | 1000 |  | 17156.1 or 23081.5 or 17155.1                                              | Moose metabolic/transport demand reaction |
| MMMB8C'g     | MMb2o[g] + MMdnmsoA[g] -> MMdnm[g] + MMdn7msoC[g]                         | 0     | 1000 |  | 227619.1                                                                   | Moose metabolic/transport demand reaction |
| MMBACD       | MMb[c] + MMdnmsoA-Si[c] -> MMb2o2[c] + MMbpcso[c]                         | 0     | 1000 |  | 17156.1 or 23081.5 or 17155.1                                              | Moose metabolic/transport demand reaction |
| MMBMC7Du     | MMb[m] + MMdnmsoA-Si[m] -> MMb2o2[m] + MMbpcso[m]                         | 0     | 1000 |  | 56909.1                                                                    | Moose metabolic/transport demand reaction |
| MMBMC7Dp     | MMb[c] + MMdnmsoA-Si[c] -> MMb2o2[c] + MMbpcso[c]                         | 0     | 1000 |  | 56909.1                                                                    | Moose metabolic/transport demand reaction |
| MMBMEin      | MMdnmsoA-R[m] -> MMdnmsoA-Si[m]                                           | -1000 | 1000 |  | 56909.1                                                                    | Moose metabolic/transport demand reaction |
| MMBMMin      | MMdnmsoA-R[m] -> MMdnmsoC[m]                                              | -1000 | 1000 |  | 73724.1                                                                    | Moose metabolic/transport demand reaction |
| MMBMSAD1m    | MMb2o[m] + MMdnm[g] -> MMb2o2[m] + MMbpcso[m]                             | 0     | 1000 |  | 17850.1                                                                    | Moose metabolic/transport demand reaction |
| MMBMSAD3m    | MMb2o[m] + MMdnm[g] + MMbpcso[m] -> MMb2o2[m] + MMbpcso[m]                | 0     | 1000 |  | 104776.1                                                                   | Moose metabolic/transport demand reaction |
| MMMTSAdm     | MMb2o[m] + MMdnm[g] + MMbpcso[m] -> MMb2o2[m] + MMdnm[m] + MMdnmsoA-R[m]  | 0     | 1000 |  | 104776.1                                                                   | Moose metabolic/transport demand reaction |
| MMMOGAT      | MMb2o2a[c] -> MMbtag_b[c] -> MMb2o[c] + MMbtag_b[c]                       | 0     | 1000 |  |                                                                            | Moose metabolic/transport demand reaction |
| MMMTAP       | MMb[c] + MMb5a[c] -> MMb2o[c] + MMb5m1r[c]                                | 0     | 1000 |  | 23349.1 or 68393.1                                                         | Moose metabolic/transport demand reaction |
| MMMTB7C      | MMb2o[c] + MMbntb[c] -> MMb10b6[c] + MMb[c]                               | -1000 | 1000 |  | 69902.1                                                                    | Moose metabolic/transport demand reaction |
| MMMTB7Cm     | MMb2o[m] + MMbntb[m] -> MMb10b6[m] + MMb[m]                               | -1000 | 1000 |  | 108156.1                                                                   | Moose metabolic/transport demand reaction |
| MMMTB7FD     | MMb2o[c] + MMbntb[c] -> MMb2a[c] + MMbntb[c]                              | -1000 | 1000 |  | 17768.1 or 270685.1                                                        | Moose metabolic/transport demand reaction |
| MMMTB7FD2    | MMb2o[c] + MMbntb[c] -> MMb2a[c] + MMbntb[c]                              | -1000 | 1000 |  | 108156.1                                                                   | Moose metabolic/transport demand reaction |
| MMMTB7FD2m   | MMb2o[m] + MMbntb[m] -> MMb2a[m] + MMbntb[m]                              | -1000 | 1000 |  |                                                                            | Moose metabolic/transport demand reaction |
| MMMTB7FDm    | MMb2o[m] + MMbntb[m] -> MMb2a[m] + MMbntb[m]                              | -1000 | 1000 |  | 17768.1                                                                    | Moose metabolic/transport demand reaction |
| MMMTB7R3     | 2 MMb[c] + MMbntb[c] -> MMbntb[c] -> MMb2o[c] + MMb5m1r[c]                | 0     | 1000 |  | 17768.1 or 270685.1                                                        | Moose metabolic/transport demand reaction |
| MMMTB7Tr     | MMb5m1r[c] -> MMb5m1b[c]                                                  | 0     | 1000 |  | 17769.1                                                                    | Moose metabolic/transport demand reaction |
| MMMTTGXkL    | MMbtag_b[c] -> MMbtag_b[c]                                                | 0     | 1000 |  |                                                                            | Moose metabolic/transport demand reaction |
| MMNTRI       | MMb5m1r[c] -> MMb5m1a1r[c]                                                | -1000 | 1000 |  |                                                                            | Moose metabolic/transport demand reaction |
| MMN2M2MNASm  | MMb2m2mso[m] -> MMb2m2msoe[c]                                             | 0     | 1000 |  |                                                                            | Moose metabolic/transport demand reaction |
| MMN2M2MNASdy | MMb2m2msoe[c] -> MMb2m2msoe[m]                                            | 0     | 1000 |  |                                                                            | Moose metabolic/transport demand reaction |
| MMN7Tg       | MMbtag[m] + MMTrn_angle[c] -> MMb[c] + MMbtag[c]                          | 0     | 1000 |  |                                                                            | Moose metabolic/transport demand reaction |
| MMN4Tg       | MMbtag[m] + MMbcore2[g] -> MMb4Tg + MMbtag[c]                             | 0     | 1000 |  | 94192.1                                                                    | Moose metabolic/transport demand reaction |
| MMNBATNO     | MMb2o[c] + MMbnd[c] + MMb5abnt[c] -> 2 MMb[c] + MMb5abnt[c] + MMb5abnt[c] | 0     | 1000 |  |                                                                            | Moose metabolic/transport demand reaction |
| MMNBATNOm    | MMb2o[m] + MMbnd[m] + MMb5abnt[m] -> 2 MMb[m] + MMb5abnt[m] + MMb5abnt[m] | 0     | 1000 |  | 19758.1 or 56752.1 or 110959.1 or 11668.1 or 11671.1 or 19752.2 or 19753.8 | Moose metabolic/transport demand reaction |
| MMNACASP4H   | MMb2o[c] + MMbNacapo[c] -> MMbasp-Li[c] + MMb[c]                          | 0     | 1000 |  | 212647.1 or 11669.1 or 72535.1                                             | Moose metabolic/transport demand reaction |
| MMNACASPm    | MMbNacapo[m] -> MMbNacapo[c]                                              | 0     | 1000 |  | 11484.1 or 71670.1                                                         | Moose metabolic/transport demand reaction |
| MMNACDe      | MMbnc[c] -> MMbnc[c]                                                      | 0     | 1000 |  |                                                                            | Moose metabolic/transport demand reaction |
| MMNACHX10g   | 2 MMb2o[g] + MMbci_deg7[g] -> 2 MMb2agm[g] + MMbci_deg8[g]                | 0     | 1000 |  |                                                                            | Moose metabolic/transport demand reaction |
| MMNACHX11g   | MMb2o[g] + MMbci_deg10[g] -> MMb2agm[g] + MMbci_deg11[g]                  | 0     | 1000 |  | (15211.1 or 15212.1 or (15212.1 and 15211.1))                              | Moose metabolic/transport demand reaction |
| MMNACHX12g   | MMb2o[g] + MMbci_deg13[g] -> MMb2agm[g] + MMbci_deg14[g]                  | 0     | 1000 |  | (15211.1 or 15212.1 or (15212.1 and 15211.1))                              | Moose metabolic/transport demand reaction |
| MMNACHX13g   | MMb2o[g] + MMbci_deg16[g] -> MMb2agm[g] + MMbci_deg17[g]                  | 0     | 1000 |  | (15211.1 or 15212.1 or (15212.1 and 15211.1))                              | Moose metabolic/transport demand reaction |
| MMNACHX14g   | MMb2o[g] + MMbci_deg19[g] -> MMb2agm[g] + MMbci_deg20[g]                  | 0     | 1000 |  | (15211.1 or 15212.1 or (15212.1 and 15211.1))                              | Moose metabolic/transport demand reaction |
| MMNACHX15g   | MMb2o[g] + MMbci_deg22[g] -> MMb2agm[g] + MMbci_deg23[g]                  | 0     | 1000 |  | (15211.1 or 15212.1 or (15212.1 and 15211.1))                              | Moose metabolic/transport demand reaction |
| MMNACHX16g   | MMb2o[g] + MMbci_deg25[g] -> MMb2agm[g] + MMbci_deg26[g]                  | 0     | 1000 |  | (15211.1 or 15212.1 or (15212.1 and 15211.1))                              | Moose metabolic/transport demand reaction |
| MMNACHX17g   | MMb2o[g] + MMbci_deg28[g] -> MMb2agm[g                                    |       |      |  |                                                                            |                                           |

|               |                                                                                                                                                                        |       |      |                                                                                                                                                                                                                                                                                                                                                                                                                                                                                                                                                                                                                                                                                                                                                                                                                                                       |  |                                           |
|---------------|------------------------------------------------------------------------------------------------------------------------------------------------------------------------|-------|------|-------------------------------------------------------------------------------------------------------------------------------------------------------------------------------------------------------------------------------------------------------------------------------------------------------------------------------------------------------------------------------------------------------------------------------------------------------------------------------------------------------------------------------------------------------------------------------------------------------------------------------------------------------------------------------------------------------------------------------------------------------------------------------------------------------------------------------------------------------|--|-------------------------------------------|
| MMNADH2_u10m  | $5\text{ MMn}[e] + \text{MMnAd}[n] + \text{MMnA}[0] \rightleftharpoons 4\text{ MMn}[e] + \text{MMnAd}[n] + \text{MMnA}[0]_{\text{aq}}$                                 | 0     | 1000 |                                                                                                                                                                                                                                                                                                                                                                                                                                                                                                                                                                                                                                                                                                                                                                                                                                                       |  | Moose metabolic/transport demand reaction |
| MMNADHru      | $\text{MMnAd}[e] \rightarrow \text{MMnAd}[n]$                                                                                                                          | 0     | 1000 | $17992.1 \text{ or } 66495.1 \text{ or } 66218.1 \text{ or } 17993.1 \text{ or } 68342.1 \text{ or } 78330.1 \text{ or } 60377.1 \text{ or } 67184.1 \text{ or } 17991.1 \text{ or } 72800.1 \text{ or } 60081.1 \text{ or } 60675.1 \text{ or } 100043472.1 \text{ or } 54405.1 \text{ or } 230075.2 \text{ or } 66091.1 \text{ or } 75406.1 \text{ or } 67273.1 \text{ or } 80286.2 \text{ or } 66046.1 \text{ or } 78330.2 \text{ or } 66916.1 \text{ or } 68198.1 \text{ or } 228887.1 \text{ or } 227197.1 \text{ or } 68393.1 \text{ or } 230073.1 \text{ or } 227197.1 \text{ or } 66416.1 \text{ or } 68075.1 \text{ or } 226645.1 \text{ or } 80286.1 \text{ or } 407785.1 \text{ or } 17995.1 \text{ or } 68197.1 \text{ or } 595136.1 \text{ or } 66414.1 \text{ or } 67130.1 \text{ or } 67264.1 \text{ or } 68202.1 \text{ or } 68194.1$ |  | Moose metabolic/transport demand reaction |
| MMNADHu       | $\text{MMnAd}[e] \rightarrow \text{MMnAd}[n]$                                                                                                                          | 0     | 1000 |                                                                                                                                                                                                                                                                                                                                                                                                                                                                                                                                                                                                                                                                                                                                                                                                                                                       |  | Moose metabolic/transport demand reaction |
| MMNADK        | $\text{MMnAp}[e] + \text{MMnAd}[e] \rightarrow \text{MMnAp}[e] + \text{MMn}[e] + \text{MMnAd}[e]$                                                                      | 0     | 1000 |                                                                                                                                                                                                                                                                                                                                                                                                                                                                                                                                                                                                                                                                                                                                                                                                                                                       |  | Moose metabolic/transport demand reaction |
| MMNADN        | $\text{MMn}[2e] + \text{MMnAd}[e] \rightarrow \text{MMn}[e] + \text{MMnAp}[e] + \text{MMnAd}[e]$                                                                       | 0     | 1000 | 192185.1                                                                                                                                                                                                                                                                                                                                                                                                                                                                                                                                                                                                                                                                                                                                                                                                                                              |  | Moose metabolic/transport demand reaction |
| MMNADne       | $\text{MMn}[2e] + \text{MMnAd}[e] \rightarrow \text{MMn}[e] + \text{MMnAp}[e] + \text{MMnAd}[e]$                                                                       | 0     | 1000 |                                                                                                                                                                                                                                                                                                                                                                                                                                                                                                                                                                                                                                                                                                                                                                                                                                                       |  | Moose metabolic/transport demand reaction |
| MMNADP3ru     | $\text{MMnAdp}[e] \rightarrow \text{MMnAdp}[n]$                                                                                                                        | 0     | 1000 | 12494.1                                                                                                                                                                                                                                                                                                                                                                                                                                                                                                                                                                                                                                                                                                                                                                                                                                               |  | Moose metabolic/transport demand reaction |
| MMNADP3ru     | $\text{MMnAdp}[e] \rightarrow \text{MMnAdp}[n]$                                                                                                                        | 0     | 1000 |                                                                                                                                                                                                                                                                                                                                                                                                                                                                                                                                                                                                                                                                                                                                                                                                                                                       |  | Moose metabolic/transport demand reaction |
| MMNADPN       | $\text{MMn}[2e] + \text{MMnAdp}[e] \rightarrow \text{MMn}[e] + \text{MMnAd}[e] + \text{MMnAdp}[e]$                                                                     | 0     | 1000 |                                                                                                                                                                                                                                                                                                                                                                                                                                                                                                                                                                                                                                                                                                                                                                                                                                                       |  | Moose metabolic/transport demand reaction |
| MMNADPne      | $\text{MMn}[2e] + \text{MMnAdp}[e] \rightarrow \text{MMn}[e] + \text{MMnAdp}[e] + \text{MMnAd}[e]$                                                                     | 0     | 1000 |                                                                                                                                                                                                                                                                                                                                                                                                                                                                                                                                                                                                                                                                                                                                                                                                                                                       |  | Moose metabolic/transport demand reaction |
| MMNADPru      | $\text{MMnAdp}[r] \rightarrow \text{MMnAdp}[e]$                                                                                                                        | 0     | 1000 | 12494.1                                                                                                                                                                                                                                                                                                                                                                                                                                                                                                                                                                                                                                                                                                                                                                                                                                               |  | Moose metabolic/transport demand reaction |
| MMNADPru      | $\text{MMnAdp}[r] \rightarrow \text{MMnAdp}[e]$                                                                                                                        | 0     | 1000 |                                                                                                                                                                                                                                                                                                                                                                                                                                                                                                                                                                                                                                                                                                                                                                                                                                                       |  | Moose metabolic/transport demand reaction |
| MMNADK2       | $\text{MMn}[2e] + \text{MMnAp}[e] + \text{MMn}[1e] + \text{MMnAd}[e] \rightarrow \text{MMn}[e] + \text{MMnAd}[e] + \text{MMn}[1e] + \text{MMnAp}[e] + \text{MMnAd}[e]$ | 0     | 1000 |                                                                                                                                                                                                                                                                                                                                                                                                                                                                                                                                                                                                                                                                                                                                                                                                                                                       |  | Moose metabolic/transport demand reaction |
| MMNADn        | $\text{MMnAd}[n] \rightleftharpoons \text{MMnAd}[e]$                                                                                                                   | -1000 | 1000 | 78914.1                                                                                                                                                                                                                                                                                                                                                                                                                                                                                                                                                                                                                                                                                                                                                                                                                                               |  | Moose metabolic/transport demand reaction |
| MMNADpu       | $\text{MMnAd}[n] \rightarrow \text{MMnAd}[e]$                                                                                                                          | 0     | 1000 |                                                                                                                                                                                                                                                                                                                                                                                                                                                                                                                                                                                                                                                                                                                                                                                                                                                       |  | Moose metabolic/transport demand reaction |
| MMNADru       | $\text{MMnAd}[r] \rightarrow \text{MMnAd}[e]$                                                                                                                          | 0     | 1000 |                                                                                                                                                                                                                                                                                                                                                                                                                                                                                                                                                                                                                                                                                                                                                                                                                                                       |  | Moose metabolic/transport demand reaction |
| MMNAGA2y      | $\text{MMn}[e] + \text{MMnT\_antigen}[e] + \text{MMnAp}[e] \rightarrow \text{MMnSe\_Thr}[e] + \text{MMnAdp}[e]$                                                        | 0     | 1000 |                                                                                                                                                                                                                                                                                                                                                                                                                                                                                                                                                                                                                                                                                                                                                                                                                                                       |  | Moose metabolic/transport demand reaction |
| MMNAGAb       | $\text{MMn}[e] + \text{MMnAgphab\_hu}[e] + \text{MMnAp}[e] \rightarrow \text{MMnAgphab\_hu}[e] + \text{MMnAdp}[e]$                                                     | 0     | 1000 | 17939.1                                                                                                                                                                                                                                                                                                                                                                                                                                                                                                                                                                                                                                                                                                                                                                                                                                               |  | Moose metabolic/transport demand reaction |
| MMNAGAy       | $\text{MMn}[e] + \text{MMnAgphab\_hu}[e] + \text{MMnAp}[e] \rightarrow \text{MMnAgphab\_hu}[e] + \text{MMnAdp}[e]$                                                     | 0     | 1000 |                                                                                                                                                                                                                                                                                                                                                                                                                                                                                                                                                                                                                                                                                                                                                                                                                                                       |  | Moose metabolic/transport demand reaction |
| MMNAGCLAy     | $\text{MMn}[2e] + \text{MMnCore}[e] \rightarrow \text{MMnAd}[e] + \text{MMnT\_antigen}[e]$                                                                             | 0     | 1000 | 17939.1                                                                                                                                                                                                                                                                                                                                                                                                                                                                                                                                                                                                                                                                                                                                                                                                                                               |  | Moose metabolic/transport demand reaction |
| MMNAHCO3_IC1c | $\text{MMn}[e] + \text{MMn}[e] + \text{MMnAd}[e] + \text{MMnAd}[e] + \text{MMn}[e] + \text{MMn}[e] + \text{MMn}[e] + \text{MMnAd}[e] + \text{MMnAd}[e]$                | -1000 | 1000 |                                                                                                                                                                                                                                                                                                                                                                                                                                                                                                                                                                                                                                                                                                                                                                                                                                                       |  | Moose metabolic/transport demand reaction |
| MMNAh         | $2\text{ MMnAd}[n] + \text{MMn}[e] \rightleftharpoons 2\text{ MMnAd}[e] + \text{MMn}[e]$                                                                               | 0     | 1000 | 94229.1 or 95033.1                                                                                                                                                                                                                                                                                                                                                                                                                                                                                                                                                                                                                                                                                                                                                                                                                                    |  | Moose metabolic/transport demand reaction |
| MMNAi         | $\text{MMnAd}[n] \rightleftharpoons \text{MMnAd}[e]$                                                                                                                   | 0     | 1000 | 114479.1                                                                                                                                                                                                                                                                                                                                                                                                                                                                                                                                                                                                                                                                                                                                                                                                                                              |  | Moose metabolic/transport demand reaction |
| MMNAu_i       | $\text{MMn}[e] + \text{MMnAd}[e] \rightleftharpoons \text{MMn}[e] + \text{MMnAd}[e]$                                                                                   | -1000 | 0    | 53881.1 or 20357.1 or 114479.1                                                                                                                                                                                                                                                                                                                                                                                                                                                                                                                                                                                                                                                                                                                                                                                                                        |  | Moose metabolic/transport demand reaction |
| MMNAu3_1g     | $\text{MMnAd}[e] + \text{MMn}[e] \rightleftharpoons \text{MMnAd}[e] + \text{MMnAd}[n]$                                                                                 | -1000 | 1000 | 277973.1 or 105243.1 or 226999.1 or 20544.1 or 110895.1                                                                                                                                                                                                                                                                                                                                                                                                                                                                                                                                                                                                                                                                                                                                                                                               |  | Moose metabolic/transport demand reaction |
| MMNAu5        | $\text{MMnAd}[e] + \text{MMnAd}[e] \rightleftharpoons \text{MMnAd}[e] + \text{MMnAd}[e]$                                                                               | 0     | 1000 | 236727.1 or 77031.1                                                                                                                                                                                                                                                                                                                                                                                                                                                                                                                                                                                                                                                                                                                                                                                                                                   |  | Moose metabolic/transport demand reaction |
| MMNAu         | $\text{MMnAd}[e] \rightleftharpoons \text{MMnAd}[n]$                                                                                                                   | -1000 | 1000 | 105243.1 or 226999.1 or 20544.1                                                                                                                                                                                                                                                                                                                                                                                                                                                                                                                                                                                                                                                                                                                                                                                                                       |  | Moose metabolic/transport demand reaction |
| MMNBH2_F      | $\text{MMn}[2e] + \text{MMnAd}[e] \rightarrow \text{MMnAd}[e] + \text{MMn}[1e]$                                                                                        | 0     | 1000 |                                                                                                                                                                                                                                                                                                                                                                                                                                                                                                                                                                                                                                                                                                                                                                                                                                                       |  | Moose metabolic/transport demand reaction |
| MMNCAMde      | $\text{MMnAd}[e] \rightarrow \text{MMnAd}[e]$                                                                                                                          | 0     | 1000 | 338403.1                                                                                                                                                                                                                                                                                                                                                                                                                                                                                                                                                                                                                                                                                                                                                                                                                                              |  | Moose metabolic/transport demand reaction |
| MMNCAMU       | $\text{MMnAd}[e] \rightarrow \text{MMnAd}[e]$                                                                                                                          | 0     | 1000 |                                                                                                                                                                                                                                                                                                                                                                                                                                                                                                                                                                                                                                                                                                                                                                                                                                                       |  | Moose metabolic/transport demand reaction |
| MMNCU1        | $\text{MMnAd}[e] + \text{MMn}[2e] \rightarrow \text{MMnAd}[e] + \text{MMn}[e]$                                                                                         | 0     | 1000 |                                                                                                                                                                                                                                                                                                                                                                                                                                                                                                                                                                                                                                                                                                                                                                                                                                                       |  | Moose metabolic/transport demand reaction |
| MMNCN1        | $4\text{ MMnAd}[e] + \text{MMn}[e] + \text{MMn}[2e] \rightleftharpoons 4\text{ MMnAd}[e] + \text{MMn}[e] + \text{MMn}[2e]$                                             | -1000 | 1000 | 20497.1                                                                                                                                                                                                                                                                                                                                                                                                                                                                                                                                                                                                                                                                                                                                                                                                                                               |  | Moose metabolic/transport demand reaction |
| MMNCN1        | $4\text{ MMnAd}[e] + \text{MMn}[e] + \text{MMn}[2e] \rightleftharpoons \text{MMnAd}[e] + 4\text{ MMnAd}[e] + \text{MMn}[2e]$                                           | -1000 | 1000 | 238384.1 or 214111.1 or 238384.2 or 238384.3 or 76756.1 or 94249.1                                                                                                                                                                                                                                                                                                                                                                                                                                                                                                                                                                                                                                                                                                                                                                                    |  | Moose metabolic/transport demand reaction |
| MMNDP10ex     | $\text{MMn}[2e] + \text{MMnAp}[e] \rightarrow \text{MMn}[e] + \text{MMnAp}[e] + \text{MMnAp}[e]$                                                                       | 0     | 1000 |                                                                                                                                                                                                                                                                                                                                                                                                                                                                                                                                                                                                                                                                                                                                                                                                                                                       |  |                                           |

|                |                                                                                                            |       |      |                                                                |                                              |
|----------------|------------------------------------------------------------------------------------------------------------|-------|------|----------------------------------------------------------------|----------------------------------------------|
| MMNMAE         | $MMap[c] + MMb[c] + MManc[c] \rightleftharpoons MMald[c] + MMp[c]$                                         | -1000 | 1000 | 66454.1                                                        | Mouse metabolic/transport demand<br>reaction |
| MMNMS          | $MMb[c] + MMppp[c] + MManc[c] \rightarrow MMp[c] + MManc[c]$                                               | 0     | 1000 | 226518.1 or 226518.2 or 74080.1                                | Mouse metabolic/transport demand<br>reaction |
| MMNMn          | $MManc[c] \rightleftharpoons MManc[n]$                                                                     | -1000 | 1000 |                                                                | Mouse metabolic/transport demand<br>reaction |
| MMNMPDCOX      | $MMb2[c] + MMamp[c] \rightarrow MMb2[c] + MMb4[c] + MMlup[c]$                                              | 0     | 1000 |                                                                | Mouse metabolic/transport demand<br>reaction |
| MMNNAAT        | $MMap[c] + MMb[c] + MMncr[c] \rightarrow MMp[c] + MMald[c]$                                                | 0     | 1000 | 237940.1 or 237940.2 or 11754.1 or 76507.1                     | Mouse metabolic/transport demand<br>reaction |
| MMNNA7m        | $MMb[n] + MMap[n] + MManc[n] \rightarrow MMp[n] + MMald[n]$                                                | 0     | 1000 | 18605.1 or 18606.1 or 209558.1                                 | Mouse metabolic/transport demand<br>reaction |
| MMNNA7n        | $MMap[n] + MMb[n] + MMncr[n] \rightarrow MMp[n] + MMald[n]$                                                | 0     | 1000 | 74080.1                                                        | Mouse metabolic/transport demand<br>reaction |
| MMNNAE         | $MMap[c] + MMb[c] + MManc[c] \rightleftharpoons MMp[c] + MMald[c]$                                         | -1000 | 1000 | 66454.1                                                        | Mouse metabolic/transport demand<br>reaction |
| MMNNDPR        | $2 MMb[c] + MMppp[c] + MMaph[c] \rightarrow MMb2[c] + MMp[c] + MMncr[c]$                                   | 0     | 1000 | 226518.1 or 226518.2 or 74080.1                                | Mouse metabolic/transport demand<br>reaction |
| MMNNMT         | $MManc[c] + MManc[c] \rightarrow MMlncr[c] + MMhcy[c]$                                                     | 0     | 1000 | 67375.1                                                        | Mouse metabolic/transport demand<br>reaction |
| MMNORANMT      | $MManc[c] + MMppp[c] \rightarrow MMb[c] + MMhcy[c]$                                                        | 0     | 1000 | 18113.1                                                        | Mouse metabolic/transport demand<br>reaction |
| MMNOS1         | $MMb2[c] + MMb[c] + MMald[c] + MMarg L[c] \rightarrow MMb2[c] + MMald[c] + MMhcr[c]$                       | 0     | 1000 | 18948.1                                                        | Mouse metabolic/transport demand<br>reaction |
| MMNOS2         | $2 MMb2[c] + MMaldp[c] + 2 MMharg[c] \rightarrow 2 MMb2[c] + MMb[c] + MMaldp[c] + 2 MMc L[c] + 2 MMald[c]$ | 0     | 1000 | 18125.1 or 18126.1 or 18126.2 or 18127.1                       | Mouse metabolic/transport demand<br>reaction |
| MMNO6          | $MMn[c] \rightleftharpoons MMn[c]$                                                                         | 0     | 1000 | 18125.1 or 18126.1 or 18126.2 or 18127.1                       | Mouse metabolic/transport demand<br>reaction |
| MMNP1          | $MMb[c] + MManc[c] + MMr[c] \rightarrow MMp[c] + MMncr[c]$                                                 | 0     | 1000 |                                                                | Mouse metabolic/transport demand<br>reaction |
| MMNP7D4e       | $MMp[c] \rightleftharpoons MMp[c]$                                                                         | 0     | 1000 | 66704.1                                                        | Mouse metabolic/transport demand<br>reaction |
| MMNRP4RSF1     | $MMppp[c] \rightarrow MMppp[c]$                                                                            | 0     | 1000 |                                                                | Mouse metabolic/transport demand<br>reaction |
| MMNRP4RVSS5C   | $MMb2[c] + MMap[c] + MMppp[c] \rightarrow MMald[c] + 2 MMb[c] + MMald[c] + MMppp[c]$                       | 0     | 1000 |                                                                | Mouse metabolic/transport demand<br>reaction |
| MMNRP4RH_2_r   | $2 MMald[c] + MMppp[c] \rightleftharpoons 2 MMald[c] + MMppp[c]$                                           | 0     | 1000 | 214084.1 or 110877.1                                           | Mouse metabolic/transport demand<br>reaction |
| MMNRP4RHu      | $MMppp[c] \rightleftharpoons MMppp[c]$                                                                     | 0     | 1000 | 20538.1 or 13162.1                                             | Mouse metabolic/transport demand<br>reaction |
| MMNRVNCCOAs    | $MMarvcc[c] \rightleftharpoons MMarvcc[c]$                                                                 | -1000 | 1000 | 20518.1 or 20519.1 or 20518.2                                  | Mouse metabolic/transport demand<br>reaction |
| MMNRVNCCPT2    | $MMcr[c] + MMarvcc[c] \rightarrow MMcc[c] + MMarvcc[c]$                                                    | 0     | 1000 |                                                                | Mouse metabolic/transport demand<br>reaction |
| MMNRVNCCPT7    | $MMcc[n] + MMarvcc[n] \rightarrow MMcr[n] + MMarvcc[n]$                                                    | 0     | 1000 | 12895.4 or 12894.1 or 78070.1 or 12895.2 or 12895.3 or 12895.1 | Mouse metabolic/transport demand<br>reaction |
| MMNRVNCCRN1    | $MMarvcc[n] \rightarrow MMarvcc[n]$                                                                        | 0     | 1000 | 12896.1                                                        | Mouse metabolic/transport demand<br>reaction |
| MMNRVNC1       | $MMarvcc[c] \rightleftharpoons MMarvcc[c]$                                                                 | 0     | 1000 | 57279.1                                                        | Mouse metabolic/transport demand<br>reaction |
| MMNS26Tg       | $MMcrpcc[c] + MMdT\_argr[c] \rightarrow MMb[c] + MMcrp[c] + MMdT\_argr[c]$                                 | 0     | 1000 |                                                                | Mouse metabolic/transport demand<br>reaction |
| MMNS26Tg       | $MMcrpcc[c] + MMTr\_argr[c] \rightarrow MMb[c] + MMcrp[c] + MMTr\_argr[c]$                                 | 0     | 1000 | 20445.1                                                        | Mouse metabolic/transport demand<br>reaction |
| MMNT5C         | $MMb2[c] + MManc[c] \rightarrow MMp[c] + MMncr[c]$                                                         | 0     | 1000 | 20445.1                                                        | Mouse metabolic/transport demand<br>reaction |
| MMNTD1         | $MMb2[c] + MMap[c] \rightarrow MMp[c] + MMald[c]$                                                          | 0     | 1000 | 76952.1                                                        | Mouse metabolic/transport demand<br>reaction |
| MMNTD10        | $MMb2[c] + MMap[c] \rightarrow MMp[c] + MMald[c]$                                                          | 0     | 1000 | 50773.1                                                        | Mouse metabolic/transport demand<br>reaction |
| MMNTD12        | $MMb2[c] + MMap[c] \rightarrow MMp[c] + MMald[c]$                                                          | 0     | 1000 | 76952.1                                                        | Mouse metabolic/transport demand<br>reaction |
| MMNTD1m        | $MMb2[n] + MMap[n] \rightarrow MMp[n] + MMald[n]$                                                          | 0     | 1000 | 50773.1                                                        | Mouse metabolic/transport demand<br>reaction |
| MMNTD2         | $MMb2[c] + MMap[c] \rightarrow MMp[c] + MMald[c]$                                                          | 0     | 1000 | 103850.1                                                       | Mouse metabolic/transport demand<br>reaction |
| MMNTD2e        | $MMb2[c] + MMap[c] \rightarrow MMp[c] + MMald[c]$                                                          | 0     | 1000 | 107569.1                                                       | Mouse metabolic/transport demand<br>reaction |
| MMNTD2i        | $MMb2[c] + MMap[c] \rightarrow MMp[c] + MMald[c]$                                                          | 0     | 1000 | 23959.1                                                        | Mouse metabolic/transport demand<br>reaction |
| MMNTD2m        | $MMb2[n] + MMap[n] \rightarrow MMp[n] + MMald[n]$                                                          | 0     | 1000 | 11432.1                                                        | Mouse metabolic/transport demand<br>reaction |
| MMNTD3         | $MMb2[c] + MMcrp[c] \rightarrow MMp[c] + MMhcy[c]$                                                         | 0     | 1000 | 103850.1                                                       | Mouse metabolic/transport demand<br>reaction |
| MMNTD4         | $MMb2[c] + MMcrp[c] \rightarrow MMp[c] + MMhcy[c]$                                                         | 0     | 1000 | 11432.1                                                        | Mouse metabolic/transport demand<br>reaction |
| MMNTD4e        | $MMb2[c] + MMcrp[c] \rightarrow MMp[c] + MMhcy[c]$                                                         | 0     | 1000 | 107569.1                                                       | Mouse metabolic/transport demand<br>reaction |
| MMNTD4i        | $MMb2[c] + MMcrp[c] \rightarrow MMp[c] + MMhcy[c]$                                                         | 0     | 1000 | 23959.1                                                        | Mouse metabolic/transport demand<br>reaction |
| MMNTD5         | $MMb2[c] + MMdmp[c] \rightarrow MMp[c] + MMhcy[c]$                                                         | 0     | 1000 | 11432.1                                                        | Mouse metabolic/transport demand<br>reaction |
| MMNTD5i        | $MMb2[c] + MMdmp[c] \rightarrow MMp[c] + MMhcy[c]$                                                         | 0     | 1000 | 50773.1                                                        | Mouse metabolic/transport demand<br>reaction |
| MMNTD5m        | $MMb2[n] + MMdmp[n] \rightarrow MMp[n] + MMhcy[n]$                                                         | 0     | 1000 | 11432.1                                                        | Mouse metabolic/transport demand<br>reaction |
| MMNTD6         | $MMb2[c] + MMap[c] \rightarrow MMp[c] + MMald-2[c]$                                                        | 0     | 1000 | 103850.1                                                       | Mouse metabolic/transport demand<br>reaction |
| MMNTD6i        | $MMb2[c] + MMap[c] \rightarrow MMp[c] + MMald-2[c]$                                                        | 0     | 1000 | 76952.1                                                        | Mouse metabolic/transport demand<br>reaction |
| MMNTD7e        | $MMb2[c] + MMap[c] \rightarrow MMald[c] + MMp[c]$                                                          | 0     | 1000 | 11432.1                                                        | Mouse metabolic/transport demand<br>reaction |
| MMNTD7i        | $MMb2[c] + MMap[c] \rightarrow MMald[c] + MMp[c]$                                                          | 0     | 1000 | 23959.1                                                        | Mouse metabolic/transport demand<br>reaction |
| MMNTD8         | $MMb2[c] + MMdmp[c] \rightarrow MMp[c] + MMdmp[c]$                                                         | 0     | 1000 | 11432.1                                                        | Mouse metabolic/transport demand<br>reaction |
| MMNTD8i        | $MMb2[c] + MMdmp[c] \rightarrow MMp[c] + MMdmp[c]$                                                         | 0     | 1000 | 50773.1 or 76952.1                                             | Mouse metabolic/transport demand<br>reaction |
| MMNTD9         | $MMb2[c] + MMdmp[c] \rightarrow MMp[c] + MMdmp[c]$                                                         | 0     | 1000 | 11432.1                                                        | Mouse metabolic/transport demand<br>reaction |
| MMNTD9e        | $MMb2[c] + MMdmp[c] \rightarrow MMp[c] + MMdmp[c]$                                                         | 0     | 1000 | 76952.1                                                        | Mouse metabolic/transport demand<br>reaction |
| MMNTD9i        | $MMb2[c] + MMdmp[c] \rightarrow MMp[c] + MMdmp[c]$                                                         | 0     | 1000 | 23959.1                                                        | Mouse metabolic/transport demand<br>reaction |
| MMNTMEL3suc    | $MMNucb[c] \rightarrow MMNucb[c]$                                                                          | 0     | 1000 | 11432.1                                                        | Mouse metabolic/transport demand<br>reaction |
| MMNTP3e        | $MMb2[c] + MMdmp[c] \rightarrow MMb[c] + MMp[c] + MMdmp[c]$                                                | 0     | 1000 |                                                                | Mouse metabolic/transport demand<br>reaction |
| MMNTPP10       | $MMb2[c] + MMdmp[c] \rightarrow MMb[c] + MMp[c] + MMdmp[c]$                                                | 0     | 1000 | 76025.1                                                        | Mouse metabolic/transport demand<br>reaction |
| MMNTPP11       | $MMb2[c] + MMap[c] \rightarrow MMb[c] + MMdmp[c] + MMdmp[c]$                                               | 0     | 1000 | 16434.1 or 16434.2                                             | Mouse metabolic/transport demand<br>reaction |
| MMNTPP9        | $MMb2[c] + MMap[c] \rightarrow MMb[c] + MMdmp[c] + MMdmp[c]$                                               | 0     | 1000 | 16434.1 or 16434.2                                             | Mouse metabolic/transport demand<br>reaction |
| MMO16G1e       | $MMb2[c] + MMhys[c] \rightarrow MMb-1[c] + MMhys[c]$                                                       | 0     | 1000 | 16434.1 or 16434.2                                             | Mouse metabolic/transport demand<br>reaction |
| MMO16G2e       | $MMb2[c] + MMhcr[c] \rightarrow MMb-1[c] + MMhcr[c]$                                                       | 0     | 1000 | 69983.1                                                        | Mouse metabolic/transport demand<br>reaction |
| MMO28a         | $MMb2[c] \rightleftharpoons MMb2[c]$                                                                       | -1000 | 0    | 69983.1                                                        | Mouse metabolic/transport demand<br>reaction |
| MMO28m         | $MMb2[c] \rightleftharpoons MMb2[m]$                                                                       | -1000 | 1000 |                                                                | Mouse metabolic/transport demand<br>reaction |
| MMO28n         | $MMb2[c] \rightleftharpoons MMb2[n]$                                                                       | -1000 | 1000 |                                                                | Mouse metabolic/transport demand<br>reaction |
| MMO28s         | $MMb2[c] \rightleftharpoons MMb2[s]$                                                                       | -1000 | 1000 |                                                                | Mouse metabolic/transport demand<br>reaction |
| MMO2i          | $MMb2[c] \rightleftharpoons MMb2[i]$                                                                       | 0     | 1000 |                                                                | Mouse metabolic/transport demand<br>reaction |
| MMO2ier        | $MMb2[c] \rightleftharpoons MMb2[ir]$                                                                      | -1000 | 1000 |                                                                | Mouse metabolic/transport demand<br>reaction |
| MMO2m          | $MMb2[c] \rightleftharpoons MMb2[m]$                                                                       | -1000 | 1000 |                                                                | Mouse metabolic/transport demand<br>reaction |
| MMO2n          | $MMb2[c] \rightleftharpoons MMb2[n]$                                                                       | -1000 | 1000 |                                                                | Mouse metabolic/transport demand<br>reaction |
| MMO2p          | $MMb2[c] \rightleftharpoons MMb2[p]$                                                                       | -1000 | 1000 |                                                                | Mouse metabolic/transport demand<br>reaction |
| MMOAGD3e       | $MMoug3\_b[c] \rightleftharpoons MMoug3\_b[c]$                                                             | -1000 | 1000 |                                                                | Mouse metabolic/transport demand<br>reaction |
| MMOAGD3g       | $MMoug3\_b[c] \rightleftharpoons MMoug3\_b[c]$                                                             | -1000 | 1000 |                                                                | Mouse metabolic/transport demand<br>reaction |
| MMOAGT3e       | $MMoug3\_b[c] \rightleftharpoons MMoug3\_b[c]$                                                             | -1000 | 1000 |                                                                | Mouse metabolic/transport demand<br>reaction |
| MMOAGT3g       | $MMoug3\_b[c] \rightleftharpoons MMoug3\_b[c]$                                                             | -1000 | 1000 |                                                                | Mouse metabolic/transport demand<br>reaction |
| MMOBHk         | $MMald[c] + MMcc[c] + MMb2b[c] \rightarrow MMald[c] + MMcc[c] + MMb2b[c]$                                  | 0     | 1000 |                                                                | Mouse metabolic/transport demand<br>reaction |
| MMOCT7m        | $MMcr[n] + MMcrp[n] \rightarrow MMcr[n] + MMcrp[n] + MMcr L[n]$                                            | 0     | 1000 |                                                                | Mouse metabolic/transport demand<br>reaction |
| MMOCCOAm       | $MMccca[c] \rightarrow MMccca[n]$                                                                          | 0     | 1000 | 18416.1                                                        | Mouse metabolic/transport demand<br>reaction |
| MMOCCOAn       | $MMccca[c] \rightleftharpoons MMccca[n]$                                                                   | -1000 | 1000 |                                                                | Mouse metabolic/transport demand<br>reaction |
| MMOCCDAu       | $MMccca[c] \rightleftharpoons MMccca[c]$                                                                   | 0     | 1000 |                                                                | Mouse metabolic/transport demand<br>reaction |
| MMOCCDEAr      | $MMccca[c] \rightleftharpoons MMccca[c]$                                                                   | 0     | 1000 |                                                                | Mouse metabolic/transport demand<br>reaction |
| MMOCCDEAFARP1c | $2 MMccca[c] \rightleftharpoons 2 MMccca[c]$                                                               | -1000 | 1000 |                                                                | Mouse metabolic/transport demand<br>reaction |
| MMOCOAT1m      | $MMaca[n] + MMaccu[n] \rightleftharpoons MMaccu[n] + MMaca[n]$                                             | -1000 | 1000 | 14080.1                                                        | Mouse metabolic/transport demand<br>reaction |
| MMOCT7n        | $MMccca[c] \rightleftharpoons MMccca[c]$                                                                   | 0     | 1000 | 67041.1 or 64059.1                                             | Mouse metabolic/transport demand<br>reaction |
| MMODECOAm      | $MModeca[c] \rightleftharpoons MModeca[n]$                                                                 | -1000 | 1000 |                                                                | Mouse metabolic/transport demand<br>reaction |
| MMOIVD1m       | $MMccu[n] + MMald[n] + MMdmp[n] \rightarrow MMccu2[n] + MMald[n] + MMdmp[n]$                               | 0     | 1000 |                                                                | Mouse metabolic/transport demand<br>reaction |
| MMOIVD2m       | $MMccu[n] + MMald[n] + MMdmp[n] \rightarrow MMccu2[n] + MMald[n] + MMdmp[n]$                               | 0     | 1000 | 13171.1 or 12040.1 and 12039.1 or 12040.2 or 13382.1           | Mouse metabolic/transport demand<br>reaction |

|               |                                                                                   |       |      |                                                                    |                                           |
|---------------|-----------------------------------------------------------------------------------|-------|------|--------------------------------------------------------------------|-------------------------------------------|
| MMOYD3m       | MMco[n] + MMdu[n] + MMtup[n] -> MMco2[n] + MMdu[n] + MMtup[n]                     | 0     | 1000 | 13171.1 or 12040.1 and 12099.1 or 12039.1 and 12040.2 or 13382.1   | Mouse metabolic/transport demand reaction |
| MMOLICFATPc   | MMapp[c] + MMco[c] + MMdu[c] -> MMapp[c] + MMdu[c] + MMdu[c]                      | 0     | 1000 | 13171.1 or 12040.1 and 12099.1 or 12039.1 and 12040.2 or 13382.1   | Mouse metabolic/transport demand reaction |
| MMOMEPFAZOLEe | MMompe[n] -> MMompe[n]                                                            | 0     | 1000 | 26569.1                                                            | Mouse metabolic/transport demand reaction |
| MMOMPPC       | MMh[c] + MMdu[c] -> MMco2[c] + MMh[c]                                             | 0     | 1000 |                                                                    | Mouse metabolic/transport demand reaction |
| MMONPPILe     | MMompe[n] -> MMompe[n]                                                            | 0     | 1000 | 22247.1                                                            | Mouse metabolic/transport demand reaction |
| MMOPAFle      | 2 MMco2[c] + MMapp[c] + MMtup[n] -> MMdu[c] + MMh[c] + MMh[c]                     | 0     | 1000 |                                                                    | Mouse metabolic/transport demand reaction |
| MMORETNF      | MMco2[c] + 2 MMtup[n] -> 2 MMtup[n]                                               | 0     | 1000 | 75475.1                                                            | Mouse metabolic/transport demand reaction |
| MMORETNF2     | MMco2[c] + 2 MM13-cis-ret[n] -> 2 MM13-cis-ret[n]                                 | 0     | 1000 |                                                                    | Mouse metabolic/transport demand reaction |
| MMORETNm      | MMtup[n] -> MMtup[n]                                                              | -1000 | 1000 |                                                                    | Mouse metabolic/transport demand reaction |
| MMORETNm2     | MM13-cis-ret[n] -> MM13-cis-ret[n]                                                | -1000 | 1000 |                                                                    | Mouse metabolic/transport demand reaction |
| MMORNALABATle | MMh[c] + MMtup[n] -> MMtup[n] + MMh[c]                                            | 0     | 1000 |                                                                    | Mouse metabolic/transport demand reaction |
| MMORNDC       | MMh[c] + MMtup[n] -> MMco2[c] + MMtup[n]                                          | 0     | 1000 | (30962.1 and 20532.1)                                              | Mouse metabolic/transport demand reaction |
| MMORNLEUBATle | MMh[c] + MMtup[n] -> MMh[c] + MMtup[n]                                            | 0     | 1000 | 18263.1                                                            | Mouse metabolic/transport demand reaction |
| MMORNTAm      | MMtup[n] + MMtup[n] -> MMh[c] + MMh[c]                                            | -1000 | 1000 | (30962.1 and 20532.1)                                              | Mouse metabolic/transport demand reaction |
| MMORNS        | MMtup[n] -> MMtup[n]                                                              | -1000 | 1000 | 18242.1                                                            | Mouse metabolic/transport demand reaction |
| MMORN1m       | MMh[c] + MMtup[n] -> MMh[c] + MMtup[n]                                            | -1000 | 1000 | 11987.1                                                            | Mouse metabolic/transport demand reaction |
| MMORN4m       | MMh[c] + MMtup[n] + MMco2[c] -> MMtup[n] + MMtup[n] + MMco2[c]                    | -1000 | 1000 | 18408.1 or 83885.1                                                 | Mouse metabolic/transport demand reaction |
| MMORN8F       | MMtup[n] -> MMtup[n]                                                              | 0     | 1000 | 18408.1 or 83885.1                                                 | Mouse metabolic/transport demand reaction |
| MMORPT        | MMapp[c] + MMco2[c] -> MMapp[c] + MMtup[n]                                        | -1000 | 1000 | 11989.1 or 11988.1 or 11987.1                                      | Mouse metabolic/transport demand reaction |
| MMOXAHOne     | 2 MMco2[c] + MMtup[n] -> 2 MMco2[c] + MMtup[n]                                    | 0     | 1000 | 22247.1                                                            | Mouse metabolic/transport demand reaction |
| MMOXAp        | MMco2[c] -> MMco2[c]                                                              | 0     | 1000 | 13487.1 or 211583.1 or 13521.1 or 231583.2 or 231583.3             | Mouse metabolic/transport demand reaction |
| MMP4501A1m    | MMh[n] + MMtup[n] + 2 MMco2[n] + MMtup[n] -> 2 MMh[n] + MMtup[n] + MMtup[n]       | 0     | 1000 |                                                                    | Mouse metabolic/transport demand reaction |
| MMP4501B11m   | MM11docetax[n] + MMh[n] + MMtup[n] + MMco2[n] -> MMh[n] + MMtup[n] + MMtup[n]     | 0     | 1000 | 13070.1                                                            | Mouse metabolic/transport demand reaction |
| MMP4501B12m   | MM11docetax[n] + MMh[n] + MMtup[n] + MMco2[n] -> MMh[n] + MMtup[n] + MMtup[n]     | 0     | 1000 | 110115.1                                                           | Mouse metabolic/transport demand reaction |
| MMP4501B21m   | MM11docetax[n] + MMh[n] + MMtup[n] + 2 MMco2[n] -> 2 MMh[n] + MMtup[n] + MMtup[n] | 0     | 1000 | 110115.1                                                           | Mouse metabolic/transport demand reaction |
| MMP45017A1r   | MMco2[n] + MMh[n] + MMtup[n] + MMtup[n] -> MMh[n] + MMtup[n] + MMtup[n]           | 0     | 1000 | 13072.1                                                            | Mouse metabolic/transport demand reaction |
| MMP45017A2r   | 0.5 MMco2[n] + MMh[n] + MMtup[n] + MMtup[n] -> MMh[n] + MMtup[n] + MMtup[n]       | 0     | 1000 | 13074.1                                                            | Mouse metabolic/transport demand reaction |
| MMP45017A3r   | MMco2[n] + MMh[n] + MMtup[n] + MMtup[n] -> MMh[n] + MMtup[n] + MMtup[n]           | 0     | 1000 | 13074.1                                                            | Mouse metabolic/transport demand reaction |
| MMP45017A4r   | 0.5 MMco2[n] + MMh[n] + MMtup[n] + MMtup[n] -> MMh[n] + MMtup[n] + MMtup[n]       | 0     | 1000 | 13074.1                                                            | Mouse metabolic/transport demand reaction |
| MMP45019A1r   | 2 MMco2[n] + MMh[n] + MMtup[n] + MMtup[n] -> 2 MMh[n] + MMtup[n] + MMtup[n]       | 0     | 1000 | 13074.1                                                            | Mouse metabolic/transport demand reaction |
| MMP45019A2r   | 2 MMco2[n] + MMh[n] + MMtup[n] + MMtup[n] -> 2 MMh[n] + MMtup[n] + MMtup[n]       | 0     | 1000 | 13075.1 or 13075.2                                                 | Mouse metabolic/transport demand reaction |
| MMP450181r    | MMco2[n] + MMh[n] + MMtup[n] + MMtup[n] -> MMh[n] + MMtup[n] + MMtup[n]           | 0     | 1000 | 13075.1 or 13075.2                                                 | Mouse metabolic/transport demand reaction |
| MMP45021A1r   | MMco2[n] + MMh[n] + MMtup[n] + MMtup[n] -> MMh[n] + MMtup[n] + MMtup[n]           | 0     | 1000 | 13078.1                                                            | Mouse metabolic/transport demand reaction |
| MMP45021A2r   | MMco2[n] + MMh[n] + MMtup[n] + MMtup[n] -> MMh[n] + MMtup[n] + MMtup[n]           | 0     | 1000 | 13079.1                                                            | Mouse metabolic/transport demand reaction |
| MMP45027A11m  | MMh[n] + MMtup[n] + MMco2[n] + MMtup[n] -> MMh[n] + MMtup[n] + MMtup[n]           | 0     | 1000 | 13079.1                                                            | Mouse metabolic/transport demand reaction |
| MMP45027A12m  | MMtup[n] + MMco2[n] + MMtup[n] -> MMh[n] + MMtup[n] + MMtup[n]                    | 0     | 1000 | 104086.1                                                           | Mouse metabolic/transport demand reaction |
| MMP45027A13m  | MMtup[n] + MMco2[n] + MMtup[n] -> MMh[n] + MMtup[n] + MMtup[n]                    | 0     | 1000 | 104086.1                                                           | Mouse metabolic/transport demand reaction |
| MMP45027A14m  | MMh[n] + MMtup[n] + MMco2[n] + MMtup[n] -> MMh[n] + MMtup[n] + MMtup[n]           | 0     | 1000 | 104086.1                                                           | Mouse metabolic/transport demand reaction |
| MMP45027A15m  | MMh[n] + MMtup[n] + MMco2[n] + MMtup[n] -> 2 MMh[n] + MMtup[n] + MMtup[n]         | 0     | 1000 | 104086.1                                                           | Mouse metabolic/transport demand reaction |
| MMP45027A16m  | MMtup[n] + MMco2[n] + MMtup[n] -> MMh[n] + MMtup[n] + MMtup[n]                    | 0     | 1000 | 104086.1                                                           | Mouse metabolic/transport demand reaction |
| MMP45027A1m   | MMh[n] + MMtup[n] + MMco2[n] + MMtup[n] -> MMh[n] + MMtup[n] + MMtup[n]           | 0     | 1000 | 104086.1                                                           | Mouse metabolic/transport demand reaction |
| MMP4502C18    | 0.5 MMco2[c] + MMh[c] + MMtup[c] + MMtup[c] -> MMh[c] + MMtup[c] + MMtup[c]       | 0     | 1000 | 104086.1                                                           | Mouse metabolic/transport demand reaction |
| MMP4502C19    | MMco2[c] + MMh[c] + MMtup[c] + MMtup[c] -> MMh[c] + MMtup[c] + MMtup[c]           | 0     | 1000 | 72082.1                                                            | Mouse metabolic/transport demand reaction |
| MMP4502C8     | MMco2[c] + MMh[c] + MMtup[c] + MMtup[c] -> MMh[c] + MMtup[c] + MMtup[c]           | 0     | 1000 | 404195.1                                                           | Mouse metabolic/transport demand reaction |
| MMP4502D6     | MMco2[c] + MMh[c] + MMtup[c] + MMtup[c] -> MMh[c] + MMtup[c] + MMtup[c]           | 0     | 1000 | 69888.1 or 69888.2                                                 | Mouse metabolic/transport demand reaction |
| MMP4502E1     | MMco2[c] + MMh[c] + MMtup[c] + MMtup[c] -> MMh[c] + MMtup[c] + MMtup[c]           | 0     | 1000 | 56448.1                                                            | Mouse metabolic/transport demand reaction |
| MMP4502F1     | MMco2[c] + MMh[c] + MMtup[c] + MMtup[c] -> MMh[c] + MMtup[c] + MMtup[c]           | 0     | 1000 | 13106.1                                                            | Mouse metabolic/transport demand reaction |
| MMP45039A1r   | MMco2[n] + MMh[n] + MMtup[n] + MMtup[n] -> MMh[n] + MMtup[n] + MMtup[n]           | 0     | 1000 | 13107.1                                                            | Mouse metabolic/transport demand reaction |
| MMP4503A4     | MMco2[n] + MMh[n] + MMtup[n] + MMtup[n] -> MMh[n] + MMtup[n] + MMtup[n]           | 0     | 1000 | 56050.1                                                            | Mouse metabolic/transport demand reaction |
| MMP4503A4r    | MMco2[n] + MMh[n] + MMtup[n] + MMtup[n] -> MMh[n] + MMtup[n] + MMtup[n]           | 0     | 1000 | 100041375.1                                                        | Mouse metabolic/transport demand reaction |
| MMP4503A5     | MMco2[n] + MMh[n] + MMtup[n] + MMtup[n] -> MMh[n] + MMtup[n] + MMtup[n]           | 0     | 1000 | 56388.1 or 56388.2 or 56388.3                                      | Mouse metabolic/transport demand reaction |
| MMP4503A7r    | MMco2[n] + MMh[n] + MMtup[n] + MMtup[n] -> MMh[n] + MMtup[n] + MMtup[n]           | 0     | 1000 |                                                                    | Mouse metabolic/transport demand reaction |
| MMP45046A1r   | MMco2[n] + MMh[n] + MMtup[n] + MMtup[n] -> MMh[n] + MMtup[n] + MMtup[n]           | 0     | 1000 | 13113.1                                                            | Mouse metabolic/transport demand reaction |
| MMP4504B1r    | MMco2[n] + MMh[n] + MMtup[n] + MMtup[n] -> MMh[n] + MMtup[n] + MMtup[n]           | 0     | 1000 | 13116.1                                                            | Mouse metabolic/transport demand reaction |
| MMP4504F121r  | MMco2[n] + MMh[n] + MMtup[n] + MMtup[n] -> MMh[n] + MMtup[n] + MMtup[n]           | 0     | 1000 | 13107.1                                                            | Mouse metabolic/transport demand reaction |
| MMP4504F122r  | MMco2[n] + MMh[n] + MMtup[n] + MMtup[n] -> MMh[n] + MMtup[n] + MMtup[n]           | 0     | 1000 | 64385.1                                                            | Mouse metabolic/transport demand reaction |
| MMP4504F123r  | MMco2[n] + MMh[n] + MMtup[n] + MMtup[n] -> MMh[n] + MMtup[n] + MMtup[n]           | 0     | 1000 | 106648.1 or 64385.1 or 72054.1                                     | Mouse metabolic/transport demand reaction |
| MMP4504F81r   | MMco2[n] + MMh[n] + MMtup[n] + MMtup[n] -> MMh[n] + MMtup[n] + MMtup[n]           | 0     | 1000 | 64385.1                                                            | Mouse metabolic/transport demand reaction |
| MMP4507A1r    | MMco2[n] + MMh[n] + MMtup[n] + MMtup[n] -> MMh[n] + MMtup[n] + MMtup[n]           | 0     | 1000 | 208285.1                                                           | Mouse metabolic/transport demand reaction |
| MMP4507B11r   | MMco2[n] + MMh[n] + MMtup[n] + MMtup[n] -> MMh[n] + MMtup[n] + MMtup[n]           | 0     | 1000 | 13122.1                                                            | Mouse metabolic/transport demand reaction |
| MMP4507B12r   | MMco2[n] + MMh[n] + MMtup[n] + MMtup[n] -> MMh[n] + MMtup[n] + MMtup[n]           | 0     | 1000 | 13123.1                                                            | Mouse metabolic/transport demand reaction |
| MMP4508B11r   | MMco2[n] + MMh[n] + MMtup[n] + MMtup[n] -> MMh[n] + MMtup[n] + MMtup[n]           | 0     | 1000 | 13123.1                                                            | Mouse metabolic/transport demand reaction |
| MMP4508B13r   | MMco2[n] + MMh[n] + MMtup[n] + MMtup[n] -> MMh[n] + MMtup[n] + MMtup[n]           | 0     | 1000 | 13124.1                                                            | Mouse metabolic/transport demand reaction |
| MMP450L7B4e   | 1.5 MMco2[n] + MMh[n] + MMtup[n] + MMtup[n] -> 2 MMh[n] + MMtup[n] + MMtup[n]     | 0     | 1000 | 13124.1                                                            | Mouse metabolic/transport demand reaction |
| MMP450SCC1m   | MMh[n] + MMtup[n] + MMco2[n] + MMtup[n] -> MMh[n] + MMtup[n] + MMtup[n]           | -1000 | 1000 |                                                                    | Mouse metabolic/transport demand reaction |
| MMPSCTm       | 2 MMco2[n] + MMh[n] + MMtup[n] -> MMh[n] + MMtup[n] + MMtup[n]                    | 0     | 1000 |                                                                    | Mouse metabolic/transport demand reaction |
| MMPSCR        | 2 MMh[c] + MMtup[c] + MMtup[c] -> MMh[c] + MMtup[c] + MMtup[c]                    | 0     | 1000 | 212647.1 or 212647.2                                               | Mouse metabolic/transport demand reaction |
| MMPSCRm       | 2 MMh[n] + MMtup[n] + MMtup[n] -> MMh[n] + MMtup[n] + MMtup[n]                    | 0     | 1000 | 69051.1 or 66194.1                                                 | Mouse metabolic/transport demand reaction |
| MMPSCRs       | 2 MMh[c] + MMtup[c] + MMtup[c] -> MMh[c] + MMtup[c] + MMtup[c]                    | 0     | 1000 | 209027.1 or 209027.2                                               | Mouse metabolic/transport demand reaction |
| MMPSCRm       | 2 MMh[n] + MMtup[n] + MMtup[n] -> MMh[n] + MMtup[n] + MMtup[n]                    | 0     | 1000 | 69051.1 or 66194.1                                                 | Mouse metabolic/transport demand reaction |
| MMFACCOAL     | MMapp[c] + MMco[c] + MMdu[c] -> MMapp[c] + MMdu[c] + MMdu[c]                      | 0     | 1000 | 209027.1 or 209027.2                                               | Mouse metabolic/transport demand reaction |
| MMFAH         | MMh[c] + MMtup[c] -> MMh[c] + MMtup[c]                                            | 0     | 1000 |                                                                    | Mouse metabolic/transport demand reaction |
| MMFAHle       | MMh[c] + MMtup[c] -> MMh[c] + MMtup[c]                                            | 0     | 1000 | 18476.1 and 18475.3 or 18472.1 and 18476.1 and 18475.3 or 100163.1 | Mouse metabolic/transport demand reaction |
| MMFAFS        | MMtup[c] + MMh[c] -> MMh[c] + MMtup[c]                                            | 0     | 1000 | 27226.1                                                            | Mouse metabolic/transport demand reaction |
| MMFAF         | MMtup[c] -> MMtup[c]                                                              | -1000 | 1000 |                                                                    | Mouse metabolic/transport demand reaction |
| MMFAILASP_H5m | MMtup[c] -> MMtup[c]                                                              | -1000 | 1000 |                                                                    | Mouse metabolic/transport demand reaction |
| MMFAILASP_H5n | MMtup[c] -> MMtup[c]                                                              | -1000 | 1000 |                                                                    | Mouse metabolic/transport demand reaction |

|               |                                                                              |       |      |                                                                                                                                                                                                                                                                                                                                                                                                                                                                                    |                                           |
|---------------|------------------------------------------------------------------------------|-------|------|------------------------------------------------------------------------------------------------------------------------------------------------------------------------------------------------------------------------------------------------------------------------------------------------------------------------------------------------------------------------------------------------------------------------------------------------------------------------------------|-------------------------------------------|
| MMPAIL_H3m    | MMPaiL_h3m <=> MMPaiL_h3m                                                    | -1000 | 1000 |                                                                                                                                                                                                                                                                                                                                                                                                                                                                                    | Mouse metabolic/transport demand reaction |
| MMPALFATPc    | MMarp[c] + MMcoac[c] + MMhdu[ac] -> MMarp[c] + MMdpp[c] + MMuac[ac]          | 0     | 1000 |                                                                                                                                                                                                                                                                                                                                                                                                                                                                                    | Mouse metabolic/transport demand reaction |
| MMPANAPP      | MMh2o[c] + MMdpp[ac] -> MMp[c] + MMp[ac]                                     | 0     | 1000 | 26569.1                                                                                                                                                                                                                                                                                                                                                                                                                                                                            | Mouse metabolic/transport demand reaction |
| MMPAP5g       | MMp[ac] <=> MMppp[ac]                                                        | -1000 | 1000 |                                                                                                                                                                                                                                                                                                                                                                                                                                                                                    | Mouse metabolic/transport demand reaction |
| MMPAPg        | MMdpp[ag] -> MMp[ac]                                                         | 0     | 1000 | 73836.1                                                                                                                                                                                                                                                                                                                                                                                                                                                                            | Mouse metabolic/transport demand reaction |
| MMPA_IBst     | MMps_h3c <=> MMps_h3c                                                        | -1000 | 1000 |                                                                                                                                                                                                                                                                                                                                                                                                                                                                                    | Mouse metabolic/transport demand reaction |
| MMPA_IBtg     | MMps_h3c <=> MMps_h3g                                                        | -1000 | 1000 |                                                                                                                                                                                                                                                                                                                                                                                                                                                                                    | Mouse metabolic/transport demand reaction |
| MMPA_IBm      | MMps_h3c <=> MMps_h3m                                                        | -1000 | 1000 |                                                                                                                                                                                                                                                                                                                                                                                                                                                                                    | Mouse metabolic/transport demand reaction |
| MMPCFLOPa     | MMh2o[c] + MMarp[c] + MMpchs_h3m -> MMdpc[c] + MMh[c] + MMp[c] + MMpchs_h3c  | 0     | 1000 |                                                                                                                                                                                                                                                                                                                                                                                                                                                                                    | Mouse metabolic/transport demand reaction |
| MMPCHOLH3de   | MMpchs_h3c -> MMpchs_h3e                                                     | 0     | 1000 | 11982.1                                                                                                                                                                                                                                                                                                                                                                                                                                                                            | Mouse metabolic/transport demand reaction |
| MMPCHOLP_3c   | MMh2o[c] + MMpchs_h3c -> MMp[c] + MMpchs_h3c + MMh3c[c]                      | 0     | 1000 |                                                                                                                                                                                                                                                                                                                                                                                                                                                                                    | Mouse metabolic/transport demand reaction |
| MMPCHOLFg_3c  | MMh2o[ag] + MMpchs_h3c -> MMp[c] + MMchs[ag] + MMp_h3c[ag]                   | 0     | 1000 | 18806.1                                                                                                                                                                                                                                                                                                                                                                                                                                                                            | Mouse metabolic/transport demand reaction |
| MMPCHOLH3m_3c | MMh2o[m] + MMpchs_h3m -> MMp[c] + MMpchs_h3m + MMh3c[m]                      | 0     | 1000 | 18805.1                                                                                                                                                                                                                                                                                                                                                                                                                                                                            | Mouse metabolic/transport demand reaction |
| MMPCHOLP_3m   | MMh2o[r] + MMpchs_h3r -> MMp[c] + MMpchs_h3r + MMp_h3r                       | 0     | 1000 | 18805.1                                                                                                                                                                                                                                                                                                                                                                                                                                                                            | Mouse metabolic/transport demand reaction |
| MMPCHOL_H3ser | MMpchs_h3c <=> MMpchs_h3r                                                    | -1000 | 1000 | 18805.1                                                                                                                                                                                                                                                                                                                                                                                                                                                                            | Mouse metabolic/transport demand reaction |
| MMPCHOL_H3tg  | MMpchs_h3c <=> MMpchs_h3g                                                    | -1000 | 1000 |                                                                                                                                                                                                                                                                                                                                                                                                                                                                                    | Mouse metabolic/transport demand reaction |
| MMPCLAD       | MMh[c] + MMemo[ac] -> MMco2[c] + MMamto[ac]                                  | 0     | 1000 |                                                                                                                                                                                                                                                                                                                                                                                                                                                                                    | Mouse metabolic/transport demand reaction |
| MMPCLYSOX     | MMo2[c] + MMdgl[c] + MMpchs_h3c -> MMco2[c] + MMuac[ac] + MMpchs_h3c         | 0     | 1000 | 266645.1                                                                                                                                                                                                                                                                                                                                                                                                                                                                           | Mouse metabolic/transport demand reaction |
| MMPCREATinfir | MMperac[m] -> MMperac[c]                                                     | 0     | 1000 | 26432.1 or 18822.1 or 26432.2 or 26433.1                                                                                                                                                                                                                                                                                                                                                                                                                                           | Mouse metabolic/transport demand reaction |
| MMPCRNc       | MMpcr[c] -> MMpcr[c]                                                         | 0     | 1000 |                                                                                                                                                                                                                                                                                                                                                                                                                                                                                    | Mouse metabolic/transport demand reaction |
| MMPCRNm       | MMpcr[c] -> MMpcr[m]                                                         | 0     | 1000 |                                                                                                                                                                                                                                                                                                                                                                                                                                                                                    | Mouse metabolic/transport demand reaction |
| MMPCrn        | MMp[ac] + MMarp[ac] + MMco2[m] -> MMh[m] + MMdpp[ac] + MMp[ac] + MMuac[ac]   | 0     | 1000 |                                                                                                                                                                                                                                                                                                                                                                                                                                                                                    | Mouse metabolic/transport demand reaction |
| MMPFc1        | MMh2o[c] + MMarp[c] + MMpchs_h3c <=> MMdpc[c] + MMh[c] + MMp[c] + MMpchs_h3c | -1000 | 1000 | 18563.1 or 18563.2                                                                                                                                                                                                                                                                                                                                                                                                                                                                 | Mouse metabolic/transport demand reaction |
| MMPFc3        | MMh2o[c] + MMarp[c] -> MMh[c] + MMarp[c]                                     | 0     | 1000 | 18670.1 or 18670.2 or 18670.3                                                                                                                                                                                                                                                                                                                                                                                                                                                      | Mouse metabolic/transport demand reaction |
| MMPFc3g       | MMh2o[ag] + MMarp[ag] -> MMh[ag] + MMarp[ag]                                 | 0     | 1000 | 18576.1 or 18584.1 or 18578.1 or 18584.2 or 18583.1 or 18584.3 or 18584.4 or 23984.1 or 241489.1 or 207728.1 or 110385.1 or 18577.1 or 54611.1 or 18576.2 or 20863.1 or 18574.1 or 18572.2 or 18575.1 or 218461.1 or 18584.5 or 238871.1 or 18583.2 or 18573.1                                                                                                                                                                                                                     | Mouse metabolic/transport demand reaction |
| MMPFc4        | MMh2o[c] + MM3C5pp[ac] -> MMh[c] + MMdpp[ac]                                 | 0     | 1000 | 23984.1                                                                                                                                                                                                                                                                                                                                                                                                                                                                            | Mouse metabolic/transport demand reaction |
| MMPFc4g       | MMh2o[ag] + MM3C5pp[ag] -> MMh[ag] + MMdpp[ag]                               | 0     | 1000 | 22500.1 and 7600.1 and 18587.1 or 18576.1 or 110855.1 or 18585.1 or 18585.2 or 18585.3 or 18585.4 or 18585.5 or 241489.1 or 207728.1 or 18585.6 or 18585.7 or 18585.8 or 18585.9 or 54611.1 or 18576.1 or 18585.10 or 18574.1 or 18588.1 and 22500.1 and 18582.1 and 110855.1 and 18587.1 or 18573.1 or 18585.11 or 18585.12 or 18585.13 or 18585.14 or 23984.1 or 24202.3 or 18585.15 or 18585.16 or 24202.2 or 24202.1 or 18573.1 or 18575.1 or 18585.17 or 18585.18 or 18585.19 | Mouse metabolic/transport demand reaction |
| MMPFdm        | MMco2[m] + MMa[ag] + MMp[ac] -> MMco2[m] + MMa[ag] + MMuac[ac]               | 0     | 1000 | 23984.1                                                                                                                                                                                                                                                                                                                                                                                                                                                                            | Mouse metabolic/transport demand reaction |
| MMPDXFO       | MMo2[c] + MMpchs[c] <=> MMh2o[c] + MMpchs[c]                                 | -1000 | 1000 | 18597.1 and 68263.1 or 27402.1 and 13382.1 or 68263.1 and 18598.1 or 23539.1                                                                                                                                                                                                                                                                                                                                                                                                       | Mouse metabolic/transport demand reaction |
| MMPDXPP       | MMh2o[c] + MMdpc[c] -> MMp[c] + MMdpc[c]                                     | 0     | 1000 | 103711.1                                                                                                                                                                                                                                                                                                                                                                                                                                                                           | Mouse metabolic/transport demand reaction |
| MMPdEAM       | MMh2o[c] + MMo2[c] + MMp[ac] -> MMh[c] + MMp[ac] + MMuac[ac]                 | 0     | 1000 | 57028.1                                                                                                                                                                                                                                                                                                                                                                                                                                                                            | Mouse metabolic/transport demand reaction |
| MMPDEC1c      | MMh[ac] + MMp[ac] + MMh3c[ac] -> MMp[ac] + MMh3c[ac]                         | 0     | 1000 | 109731.1 or 237940.1 or 17161.1 or 237940.2 or 76507.1                                                                                                                                                                                                                                                                                                                                                                                                                             | Mouse metabolic/transport demand reaction |
| MMPDEC1Ch     | MMh[c] + MMp[ac] + MMh3c[c] <=> MMh[c] + MMp[ac] + MMh3c[c]                  | -1000 | 1000 |                                                                                                                                                                                                                                                                                                                                                                                                                                                                                    | Mouse metabolic/transport demand reaction |
| MMPDEC1ChL    | MMh[ac] + MMdgl[ac] + MMp[ac] -> MMp[ac] + MMh3c[ac]                         | 0     | 1000 |                                                                                                                                                                                                                                                                                                                                                                                                                                                                                    | Mouse metabolic/transport demand reaction |
| MMPDEC3CHL    | MMh[c] + MMp[ac] + MMh3c[c] <=> MMh[c] + MMp[ac] + MMh3c[c]                  | -1000 | 1000 |                                                                                                                                                                                                                                                                                                                                                                                                                                                                                    | Mouse metabolic/transport demand reaction |
| MMPDECCONCATr | MMarp[ac] + MMh[c] + MMuac[ac] + MMp[ac] -> MMarp[ac] + MMp[ac] + MMuac[ac]  | 0     | 1000 |                                                                                                                                                                                                                                                                                                                                                                                                                                                                                    | Mouse metabolic/transport demand reaction |
| MMPDEC1ChL    | MMh[c] + MMp[ac] + MMpchs_h3c -> MMp[ac] + MMpchs_h3c                        | 0     | 1000 |                                                                                                                                                                                                                                                                                                                                                                                                                                                                                    | Mouse metabolic/transport demand reaction |
| MMPDEC1ChL    | MMh[c] + MMp[ac] + MMpchs_h3c -> MMp[ac] + MMpchs_h3c                        | -1000 | 1000 |                                                                                                                                                                                                                                                                                                                                                                                                                                                                                    | Mouse metabolic/transport demand reaction |
| MMPDEC1ChL    | MMh[c] + MMp[ac] + MMpchs_h3c -> MMp[ac] + MMpchs_h3c                        | -1000 | 1000 |                                                                                                                                                                                                                                                                                                                                                                                                                                                                                    | Mouse metabolic/transport demand reaction |
| MMPDEC1ChL    | MMh[c] + MMp[ac] + MMpchs_h3c -> MMp[ac] + MMpchs_h3c                        | -1000 | 1000 |                                                                                                                                                                                                                                                                                                                                                                                                                                                                                    | Mouse metabolic/transport demand reaction |
| MMPDEC1ChL    | MMh[c] + MMp[ac] + MMpchs_h3c -> MMp[ac] + MMpchs_h3c                        | -1000 | 1000 |                                                                                                                                                                                                                                                                                                                                                                                                                                                                                    | Mouse metabolic/transport demand reaction |

|              |                                                                                       |       |      |                                                                                                                                                                                                                                                                                                                                                                                              |                                           |
|--------------|---------------------------------------------------------------------------------------|-------|------|----------------------------------------------------------------------------------------------------------------------------------------------------------------------------------------------------------------------------------------------------------------------------------------------------------------------------------------------------------------------------------------------|-------------------------------------------|
| MMPHE0AT1c   | $MMu[1c] + MMpHe-L[1c] \rightleftharpoons MMu[1c] + MMpHe-L[1c]$                      | 0     | 1000 | 56774.1                                                                                                                                                                                                                                                                                                                                                                                      | Moose metabolic/transport demand reaction |
| MMPHE1ELAT2c | $MMkE-L[1c] + MMpHe-L[1c] \rightleftharpoons MMkE-L[1c] + MMpHe-L[1c]$                | -1000 | 1000 | (7008.1 or 74338.1 and 5794.1)                                                                                                                                                                                                                                                                                                                                                               | Moose metabolic/transport demand reaction |
| MMPHE1LAT1c  | $MMkLo-L[1c] + MMpHe-L[1c] \rightarrow MMuLo-L[1c] + MMpHe-L[1c]$                     | 0     | 1000 | (20339.1 and 17254.1)                                                                                                                                                                                                                                                                                                                                                                        | Moose metabolic/transport demand reaction |
| MMPHE1LAT3c  | $MMpHe-L[1c] \rightleftharpoons MMpHe-L[1c]$                                          | -1000 | 1000 | (20530.1 and 17254.1)                                                                                                                                                                                                                                                                                                                                                                        | Moose metabolic/transport demand reaction |
| MMPHE1M3c    | $MMpHe[m]c \rightarrow MMpHe[m]c$                                                     | 0     | 1000 | 72401.1                                                                                                                                                                                                                                                                                                                                                                                      | Moose metabolic/transport demand reaction |
| MMPHE1M3m    | $MMpHe[m]m \rightleftharpoons MMpHe[m]c$                                              | -1000 | 1000 | 52466.1                                                                                                                                                                                                                                                                                                                                                                                      | Moose metabolic/transport demand reaction |
| MMPHE1TA1    | $MMa[2c] + MMpHe-L[1c] \rightleftharpoons MMpHe-L[1c] + MMpHe[m]c$                    | -1000 | 1000 |                                                                                                                                                                                                                                                                                                                                                                                              | Moose metabolic/transport demand reaction |
| MMPHE1TA1m   | $MMa[2m] + MMpHe-L[1m] \rightleftharpoons MMpHe-L[1m] + MMpHe[m]m$                    | -1000 | 1000 | 14718.1                                                                                                                                                                                                                                                                                                                                                                                      | Moose metabolic/transport demand reaction |
| MMPHE1PTOX2c | $MMo[2c] + MMpHe-L[1c] + MMHep[1c] \rightarrow MMHo-L[1c] + MMHep[m]c$                | 0     | 1000 | 23474.1 or 14719.1                                                                                                                                                                                                                                                                                                                                                                           | Moose metabolic/transport demand reaction |
| MMPHE1B4     | $MMu[1c] + MMpHe-L[1c] \rightarrow MMu[1c] + MMpHe-L[1c]$                             | 0     | 1000 | 18478.1                                                                                                                                                                                                                                                                                                                                                                                      | Moose metabolic/transport demand reaction |
| MMPHE1AL7c   | $MMu[1c] + MMpHe-L[1c] + MMarg-L[1c] \rightarrow MMu[1c] + MMpHe-L[1c] + MMarg-L[1c]$ | 0     | 1000 | 105727.1 or 67360.1 or 69354.1 or 74.1 or 11989.1 or 11988.1 or 11987.1                                                                                                                                                                                                                                                                                                                      | Moose metabolic/transport demand reaction |
| MMPHE1AL7He  | $MMHe[c] + MMpHe-L[1c] + MMarg-L[1c] \rightarrow MMHe[c] + MMpHe-L[1c] + MMarg-L[1c]$ | 0     | 1000 | (20540.1 or (530836.1 and 17254.1))                                                                                                                                                                                                                                                                                                                                                          | Moose metabolic/transport demand reaction |
| MMPHYCBOXL   | $MMb[c] + MMpHe-L[1c] \rightarrow MMo[2c] + MMpAc[m]c$                                | 0     | 1000 | (20540.1 or (530836.1 and 17254.1))                                                                                                                                                                                                                                                                                                                                                          | Moose metabolic/transport demand reaction |
| MMPHYHc      | $MMo[2c] + MMa[2c] + MMpHecox[1c] \rightarrow MMo[2c] + MMa[2c] + MMpHecox[1c]$       | 0     | 1000 | 13195.1                                                                                                                                                                                                                                                                                                                                                                                      | Moose metabolic/transport demand reaction |
| MMPHYQc      | $MMb[2c] + MMa[2c] + MMpHeQ[1c] \rightarrow MMa[2c] + MMb[2c] + MMa[2c] + MMpHeQ[1c]$ | 0     | 1000 | 16922.1                                                                                                                                                                                                                                                                                                                                                                                      | Moose metabolic/transport demand reaction |
| MMPHYT1      | $MMpHe[c] \rightleftharpoons MMpHe[c]$                                                | 0     | 1000 |                                                                                                                                                                                                                                                                                                                                                                                              | Moose metabolic/transport demand reaction |
| MMP134P3P    | $MMb[2c] + MMpua[45p,he]c \rightarrow MMp[c] + MMpua[5p,he]c$                         | 0     | 1000 |                                                                                                                                                                                                                                                                                                                                                                                              | Moose metabolic/transport demand reaction |
| MMP134P3Pb   | $MMb[2c] + MMpua[45p,he]m \rightarrow MMp[45p,he]m + MMp[45p,he]m$                    | 0     | 1000 | 19211.1                                                                                                                                                                                                                                                                                                                                                                                      | Moose metabolic/transport demand reaction |
| MMP134P3Pb   | $MMb[2c] + MMpua[45p,he]m \rightarrow MMp[m] + MMpua[4p,he]m$                         | 0     | 1000 | 19211.1                                                                                                                                                                                                                                                                                                                                                                                      | Moose metabolic/transport demand reaction |
| MMP134P3Pb   | $MMb[2c] + MMpua[4p,he]m \rightarrow MMp[4p,he]m + MMp[4p,he]m$                       | 0     | 1000 |                                                                                                                                                                                                                                                                                                                                                                                              | Moose metabolic/transport demand reaction |
| MMP134P4Pb   | $MMb[2c] + MMpua[4p,he]m \rightarrow MMp[m] + MMpua[5p,he]m$                          | 0     | 1000 |                                                                                                                                                                                                                                                                                                                                                                                              | Moose metabolic/transport demand reaction |
| MMP134P5K    | $MMa[m] + MMpua[4p,he]c \rightarrow MMa[m]c + MMb[c] + MMa[4p,he]c$                   | 0     | 1000 |                                                                                                                                                                                                                                                                                                                                                                                              | Moose metabolic/transport demand reaction |
| MMP134P5Ka   | $MMa[m] + MMpua[4p,he]m \rightarrow MMb[m] + MMa[m] + MMa[4p,he]m$                    | 0     | 1000 | 18719.1 or 18717.1 or 18720.1                                                                                                                                                                                                                                                                                                                                                                | Moose metabolic/transport demand reaction |
| MMP13P3P     | $MMb[2c] + MMpua[5p,he]c \rightarrow MMp[c] + MMpua[5p,he]c$                          | 0     | 1000 |                                                                                                                                                                                                                                                                                                                                                                                              | Moose metabolic/transport demand reaction |
| MMP13P3Pb    | $MMb[2c] + MMpua[5p,he]m \rightarrow MMp[m] + MMpua[5p,he]m$                          | 0     | 1000 | 74302.1 or 74302.2 or 74302.3                                                                                                                                                                                                                                                                                                                                                                | Moose metabolic/transport demand reaction |
| MMP13P4P     | $MMa[m] + MMpua[5p,he]c \rightarrow MMa[m]c + MMb[c] + MMa[4p,he]c$                   | 0     | 1000 |                                                                                                                                                                                                                                                                                                                                                                                              | Moose metabolic/transport demand reaction |
| MMP13P4Ka    | $MMa[m] + MMpua[5p,he]m \rightarrow MMb[m] + MMa[m] + MMa[4p,he]m$                    | 0     | 1000 | 107650.1 or 18719.1 or 224020.1 or 18717.1 or 18720.1 or 84095.1                                                                                                                                                                                                                                                                                                                             | Moose metabolic/transport demand reaction |
| MMP13P5K     | $MMa[m] + MMpua[5p,he]c \rightarrow MMb[c] + MMb[c] + MMa[4p,he]c$                    | 0     | 1000 |                                                                                                                                                                                                                                                                                                                                                                                              | Moose metabolic/transport demand reaction |
| MMP13P5K     | $MMa[m] + MMpua[5p,he]m \rightarrow MMb[m] + MMa[m] + MMa[4p,he]m$                    | 0     | 1000 |                                                                                                                                                                                                                                                                                                                                                                                              | Moose metabolic/transport demand reaction |
| MMP13P5P     | $MMb[2c] + MMpua[5p,he]c \rightarrow MMp[c] + MMpua[5p,he]c$                          | 0     | 1000 | 18719.1 or 18717.1 or 18720.1                                                                                                                                                                                                                                                                                                                                                                | Moose metabolic/transport demand reaction |
| MMP13P5Pb    | $MMa[m] + MMpua[5p,he]m \rightarrow MMa[m]c + MMb[c] + MMa[4p,he]m$                   | 0     | 1000 | 74302.1 or 74302.2 or 74302.3                                                                                                                                                                                                                                                                                                                                                                | Moose metabolic/transport demand reaction |
| MMP13P5Pb    | $MMa[m] + MMpua[5p,he]m \rightarrow MMb[m] + MMa[m] + MMa[4p,he]m$                    | 0     | 1000 | 18710.1 or 18707.1 or 18709.1 or 18706.1 or 74769.1 and 18710.1 or 18708.1 or 18706.1 or 30207.1 and 30955.1 or 18705.1 or 18706.1 or 18710.1 or 18709.1 or 74769.1 or 74769.1 or 18708.1 or 18706.1 or 30955.1 and 23900.1 or 18709.1 and 18707.1 or 18708.2 and 74769.1 or 18706.1 and 18707.1 or 18708.1 and 74769.1 or 18708.3 and 18706.1 or 18708.2 and 18707.1 or 18706.1 and 18708.1 | Moose metabolic/transport demand reaction |
| MMP13P5Pb    | $MMb[2c] + MMpua[5p,he]c \rightarrow MMp[c] + MMpua[5p,he]c$                          | 0     | 1000 |                                                                                                                                                                                                                                                                                                                                                                                              | Moose metabolic/transport demand reaction |
| MMP13P5Pb    | $MMb[2c] + MMpua[5p,he]m \rightarrow MMp[m] + MMpua[5p,he]m$                          | 0     | 1000 |                                                                                                                                                                                                                                                                                                                                                                                              | Moose metabolic/transport demand reaction |
| MMP13P5Pb    | $MMa[m] + MMpua[5p,he]m \rightarrow MMb[m] + MMa[m] + MMa[4p,he]m$                    | 0     | 1000 | 320634.1 or 104015.1 or 320634.2 or 64436.1 or 20975.1 or 16330.1 or 104015.2                                                                                                                                                                                                                                                                                                                | Moose metabolic/transport demand reaction |
| MMP13P5Pb    | $MMb[2c] + MMpua[5p,he]c \rightarrow MMp[c] + MMpua[5p,he]c$                          | 0     | 1000 | 43022.1 or 18797.1 or 18795.1 or 114875.1 or 74055.1 or 227120.1 or 18803.1 or 18798.1 or 18796.1 or 18798.2 or 1880                                                                                                                                                                                                                                                                         |                                           |

|                 |                                                                                                             |       |      |                                                                                                  |                                              |
|-----------------|-------------------------------------------------------------------------------------------------------------|-------|------|--------------------------------------------------------------------------------------------------|----------------------------------------------|
| MMPLn           | $MMp[n] \leftrightarrow MMp[c]$                                                                             | -1000 | 1000 |                                                                                                  | Mouse metabolic/transport demand<br>reaction |
| MMPLn           | $MMp[c] \leftrightarrow MMp[n]$                                                                             | -1000 | 1000 |                                                                                                  | Mouse metabolic/transport demand<br>reaction |
| MMPLA2          | $MMb2[c] + MMa2gho1b[c] \rightarrow MMb[c] + MMbtotal[c] + MMa2gho1b[c]$                                    | 0     | 1000 |                                                                                                  | Mouse metabolic/transport demand<br>reaction |
| MMPLYSFcr       | $MMb2[n] + MMNnwsh[c] \rightarrow MMpshy[n] + MMbshy[n]$                                                    | 0     | 1000 |                                                                                                  | Mouse metabolic/transport demand<br>reaction |
| MMPMANM         | $MMnan[n] \leftrightarrow MMnanp[c]$                                                                        | -1000 | 1000 | 56529.1 or 66624.1 or 66286.1 or 76687.1 or 69019.1                                              | Mouse metabolic/transport demand<br>reaction |
| MMPMVYKc        | $MMap[n] + MM5pwe[n] \rightarrow MMdp[n] + MM5pwe[n]$                                                       | 0     | 1000 | 54128.1 or 66681.1 or 29858.1                                                                    | Mouse metabolic/transport demand<br>reaction |
| MMPM12346Pn     | $MMb2[c] + MMpm12346p[n] \rightarrow MMb[c] + MMp[c] + MMb2sh[c]$                                           | 0     | 1000 | 68603.1                                                                                          | Mouse metabolic/transport demand<br>reaction |
| MMPM12346Pn     | $MMb2[n] + MMpm12346p[n] \rightarrow MMb[n] + MMnan[n] + MMp[n]$                                            | 0     | 1000 | 27399.2 or 271424.1 or 27399.1                                                                   | Mouse metabolic/transport demand<br>reaction |
| MMPM1346Pn      | $MMb2[c] + MMpm1346p[n] \rightarrow MMb[c] + MMp[c] + MMm1345p[c]$                                          | 0     | 1000 | 76500.1 or 76500.2 or 27399.1 or 76500.3 or 76500.4 or 271424.1 or 27399.2 or 76500.5 or 76500.6 | Mouse metabolic/transport demand<br>reaction |
| MMPM1346Pn      | $MMb2[n] + MMpm1346p[n] \rightarrow MMb[n] + MMm1345p[n] + MMp[n]$                                          | 0     | 1000 | 27399.2 or 271424.1 or 27399.1                                                                   | Mouse metabolic/transport demand<br>reaction |
| MMPTCDAFABP1c   | $2 MMpncalc[c] \leftrightarrow 2 MMpncalc[n]$                                                               | -1000 | 1000 | 76500.1 or 76500.2 or 27399.1 or 76500.3 or 76500.4 or 271424.1 or 27399.2 or 76500.5 or 76500.6 | Mouse metabolic/transport demand<br>reaction |
| MMPTCDAAn       | $MMpncalc[c] \leftrightarrow MMpncalc[n]$                                                                   | -1000 | 1000 | 14080.1                                                                                          | Mouse metabolic/transport demand<br>reaction |
| MMPNP           | $MMp[c] + MMnan[c] \leftrightarrow MMb[c] + MMnan[c] + MMb[c]$                                              | -1000 | 1000 |                                                                                                  | Mouse metabolic/transport demand<br>reaction |
| MMPNTEH         | $MMb2[c] + MMp[c] \rightarrow MMcyan[c] + MMpno-R[c]$                                                       | 0     | 1000 | 667034.1                                                                                         | Mouse metabolic/transport demand<br>reaction |
| MMPNTEK         | $MMap[c] + MMpno-R[c] \rightarrow MMdp[c] + MMb[c] + MMdpnuc[c]$                                            | 0     | 1000 | 26464.1 or 26464.2 or 56752.1                                                                    | Mouse metabolic/transport demand<br>reaction |
| MMPNTEK         | $MMap[n] + MMpno-R[n] \rightarrow MMm[n] + MMdp[n] + MMdpnuc[n]$                                            | 0     | 1000 | 75735.1 or 26964.1 or 74450.1 or 74450.2 or 75735.2 or 74450.3 or 74450.4 or 75735.3 or 211347.1 | Mouse metabolic/transport demand<br>reaction |
| MMPTORDe        | $MMpno-R[c] \rightarrow MMpno-R[c]$                                                                         | 0     | 1000 | 74450.5                                                                                          | Mouse metabolic/transport demand<br>reaction |
| MMPTOAs         | $MMb2[c] + MMap[c] + 2 MMa1[c] + MMpno-R[c] \rightarrow MMdp[c] + MMb[c] + MMp[c] + 2 MMa1[c] + MMpno-R[c]$ | 0     | 1000 |                                                                                                  | Mouse metabolic/transport demand<br>reaction |
| MMPPA           | $MMb2[c] + MMp[c] \rightarrow MMb[c] + 2 MMp[c]$                                                            | 0     | 1000 | 330664.1                                                                                         | Mouse metabolic/transport demand<br>reaction |
| MMPPA2          | $MMb2[c] + MMppp[c] \rightarrow MMb[c] + MMp[c] + MMppp[c]$                                                 | 0     | 1000 | 67895.1                                                                                          | Mouse metabolic/transport demand<br>reaction |
| MMPPA2m         | $MMb2[n] + MMppp[n] \rightarrow MMb[n] + MMp[n] + MMppp[n]$                                                 | 0     | 1000 |                                                                                                  | Mouse metabolic/transport demand<br>reaction |
| MMPPAP          | $MMb2[c] + MMps_h[c] \rightarrow MMp[c] + MMdp_h[c]$                                                        | 0     | 1000 |                                                                                                  | Mouse metabolic/transport demand<br>reaction |
| MMPPAer         | $MMb2[n] + MMpp[n] \rightarrow MMb[n] + 2 MMp[n]$                                                           | 0     | 1000 | 67916.1 or 19012.1 or 50784.1 or 19012.2                                                         | Mouse metabolic/transport demand<br>reaction |
| MMPPAan         | $MMb2[n] + MMpp[n] \rightarrow MMb[n] + 2 MMp[n]$                                                           | 0     | 1000 | 14378.1 or 14377.1 or 68401.1                                                                    | Mouse metabolic/transport demand<br>reaction |
| MMPPAa          | $MMb2[n] + MMpp[n] \rightarrow MMb[n] + 2 MMp[n]$                                                           | 0     | 1000 | 74776.1 or 74776.2 or 74776.3 or 74776.4                                                         | Mouse metabolic/transport demand<br>reaction |
| MMPPAa          | $MMppp[c] \rightarrow MMppp[c]$                                                                             | 0     | 1000 |                                                                                                  | Mouse metabolic/transport demand<br>reaction |
| MMPPAam         | $MMppp[c] \rightarrow MMppp[n]$                                                                             | 0     | 1000 |                                                                                                  | Mouse metabolic/transport demand<br>reaction |
| MMPPBNGS        | $2 MM5ap[c] \rightarrow 2 MMb2[c] + MMb[c] + MMppbng[c]$                                                    | 0     | 1000 |                                                                                                  | Mouse metabolic/transport demand<br>reaction |
| MMPPCTC         | $MMb[c] + MMppp[c] \rightarrow MMcc2[c] + MMpnap[c]$                                                        | 0     | 1000 | 17025.1 or 17025.2                                                                               | Mouse metabolic/transport demand<br>reaction |
| MMPPCOACn       | $MMppc[n] + MMap[n] + MMcc[n] + MMb[n] \rightarrow MMb[n] + MMdp[n] + MMm1 + MMmucose-S[n]$                 | 0     | 1000 | 66812.1                                                                                          | Mouse metabolic/transport demand<br>reaction |
| MMPPCOAm        | $MMppc[n] + MMdp[n] \rightarrow MMdp[n] + MMppc[n]$                                                         | 0     | 1000 | 66904.1 and 110821.1                                                                             | Mouse metabolic/transport demand<br>reaction |
| MMPPCTCSp       | $MMb2nan[c] \rightarrow MM1p2a2[n] + MMb2[n]$                                                               | 0     | 1000 | 102632.1 or 66948.1 or 11364.1 or 66885.1 or 11409.1 or 71985.1 or 22921.1                       | Mouse metabolic/transport demand<br>reaction |
| MMPPDOx         | $MMb[c] + MMdp[c] + MMdp-D[c] \rightarrow MMdp[c] + MM12ppb-R[c]$                                           | 0     | 1000 |                                                                                                  | Mouse metabolic/transport demand<br>reaction |
| MMPPDOy         | $MMb[c] + MMdp[c] + MMdp-D[c] \rightarrow MMdp[c] + MM12ppb-R[c]$                                           | 0     | 1000 | 110198.1                                                                                         | Mouse metabolic/transport demand<br>reaction |
| MMPPhc          | $MMp[c] \leftrightarrow MMppp[c]$                                                                           | -1000 | 1000 | 110198.1 or 58810.2 or 11677.1 or 58810.1                                                        | Mouse metabolic/transport demand<br>reaction |
| MMPPHx          | $MMp[c] \leftrightarrow MMppp[c]$                                                                           | -1000 | 1000 |                                                                                                  | Mouse metabolic/transport demand<br>reaction |
| MMPPM           | $MMp[c] \leftrightarrow MMp[c]$                                                                             | -1000 | 1000 |                                                                                                  | Mouse metabolic/transport demand<br>reaction |
| MMPPM12346Pn    | $MMpm12346p[c] \leftrightarrow MMpm12346p[n]$                                                               | -1000 | 1000 | 72157.1                                                                                          | Mouse metabolic/transport demand<br>reaction |
| MMPPM1346Pn     | $MMpm1346p[c] \leftrightarrow MMpm1346p[n]$                                                                 | -1000 | 1000 |                                                                                                  | Mouse metabolic/transport demand<br>reaction |
| MMPPNCL3        | $MMap[c] + MMa2-L[c] + MMppp[c] \rightarrow MMb[c] + MMdp[c] + MMppp[c] + MMdp-L[c] + MMdpnuc[c]$           | 0     | 1000 |                                                                                                  | Mouse metabolic/transport demand<br>reaction |
| MMPPOR          | $MMa2[c] + MMppp[c] \rightarrow MMa2[c] + MM2pshp[c]$                                                       | 0     | 1000 | 106564.1                                                                                         | Mouse metabolic/transport demand<br>reaction |
| MMPPPGnm        | $MMppp[c] \leftrightarrow MMppp[n]$                                                                         | -1000 | 1000 | 15445.1                                                                                          | Mouse metabolic/transport demand<br>reaction |
| MMPPPGOn        | $3 MMa2[n] + 2 MMppp[n] \rightarrow 6 MMb2[n] + 2 MMppp[n]$                                                 | 0     | 1000 |                                                                                                  | Mouse metabolic/transport demand<br>reaction |
| MMPPPin         | $MMppp[c] \leftrightarrow MMppp[n]$                                                                         | -1000 | 1000 | 19044.1                                                                                          | Mouse metabolic/transport demand<br>reaction |
| MMPPAGSr        | $MMap[c] + MMp[c] + MMppp[c] \leftrightarrow MMdp[c] + MMb[c] + MMb[c] + MMdp[c]$                           | -1000 | 1000 |                                                                                                  | Mouse metabolic/transport demand<br>reaction |
| MMPPAIS         | $MMap[c] + MMppp[c] \rightarrow MMdp[c] + 2 MMb[c] + MMp[c] + MMdp[c]$                                      | 0     | 1000 | 14450.1 or 14450.2                                                                               | Mouse metabolic/transport demand<br>reaction |
| MMPPASCS        | $MMap[c] + MMpp-L[c] + MMmuc[c] \leftrightarrow MMdp[c] + MMb[c] + MMp[c] + MM2pshp[c]$                     | -1000 | 1000 | 14450.1 or 14450.2                                                                               | Mouse metabolic/transport demand<br>reaction |
| MMPPROX         | $MMb2[c] + MMmuc[c] \rightarrow 2 MMb2[c] + MMdp[c]$                                                        | 0     | 1000 | 67054.1                                                                                          | Mouse metabolic/transport demand<br>reaction |
| MMPPRODQ        | $MMb2[n] + MMmuc[n] \rightarrow 2 MMb2[n] + MMdp[n]$                                                        | 0     | 1000 | 13861.1                                                                                          | Mouse metabolic/transport demand<br>reaction |
| MMPPFGS         | $MMb2[c] + MMap[c] + MMgh-L[c] + MMppp[c] \rightarrow MMdp[c] + MMb[c] + MMp[c] + MMgh-L[c] + MMppp[c]$     | 0     | 1000 | 17523.1                                                                                          | Mouse metabolic/transport demand<br>reaction |
| MMPPRG2LONESULT | $MMppp[c] + MMppp[c] \rightarrow MMb[c] + MMppp[c] + MMppp[c]$                                              | 0     | 1000 | 237823.1                                                                                         | Mouse metabolic/transport demand<br>reaction |
| MMPPRG2LONEm    | $MMppp[c] \leftrightarrow MMppp[n]$                                                                         | -1000 | 1000 | 20859.1 or 54200.2                                                                               | Mouse metabolic/transport demand<br>reaction |
| MMPPRG2LONEn    | $MMppp[c] \leftrightarrow MMppp[n]$                                                                         | -1000 | 1000 |                                                                                                  | Mouse metabolic/transport demand<br>reaction |
| MMPPRG2TRn      | $MMppp[c] \leftrightarrow MMppp[n]$                                                                         | 0     | 1000 |                                                                                                  | Mouse metabolic/transport demand<br>reaction |
| MMPRISTANALx    | $MMpristana[c] \leftrightarrow MMpristana[c]$                                                               | -1000 | 1000 |                                                                                                  | Mouse metabolic/transport demand<br>reaction |
| MMPRISTCOAn     | $MMppp[c] \leftrightarrow MMppp[c]$                                                                         | -1000 | 1000 |                                                                                                  | Mouse metabolic/transport demand<br>reaction |
| MMPRISTTx       | $MMppp[c] \leftrightarrow MMppp[c]$                                                                         | -1000 | 1000 |                                                                                                  | Mouse metabolic/transport demand<br>reaction |
| MMPRO1x         | $MMdp[c] + MMpp-L[c] \rightarrow 2 MMb[c] + MMdp[c] + MMppp[c]$                                             | 0     | 1000 |                                                                                                  | Mouse metabolic/transport demand<br>reaction |
| MMPRO1un        | $MMdp[n] + MMpp-L[n] \rightarrow 2 MMb[n] + MMdp[n] + MMppp[n]$                                             | 0     | 1000 | 56189.1                                                                                          | Mouse metabolic/transport demand<br>reaction |
| MMPROAGOX1r     | $MMa2[n] + MMdp[n] + MMpp-L[n] \rightarrow MMa2[n] + MMdp-L[n] + MMdp-L[n]$                                 | 0     | 1000 | 19125.1                                                                                          | Mouse metabolic/transport demand<br>reaction |
| MMPROB0A1c      | $MMa1[n] + MMpp-L[n] \rightarrow MMm1[c] + MMdp-L[c]$                                                       | 0     | 1000 | 18453.1 or 18452.1 or 18451.1                                                                    | Mouse metabolic/transport demand<br>reaction |
| MMPROD2         | $MMdp[c] + MMpp-L[c] \rightarrow MMb[c] + MMdp-L[c] + MMppp[c]$                                             | 0     | 1000 | (7008.1 or 74138.1 and 57394.1)                                                                  | Mouse metabolic/transport demand<br>reaction |
| MMPROD2m        | $MMdp[n] + MMpp-L[n] \rightarrow MMb[n] + MMdp-L[n] + MMppp[n]$                                             | 0     | 1000 | 56189.1                                                                                          | Mouse metabolic/transport demand<br>reaction |
| MMPRODPA1c      | $MMb[n] + MMpp-L[n] \rightarrow MMb[c] + MMpp-L[c]$                                                         | 0     | 1000 | 19125.1                                                                                          | Mouse metabolic/transport demand<br>reaction |
| MMPROD2r        | $MMb[c] + MMpp-L[c] \rightarrow MMb[c] + MMpp-L[c]$                                                         | 0     | 1000 | 215335.1                                                                                         | Mouse metabolic/transport demand<br>reaction |
| MMPROD2L        | $MMb[c] + MMpp-L[c] \rightarrow MMb[c] + MMpp-L[c]$                                                         | -1000 | 1000 | 215335.1                                                                                         | Mouse metabolic/transport demand<br>reaction |
| MMPROGLYPEPT1c  | $MMb[n] + MMppp[n] \rightarrow MMb[c] + MMppp[c]$                                                           | 0     | 1000 | 215335.1                                                                                         | Mouse metabolic/transport demand<br>reaction |
| MMPROGLYPRO1c   | $MMb2[c] + MMppp[c] \leftrightarrow MMgh[c] + MMpp-L[c]$                                                    | -1000 | 1000 | 215335.1                                                                                         | Mouse metabolic/transport demand<br>reaction |
| MMPROGLY1       | $MMb[c] + MMppp[c] \rightarrow MMb[c] + MMppp[c]$                                                           | 0     | 1000 | 18624.1                                                                                          | Mouse metabolic/transport demand<br>reaction |
| MMPROGMINOx     | $2 MMa1[n] + MMc1[c] + MMpp-L[n] \rightarrow 2 MMa1[c] + MMc1[c] + MMpp-L[c]$                               | 0     | 1000 |                                                                                                  | Mouse metabolic/transport demand<br>reaction |
| MMPROLPATc      | $MMb[n] + MMpp-L[n] \rightarrow MMb[c] + MMpp-L[c]$                                                         | 0     | 1000 | (102680.1 and 57394.1)                                                                           | Mouse metabolic/transport demand<br>reaction |
| MMPROSTG2L      | $MMb2[c] + MMppp2[c] \leftrightarrow MMb2[c] + MMppp2[c]$                                                   | 0     | 1000 | 215335.1                                                                                         | Mouse metabolic/transport demand<br>reaction |
| MMPROSTGE1      | $MMb2[c] + MMppp2[c] \leftrightarrow MMb2[c] + MMppp2[c]$                                                   | 0     | 1000 | 24059.1                                                                                          | Mouse metabolic/transport demand<br>reaction |
| MMPROSTGE1G     | $MMb2[c] + MMppp2[c] + MMppp2[c] \rightarrow MMdp[c] + MMb[c] + MMppp2[c]$                                  | 0     | 1000 | 24059.1                                                                                          | Mouse metabolic/transport demand<br>reaction |
| MMPROSTG2L      | $MMb2[c] + MMppp2[c] \leftrightarrow MMb2[c] + MMppp2[c]$                                                   | 0     | 1000 | 239273.1                                                                                         | Mouse metabolic/transport demand<br>reaction |
| MMPROSTGE2      | $MMppp2[c] \leftrightarrow MMppp2[c]$                                                                       | 0     | 1000 | 108116.1 or 108115.1 or 24059.1 or 28250.1                                                       | Mouse metabolic/transport demand<br>reaction |
| MMPROSTG2L      | $MMb2[c] + MMppp2[c] + MMppp2[c] \rightarrow MMdp[c] + MMb[c] + MMppp2[c]$                                  | 0     | 1000 | 20518.1 or 20517.1 or 20518.2                                                                    | Mouse metabolic/transport demand<br>reaction |
| MMPROSTG2r      | $MMppp2[c] \leftrightarrow MMppp2[c]$                                                                       | 0     | 1000 | 239273.1                                                                                         | Mouse metabolic/transport demand<br>reaction |
| MMPROSTG2L      | $MMb2[c] + MMppp2[c] \leftrightarrow MMb2[c] + MMppp2[c]$                                                   | 0     | 1000 | 20518.1 or 20517.1 or 20518.1                                                                    | Mouse metabolic/transport demand<br>reaction |
| MMPROSTG2L      | $MMb2[c] + MMppp2[c] \leftrightarrow MMb2[c] + MMppp2[c]$                                                   | 0     | 1000 |                                                                                                  | Mouse metabolic/transport demand<br>reaction |
| MMPROSTG2r      | $MMppp2[c] \leftrightarrow MMppp2[c]$                                                                       | -1000 | 1000 |                                                                                                  | Mouse metabolic/transport demand<br>reaction |
| MMPROG2r        | $MMb[c] + MMpp-L[c] \leftrightarrow MMb[c] + MMpp-L[c]$                                                     | 0     | 1000 |                                                                                                  | Mouse metabolic/transport demand<br>reaction |
| MMPROGL         | $MMb[n] + MMpp-L[n] \leftrightarrow MMb[c] + MMpp-L[c]$                                                     | -1000 | 1000 | 215335.1                                                                                         | Mouse metabolic/transport demand<br>reaction |
| MMPROH          | $MMa1[n] + MMpp-L[n] \rightarrow MMa1[c] + MMpp-L[c]$                                                       | 0     | 1000 | 215335.1                                                                                         | Mouse metabolic/transport demand<br>reaction |

|               |                                                                           |       |      |                                                                              |                                              |
|---------------|---------------------------------------------------------------------------|-------|------|------------------------------------------------------------------------------|----------------------------------------------|
| MMPR042z      | 2 MMa1[c] + MMpm-L1c] <=> 2 MMa1[c] + MMpm-L1c]                           | 0     | 1000 | 105727.1 or 07760.1 or 6954.1                                                | Moose metabolic/transport demand<br>reaction |
| MMPR0m        | MMpm-L1c] <=> MMpm-L1m]                                                   | -1000 | 1000 | 240332.1                                                                     | Moose metabolic/transport demand<br>reaction |
| MMPRPNCOAHYDm | MMb2o[m] + MMppco[m] > MMb2co[m]                                          | 0     | 1000 |                                                                              | Moose metabolic/transport demand<br>reaction |
| MMPRPNCOAHYDs | MMb2o[s] + MMppco[s] > MMb2co[s]                                          | 0     | 1000 | 11992.1 or 231086.1 or 97212.1 or 97347.1                                    | Moose metabolic/transport demand<br>reaction |
| MMPRPS        | MMap[c] + MM5p[c] <=> MMb[c] + MMarp[c] + MMppp[c]                        | -1000 | 1000 | 74147.1                                                                      | Moose metabolic/transport demand<br>reaction |
| MMPSDm,3s     | MMb[m] + MMps,3s[m] > MMco2[m] + MMps,3s[m]                               | 0     | 1000 | 75436.1 or 75456.2 or 19139.1 or 110639.1                                    | Moose metabolic/transport demand<br>reaction |
| MMPSERT       | MMgh-L1c] + MM3p[c] > MMalg[c] + MMps-L1c]                                | 0     | 1000 | 320951.1                                                                     | Moose metabolic/transport demand<br>reaction |
| MMPSFLUP      | MMb2o[c] + MMap[c] + MMps,3s[c] > MMalp[c] + MMb[c] + MMp[c] + MMps,3s[c] | 0     | 1000 | 107272.1 or 107273.2                                                         | Moose metabolic/transport demand<br>reaction |
| MMPSFLPm      | MMb2o[c] + MMap[c] + MMps,3s[c] > MMalp[c] + MMb[c] + MMp[c] + MMps,3s[m] | 0     | 1000 | 11982.1 or 11980.1                                                           | Moose metabolic/transport demand<br>reaction |
| MMFSP_L       | MMb2o[c] + MMps-L1c] > MMp[c] + MMps-L1c]                                 | 0     | 1000 | 11982.1 or 11980.1                                                           | Moose metabolic/transport demand<br>reaction |
| MMPSA1,3s     | MMps-L1c] + MMpcho,3s[c] <=> MMcho[c] + MMps,3s[c]                        | -1000 | 1000 | 100678.1                                                                     | Moose metabolic/transport demand<br>reaction |
| MMPSA2,3s     | MMps-L1c] + MMps,3s[c] <=> MMcha[c] + MMps,3s[c]                          | -1000 | 1000 | 19210.1                                                                      | Moose metabolic/transport demand<br>reaction |
| MMPSYGCHe     | MMgcho[m] + MMpp[m] > MMpsych[m]                                          | 0     | 1000 | 27388.1                                                                      | Moose metabolic/transport demand<br>reaction |
| MMPSYGCb      | MMb[c] + MMpsychb[c] <=> MMb[c] + MMpsychb[c]                             | -1000 | 1000 |                                                                              | Moose metabolic/transport demand<br>reaction |
| MMPSYL        | MMb[c] + MMpp[c] <=> MMb[c] + MMpp[c]                                     | -1000 | 1000 |                                                                              | Moose metabolic/transport demand<br>reaction |
| MMPSYTHc      | MMcho[c] + MMpp[m] > MMpsychb[m]                                          | 0     | 1000 |                                                                              | Moose metabolic/transport demand<br>reaction |
| MMPSYTCb      | MMb[c] + MMpsychb[c] <=> MMb[c] + MMpsychb[c]                             | -1000 | 1000 |                                                                              | Moose metabolic/transport demand<br>reaction |
| MMPSYDCHc     | MMcho[c] + MMpp[m] > MMpsychb[m]                                          | 0     | 1000 |                                                                              | Moose metabolic/transport demand<br>reaction |
| MMPSYDTCb     | MMb[c] + MMpsychb[c] <=> MMb[c] + MMpsychb[c]                             | -1000 | 1000 |                                                                              | Moose metabolic/transport demand<br>reaction |
| MMPS_H0er     | MMps,3s[c] <=> MMps,3s[c]                                                 | -1000 | 1000 |                                                                              | Moose metabolic/transport demand<br>reaction |
| MMPS_H8g      | MMps,3s[c] <=> MMps,3s[g]                                                 | -1000 | 1000 |                                                                              | Moose metabolic/transport demand<br>reaction |
| MMPS0         | MMps,3s[c] <=> MMps,3s[c]                                                 | -1000 | 1000 |                                                                              | Moose metabolic/transport demand<br>reaction |
| MMPTDCACNCP1  | MMen[c] + MMpdcac[c] > MMco[c] + MMpdcac[c]                               | 0     | 1000 |                                                                              | Moose metabolic/transport demand<br>reaction |
| MMPTDCACNCP2  | MMco[m] + MMpdcac[m] > MMen[m] + MMpdcac[m]                               | 0     | 1000 | 12895.4 or 12894.1 or 78070.1 or 12895.2 or 12895.3 or 12895.1               | Moose metabolic/transport demand<br>reaction |
| MMPTDCACRn    | MMpdcac[c] > MMpdcac[m]                                                   | 0     | 1000 | 12896.1                                                                      | Moose metabolic/transport demand<br>reaction |
| MMPTDC_Au     | MMpdcac[c] <=> MMpdcac[c]                                                 | 0     | 1000 | 57279.1                                                                      | Moose metabolic/transport demand<br>reaction |
| MMPTEx        | MMpco[m] + MMb2o[s] > MMb[c] + MMco[s] + MMb2o[s]                         | 0     | 1000 |                                                                              | Moose metabolic/transport demand<br>reaction |
| MMPTEx3s      | MMb2o[s] + MMpco[m] > MMb[c] + MMco[s] + MMpco[s]                         | 0     | 1000 | 170789.1 or 171210.1 or 170789.2 or 170789.3                                 | Moose metabolic/transport demand<br>reaction |
| MMPTEx4s      | MMb2o[s] + MMpco[m] > MMb[c] + MMco[s] + MMpco[s]                         | 0     | 1000 | 171210.1                                                                     | Moose metabolic/transport demand<br>reaction |
| MMPTEx3s      | MMb2o[s] + MMpco[m] > MMb[c] + MMco[s] + MMpco[s]                         | 0     | 1000 | 171210.1                                                                     | Moose metabolic/transport demand<br>reaction |
| MMPTHP5       | MMad[c] > MMpp[c] + MMpp[c]                                               | 0     | 1000 | 171210.1                                                                     | Moose metabolic/transport demand<br>reaction |
| MMPTHP5a      | MMad[m] > MMpp[m] + MMpp[m]                                               | 0     | 1000 | 19286.1                                                                      | Moose metabolic/transport demand<br>reaction |
| MMPTPAT       | MMap[c] + MMb[c] + MMpp[m] <=> MMpp[c] + MMb[c]                           | -1000 | 1000 | 19286.1                                                                      | Moose metabolic/transport demand<br>reaction |
| MMPTRCAT1     | MMaco[c] + MMp[c] > MMb[c] + MMco[c] + MMpco[c]                           | 0     | 1000 | 71743.1                                                                      | Moose metabolic/transport demand<br>reaction |
| MMPTRCOX1     | MMb2o[c] + MMco2[c] + MMp[c] > MMb2o2[c] + MMb[c] + MMco[c]               | 0     | 1000 | 69215.1 or 20229.1                                                           | Moose metabolic/transport demand<br>reaction |
| MMFUPN1       | MMp[c] + MMad[c] <=> MMad[c] + MMp[c]                                     | -1000 | 1000 | 237940.1 or 237940.2 or 1754.1 or 76507.1                                    | Moose metabolic/transport demand<br>reaction |
| MMFUPN2       | MMp[c] + MMad-2[c] <=> MMad-2p[c] + MMad-2[c]                             | -1000 | 1000 | 667034.1                                                                     | Moose metabolic/transport demand<br>reaction |
| MMFUPN3       | MMp[c] + MMgs[c] <=> MMgs[c] + MMp[c]                                     | -1000 | 1000 | 667034.1                                                                     | Moose metabolic/transport demand<br>reaction |
| MMFUPN4       | MMp[c] + MMgs[c] <=> MMad-2p[c] + MMgs[c]                                 | -1000 | 1000 | 667034.1                                                                     | Moose metabolic/transport demand<br>reaction |
| MMFUPN5       | MMp[c] + MMns[c] <=> MMns[c] + MMp[c]                                     | -1000 | 1000 | 667034.1                                                                     | Moose metabolic/transport demand<br>reaction |
| MMFUPN6       | MMp[c] + MMad[c] <=> MMad-2p[c] + MMns[c]                                 | -1000 | 1000 | 667034.1                                                                     | Moose metabolic/transport demand<br>reaction |
| MMFUPN7       | MMp[c] + MMns[c] <=> MMns[c] + MMp[c]                                     | -1000 | 1000 | 667034.1                                                                     | Moose metabolic/transport demand<br>reaction |
| MMFVD3        | MM7bch2o[m] <=> MMp[c]                                                    | -1000 | 1000 | 667034.1                                                                     | Moose metabolic/transport demand<br>reaction |
| MMFYAMSP0c    | MMb2o[c] + MMco2[c] + MMpp[m] <=> MMb2o2[c] + MMb[c] + MMpp[c]            | -1000 | 1000 |                                                                              | Moose metabolic/transport demand<br>reaction |
| MMFYAMSPm     | MMppant[c] <=> MMppant[m]                                                 | -1000 | 1000 | 103711.1                                                                     | Moose metabolic/transport demand<br>reaction |
| MMFYDAMK      | MMap[c] + MMpp[m] > MMad[c] + MMb[c]                                      | 0     | 1000 |                                                                              | Moose metabolic/transport demand<br>reaction |
| MMFYDAmr      | MMppant[c] <=> MMppant[c]                                                 | 0     | 1000 | 216134.1                                                                     | Moose metabolic/transport demand<br>reaction |
| MMFYDXSPm     | MMpdc5p[c] <=> MMpdc5p[m]                                                 | -1000 | 1000 |                                                                              | Moose metabolic/transport demand<br>reaction |
| MMFYDXDH      | MMb2o[c] + MMb2o2[c] + MMpp[c] <=> MMb2o2[c] + MMb[c]                     | 0     | 1000 |                                                                              | Moose metabolic/transport demand<br>reaction |
| MMFYDXK       | MMap[c] + MMpdc[c] > MMad[c] + MMb[c] + MMpdc5p[c]                        | 0     | 1000 | 11761.1                                                                      | Moose metabolic/transport demand<br>reaction |
| MMFYDXNK      | MMap[c] + MMpdc[c] > MMad[c] + MMb[c] + MMpdc5p[c]                        | 0     | 1000 | 216134.1                                                                     | Moose metabolic/transport demand<br>reaction |
| MMFYDXNr      | MMpdc5p[c] <=> MMpdc5p[c]                                                 | 0     | 1000 | 216134.1                                                                     | Moose metabolic/transport demand<br>reaction |
| MMFYDXPP      | MMb2o[c] + MMpdc5p[c] > MMp[c] + MMpdc5p[c]                               | 0     | 1000 |                                                                              | Moose metabolic/transport demand<br>reaction |
| MMFYDXr       | MMpdc5p[c] <=> MMpdc5p[c]                                                 | 0     | 1000 | 57028.1                                                                      | Moose metabolic/transport demand<br>reaction |
| MMFYK         | MMad[c] + MMb[c] + MMpp[c] > MMad[c] + MMpp[c]                            | 0     | 1000 |                                                                              | Moose metabolic/transport demand<br>reaction |
| MMFYALDOX     | MMb2o[c] + MMb2o2[c] + MMpp[c] > 2 MMb[c] + MMb[c]                        | 0     | 1000 | 18746.1 or 66260.1 or 18770.1 or 18746.2 or 18770.2 or 18746.3               | Moose metabolic/transport demand<br>reaction |
| MMFYALDOXm    | MMb2o[m] + MMb2o2[m] + MMpp[m] > 2 MMb[m] + MMb[m]                        | 0     | 1000 | 19378.1 or 5052.1 or 110995.1 or 11668.1 or 11671.1 or 19378.2 or 19378.3    | Moose metabolic/transport demand<br>reaction |
| MMFYPN2r      | MMp[c] + MMar[c] <=> MMar[c] + MMp[c]                                     | -1000 | 1000 | 11669.1 or 212647.1 or 212647.2 or 72535.1                                   | Moose metabolic/transport demand<br>reaction |
| MMFYR2m       | MMb[c] + MMpp[c] <=> MMb[m] + MMpp[m]                                     | -1000 | 1000 | 22271.1 or 22271.2 or 76654.1                                                | Moose metabolic/transport demand<br>reaction |
| MMFYR2p       | MMb[c] + MMpp[c] <=> MMb[p] + MMpp[p]                                     | -1000 | 1000 | 20501.1                                                                      | Moose metabolic/transport demand<br>reaction |
| MMFYR2r       | MMb[c] + MMpp[c] <=> MMb[c] + MMpp[c]                                     | -1000 | 1000 | 20503.1 or 20501.1                                                           | Moose metabolic/transport demand<br>reaction |
| MMQILSYN      | MMco[m] > MMb2o[c] + MMb[c] + MMp[c]                                      | 0     | 1000 | 20503.1 or 80879.1 or 20501.1                                                | Moose metabolic/transport demand<br>reaction |
| MMRADH        | MMb2o[c] + MMad[c] + MMreai[c] <=> 2 MMb[c] + MMreai[c]                   | -1000 | 1000 |                                                                              | Moose metabolic/transport demand<br>reaction |
| MMRADH2       | MMb2o[c] + MMad[c] + MMreai[c] <=> 2 MMb[c] + MMreai[c]                   | 0     | 1000 |                                                                              | Moose metabolic/transport demand<br>reaction |
| MMRADH3       | MMb2o[c] + MMad[c] + MMreai-cis-13[c] <=> 2 MMb[c] + MMreai-cis-9[c]      | -1000 | 1000 |                                                                              | Moose metabolic/transport demand<br>reaction |
| MMRADH4       | MMb2o[c] + MMad[c] + MMreai-cis-13[c] <=> 2 MMb[c] + MMreai-cis-9[c]      | 0     | 1000 |                                                                              | Moose metabolic/transport demand<br>reaction |
| MMRAH1        | MMb2o[c] + MMb[c] + MMreai[c] > MMb2o[c] + MMreai[c]                      | 0     | 1000 |                                                                              | Moose metabolic/transport demand<br>reaction |
| MMRAH1        | MMreai[c] <=> MMreai-11-cis[c]                                            | -1000 | 1000 |                                                                              | Moose metabolic/transport demand<br>reaction |
| MMRAH2        | MMreai[c] <=> MMreai-cis-9[c]                                             | -1000 | 1000 |                                                                              | Moose metabolic/transport demand<br>reaction |
| MMRAH3        | MMreai[c] <=> MM13-cis-ret[c]                                             | -1000 | 1000 |                                                                              | Moose metabolic/transport demand<br>reaction |
| MMRAH4        | MMreai[c] <=> MM13-cis-ret[c]                                             | -1000 | 1000 |                                                                              | Moose metabolic/transport demand<br>reaction |
| MMRAH5        | MMreai[c] <=> MM13-cis-ret[c]                                             | -1000 | 1000 |                                                                              | Moose metabolic/transport demand<br>reaction |
| MMRBK         | MMap[c] + MMb-D[c] > MMad[c] + MMb[c] + MMb5p[c]                          | 0     | 1000 |                                                                              | Moose metabolic/transport demand<br>reaction |
| MMRBK_D       | MMap[c] + MMb-D[c] > MMad[c] + MMb[c] + MMb5p-D[c]                        | 0     | 1000 | 71336.1                                                                      | Moose metabolic/transport demand<br>reaction |
| MMRBH1        | MMb[c] > MMb[c]                                                           | 0     | 1000 |                                                                              | Moose metabolic/transport demand<br>reaction |
| MMRBH1        | MMad[c] + MMreai[c] <=> MMb[c] + MMad[c] + MMreai[c]                      | -1000 | 1000 |                                                                              | Moose metabolic/transport demand<br>reaction |
| MMRBH1a       | MMad[c] + MMreai[c] <=> MMb[c] + MMad[c] + MMreai[c]                      | 0     | 1000 | 107605.1 or 19682.1                                                          | Moose metabolic/transport demand<br>reaction |
| MMRBH2        | MMad[c] + MMreai-cis-9[c] <=> MMb[c] + MMad[c] + MMreai-cis-9[c]          | -1000 | 1000 | 105014.1 or 235033.1 or 99711.1 or 108841.1 or 242285.1 or 17252.1 or 7974.1 | Moose metabolic/transport demand<br>reaction |
| MMRBH2a       | MMad[c] + MMreai-cis-9[c] <=> MMb[c] + MMad[c] + MMreai-cis-9[c]          | 0     | 1000 | 19682.1                                                                      | Moose metabolic/transport demand<br>reaction |
| MMRBH3        | MMad[c] + MMreai-cis-11[c] <=> MMb[c] + MMad[c] + MMreai-11-cis[c]        | -1000 | 1000 | 105014.1 or 235033.1 or 108841.1 or 242285.1 or 17252.1 or 7974.1            | Moose metabolic/transport demand<br>reaction |
| MMRBH3a       | MMad[c] + MMreai-cis-11[c] <=> MMb[c] + MMad[c] + MMreai-11-cis[c]        | 0     | 1000 | 19682.1                                                                      | Moose metabolic/transport demand<br>reaction |
| MMRBH4        | MMad[c] + MMreai-cis-13[c] <=> MMb[c] + MMad[c] + MMreai-cis-13[c]        | -1000 | 1000 | 105014.1 or 108841.1 or 242285.1 or 17252.1 or 7974.1                        | Moose metabolic/transport demand<br>reaction |
| MMRE266GG     | MMadp[g] + MMpdc,3s[g] > MMb[g] + MMadp[g] + MMpdc,3s[g]                  | 0     | 1000 | 19682.1                                                                      | Moose metabolic/transport demand<br>reaction |
| MMRETPA       | MMb2o2o[c] + MMreai[c] > MMco[c] + MMreai[c]                              | 0     | 1000 |                                                                              | Moose metabolic/transport demand<br>reaction |

[illegible]

[illegible]

|               |  |                                                                                                     |       |      |  |                                                          |                                           |
|---------------|--|-----------------------------------------------------------------------------------------------------|-------|------|--|----------------------------------------------------------|-------------------------------------------|
| MMSIASMeTh    |  | $MM_{base}(c) \leftrightarrow MM_{base}(n)$                                                         | -1000 | 1000 |  |                                                          | Moose metabolic/transport demand reaction |
| MMSIADT       |  | $MM_{map}(c) \leftrightarrow MM_{loc}(c) \leftrightarrow MM_{pp}(c) \leftrightarrow MM_{lab}(c)$    | 0     | 1000 |  |                                                          | Moose metabolic/transport demand reaction |
| MMSIACYSLY    |  | $MM_{b}(c) + MM_{cyl}(c) \rightarrow MM_{b}(c) + MM_{lab}(L) + MM_{b}(CO_2)(c)$                     | 0     | 1000 |  | 23972.1 or 23971.1                                       | Moose metabolic/transport demand reaction |
| MMSIACYSLY2   |  | $MM_{psh}(c) + MM_{cyl}(c) \rightarrow MM_{b}(c) + MM_{lab}(L) + MM_{b}(CO_2)(c) + MM_{b}(c)$       | 0     | 1000 |  | 5080.1                                                   | Moose metabolic/transport demand reaction |
| MMSIACYSTGL   |  | $MM_{b2}(c) + MM_{cyl}(c) \rightarrow MM_{b}(c) + MM_{b2}(c) + MM_{cyl}(c)$                         | 0     | 1000 |  | 5080.1                                                   | Moose metabolic/transport demand reaction |
| MMSIACYSTS    |  | $MM_{bser-L}(c) + MM_{cyl}(c) \rightarrow MM_{b2}(c) + MM_{cyl}(c)$                                 | 0     | 1000 |  | 107869.1 or 107869.2                                     | Moose metabolic/transport demand reaction |
| MMSIABITAT    |  | $MM_{b2}(c) + MM_{map}(c) + MM_{cheat}(c) \rightarrow MM_{b2}(c) + MM_{pp}(c) + MM_{cheat}(c)$      | 0     | 1000 |  | 1241.1                                                   | Moose metabolic/transport demand reaction |
| MMSIENPS      |  | $MM_{b2}(c) + MM_{map}(c) + MM_{cheat}(c) \rightarrow MM_{pp}(c) + MM_{map}(c) + MM_{b2}(c)$        | 0     | 1000 |  | 232087.1 and 108645.1 or 108645.2 and 232087.1 or 1170.1 | Moose metabolic/transport demand reaction |
| MMSIEJ4_3     |  | $3 MM_{ma}(c) + MM_{loc}(c) \leftrightarrow 3 MM_{ma}(c) + MM_{loc}(c)$                             | 0     | 1000 |  | 190979.1 or 20768.1                                      | Moose metabolic/transport demand reaction |
| MMSIERALANa   |  | $MM_{ma}(c) + MM_{lab-L}(c) + MM_{ser-L}(c) \rightarrow MM_{ma}(c) + MM_{lab-L}(c) + MM_{ser-L}(c)$ | 0     | 1000 |  | 55961.1                                                  | Moose metabolic/transport demand reaction |
| MMSIERALANa   |  | $MM_{ma}(c) + MM_{ma-L}(c) + MM_{ser-L}(c) \rightarrow MM_{ma}(c) + MM_{ma-L}(c) + MM_{ser-L}(c)$   | 0     | 1000 |  | 20514.1 or 55963.1                                       | Moose metabolic/transport demand reaction |
| MMSIERATb0c   |  | $2 MM_{ma}(n) + MM_{c}(u) + MM_{ser-L}(c) \rightarrow 2 MM_{ma}(c) + MM_{c}(u) + MM_{ser-L}(c)$     | 0     | 1000 |  | 20514.1                                                  | Moose metabolic/transport demand reaction |
| MMSERBOAT1c   |  | $MM_{ma}(n) + MM_{ser-L}(u) \rightarrow MM_{ma}(c) + MM_{ser-L}(c)$                                 | 0     | 1000 |  | 56774.1                                                  | Moose metabolic/transport demand reaction |
| MMSERYSSNa    |  | $MM_{ma}(c) + MM_{cyl-L}(c) + MM_{cyl-L}(c) \rightarrow MM_{ma}(c) + MM_{cyl-L}(c) + MM_{cyl-L}(c)$ | 0     | 1000 |  | (70008.1 or 74338.1 and 57394.1)                         | Moose metabolic/transport demand reaction |
| MMSERDGLNc    |  | $MM_{b}(c) + MM_{b2}(c) \rightarrow MM_{b}(c) + MM_{b2}(c)$                                         | -1000 | 1000 |  | 20514.1 or 55963.1                                       | Moose metabolic/transport demand reaction |
| MMSERDGLYc    |  | $MM_{b}(c) + MM_{b2}(c) \rightarrow MM_{b}(c) + MM_{b2}(c)$                                         | -1000 | 1000 |  | 53896.1 or 17254.1                                       | Moose metabolic/transport demand reaction |
| MMSERGLNNa    |  | $MM_{ma}(c) + MM_{b}(c) + MM_{ser-L}(c) \rightarrow MM_{ma}(c) + MM_{b}(c) + MM_{ser-L}(c)$         | 0     | 1000 |  | 53896.1 or 17254.1                                       | Moose metabolic/transport demand reaction |
| MMSERGLNc     |  | $MM_{b}(c) + MM_{ser-L}(c) \rightarrow MM_{b}(c) + MM_{ser-L}(c)$                                   | -1000 | 1000 |  | 20514.1                                                  | Moose metabolic/transport demand reaction |
| MMSERGLYALaGY |  | $MM_{ser-Gb_Ab_X_Gb}(c) \rightarrow MM_{ser-Gb_Ab_X_Gb}(c)$                                         | 0     | 1000 |  | 53896.1 or 17254.1                                       | Moose metabolic/transport demand reaction |
| MMSERGLYc     |  | $MM_{b}(c) + MM_{ser-L}(c) \rightarrow MM_{b}(c) + MM_{ser-L}(c)$                                   | -1000 | 1000 |  |                                                          | Moose metabolic/transport demand reaction |
| MMSERHL       |  | $MM_{ser-L}(c) \rightarrow MM_{b2}(c) + MM_{b2}(c)$                                                 | 0     | 1000 |  | 53896.1 or 17254.1                                       | Moose metabolic/transport demand reaction |
| MMSERELAT2c   |  | $MM_{b}(c) + MM_{ser-L}(c) \rightarrow MM_{b}(c) + MM_{ser-L}(c)$                                   | 0     | 1000 |  | 231691.1                                                 | Moose metabolic/transport demand reaction |
| MMSERLYSSNa   |  | $MM_{ma}(n) + MM_{ser-L}(c) + MM_{b}(c) \rightarrow MM_{ma}(c) + MM_{ser-L}(c) + MM_{b}(c)$         | 0     | 1000 |  | (20539.1 and 17254.1)                                    | Moose metabolic/transport demand reaction |
| MMSERPLAT2c   |  | $MM_{b}(c) + MM_{ser-L}(c) \rightarrow MM_{b}(c) + MM_{ser-L}(c)$                                   | 0     | 1000 |  | 20540.1 and 20532.1                                      | Moose metabolic/transport demand reaction |
| MMSERPT       |  | $MM_{b}(c) + MM_{ser-L}(c) + MM_{pp}(c) \rightarrow MM_{b}(c) + MM_{ser-L}(c) + MM_{pp}(c)$         | 0     | 1000 |  | (20539.1 and 17254.1)                                    | Moose metabolic/transport demand reaction |
| MMSERTbNa     |  | $MM_{ma}(n) + MM_{ser-L}(c) + MM_{b}(c) \rightarrow MM_{ma}(c) + MM_{ser-L}(c) + MM_{b}(c)$         | 0     | 1000 |  | 20773.1 and 206656.1                                     | Moose metabolic/transport demand reaction |
| MMSERb4       |  | $MM_{ma}(n) + MM_{ser-L}(c) \rightarrow MM_{ma}(c) + MM_{ser-L}(c)$                                 | 0     | 1000 |  | 20514.1 or 55963.1                                       | Moose metabolic/transport demand reaction |
| MMSERN1       |  | $MM_{b}(c) + 2 MM_{ma}(c) + MM_{ser-L}(c) \rightarrow MM_{b}(c) + 2 MM_{ma}(c) + MM_{ser-L}(c)$     | -1000 | 1000 |  | 105727.1 or 67760.1 or 69354.1 or 56774.1                | Moose metabolic/transport demand reaction |
| MMSERp        |  | $MM_{ser-L}(c) \rightarrow MM_{ser-L}(c)$                                                           | -1000 | 1000 |  | 209837.1                                                 | Moose metabolic/transport demand reaction |
| MMSFGTH       |  | $MM_{b2}(c) + MM_{b2}(c) \rightarrow MM_{b}(c) + MM_{b2}(c)$                                        | -1000 | 1000 |  |                                                          | Moose metabolic/transport demand reaction |
| MMSGALSIDb    |  | $MM_{b2}(c) + MM_{b2}(c) \rightarrow MM_{b2}(c) + MM_{b2}(c)$                                       | -1000 | 1000 |  | 13885.1                                                  | Moose metabolic/transport demand reaction |
| MMSGALSIDb    |  | $MM_{b2}(c) + MM_{b2}(c) \rightarrow MM_{b2}(c) + MM_{b2}(c)$                                       | -1000 | 1000 |  |                                                          | Moose metabolic/transport demand reaction |
| MMSGPL1r      |  | $MM_{b}(p) \rightarrow MM_{cheat}(p) + MM_{b2}(c)$                                                  | 0     | 1000 |  |                                                          | Moose metabolic/transport demand reaction |
| MMSGPL1z      |  | $MM_{b2}(c) + MM_{b2}(p) \rightarrow MM_{b}(c) + MM_{cheat}(p) + MM_{b2}(c)$                        | 0     | 1000 |  | 20397.1                                                  | Moose metabolic/transport demand reaction |
| MMSIAASE      |  | $2 MM_{b2}(c) + MM_{b2}(c) \rightarrow 2 MM_{b2}(c) + MM_{b2}(c)$                                   | 0     | 1000 |  | 20397.1                                                  | Moose metabolic/transport demand reaction |
| MMSIASE2b     |  | $MM_{b2}(c) + MM_{b2}(c) \rightarrow MM_{b2}(c) + MM_{b2}(c)$                                       | 0     | 1000 |  | 241159.1 or 23596.1                                      | Moose metabolic/transport demand reaction |
| MMSIASE3b     |  | $MM_{b2}(c) + MM_{b2}(c) \rightarrow MM_{b2}(c) + MM_{b2}(c)$                                       | 0     | 1000 |  | 50917.1 or 19025.1 or 12091.1 or 18010.1                 | Moose metabolic/transport demand reaction |
| MMSIASE4b     |  | $MM_{b2}(c) + MM_{b2}(c) \rightarrow MM_{b2}(c) + MM_{b2}(c)$                                       |       |      |  |                                                          |                                           |

|               |                                                                                   |       |      |                                                                |                                              |
|---------------|-----------------------------------------------------------------------------------|-------|------|----------------------------------------------------------------|----------------------------------------------|
| MM5QL5r       | $MMb(r) + MMmup(r) + 2 MMhd(r) \rightarrow MMmup(r) + 2 MMhd(r) + MMmup(r)$       | 0     | 1000 | 20775.1                                                        | Mouse metabolic/transport demand<br>reaction |
| MM5R5AR2r     | $MMb(r) + MMmup(r) + MMmup(r) \rightarrow MMmup(r) + MMmup(r)$                    | 0     | 1000 | 14137.1                                                        | Mouse metabolic/transport demand<br>reaction |
| MM5R5ARr      | $MMb(r) + MMmup(r) + MMmup(r) \rightarrow MMmup(r) + MMmup(r)$                    | 0     | 1000 | 94224.1 or 78925.1                                             | Mouse metabolic/transport demand<br>reaction |
| MM5RTN20X     | $MMb(c) + MMmup(c) \rightarrow MMmup(c)$                                          | 0     | 1000 | 94224.1 or 78925.1                                             | Mouse metabolic/transport demand<br>reaction |
| MM5RTNACT     | $MMmup(c) + MMmup(c) \rightarrow MMb(c) + MMmup(c)$                               | 0     | 1000 | 15930.1                                                        | Mouse metabolic/transport demand<br>reaction |
| MM5RTNMTX     | $MMmup(c) + MMmup(c) \rightarrow MMb(c) + MMmup(c)$                               | 0     | 1000 | 11298.1                                                        | Mouse metabolic/transport demand<br>reaction |
| MM5RTN6_2_r   | $2 MMmup(c) + 2 MMmup(c) \rightarrow 2 MMmup(c) + 2 MMmup(c)$                     | 0     | 1000 | 21743.1                                                        | Mouse metabolic/transport demand<br>reaction |
| MM5RTNu       | $MMmup(c) \leftrightarrow MMmup(c)$                                               | 0     | 1000 | 15567.1                                                        | Mouse metabolic/transport demand<br>reaction |
| MM5SALm       | $MMb(m) + MMmup(m) + MMmup(m) \rightarrow 2 MMmup(m) + MMmup(m) + MMmup(m)$       | 0     | 1000 | 20518.1 or 20517.1 or 20518.2                                  | Mouse metabolic/transport demand<br>reaction |
| MM5TGAL21g    | $MMmup(g) + MMmup(g) \rightarrow MMb(g) + MMmup(g)$                               | 0     | 1000 | 214579.1 or 214579.2                                           | Mouse metabolic/transport demand<br>reaction |
| MM5TGAL22g    | $MMmup(g) + MMmup(g) \rightarrow MMb(g) + MMmup(g)$                               | 0     | 1000 | 20444.1                                                        | Mouse metabolic/transport demand<br>reaction |
| MM5TGAL23g    | $MMmup(g) + MMmup(g) \rightarrow MMb(g) + MMmup(g)$                               | 0     | 1000 | 20444.1                                                        | Mouse metabolic/transport demand<br>reaction |
| MM5TGAL61g    | $MMmup(g) + MMmup(g) \rightarrow MMb(g) + MMmup(g)$                               | 0     | 1000 | 20444.1                                                        | Mouse metabolic/transport demand<br>reaction |
| MM5TGAL62g    | $MMmup(g) + MMmup(g) \rightarrow MMb(g) + MMmup(g)$                               | 0     | 1000 | 54613.1                                                        | Mouse metabolic/transport demand<br>reaction |
| MM5TGALNAC21  | $MMmup(n) + MMmup(n) \rightarrow MMb(n) + MMmup(n)$                               | 0     | 1000 | 54613.1                                                        | Mouse metabolic/transport demand<br>reaction |
| MM5TGALNAC22  | $MMmup(n) + MMmup(n) \rightarrow MMb(n) + MMmup(n)$                               | 0     | 1000 | 20446.1                                                        | Mouse metabolic/transport demand<br>reaction |
| MM5TGALNAC23  | $MMmup(n) + MMmup(n) \rightarrow MMb(n) + MMmup(n)$                               | 0     | 1000 | 20446.1                                                        | Mouse metabolic/transport demand<br>reaction |
| MM5TGALNAC24  | $MMmup(n) + MMmup(n) \rightarrow MMb(n) + MMmup(n)$                               | 0     | 1000 | 20446.1                                                        | Mouse metabolic/transport demand<br>reaction |
| MM5TGALNAC25  | $MMmup(n) + MMmup(n) \rightarrow MMb(n) + MMmup(n)$                               | 0     | 1000 | 20446.1                                                        | Mouse metabolic/transport demand<br>reaction |
| MM5TGALNAC26  | $MMmup(n) + MMmup(n) \rightarrow MMb(n) + MMmup(n)$                               | 0     | 1000 | 50935.1                                                        | Mouse metabolic/transport demand<br>reaction |
| MM5TGALNAC27  | $MMmup(n) + MMmup(n) \rightarrow MMb(n) + MMmup(n)$                               | 0     | 1000 | 20446.1                                                        | Mouse metabolic/transport demand<br>reaction |
| MM5TGALNAC28  | $MMmup(n) + MMmup(n) \rightarrow MMb(n) + MMmup(n)$                               | 0     | 1000 | 20446.1                                                        | Mouse metabolic/transport demand<br>reaction |
| MM5TGALNAC31  | $MMmup(n) + MMmup(n) \rightarrow MMb(n) + MMmup(n)$                               | 0     | 1000 | 20446.1                                                        | Mouse metabolic/transport demand<br>reaction |
| MM5TGALNAC61  | $MMmup(n) + MMmup(n) \rightarrow MMb(n) + MMmup(n)$                               | 0     | 1000 | 50935.1 or 20938.1 or 20447.1                                  | Mouse metabolic/transport demand<br>reaction |
| MM5TGALNAC62  | $MMmup(n) + MMmup(n) \rightarrow MMb(n) + MMmup(n)$                               | 0     | 1000 | 20446.1                                                        | Mouse metabolic/transport demand<br>reaction |
| MM5T8SIA1     | $MMmup(s) + MMmup(s) \rightarrow MMb(s) + MMmup(s)$                               | 0     | 1000 | 50935.1                                                        | Mouse metabolic/transport demand<br>reaction |
| MM5T8SIA2     | $MMmup(s) + MMmup(s) \rightarrow MMb(s) + MMmup(s)$                               | 0     | 1000 | 20449.1                                                        | Mouse metabolic/transport demand<br>reaction |
| MM5T8SIA51g   | $MMmup(s) + MMmup(s) \rightarrow MMb(s) + MMmup(s)$                               | 0     | 1000 | 20449.1                                                        | Mouse metabolic/transport demand<br>reaction |
| MM5T8SIA52g   | $MMmup(s) + MMmup(s) \rightarrow MMb(s) + MMmup(s)$                               | 0     | 1000 | 225742.1                                                       | Mouse metabolic/transport demand<br>reaction |
| MM5T8SIA53g   | $MMmup(s) + MMmup(s) \rightarrow MMb(s) + MMmup(s)$                               | 0     | 1000 | 225742.1                                                       | Mouse metabolic/transport demand<br>reaction |
| MM5T8SIA54g   | $MMmup(s) + MMmup(s) \rightarrow MMb(s) + MMmup(s)$                               | 0     | 1000 | 225742.1                                                       | Mouse metabolic/transport demand<br>reaction |
| MM5T8SIA55g   | $MMmup(s) + MMmup(s) \rightarrow MMb(s) + MMmup(s)$                               | 0     | 1000 | 225742.1                                                       | Mouse metabolic/transport demand<br>reaction |
| MM5T8SIA56g   | $MMmup(s) + MMmup(s) \rightarrow MMb(s) + MMmup(s)$                               | 0     | 1000 | 225742.1                                                       | Mouse metabolic/transport demand<br>reaction |
| MM5TCOAu      | $MMmup(c) \leftrightarrow MMmup(c)$                                               | -1000 | 1000 | 225742.1                                                       | Mouse metabolic/transport demand<br>reaction |
| MM5Tn_ANTIGEn | $MMmup(c) \leftrightarrow MMmup(c)$                                               | 0     | 1000 |                                                                | Mouse metabolic/transport demand<br>reaction |
| MM5TRNCPT1    | $MMmup(c) + MMmup(c) \rightarrow MMmup(c) + MMmup(c)$                             | 0     | 1000 |                                                                | Mouse metabolic/transport demand<br>reaction |
| MM5TRNCPT2    | $MMmup(c) + MMmup(c) \rightarrow MMmup(c) + MMmup(c)$                             | 0     | 1000 | 12895.4 or 12894.1 or 78070.1 or 12895.2 or 12895.3 or 12895.1 | Mouse metabolic/transport demand<br>reaction |
| MM5TRNCPTN    | $MMmup(c) \rightarrow MMmup(c)$                                                   | 0     | 1000 | 12896.1                                                        | Mouse metabolic/transport demand<br>reaction |
| MM5TRNDC1     | $MMmup(c) \leftrightarrow MMmup(c)$                                               | 0     | 1000 | 57279.1                                                        | Mouse metabolic/transport demand<br>reaction |
| MM5UCC2m      | $MMmup(m) + MMmup(m) \leftrightarrow MMmup(m) + MMmup(m)$                         | -1000 | 1000 |                                                                | Mouse metabolic/transport demand<br>reaction |
| MM5UCC4_2     | $2 MMmup(m) + MMmup(m) \leftrightarrow 2 MMmup(m) + MMmup(m)$                     | 0     | 1000 | 27376.1                                                        | Mouse metabolic/transport demand<br>reaction |
| MM5UCC4_3     | $3 MMmup(m) + MMmup(m) \leftrightarrow 3 MMmup(m) + MMmup(m)$                     | 0     | 1000 | 20500.1                                                        | Mouse metabolic/transport demand<br>reaction |
| MM5UCCp       | $MMmup(c) \leftrightarrow MMmup(c)$                                               | -1000 | 1000 | 114644.1 or 114644.2                                           | Mouse metabolic/transport demand<br>reaction |
| MM5UCD1m      | $MMmup(m) + MMmup(m) \leftrightarrow MMmup(m) + MMmup(m)$                         | -1000 | 1000 |                                                                | Mouse metabolic/transport demand<br>reaction |
| MM5UCOA51m    | $MMmup(m) + MMmup(m) + MMmup(m) \leftrightarrow MMmup(m) + MMmup(m) + MMmup(m)$   | -1000 | 1000 | 60945.1 and 60952.1 and 67080.1 and 60925.1                    | Mouse metabolic/transport demand<br>reaction |
| MM5UCOA5m     | $MMmup(m) + MMmup(m) + MMmup(m) \leftrightarrow MMmup(m) + MMmup(m) + MMmup(m)$   | -1000 | 1000 | 20917.1 and 56451.1                                            | Mouse metabolic/transport demand<br>reaction |
| MM5UCRr       | $MMmup(c) + MMmup(c) \rightarrow MMmup(c) + MMmup(c)$                             | 0     | 1000 | 56451.1 and 50916.1                                            | Mouse metabolic/transport demand<br>reaction |
| MM5ULFOX      | $MMmup(c) + MMmup(c) + 2 MMmup(c) \rightarrow 2 MMmup(c) + 2 MMmup(c) + MMmup(c)$ | 0     | 1000 | 232714.1 or 69983.1                                            | Mouse metabolic/transport demand<br>reaction |
| MM5Ser_Thr1g  | $MMmup(c) \rightarrow MMmup(c)$                                                   | -1000 | 1000 | 211389.1                                                       | Mouse metabolic/transport demand<br>reaction |
| MM5T2M2COAHLm | $MMmup(m) + MMmup(m) \rightarrow MMmup(m) + MMmup(m)$                             | -1000 | 1000 |                                                                | Mouse metabolic/transport demand<br>reaction |
| MM5T2M2COAHLx | $MMmup(m) + MMmup(m) \rightarrow MMmup(m) + MMmup(m)$                             | -1000 | 1000 | 11992.1 or 231086.1 or 97212.1                                 | Mouse metabolic/transport demand<br>reaction |
| MM5T4HCINMFM  | $MMmup(m) \rightarrow MMmup(m) + MMmup(m)$                                        | 0     | 1000 | 7447.1 or 51798.1                                              | Mouse metabolic/transport demand<br>reaction |
| MM5T4HCINNOX  | $MMmup(c) + 2 MMmup(c) \rightarrow 2 MMmup(c) + MMmup(c)$                         | 0     | 1000 |                                                                | Mouse metabolic/transport demand<br>reaction |
| MM5TAGAT_Dr   | $MMmup(Dr) \rightarrow MMmup(Dr)$                                                 | 0     | 1000 | 22173.1                                                        | Mouse metabolic/transport demand<br>reaction |
| MM5TAGHSTDr   | $MMmup(Dr) \rightarrow MMmup(Dr)$                                                 | 0     | 1000 |                                                                | Mouse metabolic/transport demand<br>reaction |
| MM5TAGr       | $MMmup(Dr) \leftrightarrow MMmup(Dr)$                                             | -1000 | 1000 |                                                                | Mouse metabolic/transport demand<br>reaction |
| MM5TALA       | $MMmup(c) + MMmup(c) \leftrightarrow MMmup(c) + MMmup(c)$                         | -1000 | 1000 |                                                                | Mouse metabolic/transport demand<br>reaction |
| MM5TAUBETAr   | $2 MMmup(c) + MMmup(c) + MMmup(c) \rightarrow 2 MMmup(c) + MMmup(c) + MMmup(c)$   | 0     | 1000 | 21351.1                                                        | Mouse metabolic/transport demand<br>reaction |
| MM5TAUPAT1c   | $MMmup(c) + MMmup(c) \rightarrow MMmup(c) + MMmup(c)$                             | 0     | 1000 | 21366.1                                                        | Mouse metabolic/transport demand<br>reaction |
| MM5TAR6_2_r   | $2 MMmup(c) + MMmup(c) \leftrightarrow 2 MMmup(c) + MMmup(c)$                     | 0     | 1000 | 215335.1                                                       | Mouse metabolic/transport demand<br>reaction |
| MM5TAR6x      | $MMmup(c) + MMmup(c) \leftrightarrow MMmup(c) + MMmup(c)$                         | -1000 | 1000 | 21366.1                                                        | Mouse metabolic/transport demand<br>reaction |
| MM5TAXOLr     | $MMmup(c) \leftrightarrow MMmup(c)$                                               | 0     | 1000 | 21366.1                                                        | Mouse metabolic/transport demand<br>reaction |
| MM5TCHOL2g    | $2 MMmup(g) + MMmup(g) \rightarrow 2 MMmup(g) + MMmup(g)$                         | 0     | 1000 |                                                                | Mouse metabolic/transport demand<br>reaction |
| MM5TCHOL3g    | $MMmup(g) + MMmup(g) + MMmup(g) \rightarrow MMmup(g) + MMmup(g) + MMmup(g)$       | 0     | 1000 | 20494.1 or 20493.1                                             | Mouse metabolic/transport demand<br>reaction |
| MM5TCHOL4g    | $MMmup(g) \leftrightarrow MMmup(g)$                                               | -1000 | 1000 | 27413.1 or 76408.2 or 76408.3 or 76408.1                       | Mouse metabolic/transport demand<br>reaction |
| MM5TCHOL4x    | $MMmup(g) \leftrightarrow MMmup(g)$                                               | -1000 | 1000 |                                                                | Mouse metabolic/transport demand<br>reaction |
| MM5TCYN1r     | $MMmup(c) \rightarrow MMmup(c)$                                                   | 0     | 1000 |                                                                | Mouse metabolic/transport demand<br>reaction |
| MM5TCYN2m     | $MMmup(m) \rightarrow MMmup(m)$                                                   | 0     | 1000 |                                                                | Mouse metabolic/transport demand<br>reaction |
| MM5TCHOL4u    | $MMmup(c) \leftrightarrow MMmup(c)$                                               | -1000 | 1000 |                                                                | Mouse metabolic/transport demand<br>reaction |
| MM5TCHOL4x    | $MMmup(c) \leftrightarrow MMmup(c)$                                               | -1000 | 1000 |                                                                | Mouse metabolic/transport demand<br>reaction |
| MM5TCHOL4u    | $MMmup(c) \leftrightarrow MMmup(c)$                                               | -1000 | 1000 |                                                                | Mouse metabolic/transport demand<br>reaction |
| MM5TCHOL4u    | $MMmup(c) \leftrightarrow MMmup(c)$                                               | -1000 | 1000 |                                                                | Mouse metabolic/transport demand<br>reaction |
| MM5TDP        | $MMmup(c) + MMmup(c) \rightarrow MMmup(c) + MMmup(c)$                             | 0     | 1000 |                                                                | Mouse metabolic/transport demand<br>reaction |
| MM5TDPORR     | $MMmup(c) + MMmup(c) \rightarrow MMmup(c) + MMmup(c)$                             | 0     | 1000 |                                                                | Mouse metabolic/transport demand<br>reaction |
| MM5TDPORR     | $MMmup(c) + MMmup(c) \rightarrow MMmup(c) + MMmup(c)$                             | 0     | 1000 |                                                                | Mouse metabolic/transport demand<br>reaction |
| MM5TDPORR     | $MMmup(c) \rightarrow MMmup(c)$                                                   | 0     | 1000 |                                                                | Mouse metabolic/transport demand<br>reaction |
| MM5TDPm       | $MMmup(m) + MMmup(m) \rightarrow MMmup(m) + MMmup(m)$                             | 0     | 1000 | 76355.1                                                        | Mouse metabolic/transport demand<br>reaction |
| MM5TETH3COAu  | $MMmup(c) \leftrightarrow MMmup(c)$                                               | -1000 | 1000 |                                                                | Mouse metabolic/transport demand<br>reaction |
| MM5TETH3c     | $MMmup(c) \leftrightarrow MMmup(c)$                                               | 0     | 1000 |                                                                | Mouse metabolic/transport demand<br>reaction |
| MM5TETH3COAu  | $MMmup(c) \leftrightarrow MMmup(c)$                                               | -1000 | 1000 |                                                                | Mouse metabolic/transport demand<br>reaction |
| MM5TETH3CPT1  | $MMmup(c) + MMmup(c) \rightarrow MMmup(c) + MMmup(c)$                             | 0     | 1000 |                                                                | Mouse metabolic/transport demand<br>reaction |
| MM5TETH3CPT2  | $MMmup(c) + MMmup(c) \rightarrow MMmup(c) + MMmup(c)$                             | 0     | 1000 | 12895.4 or 12894.1 or 78070.1 or 12895.2 or 12895.3 or 12895.1 | Mouse metabolic/transport demand<br>reaction |
| MM5TETH3CPTN  | $MMmup(c) \rightarrow MMmup(c)$                                                   | 0     | 1000 | 12896.1                                                        | Mouse metabolic/transport demand<br>reaction |
| MM5TETH3T     | $MMmup(c) \leftrightarrow MMmup(c)$                                               | 0     | 1000 | 57279.1                                                        | Mouse metabolic/transport demand<br>reaction |

|                  |                                                                        |       |      |                                                                |                                              |
|------------------|------------------------------------------------------------------------|-------|------|----------------------------------------------------------------|----------------------------------------------|
| MMTEPENTGCOAs    | MMtepentcoas[c] <=> MMtepentcoas[s]                                    | -1000 | 1000 |                                                                | Mouse metabolic/transport demand<br>reaction |
| MMTEPENTGCTP1    | MMctn[c] + MMtepentcoas[c] -> MMctn[c] + MMtepentcm[c]                 | 0     | 1000 |                                                                | Mouse metabolic/transport demand<br>reaction |
| MMTEPENTGCTP2    | MMcoas[n] + MMtepentcm[n] -> MMctn[n] + MMtepentcoas[n]                | 0     | 1000 | 12895.4 or 12894.1 or 78070.1 or 12895.2 or 12895.3 or 12895.1 | Mouse metabolic/transport demand<br>reaction |
| MMTEPENTGCRN1    | MMtepentcm[c] -> MMtepentcm[n]                                         | 0     | 1000 | 12896.1                                                        | Mouse metabolic/transport demand<br>reaction |
| MMTEPENTG6       | MMtepent[c] <=> MMtepent[c]                                            | 0     | 1000 | 57279.1                                                        | Mouse metabolic/transport demand<br>reaction |
| MMTEPENTGCOAs    | MMtepentcoas[c] <=> MMtepentcoas[s]                                    | -1000 | 1000 |                                                                | Mouse metabolic/transport demand<br>reaction |
| MMTEPENTGCTP1    | MMctn[c] + MMtepentcoas[c] -> MMcoas[c] + MMtepentcm[c]                | 0     | 1000 |                                                                | Mouse metabolic/transport demand<br>reaction |
| MMTEPENTGCTP2    | MMcoas[n] + MMtepentcm[n] -> MMctn[n] + MMtepentcoas[n]                | 0     | 1000 | 12895.4 or 12894.1 or 78070.1 or 12895.2 or 12895.3 or 12895.1 | Mouse metabolic/transport demand<br>reaction |
| MMTEPENTGCRN1    | MMtepentcm[c] -> MMtepentcm[n]                                         | 0     | 1000 | 12896.1                                                        | Mouse metabolic/transport demand<br>reaction |
| MMTEPENT6        | MMctn[c] <=> MMtepent[c]                                               | 0     | 1000 | 57279.1                                                        | Mouse metabolic/transport demand<br>reaction |
| MMTHBPt4ACAMdASE | MMthbpt4acamdase[c] -> MMb2[c] + MMthbpt[c]                            | 0     | 1000 |                                                                | Mouse metabolic/transport demand<br>reaction |
| MMTHCHOLSTOCm    | MMthcholstocm[n] <=> MMthcholstoc[s]                                   | -1000 | 1000 | 13180.1 or 13180.2                                             | Mouse metabolic/transport demand<br>reaction |
| MMTHDm           | MMb[c] + MMadp[ng] + MMadn[n] <=> MMb[n] + MMadn[n] + MMadn[n]         | 0     | 0    |                                                                | Mouse metabolic/transport demand<br>reaction |
| MMTHF2           | MMoh[c] + MMthf[c] <=> MMoh[c] + MMthf[c]                              | 0     | 1000 | 18115.1 or 18115.2                                             | Mouse metabolic/transport demand<br>reaction |
| MMTHF#           | MMthf[c] <=> MMthf[n]                                                  | -1000 | 1000 | 20599.1 or 20599.2                                             | Mouse metabolic/transport demand<br>reaction |
| MMTHFm           | MMthf[c] <=> MMthf[n]                                                  | -1000 | 1000 |                                                                | Mouse metabolic/transport demand<br>reaction |
| MMTHMAtP6        | MMb2[c] + MMarp[c] + MMmnc[n] -> MMarp[c] + MMb[c] + MMb[c] + MMthf[c] | 0     | 1000 |                                                                | Mouse metabolic/transport demand<br>reaction |
| MMTHMD4          | MMna[n] + MMthym[n] -> MMna[n] + MMthym[n]                             | 0     | 1000 |                                                                | Mouse metabolic/transport demand<br>reaction |
| MMTHMD5          | 2 MMna[n] + MMthym[n] -> 2 MMna[n] + MMthym[n]                         | 0     | 1000 | 114304.1 or 434203.1 or 434203.2                               | Mouse metabolic/transport demand<br>reaction |
| MMTHMDMP4        | MMoh[c] + MMthump[c] <=> MMoh[c] + MMthump[c]                          | 0     | 1000 | 114304.1                                                       | Mouse metabolic/transport demand<br>reaction |
| MMTHMDMPm        | MMthump[c] + MMoh[n] -> MMoh[c] + MMthump[n]                           | 0     | 1000 | 20599.1 or 20599.2                                             | Mouse metabolic/transport demand<br>reaction |
| MMTHMP           | MMb2[c] + MMthump[c] -> MMb[c] + MMthf[c]                              | 0     | 1000 |                                                                | Mouse metabolic/transport demand<br>reaction |
| MMTHMPm          | MMthump[c] + 2 MMoh[n] -> 2 MMoh[c] + MMthump[n]                       | 0     | 1000 |                                                                | Mouse metabolic/transport demand<br>reaction |
| MMTHMP           | MMb2[c] + MMthump[c] -> MMb[c] + MMarp[c] + MMthump[c]                 | 0     | 1000 |                                                                | Mouse metabolic/transport demand<br>reaction |
| MMTHMPm          | 3 MMoh[c] + MMthump[c] -> 3 MMoh[c] + MMthump[c]                       | 0     | 1000 | 105663.1                                                       | Mouse metabolic/transport demand<br>reaction |
| MMTHM2m          | MMb[c] + MMthm[c] -> MMb[n] + MMthm[n]                                 | -1000 | 1000 | 20599.1 or 20599.2                                             | Mouse metabolic/transport demand<br>reaction |
| MMTHM3           | MMb[c] + MMthm[c] <=> MMb[c] + MMthm[n]                                | 0     | 1000 |                                                                | Mouse metabolic/transport demand<br>reaction |
| MMTHP2Cp         | MMthp2c[c] <=> MMthp2c[n]                                              | -1000 | 1000 | 116914.1 or 80721.1                                            | Mouse metabolic/transport demand<br>reaction |
| MMTHRALANaEx     | MMna[n] + MMals-L[c] + MMth-L[c] -> MMna[n] + MMals-L[c] + MMth-L[c]   | 0     | 1000 |                                                                | Mouse metabolic/transport demand<br>reaction |
| MMTHRASNaEx      | MMna[n] + MMals-L[c] + MMth-L[c] -> MMna[n] + MMals-L[c] + MMth-L[c]   | 0     | 1000 | 20514.1 or 55963.1                                             | Mouse metabolic/transport demand<br>reaction |
| MMTHRATB0c       | 2 MMna[n] + MMc-L[c] + MMth-L[c] -> 2 MMna[n] + MMc-L[c] + MMth-L[c]   | 0     | 1000 | 20514.1                                                        | Mouse metabolic/transport demand<br>reaction |
| MMTHR0AT1c       | MMna[n] + MMth-L[c] -> MMna[n] + MMth-L[c]                             | 0     | 1000 | 56774.1                                                        | Mouse metabolic/transport demand<br>reaction |
| MMTHRCYSNaEx     | MMna[n] + MMcys-L[c] + MMth-L[c] -> MMna[n] + MMcys-L[c] + MMth-L[c]   | 0     | 1000 | (70008.1 or 74338.1 and 57394.1)                               | Mouse metabolic/transport demand<br>reaction |
| MMTHREL          | MMth-L[c] -> MMth[n] + MMc2ob[c]                                       | 0     | 1000 | 20514.1 or 55963.1                                             | Mouse metabolic/transport demand<br>reaction |
| MMTHRELGNaEx     | MMna[n] + MMg-L[c] + MMth-L[c] -> MMna[n] + MMg-L[c] + MMth-L[c]       | 0     | 1000 | 231691.1                                                       | Mouse metabolic/transport demand<br>reaction |
| MMTHRELYesR      | MMg-L[c] + MMth-L[c] <=> MMg-L[c] + MMth-L[c]                          | -1000 | 1000 | 20514.1                                                        | Mouse metabolic/transport demand<br>reaction |
| MMTHRELYesR      | MMg[c] + MMth-L[c] <=> MMg[c] + MMth-L[c]                              | -1000 | 1000 | 53896.1 or 17254.1                                             | Mouse metabolic/transport demand<br>reaction |
| MMTHRELAT2c      | MMth-L[c] + MMth-L[c] -> MMth-L[c] + MMth-L[c]                         | 0     | 1000 | 53896.1 or 17254.1                                             | Mouse metabolic/transport demand<br>reaction |
| MMTHRPHELAT2c    | MMg-L[c] + MMth-L[c] -> MMg-L[c] + MMth-L[c]                           | 0     | 1000 | (20539.1 and 17254.1)                                          | Mouse metabolic/transport demand<br>reaction |
| MMTHRS           | MMb2[c] + MMphm[c] -> MMg[c] + MMth-L[c]                               | 0     | 1000 | (20539.1 and 17254.1)                                          | Mouse metabolic/transport demand<br>reaction |
| MMTHRSERNaEx     | MMna[n] + MMser-L[c] + MMth-L[c] -> MMna[n] + MMser-L[c] + MMth-L[c]   | 0     | 1000 | 208967.1                                                       | Mouse metabolic/transport demand<br>reaction |
| MMTHR4           | MMna[n] + MMth-L[c] -> MMna[n] + MMth-L[c]                             | 0     | 1000 | 20514.1 or 55963.1                                             | Mouse metabolic/transport demand<br>reaction |
| MMTHYMD1         | MMthym[n] -> MMthym[n]                                                 | 0     | 1000 | 105727.1 or 07760.1 or 56774.1                                 | Mouse metabolic/transport demand<br>reaction |
| MMTHYMD1         | MMthym[n] <=> MMthym[n]                                                | -1000 | 1000 | 13340.1 or 63959.1                                             | Mouse metabolic/transport demand<br>reaction |
| MMTHYMDm         | MMthym[n] <=> MMthym[n]                                                | -1000 | 1000 | 71279.1                                                        | Mouse metabolic/transport demand<br>reaction |
| MMTHYm           | MMthym[c] <=> MMthym[n]                                                | 0     | 1000 | 63959.1                                                        | Mouse metabolic/transport demand<br>reaction |
| MMTHYOX2         | MMthox-L[c] <=> MMthox-L[c]                                            | 0     | 1000 | 13340.1                                                        | Mouse metabolic/transport demand<br>reaction |
| MMTHYFK          | MMb2[c] + 2 MMb[c] + 2 MMc[c] -> 2 MMb2[c] + MMmdre[c]                 | 0     | 1000 | 20502.1                                                        | Mouse metabolic/transport demand<br>reaction |
| MMTKT1           | MMarp[c] + MMarp-D[c] -> MMarp[c] + MMarp[c]                           | -1000 | 1000 | 22018.1 or 22018.2 or 22018.3 or 22018.4 or 22018.5            | Mouse metabolic/transport demand<br>reaction |
| MMTKT2           | MMarp[c] + MMarp[c] -> MMarp[c] + MMarp[c]                             | -1000 | 1000 | 74419.1 or 11670.1 or 83553.1 or 21881.1                       | Mouse metabolic/transport demand<br>reaction |
| MMTMABADH        | MMb2[c] + MMadn[c] + MMadn[n] -> 2 MMb[c] + MMadn[c] + MMadn[n]        | 0     | 1000 | 74419.1 or 11670.1 or 83553.1                                  | Mouse metabolic/transport demand<br>reaction |
| MMTMK1           | MMarp[c] + MMthym[n] -> MMarp[c] + MMb[c] + MMarp[c]                   | 0     | 1000 | 56752.1                                                        | Mouse metabolic/transport demand<br>reaction |
| MMTMK1m          | MMarp[n] + MMthym[n] -> MMarp[n] + MMadn[n] + MMarp[n]                 | 0     | 1000 | 57813.1 or 619653.1                                            | Mouse metabolic/transport demand<br>reaction |
| MMTMKPK          | MMarp[c] + MMarp[c] -> MMarp[c] + MMarp[c] + MMthump[c]                | 0     | 1000 | 57813.1                                                        | Mouse metabolic/transport demand<br>reaction |
| MMTMMP           | MMarp[c] + MMthym[n] <=> MMarp[c] + MMthym[n]                          | -1000 | 1000 | 29807.1                                                        | Mouse metabolic/transport demand<br>reaction |
| MMTMMPK          | MMarp[c] + MMthump[c] -> MMarp[c] + MMthump[c]                         | 0     | 1000 | 72962.1                                                        | Mouse metabolic/transport demand<br>reaction |
| MMTMD5           | MMarp[c] + MMb2[c] -> MMb2[c] + MMarp[c]                               | 0     | 1000 |                                                                | Mouse metabolic/transport demand<br>reaction |
| MMTMLYSOX        | MMb2[c] + MMag[c] + MMmny[c] -> MMb2[c] + MMmny[c] + MMmny[n]          | 0     | 1000 | 22171.1                                                        | Mouse metabolic/transport demand<br>reaction |
| MMTMLYSts        | MMmny[c] -> MMmny[c]                                                   | 0     | 1000 | 192289.1                                                       | Mouse metabolic/transport demand<br>reaction |
| MMTMNDNCCOAs     | MMtmndnccois[c] <=> MMtmndnccois[s]                                    | -1000 | 1000 |                                                                | Mouse metabolic/transport demand<br>reaction |
| MMTMNDNCCPT1     | MMctn[c] + MMtmndnccois[c] -> MMcoas[c] + MMtmndnccm[c]                | 0     | 1000 |                                                                | Mouse metabolic/transport demand<br>reaction |
| MMTMNDNCCPT2     | MMcoas[n] + MMtmndnccm[n] -> MMctn[n] + MMtmndnccm[n]                  | 0     | 1000 | 12895.4 or 12894.1 or 78070.1 or 12895.2 or 12895.3 or 12895.1 | Mouse metabolic/transport demand<br>reaction |
| MMTMNDNCCRN1     | MMtmndnccm[c] -> MMtmndnccm[n]                                         | 0     | 1000 | 12896.1                                                        | Mouse metabolic/transport demand<br>reaction |
| MMTMNDNC1        | MMtmndncc[c] <=> MMtmndncc[c]                                          | 0     | 1000 | 57279.1                                                        | Mouse metabolic/transport demand<br>reaction |
| MMTOLBUTAMIDEc   | MMbutamide[c] <=> MMbutamide[n]                                        | 0     | 1000 |                                                                | Mouse metabolic/transport demand<br>reaction |
| MMTP             | MMdarp[c] <=> MMg3p[c]                                                 | -1000 | 1000 |                                                                | Mouse metabolic/transport demand<br>reaction |
| MMTRDR           | MMb[c] + MMdarp[c] + MMmdo[c] -> MMdarp[c] + MMmdo[c]                  | 0     | 1000 | 21991.1                                                        | Mouse metabolic/transport demand<br>reaction |
| MMTRDR2          | MMb[c] + MMdarp[c] + MMg10[c] -> MMdarp[c] + MMg10[c]                  | 0     | 1000 | 50493.1 or 50493.2 or 50493.3 or 50493.4                       | Mouse metabolic/transport demand<br>reaction |
| MMTRDR3          | MMb[c] + MMdarp[c] + MMg10[c] -> MMdarp[c] + MMg10[c]                  | 0     | 1000 | 50493.1 or 50493.2 or 50493.3 or 50493.4                       | Mouse metabolic/transport demand<br>reaction |
| MMTRDRm          | MMb[n] + MMdarp[n] + MMmdo[n] -> MMdarp[n] + MMmdo[n]                  | 0     | 1000 | 50493.1 or 50493.2 or 50493.3 or 50493.4                       | Mouse metabolic/transport demand<br>reaction |
| MMTRH            | MMb2[c] + MMb[c] -> 2 MMg-D[c]                                         | 0     | 1000 | 26462.1 or 21222.1 or 26462.2 or 26462.3                       | Mouse metabolic/transport demand<br>reaction |
| MMTRHc           | MMb2[c] + MMb[c] -> 2 MMg-D[c]                                         | 0     | 1000 | 212974.1                                                       | Mouse metabolic/transport demand<br>reaction |
| MMTRIDITHYSLF    | MMridithyof[c] -> MMridithyof[n]                                       | 0     | 1000 | 58866.1                                                        | Mouse metabolic/transport demand<br>reaction |
| MMTRIDITHYSLT    | MMarp[c] + MMridithy[c] -> MMb[c] + MMarp[c] + MMridithyof[c]          | 0     | 1000 |                                                                | Mouse metabolic/transport demand<br>reaction |
| MMTRIDITHY2      | MMridithy[c] <=> MMridithy[c]                                          | 0     | 1000 | 20887.1 or 20887.2 or 20887.3 or 20887.4 or 20887.5            | Mouse metabolic/transport demand<br>reaction |
| MMTRIOK          | MMarp[c] + MMgub[c] -> MMarp[c] + MMb[c] + MMg3p[c]                    | 0     | 1000 | 20502.1                                                        | Mouse metabolic/transport demand<br>reaction |
| MMTRPATB0c       | 2 MMna[n] + MMc-L[c] + MMth-L[c] -> 2 MMna[n] + MMc-L[c] + MMth-L[c]   | 0     | 1000 |                                                                | Mouse metabolic/transport demand<br>reaction |
| MMTRP0AT1c       | MMna[n] + MMarp-L[c] -> MMna[n] + MMarp-L[c]                           | 0     | 1000 | 56774.1                                                        | Mouse metabolic/transport demand<br>reaction |
| MMTRPHYDR02      | MMb2[c] + MMarp[c] + MMth-L[c] -> MMarp[c] + MMth-L[c] + MMth-L[c]     | 0     | 1000 | (70008.1 or 74338.1 and 57394.1)                               | Mouse metabolic/transport demand<br>reaction |
| MMTRPHELAT2c     | MMth-L[c] + MMarp-L[c] -> MMth-L[c] + MMarp-L[c]                       | 0     | 1000 | 21990.1 or 216343.1                                            | Mouse metabolic/transport demand<br>reaction |
| MMTRPLAT1c       | MMth-L[c] + MMarp-L[c] -> MMth-L[c] + MMarp-L[c]                       | 0     | 1000 | (20539.1 and 17254.1)                                          | Mouse metabolic/transport demand<br>reaction |
| MMTRP02          | MMb2[c] + MMarp-L[c] -> MMb-L[c] + MMarp-L[c]                          | 0     | 1000 | (20539.1 and 17254.1)                                          | Mouse metabolic/transport demand<br>reaction |
| MMTRPHELAT1c     | MMth-L[c] + MMarp-L[c] -> MMth-L[c] + MMarp-L[c]                       | 0     | 1000 | 56720.1                                                        | Mouse metabolic/transport demand<br>reaction |
| MMTRP4           | MMna[n] + MMarp-L[c] -> MMna[n] + MMarp-L[c]                           | 0     | 1000 | (20539.1 and 17254.1)                                          | Mouse metabolic/transport demand<br>reaction |
| MMTRYPTAOX       | MMb2[c] + MMb2[c] + MMtrypt[c] -> MMb2[c] + MMb2[c] + MMb2[c]          | 0     | 1000 | 56774.1                                                        | Mouse metabolic/transport demand<br>reaction |

|                   |                                                                                            |       |      |                                                                |                                              |
|-------------------|--------------------------------------------------------------------------------------------|-------|------|----------------------------------------------------------------|----------------------------------------------|
| MMTS3             | $MMp[3]c \rightleftharpoons MMb[3]c$                                                       | -1000 | 1000 | 189731.1 or 237940.1 or 17161.1 or 237940.2 or 76507.1         | Mouse metabolic/transport demand<br>reaction |
| MMTSTESTERONEGLCu | $MMb[2]c + MMarp[c] + MMstestosterone[c] \rightarrow MMb[c] + MMb[c] + MMstestosterone[c]$ | 0     | 1000 |                                                                | Mouse metabolic/transport demand<br>reaction |
| MMTSTESTERONEGLCu | $MMstestosterone[c] \rightleftharpoons MMstestosterone[r]$                                 | -1000 | 1000 | 17250.1                                                        | Mouse metabolic/transport demand<br>reaction |
| MMTSTESTERONEGLCu | $MMb[2]c + MMstestosterone[c] \rightarrow MMb[c] + MMb[c] + MMstestosterone[c]$            | 0     | 1000 |                                                                | Mouse metabolic/transport demand<br>reaction |
| MMTSTESTERONESe   | $MMstestosterone[c] \rightleftharpoons MMstestosterone[r]$                                 | -1000 | 0    | 20859.1                                                        | Mouse metabolic/transport demand<br>reaction |
| MMTSTESTERONu     | $MMstestosterone[c] \rightleftharpoons MMstestosterone[r]$                                 | 0     | 1000 |                                                                | Mouse metabolic/transport demand<br>reaction |
| MMTSTESTERONu     | $MMstestosterone[c] \rightleftharpoons MMstestosterone[r]$                                 | -1000 | 1000 |                                                                | Mouse metabolic/transport demand<br>reaction |
| MMTSUL4_3         | $3 MMa[1]c + MMb[1]c \rightleftharpoons 3 MMa[1]c + MMb[1]c$                               | 0     | 1000 |                                                                | Mouse metabolic/transport demand<br>reaction |
| MMTTDC4u          | $MMb[1]c \rightarrow MMb[1]c$                                                              | 0     | 1000 | 55961.1                                                        | Mouse metabolic/transport demand<br>reaction |
| MMTTDC4u          | $MMb[1]c \rightleftharpoons MMb[1]c$                                                       | 0     | 1000 |                                                                | Mouse metabolic/transport demand<br>reaction |
| MMTTDCPT1         | $MMb[1]c + MMb[1]c \rightarrow MMb[1]c + MMb[1]c$                                          | 0     | 1000 |                                                                | Mouse metabolic/transport demand<br>reaction |
| MMTTDCPT2         | $MMb[1]c + MMb[1]c \rightarrow MMb[1]c + MMb[1]c$                                          | 0     | 1000 | 12895.4 or 12894.1 or 78070.1 or 12895.2 or 12895.3 or 12895.1 | Mouse metabolic/transport demand<br>reaction |
| MMTTDCRN          | $MMb[1]c \rightarrow MMb[1]c$                                                              | 0     | 1000 | 12896.1                                                        | Mouse metabolic/transport demand<br>reaction |
| MMTXA2e           | $MMb[2]c \rightleftharpoons MMb[2]c$                                                       | 0     | 1000 | 57279.1                                                        | Mouse metabolic/transport demand<br>reaction |
| MMTXA2u           | $MMb[2]c \rightleftharpoons MMb[2]c$                                                       | -1000 | 1000 |                                                                | Mouse metabolic/transport demand<br>reaction |
| MMTXA5u           | $MMb[1]c \rightarrow MMb[1]c$                                                              | 0     | 1000 |                                                                | Mouse metabolic/transport demand<br>reaction |
| MMTYMSF1          | $MMb[1]c \rightarrow MMb[1]c$                                                              | 0     | 1000 | 21391.1                                                        | Mouse metabolic/transport demand<br>reaction |
| MMTYR3M02         | $MMb[2]c + MMb[1]c + MMb[1]c \rightarrow MMb[2]c + MMb[1]c + MMb[1]c$                      | 0     | 1000 |                                                                | Mouse metabolic/transport demand<br>reaction |
| MMTYRASE          | $MMb[1]c + MMb[1]c \rightarrow MMb[1]c + MMb[1]c$                                          | 0     | 1000 | 21823.1 or 21823.2 or 21823.3                                  | Mouse metabolic/transport demand<br>reaction |
| MMTYRATB0u        | $2 MMa[1]c + MMb[1]c + MMb[1]c \rightarrow 2 MMa[1]c + MMb[1]c + MMb[1]c$                  | 0     | 1000 | 22178.1                                                        | Mouse metabolic/transport demand<br>reaction |
| MMTYREBATT1u      | $MMa[1]c + MMb[1]c \rightarrow MMa[1]c + MMb[1]c$                                          | 0     | 1000 | 56774.1                                                        | Mouse metabolic/transport demand<br>reaction |
| MMTYRCHOX         | $MMb[1]c + MMb[1]c \rightarrow MMb[1]c + MMb[1]c$                                          | 0     | 1000 | (79008.1 or 74338.1 and 57394.1)                               | Mouse metabolic/transport demand<br>reaction |
| MMTYRDOFO         | $MMb[2]c + 2 MMb[1]c \rightarrow 2 MMb[2]c + MMb[1]c$                                      | 0     | 1000 | 13195.1                                                        | Mouse metabolic/transport demand<br>reaction |
| MMTYRDOFO1        | $MMb[2]c + 2 MMb[2]c \rightarrow 2 MMb[2]c + 2 MMb[2]c$                                    | 0     | 1000 | 22173.1                                                        | Mouse metabolic/transport demand<br>reaction |
| MMTYRLELAT2u      | $MMb[1]c + MMb[1]c \rightarrow MMb[1]c + MMb[1]c$                                          | 0     | 1000 | 22173.1                                                        | Mouse metabolic/transport demand<br>reaction |
| MMTYRLAT1u        | $MMb[1]c + MMb[1]c \rightarrow MMb[1]c + MMb[1]c$                                          | 0     | 1000 | (20539.1 and 17254.1)                                          | Mouse metabolic/transport demand<br>reaction |
| MMTYRROXD4u       | $MMb[2]c + MMb[2]c + MMb[1]c \rightarrow MMb[2]c + MMb[2]c + MMb[1]c$                      | 0     | 1000 | (20539.1 and 17254.1)                                          | Mouse metabolic/transport demand<br>reaction |
| MMTYRPIELAT2u     | $MMb[1]c + MMb[1]c \rightarrow MMb[1]c + MMb[1]c$                                          | 0     | 1000 | 189731.1 or 17161.1                                            | Mouse metabolic/transport demand<br>reaction |
| MMTYRTA           | $MMb[1]c + MMb[1]c \rightleftharpoons MMb[1]c + MMb[1]c$                                   | -1000 | 1000 | (20539.1 and 17254.1)                                          | Mouse metabolic/transport demand<br>reaction |
| MMTYRTAm          | $MMb[1]c + MMb[1]c \rightleftharpoons MMb[1]c + MMb[1]c$                                   | -1000 | 1000 | 14718.1                                                        | Mouse metabolic/transport demand<br>reaction |
| MMTYR84           | $MMb[1]c + MMb[1]c \rightarrow MMb[1]c + MMb[1]c$                                          | 0     | 1000 | 234724.1 or 14719.1                                            | Mouse metabolic/transport demand<br>reaction |
| MMUAG2EM4u        | $MMb[2]c + MMb[1]c \rightarrow MMb[2]c + MMb[1]c$                                          | 0     | 1000 | 56774.1                                                        | Mouse metabolic/transport demand<br>reaction |
| MMUAG4E           | $MMb[1]c + MMb[1]c \rightarrow MMb[1]c + MMb[1]c$                                          | -1000 | 1000 | 50798.1                                                        | Mouse metabolic/transport demand<br>reaction |
| MMUAGALDP         | $MMb[1]c + MMb[1]c + MMb[1]c \rightarrow MMb[1]c + MMb[1]c + MMb[1]c$                      | 0     | 1000 | 74246.1 or 74246.2                                             | Mouse metabolic/transport demand<br>reaction |
| MMUAGDP           | $MMb[1]c + MMb[1]c + MMb[1]c \rightarrow MMb[1]c + MMb[1]c + MMb[1]c$                      | 0     | 1000 |                                                                | Mouse metabolic/transport demand<br>reaction |
| MMUDPACGALu       | $MMb[1]c + MMb[1]c \rightleftharpoons MMb[1]c + MMb[1]c$                                   | -1000 | 1000 | 227620.1 or 107652.1                                           | Mouse metabolic/transport demand<br>reaction |
| MMUDPDOLPT_L      | $0.1 MMb[1]c + MMb[1]c \rightarrow MMb[1]c + 0.1 MMb[1]c$                                  | 0     | 1000 |                                                                | Mouse metabolic/transport demand<br>reaction |
| MMUDPDOLPT_U      | $0.1 MMb[1]c + MMb[1]c \rightarrow MMb[1]c + 0.1 MMb[1]c$                                  | 0     | 1000 | 66248.1                                                        | Mouse metabolic/transport demand<br>reaction |
| MMUDPG1P          | $MMb[2]c + MMb[1]c \rightarrow 2 MMb[2]c + MMb[1]c$                                        | 0     | 1000 | 66248.1                                                        | Mouse metabolic/transport demand<br>reaction |
| MMUDPG4E          | $MMb[1]c \rightleftharpoons MMb[1]c$                                                       | -1000 | 1000 |                                                                | Mouse metabolic/transport demand<br>reaction |
| MMUDPGAL2g        | $MMb[1]c \rightarrow MMb[1]c$                                                              | 0     | 1000 | 74246.1 or 74246.2                                             | Mouse metabolic/transport demand<br>reaction |
| MMUDPGALg         | $MMb[1]c + MMb[1]c \rightleftharpoons MMb[1]c + MMb[1]c$                                   | -1000 | 1000 |                                                                | Mouse metabolic/transport demand<br>reaction |
| MMUDPGD           | $MMb[2]c + 2 MMb[1]c + MMb[1]c \rightarrow 3 MMb[2]c + 2 MMb[1]c + MMb[1]c$                | 0     | 1000 | 22232.1                                                        | Mouse metabolic/transport demand<br>reaction |
| MMUDPGLC_Ater     | $MMb[1]c + MMb[1]c \rightarrow MMb[1]c + MMb[1]c$                                          | -1000 | 1000 | 22235.1                                                        | Mouse metabolic/transport demand<br>reaction |
| MMUDPGLCAg        | $MMb[1]c + MMb[1]c \rightleftharpoons MMb[1]c + MMb[1]c$                                   | -1000 | 1000 | 242585.1                                                       | Mouse metabolic/transport demand<br>reaction |
| MMUDPGLCter       | $MMb[1]c + MMb[1]c \rightleftharpoons MMb[1]c + MMb[1]c$                                   | -1000 | 1000 |                                                                | Mouse metabolic/transport demand<br>reaction |
| MMUDPGLCG         | $MMb[1]c + MMb[1]c \rightleftharpoons MMb[1]c + MMb[1]c$                                   | -1000 | 1000 |                                                                | Mouse metabolic/transport demand<br>reaction |
| MMUDPGLDXg        | $MMb[1]c + MMb[1]c \rightarrow MMb[1]c + MMb[1]c$                                          | 0     | 1000 | 58246.1 or 229782.1 or 70484.1                                 | Mouse metabolic/transport demand<br>reaction |
| MMUDPGNP          | $MMb[2]c + MMb[1]c \rightarrow MMb[2]c + MMb[1]c$                                          | 0     | 1000 | 67883.1                                                        | Mouse metabolic/transport demand<br>reaction |
| MMUDPGP           | $MMb[2]c + MMb[1]c \rightarrow 2 MMb[2]c + MMb[1]c$                                        | 0     | 1000 |                                                                | Mouse metabolic/transport demand<br>reaction |
| MMUDPCYLae        | $MMb[1]c + MMb[1]c \rightleftharpoons MMb[1]c + MMb[1]c$                                   | -1000 | 1000 | 18605.1 or 18606.1 or 209558.1                                 | Mouse metabolic/transport demand<br>reaction |
| MMUDPCYUg         | $MMb[1]c + MMb[1]c \rightleftharpoons MMb[1]c + MMb[1]c$                                   | -1000 | 1000 |                                                                | Mouse metabolic/transport demand<br>reaction |
| MMUDP9u           | $MMb[1]c \rightleftharpoons MMb[1]c$                                                       | -1000 | 1000 | 58246.1                                                        | Mouse metabolic/transport demand<br>reaction |
| MMUGALGTg         | $MMb[1]c + MMb[1]c \rightarrow MMb[1]c + MMb[1]c$                                          | 0     | 1000 |                                                                | Mouse metabolic/transport demand<br>reaction |
| MMUGALNACter      | $MMb[1]c + MMb[1]c \rightleftharpoons MMb[1]c + MMb[1]c$                                   | -1000 | 1000 | 16770.1 or 14595.1 or 53418.1 or 53418.2                       | Mouse metabolic/transport demand<br>reaction |
| MMUGALNACg        | $MMb[1]c + MMb[1]c \rightleftharpoons MMb[1]c + MMb[1]c$                                   | -1000 | 1000 | 242585.1                                                       | Mouse metabolic/transport demand<br>reaction |
| MMUGCG            | $MMb[1]c + MMb[1]c \rightarrow MMb[1]c + MMb[1]c$                                          | 0     | 1000 | 22232.1                                                        | Mouse metabolic/transport demand<br>reaction |
| MMUGLCNACg        | $MMb[1]c + MMb[1]c \rightleftharpoons MMb[1]c + MMb[1]c$                                   | -1000 | 1000 | 22234.1                                                        | Mouse metabolic/transport demand<br>reaction |
| MMUGLT            | $MMb[1]c + MMb[1]c \rightleftharpoons MMb[1]c + MMb[1]c$                                   | -1000 | 1000 | 70484.1                                                        | Mouse metabolic/transport demand<br>reaction |
| MMUGT1A0u         | $MMb[1]c + MMb[1]c \rightarrow MMb[1]c + MMb[1]c$                                          | 0     | 1000 | 14430.1 or 14430.2 or 14430.3                                  | Mouse metabolic/transport demand<br>reaction |
| MMUMPK            | $MMb[1]c + MMb[1]c \rightleftharpoons MMb[1]c + MMb[1]c$                                   | -1000 | 1000 |                                                                | Mouse metabolic/transport demand<br>reaction |
| MMUMPK2           | $MMb[1]c + MMb[1]c \rightleftharpoons MMb[1]c + MMb[1]c$                                   | -1000 | 1000 | 66588.1                                                        | Mouse metabolic/transport demand<br>reaction |
| MMUMPK2u          | $MMb[1]c + MMb[1]c \rightleftharpoons MMb[1]c + MMb[1]c$                                   | -1000 | 1000 | 66588.1                                                        | Mouse metabolic/transport demand<br>reaction |
| MMUMPK3           | $MMb[1]c + MMb[1]c \rightleftharpoons 2 MMb[1]c$                                           | -1000 | 1000 | 66588.1                                                        | Mouse metabolic/transport demand<br>reaction |
| MMUMPK3u          | $MMb[1]c + MMb[1]c \rightleftharpoons 2 MMb[1]c$                                           | -1000 | 1000 | 66588.1                                                        | Mouse metabolic/transport demand<br>reaction |
| MMUMPK4           | $MMb[1]c + MMb[1]c \rightleftharpoons MMb[1]c + MMb[1]c$                                   | -1000 | 1000 | 66588.1                                                        | Mouse metabolic/transport demand<br>reaction |
| MMUMPK4u          | $MMb[1]c + MMb[1]c \rightleftharpoons MMb[1]c + MMb[1]c$                                   | -1000 | 1000 | 66588.1                                                        | Mouse metabolic/transport demand<br>reaction |
| MMUMPK5           | $MMb[1]c + MMb[1]c \rightleftharpoons MMb[1]c + MMb[1]c$                                   | -1000 | 1000 | 66588.1                                                        | Mouse metabolic/transport demand<br>reaction |
| MMUMPK5u          | $MMb[1]c + MMb[1]c \rightleftharpoons MMb[1]c + MMb[1]c$                                   | -1000 | 1000 | 66588.1                                                        | Mouse metabolic/transport demand<br>reaction |
| MMUMPK6           | $MMb[1]c + MMb[1]c \rightleftharpoons MMb[1]c + MMb[1]c$                                   | -1000 | 1000 | 66588.1                                                        | Mouse metabolic/transport demand<br>reaction |
| MMUMPK6u          | $MMb[1]c + MMb[1]c \rightleftharpoons MMb[1]c + MMb[1]c$                                   | -1000 | 1000 | 66588.1                                                        | Mouse metabolic/transport demand<br>reaction |
| MMUMPK7           | $MMb[1]c + MMb[1]c \rightleftharpoons MMb[1]c + MMb[1]c$                                   | -1000 | 1000 | 66588.1                                                        | Mouse metabolic/transport demand<br>reaction |
| MMUMPK7u          | $MMb[1]c + MMb[1]c \rightleftharpoons MMb[1]c + MMb[1]c$                                   | -1000 | 1000 | 66588.1                                                        | Mouse metabolic/transport demand<br>reaction |
| MMUMPKm           | $MMb[1]c + MMb[1]c \rightleftharpoons MMb[1]c + MMb[1]c$                                   | -1000 | 1000 | 66588.1                                                        | Mouse metabolic/transport demand<br>reaction |
| MMUMPKa           | $MMb[1]c + MMb[1]c \rightleftharpoons MMb[1]c + MMb[1]c$                                   | -1000 | 1000 |                                                                | Mouse metabolic/transport demand<br>reaction |
| MMUMPV            | $MMb[1]c \rightleftharpoons MMb[1]c$                                                       | -1000 | 1000 | 66588.1                                                        | Mouse metabolic/transport demand<br>reaction |
| MMUNK2            | $MMb[1]c + MMb[1]c \rightarrow MMb[1]c + MMb[1]c$                                          | 0     | 1000 |                                                                | Mouse metabolic/transport demand<br>reaction |
| MMUNK3            | $MMb[1]c + MMb[1]c \rightarrow MMb[1]c + MMb[1]c$                                          | 0     | 1000 |                                                                | Mouse metabolic/transport demand<br>reaction |
| MMUPP3S           | $MMb[1]c \rightarrow MMb[1]c + MMb[1]c$                                                    | 0     | 1000 |                                                                | Mouse metabolic/transport demand<br>reaction |
| MMUPPD01          | $4 MMb[1]c + MMb[1]c \rightarrow 4 MMb[1]c + MMb[1]c$                                      | 0     | 1000 | 22276.1                                                        | Mouse metabolic/transport demand<br>reaction |
| MMUPPN            | $MMb[2]c + 2 MMb[1]c + MMb[1]c \rightarrow MMb[2]c + MMb[1]c + MMb[1]c$                    | 0     | 1000 | 22275.1                                                        | Mouse metabolic/transport demand<br>reaction |
| MMURATb           | $MMb[1]c \rightarrow MMb[1]c$                                                              | 0     | 1000 | 103149.1                                                       | Mouse metabolic/transport demand<br>reaction |
| MMURATb1          | $MMb[1]c \rightarrow MMb[1]c$                                                              | 0     | 1000 |                                                                | Mouse metabolic/transport demand<br>reaction |
| MMURAt            | $MMb[1]c \rightleftharpoons MMb[1]c$                                                       | 0     | 1000 |                                                                | Mouse metabolic/transport demand<br>reaction |
| MMURCN            | $MMb[2]c + MMb[1]c \rightarrow MMb[2]c$                                                    | 0     | 1000 | 13340.1                                                        | Mouse metabolic/transport demand<br>reaction |

|                 |                                                                                           |       |      |                                                                |                                              |
|-----------------|-------------------------------------------------------------------------------------------|-------|------|----------------------------------------------------------------|----------------------------------------------|
| MMURE4u         | MMurea[e] <=> MMurea[c]                                                                   | 0     | 1000 | 243537.1                                                       | Mouse metabolic/transport demand<br>reaction |
| MMURE4s         | MMb2a[e] + MMurea[e] <=> MMb2a[c] + MMurea[c]                                             | 0     | 1000 | 108052.1 or 27411.1 or 20537.1 or 114479.1                     | Mouse metabolic/transport demand<br>reaction |
| MMURE4m         | MMurea[c] <=> MMurea[m]                                                                   | -1000 | 1000 | 20537.1                                                        | Mouse metabolic/transport demand<br>reaction |
| MMURED2m        | MMup[m] + MMamp[m] <=> MMup[e] + MMadp[m]                                                 | -1000 | 1000 | 64008.1                                                        | Mouse metabolic/transport demand<br>reaction |
| MMURK1          | MMup[c] + MMur[c] -> MMup[c] + MMur[c] + MMup[c]                                          | 0     | 1000 |                                                                | Mouse metabolic/transport demand<br>reaction |
| MMURR           | MMur[e] <=> MMur[c]                                                                       | 0     | 1000 | 22245.1 or 80914.1                                             | Mouse metabolic/transport demand<br>reaction |
| MMURh4          | MMur1[e] + MMur[e] -> MMur1[c] + MMur[c]                                                  | 0     | 1000 | 13340.1 or 63059.1                                             | Mouse metabolic/transport demand<br>reaction |
| MMURh5          | 2 MMur1[e] + MMur[e] -> 2 MMur1[c] + MMur[c]                                              | 0     | 1000 | 114304.1 or 434203.1 or 434203.2 or 209346.1                   | Mouse metabolic/transport demand<br>reaction |
| MMUROLACr       | MDh[r] + MDgcur[r] <=> MDh2a[r] + MDghe[r]                                                | -1000 | 1000 | 114304.1                                                       | Mouse metabolic/transport demand<br>reaction |
| MMUTPa          | MMup[c] <=> MMup[m]                                                                       | -1000 | 1000 |                                                                | Mouse metabolic/transport demand<br>reaction |
| MMUrd           | MMur[f] <=> MMur[c]                                                                       | -1000 | 1000 |                                                                | Mouse metabolic/transport demand<br>reaction |
| MMUrim          | MMur[c] <=> MMur[m]                                                                       | -1000 | 1000 | 71279.1                                                        | Mouse metabolic/transport demand<br>reaction |
| MMUrim          | MMur[c] <=> MMur[m]                                                                       | -1000 | 1000 | 63949.1                                                        | Mouse metabolic/transport demand<br>reaction |
| MMVACCCP1       | MMcra[c] + MMvaccoc[c] -> MMcra[c] + MMvaccoc[c]                                          | 0     | 1000 |                                                                | Mouse metabolic/transport demand<br>reaction |
| MMVACCCP2       | MMcra[m] + MMvaccoc[m] -> MMcra[m] + MMvaccoc[m]                                          | 0     | 1000 | 12895.4 or 12894.1 or 78070.1 or 12895.2 or 12895.3 or 12895.1 | Mouse metabolic/transport demand<br>reaction |
| MMVACCCRN1      | MMvaccoc[c] -> MMvaccoc[m]                                                                | 0     | 1000 | 12896.1                                                        | Mouse metabolic/transport demand<br>reaction |
| MMVACC1         | MMvacc[c] <=> MMvacc[c]                                                                   | 0     | 1000 | 57279.1                                                        | Mouse metabolic/transport demand<br>reaction |
| MMVALATB0c      | 2 MMur1[m] + MMc[e] + MMval-L1a[e] -> 2 MMur1[c] + MMc[c] + MMval-L1c[e]                  | 0     | 1000 |                                                                | Mouse metabolic/transport demand<br>reaction |
| MMVALBOA7c      | MMur1[m] + MMval-L1a[e] -> MMur1[c] + MMval-L1c[e]                                        | 0     | 1000 | 56774.1                                                        | Mouse metabolic/transport demand<br>reaction |
| MMVALLELAT2c    | MMb-L1c[e] + MMval-L1e[e] -> MMb-L1e[e] + MMval-L1c[e]                                    | 0     | 1000 | (70008.1 or 74338.1 and 57394.1)                               | Mouse metabolic/transport demand<br>reaction |
| MMVALLAT1c      | MMb-L1c[e] + MMval-L1a[e] -> MMb-L1a[e] + MMval-L1c[e]                                    | 0     | 1000 | (20539.1 and 17254.1)                                          | Mouse metabolic/transport demand<br>reaction |
| MMVALPHLEAT2c   | MMb-L1c[e] + MMval-L1e[e] -> MMb-L1e[e] + MMval-L1c[e]                                    | 0     | 1000 | (20539.1 and 17254.1)                                          | Mouse metabolic/transport demand<br>reaction |
| MMVALTA         | MDag[c] + MDval-L1c[e] <=> MDag-L1c[e] + MMb1m[c]                                         | -1000 | 1000 | (20539.1 and 17254.1)                                          | Mouse metabolic/transport demand<br>reaction |
| MMVALT4m        | MDag[m] + MDval-L1m[e] <=> MDag-L1m[e] + MMb1m[m]                                         | -1000 | 1000 | 12035.1                                                        | Mouse metabolic/transport demand<br>reaction |
| MMVAL4s         | MMur1[c] + MMval-L1e[e] -> MMur1[c] + MMval-L1c[e]                                        | 0     | 1000 | 12036.1                                                        | Mouse metabolic/transport demand<br>reaction |
| MMVAL5m         | MMval-L1c[e] <=> MMval-L1m[e]                                                             | -1000 | 1000 | 56774.1                                                        | Mouse metabolic/transport demand<br>reaction |
| MMVALav         | MMval-L1e[e] <=> MMval-L1c[e]                                                             | 0     | 1000 |                                                                | Mouse metabolic/transport demand<br>reaction |
| MMVD3           | MMad3[c] <=> MMvad3[c]                                                                    | -1000 | 1000 | 215113.1 or 72401.1                                            | Mouse metabolic/transport demand<br>reaction |
| MMVITD3Hu       | MMb[m] + MMvadp[m] + MMc2[m] + MMvad2[m] -> MMb2[m] + MMvadp[m] + MM2bva2[m]              | 0     | 1000 |                                                                | Mouse metabolic/transport demand<br>reaction |
| MMVITD2u        | MMvad2[c] -> MMvad2[e]                                                                    | 0     | 1000 | 104086.1                                                       | Mouse metabolic/transport demand<br>reaction |
| MMVITD2m        | MMvad2[m] <=> MMvad2[c]                                                                   | -1000 | 1000 |                                                                | Mouse metabolic/transport demand<br>reaction |
| MMVITD3He       | MMb[m] + MMvadp[m] + MMc2[m] + MMvad3[m] -> MMb2[m] + MMvadp[m] + MM2bva3[m]              | 0     | 1000 |                                                                | Mouse metabolic/transport demand<br>reaction |
| MMVITD3Te       | MMvad3[c] <=> MMvad3[e]                                                                   | -1000 | 1000 | 104086.1                                                       | Mouse metabolic/transport demand<br>reaction |
| MMVITD3u        | MMvad3[m] <=> MMvad3[c]                                                                   | -1000 | 1000 |                                                                | Mouse metabolic/transport demand<br>reaction |
| MMVITD3r        | MMvad3[c] -> MMvad3[e]                                                                    | 0     | 1000 |                                                                | Mouse metabolic/transport demand<br>reaction |
| MMVITD3e        | MMvad3[e] -> MMvad3[c]                                                                    | 0     | 1000 |                                                                | Mouse metabolic/transport demand<br>reaction |
| MMVITD3m        | MMvad3[m] -> MMvad3[c]                                                                    | 0     | 1000 |                                                                | Mouse metabolic/transport demand<br>reaction |
| MMVITD3ms       | MMvad3[c] -> MMvad3[m]                                                                    | 0     | 1000 |                                                                | Mouse metabolic/transport demand<br>reaction |
| MMVITBc         | MMvate1[m] -> MMvate1[c]                                                                  | 0     | 1000 |                                                                | Mouse metabolic/transport demand<br>reaction |
| MMVITB1         | MMb2a[c] + MMup[c] + MMvate1[c] -> MMup[c] + MMb[c] + MMval-L1 + MMur1[m]                 | 0     | 1000 | (20778.1 and 237636.1)                                         | Mouse metabolic/transport demand<br>reaction |
| MMVITKd         | MMbhe-Q[e] -> MMbhe-Q[e]                                                                  | 0     | 1000 | 11303.1                                                        | Mouse metabolic/transport demand<br>reaction |
| MMVICS2p        | MMcra[m] + MMup[m] + MMbhecholester[m] -> MMbhecholester[m] + MMup[m] + MMbhecholester[m] | 0     | 1000 |                                                                | Mouse metabolic/transport demand<br>reaction |
| MMVLC5u         | MMup[m] + MMcra[m] + MMbhecholester[m] -> MMbhecholester[m] + MMup[m] + MMbhecholester[m] | 0     | 1000 | 26458.1                                                        | Mouse metabolic/transport demand<br>reaction |
| MMVLC3p         | MMcra[m] + MMup[m] + MMbhecholester[m] -> MMbhecholester[m] + MMup[m] + MMbhecholester[m] | 0     | 1000 | 26458.1                                                        | Mouse metabolic/transport demand<br>reaction |
| MMVLC3r         | MMup[m] + MMcra[m] + MMbhecholester[m] -> MMbhecholester[m] + MMup[m] + MMbhecholester[m] | 0     | 1000 | 26458.1                                                        | Mouse metabolic/transport demand<br>reaction |
| MMWHDDCAc       | MMvhdca[e] <=> MMvhdca[c]                                                                 | 0     | 1000 | 26458.1                                                        | Mouse metabolic/transport demand<br>reaction |
| MMWHDDCAc       | MMvhdca[e] <=> MMvhdca[c]                                                                 | 0     | 1000 |                                                                | Mouse metabolic/transport demand<br>reaction |
| MMWHSTYSTERONEb | MMvststerone[c] <=> MMvststerone[e]                                                       | -1000 | 0    |                                                                | Mouse metabolic/transport demand<br>reaction |
| MMWHTDCAc       | MMvhdca[e] <=> MMvhdca[c]                                                                 | 0     | 1000 |                                                                | Mouse metabolic/transport demand<br>reaction |
| MMXAN2p         | MMvad3[c] + MMb2a[c] + MMur[m] -> MMb[c] + MMvad3[c] + MMur[m]                            | 0     | 1000 |                                                                | Mouse metabolic/transport demand<br>reaction |
| MMXANrx         | MMur[m] -> MMur[m]                                                                        | 0     | 1000 | 22436.1                                                        | Mouse metabolic/transport demand<br>reaction |
| MMXAO2s         | MMb2a[c] + MMb2a[c] + MMur[m] -> MMb2a[c] + MMur[m]                                       | 0     | 1000 |                                                                | Mouse metabolic/transport demand<br>reaction |
| MMXAO3s         | MMb2a[c] + MMb2a[c] + MMur[m] -> MMb2a[c] + MMur[m]                                       | 0     | 1000 | 22436.1                                                        | Mouse metabolic/transport demand<br>reaction |
| MMXOL27OHm      | MMur27a[e] <=> MMur27a[m]                                                                 | -1000 | 1000 | 22436.1                                                        | Mouse metabolic/transport demand<br>reaction |
| MMXOL7AH2m      | MMur7a[e] <=> MMur7a2[m]                                                                  | -1000 | 1000 |                                                                | Mouse metabolic/transport demand<br>reaction |
| MMXOL7AH2r      | MMur7a2[e] <=> MMur7a2[r]                                                                 | -1000 | 1000 |                                                                | Mouse metabolic/transport demand<br>reaction |
| MMXOL7AON2r     | MMur7a2m[e] <=> MMur7a2m[r]                                                               | -1000 | 1000 |                                                                | Mouse metabolic/transport demand<br>reaction |
| MMXOLDIOLONEb   | MMvaldiolone[c] <=> MMvaldiolone[e]                                                       | -1000 | 1000 |                                                                | Mouse metabolic/transport demand<br>reaction |
| MMXOLDIOLONm    | MMvaldiolone[m] <=> MMvaldiolone[r]                                                       | -1000 | 1000 |                                                                | Mouse metabolic/transport demand<br>reaction |
| MMXOLST2HSTb    | MMvalst2_hu[c] -> MMvalst2_hu[e]                                                          | 0     | 1000 |                                                                | Mouse metabolic/transport demand<br>reaction |
| MMXOLST2b       | MMvalst2_hu[e] <=> MMvalst2_hu[c]                                                         | -1000 | 1000 |                                                                | Mouse metabolic/transport demand<br>reaction |
| MMXOLST2e       | MMvalst2_hu[c] <=> MMvalst2_hu[e]                                                         | -1000 | 1000 |                                                                | Mouse metabolic/transport demand<br>reaction |
| MMXOLTR24c      | MMvalst24[r] <=> MMvalst24[c]                                                             | -1000 | 1000 |                                                                | Mouse metabolic/transport demand<br>reaction |
| MMXOLTR24e      | MMvalst24[c] <=> MMvalst24[e]                                                             | -1000 | 0    |                                                                | Mouse metabolic/transport demand<br>reaction |
| MMXOLTR25c      | MMvalst25[r] <=> MMvalst25[c]                                                             | -1000 | 1000 |                                                                | Mouse metabolic/transport demand<br>reaction |
| MMXOLTR25e      | MMvalst25[c] <=> MMvalst25[e]                                                             | -1000 | 0    |                                                                | Mouse metabolic/transport demand<br>reaction |
| MMXOLTR27c      | MMvalst27[r] <=> MMvalst27[c]                                                             | -1000 | 1000 |                                                                | Mouse metabolic/transport demand<br>reaction |
| MMXOLTR27e      | MMvalst27[c] <=> MMvalst27[e]                                                             | -1000 | 0    |                                                                | Mouse metabolic/transport demand<br>reaction |
| MMXOLTR0Lm      | MMvalst0r[e] <=> MMvalst0r[m]                                                             | -1000 | 1000 |                                                                | Mouse metabolic/transport demand<br>reaction |
| MMXOLTR0Lr      | MMvalst0r[e] <=> MMvalst0r[r]                                                             | -1000 | 1000 |                                                                | Mouse metabolic/transport demand<br>reaction |
| MMXCH2p         | MMvalst0r[r] -> MMvalst0r[e]                                                              | 0     | 1000 |                                                                | Mouse metabolic/transport demand<br>reaction |
| MMXYLK          | MMup[c] + MMbhe-D1c[e] -> MMup[c] + MMbhe[c] + MMbhep-D1c[e]                              | 0     | 1000 |                                                                | Mouse metabolic/transport demand<br>reaction |
| MMXYLTD_Dr      | MMvalst0r[c] + MMbhe[c] <=> MMbhe[c] + MMvalst0r[c] + MMbhe-D1c[e]                        | -1000 | 1000 | 102448.1                                                       | Mouse metabolic/transport demand<br>reaction |
| MMXYLTr         | MMSec_Cb_Ab_X_Gb[r] + MMvalst0r[r] -> MMbhe[r] + MMvalst0r[r] + MMvalst0r[r]              | 0     | 1000 |                                                                | Mouse metabolic/transport demand<br>reaction |
| MMXYLT1         | MMbhe[c] <=> MMbhe[c]                                                                     | 0     | 1000 | 217119.1 or 233781.1                                           | Mouse metabolic/transport demand<br>reaction |
| MMXYLTr         | MMbhe[c] + MMvalst0r[c] + MMbhe-L1c[e] <=> MMvalst0r[c] + MMbhe[c]                        | -1000 | 1000 |                                                                | Mouse metabolic/transport demand<br>reaction |
| MMXYL1          | MMbhe-D1c[e] <=> MMbhe-D1c[e]                                                             | 0     | 1000 | 67880.1                                                        | Mouse metabolic/transport demand<br>reaction |
| MMXYL2y         | MMbhe-D1l[e] -> MMbhe-D1c[e]                                                              | 0     | 1000 | 20527.1                                                        | Mouse metabolic/transport demand<br>reaction |
| MMXYVTE1        | MMbhe[c] -> MMbhe[c]                                                                      | 0     | 1000 |                                                                | Mouse metabolic/transport demand<br>reaction |

|                          |                                                                                                                                                                                                                                                                                                                                                                                                                                                                                                                                                                                                                                                                                                                                                                                                                                                                                                                                                                                                                                                                                        |       |      |  |                                           |
|--------------------------|----------------------------------------------------------------------------------------------------------------------------------------------------------------------------------------------------------------------------------------------------------------------------------------------------------------------------------------------------------------------------------------------------------------------------------------------------------------------------------------------------------------------------------------------------------------------------------------------------------------------------------------------------------------------------------------------------------------------------------------------------------------------------------------------------------------------------------------------------------------------------------------------------------------------------------------------------------------------------------------------------------------------------------------------------------------------------------------|-------|------|--|-------------------------------------------|
| MMBiomass_cmc_1_an_glych | $43.153 \text{ MMb2o}[c] + 43.153 \text{ MMarp}[c] + 0.564 \text{ MMfwa-L}[c] + 0.386 \text{ MMgh-L}[c] + 0.359 \text{ MMarp-L}[c] + 0.033 \text{ MMarp}[c] + 0.0148 \text{ MMarp}[c] + 0.0551 \text{ MMarp}[c] + 0.6 \text{ MMb-L}[c] + 0.2881 \text{ MMb-L}[c] + 0.145 \text{ MMb-L}[c] + 0.322 \text{ MMgh-L}[c] + 0.538 \text{ MMgh}[c] + 0.324 \text{ MMb-L}[c] + 0.219 \text{ MMph-L}[c] + 0.43 \text{ MMb-L}[c] + 0.386 \text{ MMb-L}[c] + 0.377 \text{ MMarp-L}[c] + 0.57 \text{ MMb-L}[c] + 0.138 \text{ MMb-L}[c] + 0.145 \text{ MMb-L}[c] + 0.01 \text{ MMb-L}[c] + 0.069 \text{ MMph-L}[c] + 0.026 \text{ MMph-L}[c] + 0.018 \text{ MMb-L}[c] + 0.001 \text{ MMgh-L}[c] + 0.003 \text{ MMph-L}[c] + 0.0099 \text{ MMarp}[c] + 0.0099 \text{ MMarp}[c] + 0.0148 \text{ MMarp}[c] + 0.0624 \text{ MMarp}[c] + 0.033 \text{ MMarp}[c] + 0.313 \text{ MMph-L}[c] + 0.182 \text{ MMph-L}[c] + 0.044 \text{ MMarp-L}[c] + 0.416 \text{ MMb-L}[c] + 0.003 \text{ MMph-L}[c] + 0.008 \text{ MMph-L}[c] + 0.135 \text{ MMarp}[c] + 43.153 \text{ MMb}[c] + 43.153 \text{ MMarp}[c]$ | 0     | 0    |  | Mouse metabolic/transport demand reaction |
| MMbark_cmc-L             | MMb-L[c] <=>                                                                                                                                                                                                                                                                                                                                                                                                                                                                                                                                                                                                                                                                                                                                                                                                                                                                                                                                                                                                                                                                           | 0     | 0    |  | Mouse metabolic/transport demand reaction |
| MMbark_pre_prot(er)      | MMbpe_prot[c] <=>                                                                                                                                                                                                                                                                                                                                                                                                                                                                                                                                                                                                                                                                                                                                                                                                                                                                                                                                                                                                                                                                      | -1    | 1000 |  | Mouse metabolic/transport demand reaction |
| MM1MNCAMab               | MMb2o[c] + MM1mmar[c] + MMarp[c] -> MMb2p[c] + MMb2[c] + MMb2[c] + MM1mmar[c] <=>                                                                                                                                                                                                                                                                                                                                                                                                                                                                                                                                                                                                                                                                                                                                                                                                                                                                                                                                                                                                      | 0     | 1000 |  | Mouse secretion to outlet (body fluids)   |
| MMEX_1mmar[ab]           | MM1mmar[c] <=>                                                                                                                                                                                                                                                                                                                                                                                                                                                                                                                                                                                                                                                                                                                                                                                                                                                                                                                                                                                                                                                                         | 0     | 1000 |  | Mouse secretion to outlet (body fluids)   |
| MM24NPheab               | MM24qab[c] <=> MM24qab[c]                                                                                                                                                                                                                                                                                                                                                                                                                                                                                                                                                                                                                                                                                                                                                                                                                                                                                                                                                                                                                                                              | -1000 | 1000 |  | Mouse secretion to outlet (body fluids)   |
| MMEX_24qab[ab]           | MM24qab[c] <=>                                                                                                                                                                                                                                                                                                                                                                                                                                                                                                                                                                                                                                                                                                                                                                                                                                                                                                                                                                                                                                                                         | 0     | 1000 |  | Mouse secretion to outlet (body fluids)   |
| MM24_25DIVTID2b          | MM2425divid2[c] -> MM2425divid2[b]                                                                                                                                                                                                                                                                                                                                                                                                                                                                                                                                                                                                                                                                                                                                                                                                                                                                                                                                                                                                                                                     | 0     | 1000 |  | Mouse secretion to outlet (body fluids)   |
| MMEX_2425divid2[ab]      | MM2425divid2[b] <=>                                                                                                                                                                                                                                                                                                                                                                                                                                                                                                                                                                                                                                                                                                                                                                                                                                                                                                                                                                                                                                                                    | 0     | 1000 |  | Mouse secretion to outlet (body fluids)   |
| MM24_25DIVTID3b          | MM2425divid3[c] -> MM2425divid3[b]                                                                                                                                                                                                                                                                                                                                                                                                                                                                                                                                                                                                                                                                                                                                                                                                                                                                                                                                                                                                                                                     | 0     | 1000 |  | Mouse secretion to outlet (body fluids)   |
| MMEX_2425divid3[ab]      | MM2425divid3[b] <=>                                                                                                                                                                                                                                                                                                                                                                                                                                                                                                                                                                                                                                                                                                                                                                                                                                                                                                                                                                                                                                                                    | 0     | 1000 |  | Mouse secretion to outlet (body fluids)   |
| MM25DIVTID2b             | MM25divid2[c] -> MM25divid2[b]                                                                                                                                                                                                                                                                                                                                                                                                                                                                                                                                                                                                                                                                                                                                                                                                                                                                                                                                                                                                                                                         | 0     | 1000 |  | Mouse secretion to outlet (body fluids)   |
| MM25DIVTID2ab            | MM25divid2[b] -> MM25divid2[c]                                                                                                                                                                                                                                                                                                                                                                                                                                                                                                                                                                                                                                                                                                                                                                                                                                                                                                                                                                                                                                                         | 0     | 1000 |  | Mouse secretion to outlet (body fluids)   |
| MMEX_25divid2[ab]        | MM25divid2[b] <=>                                                                                                                                                                                                                                                                                                                                                                                                                                                                                                                                                                                                                                                                                                                                                                                                                                                                                                                                                                                                                                                                      | 0     | 1000 |  | Mouse secretion to outlet (body fluids)   |
| MM25DIVTID3b             | MM25divid3[c] -> MM25divid3[b]                                                                                                                                                                                                                                                                                                                                                                                                                                                                                                                                                                                                                                                                                                                                                                                                                                                                                                                                                                                                                                                         | 0     | 1000 |  | Mouse secretion to outlet (body fluids)   |
| MM25DIVTID3ab            | MM25divid3[b] -> MM25divid3[c]                                                                                                                                                                                                                                                                                                                                                                                                                                                                                                                                                                                                                                                                                                                                                                                                                                                                                                                                                                                                                                                         | 0     | 1000 |  | Mouse secretion to outlet (body fluids)   |
| MMEX_25divid3[ab]        | MM25divid3[b] <=>                                                                                                                                                                                                                                                                                                                                                                                                                                                                                                                                                                                                                                                                                                                                                                                                                                                                                                                                                                                                                                                                      | 0     | 1000 |  | Mouse secretion to outlet (body fluids)   |
| MM25HB2b                 | MM25hb[c] + MMb[c] <=> MMb[c] + MM25hb[c]                                                                                                                                                                                                                                                                                                                                                                                                                                                                                                                                                                                                                                                                                                                                                                                                                                                                                                                                                                                                                                              | -1000 | 1000 |  | Mouse secretion to outlet (body fluids)   |
| MMEX_25hb[ab]            | MM25hb[c] <=>                                                                                                                                                                                                                                                                                                                                                                                                                                                                                                                                                                                                                                                                                                                                                                                                                                                                                                                                                                                                                                                                          | 0     | 1000 |  | Mouse secretion to outlet (body fluids)   |
| MM4BPPO_1T3b             | MMb[b] + MM4bp-LT[b] -> MMb[c] + MM4bp-LT[c]                                                                                                                                                                                                                                                                                                                                                                                                                                                                                                                                                                                                                                                                                                                                                                                                                                                                                                                                                                                                                                           | -1000 | 1000 |  | Mouse secretion to outlet (body fluids)   |
| MMABUT3b                 | MMb[b] + MM4ab[b] <=> MMb[c] + MM4ab[c]                                                                                                                                                                                                                                                                                                                                                                                                                                                                                                                                                                                                                                                                                                                                                                                                                                                                                                                                                                                                                                                | -1000 | 1000 |  | Mouse secretion to outlet (body fluids)   |
| MMACAC2b                 | MMb[b] + MMacac[b] <=> MMb[c] + MMacac[c]                                                                                                                                                                                                                                                                                                                                                                                                                                                                                                                                                                                                                                                                                                                                                                                                                                                                                                                                                                                                                                              | -1000 | 1000 |  | Mouse secretion to outlet (body fluids)   |
| MMACETON3b               | MMb[b] + MMacetone[b] <=> MMb[c] + MMacetone[c]                                                                                                                                                                                                                                                                                                                                                                                                                                                                                                                                                                                                                                                                                                                                                                                                                                                                                                                                                                                                                                        | -1000 | 1000 |  | Mouse secretion to outlet (body fluids)   |
| MMACHab                  | MMach[b] + MMb2o[b] -> MMb[b] + MMach[b] + MMach[b]                                                                                                                                                                                                                                                                                                                                                                                                                                                                                                                                                                                                                                                                                                                                                                                                                                                                                                                                                                                                                                    | 0     | 1000 |  | Mouse secretion to outlet (body fluids)   |
| MMAC22b                  | MMb[b] + MMach[b] <=> MMb[c] + MMach[c]                                                                                                                                                                                                                                                                                                                                                                                                                                                                                                                                                                                                                                                                                                                                                                                                                                                                                                                                                                                                                                                | -1000 | 1000 |  | Mouse secretion to outlet (body fluids)   |
| MMADAcab                 | MMb[b] + MMb2o[b] + MMach[b] -> MMb[b] + MMach[b]                                                                                                                                                                                                                                                                                                                                                                                                                                                                                                                                                                                                                                                                                                                                                                                                                                                                                                                                                                                                                                      | 0     | 1000 |  | Mouse secretion to outlet (body fluids)   |
| MMALAC2b                 | MMb[b] + MMala-L[b] <=> MMb[c] + MMala-L[c]                                                                                                                                                                                                                                                                                                                                                                                                                                                                                                                                                                                                                                                                                                                                                                                                                                                                                                                                                                                                                                            | -1000 | 1000 |  | Mouse secretion to outlet (body fluids)   |
| MMALA2N1b                | MMb[c] + MMala-L[b] + 2 MMala-L[b] <=> 2 MMala-L[c] + MMala-L[c] + MMb[b]                                                                                                                                                                                                                                                                                                                                                                                                                                                                                                                                                                                                                                                                                                                                                                                                                                                                                                                                                                                                              | -1000 | 1000 |  | Mouse secretion to outlet (body fluids)   |
| MMALAALAT3b              | MMarg-L[c] + MMb[b] + MMala-L[b] -> MMb[c] + MMala-L[c] + MMarg-L[b]                                                                                                                                                                                                                                                                                                                                                                                                                                                                                                                                                                                                                                                                                                                                                                                                                                                                                                                                                                                                                   | 0     | 1000 |  | Mouse secretion to outlet (body fluids)   |
| MMASNN1b                 | MMb[c] + 2 MMala-L[b] + MMala-L[b] <=> 2 MMala-L[c] + MMala-L[c] + MMb[b]                                                                                                                                                                                                                                                                                                                                                                                                                                                                                                                                                                                                                                                                                                                                                                                                                                                                                                                                                                                                              | -1000 | 1000 |  | Mouse secretion to outlet (body fluids)   |
| MMASPDab                 | MMb[c] + MMb[b] + 3 MMala-L[b] + MMarp-D[b] -> MMb[c] + 3 MMala-L[c] + MMarp-D[c] + MMb[b]                                                                                                                                                                                                                                                                                                                                                                                                                                                                                                                                                                                                                                                                                                                                                                                                                                                                                                                                                                                             | 0     | 1000 |  | Mouse secretion to outlet (body fluids)   |
| MMASPDab                 | MMb[c] + MMb[b] + 3 MMala-L[b] + MMarp-L[b] -> MMb[c] + 3 MMala-L[c] + MMarp-L[c] + MMb[b]                                                                                                                                                                                                                                                                                                                                                                                                                                                                                                                                                                                                                                                                                                                                                                                                                                                                                                                                                                                             | 0     | 1000 |  | Mouse secretion to outlet (body fluids)   |
| MMATPH1ab                | 2 MMb2o[b] + MMarp[b] -> 2 MMb[b] + MMarp[b] + 2 MMp[b]                                                                                                                                                                                                                                                                                                                                                                                                                                                                                                                                                                                                                                                                                                                                                                                                                                                                                                                                                                                                                                | 0     | 1000 |  | Mouse secretion to outlet (body fluids)   |
| MMATPD2b                 | MMb2o[b] + MMarp[b] -> MMb[b] + MMarp[b] + MMp[b]                                                                                                                                                                                                                                                                                                                                                                                                                                                                                                                                                                                                                                                                                                                                                                                                                                                                                                                                                                                                                                      | 0     | 1000 |  | Mouse secretion to outlet (body fluids)   |
| MMBGLC3b                 | MMb[b] + MMb2o[b] <=> MMb[c] + MMb2o[c]                                                                                                                                                                                                                                                                                                                                                                                                                                                                                                                                                                                                                                                                                                                                                                                                                                                                                                                                                                                                                                                | -1000 | 1000 |  | Mouse secretion to outlet (body fluids)   |
| MMBGLUC3b                | MMb[b] + MMb2o[b] <=> MMb[c] + MMb2o[c]                                                                                                                                                                                                                                                                                                                                                                                                                                                                                                                                                                                                                                                                                                                                                                                                                                                                                                                                                                                                                                                | -1000 | 1000 |  | Mouse secretion to outlet (body fluids)   |
| MMBGLUTCH3b              | MMb[b] + MMb2o[b] <=> MMb[c] + MMb2o[c]                                                                                                                                                                                                                                                                                                                                                                                                                                                                                                                                                                                                                                                                                                                                                                                                                                                                                                                                                                                                                                                | -1000 | 1000 |  | Mouse secretion to outlet (body fluids)   |
| MMBGLUTDECH3b            | MMb[b] + MMb2o[b] <=> MMb[c] + MMb2o[c]                                                                                                                                                                                                                                                                                                                                                                                                                                                                                                                                                                                                                                                                                                                                                                                                                                                                                                                                                                                                                                                | -1000 | 1000 |  | Mouse secretion to outlet (body fluids)   |
| MMBIB3b                  | MMb[b] + MMb2o[b] <=> MMb[c] + MMb2o[c]                                                                                                                                                                                                                                                                                                                                                                                                                                                                                                                                                                                                                                                                                                                                                                                                                                                                                                                                                                                                                                                | -1000 | 1000 |  | Mouse secretion to outlet (body fluids)   |
| MMBTN2b                  | MMb[b] + MMb2o[b] <=> MMb[c] + MMb2o[c]                                                                                                                                                                                                                                                                                                                                                                                                                                                                                                                                                                                                                                                                                                                                                                                                                                                                                                                                                                                                                                                | -1000 | 1000 |  | Mouse secretion to outlet (body fluids)   |
| MMBTN3ab                 | MMb[c] + MMb2o[b] -> MMb[b] + MMb2o[b]                                                                                                                                                                                                                                                                                                                                                                                                                                                                                                                                                                                                                                                                                                                                                                                                                                                                                                                                                                                                                                                 | 0     | 1000 |  | Mouse secretion to outlet (body fluids)   |
| MMBUT2b                  | MMb[b] + MMb2o[b] <=> MMb[c] + MMb2o[c]                                                                                                                                                                                                                                                                                                                                                                                                                                                                                                                                                                                                                                                                                                                                                                                                                                                                                                                                                                                                                                                | -1000 | 1000 |  | Mouse secretion to outlet (body fluids)   |
| MMCAATPSb                | MMb2o[c] + MMarp[c] + 2 MMa2L[c] -> MMb2p[c] + MMarp[c] + MMb2o[c] + 2 MMa2L[c]                                                                                                                                                                                                                                                                                                                                                                                                                                                                                                                                                                                                                                                                                                                                                                                                                                                                                                                                                                                                        | 0     | 1000 |  | Mouse secretion to outlet (body fluids)   |
| MMCGLY3_2_b              | 2 MMb[b] + MMggh[b] -> 2 MMb[c] + MMggh[c]                                                                                                                                                                                                                                                                                                                                                                                                                                                                                                                                                                                                                                                                                                                                                                                                                                                                                                                                                                                                                                             | 0     | 1000 |  | Mouse secretion to outlet (body fluids)   |
| MMCRN3ab                 | MMcnc[c] + MMb[b] -> MMb[c] + MMcnc[b]                                                                                                                                                                                                                                                                                                                                                                                                                                                                                                                                                                                                                                                                                                                                                                                                                                                                                                                                                                                                                                                 | 0     | 1000 |  | Mouse secretion to outlet (body fluids)   |
| MMDADAb                  | MMb[b] + MMb2o[b] + MMb2o-L[b] -> MMb2o[b] + MMb2o[b]                                                                                                                                                                                                                                                                                                                                                                                                                                                                                                                                                                                                                                                                                                                                                                                                                                                                                                                                                                                                                                  | 0     | 1000 |  | Mouse secretion to outlet (body fluids)   |
| MMDALAC2b                | MMb[b] + MMala-D[b] <=> MMb[c] + MMala-D[c]                                                                                                                                                                                                                                                                                                                                                                                                                                                                                                                                                                                                                                                                                                                                                                                                                                                                                                                                                                                                                                            | -1000 | 1000 |  | Mouse secretion to outlet (body fluids)   |
| MMD_LAC2b                | MMb[b] + MMala-D[b] <=> MMb[c] + MMala-D[c]                                                                                                                                                                                                                                                                                                                                                                                                                                                                                                                                                                                                                                                                                                                                                                                                                                                                                                                                                                                                                                            | -1000 | 1000 |  | Mouse secretion to outlet (body fluids)   |
| MMEX_3acab               | MMb[b] <=>                                                                                                                                                                                                                                                                                                                                                                                                                                                                                                                                                                                                                                                                                                                                                                                                                                                                                                                                                                                                                                                                             | -100  | 1000 |  | Mouse secretion to outlet (body fluids)   |
| MMFUR2ab                 | MMb2o-L[b] + 2 MMb2o[b] -> 2 MMb[b] + MMb2o-L[b] + 2 MMb2o[b]                                                                                                                                                                                                                                                                                                                                                                                                                                                                                                                                                                                                                                                                                                                                                                                                                                                                                                                                                                                                                          | 0     | 1000 |  | Mouse secretion to outlet (body fluids)   |
| MMGLA2_2b                | 2 MMb[b] + MMggh[b] <=> 2 MMb[c] + MMggh[c]                                                                                                                                                                                                                                                                                                                                                                                                                                                                                                                                                                                                                                                                                                                                                                                                                                                                                                                                                                                                                                            | -1000 | 1000 |  | Mouse secretion to outlet (body fluids)   |
| MMGLC2_2b                | 2 MMb[b] + MMggh-D[b] <=> 2 MMb[c] + MMggh-D[c]                                                                                                                                                                                                                                                                                                                                                                                                                                                                                                                                                                                                                                                                                                                                                                                                                                                                                                                                                                                                                                        | -1000 | 1000 |  | Mouse secretion to outlet (body fluids)   |
| MMGLC22b                 | MMb[b] + MMggh-D[b] <=> MMb[c] + MMggh-D[c]                                                                                                                                                                                                                                                                                                                                                                                                                                                                                                                                                                                                                                                                                                                                                                                                                                                                                                                                                                                                                                            | -1000 | 1000 |  | Mouse secretion to outlet (body fluids)   |
| MMGLNN1b                 | MMb[c] + 2 MMala-L[b] + MMggh-L[b] <=> 2 MMala-L[c] + MMggh-L[c] + MMb[b]                                                                                                                                                                                                                                                                                                                                                                                                                                                                                                                                                                                                                                                                                                                                                                                                                                                                                                                                                                                                              | -1000 | 1000 |  | Mouse secretion to outlet (body fluids)   |
| MMGLNLAT3b               | MMarg-L[c] + MMb[b] + MMggh-L[b] -> MMb[c] + MMggh-L[c] + MMarg-L[b]                                                                                                                                                                                                                                                                                                                                                                                                                                                                                                                                                                                                                                                                                                                                                                                                                                                                                                                                                                                                                   | 0     | 1000 |  | Mouse secretion to outlet (body fluids)   |
| MMGLU3ab                 | MMb[c] + MMb[b] + 3 MMala-L[b] + MMggh-L[b] -> MMb[c] + 3 MMala-L[c] + MMggh-L[c] + MMb[b]                                                                                                                                                                                                                                                                                                                                                                                                                                                                                                                                                                                                                                                                                                                                                                                                                                                                                                                                                                                             | 0     | 1000 |  | Mouse secretion to outlet (body fluids)   |
| MMGLYGLYb                | MMb[b] + MMgghy[b] <=> MMb[c] + MMgghy[c]                                                                                                                                                                                                                                                                                                                                                                                                                                                                                                                                                                                                                                                                                                                                                                                                                                                                                                                                                                                                                                              | -1000 | 1000 |  | Mouse secretion to outlet (body fluids)   |
| MMGLYPH3b                | MMb[b] + MMgghy[b] <=> MMb[c] + MMgghy[c]                                                                                                                                                                                                                                                                                                                                                                                                                                                                                                                                                                                                                                                                                                                                                                                                                                                                                                                                                                                                                                              | -1000 | 1000 |  | Mouse secretion to outlet (body fluids)   |
| MMGLYSARb                | MMb[b] + MMgghy[b] <=> MMb[c] + MMgghy[c]                                                                                                                                                                                                                                                                                                                                                                                                                                                                                                                                                                                                                                                                                                                                                                                                                                                                                                                                                                                                                                              | -1000 | 1000 |  | Mouse secretion to outlet (body fluids)   |
| MMGLY2b                  | MMb[b] + MMgghy[b] <=> MMb[c] + MMgghy[c]                                                                                                                                                                                                                                                                                                                                                                                                                                                                                                                                                                                                                                                                                                                                                                                                                                                                                                                                                                                                                                              | -1000 | 1000 |  | Mouse secretion to outlet (body fluids)   |
| MMGUMDCHAb               | MMb[b] + MMgghy[b] <=> MMb[c] + MMgghy[c]                                                                                                                                                                                                                                                                                                                                                                                                                                                                                                                                                                                                                                                                                                                                                                                                                                                                                                                                                                                                                                              | -1000 | 1000 |  | Mouse secretion to outlet (body fluids)   |
| MMGUMGCHAb               | MMb[b] + MMgghy[b] <=> MMb[c] + MMgghy[c]                                                                                                                                                                                                                                                                                                                                                                                                                                                                                                                                                                                                                                                                                                                                                                                                                                                                                                                                                                                                                                              | -1000 | 1000 |  | Mouse secretion to outlet (body fluids)   |
| MMGLUTCH3b               | MMb[b] + MMgghy[b] <=> MMb[c] + MMgghy[c]                                                                                                                                                                                                                                                                                                                                                                                                                                                                                                                                                                                                                                                                                                                                                                                                                                                                                                                                                                                                                                              | -1000 | 1000 |  | Mouse secretion to outlet (body fluids)   |
| MMGUM3ab                 | MMb[b] + MMgghy[b] <=> MMb[c] + MMgghy[c]                                                                                                                                                                                                                                                                                                                                                                                                                                                                                                                                                                                                                                                                                                                                                                                                                                                                                                                                                                                                                                              | -1000 | 1000 |  | Mouse secretion to outlet (body fluids)   |
| MMHSNN1b                 | MMb[c] + 2 MMala-L[b] + MMggh-L[b] <=> 2 MMala-L[c] + MMggh-L[c] + MMb[b]                                                                                                                                                                                                                                                                                                                                                                                                                                                                                                                                                                                                                                                                                                                                                                                                                                                                                                                                                                                                              | -1000 | 1000 |  | Mouse secretion to outlet (body fluids)   |
| MMHSNLAT3b               | MMarg-L[c] + MMb[b] + MMggh-L[b] -> MMb[c] + MMggh-L[c] + MMarg-L[b]                                                                                                                                                                                                                                                                                                                                                                                                                                                                                                                                                                                                                                                                                                                                                                                                                                                                                                                                                                                                                   | 0     | 1000 |  | Mouse secretion to outlet (body fluids)   |
| MMHKb                    | MMb2o[c] + MMarp[c] + MMb[b] -> MMb2p[c] + MMarp[c] + MMb[b]                                                                                                                                                                                                                                                                                                                                                                                                                                                                                                                                                                                                                                                                                                                                                                                                                                                                                                                                                                                                                           | 0     | 1000 |  | Mouse secretion to outlet (body fluids)   |
| MMNST22b                 | MMb[b] + MMNST2b <=> MMb[c] + MMNST2b                                                                                                                                                                                                                                                                                                                                                                                                                                                                                                                                                                                                                                                                                                                                                                                                                                                                                                                                                                                                                                                  | -1000 | 1000 |  | Mouse secretion to outlet (body fluids)   |
| MMELUGLYb                | MMb[b] + MMNST2b <=> MMb[c] + MMNST2b                                                                                                                                                                                                                                                                                                                                                                                                                                                                                                                                                                                                                                                                                                                                                                                                                                                                                                                                                                                                                                                  | 0     | 1000 |  | Mouse secretion to outlet (body fluids)   |
| MMELUL3b                 | MMb[b] + MMNST2b <=> MMb[c] + MMNST2b                                                                                                                                                                                                                                                                                                                                                                                                                                                                                                                                                                                                                                                                                                                                                                                                                                                                                                                                                                                                                                                  | 0     | 1000 |  | Mouse secretion to outlet (body fluids)   |
| MMELULAT3b               | MMarg-L[c] + MMb[b] + MMNST2b <=> MMb[c] + MMNST2b + MMarg-L[c]                                                                                                                                                                                                                                                                                                                                                                                                                                                                                                                                                                                                                                                                                                                                                                                                                                                                                                                                                                                                                        | 0     | 1000 |  | Mouse secretion to outlet (body fluids)   |
| MMELPS2ab                | MMb2o[b] + MMargy[b] -> MMb[b] + MMELPS2b                                                                                                                                                                                                                                                                                                                                                                                                                                                                                                                                                                                                                                                                                                                                                                                                                                                                                                                                                                                                                                              | 0     | 1000 |  | Mouse secretion to outlet (body fluids)   |
| MMELPS3ab                | MMb2o[b] + MMargy[b] -> MMb[b] + MMELPS3b                                                                                                                                                                                                                                                                                                                                                                                                                                                                                                                                                                                                                                                                                                                                                                                                                                                                                                                                                                                                                                              | 0     | 1000 |  | Mouse secretion to outlet (body fluids)   |
| MMELPS4ab                | MMb2o[b] + MMargy[b] -> MMb[b] + MMELPS4b                                                                                                                                                                                                                                                                                                                                                                                                                                                                                                                                                                                                                                                                                                                                                                                                                                                                                                                                                                                                                                              | 0     | 1000 |  | Mouse secretion to outlet (body fluids)   |
| MMELPS5ab                | MMb2o[b] + MMargy[b] -> MMb[b] + MMELPS5b                                                                                                                                                                                                                                                                                                                                                                                                                                                                                                                                                                                                                                                                                                                                                                                                                                                                                                                                                                                                                                              | 0     | 1000 |  | Mouse secretion to outlet (body fluids)   |
| MMEL_LAC2b               | MMb[b] + MMNST2b <=> MMb[c] + MMNST2b                                                                                                                                                                                                                                                                                                                                                                                                                                                                                                                                                                                                                                                                                                                                                                                                                                                                                                                                                                                                                                                  | -1000 | 1000 |  | Mouse secretion to outlet (body fluids)   |
| MMELYLAT3b               | MMarg-L[c] + MMb[b] + MMNST2b <=> MMb[c] + MMNST2b + MMarg-L[c]                                                                                                                                                                                                                                                                                                                                                                                                                                                                                                                                                                                                                                                                                                                                                                                                                                                                                                                                                                                                                        | 0     | 1000 |  | Mouse secretion to outlet (body fluids)   |

|                |                                                                                                                 |       |      |  |                                         |
|----------------|-----------------------------------------------------------------------------------------------------------------|-------|------|--|-----------------------------------------|
| MMNADN6b       | $MMb2a[b] + MMbnd[b] \rightarrow MMb[b] + MMdnpq[b] + MMbcan[b]$                                                | 0     | 1000 |  | Mouse secretion to outlet (body fluids) |
| MMNADP9ab      | $MMb2a[b] + MMbnd[b] \rightarrow MMb[b] + MMbcan[b] + MMdnpq[b]$                                                | 0     | 1000 |  | Mouse secretion to outlet (body fluids) |
| MMNAHCO3_HCLab | $MMb[c] + MMd[c] + MMnai[b] + MMbco3[b] \leftrightarrow MMbco3[c] + MMnai[c] + MMb[h] + MMbcl$                  | -1000 | 1000 |  | Mouse secretion to outlet (body fluids) |
| MMNACl_1b      | $MMnai[c] + MMb[b] \leftrightarrow MMb[c] + MMnai[b]$                                                           | -1000 | 1000 |  | Mouse secretion to outlet (body fluids) |
| MMNDP10ab      | $MMb2a[b] + MMdnp[b] \rightarrow MMb[b] + MMd[b] + MMdnpq[b]$                                                   | 0     | 1000 |  | Mouse secretion to outlet (body fluids) |
| MMNDP7ab       | $MMb2a[b] + MMdnpq[b] \rightarrow MMb[b] + MMd[b] + MMdnpq[b]$                                                  | 0     | 1000 |  | Mouse secretion to outlet (body fluids) |
| MMNDP9ab       | $MMb2a[b] + MMdnpq[b] \rightarrow MMb[b] + MMd[b] + MMdnpq[b]$                                                  | 0     | 1000 |  | Mouse secretion to outlet (body fluids) |
| MMNH43ab       | $MMbnd[c] + MMb[b] \leftrightarrow MMb[c] + MMbnd[b]$                                                           | -1000 | 1000 |  | Mouse secretion to outlet (body fluids) |
| MMNTP3ab       | $MMb2a[b] + MMdnpq[b] \rightarrow MMb[b] + MMd[b] + MMdnpq[b]$                                                  | 0     | 1000 |  | Mouse secretion to outlet (body fluids) |
| MMPAFHab       | $MMb2a[b] + MMdnpq_3ab[b] \rightarrow MMb[b] + MMbnd[b] + MMdnpq_3ab[b]$                                        | 0     | 1000 |  | Mouse secretion to outlet (body fluids) |
| MMPECTCH6b     | $MMb[b] + MMpectindachab[b] \leftrightarrow MMb[c] + MMpectindach[c]$                                           | -1000 | 1000 |  | Mouse secretion to outlet (body fluids) |
| MMPECTCH4ab    | $MMb[b] + MMpectingab[b] \leftrightarrow MMb[c] + MMpectingab[c]$                                               | -1000 | 1000 |  | Mouse secretion to outlet (body fluids) |
| MMPECTCH4b     | $MMb[b] + MMpectindachab[b] \leftrightarrow MMb[c] + MMpectindach[c]$                                           | -1000 | 1000 |  | Mouse secretion to outlet (body fluids) |
| MMPECT6b       | $MMb[b] + MMpect[b] \leftrightarrow MMb[c] + MMpect[c]$                                                         | -1000 | 1000 |  | Mouse secretion to outlet (body fluids) |
| MMPFH5LAthab   | $MMarg_1L[c] + MMb[b] + MMbpe_1L[b] \rightarrow MMb[c] + MMbpe_1L[c] + MMarg_1L[b]$                             | 0     | 1000 |  | Mouse secretion to outlet (body fluids) |
| MMPROD2ab      | $MMb[b] + MMpro-D[b] \leftrightarrow MMb[c] + MMpro-D[c]$                                                       | -1000 | 1000 |  | Mouse secretion to outlet (body fluids) |
| MMPROGLYb      | $MMb[b] + MMprugh[b] \rightarrow MMb[c] + MMprugh[c]$                                                           | 0     | 1000 |  | Mouse secretion to outlet (body fluids) |
| MMPRO2ab       | $MMb[b] + MMpro-L[b] \leftrightarrow MMb[c] + MMpro-L[c]$                                                       | -1000 | 1000 |  | Mouse secretion to outlet (body fluids) |
| MMPSYGC4b      | $MMb[b] + MMpsychab[b] \leftrightarrow MMb[c] + MMpsychab[c]$                                                   | -1000 | 1000 |  | Mouse secretion to outlet (body fluids) |
| MMPSYL4b       | $MMb[b] + MMpsyb[b] \leftrightarrow MMb[c] + MMpsyb[c]$                                                         | -1000 | 1000 |  | Mouse secretion to outlet (body fluids) |
| MMPSYTC4b      | $MMb[b] + MMpsychab[b] \leftrightarrow MMb[c] + MMpsychab[c]$                                                   | -1000 | 1000 |  | Mouse secretion to outlet (body fluids) |
| MMPSYTDCH6b    | $MMb[b] + MMpsychab[b] \leftrightarrow MMb[c] + MMpsychab[c]$                                                   | -1000 | 1000 |  | Mouse secretion to outlet (body fluids) |
| MMPYR2ab       | $MMb[b] + MMpryb[b] \leftrightarrow MMb[c] + MMpryb[c]$                                                         | -1000 | 1000 |  | Mouse secretion to outlet (body fluids) |
| MMRETH1ab      | $MMb2a[b] + MM9-cis-estab[b] \rightarrow MMb[b] + MMbndab2[b] + MMrethol-9-cis[b]$                              | 0     | 1000 |  | Mouse secretion to outlet (body fluids) |
| MMRETH2ab      | $MMb2a[b] + MM1-1-cis-estab[b] \rightarrow MMb[b] + MMbndab2[b] + MMrethol-1-cis[b]$                            | 0     | 1000 |  | Mouse secretion to outlet (body fluids) |
| MMRETH4ab      | $MMb2a[b] + MMrethab[b] \rightarrow MMb[b] + MMbndab2[b] + MMrethol[b]$                                         | 0     | 1000 |  | Mouse secretion to outlet (body fluids) |
| MMRIB2b        | $MMb[b] + MMab-D[b] \rightarrow MMb[c] + MMab-D[c]$                                                             | 0     | 1000 |  | Mouse secretion to outlet (body fluids) |
| MMSERBN1b      | $MMb[c] + 2 MMnai[b] + MMser-L[b] \leftrightarrow 2 MMnai[c] + MMser-L[c] + MMb[b]$                             | -1000 | 1000 |  | Mouse secretion to outlet (body fluids) |
| MMSPDM4ab      | $2 MMb[b] + 2 MMd2a[b] \rightarrow MMb2a2[b] + MMd2[b]$                                                         | 0     | 1000 |  | Mouse secretion to outlet (body fluids) |
| MMTHM43b       | $MMb[c] + MMthab[b] \leftrightarrow MMbnd[c] + MMb[b]$                                                          | -1000 | 1000 |  | Mouse secretion to outlet (body fluids) |
| MMTHCO1_NAb    | $MMnai[b] + 2 MMbco3[b] \leftrightarrow 2 MMbco3[c] + MMnai[c]$                                                 | -1000 | 1000 |  | Mouse secretion to outlet (body fluids) |
| MMTHCO1_NAb    | $MMnai[b] + 3 MMbco3[b] \leftrightarrow 3 MMbco3[c] + MMnai[c]$                                                 | -1000 | 1000 |  | Mouse secretion to outlet (body fluids) |
| MMBILRUB2b     | $MMbco3[c] + MMbndab[b] \leftrightarrow MMbndab[c] + MMbco3[b]$                                                 | -1000 | 1000 |  | Mouse secretion to outlet (body fluids) |
| MMCLHCO3ec2b   | $MMbco3[c] + 2 MMd2[b] \rightarrow 2 MMd[c] + MMbco3[b]$                                                        | 0     | 1000 |  | Mouse secretion to outlet (body fluids) |
| MMCLHCO3ab     | $2 MMbco3[c] + MMd[c] \rightarrow MMd[c] + 2 MMbco3[b]$                                                         | 0     | 1000 |  | Mouse secretion to outlet (body fluids) |
| MMEX_3c3e9b    | $MMbco3[b] \leftrightarrow$                                                                                     | -100  | 1000 |  | Mouse secretion to outlet (body fluids) |
| MMHCO3_CL4b    | $MMd[c] + MMbco3[b] \leftrightarrow MMbco3[c] + MMd[b]$                                                         | -1000 | 1000 |  | Mouse secretion to outlet (body fluids) |
| MMHCO3_NAb     | $MMnai[b] + MMbco3[b] \leftrightarrow MMbco3[c] + MMnai[c]$                                                     | -1000 | 1000 |  | Mouse secretion to outlet (body fluids) |
| MMOXAHCO3ab    | $2 MMbco3[c] + MMoxab[b] \leftrightarrow MMoxa[c] + 2 MMbco3[b]$                                                | 0     | 1000 |  | Mouse secretion to outlet (body fluids) |
| MMPROSTGE2b    | $MMbco3[c] + MMprong2[b] \leftrightarrow MMprong2[c] + MMbco3[b]$                                               | -1000 | 1000 |  | Mouse secretion to outlet (body fluids) |
| MMPROSTGE1ab   | $MMbco3[c] + MMprong1[b] \leftrightarrow MMprong1[c] + MMbco3[b]$                                               | -1000 | 1000 |  | Mouse secretion to outlet (body fluids) |
| MMPROSTGE2b    | $MMbco3[c] + MMprong2[b] \leftrightarrow MMprong2[c] + MMbco3[b]$                                               | -1000 | 1000 |  | Mouse secretion to outlet (body fluids) |
| MMPROSTGE2b    | $MMbco3[c] + MMprong2[b] \leftrightarrow MMprong2[c] + MMbco3[b]$                                               | -1000 | 1000 |  | Mouse secretion to outlet (body fluids) |
| MMPROSTGE2b    | $MMbco3[c] + MMprong2[b] \leftrightarrow MMprong2[c] + MMbco3[b]$                                               | -1000 | 1000 |  | Mouse secretion to outlet (body fluids) |
| MMSO4HCO3ab    | $2 MMbco3[c] + MMso4[b] \rightarrow MMso4[c] + 2 MMbco3[b]$                                                     | 0     | 1000 |  | Mouse secretion to outlet (body fluids) |
| MMABUTH_2_ab   | $MM4abab[b] + 2 MMnai[b] \leftrightarrow 2 MMnai[c] + MM4abab[c]$                                               | -1000 | 1000 |  | Mouse secretion to outlet (body fluids) |
| MMADN6b        | $MMdab[b] + MMnai[b] \rightarrow MMnai[c] + MMdab[c]$                                                           | 0     | 1000 |  | Mouse secretion to outlet (body fluids) |
| MMADN6b        | $MMdab[b] + 2 MMnai[b] \rightarrow 2 MMnai[c] + MMdab[c]$                                                       | 0     | 1000 |  | Mouse secretion to outlet (body fluids) |
| MMAKG4_3b      | $3 MMnai[b] + MMakg3b[b] \leftrightarrow MMakg3[c] + 3 MMnai[c]$                                                | -1000 | 1000 |  | Mouse secretion to outlet (body fluids) |
| MMALASNNaFab   | $MMdso-L[c] + MMab-L[b] + MMnai[b] \rightarrow MMnai[c] + MMab-L[c] + MMdso-L[b]$                               | 0     | 1000 |  | Mouse secretion to outlet (body fluids) |
| MMALACYSNaFab  | $MMcys-L[c] + MMab-L[b] + MMnai[b] \rightarrow MMnai[c] + MMab-L[c] + MMcys-L[b]$                               | 0     | 1000 |  | Mouse secretion to outlet (body fluids) |
| MMALAGLNNaFab  | $MMgho-L[c] + MMab-L[b] + MMnai[b] \rightarrow MMnai[c] + MMab-L[c] + MMgho-L[b]$                               | 0     | 1000 |  | Mouse secretion to outlet (body fluids) |
| MMALASERNaFab  | $MMser-L[c] + MMab-L[b] + MMnai[b] \rightarrow MMnai[c] + MMab-L[c] + MMser-L[b]$                               | 0     | 1000 |  | Mouse secretion to outlet (body fluids) |
| MMALATHRNaFab  | $MMthr-L[c] + MMab-L[b] + MMnai[b] \rightarrow MMnai[c] + MMab-L[c] + MMthr-L[b]$                               | 0     | 1000 |  | Mouse secretion to outlet (body fluids) |
| MMAL4ab        | $MMab-L[b] + MMnai[b] \rightarrow MMnai[c] + MMab-L[c]$                                                         | 0     | 1000 |  | Mouse secretion to outlet (body fluids) |
| MMAL4LAthab    | $MMarg-L[c] + MMab-L[b] + MMnai[b] \rightarrow MMnai[c] + MMab-L[c] + MMarg-L[b]$                               | 0     | 1000 |  | Mouse secretion to outlet (body fluids) |
| MMARG4ab       | $MMnai[b] + MMarg-L[b] \rightarrow MMnai[c] + MMarg-L[c]$                                                       | 0     | 1000 |  | Mouse secretion to outlet (body fluids) |
| MMASC3b4b      | $MMnai[b] + MMasch-L[b] \leftrightarrow MMnai[c] + MMasch-L[c]$                                                 | -1000 | 1000 |  | Mouse secretion to outlet (body fluids) |
| MMASNALANaFab  | $MMab-L[c] + MMnai[b] + MMasn-L[b] \rightarrow MMnai[c] + MMasn-L[c] + MMab-L[b]$                               | 0     | 1000 |  | Mouse secretion to outlet (body fluids) |
| MMASYSNaFab    | $MMcys-L[c] + MMnai[b] + MMasn-L[b] \rightarrow MMnai[c] + MMasn-L[c] + MMcys-L[b]$                             | 0     | 1000 |  | Mouse secretion to outlet (body fluids) |
| MMASGLNNaFab   | $MMgho-L[c] + MMnai[b] + MMasn-L[b] \rightarrow MMnai[c] + MMasn-L[c] + MMgho-L[b]$                             | 0     | 1000 |  | Mouse secretion to outlet (body fluids) |
| MMASERNaFab    | $MMser-L[c] + MMnai[b] + MMasn-L[b] \rightarrow MMnai[c] + MMasn-L[c] + MMser-L[b]$                             | 0     | 1000 |  | Mouse secretion to outlet (body fluids) |
| MMASVTRNaFab   | $MMthr-L[c] + MMnai[b] + MMasn-L[b] \rightarrow MMnai[c] + MMasn-L[c] + MMthr-L[b]$                             | 0     | 1000 |  | Mouse secretion to outlet (body fluids) |
| MMASNa4b       | $MMnai[b] + MMasn-L[b] \rightarrow MMnai[c] + MMasn-L[c]$                                                       | 0     | 1000 |  | Mouse secretion to outlet (body fluids) |
| MMBTNU3b       | $MMb2a[c] + MMarg[c] + 2 MMnai[b] + MMbndq[b] \rightarrow MMbndq[c] + MMb[c] + MMd[c] + 2 MMnai[c] + MMbndq[c]$ | 0     | 1000 |  | Mouse secretion to outlet (body fluids) |
| MMC'A7ab       | $MMca2[c] + 2 MMnai[b] \leftrightarrow 2 MMnai[c] + MMca2[b]$                                                   | -1000 | 1000 |  | Mouse secretion to outlet (body fluids) |
| MMCHOLAT52b    | $2 MMnai[b] + MMcholab[b] \rightarrow 2 MMnai[c] + MMcholac[c]$                                                 | 0     | 1000 |  | Mouse secretion to outlet (body fluids) |
| MMCHOL4b       | $MMcholab[b] + MMnai[b] \leftrightarrow MMnai[c] + MMcholac[c]$                                                 | -1000 | 1000 |  | Mouse secretion to outlet (body fluids) |
| MMCTH_2b       | $2 MMnai[b] + MMcab[b] \leftrightarrow 2 MMnai[c] + MMcab[c]$                                                   | -1000 | 1000 |  | Mouse secretion to outlet (body fluids) |
| MMCTH_4b       | $4 MMnai[b] + MMcab[b] \leftrightarrow 4 MMnai[c] + MMcab[c]$                                                   | -1000 | 1000 |  | Mouse secretion to outlet (body fluids) |
| MMCREAT4_2_ab  | $2 MMnai[b] + MMcreab[b] \leftrightarrow 2 MMnai[c] + MMcreac[c]$                                               | -1000 | 1000 |  | Mouse secretion to outlet (body fluids) |
| MMCRNaNaFab    | $MMnai[b] + MMcrab[b] \rightarrow MMnai[c] + MMcrac[c]$                                                         | 0     | 1000 |  | Mouse secretion to outlet (body fluids) |
| MMCYALANaFab   | $MMab-L[c] + MMnai[b] + MMcys-L[b] \rightarrow MMnai[c] + MMcys-L[c] + MMab-L[b]$                               | 0     | 1000 |  | Mouse secretion to outlet (body fluids) |
| MMCYASNNaFab   | $MMasn-L[c] + MMnai[b] + MMcys-L[b] \rightarrow MMnai[c] + MMcys-L[c] + MMasn-L[b]$                             | 0     | 1000 |  | Mouse secretion to outlet (body fluids) |
| MMCYSLNNaFab   | $MMgho-L[c] + MMnai[b] + MMcys-L[b] \rightarrow MMnai[c] + MMcys-L[c] + MMgho-L[b]$                             | 0     | 1000 |  | Mouse secretion to outlet (body fluids) |
| MMCYSERNaFab   | $MMser-L[c] + MMnai[b] + MMcys-L[b] \rightarrow MMnai[c] + MMcys-L[c] + MMser-L[b]$                             | 0     | 1000 |  | Mouse secretion to outlet (body fluids) |
| MMCYSTRNaFab   | $MMthr-L[c] + MMnai[b] + MMcys-L[b] \rightarrow MMnai[c] + MMcys-L[c] + MMthr-L[b]$                             | 0     | 1000 |  | Mouse secretion to outlet (body fluids) |
| MMCY5ab        | $MMnai[b] + MMcys-L[b] \rightarrow MMnai[c] + MMcys-L[c]$                                                       | 0     | 1000 |  | Mouse secretion to outlet (body fluids) |
| MMCYTD4b       | $MMnai[b] + MMcysd[b] \rightarrow MMnai[c] + MMcysd[c]$                                                         | 0     | 1000 |  | Mouse secretion to outlet (body fluids) |
| MMCYTD6b       | $2 MMnai[b] + MMcysd[b] \rightarrow 2 MMnai[c] + MMcysd[c]$                                                     | 0     | 1000 |  | Mouse secretion to outlet (body fluids) |
| MMDOP4_2_ab    | $2 MMnai[b] + MMdopab[b] \leftrightarrow 2 MMnai[c] + MMdopac[c]$                                               | -1000 | 1000 |  | Mouse secretion to outlet (body fluids) |
| MMESTRONE52b   | $2 MMnai[b] + MMestroneab[b] \rightarrow 2 MMnai[c] + MMestroneac[c]$                                           | 0     | 1000 |  | Mouse secretion to outlet (body fluids) |
| MMEX_nu1e9b    | $MMnai[b] \leftrightarrow$                                                                                      | -100  | 1000 |  | Mouse secretion to outlet (body fluids) |

|                |                                                                                                              |       |      |  |                                         |
|----------------|--------------------------------------------------------------------------------------------------------------|-------|------|--|-----------------------------------------|
| MMFATP1b       | $MMnu[c] + MMbda[c] \Leftrightarrow MMnu[b] + MMbda[b]$                                                      | -1000 | 1000 |  | Mouse secretion to outlet (body fluids) |
| MMFATP2b       | $MMnu[c] + MMocda[c] \Leftrightarrow MMnu[b] + MMocda[b]$                                                    | -1000 | 1000 |  | Mouse secretion to outlet (body fluids) |
| MMFATP3b       | $MMnu[c] + MMocda[c] \Leftrightarrow MMnu[b] + MMocda[b]$                                                    | -1000 | 1000 |  | Mouse secretion to outlet (body fluids) |
| MMFATP4b       | $MMnu[c] + MMara[c] \Leftrightarrow MMnu[b] + MMara[b]$                                                      | -1000 | 1000 |  | Mouse secretion to outlet (body fluids) |
| MMFATP5b       | $MMnu[c] + MMarad[c] \Leftrightarrow MMnu[b] + MMarad[b]$                                                    | -1000 | 1000 |  | Mouse secretion to outlet (body fluids) |
| MMFATP6b       | $MMnu[c] + MMadr[c] \Leftrightarrow MMnu[b] + MMadr[b]$                                                      | -1000 | 1000 |  | Mouse secretion to outlet (body fluids) |
| MMFATP7b       | $MMnu[c] + MMerv[c] \Leftrightarrow MMnu[b] + MMerv[b]$                                                      | -1000 | 1000 |  | Mouse secretion to outlet (body fluids) |
| MMFATP8b       | $MMnu[c] + MMgpc[c] \Leftrightarrow MMnu[b] + MMgpc[b]$                                                      | -1000 | 1000 |  | Mouse secretion to outlet (body fluids) |
| MMFATP9b       | $MMnu[c] + MMiruc[c] \Leftrightarrow MMnu[b] + MMiruc[b]$                                                    | -1000 | 1000 |  | Mouse secretion to outlet (body fluids) |
| MMFRU4b        | $MMnu[b] + MMfru[b] \Leftrightarrow MMnu[c] + MMfru[c]$                                                      | -1000 | 1000 |  | Mouse secretion to outlet (body fluids) |
| MMGLA4b        | $MMnu[b] + MMgub[b] \Leftrightarrow MMnu[c] + MMguc[c]$                                                      | -1000 | 1000 |  | Mouse secretion to outlet (body fluids) |
| MMGLA4_2b      | $2 MMnu[b] + MMgub[b] \Leftrightarrow 2 MMnu[c] + MMguc[c]$                                                  | -1000 | 1000 |  | Mouse secretion to outlet (body fluids) |
| MMGCHOLAc2b    | $2 MMnu[b] + MMgchob[b] \rightarrow 2 MMnu[c] + MMgchoc[c]$                                                  | 0     | 1000 |  | Mouse secretion to outlet (body fluids) |
| MMGLC4b        | $MMnu[b] + MMgk-D[b] \Leftrightarrow MMnu[c] + MMgk-D[c]$                                                    | -1000 | 1000 |  | Mouse secretion to outlet (body fluids) |
| MMGLC4_2b      | $2 MMnu[b] + MMgk-D[b] \Leftrightarrow 2 MMnu[c] + MMgk-D[c]$                                                | -1000 | 1000 |  | Mouse secretion to outlet (body fluids) |
| MMGLNALANa4b   | $MMhu-L[c] + MMnu[b] + MMgh-L[b] \rightarrow MMnu[c] + MMgh-L[c] + MMhu-L[b]$                                | 0     | 1000 |  | Mouse secretion to outlet (body fluids) |
| MMGLNASNNa4b   | $MMhu-L[c] + MMnu[b] + MMgh-L[b] \rightarrow MMnu[c] + MMgh-L[c] + MMhu-L[b]$                                | 0     | 1000 |  | Mouse secretion to outlet (body fluids) |
| MMGLNCYSNa4b   | $MMcys-L[c] + MMnu[b] + MMgh-L[b] \rightarrow MMnu[c] + MMgh-L[c] + MMcys-L[b]$                              | 0     | 1000 |  | Mouse secretion to outlet (body fluids) |
| MMGLNSEbNa4b   | $MMser-L[c] + MMnu[b] + MMgh-L[b] \rightarrow MMnu[c] + MMgh-L[c] + MMser-L[b]$                              | 0     | 1000 |  | Mouse secretion to outlet (body fluids) |
| MMGLNTHNa4b    | $MMthr-L[c] + MMnu[b] + MMgh-L[b] \rightarrow MMnu[c] + MMgh-L[c] + MMthr-L[b]$                              | 0     | 1000 |  | Mouse secretion to outlet (body fluids) |
| MMGLN4b        | $MMnu[b] + MMgh-L[b] \rightarrow MMnu[c] + MMgh-L[c]$                                                        | 0     | 1000 |  | Mouse secretion to outlet (body fluids) |
| MMGLYLAT4b     | $MMarg-L[c] + MMnu[b] + MMgh-L[b] \rightarrow MMnu[c] + MMgh-L[c] + MMarg-L[b]$                              | 0     | 1000 |  | Mouse secretion to outlet (body fluids) |
| MMGLYB4_2_4b   | $2 MMnu[b] + MMghyb[b] \Leftrightarrow 2 MMnu[c] + MMghyb[c]$                                                | -1000 | 1000 |  | Mouse secretion to outlet (body fluids) |
| MMGLY4b        | $MMnu[b] + MMgh[b] \rightarrow MMnu[c] + MMgh[c]$                                                            | 0     | 1000 |  | Mouse secretion to outlet (body fluids) |
| MMGLY7_211_4b  | $2 MMnu[b] + MMgh[b] + MMa[b] \Leftrightarrow 2 MMnu[c] + MMa[c] + MMgh[c]$                                  | -1000 | 1000 |  | Mouse secretion to outlet (body fluids) |
| MMGLY7_311_4b  | $3 MMnu[b] + MMgh[b] + MMa[b] \Leftrightarrow 3 MMnu[c] + MMa[c] + MMgh[c]$                                  | -1000 | 1000 |  | Mouse secretion to outlet (body fluids) |
| MMGSNa4b       | $MMnu[b] + MMgsa[b] \rightarrow MMnu[c] + MMgsa[c]$                                                          | 0     | 1000 |  | Mouse secretion to outlet (body fluids) |
| MMGSNa5b       | $2 MMnu[b] + MMgsa[b] \rightarrow 2 MMnu[c] + MMgsa[c]$                                                      | 0     | 1000 |  | Mouse secretion to outlet (body fluids) |
| MMHS4b         | $MMnu[b] + MMhu-L[b] \rightarrow MMnu[c] + MMhu-L[c]$                                                        | 0     | 1000 |  | Mouse secretion to outlet (body fluids) |
| MMHSYLAT4b     | $MMarg-L[c] + MMnu[b] + MMthr-L[b] \rightarrow MMnu[c] + MMthr-L[c] + MMarg-L[b]$                            | 0     | 1000 |  | Mouse secretion to outlet (body fluids) |
| MMHOM4b        | $MMnu[b] + MMhom-L[b] \rightarrow MMnu[c] + MMhom-L[c]$                                                      | 0     | 1000 |  | Mouse secretion to outlet (body fluids) |
| MMLE4b         | $MMnu[b] + MMle-L[b] \rightarrow MMnu[c] + MMle-L[c]$                                                        | 0     | 1000 |  | Mouse secretion to outlet (body fluids) |
| MMINST4b       | $MMnu[b] + MMnos[b] \Leftrightarrow MMnu[c] + MMnos[c]$                                                      | -1000 | 1000 |  | Mouse secretion to outlet (body fluids) |
| MMNST4_2b      | $2 MMnu[b] + MMnos[b] \Leftrightarrow 2 MMnu[c] + MMnos[c]$                                                  | -1000 | 1000 |  | Mouse secretion to outlet (body fluids) |
| MMNS4b         | $MMnu[b] + MMnu[b] \rightarrow MMnu[c] + MMnu[c]$                                                            | 0     | 1000 |  | Mouse secretion to outlet (body fluids) |
| MMNS5b         | $MMnu[b] + 2 MMnu[b] \rightarrow 2 MMnu[c] + MMnu[c]$                                                        | 0     | 1000 |  | Mouse secretion to outlet (body fluids) |
| MMLEU4b        | $MMnu[b] + MMheu-L[b] \rightarrow MMnu[c] + MMheu-L[c]$                                                      | 0     | 1000 |  | Mouse secretion to outlet (body fluids) |
| MMLEYLAT4b     | $MMarg-L[c] + MMnu[b] + MMheu-L[b] \rightarrow MMnu[c] + MMheu-L[c] + MMarg-L[b]$                            | 0     | 1000 |  | Mouse secretion to outlet (body fluids) |
| MMLIPO4b       | $MMb2a[c] + MMarg[c] + 2 MMnu[b] + MMgpc[b] \rightarrow MMgpc[c] + MMb[c] + MMp[c] + 2 MMnu[c] + MMgpc[c]$   | 0     | 1000 |  | Mouse secretion to outlet (body fluids) |
| MMLY4b         | $MMnu[b] + MMly-L[b] \rightarrow MMnu[c] + MMly-L[c]$                                                        | 0     | 1000 |  | Mouse secretion to outlet (body fluids) |
| MMMLAC4b       | $MMnu[b] + MMlac-L[b] \rightarrow MMnu[c] + MMlac-L[c]$                                                      | -1000 | 1000 |  | Mouse secretion to outlet (body fluids) |
| MMMAN4b        | $MMnu[b] + MMman[b] \Leftrightarrow MMnu[c] + MMman[c]$                                                      | -1000 | 1000 |  | Mouse secretion to outlet (body fluids) |
| MMME4b         | $MMnu[b] + MMme-L[b] \rightarrow MMnu[c] + MMme-L[c]$                                                        | 0     | 1000 |  | Mouse secretion to outlet (body fluids) |
| MMMETYLAT4b    | $MMarg-L[c] + MMnu[b] + MMme-L[b] \rightarrow MMnu[c] + MMme-L[c] + MMarg-L[b]$                              | 0     | 1000 |  | Mouse secretion to outlet (body fluids) |
| MMNA4b         | $2 MMnu[b] + MMib[b] \Leftrightarrow 2 MMnu[c] + MMib[c]$                                                    | -1000 | 1000 |  | Mouse secretion to outlet (body fluids) |
| MMNA5b         | $MMnu[b] \Leftrightarrow MMnu[c]$                                                                            | -1000 | 1000 |  | Mouse secretion to outlet (body fluids) |
| MMNA5b         | $MMnu[c] + MMab4[b] \Leftrightarrow MMab4[c] + MMnu[b]$                                                      | -1000 | 1000 |  | Mouse secretion to outlet (body fluids) |
| MMNCC4b        | $MMnu[b] + MMc4[b] \rightarrow MMnu[c] + MMc4[c]$                                                            | 0     | 1000 |  | Mouse secretion to outlet (body fluids) |
| MMNCK4b        | $4 MMnu[c] + MMk[b] + MMa2[b] \Leftrightarrow MMk[c] + MMa2[c] + 4 MMnu[b]$                                  | -1000 | 1000 |  | Mouse secretion to outlet (body fluids) |
| MMNCNa4b       | $4 MMnu[c] + MMab4[b] + MMa2[b] \Leftrightarrow MMab4[c] + MMa2[c] + 4 MMnu[b]$                              | -1000 | 1000 |  | Mouse secretion to outlet (body fluids) |
| MMNVKCC2b      | $MMab4[b] + MMnu[b] + 2 MMk4[b] \Leftrightarrow MMab4[c] + MMnu[c] + 2 MMk4[c]$                              | -1000 | 1000 |  | Mouse secretion to outlet (body fluids) |
| MMNKKCC4b      | $MMnu[b] + MMk4[b] + 2 MMk4[b] \Leftrightarrow MMnu[c] + 2 MMk4[c] + MMk4[c]$                                | -1000 | 1000 |  | Mouse secretion to outlet (body fluids) |
| MMNRPPIR4_2_4b | $2 MMnu[b] + MMargp4[b] \Leftrightarrow 2 MMnu[c] + MMargp4[c]$                                              | -1000 | 1000 |  | Mouse secretion to outlet (body fluids) |
| MMPH4b         | $MMnu[b] + MMph-L[b] \rightarrow MMnu[c] + MMph-L[c]$                                                        | 0     | 1000 |  | Mouse secretion to outlet (body fluids) |
| MMPHYLAT4b     | $MMarg-L[c] + MMnu[b] + MMph-L[b] \rightarrow MMnu[c] + MMph-L[c] + MMarg-L[b]$                              | 0     | 1000 |  | Mouse secretion to outlet (body fluids) |
| MMPI7b         | $3 MMnu[b] + MMp4[b] \Leftrightarrow MMp4[c] + 3 MMnu[c]$                                                    | -1000 | 1000 |  | Mouse secretion to outlet (body fluids) |
| MMPI8b         | $1.5 MMnu[b] + MMp4[b] \Leftrightarrow MMp4[c] + 1.5 MMnu[c]$                                                | -1000 | 1000 |  | Mouse secretion to outlet (body fluids) |
| MMPI9b         | $2 MMnu[b] + MMp4[b] \Leftrightarrow MMp4[c] + 2 MMnu[c]$                                                    | -1000 | 1000 |  | Mouse secretion to outlet (body fluids) |
| MMPTXO4b       | $MMb2a[c] + MMarg[c] + 2 MMnu[b] + MMpro-R[b] \rightarrow MMgpc[c] + MMb[c] + MMp[c] + 2 MMnu[c] + MMgpc[c]$ | 0     | 1000 |  | Mouse secretion to outlet (body fluids) |
| MMPRO4b        | $MMnu[b] + MMpro-L[b] \rightarrow MMnu[c] + MMpro-L[c]$                                                      | 0     | 1000 |  | Mouse secretion to outlet (body fluids) |
| MMPRO42b       | $2 MMnu[b] + MMpro-L[b] \Leftrightarrow 2 MMnu[c] + MMpro-L[c]$                                              | -1000 | 1000 |  | Mouse secretion to outlet (body fluids) |
| MMSEL4_3b      | $3 MMnu[b] + MMselb[b] \Leftrightarrow 3 MMnu[c] + MMselc[c]$                                                | -1000 | 1000 |  | Mouse secretion to outlet (body fluids) |
| MMSEALANa4b    | $MMhu-L[c] + MMnu[b] + MMser-L[b] \rightarrow MMnu[c] + MMser-L[c] + MMhu-L[b]$                              | 0     | 1000 |  | Mouse secretion to outlet (body fluids) |
| MMSEASNNa4b    | $MMhu-L[c] + MMnu[b] + MMser-L[b] \rightarrow MMnu[c] + MMser-L[c] + MMhu-L[b]$                              | 0     | 1000 |  | Mouse secretion to outlet (body fluids) |
| MMSECYSSNa4b   | $MMcys-L[c] + MMnu[b] + MMser-L[b] \rightarrow MMnu[c] + MMser-L[c] + MMcys-L[b]$                            | 0     | 1000 |  | Mouse secretion to outlet (body fluids) |
| MMSEGLNNa4b    | $MMgh-L[c] + MMnu[b] + MMser-L[b] \rightarrow MMnu[c] + MMser-L[c] + MMgh-L[b]$                              | 0     | 1000 |  | Mouse secretion to outlet (body fluids) |
| MMSELYSSNa4b   | $MMlys-L[c] + MMnu[b] + MMser-L[b] \rightarrow MMnu[c] + MMser-L[c] + MMlys-L[b]$                            | 0     | 1000 |  | Mouse secretion to outlet (body fluids) |
| MMSETRbNa4b    | $MMthr-L[c] + MMnu[b] + MMser-L[b] \rightarrow MMnu[c] + MMser-L[c] + MMthr-L[b]$                            | 0     | 1000 |  | Mouse secretion to outlet (body fluids) |
| MMSEb4b        | $MMnu[b] + MMser-L[b] \rightarrow MMnu[c] + MMser-L[c]$                                                      | 0     | 1000 |  | Mouse secretion to outlet (body fluids) |
| MMSO44_2b      | $2 MMnu[b] + MMso4b[b] \Leftrightarrow 2 MMnu[c] + MMso4c[c]$                                                | -1000 | 1000 |  | Mouse secretion to outlet (body fluids) |
| MMSO44_3b      | $3 MMnu[b] + MMso4b[b] \Leftrightarrow 3 MMnu[c] + MMso4c[c]$                                                | -1000 | 1000 |  | Mouse secretion to outlet (body fluids) |
| MMSRTN6_2_4b   | $2 MMk4[c] + 2 MMnu[b] + MMern4[b] \Leftrightarrow 2 MMnu[c] + MMern4[c] + MMern4[c] + 2 MMk4[b]$            | -1000 | 1000 |  | Mouse secretion to outlet (body fluids) |
| MMSUCC4_2b     | $2 MMnu[b] + MMsuccb[b] \Leftrightarrow 2 MMnu[c] + MMsuccc[c]$                                              | -1000 | 1000 |  | Mouse secretion to outlet (body fluids) |
| MMSUCC4_3b     | $3 MMnu[b] + MMsuccb[b] \Leftrightarrow 3 MMnu[c] + MMsuccc[c]$                                              | -1000 | 1000 |  | Mouse secretion to outlet (body fluids) |
| MMTAUR4_2_4b   | $2 MMnu[b] + MMtaur[b] \Leftrightarrow 2 MMnu[c] + MMtaur[c]$                                                | -1000 | 1000 |  | Mouse secretion to outlet (body fluids) |
| MMTCHOLAc2b    | $2 MMnu[b] + MMchob[b] \rightarrow 2 MMnu[c] + MMchoc[c]$                                                    | 0     | 1000 |  | Mouse secretion to outlet (body fluids) |
| MMTBM4b        | $MMnu[b] + MMthym4[b] \rightarrow MMnu[c] + MMthym4[c]$                                                      | 0     | 1000 |  | Mouse secretion to outlet (body fluids) |
| MMTBM45b       | $2 MMnu[b] + MMthym4[b] \rightarrow 2 MMnu[c] + MMthym4[c]$                                                  | 0     | 1000 |  | Mouse secretion to outlet (body fluids) |
| MMTIRALANa4b   | $MMhu-L[c] + MMnu[b] + MMthr-L[b] \rightarrow MMnu[c] + MMthr-L[c] + MMhu-L[b]$                              | 0     | 1000 |  | Mouse secretion to outlet (body fluids) |
| MMTIRASNNa4b   | $MMhu-L[c] + MMnu[b] + MMthr-L[b] \rightarrow MMnu[c] + MMthr-L[c] + MMhu-L[b]$                              | 0     | 1000 |  | Mouse secretion to outlet (body fluids) |
| MMTIRCYSSNa4b  | $MMcys-L[c] + MMnu[b] + MMthr-L[b] \rightarrow MMnu[c] + MMthr-L[c] + MMcys-L[b]$                            | 0     | 1000 |  | Mouse secretion to outlet (body fluids) |
| MMTIRGLNNa4b   | $MMgh-L[c] + MMnu[b] + MMthr-L[b] \rightarrow MMnu[c] + MMthr-L[c] + MMgh-L[b]$                              | 0     | 1000 |  | Mouse secretion to outlet (body fluids) |
| MMTIRSEbNa4b   | $MMser-L[c] + MMnu[b] + MMthr-L[b] \rightarrow MMnu[c] + MMthr-L[c] + MMser-L[b]$                            | 0     | 1000 |  | Mouse secretion to outlet (body fluids) |
| MMTHR4b        | $MMnu[b] + MMthr-L[b] \rightarrow MMnu[c] + MMthr-L[c]$                                                      | 0     | 1000 |  | Mouse secretion to outlet (body fluids) |

|                                                       |                                                                                                                                |       |      |  |                                         |
|-------------------------------------------------------|--------------------------------------------------------------------------------------------------------------------------------|-------|------|--|-----------------------------------------|
| MMTRP4b                                               | $MMnu[b] + MMnp-L[b] \rightarrow MMnu[c] + MMnp-L[c]$                                                                          | 0     | 1000 |  | Moose secretion to outlet (body fluids) |
| MMTSL4_3b                                             | $3 MMnu[b] + MMnu[b] \leftrightarrow 3 MMnu[c] + MMnu[c]$                                                                      | -1000 | 1000 |  | Moose secretion to outlet (body fluids) |
| MMTYR4b                                               | $MMnu[b] + MMyr-L[b] \rightarrow MMnu[c] + MMyr-L[c]$                                                                          | 0     | 1000 |  | Moose secretion to outlet (body fluids) |
| MMIR4b                                                | $MMnu[b] + MMir[b] \rightarrow MMnu[c] + MMir[b]$                                                                              | 0     | 1000 |  | Moose secretion to outlet (body fluids) |
| MMIR4b                                                | $2 MMnu[b] + MMir[b] \rightarrow 2 MMnu[c] + MMir[c]$                                                                          | 0     | 1000 |  | Moose secretion to outlet (body fluids) |
| MMVAL4b                                               | $MMnu[b] + MMval-L[b] \rightarrow MMnu[c] + MMval-L[c]$                                                                        | 0     | 1000 |  | Moose secretion to outlet (body fluids) |
| MM2MCTb                                               | $MM2mct[c] \leftrightarrow MM2mct[b]$                                                                                          | -1000 | 1000 |  | Moose secretion to outlet (body fluids) |
| MMEX_2ac4c                                            | $MM2mct[b] \leftrightarrow$                                                                                                    | 0     | 1000 |  | Moose secretion to outlet (body fluids) |
| MM34dHXXPEGb                                          | $MM34dhspeg[c] \leftrightarrow MM34dhspeg[b]$                                                                                  | -1000 | 1000 |  | Moose secretion to outlet (body fluids) |
| MMEX_34dhspeg4c                                       | $MM34dhspeg[b] \leftrightarrow$                                                                                                | 0     | 1000 |  | Moose secretion to outlet (body fluids) |
| MM34ABb                                               | $MM3ab[b] \rightarrow MM3ab[b]$                                                                                                | 0     | 1000 |  | Moose secretion to outlet (body fluids) |
| MMEX_3ab4c                                            | $MM3ab[b] \leftrightarrow$                                                                                                     | 0     | 1000 |  | Moose secretion to outlet (body fluids) |
| MM3MLD4b                                              | $MM3mla[c] \leftrightarrow MM3mla[b]$                                                                                          | -1000 | 1000 |  | Moose secretion to outlet (body fluids) |
| MMEX_3mla4c                                           | $MM3mla[b] \leftrightarrow$                                                                                                    | 0     | 1000 |  | Moose secretion to outlet (body fluids) |
| MM4HEEBRSQUIN4b                                       | $MM4deltrosiquin[b] \leftrightarrow MM4deltrosiquin[c]$                                                                        | -1000 | 1000 |  | Moose secretion to outlet (body fluids) |
| MMEX_4deltrosiquin4c                                  | $MM4deltrosiquin[b] \leftrightarrow$                                                                                           | 0     | 1000 |  | Moose secretion to outlet (body fluids) |
| MM4MPTN4b                                             | $MM4eqm[c] \leftrightarrow MM4eqm[b]$                                                                                          | -1000 | 1000 |  | Moose secretion to outlet (body fluids) |
| MMEX_4eqm4c                                           | $MM4eqm[b] \leftrightarrow$                                                                                                    | 0     | 1000 |  | Moose secretion to outlet (body fluids) |
| MM4MTOLBUTAMID4b                                      | $MM4mubutamide[b] \leftrightarrow MM4mubutamide[c]$                                                                            | -1000 | 1000 |  | Moose secretion to outlet (body fluids) |
| MMEX_4mubutamide4c                                    | $MM4mubutamide[b] \leftrightarrow$                                                                                             | 0     | 1000 |  | Moose secretion to outlet (body fluids) |
| MM4NPISFeb                                            | $MM4qph[b] \leftrightarrow MM4qph[c]$                                                                                          | -1000 | 1000 |  | Moose secretion to outlet (body fluids) |
| MMEX_4qph4c                                           | $MM4qph[b] \leftrightarrow$                                                                                                    | 0     | 1000 |  | Moose secretion to outlet (body fluids) |
| MM4NPI4b                                              | $MM4qph[b] \leftrightarrow MM4qph[c]$                                                                                          | -1000 | 1000 |  | Moose secretion to outlet (body fluids) |
| MMEX_4qph4c                                           | $MM4qph[b] \leftrightarrow$                                                                                                    | 0     | 1000 |  | Moose secretion to outlet (body fluids) |
| MM4PYRDb                                              | $MMb2[c] + MMaq[c] + MM4pyrdb[c] \rightarrow MMaq[c] + MMb[c] + MMq[c] + MM4pyrdb[b]$                                          | 0     | 1000 |  | Moose secretion to outlet (body fluids) |
| MMEX_4pyrdb4c                                         | $MM4pyrdb[b] \leftrightarrow$                                                                                                  | 0     | 1000 |  | Moose secretion to outlet (body fluids) |
| MM5ADTSTERONEGL4b                                     | $MMb2[c] + MMaq[c] + MMSadsteronegl[c] \rightarrow MMaq[c] + MMb[c] + MMq[c] + MMSadsteronegl[b]$                              | 0     | 1000 |  | Moose secretion to outlet (body fluids) |
| MMEX_5adsteronegl4c                                   | $MM5adsteronegl[b] \leftrightarrow$                                                                                            | 0     | 1000 |  | Moose secretion to outlet (body fluids) |
| MM5ADTSTERONE5b                                       | $MM5adsterone[c] \leftrightarrow MM5adsterone[b]$                                                                              | -1000 | 1000 |  | Moose secretion to outlet (body fluids) |
| MMEX_5adsterone5c                                     | $MM5adsterone[b] \leftrightarrow$                                                                                              | 0     | 1000 |  | Moose secretion to outlet (body fluids) |
| MM5ADTSTERONFeb                                       | $MM5adsterone[b] \leftrightarrow MM5adsterone[c]$                                                                              | -1000 | 1000 |  | Moose secretion to outlet (body fluids) |
| MMEX_5adsterone4c                                     | $MM5adsterone[b] \leftrightarrow$                                                                                              | 0     | 1000 |  | Moose secretion to outlet (body fluids) |
| MM5THFeb                                              | $MMoh[c] + MM5thb[b] \leftrightarrow MM5thb[c] + MMoh[b]$                                                                      | -1000 | 1000 |  | Moose secretion to outlet (body fluids) |
| MMEX_5th4c                                            | $MM5thb[b] \leftrightarrow$                                                                                                    | 0     | 1000 |  | Moose secretion to outlet (body fluids) |
| MM5MTHFeb                                             | $MMoh[c] + MM5thb[b] \leftrightarrow MM5thb[c] + MMoh[b]$                                                                      | -1000 | 1000 |  | Moose secretion to outlet (body fluids) |
| MMCLOfHex2b                                           | $MMoh[c] + 2 MMc[b] \rightarrow 2 MMc[c] + MMoh[b]$                                                                            | 0     | 1000 |  | Moose secretion to outlet (body fluids) |
| MMEX_oh4b                                             | $MMoh[b] \leftrightarrow$                                                                                                      | -100  | 1000 |  | Moose secretion to outlet (body fluids) |
| MMFOL2b                                               | $MMoh[c] + MM64b[b] \leftrightarrow MM64[c] + MMoh[b]$                                                                         | -1000 | 1000 |  | Moose secretion to outlet (body fluids) |
| MMTFFeb                                               | $MMoh[c] + MMthb[b] \leftrightarrow MMthb[c] + MMoh[b]$                                                                        | -1000 | 1000 |  | Moose secretion to outlet (body fluids) |
| MMTHMTP4b                                             | $MMoh[c] + MMthmp[b] \leftrightarrow MMthmp[c] + MMoh[b]$                                                                      | -1000 | 1000 |  | Moose secretion to outlet (body fluids) |
| MMTHMTFeb                                             | $MMthmp[c] + 3 MMoh[b] \rightarrow 3 MMoh[c] + MMthmp[b]$                                                                      | 0     | 1000 |  | Moose secretion to outlet (body fluids) |
| MM5HOMEPRAZOLFeb                                      | $MM5homprazole[b] \leftrightarrow MM5homprazole[c]$                                                                            | -1000 | 1000 |  | Moose secretion to outlet (body fluids) |
| MMEX_5homprazole4c                                    | $MM5homprazole[b] \leftrightarrow$                                                                                             | 0     | 1000 |  | Moose secretion to outlet (body fluids) |
| MM5HTPVESSFeb                                         | $2 MMb2a[c] + 2 MMaq[c] + 3 MM5mp[c] \rightarrow 2 MMaq[c] + 2 MMb[c] + 2 MMq[c] + 3 MM5mp[b]$                                 | 0     | 1000 |  | Moose secretion to outlet (body fluids) |
| MMEX_5mp4c                                            | $MM5mp[b] \leftrightarrow$                                                                                                     | 0     | 1000 |  | Moose secretion to outlet (body fluids) |
| MMEX_5mla4c                                           | $MM5mla[b] \leftrightarrow$                                                                                                    | 0     | 1000 |  | Moose secretion to outlet (body fluids) |
| MMMTHTFeb                                             | $MM5mla[c] \rightarrow MM5mla[b]$                                                                                              | 0     | 1000 |  | Moose secretion to outlet (body fluids) |
| MM6HTSTERONE4b                                        | $MM6ststerone[c] \leftrightarrow MM6ststerone[b]$                                                                              | -1000 | 1000 |  | Moose secretion to outlet (body fluids) |
| MMEX_6ststerone4c                                     | $MM6ststerone[b] \leftrightarrow$                                                                                              | 0     | 1000 |  | Moose secretion to outlet (body fluids) |
| MMABFeb                                               | $MMab[c] \rightarrow MMab[b]$                                                                                                  | 0     | 1000 |  | Moose secretion to outlet (body fluids) |
| MMEX_ah4c                                             | $MMab[b] \leftrightarrow$                                                                                                      | 0     | 1000 |  | Moose secretion to outlet (body fluids) |
| MMEX_4ab4c                                            | $MM4ab[b] \leftrightarrow$                                                                                                     | 0     | 1000 |  | Moose secretion to outlet (body fluids) |
| MMGABAVESSEFeb                                        | $MMb2a[c] + MMaq[c] + 3 MM4ab[c] \rightarrow MMaq[c] + MMb[c] + MMq[c] + 3 MM4ab[b]$                                           | 0     | 1000 |  | Moose secretion to outlet (body fluids) |
| MMEX_aca4c                                            | $MMacab[b] \leftrightarrow$                                                                                                    | 0     | 1000 |  | Moose secretion to outlet (body fluids) |
| MMACALD4b                                             | $MMacal[b] \leftrightarrow MMacal[c]$                                                                                          | -1000 | 1000 |  | Moose secretion to outlet (body fluids) |
| MMEX_acal4c                                           | $MMacal[b] \leftrightarrow$                                                                                                    | 0     | 1000 |  | Moose secretion to outlet (body fluids) |
| MMEX_acetone4c                                        | $MMacetone[b] \leftrightarrow$                                                                                                 | 0     | 1000 |  | Moose secretion to outlet (body fluids) |
| MMACGALFUGGALGALFUC12GA<br>L14ACGGALGALSID4b          | $MMacgallicgallicgallic12gal4acgpgalghide_4b[b] \leftrightarrow$<br>$MMacgallicgallicgallic12gal4acgpgalghide_4a[c]$           | -1000 | 1000 |  | Moose secretion to outlet (body fluids) |
| MMEX_acgallicgallicgallic12gal4acgpgalghide_4a4c      | $MMacgallicgallicgallic12gal4acgpgalghide_4a[b] \leftrightarrow$                                                               | 0     | 1000 |  | Moose secretion to outlet (body fluids) |
| MMACGALFUGGALGALFUCGAL<br>ACGLGAL14ACGLGALGALSID4b    | $MMacgallicgallicgallicgallicgal14acgpgalghide_4a[b] \leftrightarrow$<br>$MMacgallicgallicgallicgallicgal14acgpgalghide_4a[c]$ | -1000 | 1000 |  | Moose secretion to outlet (body fluids) |
| MMEX_acgallicgallicgallicgallicgal14acgpgalghide_4a4c | $MMacgallicgallicgallicgallicgal14acgpgalghide_4a[b] \leftrightarrow$                                                          | 0     | 1000 |  | Moose secretion to outlet (body fluids) |
| MMACGAL4b                                             | $MMacga[c] \rightarrow MMacga[b]$                                                                                              | 0     | 1000 |  | Moose secretion to outlet (body fluids) |
| MMEX_acga4c                                           | $MMacga[b] \leftrightarrow$                                                                                                    | 0     | 1000 |  | Moose secretion to outlet (body fluids) |
| MMACHYVESSEFeb                                        | $2 MMb2a[c] + 2 MMaq[c] + 3 MMac[c] \rightarrow 2 MMaq[c] + 2 MMb[c] + 2 MMq[c] + 3 MMac[b]$                                   | 0     | 1000 |  | Moose secretion to outlet (body fluids) |
| MMEX_ach4c                                            | $MMac[b] \leftrightarrow$                                                                                                      | 0     | 1000 |  | Moose secretion to outlet (body fluids) |
| MMAMPASECG4b                                          | $MMb2a[b] + MMcgb[b] \rightarrow MMgb[b] + MMcys-L[b]$                                                                         | 0     | 1000 |  | Moose secretion to outlet (body fluids) |
| MMAMYFeb                                              | $8 MMb2a[b] + MMmch1[b] \rightarrow 8 MMgk-D[b] + MMmch2[b]$                                                                   | 0     | 1000 |  | Moose secretion to outlet (body fluids) |
| MMAMY2b                                               | $8 MMb2a[b] + MMghg2b[b] \rightarrow 8 MMgk-D[b] + MMghgs1[b]$                                                                 | 0     | 1000 |  | Moose secretion to outlet (body fluids) |
| MMBTNFeb                                              | $MMb2a[b] + MMbacc[b] \rightarrow MMbq[b] + MMbys-L[b]$                                                                        | 0     | 1000 |  | Moose secretion to outlet (body fluids) |
| MMCHTNASFeb                                           | $2 MMb2a[b] + MMmch1[b] \rightarrow 3 MMacgum[b]$                                                                              | 0     | 1000 |  | Moose secretion to outlet (body fluids) |
| MMEX_3a4c                                             | $MMb2a[b] \leftrightarrow$                                                                                                     | 0     | 1000 |  | Moose secretion to outlet (body fluids) |
| MMFUCASE2b                                            | $MMb2a[b] + MMbcs[b] \rightarrow MMbcs-L[b] + MMbcs_deg1[b]$                                                                   | 0     | 1000 |  | Moose secretion to outlet (body fluids) |
| MMFUCASEb                                             | $MMb2a[b] + MM62b2m2m2a[b] \rightarrow MMbcs-L[b] + MM62b2m2m2m2a[b]$                                                          | 0     | 1000 |  | Moose secretion to outlet (body fluids) |
| MMGAMY4b                                              | $MMb2a[b] + MMghgs1[b] \rightarrow MMTyp_gsb[b] + MMmub[b]$                                                                    | 0     | 1000 |  | Moose secretion to outlet (body fluids) |
| MMGGH_10HTF6GL4b                                      | $4 MMb2a[b] + MM10htf6ga[b] \rightarrow 4 MMgk-L[b] + MM10htf6ga[b]$                                                           | 0     | 1000 |  | Moose secretion to outlet (body fluids) |
| MMGGH_10HTF6GL4b                                      | $MMb2a[b] + MM10htf6ga[b] \rightarrow MMgk-L[b] + MM10htf6ga[b]$                                                               | 0     | 1000 |  | Moose secretion to outlet (body fluids) |
| MMGGH_10HTF7GL4b                                      | $MMb2a[b] + MM10htf7ga[b] \rightarrow MMgk-L[b] + MM10htf7ga[b]$                                                               | 0     | 1000 |  | Moose secretion to outlet (body fluids) |
| MMGGH_5DHFeb                                          | $4 MMb2a[b] + MM5dhb[b] \rightarrow 4 MMgk-L[b] + MM5dhb[b]$                                                                   | 0     | 1000 |  | Moose secretion to outlet (body fluids) |
| MMGGH_5THFeb                                          | $4 MMb2a[b] + MM5thb[b] \rightarrow 4 MMgk-L[b] + MM5thb[b]$                                                                   | 0     | 1000 |  | Moose secretion to outlet (body fluids) |
| MMGGH_6DHFeb                                          | $MMb2a[b] + MM6dh[b] \rightarrow MMgk-L[b] + MM5dhb[b]$                                                                        | 0     | 1000 |  | Moose secretion to outlet (body fluids) |
| MMGGH_6THFeb                                          | $MMb2a[b] + MM6thb[b] \rightarrow MMgk-L[b] + MM5thb[b]$                                                                       | 0     | 1000 |  | Moose secretion to outlet (body fluids) |
| MMGGH_7DHFeb                                          | $MMb2a[b] + MM7dhb[b] \rightarrow MMgk-L[b] + MM6dhb[b]$                                                                       | 0     | 1000 |  | Moose secretion to outlet (body fluids) |
| MMGGH_7THFeb                                          | $MMb2a[b] + MM7thb[b] \rightarrow MMgk-L[b] + MM6thb[b]$                                                                       | 0     | 1000 |  | Moose secretion to outlet (body fluids) |

|                                 |                                                                                                                |       |      |  |                                         |
|---------------------------------|----------------------------------------------------------------------------------------------------------------|-------|------|--|-----------------------------------------|
| MMGTIPsh                        | $MMb2s2[b] + 2 MMghs2[b] \Leftrightarrow 2 MMb2s2[b] + MMghs2[b]$                                              | -1000 | 1000 |  | Mouse secretion to outlet (body fluids) |
| MMIDZsh                         | $MMb2s2[b] \Leftrightarrow MMb2s2[c]$                                                                          | -1000 | 1000 |  | Mouse secretion to outlet (body fluids) |
| MMIACZsh                        | $MMb2s2[b] + MMks2[b] \rightarrow MMga2[b] + MMgle-D[b]$                                                       | 0     | 1000 |  | Mouse secretion to outlet (body fluids) |
| MMMALJsh                        | $MMb2s2[b] + MMma2[b] \rightarrow 2 MMgle-D[b]$                                                                | 0     | 1000 |  | Mouse secretion to outlet (body fluids) |
| MMMLTG1sh                       | $MMb2s2[b] + MMma2s2[b] \rightarrow MMgle-D[b] + MMma2s2[b]$                                                   | 0     | 1000 |  | Mouse secretion to outlet (body fluids) |
| MMNTD2sh                        | $MMb2s2[b] + MMang2[b] \rightarrow MMga2[b] + MMma2[b]$                                                        | 0     | 1000 |  | Mouse secretion to outlet (body fluids) |
| MMNTD4sh                        | $MMb2s2[b] + MMang2[b] \rightarrow MMga2[b] + MMcys2[b]$                                                       | 0     | 1000 |  | Mouse secretion to outlet (body fluids) |
| MMNTD7sh                        | $MMb2s2[b] + MMang2[b] \rightarrow MMma2s2[b] + MMga2[b]$                                                      | 0     | 1000 |  | Mouse secretion to outlet (body fluids) |
| MMNTD9sh                        | $MMb2s2[b] + MMang2[b] \rightarrow MMga2[b] + MMgs2[b]$                                                        | 0     | 1000 |  | Mouse secretion to outlet (body fluids) |
| MMO16G1sh                       | $MMb2s2[b] + MMghs2s2[b] \rightarrow MMgle-D[b] + MMghs2s2[b]$                                                 | 0     | 1000 |  | Mouse secretion to outlet (body fluids) |
| MMO16G2sh                       | $MMb2s2[b] + MMach2s2[b] \rightarrow MMgle-D[b] + MMma2s2[b]$                                                  | 0     | 1000 |  | Mouse secretion to outlet (body fluids) |
| MMSUCRsh                        | $MMb2s2[b] + MMacc2[b] \rightarrow MMgle-D[b] + MMma2s2[b]$                                                    | 0     | 1000 |  | Mouse secretion to outlet (body fluids) |
| MMTRE3sh                        | $MMb2s2[b] + MMma2s2[b] \rightarrow 2 MMgle-D[b]$                                                              | 0     | 1000 |  | Mouse secretion to outlet (body fluids) |
| MMUREA2sh                       | $MMb2s2[b] + MMura2[b] \Leftrightarrow MMb2s2[c] + MMura2[c]$                                                  | -1000 | 1000 |  | Mouse secretion to outlet (body fluids) |
| MMEX_ac2sh                      | $MMac2[b] \Leftrightarrow$                                                                                     | 0     | 1000 |  | Mouse secretion to outlet (body fluids) |
| MMCHOLsh                        | $MMchol2[b] \Leftrightarrow MMchol2[c]$                                                                        | -1000 | 1000 |  | Mouse secretion to outlet (body fluids) |
| MMEX_ch2sh                      | $MMcho2[b] \Leftrightarrow$                                                                                    | 0     | 1000 |  | Mouse secretion to outlet (body fluids) |
| MMACN1ACNGALGRSIDsh             | $MMacn13acngalside\_hs[c] \Leftrightarrow MMacn13acngalside\_hs[b]$                                            | -1000 | 1000 |  | Mouse secretion to outlet (body fluids) |
| MMEX_acn13acngalside\_hs2sh     | $MMacn13acngalside\_hs[b] \Leftrightarrow$                                                                     | 0     | 1000 |  | Mouse secretion to outlet (body fluids) |
| MMACN2ACNGALGRSIDsh             | $MMacn23acngalside\_hs[c] \Leftrightarrow MMacn23acngalside\_hs[b]$                                            | -1000 | 1000 |  | Mouse secretion to outlet (body fluids) |
| MMEX_acn23acngalside\_hs2sh     | $MMacn23acngalside\_hs[b] \Leftrightarrow$                                                                     | 0     | 1000 |  | Mouse secretion to outlet (body fluids) |
| MMACNACNGAL14ACGLGALGLUSIDsh    | $MMacnngall4acngalside\_hs[b] \Leftrightarrow$<br>$MMacnngall4acngalside\_hs[c]$                               | -1000 | 1000 |  | Mouse secretion to outlet (body fluids) |
| MMEX_acnngall4acngalside\_hs2sh | $MMacnngall4acngalside\_hs[b] \Leftrightarrow$                                                                 | 0     | 1000 |  | Mouse secretion to outlet (body fluids) |
| MMACNACNGALGRSIDsh              | $MMacnngalside\_hs[c] \Leftrightarrow MMacnngalside\_hs[b]$                                                    | -1000 | 1000 |  | Mouse secretion to outlet (body fluids) |
| MMEX_acnngalside\_hs2sh         | $MMacnngalside\_hs[b] \Leftrightarrow$                                                                         | 0     | 1000 |  | Mouse secretion to outlet (body fluids) |
| MMACNAmsh                       | $MMacnm[c] \rightarrow MMacnm[b]$                                                                              | 0     | 1000 |  | Mouse secretion to outlet (body fluids) |
| MMEX_acnm2sh                    | $MMacnm[b] \Leftrightarrow$                                                                                    | 0     | 1000 |  | Mouse secretion to outlet (body fluids) |
| MMACNACGLGAL14ACGLGALGLSIDsh    | $MMacngalside\_hs[b] \Leftrightarrow$<br>$MMacngalside\_hs[c]$                                                 | -1000 | 1000 |  | Mouse secretion to outlet (body fluids) |
| MMEX_acngalside\_hs2sh          | $MMacngalside\_hs[b] \Leftrightarrow$                                                                          | 0     | 1000 |  | Mouse secretion to outlet (body fluids) |
| MMADINsh                        | $MMadn2[b] \Leftrightarrow MMadn2[c]$                                                                          | -1000 | 1000 |  | Mouse secretion to outlet (body fluids) |
| MMEX_adac2sh                    | $MMad2[b] \Leftrightarrow$                                                                                     | 0     | 1000 |  | Mouse secretion to outlet (body fluids) |
| MMEX_ani2sh                     | $MMan2[b] \Leftrightarrow$                                                                                     | 0     | 1000 |  | Mouse secretion to outlet (body fluids) |
| MMINSh                          | $MMin2[b] \Leftrightarrow MMin2[c]$                                                                            | -1000 | 1000 |  | Mouse secretion to outlet (body fluids) |
| MMEX_ah2sh                      | $MMah2[b] \Leftrightarrow$                                                                                     | 0     | 1000 |  | Mouse secretion to outlet (body fluids) |
| MMKCC2sh                        | $MMab2[b] + MMab2[c] \Leftrightarrow MMab2[c] + MMab2[c]$                                                      | -1000 | 1000 |  | Mouse secretion to outlet (body fluids) |
| MMADRB                          | $MMad2[b] \Leftrightarrow MMad2[c]$                                                                            | -1000 | 1000 |  | Mouse secretion to outlet (body fluids) |
| MMEX_adac2sh                    | $MMad2[b] \Leftrightarrow$                                                                                     | 0     | 1000 |  | Mouse secretion to outlet (body fluids) |
| MMADPRBsh                       | $MMadpr2[b] \rightarrow MMadpr2[c]$                                                                            | 0     | 1000 |  | Mouse secretion to outlet (body fluids) |
| MMEX_adpr2sh                    | $MMadpr2[b] \Leftrightarrow$                                                                                   | 0     | 1000 |  | Mouse secretion to outlet (body fluids) |
| MMADRNPVESSECh                  | $2 MMb2s2[c] + 2 MMang2[c] + 3 MMadn2[c] \rightarrow 2 MMadn2[c] + 2 MMb2[c] + 2 MMadn2[c] + 3 MMadn2[b]$      | 0     | 1000 |  | Mouse secretion to outlet (body fluids) |
| MMEX_adn2sh                     | $MMadn2[b] \Leftrightarrow$                                                                                    | 0     | 1000 |  | Mouse secretion to outlet (body fluids) |
| MMADRNBsh                       | $MMadn2[b] \Leftrightarrow MMadn2[c]$                                                                          | -1000 | 1000 |  | Mouse secretion to outlet (body fluids) |
| MMEX_adn2sh                     | $MMadn2[b] \Leftrightarrow$                                                                                    | 0     | 1000 |  | Mouse secretion to outlet (body fluids) |
| MMALATOXINsh                    | $MMalatoxin2[b] \Leftrightarrow MMalatoxin2[c]$                                                                | -1000 | 1000 |  | Mouse secretion to outlet (body fluids) |
| MMEX_alatoxin2sh                | $MMalatoxin2[b] \Leftrightarrow$                                                                               | 0     | 1000 |  | Mouse secretion to outlet (body fluids) |
| MMAHANDROSTANGLCsh              | $MMb2s2[c] + MMang2[c] + MMahandrostanglc[c] \rightarrow MMadn2[c] + MMb2[c] + MMga2[c] + MMahandrostanglc[b]$ | 0     | 1000 |  | Mouse secretion to outlet (body fluids) |
| MMEX_ahandrostanglc2sh          | $MMahandrostanglc[b] \Leftrightarrow$                                                                          | 0     | 1000 |  | Mouse secretion to outlet (body fluids) |
| MMAK2GLCHOLsh                   | $MMak2glchol\_hs[b] \Leftrightarrow MMak2glchol\_hs[c]$                                                        | -1000 | 1000 |  | Mouse secretion to outlet (body fluids) |
| MMEX_ak2glchol\_hs2sh           | $MMak2glchol\_hs[b] \Leftrightarrow$                                                                           | 0     | 1000 |  | Mouse secretion to outlet (body fluids) |
| MMEX_ak2sh                      | $MMak2[b] \Leftrightarrow$                                                                                     | 0     | 1000 |  | Mouse secretion to outlet (body fluids) |
| MMALAGLYc8sh                    | $MMgls-L[c] + MMals-L[b] \Leftrightarrow MMals-L[c] + MMgls-L[b]$                                              | -1000 | 1000 |  | Mouse secretion to outlet (body fluids) |
| MMALAGLYc8sh                    | $MMgls[c] + MMals-L[b] \Leftrightarrow MMals-L[c] + MMgls[b]$                                                  | -1000 | 1000 |  | Mouse secretion to outlet (body fluids) |
| MMALALILAT2sh                   | $MMfk-L[c] + MMals-L[b] \rightarrow MMals-L[c] + MMfk-L[b]$                                                    | 0     | 1000 |  | Mouse secretion to outlet (body fluids) |
| MMALAPHELAT2sh                  | $MMphe-L[c] + MMals-L[b] \rightarrow MMals-L[c] + MMphe-L[b]$                                                  | 0     | 1000 |  | Mouse secretion to outlet (body fluids) |
| MMEX_als-L2sh                   | $MMals-L[b] \Leftrightarrow$                                                                                   | 0     | 1000 |  | Mouse secretion to outlet (body fluids) |
| MMASNILELAT2sh                  | $MMfk-L[c] + MMasn-L[b] \rightarrow MMasn-L[c] + MMfk-L[b]$                                                    | 0     | 1000 |  | Mouse secretion to outlet (body fluids) |
| MMASNPHELAT2sh                  | $MMphe-L[c] + MMasn-L[b] \rightarrow MMasn-L[c] + MMphe-L[b]$                                                  | 0     | 1000 |  | Mouse secretion to outlet (body fluids) |
| MMEX_asn-L2sh                   | $MMasn-L[b] \Leftrightarrow$                                                                                   | 0     | 1000 |  | Mouse secretion to outlet (body fluids) |
| MMCYSGLYc8sh                    | $MMgls-L[c] + MMcys-L[b] \Leftrightarrow MMcys-L[c] + MMgls-L[b]$                                              | -1000 | 1000 |  | Mouse secretion to outlet (body fluids) |
| MMCYSGLYc8sh                    | $MMcys-L[c] + MMgls[b] \rightarrow MMgls[c] + MMcys-L[b]$                                                      | 0     | 1000 |  | Mouse secretion to outlet (body fluids) |
| MMCYSEILAT2sh                   | $MMfk-L[c] + MMcys-L[b] \rightarrow MMcys-L[c] + MMfk-L[b]$                                                    | 0     | 1000 |  | Mouse secretion to outlet (body fluids) |
| MMCYSPHELAT2sh                  | $MMphe-L[c] + MMcys-L[b] \rightarrow MMcys-L[c] + MMphe-L[b]$                                                  | 0     | 1000 |  | Mouse secretion to outlet (body fluids) |
| MMCYSSuch                       | $MMcys-L[b] \Leftrightarrow MMcys-L[c]$                                                                        | -1000 | 1000 |  | Mouse secretion to outlet (body fluids) |
| MMEX_cys-L2sh                   | $MMcys-L[b] \Leftrightarrow$                                                                                   | 0     | 1000 |  | Mouse secretion to outlet (body fluids) |
| MMALADGLNc8sh                   | $MMgls-L[c] + MMals-D[b] \Leftrightarrow MMals-D[c] + MMgls-L[b]$                                              | -1000 | 1000 |  | Mouse secretion to outlet (body fluids) |
| MMALADGLYc8sh                   | $MMgls[c] + MMals-D[b] \Leftrightarrow MMals-D[c] + MMgls[b]$                                                  | -1000 | 1000 |  | Mouse secretion to outlet (body fluids) |
| MMEX_als-D2sh                   | $MMals-D[b] \Leftrightarrow$                                                                                   | 0     | 1000 |  | Mouse secretion to outlet (body fluids) |
| MMEX_gls-L2sh                   | $MMgls-L[b] \Leftrightarrow$                                                                                   | 0     | 1000 |  | Mouse secretion to outlet (body fluids) |
| MMGLNILELAT2sh                  | $MMfk-L[c] + MMgls-L[b] \rightarrow MMgls-L[c] + MMfk-L[b]$                                                    | 0     | 1000 |  | Mouse secretion to outlet (body fluids) |
| MMGLNPHELAT2sh                  | $MMphe-L[c] + MMgls-L[b] \rightarrow MMgls-L[c] + MMphe-L[b]$                                                  | 0     | 1000 |  | Mouse secretion to outlet (body fluids) |
| MMSERGLNc8sh                    | $MMgls-L[c] + MMser-D[b] \Leftrightarrow MMser-D[c] + MMgls-L[b]$                                              | -1000 | 1000 |  | Mouse secretion to outlet (body fluids) |
| MMSERGLNc8sh                    | $MMgls-L[c] + MMser-L[b] \Leftrightarrow MMser-L[c] + MMgls-L[b]$                                              | -1000 | 1000 |  | Mouse secretion to outlet (body fluids) |
| MMTHRGLNc8sh                    | $MMgls-L[c] + MMthr-L[b] \Leftrightarrow MMthr-L[c] + MMgls-L[b]$                                              | -1000 | 1000 |  | Mouse secretion to outlet (body fluids) |
| MMEX_glys2sh                    | $MMgls[b] \Leftrightarrow$                                                                                     | 0     | 1000 |  | Mouse secretion to outlet (body fluids) |
| MMGLYVESSECh                    | $MMb2s2[c] + MMang2[c] + 3 MMgls[c] \rightarrow MMadn2[c] + MMb2[c] + MMgls[c] + 3 MMgls[b]$                   | 0     | 1000 |  | Mouse secretion to outlet (body fluids) |
| MMSERGLYc8sh                    | $MMgls[c] + MMser-D[b] \Leftrightarrow MMser-D[c] + MMgls[b]$                                                  | -1000 | 1000 |  | Mouse secretion to outlet (body fluids) |
| MMSERGLYc8sh                    | $MMgls[c] + MMser-L[b] \Leftrightarrow MMser-L[c] + MMgls[b]$                                                  | -1000 | 1000 |  | Mouse secretion to outlet (body fluids) |
| MMTHRGLYc8sh                    | $MMgls[c] + MMthr-L[b] \Leftrightarrow MMthr-L[c] + MMgls[b]$                                                  | -1000 | 1000 |  | Mouse secretion to outlet (body fluids) |
| MMEX_als-L2sh                   | $MMals-L[b] \Leftrightarrow$                                                                                   | 0     | 1000 |  | Mouse secretion to outlet (body fluids) |
| MMHSEILAT2sh                    | $MMfk-L[c] + MMhis-L[b] \rightarrow MMhis-L[c] + MMfk-L[b]$                                                    | 0     | 1000 |  | Mouse secretion to outlet (body fluids) |
| MMILELAT2sh                     | $2 MMma2s2[c] + MMma2s2[c] + MMfk-L[b] \rightarrow 2 MMma2s2[c] + MMfk-L[c] + MMma2s2[c]$                      | 0     | 1000 |  | Mouse secretion to outlet (body fluids) |
| MMILPHELAT2sh                   | $MMphe-L[c] + MMfk-L[b] \rightarrow MMfk-L[c] + MMphe-L[b]$                                                    | 0     | 1000 |  | Mouse secretion to outlet (body fluids) |
| MMILEsh                         | $MMfk-L[b] \Leftrightarrow MMfk-L[c]$                                                                          | -1000 | 1000 |  | Mouse secretion to outlet (body fluids) |
| MMILEULELAT2sh                  | $MMfk-L[c] + MMfk-L[b] \Leftrightarrow MMfk-L[c] + MMfk-L[b]$                                                  | -1000 | 1000 |  | Mouse secretion to outlet (body fluids) |

|                    |                                                                                                  |       |      |  |                                         |
|--------------------|--------------------------------------------------------------------------------------------------|-------|------|--|-----------------------------------------|
| MMMETILELAT2cb     | $MMtk-L[c] + MMter-L[b] \rightarrow MMter-L[c] + MMtk-L[b]$                                      | 0     | 1000 |  | Mouse secretion to outlet (body fluids) |
| MMFHELELAT2cb      | $MDtk-L[c] + MDpht-L[b] \Leftrightarrow MDpht-L[c] + MDtk-L[b]$                                  | -1000 | 1000 |  | Mouse secretion to outlet (body fluids) |
| MMSELELELAT2cb     | $MMtk-L[c] + MMter-L[b] \rightarrow MMter-L[c] + MMtk-L[b]$                                      | 0     | 1000 |  | Mouse secretion to outlet (body fluids) |
| MMTHRELELAT2cb     | $MMtk-L[c] + MMtk-L[b] \rightarrow MMtk-L[c] + MMtk-L[b]$                                        | 0     | 1000 |  | Mouse secretion to outlet (body fluids) |
| MMTRPELELAT2cb     | $MMtk-L[c] + MMmp-L[b] \rightarrow MMmp-L[c] + MMtk-L[b]$                                        | 0     | 1000 |  | Mouse secretion to outlet (body fluids) |
| MMTYRELELAT2cb     | $MMtk-L[c] + MDty-L[b] \rightarrow MDty-L[c] + MMtk-L[b]$                                        | 0     | 1000 |  | Mouse secretion to outlet (body fluids) |
| MMVALLELELAT2cb    | $MMtk-L[c] + MMval-L[b] \rightarrow MMval-L[c] + MMtk-L[b]$                                      | 0     | 1000 |  | Mouse secretion to outlet (body fluids) |
| MMEX_pht-L(e)b     | $MMpht-L[b] \Leftrightarrow$                                                                     | 0     | 1000 |  | Mouse secretion to outlet (body fluids) |
| MMHSPHELAT2cb      | $MDpht-L[c] + MDtk-L[b] \rightarrow MDtk-L[c] + MDpht-L[b]$                                      | 0     | 1000 |  | Mouse secretion to outlet (body fluids) |
| MMLEUPHELAT2cb     | $MDpht-L[c] + MMter-L[b] \Leftrightarrow MMter-L[c] + MDpht-L[b]$                                | -1000 | 1000 |  | Mouse secretion to outlet (body fluids) |
| MMMEPHELAT2cb      | $MDpht-L[c] + MMter-L[b] \rightarrow MMter-L[c] + MDpht-L[b]$                                    | 0     | 1000 |  | Mouse secretion to outlet (body fluids) |
| MMSEPHELAT2cb      | $MDpht-L[c] + MMter-L[b] \rightarrow MMter-L[c] + MDpht-L[b]$                                    | 0     | 1000 |  | Mouse secretion to outlet (body fluids) |
| MMTHRPHELAT2cb     | $MDpht-L[c] + MMtk-L[b] \rightarrow MMtk-L[c] + MDpht-L[b]$                                      | 0     | 1000 |  | Mouse secretion to outlet (body fluids) |
| MMTRPHELAT1cb      | $MDpht-L[c] + MMmp-L[b] \rightarrow MMmp-L[c] + MDpht-L[b]$                                      | 0     | 1000 |  | Mouse secretion to outlet (body fluids) |
| MMTYRPELAT2cb      | $MDpht-L[c] + MDty-L[b] \rightarrow MDty-L[c] + MDpht-L[b]$                                      | 0     | 1000 |  | Mouse secretion to outlet (body fluids) |
| MMVALPHELAT2cb     | $MDpht-L[c] + MMval-L[b] \rightarrow MMval-L[c] + MDpht-L[b]$                                    | 0     | 1000 |  | Mouse secretion to outlet (body fluids) |
| MMCYSISEResb       | $MMter-L[c] + MMLcystin[b] \rightarrow MMLcystin[c] + MMter-L[b]$                                | 0     | 1000 |  | Mouse secretion to outlet (body fluids) |
| MMEX_ser-L(e)b     | $MMter-L[b] \Leftrightarrow$                                                                     | 0     | 1000 |  | Mouse secretion to outlet (body fluids) |
| MMEX_thr-L(e)b     | $MMtk-L[b] \Leftrightarrow$                                                                      | 0     | 1000 |  | Mouse secretion to outlet (body fluids) |
| MMARGLYScb         | $MDty-L[c] + MDarg-L[b] \rightarrow MDarg-L[c] + MDty-L[b]$                                      | 0     | 1000 |  | Mouse secretion to outlet (body fluids) |
| MMARGScb           | $MMarg-L[b] \Leftrightarrow MMarg-L[c]$                                                          | -1000 | 1000 |  | Mouse secretion to outlet (body fluids) |
| MMEX_arg-L(e)b     | $MMarg-L[b] \Leftrightarrow$                                                                     | 0     | 1000 |  | Mouse secretion to outlet (body fluids) |
| MMALISTRNcb        | $MMakom[c] \Leftrightarrow MMakom[b]$                                                            | -1000 | 1000 |  | Mouse secretion to outlet (body fluids) |
| MMEX_alakomcb      | $MMakom[b] \Leftrightarrow$                                                                      | 0     | 1000 |  | Mouse secretion to outlet (body fluids) |
| MMEX_gly(e)b       | $MMgly[b] \Leftrightarrow$                                                                       | 0     | 1000 |  | Mouse secretion to outlet (body fluids) |
| MMGTMLTcb          | $MMtk-L[c] + MMghal[c] \rightarrow MMghal[b] + MMghal[c]$                                        | 0     | 1000 |  | Mouse secretion to outlet (body fluids) |
| MMEX_mrch(e)b      | $MMmrch[b] \Leftrightarrow$                                                                      | 0     | 1000 |  | Mouse secretion to outlet (body fluids) |
| MMEX_gk(e)b        | $MMgk-D[b] \Leftrightarrow$                                                                      | 0     | 1000 |  | Mouse secretion to outlet (body fluids) |
| MMGLCMcb           | $MMgk-D[c] \rightarrow MMgk-D[b]$                                                                | 0     | 1000 |  | Mouse secretion to outlet (body fluids) |
| MMEX_mrch2(e)b     | $MMmrch2[b] \Leftrightarrow$                                                                     | 0     | 1000 |  | Mouse secretion to outlet (body fluids) |
| MMEX_gly2(e)b      | $MMgly2[b] \Leftrightarrow$                                                                      | 0     | 1000 |  | Mouse secretion to outlet (body fluids) |
| MMEX_gly2(e)b      | $MMgly2[b] \Leftrightarrow$                                                                      | 0     | 1000 |  | Mouse secretion to outlet (body fluids) |
| MMANDRSTRNGLCeb    | $MMtk2[c] + MMarg[c] + MMandrang[c] \rightarrow MMadr[c] + MMtk[c] + MMgk[c] + MMandrang[b]$     | 0     | 1000 |  | Mouse secretion to outlet (body fluids) |
| MMEX_andrang(e)b   | $MMandrang[b] \Leftrightarrow$                                                                   | 0     | 1000 |  | Mouse secretion to outlet (body fluids) |
| MMANDRSTRNcb       | $MMandrang[b] \Leftrightarrow MMandrang[c]$                                                      | -1000 | 1000 |  | Mouse secretion to outlet (body fluids) |
| MMEX_andrang(e)b   | $MMandrang[b] \Leftrightarrow$                                                                   | 0     | 1000 |  | Mouse secretion to outlet (body fluids) |
| MMANTYPYRENcb      | $MMantiprene[b] \Leftrightarrow MMantiprene[c]$                                                  | -1000 | 1000 |  | Mouse secretion to outlet (body fluids) |
| MMEX_antiprene(e)b | $MMantiprene[b] \Leftrightarrow$                                                                 | 0     | 1000 |  | Mouse secretion to outlet (body fluids) |
| MMAPPNNQcb         | $MDapnm[c] \Leftrightarrow MDapnm[b]$                                                            | -1000 | 1000 |  | Mouse secretion to outlet (body fluids) |
| MMEX_apnm(e)b      | $MDapnm[b] \Leftrightarrow$                                                                      | 0     | 1000 |  | Mouse secretion to outlet (body fluids) |
| MMAPPNNcb          | $MDapnm[b] \Leftrightarrow MDapnm[c]$                                                            | -1000 | 1000 |  | Mouse secretion to outlet (body fluids) |
| MMEX_apnm(e)b      | $MDapnm[b] \Leftrightarrow$                                                                      | 0     | 1000 |  | Mouse secretion to outlet (body fluids) |
| MMAPWGSTRNcb       | $MDapngm[b] \Leftrightarrow MDapngm[c]$                                                          | -1000 | 1000 |  | Mouse secretion to outlet (body fluids) |
| MMEX_apngm(e)b     | $MDapngm[b] \Leftrightarrow$                                                                     | 0     | 1000 |  | Mouse secretion to outlet (body fluids) |
| MMACQCBALb         | $MMagcobal[b] \rightarrow MMagcobal[c]$                                                          | 0     | 1000 |  | Mouse secretion to outlet (body fluids) |
| MMEX_agcobal(e)b   | $MMagcobal[b] \Leftrightarrow$                                                                   | 0     | 1000 |  | Mouse secretion to outlet (body fluids) |
| MMARAB_Lb          | $MMarab-L[b] \Leftrightarrow MMarab-L[c]$                                                        | -1000 | 1000 |  | Mouse secretion to outlet (body fluids) |
| MMEX_arab-L(e)b    | $MMarab-L[b] \Leftrightarrow$                                                                    | 0     | 1000 |  | Mouse secretion to outlet (body fluids) |
| MMARACHDcb         | $MMarachd[b] \Leftrightarrow MMarachd[c]$                                                        | -1000 | 1000 |  | Mouse secretion to outlet (body fluids) |
| MMEX_arachd(e)b    | $MMarachd[b] \Leftrightarrow$                                                                    | 0     | 1000 |  | Mouse secretion to outlet (body fluids) |
| MMARACHtb          | $MMarachb[b] \Leftrightarrow MMarachd[c]$                                                        | -1000 | 1000 |  | Mouse secretion to outlet (body fluids) |
| MMEX_arach(e)b     | $MMarachb[b] \Leftrightarrow$                                                                    | 0     | 1000 |  | Mouse secretion to outlet (body fluids) |
| MMEX_by-L(e)b      | $MDty-L[b] \Leftrightarrow$                                                                      | 0     | 1000 |  | Mouse secretion to outlet (body fluids) |
| MMLYS5cb           | $MMty-L[b] \Leftrightarrow MMty-L[c]$                                                            | -1000 | 1000 |  | Mouse secretion to outlet (body fluids) |
| MMASCBb            | $MMasch-L[b] \Leftrightarrow MMasch-L[c]$                                                        | -1000 | 1000 |  | Mouse secretion to outlet (body fluids) |
| MMEX_asch-L(e)b    | $MMasch-L[b] \Leftrightarrow$                                                                    | 0     | 1000 |  | Mouse secretion to outlet (body fluids) |
| MMEX_asp-D(e)b     | $MDasp-D[b] \Leftrightarrow$                                                                     | 0     | 1000 |  | Mouse secretion to outlet (body fluids) |
| MMEX_k(e)b         | $MMk[b] \Leftrightarrow$                                                                         | -100  | 1000 |  | Mouse secretion to outlet (body fluids) |
| MMKCCb             | $MMk[b] + MMk[b] \Leftrightarrow MMk[c] + MMk[c]$                                                | -1000 | 1000 |  | Mouse secretion to outlet (body fluids) |
| MMEX_asp-L(e)b     | $MMasp-L[b] \Leftrightarrow$                                                                     | 0     | 1000 |  | Mouse secretion to outlet (body fluids) |
| MMEX_asp(e)b       | $MMasp[b] \Leftrightarrow$                                                                       | 0     | 1000 |  | Mouse secretion to outlet (body fluids) |
| MMEX_asp(e)b       | $MMasp[b] \Leftrightarrow$                                                                       | 0     | 1000 |  | Mouse secretion to outlet (body fluids) |
| MMEX_asp(e)b       | $MMasp[b] \Leftrightarrow$                                                                       | 0     | 1000 |  | Mouse secretion to outlet (body fluids) |
| MMEX_asp(e)b       | $MMasp[b] \Leftrightarrow$                                                                       | 0     | 1000 |  | Mouse secretion to outlet (body fluids) |
| MMAVITE1b          | $MMavite1[b] \rightarrow MMavite1[c]$                                                            | 0     | 1000 |  | Mouse secretion to outlet (body fluids) |
| MMEX_avite1(e)b    | $MMavite1[b] \Leftrightarrow$                                                                    | 0     | 1000 |  | Mouse secretion to outlet (body fluids) |
| MMVITEtb           | $MMtk2[c] + MMarg[c] + MMavite1[c] \rightarrow MMadr[c] + MMtk[c] + MMgk[c] + MMavite1[b]$       | 0     | 1000 |  | Mouse secretion to outlet (body fluids) |
| MMAVITE2b          | $MMavite2[b] \rightarrow MMavite2[c]$                                                            | 0     | 1000 |  | Mouse secretion to outlet (body fluids) |
| MMEX_avite2(e)b    | $MMavite2[b] \Leftrightarrow$                                                                    | 0     | 1000 |  | Mouse secretion to outlet (body fluids) |
| MMBALAVECSECb      | $MMtk2[c] + MMarg[c] + 3 MMtk-B[c] \rightarrow MMadr[c] + MMtk[c] + MMgk[c] + 3 MMtk-B[b]$       | 0     | 1000 |  | Mouse secretion to outlet (body fluids) |
| MMEX_akt-B(e)b     | $MMtk-B[b] \Leftrightarrow$                                                                      | 0     | 1000 |  | Mouse secretion to outlet (body fluids) |
| MMEX_hgk(e)b       | $MMhgk[b] \Leftrightarrow$                                                                       | 0     | 1000 |  | Mouse secretion to outlet (body fluids) |
| MMEX_glgk(e)b      | $MMglgkbb[b] \Leftrightarrow$                                                                    | 0     | 1000 |  | Mouse secretion to outlet (body fluids) |
| MMEX_gkche(e)b     | $MMgkche[b] \Leftrightarrow$                                                                     | 0     | 1000 |  | Mouse secretion to outlet (body fluids) |
| MMEX_gkche(e)b     | $MMgkche[b] \Leftrightarrow$                                                                     | 0     | 1000 |  | Mouse secretion to outlet (body fluids) |
| MMEX_hb(e)b        | $MMhb[b] \Leftrightarrow$                                                                        | 0     | 1000 |  | Mouse secretion to outlet (body fluids) |
| MMBILDGLCURcb      | $MMtk2[c] + MMarg[c] + MMbldglur[c] \Leftrightarrow MMadr[c] + MMtk[c] + MMgk[c] + MMbldglur[b]$ | 0     | 1000 |  | Mouse secretion to outlet (body fluids) |
| MMEX_hbldglur(e)b  | $MMbldglur[b] \Leftrightarrow$                                                                   | 0     | 1000 |  | Mouse secretion to outlet (body fluids) |
| MMBILGLCURcb       | $MMtk2[c] + MMarg[c] + MMbldglur[c] \Leftrightarrow MMadr[c] + MMtk[c] + MMgk[c] + MMbldglur[b]$ | 0     | 1000 |  | Mouse secretion to outlet (body fluids) |
| MMEX_hbldglur(e)b  | $MMbldglur[b] \Leftrightarrow$                                                                   | 0     | 1000 |  | Mouse secretion to outlet (body fluids) |
| MMEX_hbldglur(e)b  | $MMbldglur[b] \Leftrightarrow$                                                                   | 0     | 1000 |  | Mouse secretion to outlet (body fluids) |
| MMEX_hbldglur(e)b  | $MMbldglur[b] \Leftrightarrow$                                                                   | 0     | 1000 |  | Mouse secretion to outlet (body fluids) |
| MMEX_hbldglur(e)b  | $MMbldglur[b] \Leftrightarrow$                                                                   | 0     | 1000 |  | Mouse secretion to outlet (body fluids) |
| MMBINTb            | $MMtk[c] \rightarrow MMtk[b]$                                                                    | 0     | 1000 |  | Mouse secretion to outlet (body fluids) |
| MMEX_bnd(e)b       | $MMtk[b] \Leftrightarrow$                                                                        | 0     | 1000 |  | Mouse secretion to outlet (body fluids) |
| MMEX_bnd(e)b       | $MMtk[b] \Leftrightarrow$                                                                        | 0     | 1000 |  | Mouse secretion to outlet (body fluids) |

|                   |                                                                               |       |      |  |                                         |
|-------------------|-------------------------------------------------------------------------------|-------|------|--|-----------------------------------------|
| MMbVITEb          | MMbvisb] -> MMbvisc[                                                          | 0     | 1000 |  | Mouse secretion to outlet (body fluids) |
| MMEX_bvisc[e]b    | MMbvisb] <=>                                                                  | 0     | 1000 |  | Mouse secretion to outlet (body fluids) |
| MMbIZb            | MMbvisb] <=> MMbvisc[                                                         | -1000 | 1000 |  | Mouse secretion to outlet (body fluids) |
| MMEX_hvisc[e]b    | MMbvisb] <=>                                                                  | 0     | 1000 |  | Mouse secretion to outlet (body fluids) |
| MMEX_csi2[e]b     | MMcs2[b] <=>                                                                  | -100  | 1000 |  | Mouse secretion to outlet (body fluids) |
| MMcAMPb           | MMb2a[c] + MMbap[c] + MMcamp[c] -> MMbap[c] + MMb[c] + MMb[c] + MMcamp[b]     | 0     | 1000 |  | Mouse secretion to outlet (body fluids) |
| MMEX_camp[e]b     | MMcamp[b] <=>                                                                 | 0     | 1000 |  | Mouse secretion to outlet (body fluids) |
| MMcAROnb          | MMcarr[b] -> MMcarr[c]                                                        | -1000 | 1000 |  | Mouse secretion to outlet (body fluids) |
| MMEX_carr[e]b     | MMcarr[b] <=>                                                                 | 0     | 1000 |  | Mouse secretion to outlet (body fluids) |
| MMcARVEOLab       | MMcarrvisb] <=> MMcarrvisc[                                                   | -1000 | 1000 |  | Mouse secretion to outlet (body fluids) |
| MMEX_carrvisc[e]b | MMcarrvisb] <=>                                                               | 0     | 1000 |  | Mouse secretion to outlet (body fluids) |
| MMcBLTde_rb       | MMbdcch[c] <=> MMbdcch[b]                                                     | -1000 | 1000 |  | Mouse secretion to outlet (body fluids) |
| MMEX_abdcch[e]b   | MMbdcch[b] <=>                                                                | 0     | 1000 |  | Mouse secretion to outlet (body fluids) |
| MMCCA_d3b         | MMcca_d3[c] -> MMcca_d3[b]                                                    | 0     | 1000 |  | Mouse secretion to outlet (body fluids) |
| MMEX_cca_d3[e]b   | MMcca_d3[b] <=>                                                               | 0     | 1000 |  | Mouse secretion to outlet (body fluids) |
| MMcGMpb           | MMb2a[c] + MMbap[c] + MM35camp[c] -> MMbap[c] + MMb[c] + MMb[c] + MM35camp[b] | 0     | 1000 |  | Mouse secretion to outlet (body fluids) |
| MMEX_35camp[e]b   | MM35camp[b] <=>                                                               | 0     | 1000 |  | Mouse secretion to outlet (body fluids) |
| MMCHOLABAcab      | MMb2a[c] + MMbap[c] + MMchster[c] -> MMbap[c] + MMb[c] + MMb[c] + MMchster[b] | 0     | 1000 |  | Mouse secretion to outlet (body fluids) |
| MMCHOLESTDab      | MMchster[c] -> MMchster[b]                                                    | 0     | 1000 |  | Mouse secretion to outlet (body fluids) |
| MMEX_chster[e]b   | MMchster[b] <=>                                                               | 0     | 1000 |  | Mouse secretion to outlet (body fluids) |
| MMLCATLAb         | MMchster[b] + MMchchol_hb[b] -> MMbchol_hb[b] + MMbchol_hb[b]                 | 0     | 1000 |  | Mouse secretion to outlet (body fluids) |
| MMCHOLATL3b       | MMb2a[c] + MMbap[c] + MMchster[c] -> MMbap[c] + MMb[c] + MMb[c] + MMchster[b] | 0     | 1000 |  | Mouse secretion to outlet (body fluids) |
| MMEX_chchol[e]b   | MMchchol[b] <=>                                                               | 0     | 1000 |  | Mouse secretion to outlet (body fluids) |
| MMEX_chster[e]b   | MMchster[b] <=>                                                               | 0     | 1000 |  | Mouse secretion to outlet (body fluids) |
| MMEX_argame[e]b   | MMargam[b] <=>                                                                | 0     | 1000 |  | Mouse secretion to outlet (body fluids) |
| MMEX_cis[e]b      | MMcis[b] <=>                                                                  | 0     | 1000 |  | Mouse secretion to outlet (body fluids) |
| MMcLFORacnb       | 2 MMbvis[c] + MMcis[b] -> MMcis[c] + 2 MMbvis[b]                              | 0     | 1000 |  | Mouse secretion to outlet (body fluids) |
| MMcLFORac2b       | MMbvis[c] + 2 MMcis[b] -> 2 MMcis[c] + MMbvis[b]                              | 0     | 1000 |  | Mouse secretion to outlet (body fluids) |
| MMcL2Dacnb        | 2 MMb[c] + MMcis[b] -> MMcis[c] + 2 MMb[b]                                    | 0     | 1000 |  | Mouse secretion to outlet (body fluids) |
| MMcLOXAcac2b      | MMbvis[c] + 2 MMcis[b] -> 2 MMcis[c] + MMbvis[b]                              | 0     | 1000 |  | Mouse secretion to outlet (body fluids) |
| MMEX_cis[e]b      | MMcis[b] <=>                                                                  | -100  | 1000 |  | Mouse secretion to outlet (body fluids) |
| MMcOAcLac2b       | MMcis[c] + 2 MMbvis[b] -> 2 MMbvis[c] + MMcis[b]                              | 0     | 1000 |  | Mouse secretion to outlet (body fluids) |
| MMEX_fer[e]b      | MMfer[b] <=>                                                                  | 0     | 1000 |  | Mouse secretion to outlet (body fluids) |
| MMEX_ice[e]b      | MMice[b] <=>                                                                  | 0     | 1000 |  | Mouse secretion to outlet (body fluids) |
| MMIb              | MMIb] <=> MMIc[                                                               | -1000 | 1000 |  | Mouse secretion to outlet (body fluids) |
| MMEX_ome[e]b      | MMome[b] <=>                                                                  | 0     | 1000 |  | Mouse secretion to outlet (body fluids) |
| MMcOAcOXAcac2b    | MMbvis[c] + 2 MMbvis[b] -> 2 MMbvis[c] + MMbvis[b]                            | 0     | 1000 |  | Mouse secretion to outlet (body fluids) |
| MMcLPNDab         | MMcqpul[b] <=> MMcqpul[c]                                                     | -1000 | 1000 |  | Mouse secretion to outlet (body fluids) |
| MMEX_CLPNDab      | MMcqpul[b] <=>                                                                | 0     | 1000 |  | Mouse secretion to outlet (body fluids) |
| MMCO2b            | MMcs2[b] <=> MMcs2[c]                                                         | -1000 | 1000 |  | Mouse secretion to outlet (body fluids) |
| MMEX_cs2[e]b      | MMcs2[b] <=>                                                                  | -100  | 1000 |  | Mouse secretion to outlet (body fluids) |
| MMcORE4b          | MMccore4[g] -> MMccore4[b]                                                    | 0     | 1000 |  | Mouse secretion to outlet (body fluids) |
| MMEX_core4[e]b    | MMccore4[b] <=>                                                               | 0     | 1000 |  | Mouse secretion to outlet (body fluids) |
| MMcORE5b          | MMccore5[g] -> MMccore5[b]                                                    | 0     | 1000 |  | Mouse secretion to outlet (body fluids) |
| MMEX_core5[e]b    | MMccore5[b] <=>                                                               | 0     | 1000 |  | Mouse secretion to outlet (body fluids) |
| MMcORE7b          | MMccore7[g] -> MMccore7[b]                                                    | 0     | 1000 |  | Mouse secretion to outlet (body fluids) |
| MMEX_core7[e]b    | MMccore7[b] <=>                                                               | 0     | 1000 |  | Mouse secretion to outlet (body fluids) |
| MMcORE8b          | MMccore8[g] -> MMccore8[b]                                                    | 0     | 1000 |  | Mouse secretion to outlet (body fluids) |
| MMEX_core8[e]b    | MMccore8[b] <=>                                                               | 0     | 1000 |  | Mouse secretion to outlet (body fluids) |
| MMcOUMARINab      | MMcounam[b] <=> MMcounam[c]                                                   | -1000 | 1000 |  | Mouse secretion to outlet (body fluids) |
| MMEX_counam[e]b   | MMcounam[b] <=>                                                               | 0     | 1000 |  | Mouse secretion to outlet (body fluids) |
| MMCOab            | MMcsc[c] <=> MMcsc[b]                                                         | -1000 | 1000 |  | Mouse secretion to outlet (body fluids) |
| MMEX_csc[e]b      | MMcsc[b] <=>                                                                  | 0     | 1000 |  | Mouse secretion to outlet (body fluids) |
| MMEX_creat[e]b    | MMcreat[b] <=>                                                                | 0     | 1000 |  | Mouse secretion to outlet (body fluids) |
| MMcRMPab          | MMcemp_ha[c] <=> MMcemp_ha[b]                                                 | -1000 | 1000 |  | Mouse secretion to outlet (body fluids) |
| MMEX_cemp_ha[e]b  | MMcemp_ha[b] <=>                                                              | 0     | 1000 |  | Mouse secretion to outlet (body fluids) |
| MMcRNVb           | MMcrrn[b] <=> MMcrrn[c]                                                       | -1000 | 1000 |  | Mouse secretion to outlet (body fluids) |
| MMEX_crrn[e]b     | MMcrrn[b] <=>                                                                 | 0     | 1000 |  | Mouse secretion to outlet (body fluids) |
| MMcRTSLab         | MMcrrsl[b] <=> MMcrrsl[c]                                                     | -1000 | 1000 |  | Mouse secretion to outlet (body fluids) |
| MMEX_crrsl[e]b    | MMcrrsl[b] <=>                                                                | 0     | 1000 |  | Mouse secretion to outlet (body fluids) |
| MMcKRISTRNb       | MMcrrstrn[b] <=> MMcrrstrn[c]                                                 | -1000 | 1000 |  | Mouse secretion to outlet (body fluids) |
| MMEX_crrstrn[e]b  | MMcrrstrn[b] <=>                                                              | 0     | 1000 |  | Mouse secretion to outlet (body fluids) |
| MMcRVNCab         | MMcrrvac[b] <=> MMcrrvac[c]                                                   | -1000 | 1000 |  | Mouse secretion to outlet (body fluids) |
| MMEX_crrvac[e]b   | MMcrrvac[b] <=>                                                               | 0     | 1000 |  | Mouse secretion to outlet (body fluids) |
| MMCSNb            | MMcscn[b] <=> MMcscn[c]                                                       | -1000 | 1000 |  | Mouse secretion to outlet (body fluids) |
| MMEX_cscn[e]b     | MMcscn[b] <=>                                                                 | 0     | 1000 |  | Mouse secretion to outlet (body fluids) |
| MMcSPG_Aab        | MMcspg_a[g] -> MMcspg_a[b]                                                    | 0     | 1000 |  | Mouse secretion to outlet (body fluids) |
| MMcSPG_Ayb        | MMcspg_a[b] -> MMcspg_a[l]                                                    | 0     | 1000 |  | Mouse secretion to outlet (body fluids) |
| MMEX_cspg_a[e]b   | MMcspg_a[b] <=>                                                               | 0     | 1000 |  | Mouse secretion to outlet (body fluids) |
| MMcSPG_Bab        | MMcspg_b[g] -> MMcspg_b[b]                                                    | 0     | 1000 |  | Mouse secretion to outlet (body fluids) |
| MMEX_cspg_b[e]b   | MMcspg_b[b] <=>                                                               | 0     | 1000 |  | Mouse secretion to outlet (body fluids) |
| MMEX_cspg_b[e]b   | MMcspg_b[b] <=>                                                               | 0     | 1000 |  | Mouse secretion to outlet (body fluids) |
| MMcSPG_Cb         | MMcspg_c[g] -> MMcspg_c[b]                                                    | 0     | 1000 |  | Mouse secretion to outlet (body fluids) |
| MMcSPG_Cyb        | MMcspg_c[b] -> MMcspg_c[l]                                                    | 0     | 1000 |  | Mouse secretion to outlet (body fluids) |
| MMEX_cspg_c[e]b   | MMcspg_c[b] <=>                                                               | 0     | 1000 |  | Mouse secretion to outlet (body fluids) |
| MMcSPG_Dab        | MMcspg_d[g] -> MMcspg_d[b]                                                    | 0     | 1000 |  | Mouse secretion to outlet (body fluids) |
| MMcSPG_Dyb        | MMcspg_d[b] -> MMcspg_d[l]                                                    | 0     | 1000 |  | Mouse secretion to outlet (body fluids) |
| MMEX_cspg_d[e]b   | MMcspg_d[b] <=>                                                               | 0     | 1000 |  | Mouse secretion to outlet (body fluids) |
| MMcSPG_Eab        | MMcspg_e[g] -> MMcspg_e[b]                                                    | 0     | 1000 |  | Mouse secretion to outlet (body fluids) |
| MMcSPG_Eyb        | MMcspg_e[b] -> MMcspg_e[l]                                                    | 0     | 1000 |  | Mouse secretion to outlet (body fluids) |
| MMEX_cspg_e[e]b   | MMcspg_e[b] <=>                                                               | 0     | 1000 |  | Mouse secretion to outlet (body fluids) |
| MMcYANb           | MMcynm[b] <=> MMcynm[c]                                                       | -1000 | 1000 |  | Mouse secretion to outlet (body fluids) |
| MMEX_cynm[e]b     | MMcynm[b] <=>                                                                 | 0     | 1000 |  | Mouse secretion to outlet (body fluids) |
| MMcYSTGLUab       | MMgha_L[c] + MMcystm[b] -> MMcystm[c] + MMgha_L[b]                            | 0     | 1000 |  | Mouse secretion to outlet (body fluids) |
| MMEX_cystm[e]b    | MMcystm[b] <=>                                                                | 0     | 1000 |  | Mouse secretion to outlet (body fluids) |

|                          |                                                                                                                                                             |       |      |  |                                         |
|--------------------------|-------------------------------------------------------------------------------------------------------------------------------------------------------------|-------|------|--|-----------------------------------------|
| MMEX_glu_L(c)b           | MMglu_L(b) <=>                                                                                                                                              | 0     | 1000 |  | Mouse secretion to outlet (body fluids) |
| MMCYTDb                  | MMcytdb <=> MMcytd[c]                                                                                                                                       | -1000 | 1000 |  | Mouse secretion to outlet (body fluids) |
| MMEX_cytd(c)b            | MMcytd(b) <=>                                                                                                                                               | 0     | 1000 |  | Mouse secretion to outlet (body fluids) |
| MMdADNdb                 | MMdad_2(b) <=> MMdad_2[c]                                                                                                                                   | -1000 | 1000 |  | Mouse secretion to outlet (body fluids) |
| MMEX_dad_2(c)b           | MMdad_2(b) <=>                                                                                                                                              | 0     | 1000 |  | Mouse secretion to outlet (body fluids) |
| MMdRNb                   | MMdad(b) <=> MMdad(c)                                                                                                                                       | -1000 | 1000 |  | Mouse secretion to outlet (body fluids) |
| MMEX_dad(c)b             | MMdad(b) <=>                                                                                                                                                | 0     | 1000 |  | Mouse secretion to outlet (body fluids) |
| MMdAGb                   | MMdag_b(b) <=> MMdag_b[c]                                                                                                                                   | -1000 | 1000 |  | Mouse secretion to outlet (body fluids) |
| MMEX_dag_b(c)b           | MMdag_b(b) <=>                                                                                                                                              | 0     | 1000 |  | Mouse secretion to outlet (body fluids) |
| MMDCSPIN1b               | MMdcspn1(b) <=> MMdcspn1[c]                                                                                                                                 | -1000 | 1000 |  | Mouse secretion to outlet (body fluids) |
| MMEX_dcspn1(c)b          | MMdcspn1(b) <=>                                                                                                                                             | 0     | 1000 |  | Mouse secretion to outlet (body fluids) |
| MMDCYTb                  | MMdcyt(b) <=> MMdcyt[c]                                                                                                                                     | -1000 | 1000 |  | Mouse secretion to outlet (body fluids) |
| MMEX_dcyt(c)b            | MMdcyt(b) <=>                                                                                                                                               | 0     | 1000 |  | Mouse secretion to outlet (body fluids) |
| MMdEBRISQUINb            | MMdbrisoquin(b) <=> MMdbrisoquin[c]                                                                                                                         | -1000 | 1000 |  | Mouse secretion to outlet (body fluids) |
| MMEX_dbrisoquin(c)b      | MMdbrisoquin(b) <=>                                                                                                                                         | 0     | 1000 |  | Mouse secretion to outlet (body fluids) |
| MMdGCHb                  | MMdghb(b) <=> MMdghb[c]                                                                                                                                     | -1000 | 1000 |  | Mouse secretion to outlet (body fluids) |
| MMEX_dghb(c)b            | MMdghb(b) <=>                                                                                                                                               | 0     | 1000 |  | Mouse secretion to outlet (body fluids) |
| MMdGShb                  | MMdgsb(b) <=> MMdgs(c)                                                                                                                                      | -1000 | 1000 |  | Mouse secretion to outlet (body fluids) |
| MMEX_dgs(c)b             | MMdgs(b) <=>                                                                                                                                                | 0     | 1000 |  | Mouse secretion to outlet (body fluids) |
| MMdHAA1b                 | MMdhahb(b) <=> MMdhahb[c]                                                                                                                                   | -1000 | 1000 |  | Mouse secretion to outlet (body fluids) |
| MMEX_dhahb(c)b           | MMdhahb(b) <=>                                                                                                                                              | 0     | 1000 |  | Mouse secretion to outlet (body fluids) |
| MMdGALSGLSIDb            | MMdgalgalactide_b(b) <=> MMdgalgalactide_b[c]                                                                                                               | -1000 | 1000 |  | Mouse secretion to outlet (body fluids) |
| MMEX_dgalgalactide_b(c)b | MMdgalgalactide_b(b) <=>                                                                                                                                    | 0     | 1000 |  | Mouse secretion to outlet (body fluids) |
| MMdLNLcGb                | MMdlngb(b) <=> MMdlng(c)                                                                                                                                    | -1000 | 1000 |  | Mouse secretion to outlet (body fluids) |
| MMEX_dlng(c)b            | MMdlng(b) <=>                                                                                                                                               | 0     | 1000 |  | Mouse secretion to outlet (body fluids) |
| MMdMANTIPYRINb           | MMdmantipyrin(b) <=> MMdmantipyrin[c]                                                                                                                       | -1000 | 1000 |  | Mouse secretion to outlet (body fluids) |
| MMEX_dmantipyrin(c)b     | MMdmantipyrin(b) <=>                                                                                                                                        | 0     | 1000 |  | Mouse secretion to outlet (body fluids) |
| MMdMHPTCRNsb             | MMdmptcrn(c) <=> MMdmptcrn(b)                                                                                                                               | -1000 | 1000 |  | Mouse secretion to outlet (body fluids) |
| MMEX_dmptcrn(c)b         | MMdmptcrn(b) <=>                                                                                                                                            | 0     | 1000 |  | Mouse secretion to outlet (body fluids) |
| MMdOPASfb                | MMdopaf(c) <=> MMdopaf(b)                                                                                                                                   | 0     | 1000 |  | Mouse secretion to outlet (body fluids) |
| MMEX_dopaf(c)b           | MMdopaf(b) <=>                                                                                                                                              | 0     | 1000 |  | Mouse secretion to outlet (body fluids) |
| MMdOPAVISecb             | $2 \text{ MMb2(c)} + 2 \text{ MMdop(c)} + 3 \text{ MMdopaf(c)} \rightarrow 2 \text{ MMdop(c)} + 2 \text{ MMb(c)} + 2 \text{ MMd(c)} + 3 \text{ MMdopaf(b)}$ | 0     | 1000 |  | Mouse secretion to outlet (body fluids) |
| MMdOPab                  | MMdopaf(b) <=> MMdopaf(c)                                                                                                                                   | -1000 | 1000 |  | Mouse secretion to outlet (body fluids) |
| MMEX_dopaf(c)b           | MMdopaf(b) <=>                                                                                                                                              | 0     | 1000 |  | Mouse secretion to outlet (body fluids) |
| MMdRb                    | MMdrb(b) <=> MMdrb(c)                                                                                                                                       | -1000 | 1000 |  | Mouse secretion to outlet (body fluids) |
| MMEX_drb(c)b             | MMdrb(b) <=>                                                                                                                                                | 0     | 1000 |  | Mouse secretion to outlet (body fluids) |
| MMdST_ANTIGENb           | MMdst_antigen(g) <=> MMdst_antigen(b)                                                                                                                       | 0     | 1000 |  | Mouse secretion to outlet (body fluids) |
| MMEX_dst_antigen(c)b     | MMdst_antigen(b) <=>                                                                                                                                        | 0     | 1000 |  | Mouse secretion to outlet (body fluids) |
| MMdRb                    | MMdrb(b) <=> MMdr(c)                                                                                                                                        | -1000 | 1000 |  | Mouse secretion to outlet (body fluids) |
| MMEX_drb(c)b             | MMdr(b) <=>                                                                                                                                                 | 0     | 1000 |  | Mouse secretion to outlet (body fluids) |
| MMD_3Ab                  | MMdab-D(c) <=> MMdab-D(b)                                                                                                                                   | 0     | 1000 |  | Mouse secretion to outlet (body fluids) |
| MMEX_3ab_D(c)b           | MMdab-D(b) <=>                                                                                                                                              | 0     | 1000 |  | Mouse secretion to outlet (body fluids) |
| MMEX_3a_D(c)b            | MMdab-D(b) <=>                                                                                                                                              | 0     | 1000 |  | Mouse secretion to outlet (body fluids) |
| MMdEFLATOXINb            | MMeflatoxin(b) <=> MMeflatoxin(c)                                                                                                                           | -1000 | 1000 |  | Mouse secretion to outlet (body fluids) |
| MMEX_eflatoxin(c)b       | MMeflatoxin(b) <=>                                                                                                                                          | 0     | 1000 |  | Mouse secretion to outlet (body fluids) |
| MMdERASTINb              | MMehastin(b) <=> MMehastin(c)                                                                                                                               | -1000 | 1000 |  | Mouse secretion to outlet (body fluids) |
| MMEX_ehastin(c)b         | MMehastin(b) <=>                                                                                                                                            | 0     | 1000 |  | Mouse secretion to outlet (body fluids) |
| MMdECOSTETb              | MMecostet(b) <=> MMecostet(c)                                                                                                                               | -1000 | 1000 |  | Mouse secretion to outlet (body fluids) |
| MMEX_ecostet(c)b         | MMecostet(b) <=>                                                                                                                                            | 0     | 1000 |  | Mouse secretion to outlet (body fluids) |
| MMdLADb                  | MMclal(b) <=> MMclal(c)                                                                                                                                     | -1000 | 1000 |  | Mouse secretion to outlet (body fluids) |
| MMEX_clal(c)b            | MMclal(b) <=>                                                                                                                                               | 0     | 1000 |  | Mouse secretion to outlet (body fluids) |
| MMdSTRADIOLGLC2b         | $\text{MMb2(c)} + \text{MMdop(c)} + \text{MMestradiol(c)} \rightarrow \text{MMdop(c)} + \text{MMb(c)} + \text{MMd(c)} + \text{MMestradiol(b)}$              | 0     | 1000 |  | Mouse secretion to outlet (body fluids) |
| MMEX_estradiolgl(c)b     | MMestradiol(b) <=>                                                                                                                                          | 0     | 1000 |  | Mouse secretion to outlet (body fluids) |
| MMdSTRADIOLb             | MMestradiol(b) <=> MMestradiol(c)                                                                                                                           | -1000 | 1000 |  | Mouse secretion to outlet (body fluids) |
| MMEX_estradiol(c)b       | MMestradiol(b) <=>                                                                                                                                          | 0     | 1000 |  | Mouse secretion to outlet (body fluids) |
| MMdSTRIOGLCcb            | $\text{MMb2(c)} + \text{MMdop(c)} + \text{MMestrongl(c)} \rightarrow \text{MMdop(c)} + \text{MMb(c)} + \text{MMd(c)} + \text{MMestrongl(b)}$                | 0     | 1000 |  | Mouse secretion to outlet (body fluids) |
| MMEX_estrongl(c)b        | MMestrongl(b) <=>                                                                                                                                           | 0     | 1000 |  | Mouse secretion to outlet (body fluids) |
| MMdSTRONIGLCb            | $\text{MMb2(c)} + \text{MMdop(c)} + \text{MMestrongl(c)} \rightarrow \text{MMdop(c)} + \text{MMb(c)} + \text{MMd(c)} + \text{MMestrongl(b)}$                | 0     | 1000 |  | Mouse secretion to outlet (body fluids) |
| MMEX_estrongl(c)b        | MMestrongl(b) <=>                                                                                                                                           | 0     | 1000 |  | Mouse secretion to outlet (body fluids) |
| MMEX_estron(c)b          | MMestron(b) <=>                                                                                                                                             | 0     | 1000 |  | Mouse secretion to outlet (body fluids) |
| MMETHa                   | MMetha(c) <=> MMetha(b)                                                                                                                                     | 0     | 1000 |  | Mouse secretion to outlet (body fluids) |
| MMEX_etha(c)b            | MMetha(b) <=>                                                                                                                                               | 0     | 1000 |  | Mouse secretion to outlet (body fluids) |
| MMETO1b                  | MMetol(b) <=> MMetol(c)                                                                                                                                     | -1000 | 1000 |  | Mouse secretion to outlet (body fluids) |
| MMEX_eto1(c)b            | MMetol(b) <=>                                                                                                                                               | 0     | 1000 |  | Mouse secretion to outlet (body fluids) |
| MMEX_10b1(c)b            | MM10b1(b) <=>                                                                                                                                               | 0     | 1000 |  | Mouse secretion to outlet (body fluids) |
| MMEX_10b15g1(c)b         | MM10b15g1(b) <=>                                                                                                                                            | 0     | 1000 |  | Mouse secretion to outlet (body fluids) |
| MMEX_10b15g1(c)b         | MM10b15g1(b) <=>                                                                                                                                            | 0     | 1000 |  | Mouse secretion to outlet (body fluids) |
| MMEX_10b17g1(c)b         | MM10b17g1(b) <=>                                                                                                                                            | 0     | 1000 |  | Mouse secretion to outlet (body fluids) |
| MMEX_11_cis_ref1(c)b     | MM11_cis_ref1(b) <=>                                                                                                                                        | 0     | 1000 |  | Mouse secretion to outlet (body fluids) |
| MMdRETFA2b               | MM11_cis_ref1(c) <=> MM11_cis_ref1(b)                                                                                                                       | 0     | 1000 |  | Mouse secretion to outlet (body fluids) |
| MMEX_13_cis_reng1(c)b    | MM13_cis_reng1(b) <=>                                                                                                                                       | 0     | 1000 |  | Mouse secretion to outlet (body fluids) |
| MMdRETNGLC2b             | MM13_cis_reng1(c) <=> MM13_cis_reng1(b)                                                                                                                     | 0     | 1000 |  | Mouse secretion to outlet (body fluids) |
| MMEX_1gbc_b(c)b          | MM1gbc_b(b) <=>                                                                                                                                             | 0     | 1000 |  | Mouse secretion to outlet (body fluids) |
| MMEX_34dph(c)b           | MM34dph(b) <=>                                                                                                                                              | 0     | 1000 |  | Mouse secretion to outlet (body fluids) |
| MMEX_4HPR(c)b            | MM4hpr_L1(b) <=>                                                                                                                                            | 0     | 1000 |  | Mouse secretion to outlet (body fluids) |
| MMEX_4phac(c)b           | MM4phac(b) <=>                                                                                                                                              | 0     | 1000 |  | Mouse secretion to outlet (body fluids) |
| MMdHPACb                 | MM4phac(c) <=> MM4phac(b)                                                                                                                                   | -1000 | 1000 |  | Mouse secretion to outlet (body fluids) |
| MMEX_5db(c)b             | MM5db(b) <=>                                                                                                                                                | 0     | 1000 |  | Mouse secretion to outlet (body fluids) |
| MMEX_5db(c)b             | MM5db(b) <=>                                                                                                                                                | 0     | 1000 |  | Mouse secretion to outlet (body fluids) |
| MMEX_6db(c)b             | MM6db(b) <=>                                                                                                                                                | 0     | 1000 |  | Mouse secretion to outlet (body fluids) |
| MMEX_6db(c)b             | MM6db(b) <=>                                                                                                                                                | 0     | 1000 |  | Mouse secretion to outlet (body fluids) |
| MMEX_7db(c)b             | MM7db(b) <=>                                                                                                                                                | 0     | 1000 |  | Mouse secretion to outlet (body fluids) |
| MMEX_7db(c)b             | MM7db(b) <=>                                                                                                                                                | 0     | 1000 |  | Mouse secretion to outlet (body fluids) |

|                                                  |                                                                                                  |       |      |  |                                         |
|--------------------------------------------------|--------------------------------------------------------------------------------------------------|-------|------|--|-----------------------------------------|
| MMEX_9_cis-ret[a]b                               | MM9_cis-ret[a]b <=>                                                                              | 0     | 1000 |  | Moose secretion to outlet (body fluids) |
| MMRETFArb                                        | MM9_cis-ret[c] -> MM9_cis-ret[a]b                                                                | 0     | 1000 |  | Moose secretion to outlet (body fluids) |
| MMEX_Rosa[c]b                                    | MMRosa[b] <=>                                                                                    | 0     | 1000 |  | Moose secretion to outlet (body fluids) |
| MMRTOTALb                                        | MMRosa[b] <=> MMRosa[c]                                                                          | -1000 | 1000 |  | Moose secretion to outlet (body fluids) |
| MMEX_Rosa2[c]b                                   | MMRosa2[b] <=>                                                                                   | 0     | 1000 |  | Moose secretion to outlet (body fluids) |
| MMRTOTAL2b                                       | MMRosa2[b] <=> MMRosa2[c]                                                                        | -1000 | 1000 |  | Moose secretion to outlet (body fluids) |
| MMEX_Rosa3[c]b                                   | MMRosa3[b] <=>                                                                                   | 0     | 1000 |  | Moose secretion to outlet (body fluids) |
| MMRTOTAL3b                                       | MMRosa3[b] <=> MMRosa3[c]                                                                        | -1000 | 1000 |  | Moose secretion to outlet (body fluids) |
| MMEX_Tyr_gm[c]b                                  | MMTyr-gm[b] <=>                                                                                  | 0     | 1000 |  | Moose secretion to outlet (body fluids) |
| MMEX_adp[cy]b                                    | MMadp[cy]b <=>                                                                                   | 0     | 1000 |  | Moose secretion to outlet (body fluids) |
| MMEX_ahs[cy]b                                    | MMahs[cy]b <=>                                                                                   | 0     | 1000 |  | Moose secretion to outlet (body fluids) |
| MMEX_canc[c]b                                    | MMcanc[b] <=>                                                                                    | 0     | 1000 |  | Moose secretion to outlet (body fluids) |
| MMEX_cure[c]b                                    | MMcure[b] <=>                                                                                    | 0     | 1000 |  | Moose secretion to outlet (body fluids) |
| MMEX_dad-5[c]b                                   | MMdad-5[b] <=>                                                                                   | 0     | 1000 |  | Moose secretion to outlet (body fluids) |
| MMEX_dhac[c]b                                    | MMdhac[b] <=>                                                                                    | 0     | 1000 |  | Moose secretion to outlet (body fluids) |
| MMEX_dhc[c]b                                     | MMdhc[b] <=>                                                                                     | 0     | 1000 |  | Moose secretion to outlet (body fluids) |
| MMEX_fla[c]b                                     | MMfla[b] <=>                                                                                     | 0     | 1000 |  | Moose secretion to outlet (body fluids) |
| MMF1Ab                                           | MMf1a[g] -> MMf1a[b]                                                                             | 0     | 1000 |  | Moose secretion to outlet (body fluids) |
| MMEX_f62[c]b                                     | MMf62[b] <=>                                                                                     | 0     | 1000 |  | Moose secretion to outlet (body fluids) |
| MMFE2b                                           | MMfe2[b] -> MMfe2[c]                                                                             | 0     | 1000 |  | Moose secretion to outlet (body fluids) |
| MMEX_fc3[c]b                                     | MMfc3[b] <=>                                                                                     | 0     | 1000 |  | Moose secretion to outlet (body fluids) |
| MMEX_f64[c]b                                     | MMf64[b] <=>                                                                                     | 0     | 1000 |  | Moose secretion to outlet (body fluids) |
| MMEX_fur[c]b                                     | MMfur[b] <=>                                                                                     | 0     | 1000 |  | Moose secretion to outlet (body fluids) |
| MMEX_fac13galsgkpgal4acgpgphside_h[c]b           | MMfac13galsgkpgal4acgpgphside_h[b] <=>                                                           | 0     | 1000 |  | Moose secretion to outlet (body fluids) |
| MMFUC1GALACGLGAL14ACGLGALGLUSIDb                 | MMfac13galsgkpgal4acgpgphside_h[b] <=><br>MMfac13galsgkpgal4acgpgphside_h[c]                     | -1000 | 1000 |  | Moose secretion to outlet (body fluids) |
| MMEX_fac14galsgkpgphside_h[c]b                   | MMfac14galsgkpgphside_h[b] <=>                                                                   | 0     | 1000 |  | Moose secretion to outlet (body fluids) |
| MMFUC14GALACGLGALGLUSIDb                         | MMfac14galsgkpgphside_h[b] <=><br>MMfac14galsgkpgphside_h[c]                                     | -1000 | 1000 |  | Moose secretion to outlet (body fluids) |
| MMEX_fac_Lic[b]                                  | MMfac_L[b] <=>                                                                                   | 0     | 1000 |  | Moose secretion to outlet (body fluids) |
| MMEX_facacgalsgkpgphside_h[c]b                   | MMfacacgalsgkpgkpgphside_h[b] <=>                                                                | 0     | 1000 |  | Moose secretion to outlet (body fluids) |
| MMFUCACGALFUCGALACGLGALGLUSIDb                   | MMfacacgalsgkpgkpgphside_h[b] <=><br>MMfacacgalsgkpgkpgphside_h[c]                               | -1000 | 1000 |  | Moose secretion to outlet (body fluids) |
| MMEX_facacgall4acgpgphside_h[c]b                 | MMfacacgall4acgpgphside_h[b] <=>                                                                 | 0     | 1000 |  | Moose secretion to outlet (body fluids) |
| MMFUCACNGAL14ACGLGALGLUSIDb                      | MMfacacgall4acgpgphside_h[b] <=><br>MMfacacgall4acgpgphside_h[c]                                 | -1000 | 1000 |  | Moose secretion to outlet (body fluids) |
| MMEX_facacgalsgkpgphside_h[c]b                   | MMfacacgalsgkpgphside_h[b] <=>                                                                   | 0     | 1000 |  | Moose secretion to outlet (body fluids) |
| MMFUCACNGALACGLGALGLUSIDb                        | MMfacacgalsgkpgphside_h[b] <=><br>MMfacacgalsgkpgphside_h[c]                                     | -1000 | 1000 |  | Moose secretion to outlet (body fluids) |
| MMEX_facfc12gall4acgpgphside_h[c]b               | MMfacfc12gall4acgpgphside_h[b] <=>                                                               | 0     | 1000 |  | Moose secretion to outlet (body fluids) |
| MMFUCFUC12GAL14ACGLGALGLUSIDb                    | MMfacfc12gall4acgpgphside_h[b] <=><br>MMfacfc12gall4acgpgphside_h[c]                             | -1000 | 1000 |  | Moose secretion to outlet (body fluids) |
| MMEX_facfc12galsgkpgal4acgpgphside_h[c]b         | MMfacfc12galsgkpgal4acgpgphside_h[b] <=>                                                         | 0     | 1000 |  | Moose secretion to outlet (body fluids) |
| MMFUCFUC12GALACGLGAL14ACGLGALGLUSIDb             | MMfacfc12galsgkpgal4acgpgphside_h[b] <=><br>MMfacfc12galsgkpgal4acgpgphside_h[c]                 | -1000 | 1000 |  | Moose secretion to outlet (body fluids) |
| MMEX_facfc12galsgkpgal4acgpgphside_h[c]b         | MMfacfc12galsgkpgal4acgpgphside_h[b] <=>                                                         | 0     | 1000 |  | Moose secretion to outlet (body fluids) |
| MMFUCFUC12GALACGLGAL14ACGLGALGLUSIDb             | MMfacfc12galsgkpgal4acgpgphside_h[b] <=><br>MMfacfc12galsgkpgal4acgpgphside_h[c]                 | -1000 | 1000 |  | Moose secretion to outlet (body fluids) |
| MMEX_facfcgalsgkpg13galsgkpgal4acgpgphside_h[c]b | MMfacfcgalsgkpg13galsgkpgal4acgpgphside_h[b] <=>                                                 | 0     | 1000 |  | Moose secretion to outlet (body fluids) |
| MMFUCFUCFUC13GALACGLGAL14ACGLGALGLUSIDb          | MMfacfcgalsgkpg13galsgkpgal4acgpgphside_h[b] <=><br>MMfacfcgalsgkpg13galsgkpgal4acgpgphside_h[c] | -1000 | 1000 |  | Moose secretion to outlet (body fluids) |
| MMEX_facfcgalsgkpgkpgal4acgpgphside_h[c]b        | MMfacfcgalsgkpgkpgal4acgpgphside_h[b] <=>                                                        | 0     | 1000 |  | Moose secretion to outlet (body fluids) |
| MMFUCFUCFUCGALACGLGAL14ACGLGALGLUSIDb            | MMfacfcgalsgkpgkpgal4acgpgphside_h[b] <=><br>MMfacfcgalsgkpgkpgal4acgpgphside_h[c]               | -1000 | 1000 |  | Moose secretion to outlet (body fluids) |
| MMEX_facfcgalsgkpgphside_h[c]b                   | MMfacfcgalsgkpgphside_h[b] <=>                                                                   | 0     | 1000 |  | Moose secretion to outlet (body fluids) |
| MMFUCFUCGALACGLGALGLUSIDb                        | MMfacfcgalsgkpgphside_h[b] <=><br>MMfacfcgalsgkpgphside_h[c]                                     | -1000 | 1000 |  | Moose secretion to outlet (body fluids) |
| MMEX_facgall4acgpgphside_h[c]b                   | MMfacgall4acgpgphside_h[b] <=>                                                                   | 0     | 1000 |  | Moose secretion to outlet (body fluids) |
| MMFUCGAL14ACGLGALGLUSIDb                         | MMfacgall4acgpgphside_h[b] <=><br>MMfacgall4acgpgphside_h[c]                                     | -1000 | 1000 |  | Moose secretion to outlet (body fluids) |
| MMEX_facgalsgkpgkpgphside_h[c]b                  | MMfacgalsgkpgkpgphside_h[b] <=>                                                                  | 0     | 1000 |  | Moose secretion to outlet (body fluids) |
| MMFUCGALFUCGALACGLGALGLUSIDb                     | MMfacgalsgkpgkpgphside_h[b] <=><br>MMfacgalsgkpgkpgphside_h[c]                                   | -1000 | 1000 |  | Moose secretion to outlet (body fluids) |
| MMEX_galsgphside_h[c]b                           | MMgalsgphside_h[b] <=>                                                                           | 0     | 1000 |  | Moose secretion to outlet (body fluids) |
| MMFUCGALBSIDb                                    | MMgalsgphside_h[c] <=> MMgalsgphside_h[b]                                                        | -1000 | 1000 |  | Moose secretion to outlet (body fluids) |
| MMEX_gals[c]b                                    | MMgal[b] <=>                                                                                     | 0     | 1000 |  | Moose secretion to outlet (body fluids) |
| MMGAL1b                                          | MMgal[b] <=> MMgal[c]                                                                            | -1000 | 1000 |  | Moose secretion to outlet (body fluids) |
| MMEX_galsgkpgphside_h[c]b                        | MMgalsgkpgphside_h[b] <=>                                                                        | 0     | 1000 |  | Moose secretion to outlet (body fluids) |
| MMGALACGLGALGBSIDb                               | MMgalsgkpgphside_h[c] <=> MMgalsgkpgphside_h[b]                                                  | -1000 | 1000 |  | Moose secretion to outlet (body fluids) |
| MMEX_gals[c]b                                    | MMgal[b] <=>                                                                                     | 0     | 1000 |  | Moose secretion to outlet (body fluids) |
| MMGALAMb                                         | MMgalam[b] <=> MMgalam[c]                                                                        | -1000 | 1000 |  | Moose secretion to outlet (body fluids) |
| MMEX_galls12gall4acgpgphside_h[c]b               | MMgalls12gall4acgpgphside_h[b] <=>                                                               | 0     | 1000 |  | Moose secretion to outlet (body fluids) |
| MMGALFUC12GAL14ACGLGALGLUSIDb                    | MMgalls12gall4acgpgphside_h[b] <=><br>MMgalls12gall4acgpgphside_h[c]                             | -1000 | 1000 |  | Moose secretion to outlet (body fluids) |
| MMEX_gallsgalsgkpgal4acgpgphside_h[c]b           | MMgallsgalsgkpgal4acgpgphside_h[b] <=>                                                           | 0     | 1000 |  | Moose secretion to outlet (body fluids) |
| MMGALFUCGALACGLGAL14ACGLGALGLUSIDb               | MMgallsgalsgkpgal4acgpgphside_h[b] <=><br>MMgallsgalsgkpgal4acgpgphside_h[c]                     | -1000 | 1000 |  | Moose secretion to outlet (body fluids) |
| MMEX_galsgalsgalsgkpgalsgkpgal4acgpgphside_h[c]b | MMgalsgalsgalsgkpgalsgkpgal4acgpgphside_h[b] <=>                                                 | 0     | 1000 |  | Moose secretion to outlet (body fluids) |
| MMGALGALFUCGALACGLGALACGLGAL14ACGLGALGLUSIDb     | MMgalsgalsgalsgkpgalsgkpgal4acgpgphside_h[b] <=><br>MMgalsgalsgalsgkpgalsgkpgal4acgpgphside_h[c] | -1000 | 1000 |  | Moose secretion to outlet (body fluids) |
| MMEX_galsgalsgalsgkpgalsgkpgal4acgpgphside_h[c]b | MMgalsgalsgalsgkpgalsgkpgal4acgpgphside_h[b] <=>                                                 | 0     | 1000 |  | Moose secretion to outlet (body fluids) |
| MMGALGALGALTICRMb                                | MMgalsgalsgalsgkpgalsgkpgal4acgpgphside_h[b] <=>                                                 | 0     | 1000 |  | Moose secretion to outlet (body fluids) |
| MMEX_ganc[c]b                                    | MMgan[b] <=>                                                                                     | 0     | 1000 |  | Moose secretion to outlet (body fluids) |
| MMGAM1b                                          | MMgan[b] <=> MMgan[c]                                                                            | -1000 | 1000 |  | Moose secretion to outlet (body fluids) |
| MMEX_gnside_h[c]b                                | MMgnside_h[b] <=>                                                                                | 0     | 1000 |  | Moose secretion to outlet (body fluids) |
| MMGBSIDb                                         | MMgnside_h[c] <=> MMgnside_h[b]                                                                  | -1000 | 1000 |  | Moose secretion to outlet (body fluids) |
| MMEX_gns[c]b                                     | MMgns[c] <=>                                                                                     | 0     | 1000 |  | Moose secretion to outlet (body fluids) |
| MMGCHOLAusb                                      | MMb2[c] + MMgan[c] + MMgns[c] -> MMgal[c] + MMfc[c] + MMfc[c] + MMgns[c]                         | 0     | 1000 |  | Moose secretion to outlet (body fluids) |
| MMGCHOLAusb                                      | MMgchola[b] <=> MMgchola[c]                                                                      | -1000 | 1000 |  | Moose secretion to outlet (body fluids) |
| MMEX_gtlb2_h[c]b                                 | MMgtlb2_h[b] <=>                                                                                 | 0     | 1000 |  | Moose secretion to outlet (body fluids) |
| MMGDIb2b                                         | MMgtlb2_h[c] <=> MMgtlb2_h[b]                                                                    | -1000 | 1000 |  | Moose secretion to outlet (body fluids) |
| MMEX_gtlc_h[c]b                                  | MMgtlc_h[b] <=>                                                                                  | 0     | 1000 |  | Moose secretion to outlet (body fluids) |
| MMGDIcb                                          | MMgtlc_h[c] <=> MMgtlc_h[b]                                                                      | -1000 | 1000 |  | Moose secretion to outlet (body fluids) |
| MMEX_gkchola[c]b                                 | MMgkchola[b] <=>                                                                                 | 0     | 1000 |  | Moose secretion to outlet (body fluids) |
| MMGDCHOLAusb                                     | MMgkchola[b] <=> MMgkchola[c]                                                                    | -1000 | 1000 |  | Moose secretion to outlet (body fluids) |
| MMEX_glp[c]b                                     | MMglp[b] <=>                                                                                     | 0     | 1000 |  | Moose secretion to outlet (body fluids) |
| MMEX_gkar[c]b                                    | MMgkar[b] <=>                                                                                    | 0     | 1000 |  | Moose secretion to outlet (body fluids) |
| MMGLCURb                                         | MMgkar[c] -> MMgkar[b]                                                                           | 0     | 1000 |  | Moose secretion to outlet (body fluids) |
| MMEX_gshs[c]b                                    | MMghsh[b] <=>                                                                                    | 0     | 1000 |  | Moose secretion to outlet (body fluids) |
| MMGLUCb                                          | MMghsh[b] -> MMghsh_L[c] + MM5oxp[c]                                                             | 0     | 1000 |  | Moose secretion to outlet (body fluids) |
| MMEX_gsh[c]b                                     | MMghsh[b] <=>                                                                                    | 0     | 1000 |  | Moose secretion to outlet (body fluids) |

|                       |                                                                                       |       |      |  |                                         |
|-----------------------|---------------------------------------------------------------------------------------|-------|------|--|-----------------------------------------|
| MMEX_gly(e)b          | MMgly(b) <=>                                                                          | 0     | 1000 |  | Mouse secretion to outlet (body fluids) |
| MMGLYCb               | MMgly(c) <=> MMgly(c)b                                                                | -1000 | 1000 |  | Mouse secretion to outlet (body fluids) |
| MMEX_glyc_S(e)b       | MMglyc_S(b) <=>                                                                       | 0     | 1000 |  | Mouse secretion to outlet (body fluids) |
| MMGLYc_S(b)           | MMglyc_S(c) -> MMglyc_S(b)                                                            | 0     | 1000 |  | Mouse secretion to outlet (body fluids) |
| MMEX_glyhy(e)b        | MMglyhy(b) <=>                                                                        | 0     | 1000 |  | Mouse secretion to outlet (body fluids) |
| MMEX_glype(e)b        | MMglype(b) <=>                                                                        | 0     | 1000 |  | Mouse secretion to outlet (body fluids) |
| MMEX_glyku(e)b        | MMglyku(b) <=>                                                                        | 0     | 1000 |  | Mouse secretion to outlet (body fluids) |
| MMEX_glyh(e)b         | MMglyh(b) <=>                                                                         | 0     | 1000 |  | Mouse secretion to outlet (body fluids) |
| MMEX_glypro(e)b       | MMglypro(b) <=>                                                                       | 0     | 1000 |  | Mouse secretion to outlet (body fluids) |
| MMEX_glysar(e)b       | MMglysar(b) <=>                                                                       | 0     | 1000 |  | Mouse secretion to outlet (body fluids) |
| MMEX_gmp(e)b          | MMgmp(b) <=>                                                                          | 0     | 1000 |  | Mouse secretion to outlet (body fluids) |
| MMEX_gmcor1(e)b       | MMgmcor1(b) <=>                                                                       | 0     | 1000 |  | Mouse secretion to outlet (body fluids) |
| MMGNCORE1(b)          | MMgmcor1(g) -> MMgmcor1(b)                                                            | 0     | 1000 |  | Mouse secretion to outlet (body fluids) |
| MMEX_gmcor2(e)b       | MMgmcor2(b) <=>                                                                       | 0     | 1000 |  | Mouse secretion to outlet (body fluids) |
| MMGNCORE2(b)          | MMgmcor2(g) -> MMgmcor2(b)                                                            | 0     | 1000 |  | Mouse secretion to outlet (body fluids) |
| MMEX_gm1c_h(e)b       | MMgm1c_h(b) <=>                                                                       | 0     | 1000 |  | Mouse secretion to outlet (body fluids) |
| MMGP1Ceb              | MMgm1c_h(c) <=> MMgm1c_h(b)                                                           | -1000 | 1000 |  | Mouse secretion to outlet (body fluids) |
| MMEX_gp1calpha_h(e)b  | MMgp1calpha_h(b) <=>                                                                  | 0     | 1000 |  | Mouse secretion to outlet (body fluids) |
| MMGP1CALPHA(b)        | MMgp1calpha_h(c) <=> MMgp1calpha_h(b)                                                 | -1000 | 1000 |  | Mouse secretion to outlet (body fluids) |
| MMEX_gq1b_h(e)b       | MMgq1b_h(b) <=>                                                                       | 0     | 1000 |  | Mouse secretion to outlet (body fluids) |
| MMGQ1H(b)             | MMgq1b_h(c) <=> MMgq1b_h(b)                                                           | -1000 | 1000 |  | Mouse secretion to outlet (body fluids) |
| MMEX_gq1b1alpha_h(e)b | MMgq1b1alpha_h(b) <=>                                                                 | 0     | 1000 |  | Mouse secretion to outlet (body fluids) |
| MMGQ1HALPHA(b)        | MMgq1b1alpha_h(c) <=> MMgq1b1alpha_h(b)                                               | -1000 | 1000 |  | Mouse secretion to outlet (body fluids) |
| MMEX_gsa(e)b          | MMgsa(b) <=>                                                                          | 0     | 1000 |  | Mouse secretion to outlet (body fluids) |
| MMGS(b)               | MMgsa(b) <=> MMgsa(c)                                                                 | -1000 | 1000 |  | Mouse secretion to outlet (body fluids) |
| MMEX_g1a_h(e)b        | MMg1a_h(b) <=>                                                                        | 0     | 1000 |  | Mouse secretion to outlet (body fluids) |
| MMGT1a(b)             | MMg1a_h(c) <=> MMg1a_h(b)                                                             | -1000 | 1000 |  | Mouse secretion to outlet (body fluids) |
| MMEX_gth(e)b          | MMgth(b) <=>                                                                          | 0     | 1000 |  | Mouse secretion to outlet (body fluids) |
| MMEX_gth(e)b          | MMgth(b) <=>                                                                          | 0     | 1000 |  | Mouse secretion to outlet (body fluids) |
| MMEX_gpe(e)b          | MMgpe(b) <=>                                                                          | 0     | 1000 |  | Mouse secretion to outlet (body fluids) |
| MMEX_gsa(e)b          | MMgsa(b) <=>                                                                          | 0     | 1000 |  | Mouse secretion to outlet (body fluids) |
| MMGLA(b)              | MMgsa(b) <=> MMgsa(c)                                                                 | -1000 | 1000 |  | Mouse secretion to outlet (body fluids) |
| MMEX_gm(e)b           | MMgm(b) <=>                                                                           | 0     | 1000 |  | Mouse secretion to outlet (body fluids) |
| MMEX_gmukhu(e)b       | MMgmukhu(b) <=>                                                                       | 0     | 1000 |  | Mouse secretion to outlet (body fluids) |
| MMEX_gmgcho(e)b       | MMgmugcho(b) <=>                                                                      | 0     | 1000 |  | Mouse secretion to outlet (body fluids) |
| MMEX_gmcho(e)b        | MMgmukcho(b) <=>                                                                      | 0     | 1000 |  | Mouse secretion to outlet (body fluids) |
| MMEX_h2o2(e)b         | MMh2o2(b) <=>                                                                         | 0     | 1000 |  | Mouse secretion to outlet (body fluids) |
| MMH2O2(b)             | MMh2o2(b) <=> MMh2o2(c)                                                               | -1000 | 1000 |  | Mouse secretion to outlet (body fluids) |
| MMEX_h(e)b            | MMha(b) <=>                                                                           | 0     | 1000 |  | Mouse secretion to outlet (body fluids) |
| MMHAS2(b)             | MMha(gm(c) + MMadp(g(c) + MMha_pre1(b) -> 2 MMh(c) + 2 MMh(g(c) + MMha(b)             | 0     | 1000 |  | Mouse secretion to outlet (body fluids) |
| MMHA(b)               | MMha(b) -> MMha(l)                                                                    | 0     | 1000 |  | Mouse secretion to outlet (body fluids) |
| MMEX_ha_pre1(e)b      | MMha_pre1(b) <=>                                                                      | 0     | 1000 |  | Mouse secretion to outlet (body fluids) |
| MMHAS1(b)             | MMha(gm(c) + MMadp(g(c) -> 2 MMh(c) + 2 MMadp(c) + MMha_pre1(b)                       | 0     | 1000 |  | Mouse secretion to outlet (body fluids) |
| MMEX_hcount(e)b       | MMhcount(b) <=>                                                                       | 0     | 1000 |  | Mouse secretion to outlet (body fluids) |
| MMHCOUMARIN(b)        | MMhcount(b) <=> MMhcount(c)                                                           | -1000 | 1000 |  | Mouse secretion to outlet (body fluids) |
| MMEX_hda(e)b          | MMhda(b) <=>                                                                          | 0     | 1000 |  | Mouse secretion to outlet (body fluids) |
| MMHDCA(b)             | MMhda(b) <=> MMhda(c)                                                                 | -1000 | 1000 |  | Mouse secretion to outlet (body fluids) |
| MMEX_hde(e)b          | MMhde(b) <=>                                                                          | 0     | 1000 |  | Mouse secretion to outlet (body fluids) |
| MMHDCEA(b)            | MMhde(b) <=> MMhde(c)                                                                 | -1000 | 1000 |  | Mouse secretion to outlet (body fluids) |
| MMEX_hcount(e)b       | MMhcount(b) <=>                                                                       | 0     | 1000 |  | Mouse secretion to outlet (body fluids) |
| MMHISTRATROL(b)       | MMhcount(c) <=> MMhcount(b)                                                           | -1000 | 1000 |  | Mouse secretion to outlet (body fluids) |
| MMEX_hesc(e)b         | MMhes(b) <=>                                                                          | 0     | 1000 |  | Mouse secretion to outlet (body fluids) |
| MMHESC(b)             | MMhes(b) <=> MMhes(c)                                                                 | -1000 | 1000 |  | Mouse secretion to outlet (body fluids) |
| MMEX_hc_L(e)b         | MMhs_L(b) <=>                                                                         | 0     | 1000 |  | Mouse secretion to outlet (body fluids) |
| MMHSCAT(b)            | MMhs_L(c) <=> MMhs_L(b)                                                               | -1000 | 1000 |  | Mouse secretion to outlet (body fluids) |
| MMHSD(b)              | MMhs_L(b) -> MMhs_L(c)                                                                | 0     | 1000 |  | Mouse secretion to outlet (body fluids) |
| MMEX_his(e)b          | MMhis(b) <=>                                                                          | 0     | 1000 |  | Mouse secretion to outlet (body fluids) |
| MMHISTAVESHC(b)       | 2 MMh2o(c) + 2 MMadp(c) + 3 MMhes(c) -> 2 MMadp(c) + 2 MMh(c) + 2 MMh(g) + 3 MMhis(b) | 0     | 1000 |  | Mouse secretion to outlet (body fluids) |
| MMHSTA(b)             | MMhis(b) <=> MMhis(c)                                                                 | -1000 | 1000 |  | Mouse secretion to outlet (body fluids) |
| MMEX_hm_L(e)b         | MMhm_L(b) <=>                                                                         | 0     | 1000 |  | Mouse secretion to outlet (body fluids) |
| MMEX_hpd(e)b          | MMhpd(b) <=>                                                                          | 0     | 1000 |  | Mouse secretion to outlet (body fluids) |
| MMHPDCA(b)            | MMhpd(b) <=> MMhpd(c)                                                                 | -1000 | 1000 |  | Mouse secretion to outlet (body fluids) |
| MMEX_hpg(e)b          | MMhpg(b) <=>                                                                          | 0     | 1000 |  | Mouse secretion to outlet (body fluids) |
| MMHSPC(b)             | MMhpg(g) -> MMhpg(b)                                                                  | 0     | 1000 |  | Mouse secretion to outlet (body fluids) |
| MMHSPG(b)             | MMhpg(b) -> MMhpg(l)                                                                  | 0     | 1000 |  | Mouse secretion to outlet (body fluids) |
| MMEX_hsu(e)b          | MMhsu(b) <=>                                                                          | 0     | 1000 |  | Mouse secretion to outlet (body fluids) |
| MMHITAXOL(b)          | MMhsu(b) <=> MMhsu(c)                                                                 | -1000 | 1000 |  | Mouse secretion to outlet (body fluids) |
| MMEX_hsu(e)b          | MMhsu(b) <=>                                                                          | 0     | 1000 |  | Mouse secretion to outlet (body fluids) |
| MMHYX(b)              | MMhsu(b) <=> MMhsu(c)                                                                 | -1000 | 1000 |  | Mouse secretion to outlet (body fluids) |
| MMEX_idp(e)b          | MMidp(b) <=>                                                                          | 0     | 1000 |  | Mouse secretion to outlet (body fluids) |
| MMEX_ipp(e)b          | MMipp(b) <=>                                                                          | 0     | 1000 |  | Mouse secretion to outlet (body fluids) |
| MMEX_inos(e)b         | MMinos(b) <=>                                                                         | 0     | 1000 |  | Mouse secretion to outlet (body fluids) |
| MMEX_ks(e)b           | MMks(b) <=>                                                                           | 0     | 1000 |  | Mouse secretion to outlet (body fluids) |
| MMKS(b)               | MMks(g) -> MMks(b)                                                                    | 0     | 1000 |  | Mouse secretion to outlet (body fluids) |
| MMKS(b)               | MMks(b) -> MMks(l)                                                                    | 0     | 1000 |  | Mouse secretion to outlet (body fluids) |
| MMEX_ks_deg1(e)b      | MMks_deg1(b) <=>                                                                      | 0     | 1000 |  | Mouse secretion to outlet (body fluids) |
| MMEX_ks_core2(e)b     | MMks_core2(b) <=>                                                                     | 0     | 1000 |  | Mouse secretion to outlet (body fluids) |
| MMKSIL_CORE2(b)       | MMks_core2(g) -> MMks_core2(b)                                                        | 0     | 1000 |  | Mouse secretion to outlet (body fluids) |
| MMKSIL_CORE2(b)       | MMks_core2(b) -> MMks_core2(l)                                                        | 0     | 1000 |  | Mouse secretion to outlet (body fluids) |
| MMEX_ks_core4(e)b     | MMks_core4(b) <=>                                                                     | 0     | 1000 |  | Mouse secretion to outlet (body fluids) |
| MMKSIL_CORE4(b)       | MMks_core4(g) -> MMks_core4(b)                                                        | 0     | 1000 |  | Mouse secretion to outlet (body fluids) |
| MMKSIL_CORE4(b)       | MMks_core4(b) -> MMks_core4(l)                                                        | 0     | 1000 |  | Mouse secretion to outlet (body fluids) |
| MMEX_ks_L(e)b         | MMks_L(b) <=>                                                                         | 0     | 1000 |  | Mouse secretion to outlet (body fluids) |
| MMEX_ks(e)b           | MMks(b) <=>                                                                           | 0     | 1000 |  | Mouse secretion to outlet (body fluids) |
| MMELCT(b)             | MMks(g) -> MMks(b)                                                                    | 0     | 1000 |  | Mouse secretion to outlet (body fluids) |

|                    |                                                                                    |       |      |  |                                         |
|--------------------|------------------------------------------------------------------------------------|-------|------|--|-----------------------------------------|
| MMEX_lu_L(c)b      | MMlu_L(b) <=>                                                                      | 0     | 1000 |  | Moose secretion to outlet (body fluids) |
| MMLEL3usb          | MMlu_L(b) <=> MMlu_L(c)                                                            | -1000 | 1000 |  | Moose secretion to outlet (body fluids) |
| MMMETTL3usb        | MMlu_L(c) + MMlu_L(b) -> MMlu_L(c) + MMlu_L(b)                                     | 0     | 1000 |  | Moose secretion to outlet (body fluids) |
| MMEX_luph(c)b      | MMluph(b) <=>                                                                      | 0     | 1000 |  | Moose secretion to outlet (body fluids) |
| MMEX_kakrA4(c)b    | MMkukrA4(b) <=>                                                                    | 0     | 1000 |  | Moose secretion to outlet (body fluids) |
| MMLEUKTR4ab        | MMkukrA4(b) <=> MMkukrA4(c)                                                        | -1000 | 1000 |  | Moose secretion to outlet (body fluids) |
| MMEX_kakrB4(c)b    | MMkukrB4(b) <=>                                                                    | 0     | 1000 |  | Moose secretion to outlet (body fluids) |
| MMLEUKTRB4b        | MMkukrB4(b) <=> MMkukrB4(c)                                                        | -1000 | 1000 |  | Moose secretion to outlet (body fluids) |
| MMEX_kakrC4(c)b    | MMkukrC4(b) <=>                                                                    | 0     | 1000 |  | Moose secretion to outlet (body fluids) |
| MMEX_kakrD4(c)b    | MMkukrD4(b) <=>                                                                    | 0     | 1000 |  | Moose secretion to outlet (body fluids) |
| MMLEUKTRD4b        | MMkukrD4(b) <=> MMkukrD4(c)                                                        | -1000 | 1000 |  | Moose secretion to outlet (body fluids) |
| MMEX_kakrE4(c)b    | MMkukrE4(b) <=>                                                                    | 0     | 1000 |  | Moose secretion to outlet (body fluids) |
| MMLEUKTRE4b        | MMkukrE4(b) <=> MMkukrE4(c)                                                        | -1000 | 1000 |  | Moose secretion to outlet (body fluids) |
| MMEX_kakrF4(c)b    | MMkukrF4(b) <=>                                                                    | 0     | 1000 |  | Moose secretion to outlet (body fluids) |
| MMLEUKTRF4b        | MMkukrF4(b) <=> MMkukrF4(c)                                                        | -1000 | 1000 |  | Moose secretion to outlet (body fluids) |
| MMEX_kakr(c)b      | MMkukr(b) <=>                                                                      | 0     | 1000 |  | Moose secretion to outlet (body fluids) |
| MMEX_lgc(c)b       | MMlgc(b) <=>                                                                       | 0     | 1000 |  | Moose secretion to outlet (body fluids) |
| MMLGNCb            | MMlgc(b) <=> MMlgc(c)                                                              | -1000 | 1000 |  | Moose secretion to outlet (body fluids) |
| MMEX_fmnc(c)b      | MMfmnc(b) <=>                                                                      | 0     | 1000 |  | Moose secretion to outlet (body fluids) |
| MMLMNENab          | MMfmnc(b) <=> MMfmnc(c)                                                            | -1000 | 1000 |  | Moose secretion to outlet (body fluids) |
| MMEX_lpsac(c)b     | MMlpsac(b) <=>                                                                     | 0     | 1000 |  | Moose secretion to outlet (body fluids) |
| MMEX_hack(c)b      | MMhack(b) <=>                                                                      | 0     | 1000 |  | Moose secretion to outlet (body fluids) |
| MMLNELCcb          | MMhack(b) <=> MMhack(c)                                                            | -1000 | 1000 |  | Moose secretion to outlet (body fluids) |
| MMEX_hk(c)b        | MMhk(b) <=>                                                                        | 0     | 1000 |  | Moose secretion to outlet (body fluids) |
| MMNLNCb            | MMhk(b) <=> MMhk(c)                                                                | -1000 | 1000 |  | Moose secretion to outlet (body fluids) |
| MMEX_hkac(c)b      | MMhkac(b) <=>                                                                      | 0     | 1000 |  | Moose secretion to outlet (body fluids) |
| MMNLNLCab          | MMhkac(b) <=> MMhkac(c)                                                            | -1000 | 1000 |  | Moose secretion to outlet (body fluids) |
| MMEX_hkag(c)b      | MMhkag(b) <=>                                                                      | 0     | 1000 |  | Moose secretion to outlet (body fluids) |
| MMNLNLCGb          | MMhkag(b) <=> MMhkag(c)                                                            | -1000 | 1000 |  | Moose secretion to outlet (body fluids) |
| MMEX_hchoLac(b)    | MMhchoLac(b) <=>                                                                   | 0     | 1000 |  | Moose secretion to outlet (body fluids) |
| MMLPCHOAb          | MMpchoLac(b) <=> MMpchoLac(c)                                                      | -1000 | 1000 |  | Moose secretion to outlet (body fluids) |
| MMEX_mag_h(c)b     | MMmag_h(b) <=>                                                                     | 0     | 1000 |  | Moose secretion to outlet (body fluids) |
| MMMAGab            | MMmag_h(b) <=> MMmag_h(c)                                                          | -1000 | 1000 |  | Moose secretion to outlet (body fluids) |
| MMEX_mak(c)b       | MMmak(b) <=>                                                                       | 0     | 1000 |  | Moose secretion to outlet (body fluids) |
| MMMALT1rb          | MMmak(b) <=> MMmak(c)                                                              | -1000 | 1000 |  | Moose secretion to outlet (body fluids) |
| MMEX_makr(c)b      | MMmakr(b) <=>                                                                      | 0     | 1000 |  | Moose secretion to outlet (body fluids) |
| MMEX_muc(c)b       | MMmuc(b) <=>                                                                       | 0     | 1000 |  | Moose secretion to outlet (body fluids) |
| MMMAN1rb           | MMmuc(b) <=> MMmuc(c)                                                              | -1000 | 1000 |  | Moose secretion to outlet (body fluids) |
| MMEX_meh(c)b       | MMmeh(b) <=>                                                                       | 0     | 1000 |  | Moose secretion to outlet (body fluids) |
| MMMEOR2b           | MMmeh(b) <=> MMmeh(c)                                                              | -1000 | 1000 |  | Moose secretion to outlet (body fluids) |
| MMEX_mup(c)b       | MMmup(b) <=>                                                                       | 0     | 1000 |  | Moose secretion to outlet (body fluids) |
| MMMPFVIES5b        | 2 MMbz(c) + 2 MMup(c) + 3 MMup(c) -> 2 MMup(c) + 2 MMbz(c) + 2 MMbz(c) + 3 MMup(b) | 0     | 1000 |  | Moose secretion to outlet (body fluids) |
| MMEX_muph(c)b      | MMmuph(b) <=>                                                                      | 0     | 1000 |  | Moose secretion to outlet (body fluids) |
| MMMERPLACCY5b      | MMmuph(c) -> MMmuph(c)                                                             | 0     | 1000 |  | Moose secretion to outlet (body fluids) |
| MMEX_mel_L(c)b     | MMmel_L(b) <=>                                                                     | 0     | 1000 |  | Moose secretion to outlet (body fluids) |
| MMMET3cb           | MMmel_L(b) <=> MMmel_L(c)                                                          | -1000 | 1000 |  | Moose secretion to outlet (body fluids) |
| MMEX_mpl0(c)b      | MMmpl0(b) <=>                                                                      | 0     | 1000 |  | Moose secretion to outlet (body fluids) |
| MMMK10b            | MMmpl0(c) <=> MMmpl0(b)                                                            | -1000 | 1000 |  | Moose secretion to outlet (body fluids) |
| MMEX_mpl1(c)b      | MMmpl1(b) <=>                                                                      | 0     | 1000 |  | Moose secretion to outlet (body fluids) |
| MMMK11b            | MMmpl1(c) <=> MMmpl1(b)                                                            | -1000 | 1000 |  | Moose secretion to outlet (body fluids) |
| MMEX_mpl7(c)b      | MMmpl7(b) <=>                                                                      | 0     | 1000 |  | Moose secretion to outlet (body fluids) |
| MMMK7b             | MMmpl7(c) <=> MMmpl7(b)                                                            | -1000 | 1000 |  | Moose secretion to outlet (body fluids) |
| MMEX_mpl8(c)b      | MMmpl8(b) <=>                                                                      | 0     | 1000 |  | Moose secretion to outlet (body fluids) |
| MMMK8b             | MMmpl8(c) <=> MMmpl8(b)                                                            | -1000 | 1000 |  | Moose secretion to outlet (body fluids) |
| MMEX_mpl9(c)b      | MMmpl9(b) <=>                                                                      | 0     | 1000 |  | Moose secretion to outlet (body fluids) |
| MMMK9b             | MMmpl9(c) <=> MMmpl9(b)                                                            | -1000 | 1000 |  | Moose secretion to outlet (body fluids) |
| MMEX_mplg(c)b      | MMmplg(b) <=>                                                                      | 0     | 1000 |  | Moose secretion to outlet (body fluids) |
| MMMTG2XAb          | MMmplg(c) -> MMmplg(b)                                                             | 0     | 1000 |  | Moose secretion to outlet (body fluids) |
| MMEX_m2m2mus(c)b   | MMm2m2mus(b) <=>                                                                   | 0     | 1000 |  | Moose secretion to outlet (body fluids) |
| MMN2M2MASNb        | MMm2m2mus(g) -> MMm2m2mus(b)                                                       | 0     | 1000 |  | Moose secretion to outlet (body fluids) |
| MMN2M2MASNdyb      | MMm2m2mus(b) -> MMm2m2mus(l)                                                       | 0     | 1000 |  | Moose secretion to outlet (body fluids) |
| MMEX_muc(c)b       | MMmuc(b) <=>                                                                       | 0     | 1000 |  | Moose secretion to outlet (body fluids) |
| MMNACTab           | MMmuc(c) -> MMmuc(b)                                                               | 0     | 1000 |  | Moose secretion to outlet (body fluids) |
| MMNACTPb           | MMmuc(b) -> MMmuc(c)                                                               | 0     | 1000 |  | Moose secretion to outlet (body fluids) |
| MMEX_mud(c)b       | MMmud(b) <=>                                                                       | 0     | 1000 |  | Moose secretion to outlet (body fluids) |
| MMEX_mud(c)b       | MMmud(b) <=>                                                                       | 0     | 1000 |  | Moose secretion to outlet (body fluids) |
| MMEX_mcam(c)b      | MMmcam(b) <=>                                                                      | 0     | 1000 |  | Moose secretion to outlet (body fluids) |
| MMNCAMDeb          | MMmcam(c) -> MMmcam(b)                                                             | 0     | 1000 |  | Moose secretion to outlet (body fluids) |
| MMNCAMUPb          | MMmcam(b) -> MMmcam(c)                                                             | 0     | 1000 |  | Moose secretion to outlet (body fluids) |
| MMEX_micdipine(c)b | MMmicdipine(b) <=>                                                                 | 0     | 1000 |  | Moose secretion to outlet (body fluids) |
| MMNPF2P2NFlab      | MMmicdipine(b) <=> MMmicdipine(c)                                                  | -1000 | 1000 |  | Moose secretion to outlet (body fluids) |
| MMEX_m(c)b         | MMm(b) <=>                                                                         | 0     | 1000 |  | Moose secretion to outlet (body fluids) |
| MMNOab             | MMm(b) <=> MMm(c)                                                                  | -1000 | 1000 |  | Moose secretion to outlet (body fluids) |
| MMEX_mpl(c)b       | MMmpl(b) <=>                                                                       | 0     | 1000 |  | Moose secretion to outlet (body fluids) |
| MMNPFH3ab          | MMmpl(b) <=> MMmpl(c)                                                              | -1000 | 1000 |  | Moose secretion to outlet (body fluids) |
| MMEX_muph(c)b      | MMmuph(b) <=>                                                                      | 0     | 1000 |  | Moose secretion to outlet (body fluids) |
| MMNRPPIRVESIECb    | MMbz(c) + MMup(c) + MMuph(c) -> MMup(c) + 2 MMbz(c) + MMbz(c) + MMuph(b)           | 0     | 1000 |  | Moose secretion to outlet (body fluids) |
| MMNRPPIRFlab       | MMmuph(b) <=> MMmuph(c)                                                            | -1000 | 1000 |  | Moose secretion to outlet (body fluids) |
| MMEX_muph(c)b      | MMmuph(b) <=>                                                                      | 0     | 1000 |  | Moose secretion to outlet (body fluids) |
| MMNRPPIRFSb        | MMmuph(c) -> MMmuph(b)                                                             | 0     | 1000 |  | Moose secretion to outlet (body fluids) |
| MMEX_mvnc(c)b      | MMmvnc(b) <=>                                                                      | 0     | 1000 |  | Moose secretion to outlet (body fluids) |
| MMNRVNCb           | MMmvnc(b) <=> MMmvnc(c)                                                            | -1000 | 1000 |  | Moose secretion to outlet (body fluids) |
| MMEX_a2(c)b        | MMa2(b) <=>                                                                        | -100  | 1000 |  | Moose secretion to outlet (body fluids) |
| MMO2b              | MMa2(b) <=> MMa2(c)                                                                | -1000 | 1000 |  | Moose secretion to outlet (body fluids) |
| MMEX_a2(c)b        | MMa2(b) <=>                                                                        | 0     | 1000 |  | Moose secretion to outlet (body fluids) |

|                      |                                                                           |       |      |  |                                         |
|----------------------|---------------------------------------------------------------------------|-------|------|--|-----------------------------------------|
| MMO2Ssb              | MMo2d[c] <=> MMo2d[b]                                                     | -1000 | 1000 |  | Moose secretion to outlet (body fluids) |
| MMEX_ogt3_hsteb      | MMogt3_hstb <=>                                                           | 0     | 1000 |  | Moose secretion to outlet (body fluids) |
| MMOAGD3eb            | MMogt3_hst[c] <=> MMogt3_hst[b]                                           | -1000 | 1000 |  | Moose secretion to outlet (body fluids) |
| MMEX_ogt3_hsteb      | MMogt3_hstb <=>                                                           | 0     | 1000 |  | Moose secretion to outlet (body fluids) |
| MMOAGT7eb            | MMogt3_hst[c] <=> MMogt3_hst[b]                                           | -1000 | 1000 |  | Moose secretion to outlet (body fluids) |
| MMEX_ocdaeyb         | MMocda[b] <=>                                                             | 0     | 1000 |  | Moose secretion to outlet (body fluids) |
| MMOCCDArb            | MMocda[b] <=> MMocda[c]                                                   | -1000 | 1000 |  | Moose secretion to outlet (body fluids) |
| MMEX_ocdaeyb         | MMocda[b] <=>                                                             | 0     | 1000 |  | Moose secretion to outlet (body fluids) |
| MMOCCDArb            | MMocda[b] <=> MMocda[c]                                                   | -1000 | 1000 |  | Moose secretion to outlet (body fluids) |
| MMEX_ocstaeyb        | MMocsta[b] <=>                                                            | 0     | 1000 |  | Moose secretion to outlet (body fluids) |
| MMOCTAb              | MMocsta[b] <=> MMocsta[c]                                                 | -1000 | 1000 |  | Moose secretion to outlet (body fluids) |
| MMEX_omeprazoleyb    | MMomeprazole[b] <=>                                                       | 0     | 1000 |  | Moose secretion to outlet (body fluids) |
| MMOMEPRAGOLEeb       | MMomeprazole[b] <=> MMomeprazole[c]                                       | -1000 | 1000 |  | Moose secretion to outlet (body fluids) |
| MMEX_omp4eyb         | MMomp4[b] <=>                                                             | 0     | 1000 |  | Moose secretion to outlet (body fluids) |
| MMONP7HLab           | MMomp4[b] <=> MMomp4[c]                                                   | -1000 | 1000 |  | Moose secretion to outlet (body fluids) |
| MMEX_omcayb          | MMom[b] <=>                                                               | 0     | 1000 |  | Moose secretion to outlet (body fluids) |
| MMORNb               | MMom[b] <=> MMom[c]                                                       | -1000 | 1000 |  | Moose secretion to outlet (body fluids) |
| MMEX_paf_hsteb       | MMpaf_hstb <=>                                                            | 0     | 1000 |  | Moose secretion to outlet (body fluids) |
| MMPAFb               | MMpaf_hstb <=> MMpaf_hst[c]                                               | -1000 | 1000 |  | Moose secretion to outlet (body fluids) |
| MMEX_pchol_hsteb     | MMpchol_hstb <=>                                                          | 0     | 1000 |  | Moose secretion to outlet (body fluids) |
| MMPCHOLISTHDb        | MMpchol_hst[c] -> MMpchol_hst[b]                                          | 0     | 1000 |  | Moose secretion to outlet (body fluids) |
| MMPCb                | MMb2[c] + MMpchl[c] + MMpchol_hst[c] <=> MMpchl[c] + MMb[c] + MMpchl_hstb | -1000 | 1000 |  | Moose secretion to outlet (body fluids) |
| MMEX_pe_hsteb        | MMpe_hstb <=>                                                             | 0     | 1000 |  | Moose secretion to outlet (body fluids) |
| MMPEFLPb             | MMb2[c] + MMpchl[c] + MMpchl_hstb -> MMpchl[c] + MMb[c] + MMpchl_hstb     | 0     | 1000 |  | Moose secretion to outlet (body fluids) |
| MMPEb                | MMpe_hstb <=> MMpe_hst[c]                                                 | -1000 | 1000 |  | Moose secretion to outlet (body fluids) |
| MMEX_pescayb         | MMpesc[b] <=>                                                             | 0     | 1000 |  | Moose secretion to outlet (body fluids) |
| MMEX_pemducheyb      | MMpemduch[b] <=>                                                          | 0     | 1000 |  | Moose secretion to outlet (body fluids) |
| MMEX_pestingcholeyb  | MMpestingch[b] <=>                                                        | 0     | 1000 |  | Moose secretion to outlet (body fluids) |
| MMEX_pemducheyb      | MMpemduch[b] <=>                                                          | 0     | 1000 |  | Moose secretion to outlet (body fluids) |
| MMEX_pepbeyb         | MMpepb[b] <=>                                                             | 0     | 1000 |  | Moose secretion to outlet (body fluids) |
| MMPEPLYSub           | MMpepb[b] <=> MMpepb[a]                                                   | -1000 | 1000 |  | Moose secretion to outlet (body fluids) |
| MMEX_perbheyb        | MMperb[b] <=>                                                             | 0     | 1000 |  | Moose secretion to outlet (body fluids) |
| MMPERHLYLab          | MMperb[b] <=> MMperb[c]                                                   | -1000 | 1000 |  | Moose secretion to outlet (body fluids) |
| MMEX_pgbyc_hsteb     | MMgbyc_hstb <=>                                                           | 0     | 1000 |  | Moose secretion to outlet (body fluids) |
| MMPGLYCb             | MMgbyc_hstb <=> MMgbyc_hst[c]                                             | -1000 | 1000 |  | Moose secretion to outlet (body fluids) |
| MMEX_phacgheyb       | MMphacghe[b] <=>                                                          | 0     | 1000 |  | Moose secretion to outlet (body fluids) |
| MMPEHACCLNb          | MMphacghe[c] <=> MMphacghe[b]                                             | -1000 | 1000 |  | Moose secretion to outlet (body fluids) |
| MMEX_phemeyb         | MMphem[b] <=>                                                             | 0     | 1000 |  | Moose secretion to outlet (body fluids) |
| MMPIHEMeb            | MMphem[b] -> MMphem[c]                                                    | 0     | 1000 |  | Moose secretion to outlet (body fluids) |
| MMEX_phyQeyb         | MMphyQ[b] <=>                                                             | 0     | 1000 |  | Moose secretion to outlet (body fluids) |
| MMPHYQb              | MMb2[c] + MMpchl[c] + MMpchl_hstb -> MMpchl[c] + MMb[c] + MMpchl_hstb     | 0     | 1000 |  | Moose secretion to outlet (body fluids) |
| MMVITKAb             | MMphyQ[c] -> MMphyQ[b]                                                    | 0     | 1000 |  | Moose secretion to outlet (body fluids) |
| MMEX_phyeyb          | MMphy[b] <=>                                                              | 0     | 1000 |  | Moose secretion to outlet (body fluids) |
| MMPHYTb              | MMphy[b] <=> MMphy[c]                                                     | -1000 | 1000 |  | Moose secretion to outlet (body fluids) |
| MMEX_pmo_Ricb        | MMpmo_R[b] <=>                                                            | 0     | 1000 |  | Moose secretion to outlet (body fluids) |
| MMPNTRb              | MMpmo_R[c] -> MMpmo_R[b]                                                  | 0     | 1000 |  | Moose secretion to outlet (body fluids) |
| MMEX_pmpcayb         | MMpmpa[b] <=>                                                             | 0     | 1000 |  | Moose secretion to outlet (body fluids) |
| MMPPAb               | MMpmpa[b] -> MMpmpa[c]                                                    | 0     | 1000 |  | Moose secretion to outlet (body fluids) |
| MMEX_prgamcayb       | MMprgam[b] <=>                                                            | 0     | 1000 |  | Moose secretion to outlet (body fluids) |
| MMPRGSTRNb           | MMprgam[b] <=> MMprgam[c]                                                 | -1000 | 1000 |  | Moose secretion to outlet (body fluids) |
| MMEX_prm_Dicb        | MMpmo_D[b] <=>                                                            | 0     | 1000 |  | Moose secretion to outlet (body fluids) |
| MMEX_prm_Licb        | MMpmo_L[b] <=>                                                            | 0     | 1000 |  | Moose secretion to outlet (body fluids) |
| MMEX_prgbyeb         | MMprgby[b] <=>                                                            | 0     | 1000 |  | Moose secretion to outlet (body fluids) |
| MMEX_prostg2eb       | MMprostg2[b] <=>                                                          | 0     | 1000 |  | Moose secretion to outlet (body fluids) |
| MMEX_prostg1eb       | MMprostg1[b] <=>                                                          | 0     | 1000 |  | Moose secretion to outlet (body fluids) |
| MMPROSTGE1cb         | MMb2[c] + MMpchl[c] + MMprgste1[c] -> MMpchl[c] + MMb[c] + MMpchl_hstb    | 0     | 1000 |  | Moose secretion to outlet (body fluids) |
| MMEX_prostg2eb       | MMprostg2[b] <=>                                                          | 0     | 1000 |  | Moose secretion to outlet (body fluids) |
| MMPROSTGE2cb         | MMprostg2[b] <=> MMprostg2[c]                                             | -1000 | 1000 |  | Moose secretion to outlet (body fluids) |
| MMPROSTGE23b         | MMb2[c] + MMpchl[c] + MMprgste2[c] -> MMpchl[c] + MMb[c] + MMpchl_hstb    | 0     | 1000 |  | Moose secretion to outlet (body fluids) |
| MMEX_prostg2eb       | MMprostg2[b] <=>                                                          | 0     | 1000 |  | Moose secretion to outlet (body fluids) |
| MMPROSTGCF2b         | MMprostg2[b] <=> MMprostg2[c]                                             | -1000 | 1000 |  | Moose secretion to outlet (body fluids) |
| MMEX_pm_hsteb        | MMps_hstb <=>                                                             | 0     | 1000 |  | Moose secretion to outlet (body fluids) |
| MMPSFLPb             | MMb2[c] + MMpchl[c] + MMpchl_hstb -> MMpchl[c] + MMb[c] + MMpchl_hstb     | 0     | 1000 |  | Moose secretion to outlet (body fluids) |
| MMPScb               | MMps_hstb <=> MMps_hst[c]                                                 | -1000 | 1000 |  | Moose secretion to outlet (body fluids) |
| MMEX_psyeyb          | MMpsyb[b] <=>                                                             | 0     | 1000 |  | Moose secretion to outlet (body fluids) |
| MMEX_psykholeyb      | MMpsykhol[b] <=>                                                          | 0     | 1000 |  | Moose secretion to outlet (body fluids) |
| MMEX_psykholeyb      | MMpsykhol[b] <=>                                                          | 0     | 1000 |  | Moose secretion to outlet (body fluids) |
| MMEX_psykholeyb      | MMpsykhol[b] <=>                                                          | 0     | 1000 |  | Moose secretion to outlet (body fluids) |
| MMEX_pskcayb         | MMpska[b] <=>                                                             | 0     | 1000 |  | Moose secretion to outlet (body fluids) |
| MMPTDCAb             | MMpdcab[b] <=> MMpdcab[c]                                                 | -1000 | 1000 |  | Moose secretion to outlet (body fluids) |
| MMEX_pydancayb       | MMpydan[b] <=>                                                            | 0     | 1000 |  | Moose secretion to outlet (body fluids) |
| MMPYDAMArb           | MMpydan[b] <=> MMpydan[c]                                                 | -1000 | 1000 |  | Moose secretion to outlet (body fluids) |
| MMEX_pysbeyb         | MMpyyb[b] <=>                                                             | 0     | 1000 |  | Moose secretion to outlet (body fluids) |
| MMPYDXArb            | MMpydab[b] <=> MMpydab[c]                                                 | -1000 | 1000 |  | Moose secretion to outlet (body fluids) |
| MMEX_pyscayb         | MMpydab[b] <=>                                                            | 0     | 1000 |  | Moose secretion to outlet (body fluids) |
| MMPYDXNb             | MMpydab[b] <=> MMpydab[c]                                                 | -1000 | 1000 |  | Moose secretion to outlet (body fluids) |
| MMEX_pyscayb         | MMpyyb <=>                                                                | 0     | 1000 |  | Moose secretion to outlet (body fluids) |
| MMEX_rnecayb         | MMrnb[b] <=>                                                              | 0     | 1000 |  | Moose secretion to outlet (body fluids) |
| MMRBTrb              | MMrnb[c] -> MMrnb[b]                                                      | 0     | 1000 |  | Moose secretion to outlet (body fluids) |
| MMEX_rnfacyb         | MMrnfab[b] <=>                                                            | 0     | 1000 |  | Moose secretion to outlet (body fluids) |
| MMRETFAb             | MMrnfab[c] -> MMrnfab[b]                                                  | 0     | 1000 |  | Moose secretion to outlet (body fluids) |
| MMEX_reinacayb       | MMreina[b] <=>                                                            | 0     | 1000 |  | Moose secretion to outlet (body fluids) |
| MMRUTb               | MMreina[b] -> MMreina[c]                                                  | 0     | 1000 |  | Moose secretion to outlet (body fluids) |
| MMEX_reinol_9_cicayb | MMreinaol_9_cic[b] <=>                                                    | 0     | 1000 |  | Moose secretion to outlet (body fluids) |
| MMEX_reinol_cw_11eyb | MMreinaol_cw_11[b] <=>                                                    | 0     | 1000 |  | Moose secretion to outlet (body fluids) |

|                                |                                                                                                                                   |       |      |  |                                         |
|--------------------------------|-----------------------------------------------------------------------------------------------------------------------------------|-------|------|--|-----------------------------------------|
| MMEX_rmtc <b>e</b> b           | MMtem <b>[b]</b> <=>                                                                                                              | 0     | 1000 |  | Mouse secretion to outlet (body fluids) |
| MMRET <b>Nb</b>                | MMtem <b>[c]</b> <=> MMtem <b>[b]</b>                                                                                             | -1000 | 1000 |  | Mouse secretion to outlet (body fluids) |
| MMEX_rmtg <b>e</b> b           | MMtemg <b>[b]</b> <=>                                                                                                             | 0     | 1000 |  | Mouse secretion to outlet (body fluids) |
| MMRET <b>GLCb</b>              | MMtemg <b>[c]</b> -> MMtemg <b>[b]</b>                                                                                            | 0     | 1000 |  | Mouse secretion to outlet (body fluids) |
| MMEX_rh_D <b>e</b> b           | MMrb-D <b>[b]</b> <=>                                                                                                             | 0     | 1000 |  | Mouse secretion to outlet (body fluids) |
| MMR <b>l</b> b                 | MMrb-D <b>[b]</b> <=> MMrb-D <b>[c]</b>                                                                                           | -1000 | 1000 |  | Mouse secretion to outlet (body fluids) |
| MMEX_rhb <b>e</b> b            | MMrb <b>[b]</b> <=>                                                                                                               | 0     | 1000 |  | Mouse secretion to outlet (body fluids) |
| MMRIBFLV <b>3b</b>             | MMb2o <b>[c]</b> + MMarp <b>[c]</b> + MMrb <b>[b]</b> -> MMarp <b>[c]</b> + MMb <b>[c]</b> + MMb <b>[c]</b> + MMrb <b>[b]</b>     | 0     | 1000 |  | Mouse secretion to outlet (body fluids) |
| MMRIBFLV <b>ub</b>             | MMb2o <b>[c]</b> + MMarp <b>[c]</b> + MMrb <b>[b]</b> -> MMarp <b>[c]</b> + MMb <b>[c]</b> + MMb <b>[c]</b> + MMrb <b>[b]</b>     | 0     | 1000 |  | Mouse secretion to outlet (body fluids) |
| MMEX_s2Dn2m2ms <b>e</b> b      | MMs2Dn2m2ms <b>[b]</b> <=>                                                                                                        | 0     | 1000 |  | Mouse secretion to outlet (body fluids) |
| MMs2L2FN2M2MAS <b>Nb</b>       | MMs2Dn2m2ms <b>[g]</b> -> MMs2L2n2m2ms <b>[b]</b>                                                                                 | 0     | 1000 |  | Mouse secretion to outlet (body fluids) |
| MMs2L2FN2M2MAS <b>Ndyb</b>     | MMs2Dn2m2ms <b>[b]</b> -> MMs2Dn2m2ms <b>[l]</b>                                                                                  | 0     | 1000 |  | Mouse secretion to outlet (body fluids) |
| MMEX_s2Dn2m2ms <b>e</b> b      | MMs2Dn2m2ms <b>[b]</b> <=>                                                                                                        | 0     | 1000 |  | Mouse secretion to outlet (body fluids) |
| MMs2L2N2M2M <b>ub</b>          | MMs2Dn2m2ms <b>[l]</b> <=> MMs2Dn2m2ms <b>[b]</b>                                                                                 | -1000 | 1000 |  | Mouse secretion to outlet (body fluids) |
| MMEX_s2Dn2m2ms <b>e</b> b      | MMs2Dn2m2ms <b>[b]</b> <=>                                                                                                        | 0     | 1000 |  | Mouse secretion to outlet (body fluids) |
| MMs2L2N2M2MAS <b>Ndyb</b>      | MMs2Dn2m2ms <b>[b]</b> -> MMs2Dn2m2ms <b>[l]</b>                                                                                  | 0     | 1000 |  | Mouse secretion to outlet (body fluids) |
| MMEX_sTa_antigen <b>e</b> b    | MMsTa_antigen <b>[b]</b> <=>                                                                                                      | 0     | 1000 |  | Mouse secretion to outlet (body fluids) |
| MMSTN_ANTIGE <b>Nb</b>         | MMsTa_antigen <b>[g]</b> -> MMsTa_antigen <b>[b]</b>                                                                              | 0     | 1000 |  | Mouse secretion to outlet (body fluids) |
| MMEX_sarc <b>e</b> b           | MMsarc <b>[b]</b> <=>                                                                                                             | 0     | 1000 |  | Mouse secretion to outlet (body fluids) |
| MMsABC <b>3ub</b>              | MMsarc <b>[b]</b> -> MMsarc <b>[c]</b>                                                                                            | 0     | 1000 |  | Mouse secretion to outlet (body fluids) |
| MMEX_sbt_D <b>e</b> b          | MMsb-D <b>[b]</b> <=>                                                                                                             | 0     | 1000 |  | Mouse secretion to outlet (body fluids) |
| MMS <b>l</b> T <b>3b</b>       | MMsb-D <b>[b]</b> <=> MMsb-D <b>[c]</b>                                                                                           | -1000 | 1000 |  | Mouse secretion to outlet (body fluids) |
| MMEX_scl <b>e</b> b            | MMscl <b>[b]</b> <=>                                                                                                              | 0     | 1000 |  | Mouse secretion to outlet (body fluids) |
| MMEX_ser_D <b>e</b> b          | MMser-D <b>[b]</b> <=>                                                                                                            | 0     | 1000 |  | Mouse secretion to outlet (body fluids) |
| MMEX_sL_L <b>e</b> b           | MMsL-L <b>[b]</b> <=>                                                                                                             | 0     | 1000 |  | Mouse secretion to outlet (body fluids) |
| MMsL <b>D</b> b                | MMsL-L <b>[c]</b> -> MMsL-L <b>[b]</b>                                                                                            | 0     | 1000 |  | Mouse secretion to outlet (body fluids) |
| MMEX_srd <b>e</b> b            | MMsrd <b>[b]</b> <=>                                                                                                              | 0     | 1000 |  | Mouse secretion to outlet (body fluids) |
| MMEX_spc_h <b>e</b> b          | MMspc_h <b>[b]</b> <=>                                                                                                            | 0     | 1000 |  | Mouse secretion to outlet (body fluids) |
| MMSPC_H <b>3b</b>              | MMspc_h <b>[c]</b> <=> MMspc_h <b>[b]</b>                                                                                         | -1000 | 1000 |  | Mouse secretion to outlet (body fluids) |
| MMEX_sphlp <b>e</b> b          | MMsphlp <b>[b]</b> <=>                                                                                                            | 0     | 1000 |  | Mouse secretion to outlet (body fluids) |
| MMSPH <b>P</b> ub              | MMsphlp <b>[c]</b> <=> MMsphlp <b>[b]</b>                                                                                         | -1000 | 1000 |  | Mouse secretion to outlet (body fluids) |
| MMEX_sphlp <b>e</b> b          | MMsphlp <b>[b]</b> <=>                                                                                                            | 0     | 1000 |  | Mouse secretion to outlet (body fluids) |
| MMSPHSI <b>P</b> ub            | MMsphlp <b>[c]</b> <=> MMsphlp <b>[b]</b>                                                                                         | -1000 | 1000 |  | Mouse secretion to outlet (body fluids) |
| MMEX_smt <b>e</b> b            | MMsmt <b>[b]</b> <=>                                                                                                              | 0     | 1000 |  | Mouse secretion to outlet (body fluids) |
| MMSRT <b>N</b> ub              | MMsmt <b>[b]</b> <=> MMsmt <b>[c]</b>                                                                                             | -1000 | 1000 |  | Mouse secretion to outlet (body fluids) |
| MMEX_smdc <b>e</b> b           | MMsmdc <b>[b]</b> <=>                                                                                                             | 0     | 1000 |  | Mouse secretion to outlet (body fluids) |
| MMSTRE <b>NC</b> b             | MMsmdc <b>[b]</b> <=> MMsmdc <b>[c]</b>                                                                                           | -1000 | 1000 |  | Mouse secretion to outlet (body fluids) |
| MMEX_susc <b>e</b> b           | MMsusc <b>[b]</b> <=>                                                                                                             | 0     | 1000 |  | Mouse secretion to outlet (body fluids) |
| MMEX_susc <b>e</b> b           | MMsusc <b>[b]</b> <=>                                                                                                             | 0     | 1000 |  | Mouse secretion to outlet (body fluids) |
| MMEX_tag_h <b>e</b> b          | MMtag_h <b>[b]</b> <=>                                                                                                            | 0     | 1000 |  | Mouse secretion to outlet (body fluids) |
| MMTAG <b>IST</b> ub            | MMtag_h <b>[c]</b> -> MMtag_h <b>[b]</b>                                                                                          | 0     | 1000 |  | Mouse secretion to outlet (body fluids) |
| MMTAG <b>b</b>                 | MMtag_h <b>[b]</b> <=> MMtag_h <b>[c]</b>                                                                                         | -1000 | 1000 |  | Mouse secretion to outlet (body fluids) |
| MMEX_sagat_D <b>e</b> b        | MMsagat-D <b>[b]</b> <=>                                                                                                          | 0     | 1000 |  | Mouse secretion to outlet (body fluids) |
| MMTAGAT_D <b>b</b>             | MMsagat-D <b>[b]</b> -> MMsagat-D <b>[c]</b>                                                                                      | 0     | 1000 |  | Mouse secretion to outlet (body fluids) |
| MMEX_saur <b>e</b> b           | MMsaur <b>[b]</b> <=>                                                                                                             | 0     | 1000 |  | Mouse secretion to outlet (body fluids) |
| MMEX_saxo <b>e</b> b           | MMsaxo <b>[b]</b> <=>                                                                                                             | 0     | 1000 |  | Mouse secretion to outlet (body fluids) |
| MMTAXOL <b>ab</b>              | MMsaxo <b>[b]</b> <=> MMsaxo <b>[c]</b>                                                                                           | -1000 | 1000 |  | Mouse secretion to outlet (body fluids) |
| MMEX_schd <b>e</b> b           | MMschd <b>[b]</b> <=>                                                                                                             | 0     | 1000 |  | Mouse secretion to outlet (body fluids) |
| MMTCHOL <b>Ac</b> b            | MMb2o <b>[c]</b> + MMarp <b>[c]</b> + MMschd <b>[b]</b> -> MMarp <b>[c]</b> + MMb <b>[c]</b> + MMb <b>[c]</b> + MMschd <b>[b]</b> | 0     | 1000 |  | Mouse secretion to outlet (body fluids) |
| MMTCHOL <b>Ab</b>              | MMschd <b>[b]</b> <=> MMschd <b>[c]</b>                                                                                           | -1000 | 1000 |  | Mouse secretion to outlet (body fluids) |
| MMEX_scynt <b>e</b> b          | MMscynt <b>[b]</b> <=>                                                                                                            | 0     | 1000 |  | Mouse secretion to outlet (body fluids) |
| MMTCYNT <b>b</b>               | MMscynt <b>[c]</b> -> MMscynt <b>[b]</b>                                                                                          | 0     | 1000 |  | Mouse secretion to outlet (body fluids) |
| MMEX_schd <b>e</b> b           | MMschd <b>[b]</b> <=>                                                                                                             | 0     | 1000 |  | Mouse secretion to outlet (body fluids) |
| MMTDC <b>HOL</b> Ab            | MMschd <b>[b]</b> <=> MMschd <b>[c]</b>                                                                                           | -1000 | 1000 |  | Mouse secretion to outlet (body fluids) |
| MMEX_schd <b>e</b> b           | MMschd <b>[b]</b> <=>                                                                                                             | 0     | 1000 |  | Mouse secretion to outlet (body fluids) |
| MMTDC <b>HOL</b> Ab            | MMschd <b>[b]</b> <=> MMschd <b>[c]</b>                                                                                           | -1000 | 1000 |  | Mouse secretion to outlet (body fluids) |
| MMEX_schex <b>e</b> b          | MMschex <b>[b]</b> <=>                                                                                                            | 0     | 1000 |  | Mouse secretion to outlet (body fluids) |
| MMTETH <b>EX</b> ub            | MMschex <b>[b]</b> <=> MMschex <b>[c]</b>                                                                                         | -1000 | 1000 |  | Mouse secretion to outlet (body fluids) |
| MMEX_sespt <b>3</b> e <b>b</b> | MMsespt <b>[b]</b> <=>                                                                                                            | 0     | 1000 |  | Mouse secretion to outlet (body fluids) |
| MMTEPENT <b>3</b> b            | MMsespt <b>[b]</b> <=> MMsespt <b>[c]</b>                                                                                         | -1000 | 1000 |  | Mouse secretion to outlet (body fluids) |
| MMEX_sespt <b>e</b> b          | MMsespt <b>[b]</b> <=>                                                                                                            | 0     | 1000 |  | Mouse secretion to outlet (body fluids) |
| MMTEPENT <b>ub</b>             | MMsespt <b>[b]</b> <=> MMsespt <b>[c]</b>                                                                                         | -1000 | 1000 |  | Mouse secretion to outlet (body fluids) |
| MMEX_senec <b>e</b> b          | MMsenec <b>[b]</b> <=>                                                                                                            | 0     | 1000 |  | Mouse secretion to outlet (body fluids) |
| MMTETTE <b>ub</b>              | MMsenec <b>[b]</b> <=> MMsenec <b>[c]</b>                                                                                         | -1000 | 1000 |  | Mouse secretion to outlet (body fluids) |
| MMEX_sbl <b>e</b> b            | MMsbl <b>[b]</b> <=>                                                                                                              | 0     | 1000 |  | Mouse secretion to outlet (body fluids) |
| MMEX_smtc <b>e</b> b           | MMsmt <b>[b]</b> <=>                                                                                                              | 0     | 1000 |  | Mouse secretion to outlet (body fluids) |
| MMTHMAT <b>P</b> ub            | MMb2o <b>[c]</b> + MMarp <b>[c]</b> + MMsmt <b>[c]</b> -> MMarp <b>[c]</b> + MMb <b>[c]</b> + MMb <b>[c]</b> + MMsmt <b>[b]</b>   | 0     | 1000 |  | Mouse secretion to outlet (body fluids) |
| MMEX_sump <b>e</b> b           | MMsump <b>[b]</b> <=>                                                                                                             | 0     | 1000 |  | Mouse secretion to outlet (body fluids) |
| MMEX_sump <b>e</b> b           | MMsump <b>[b]</b> <=>                                                                                                             | 0     | 1000 |  | Mouse secretion to outlet (body fluids) |
| MMTHY <b>3</b> b               | MMthy <b>[b]</b> <=> MMthy <b>[c]</b>                                                                                             | -1000 | 1000 |  | Mouse secretion to outlet (body fluids) |
| MMEX_slynal <b>e</b> b         | MMthy <b>[b]</b> <=>                                                                                                              | 0     | 1000 |  | Mouse secretion to outlet (body fluids) |
| MMTHYMD <b>1</b> b             | MMthy <b>[b]</b> -> MMthy <b>[c]</b>                                                                                              | 0     | 1000 |  | Mouse secretion to outlet (body fluids) |
| MMEX_slyox_L <b>e</b> b        | MMthyox-L <b>[b]</b> <=>                                                                                                          | 0     | 1000 |  | Mouse secretion to outlet (body fluids) |
| MMTHYOX <b>2</b> b             | MMthyox-L <b>[b]</b> <=> MMthyox-L <b>[c]</b>                                                                                     | -1000 | 1000 |  | Mouse secretion to outlet (body fluids) |
| MMEX_smdc <b>e</b> b           | MMsmdc <b>[b]</b> <=>                                                                                                             | 0     | 1000 |  | Mouse secretion to outlet (body fluids) |
| MMTMND <b>NC</b> b             | MMsmdc <b>[b]</b> <=> MMsmdc <b>[c]</b>                                                                                           | -1000 | 1000 |  | Mouse secretion to outlet (body fluids) |
| MMEX_sdbutamide <b>e</b> b     | MMsdbutamide <b>[b]</b> <=>                                                                                                       | 0     | 1000 |  | Mouse secretion to outlet (body fluids) |
| MMTOLBUTAMIDE <b>ub</b>        | MMsdbutamide <b>[b]</b> <=> MMsdbutamide <b>[c]</b>                                                                               | -1000 | 1000 |  | Mouse secretion to outlet (body fluids) |
| MMEX_smt <b>e</b> b            | MMsmt <b>[b]</b> <=>                                                                                                              | 0     | 1000 |  | Mouse secretion to outlet (body fluids) |
| MMEX_smdly <b>e</b> b          | MMsmdly <b>[b]</b> <=>                                                                                                            | 0     | 1000 |  | Mouse secretion to outlet (body fluids) |
| MMTROODTHY <b>2</b> b          | MMsmdly <b>[b]</b> <=> MMsmdly <b>[c]</b>                                                                                         | -1000 | 1000 |  | Mouse secretion to outlet (body fluids) |
| MMEX_smdlyout <b>e</b> b       | MMsmdlyout <b>[b]</b> <=>                                                                                                         | 0     | 1000 |  | Mouse secretion to outlet (body fluids) |
| MMTROODTHY <b>SUF</b> ub       | MMsmdlyout <b>[c]</b> -> MMsmdlyout <b>[b]</b>                                                                                    | 0     | 1000 |  | Mouse secretion to outlet (body fluids) |
| MMEX_sp_L <b>e</b> b           | MMsp-L <b>[b]</b> <=>                                                                                                             | 0     | 1000 |  | Mouse secretion to outlet (body fluids) |



|                                                   |                                                                                                |   |   |  |                                           |
|---------------------------------------------------|------------------------------------------------------------------------------------------------|---|---|--|-------------------------------------------|
| MMShoneprank[e]utr                                | MMShoneprank[e] <> Shoneprank[u]                                                               | 0 | 0 |  | Internal exchange reaction mouse <> lumen |
| MMStrap[e]utr                                     | MMStrap[e] <> Strap[u]                                                                         | 0 | 0 |  | Internal exchange reaction mouse <> lumen |
| MM5mth[e]utr                                      | MM5mth[e] <> 5mth[u]                                                                           | 0 | 0 |  | Internal exchange reaction mouse <> lumen |
| MMObstureone[e]utr                                | MMObstureone[e] <> Obstureone[u]                                                               | 0 | 0 |  | Internal exchange reaction mouse <> lumen |
| MMab[e]utr                                        | MMab[e] <> ab[u]                                                                               | 0 | 0 |  | Internal exchange reaction mouse <> lumen |
| MMfabu[e]utr                                      | MMfabu[e] <> fabu[u]                                                                           | 0 | 0 |  | Internal exchange reaction mouse <> lumen |
| MMaca[e]utr                                       | MMaca[e] <> ac[u]                                                                              | 0 | 0 |  | Internal exchange reaction mouse <> lumen |
| MMacal[e]utr                                      | MMacal[e] <> acal[u]                                                                           | 0 | 0 |  | Internal exchange reaction mouse <> lumen |
| MMacone[e]utr                                     | MMacone[e] <> acone[u]                                                                         | 0 | 0 |  | Internal exchange reaction mouse <> lumen |
| MMacgalligalga1c12gal4acgpalphide,he[e]utr        | MMacgalligalga1c12gal4acgpalphide,he[e] <> acgalligalga1c12gal4acgpalphide,he[u]               | 0 | 0 |  | Internal exchange reaction mouse <> lumen |
| MMacgalligalga1cgalga1c12gal4acgpalphide,he[e]utr | MMacgalligalga1cgalga1c12gal4acgpalphide,he[e] <> acgalligalga1cgalga1c12gal4acgpalphide,he[u] | 0 | 0 |  | Internal exchange reaction mouse <> lumen |
| MMacga[e]utr                                      | MMacga[e] <> acg[u]                                                                            | 0 | 0 |  | Internal exchange reaction mouse <> lumen |
| MMach[e]utr                                       | MMach[e] <> ach[u]                                                                             | 0 | 0 |  | Internal exchange reaction mouse <> lumen |
| MMh2[e]utr                                        | MMh2[e] <> h2[u]                                                                               | 0 | 0 |  | Internal exchange reaction mouse <> lumen |
| MMac[e]utr                                        | MMac[e] <> ac[u]                                                                               | 0 | 0 |  | Internal exchange reaction mouse <> lumen |
| MMcho[e]utr                                       | MMcho[e] <> cho[u]                                                                             | 0 | 0 |  | Internal exchange reaction mouse <> lumen |
| MMacn13acnpalpbide,he[e]utr                       | MMacn13acnpalpbide,he[e] <> acn13acnpalpbide,he[u]                                             | 0 | 0 |  | Internal exchange reaction mouse <> lumen |
| MMacn23acnpalpbide,he[e]utr                       | MMacn23acnpalpbide,he[e] <> acn23acnpalpbide,he[u]                                             | 0 | 0 |  | Internal exchange reaction mouse <> lumen |
| MMacncngall1acgpalpbide,he[e]utr                  | MMacncngall1acgpalpbide,he[e] <> acncngall1acgpalpbide,he[u]                                   | 0 | 0 |  | Internal exchange reaction mouse <> lumen |
| MMMacncngalpbide,he[e]utr                         | MMMacncngalpbide,he[e] <> acmacncngalpbide,he[u]                                               | 0 | 0 |  | Internal exchange reaction mouse <> lumen |
| MMacunc[e]utr                                     | MMacunc[e] <> acunc[u]                                                                         | 0 | 0 |  | Internal exchange reaction mouse <> lumen |
| MMacncugalkgal14acgpalpbide,he[e]utr              | MMacncugalkgal14acgpalpbide,he[e] <> acncugalkgal14acgpalpbide,he[u]                           | 0 | 0 |  | Internal exchange reaction mouse <> lumen |
| MMah[e]utr                                        | MMah[e] <> ah[u]                                                                               | 0 | 0 |  | Internal exchange reaction mouse <> lumen |
| MMam[e]utr                                        | MMam[e] <> am[u]                                                                               | 0 | 0 |  | Internal exchange reaction mouse <> lumen |
| MMah[e]utr                                        | MMah[e] <> ah[u]                                                                               | 0 | 0 |  | Internal exchange reaction mouse <> lumen |
| MMade[e]utr                                       | MMade[e] <> ad[u]                                                                              | 0 | 0 |  | Internal exchange reaction mouse <> lumen |
| MMadgr[e]utr                                      | MMadgr[e] <> adgr[u]                                                                           | 0 | 0 |  | Internal exchange reaction mouse <> lumen |
| MMadm[e]utr                                       | MMadm[e] <> adm[u]                                                                             | 0 | 0 |  | Internal exchange reaction mouse <> lumen |
| MMadu[e]utr                                       | MMadu[e] <> adu[u]                                                                             | 0 | 0 |  | Internal exchange reaction mouse <> lumen |
| MMahuone[e]utr                                    | MMahuone[e] <> ahune[u]                                                                        |   |   |  | Internal exchange reaction mouse <> lumen |
| MMahandrong[e]utr                                 | MMahandrong[e] <> ahandrong[u]                                                                 | 0 | 0 |  | Internal exchange reaction mouse <> lumen |
| MMak2lghel,e[e]utr                                | MMak2lghel,e[e] <> ak2lghel,he[u]                                                              | 0 | 0 |  | Internal exchange reaction mouse <> lumen |
| MMak[e]utr                                        | MMak[e] <> ak[u]                                                                               | 0 | 0 |  | Internal exchange reaction mouse <> lumen |
| MMab-1[e]utr                                      | MMab-1[e] <> ab-1[u]                                                                           | 0 | 0 |  | Internal exchange reaction mouse <> lumen |
| MMam-1[e]utr                                      | MMam-1[e] <> am-1[u]                                                                           | 0 | 0 |  | Internal exchange reaction mouse <> lumen |
| MMcys-1[e]utr                                     | MMcys-1[e] <> cys-1[u]                                                                         | 0 | 0 |  | Internal exchange reaction mouse <> lumen |
| MMab-D[e]utr                                      | MMab-D[e] <> ab-D[u]                                                                           | 0 | 0 |  | Internal exchange reaction mouse <> lumen |
| MMgh-L[e]utr                                      | MMgh-L[e] <> gh-L[u]                                                                           | 0 | 0 |  | Internal exchange reaction mouse <> lumen |
| MMgh[e]utr                                        | MMgh[e] <> gh[u]                                                                               | 0 | 0 |  | Internal exchange reaction mouse <> lumen |
| MMle-1[e]utr                                      | MMle-1[e] <> le-1[u]                                                                           | 0 | 0 |  | Internal exchange reaction mouse <> lumen |
| MMphe-L[e]utr                                     | MMphe-L[e] <> phe-L[u]                                                                         | 0 | 0 |  | Internal exchange reaction mouse <> lumen |
| MMer-L[e]utr                                      | MMer-L[e] <> er-L[u]                                                                           | 0 | 0 |  | Internal exchange reaction mouse <> lumen |
| MMhr-L[e]utr                                      | MMhr-L[e] <> hr-L[u]                                                                           | 0 | 0 |  | Internal exchange reaction mouse <> lumen |
| MMarg-L[e]utr                                     | MMarg-L[e] <> arg-L[u]                                                                         | 0 | 0 |  | Internal exchange reaction mouse <> lumen |
| MMakim[e]utr                                      | MMakim[e] <> akim[u]                                                                           | 0 | 0 |  | Internal exchange reaction mouse <> lumen |
| MMcg[e]utr                                        | MMcg[e] <> cg[u]                                                                               | 0 | 0 |  | Internal exchange reaction mouse <> lumen |
| MMuch[e]utr                                       | MMuch[e] <> uch[u]                                                                             | 0 | 0 |  | Internal exchange reaction mouse <> lumen |
| MMgk-D[e]utr                                      | MMgk-D[e] <> gk-D[u]                                                                           | 0 | 0 |  | Internal exchange reaction mouse <> lumen |
| MMurch2[e]utr                                     | MMurch2[e] <> urch2[u]                                                                         | 0 | 0 |  | Internal exchange reaction mouse <> lumen |
| MMghyz2[e]utr                                     | MMghyz2[e] <> ghyz2[u]                                                                         | 0 | 0 |  | Internal exchange reaction mouse <> lumen |
| MMghyz[e]utr                                      | MMghyz[e] <> ghyz[u]                                                                           | 0 | 0 |  | Internal exchange reaction mouse <> lumen |
| MMandrung[e]utr                                   | MMandrung[e] <> andrung[u]                                                                     | 0 | 0 |  | Internal exchange reaction mouse <> lumen |
| MMandrang[e]utr                                   | MMandrang[e] <> andrang[u]                                                                     | 0 | 0 |  | Internal exchange reaction mouse <> lumen |
| MMangyrene[e]utr                                  | MMangyrene[e] <> angyrene[u]                                                                   |   |   |  | Internal exchange reaction mouse <> lumen |
| MMaprox[e]utr                                     | MMaprox[e] <> aprox[u]                                                                         | 0 | 0 |  | Internal exchange reaction mouse <> lumen |
| MMappin[e]utr                                     | MMappin[e] <> appin[u]                                                                         | 0 | 0 |  | Internal exchange reaction mouse <> lumen |
| MMapgin[e]utr                                     | MMapgin[e] <> apgin[u]                                                                         | 0 | 0 |  | Internal exchange reaction mouse <> lumen |
| MMagobal[e]utr                                    | MMagobal[e] <> agobal[u]                                                                       | 0 | 0 |  | Internal exchange reaction mouse <> lumen |
| MMarab-L[e]utr                                    | MMarab-L[e] <> arab-L[u]                                                                       | 0 | 0 |  | Internal exchange reaction mouse <> lumen |
| MMarach[e]utr                                     | MMarach[e] <> arach[u]                                                                         | 0 | 0 |  | Internal exchange reaction mouse <> lumen |
| MMarac[e]utr                                      | MMarac[e] <> arac[u]                                                                           | 0 | 0 |  | Internal exchange reaction mouse <> lumen |
| MMys-L[e]utr                                      | MMys-L[e] <> ys-L[u]                                                                           | 0 | 0 |  | Internal exchange reaction mouse <> lumen |
| MMasch-L[e]utr                                    | MMasch-L[e] <> asch-L[u]                                                                       | 0 | 0 |  | Internal exchange reaction mouse <> lumen |
| MMap-D[e]utr                                      | MMap-D[e] <> ap-D[u]                                                                           | 0 | 0 |  | Internal exchange reaction mouse <> lumen |
| MMk[e]utr                                         | MMk[e] <> k[u]                                                                                 | 0 | 0 |  | Internal exchange reaction mouse <> lumen |
| MMap-L[e]utr                                      | MMap-L[e] <> ap-L[u]                                                                           | 0 | 0 |  | Internal exchange reaction mouse <> lumen |
| MMap[e]utr                                        | MMap[e] <> ap[u]                                                                               | 0 | 0 |  | Internal exchange reaction mouse <> lumen |
| MMang[e]utr                                       | MMang[e] <> ang[u]                                                                             | 0 | 0 |  | Internal exchange reaction mouse <> lumen |
| MMap[e]utr                                        | MMap[e] <> p[u]                                                                                | 0 | 0 |  | Internal exchange reaction mouse <> lumen |
| MMad[e]utr                                        | MMad[e] <> ad[u]                                                                               | 0 | 0 |  | Internal exchange reaction mouse <> lumen |
| MMave1[e]utr                                      | MMave1[e] <> ave1[u]                                                                           | 0 | 0 |  | Internal exchange reaction mouse <> lumen |
| MMave2[e]utr                                      | MMave2[e] <> ave2[u]                                                                           | 0 | 0 |  | Internal exchange reaction mouse <> lumen |
| MMab-B[e]utr                                      | MMab-B[e] <> ab-B[u]                                                                           | 0 | 0 |  | Internal exchange reaction mouse <> lumen |
| MMgk[e]utr                                        | MMgk[e] <> gk[u]                                                                               | 0 | 0 |  | Internal exchange reaction mouse <> lumen |
| MMgkch[e]utr                                      | MMgkch[e] <> gkch[u]                                                                           | 0 | 0 |  | Internal exchange reaction mouse <> lumen |
| MMgkch[e]utr                                      | MMgkch[e] <> gkch[u]                                                                           | 0 | 0 |  | Internal exchange reaction mouse <> lumen |
| MMgkch[e]utr                                      | MMgkch[e] <> gkch[u]                                                                           | 0 | 0 |  | Internal exchange reaction mouse <> lumen |
| MMh[e]utr                                         | MMh[e] <> h[u]                                                                                 | 0 | 0 |  | Internal exchange reaction mouse <> lumen |
| MMhdkgur[e]utr                                    | MMhdkgur[e] <> hdkgur[u]                                                                       | 0 | 0 |  | Internal exchange reaction mouse <> lumen |
| MMhkgur[e]utr                                     | MMhkgur[e] <> hkgur[u]                                                                         | 0 | 0 |  | Internal exchange reaction mouse <> lumen |
| MMhah[e]utr                                       | MMhah[e] <> hah[u]                                                                             | 0 | 0 |  | Internal exchange reaction mouse <> lumen |
| MMhacy[e]utr                                      | MMhacy[e] <> hacy[u]                                                                           | 0 | 0 |  | Internal exchange reaction mouse <> lumen |
| MMh[e]utr                                         | MMh[e] <> h[u]                                                                                 | 0 | 0 |  | Internal exchange reaction mouse <> lumen |
| MMhuf[e]utr                                       | MMhuf[e] <> huf[u]                                                                             | 0 | 0 |  | Internal exchange reaction mouse <> lumen |

[illegible]

[illegible]



[illegible]
